# Supplementary material for: Specific Changes in Arabidopsis thaliana Rosette Lipids during Freezing Can Be Associated with Freezing Tolerance
Source: MDPI journal article supplement (doi:10.3390/metabo12050385), 2022-04-23

Figure S1. Positive and negative correlations of lipid levels with ion leakage at the final (98-h) time point. Positive correlation indicates that higher levels of the lipid are associated with more ion leakage (i.e., a deleterious effect), while negative correlations indicate that higher levels of the lipid are associated with lower ion leakage (potentially a beneficial effect). A. Lipid levels at 72 h. B. Lipid levels at 75 h. C. Lipid levels at 77 h.

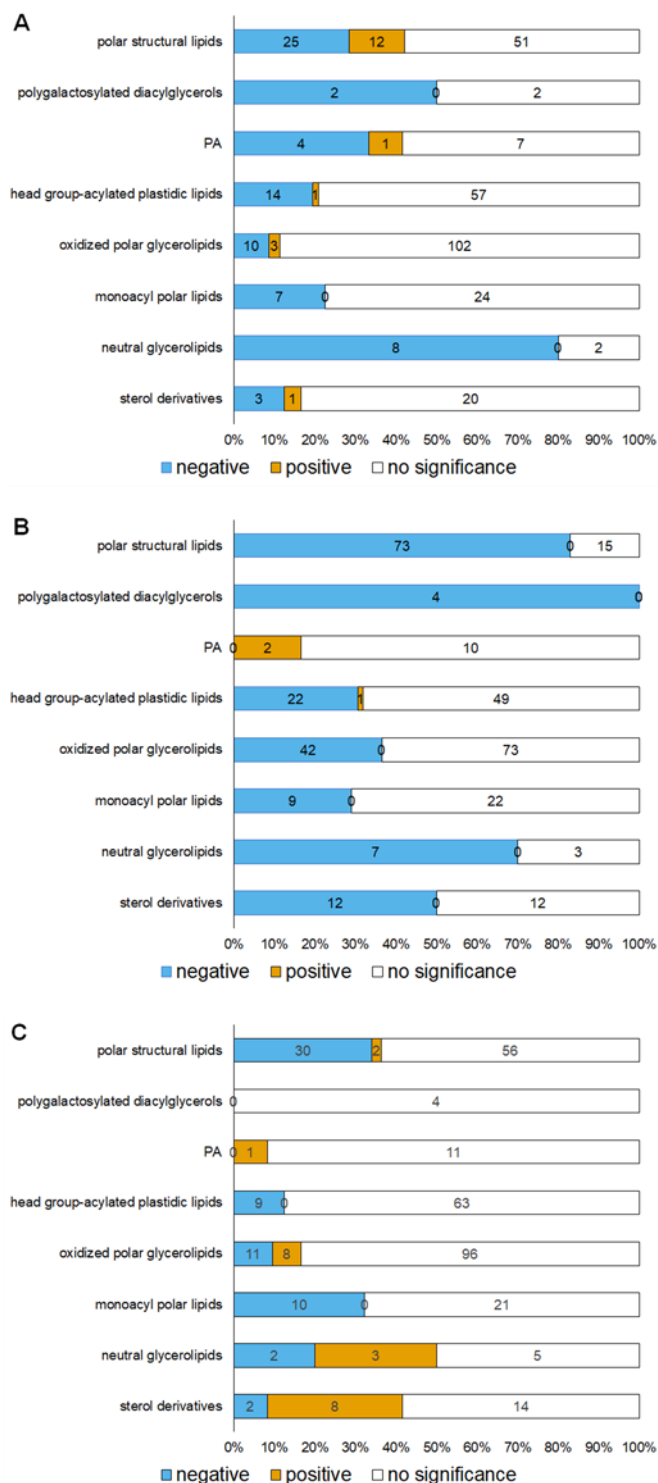

Figure S2. Time courses of levels of selected polar structural lipids in rosettes of control, non-acclimated, and acclimated plants. Treatments are shown in Figure 1. Asterisks indicate lipids with quality control (pooled sample) levels less than 0.75 (\*) or 0.25 (\*\*) units of normalized mass spectral intensity, where 1 = intensity of 1 pmol of internal standard. "C" indicates that the lipid level in non-acclimated or acclimated plants is significantly different than the control level, and "A" indicates that the lipid level in non-acclimated plants is significantly different than the level in acclimated plants (Table S2). Indicated on each plot is whether there is significant correlation of lipid level at the 74, 75, and 77 h time points with final (98 h) ion leakage.

| Lipid number             | Panel | Class, oxidation   | Lipid name                |
|--------------------------|-------|--------------------|---------------------------|
| <b>non-oxidized DGDG</b> |       |                    |                           |
| lipid0164                | 2A    | DGDG, non-oxidized | DGDG 34:3                 |
| lipid0163                | 2A    | DGDG, non-oxidized | DGDG 34:4                 |
| lipid0170                | 2B    | DGDG, non-oxidized | DGDG 36:3                 |
| lipid0169                | 2B    | DGDG, non-oxidized | DGDG 36:4                 |
| lipid0168                | 2C    | DGDG, non-oxidized | DGDG 36:5                 |
| lipid0167                | 2C    | DGDG, non-oxidized | DGDG 36:6                 |
| lipid0174                | 2D    | DGDG, ambiguous    | DGDG 38:5 or DGDG 36:7;O2 |
| <b>non-oxidized MGDG</b> |       |                    |                           |
| lipid0143                | 2D    | MGDG, non-oxidized | MGDG 34:3                 |
| lipid0142                | 2E    | MGDG, non-oxidized | MGDG 34:4                 |
| lipid0141                | 2E    | MGDG, non-oxidized | MGDG 34:5                 |
| lipid0140                | 2F    | MGDG, non-oxidized | MGDG 34:6                 |
| lipid0808                | 2F    | MGDG, non-oxidized | MGDG 35:3                 |
| lipid0149                | 2G    | MGDG, non-oxidized | MGDG 36:3                 |
| lipid0148                | 2G    | MGDG, ambiguous    | MGDG 36:4 or MGDG 34:6;O2 |
| lipid0147                | 2H    | MGDG, ambiguous    | MGDG 36:5 or MGDG 34:7;O2 |
| lipid0146                | 2H    | MGDG, ambiguous    | MGDG 36:6 or MGDG 34:8;O2 |
| lipid0153                | 2I    | MGDG, ambiguous    | MGDG 38:5 or MGDG 36:7;O2 |
| <b>non-oxidized PG</b>   |       |                    |                           |
| lipid0008                | 2I    | PG, non-oxidized   | PG 32:0                   |
| lipid0007                | 2J    | PG, non-oxidized   | PG 32:1                   |
| lipid0012                | 2J    | PG, non-oxidized   | PG 34:1                   |
| lipid0011                | 2K    | PG, non-oxidized   | PG 34:2                   |
| lipid0010                | 2K    | PG, non-oxidized   | PG 34:3                   |
| lipid0009                | 2L    | PG, non-oxidized   | PG 34:4                   |
| lipid0018                | 2L    | PG, non-oxidized   | PG 36:2                   |
| lipid0017                | 2M    | PG, non-oxidized   | PG 36:3                   |
| lipid0016                | 2M    | PG, non-oxidized   | PG 36:4                   |

|                        |     |                    |                                     |
|------------------------|-----|--------------------|-------------------------------------|
| lipid0015              | 2N  | PG, non-oxidized   | PG 36:5                             |
| lipid0014              | 2N  | PG, non-oxidized   | PG 36:6                             |
| <b>non-oxidized PC</b> |     |                    |                                     |
| lipid0841              | 2O  | PC, non-oxidized   | PC 32:1                             |
| lipid0840              | 2O  | PC, non-oxidized   | PC 32:3                             |
| lipid0035              | 2P  | PC, non-oxidized   | PC 34:1                             |
| lipid0034              | 2P  | PC, non-oxidized   | PC 34:2                             |
| lipid0842              | 2Q  | PC, non-oxidized   | PC 34:6                             |
| lipid0040              | 2Q  | PC, non-oxidized   | PC 36:2                             |
| lipid0039              | 2R  | PC, non-oxidized   | PC 36:3                             |
| lipid0038              | 2R  | PC, non-oxidized   | PC 36:4                             |
| lipid0037              | 2S  | PC, non-oxidized   | PC 36:5                             |
| lipid0046              | 2S  | PC, non-oxidized   | PC 38:2                             |
| lipid0045              | 2T  | PC, non-oxidized   | PC 38:3                             |
| lipid0044              | 2T  | PC, non-oxidized   | PC 38:4                             |
| lipid0043              | 2U  | PC, non-oxidized   | PC 38:5                             |
| lipid0042              | 2U  | PC, non-oxidized   | PC 38:6                             |
| lipid0050              | 2V  | PC, non-oxidized   | PC 40:2*                            |
| lipid0049              | 2V  | PC, non-oxidized   | PC 40:3*                            |
| lipid0048              | 2W  | PC, non-oxidized   | PC 40:4*                            |
| lipid0047              | 2W  | PC, non-oxidized   | PC 40:5*                            |
| <b>non-oxidized PE</b> |     |                    |                                     |
| lipid0063              | 2X  | PE, non-oxidized   | PE 34:2                             |
| lipid0062              | 2X  | PE, non-oxidized   | PE 34:3                             |
| lipid0069              | 2Y  | PE, non-oxidized   | PE 36:2                             |
| lipid0068              | 2Y  | PE, non-oxidized   | PE 36:3                             |
| lipid0067              | 2Z  | PE, non-oxidized   | PE 36:4                             |
| lipid0066              | 2Z  | PE, non-oxidized   | PE 36:5                             |
| lipid0065              | 2AA | PE, non-oxidized   | PE 36:6                             |
| lipid0073              | 2AA | PE, non-oxidized   | PE 38:4                             |
| lipid0072              | 2BB | PE, non-oxidized   | PE 38:5                             |
| lipid0075              | 2BB | PE, non-oxidized   | PE 40:3                             |
| lipid0079              | 2CC | PE, non-oxidized   | PE 42:2                             |
| lipid0078              | 2CC | PE, non-oxidized   | PE 42:3 (measured in positive mode) |
| <b>PS</b>              |     |                    |                                     |
| lipid0095              | 2DD | PS, non-oxidized   | PS 34:3                             |
| lipid0116              | 2DD | PS, non-oxidized   | PS 42:2                             |
| lipid0115              | 2EE | PS, non-oxidized   | PS 42:3                             |
| <b>sphingolipids</b>   |     |                    |                                     |
| lipid0210              | 2EE | GIPC, non-oxidized | GIPC 42:1;O4                        |
| lipid0212              | 2FF | GIPC, non-oxidized | GIPC 42:2;O4                        |

DGDG 34:3 (lipid0164)

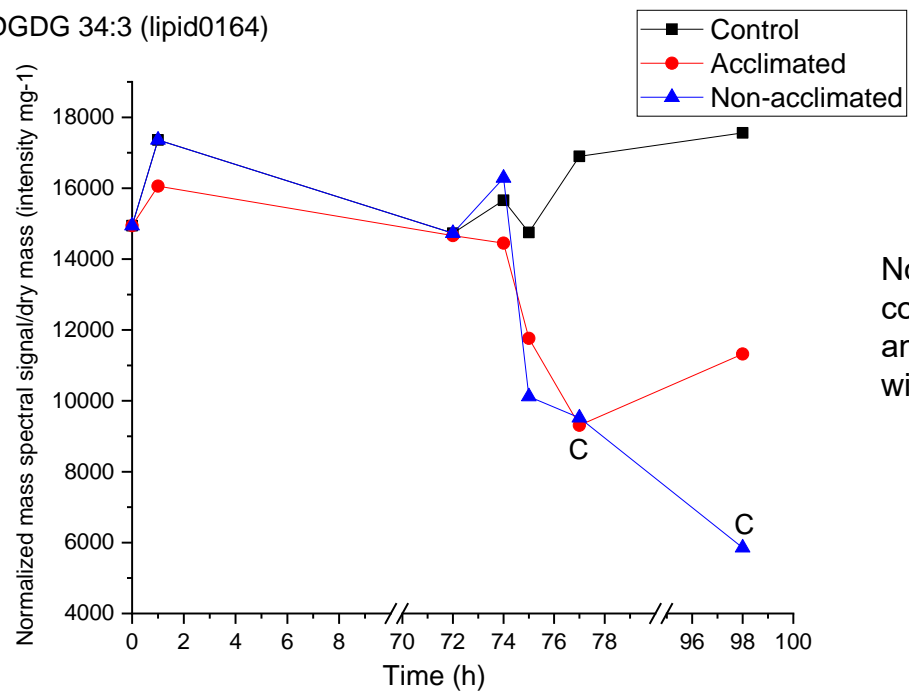

No significant correlation of 74, 75, and 77 h lipid levels with final ion leakage

DGDG 34:4 (lipid0163)

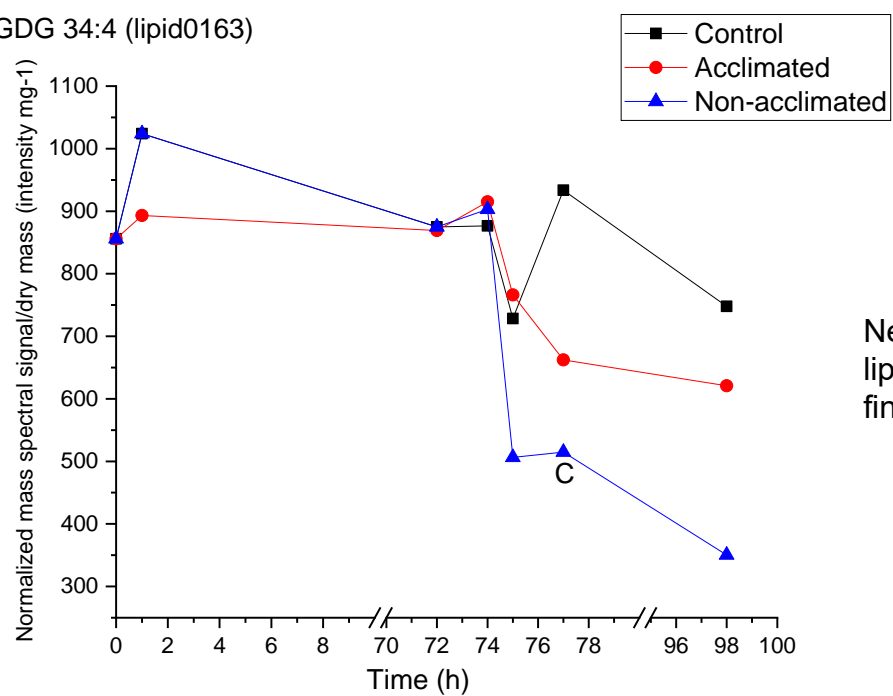

Negative correlation of lipid level at 75 h with final ion leakage

DGDG 36:3 (lipid0170)

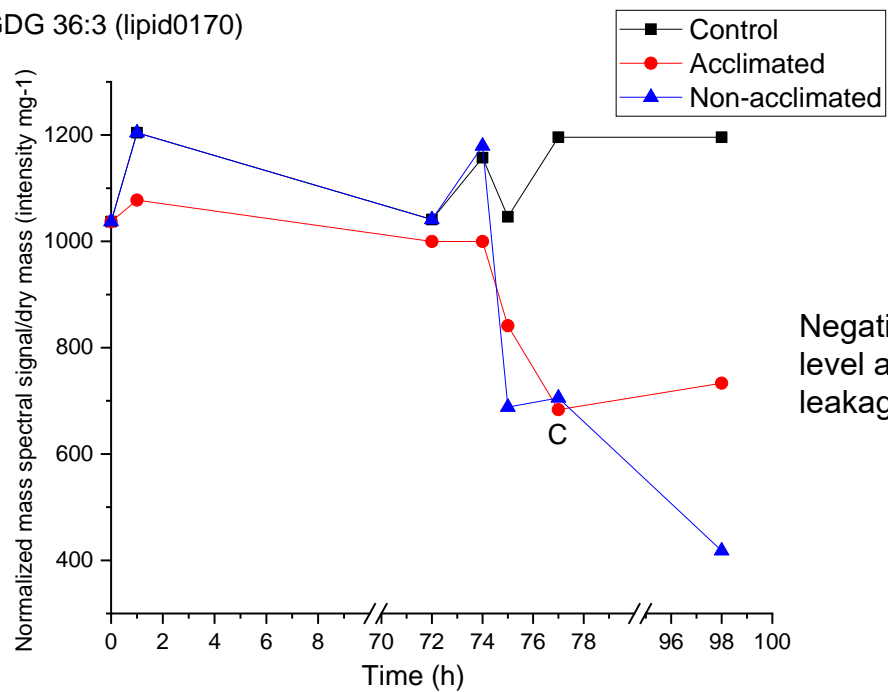

DGDG 36:4 (lipid0169)

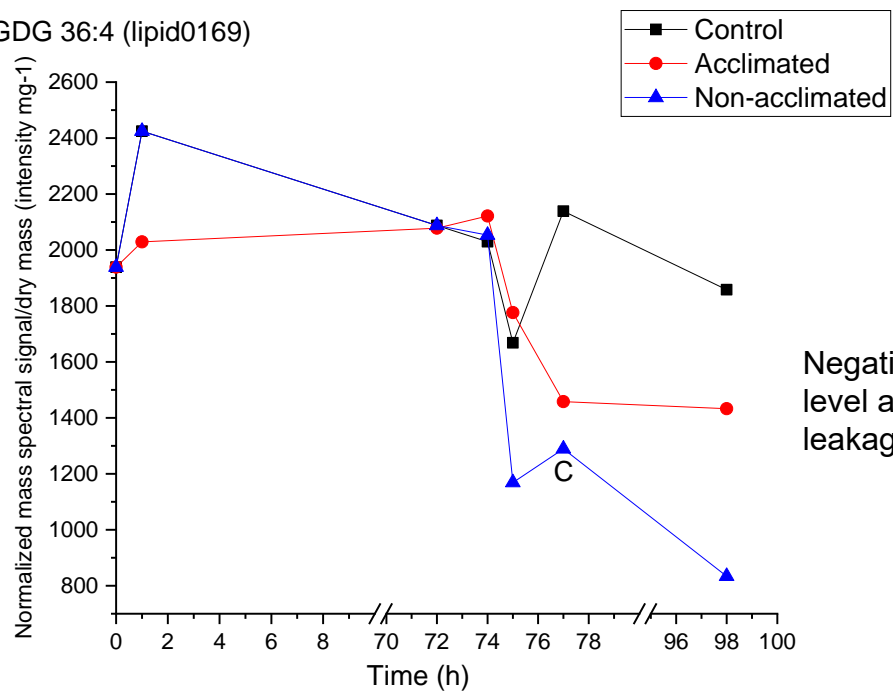

DGDG 36:5 (lipid0168)

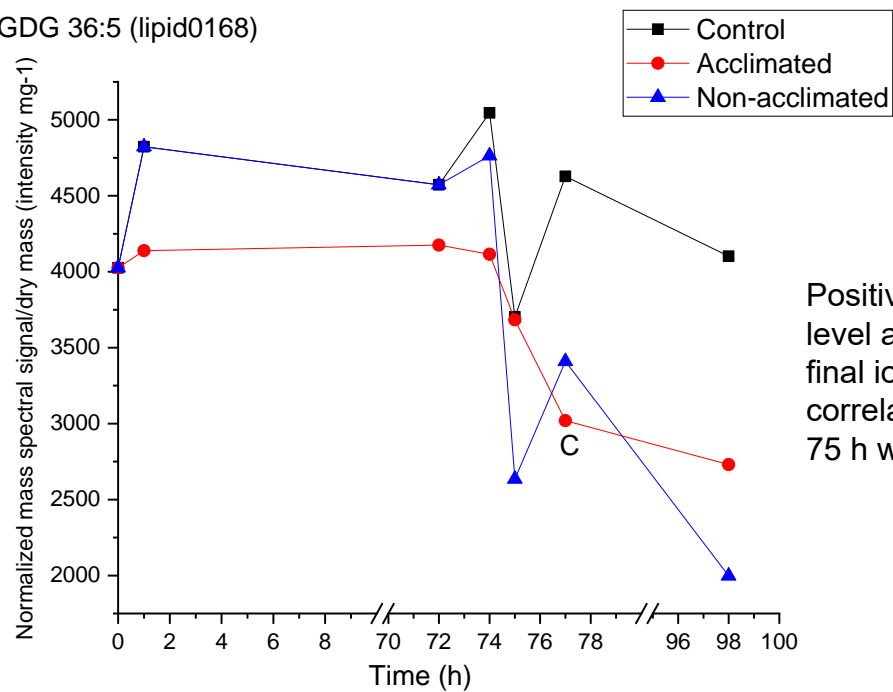

DGDG 36:6 (lipid0167)

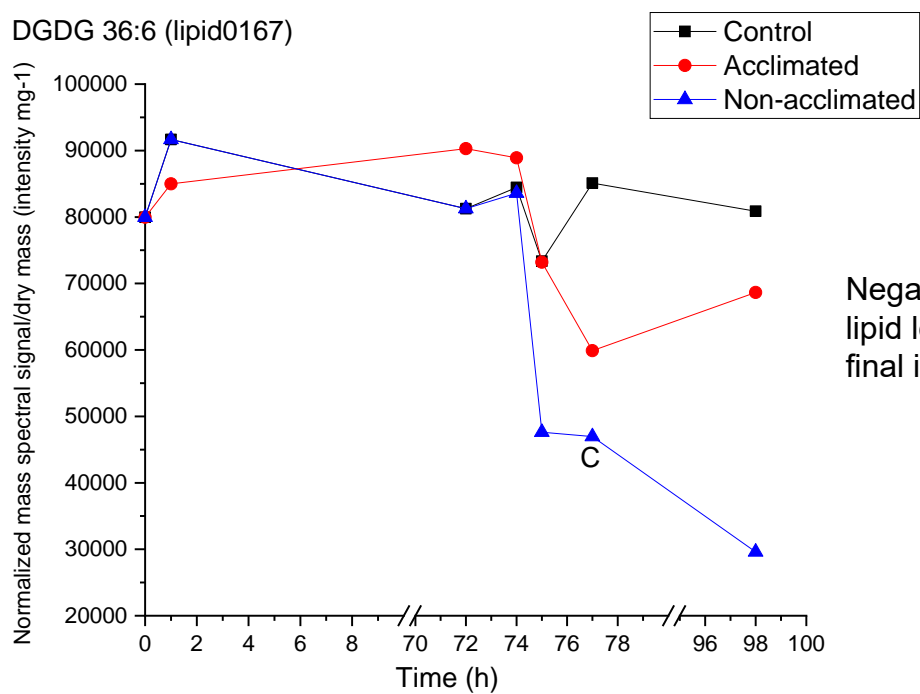

DGDG 38:5 or DGDG 36:7;O2 (lipid0174)

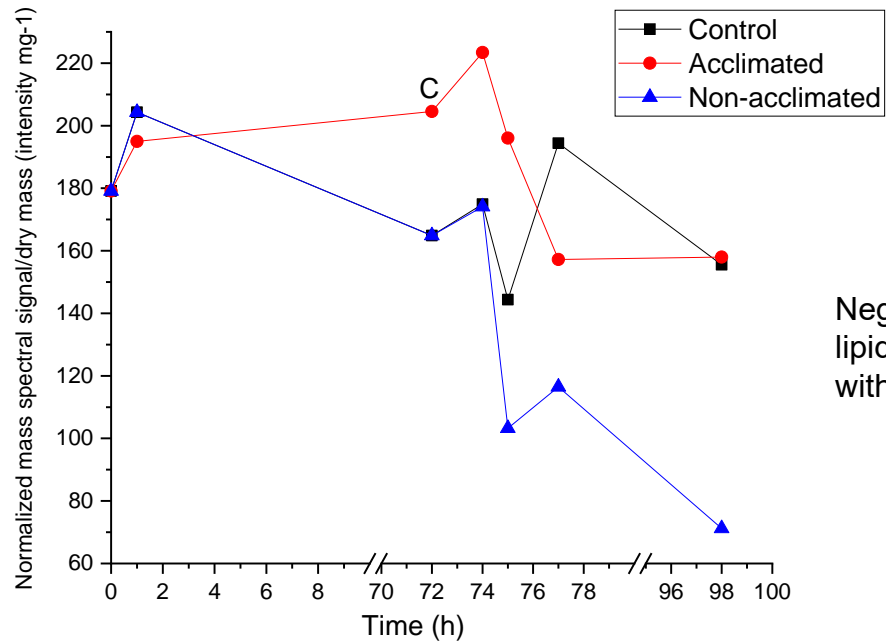

Negative correlation of lipid level at 74 and 75 h with final ion leakage

MGDG 34:3 (lipid0143)

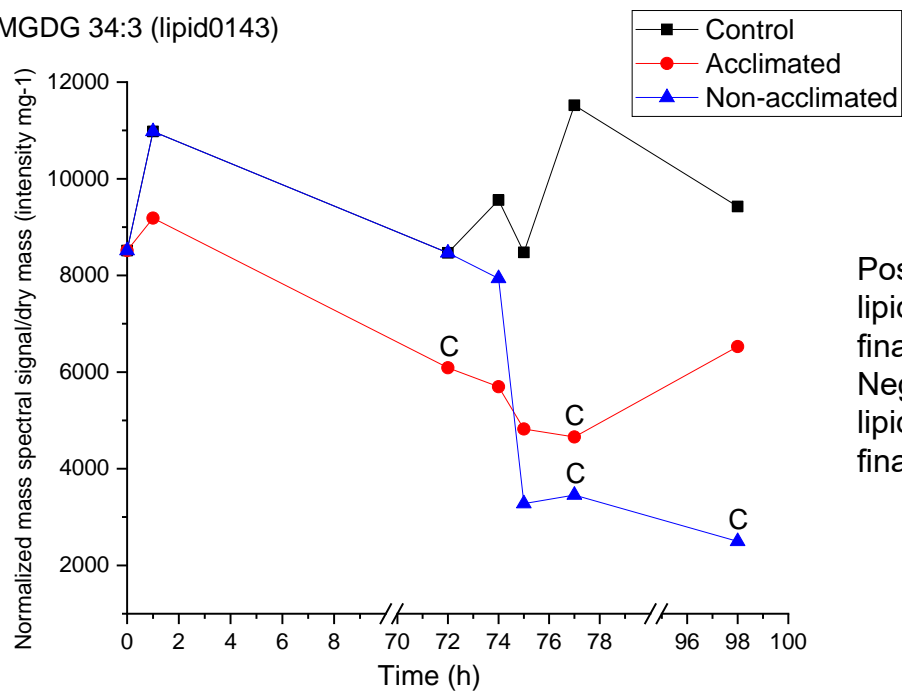

Positive correlation of lipid level at 74 h with final ion leakage.  
Negative correlation of lipid level at 75 h with final ion leakage

MGDG 34:4 (lipid0142)

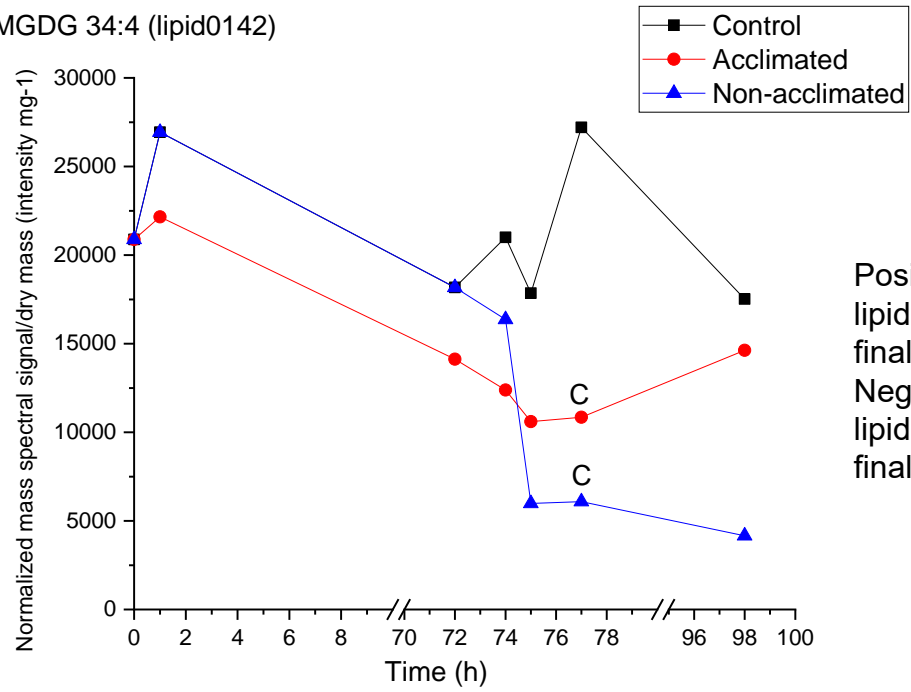

Positive correlation of lipid level at 74 h with final ion leakage.  
Negative correlation of lipid level at 75 h with final ion leakage

MGDG 34:5 (lipid0141)

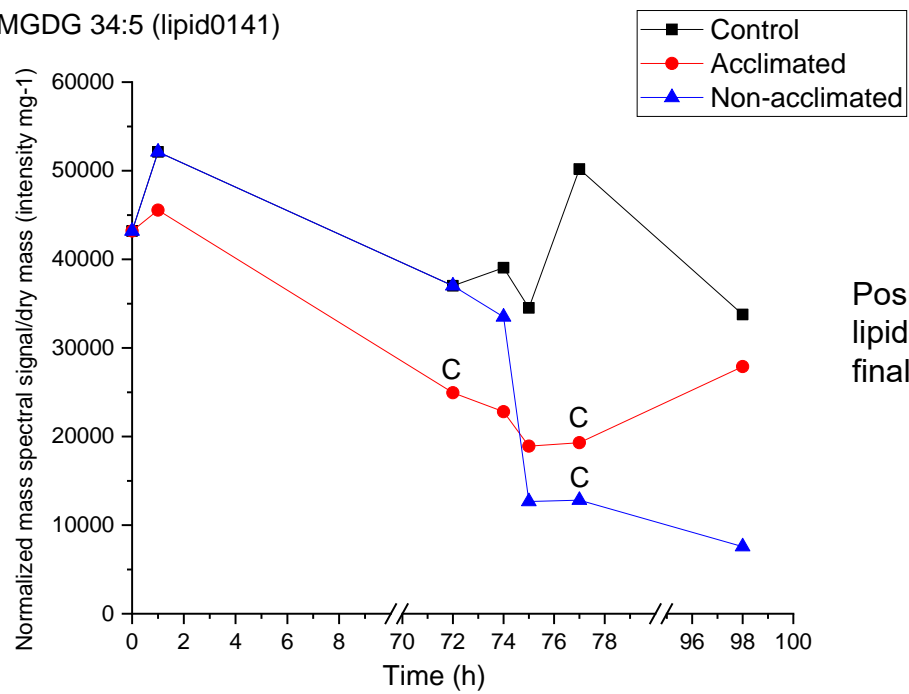

Positive correlation of lipid level at 74 h with final ion leakage



MGDG 34:6 (lipid0140)

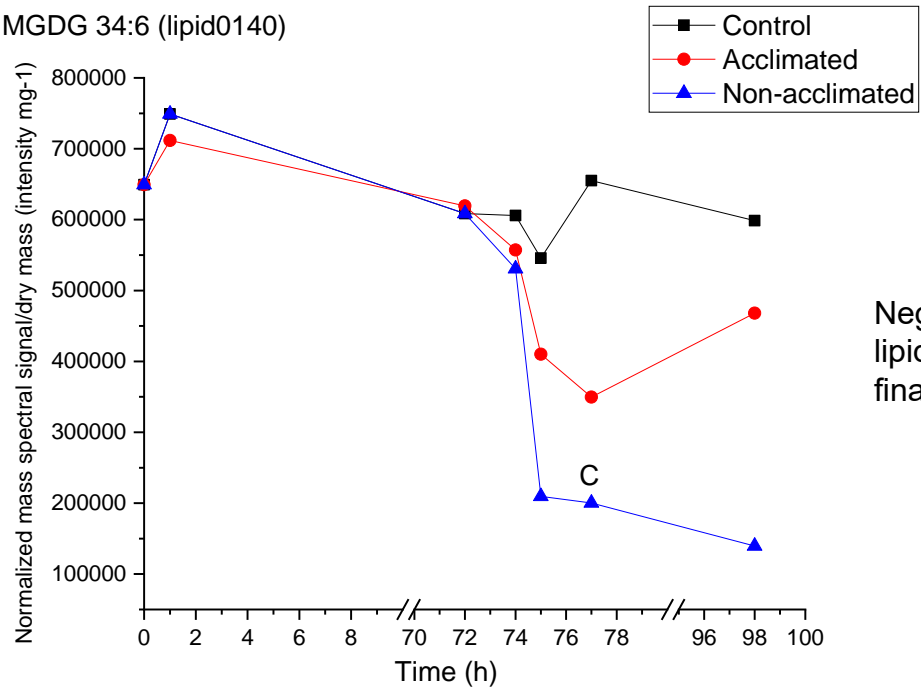

Negative correlation of lipid level at 75 h with final ion leakage

MGDG 35:3 (lipid0808)

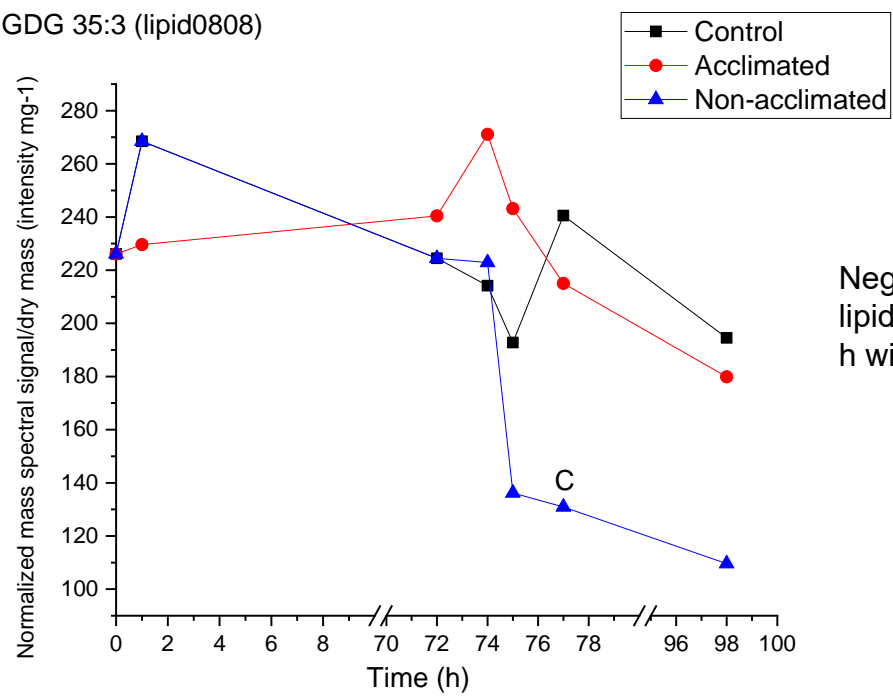

Negative correlation of lipid level at 74 and 75 h with final ion leakage

MGDG 36:3 (lipid0149)

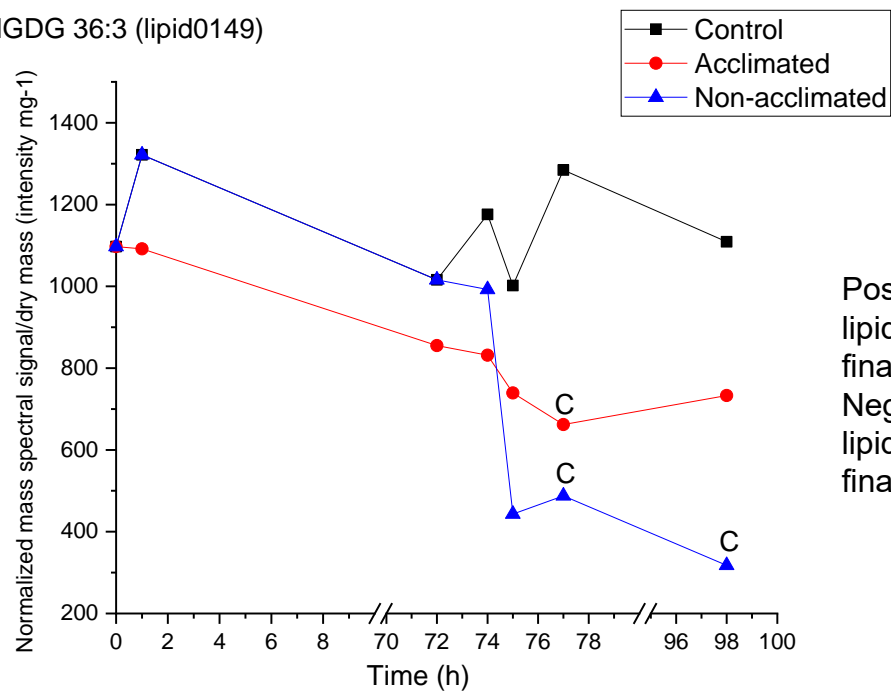

Positive correlation of lipid level at 74 h with final ion leakage  
Negative correlation of lipid level at 75 h with final ion leakage

MGDG 36:4 or MGDG 34:6;O2 (lipid0148)

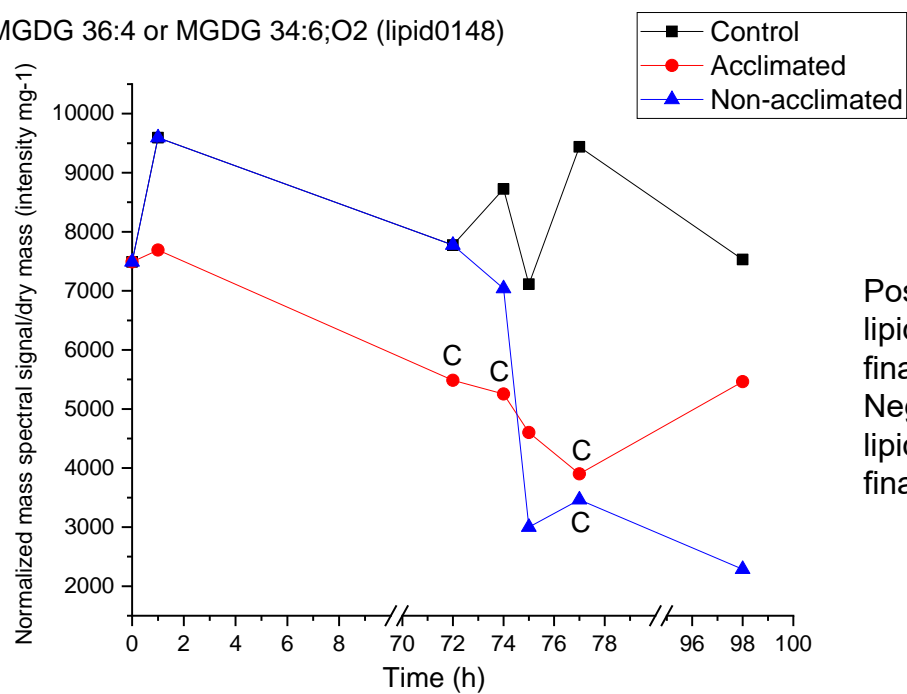

Positive correlation of lipid level at 74 h with final ion leakage  
Negative correlation of lipid level at 75 h with final ion leakage

MGDG 36:5 or MGDG 34:7;O2 (lipid0147)

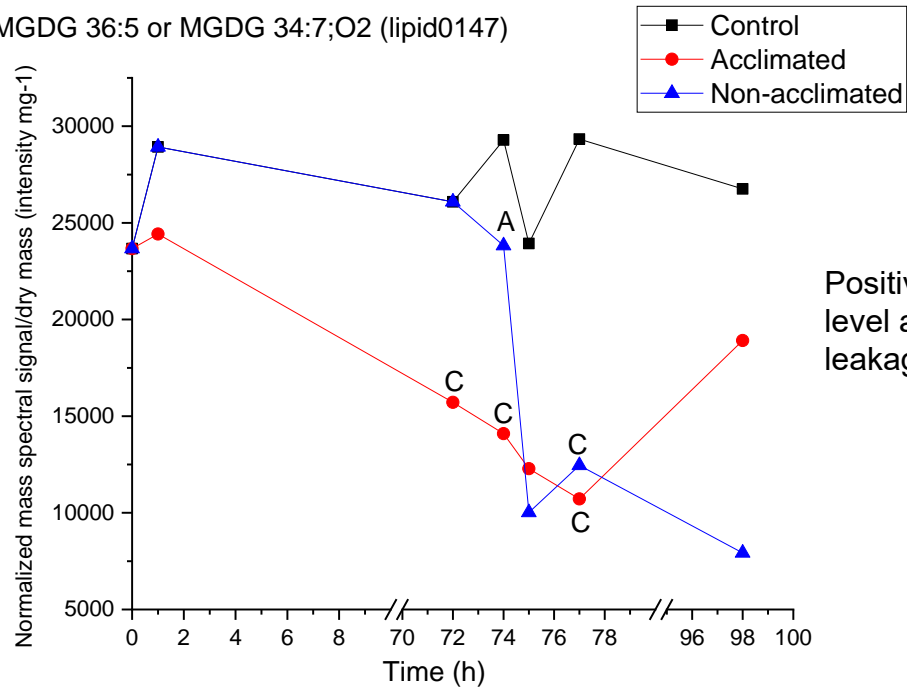

Positive correlation of lipid level at 74 h with final ion leakage

MGDG 36:6 or MGDG 34:8;O2 (lipid0146)

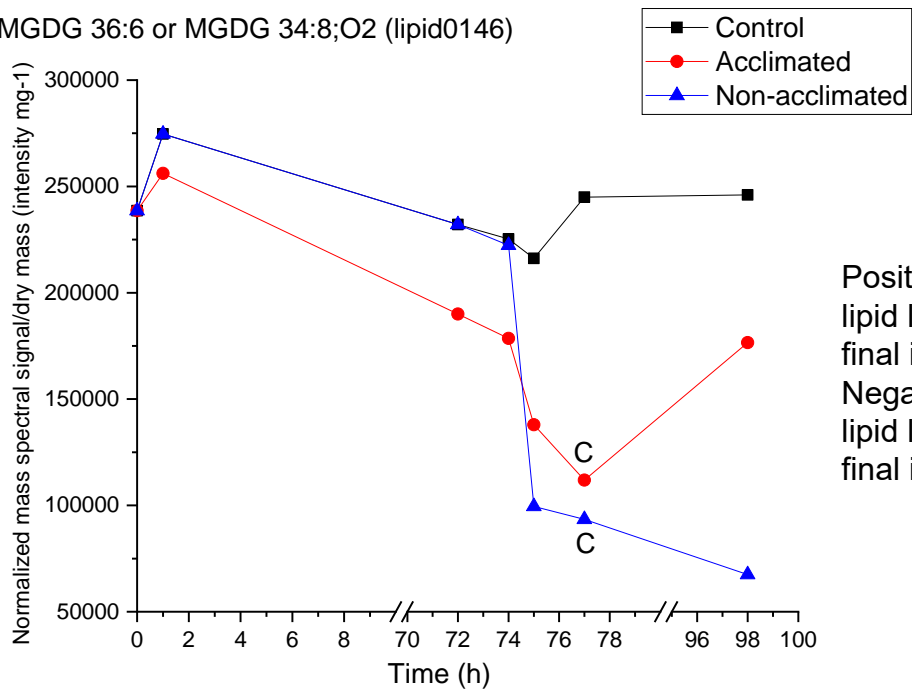

Positive correlation of lipid level at 74 h with final ion leakage  
Negative correlation of lipid level at 75 h with final ion leakage

MGDG 38:5 or MGDG 36:7;O2 (lipid0153)

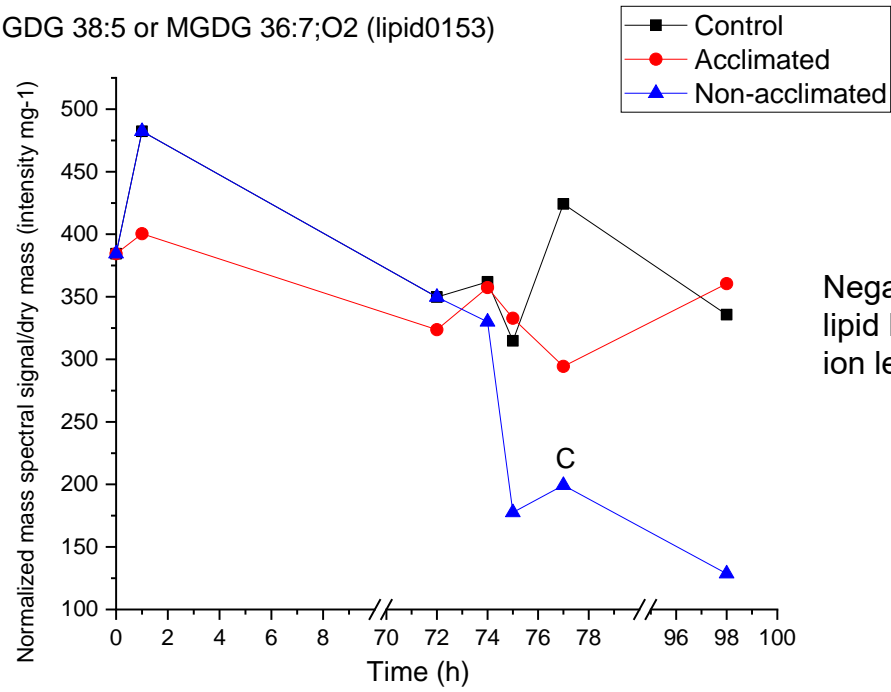

Negative correlation of lipid level at 75 h with final ion leakage

PG 32:0 (lipid0008)

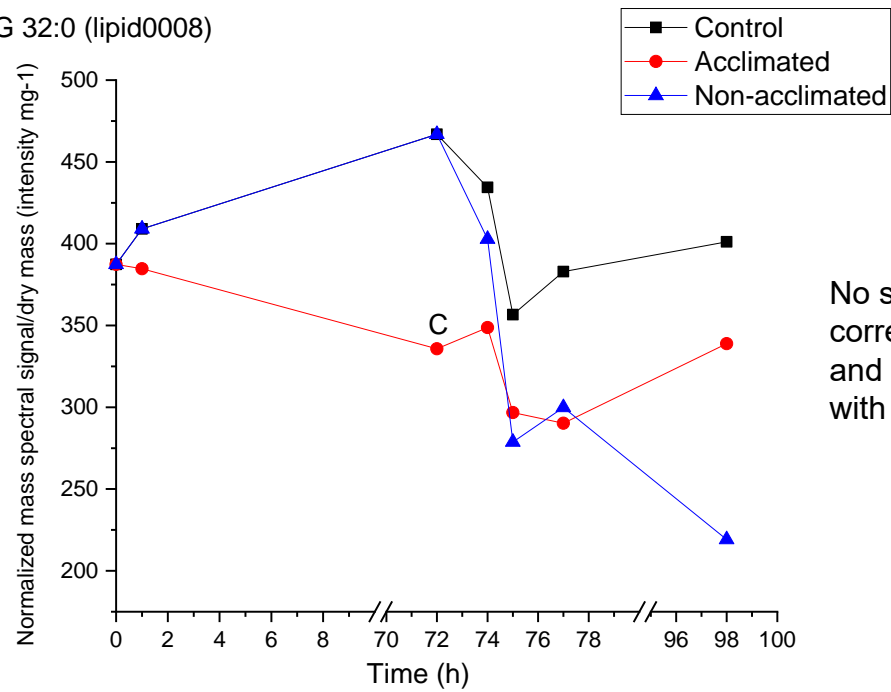

No significant correlation of 74, 75, and 77 h lipid levels with final ion leakage

PG 32:1 (lipid0007)

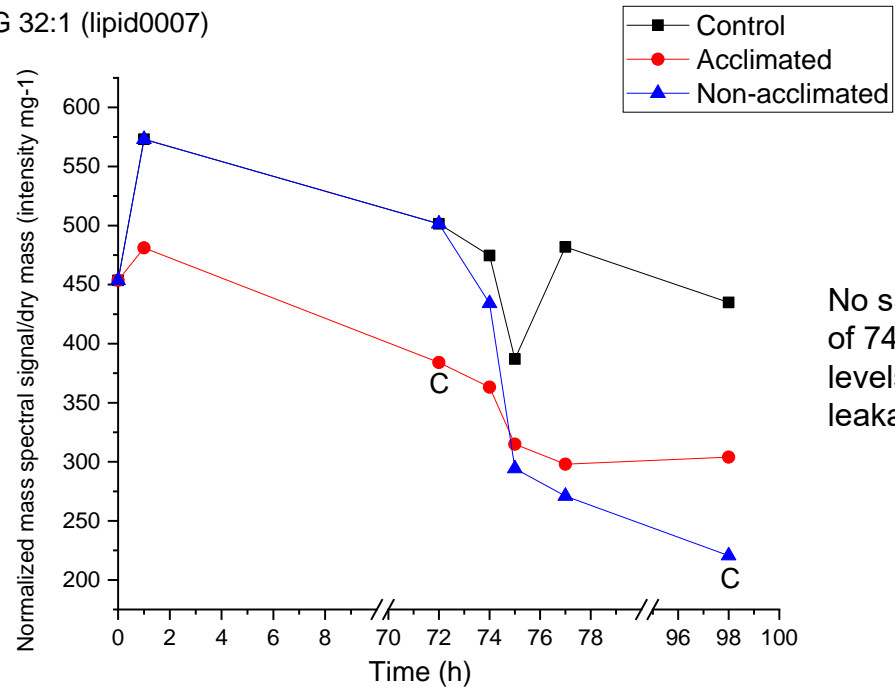

PG 34:1 (lipid0012)

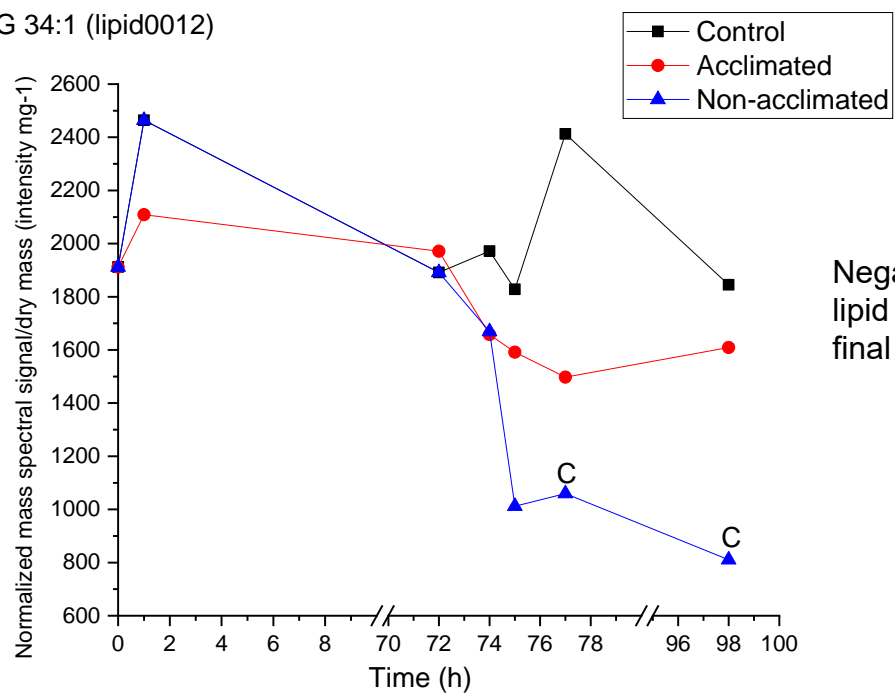

PG 34:2 (lipid0011)

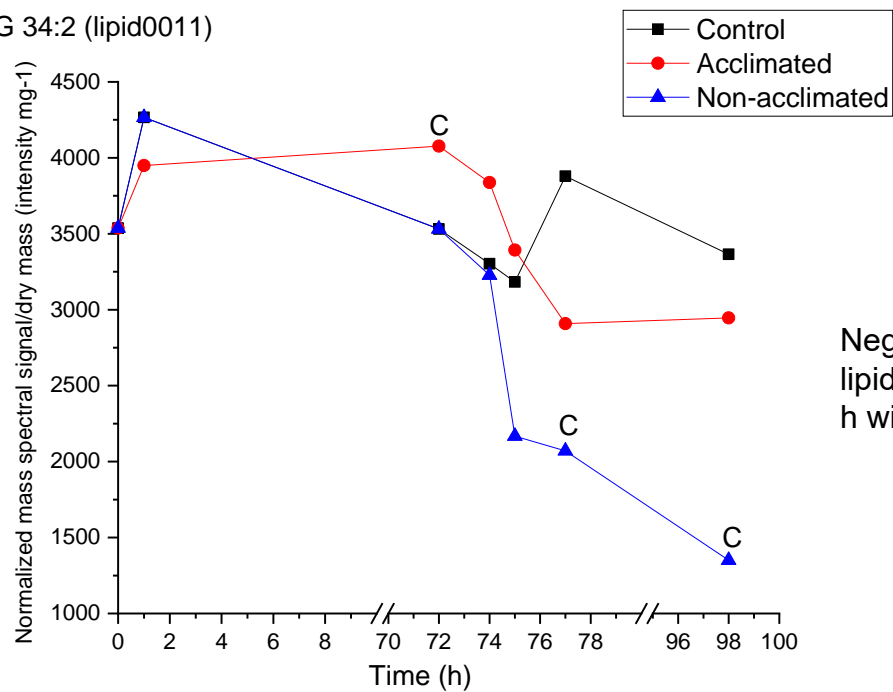

Negative correlation of lipid level at 74 and 75 h with final ion leakage

PG 34:3 (lipid0010)

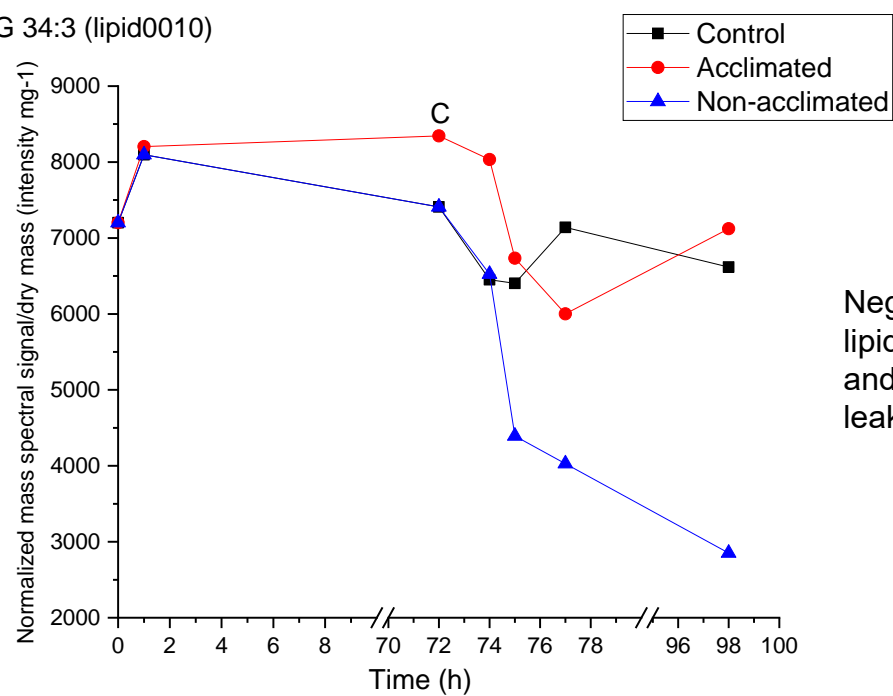

Negative correlation of lipid level at 74, 75, and 77 h with final ion leakage

PG 34:4 (lipid0009)

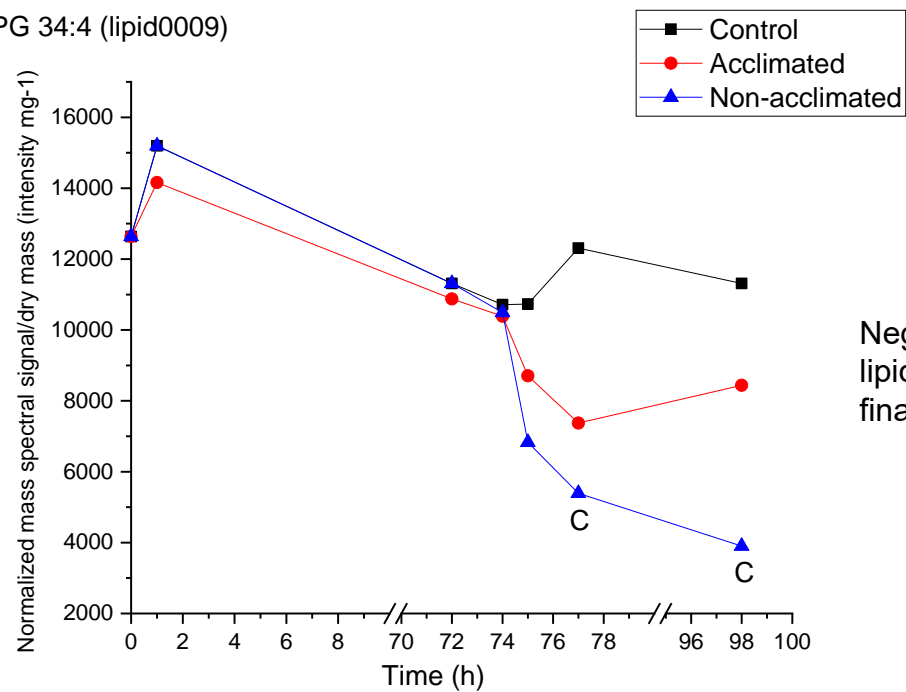

Negative correlation of lipid level at 75 h with final ion leakage

PG 36:2 (lipid0018)

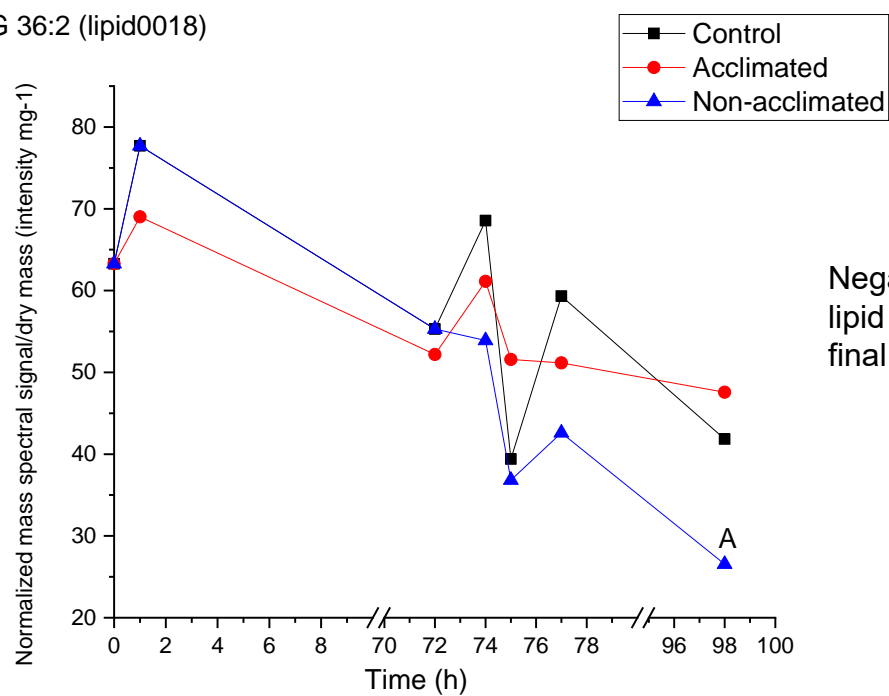

Negative correlation of lipid level at 75 h with final ion leakage

PG 36:3 (lipid0017)

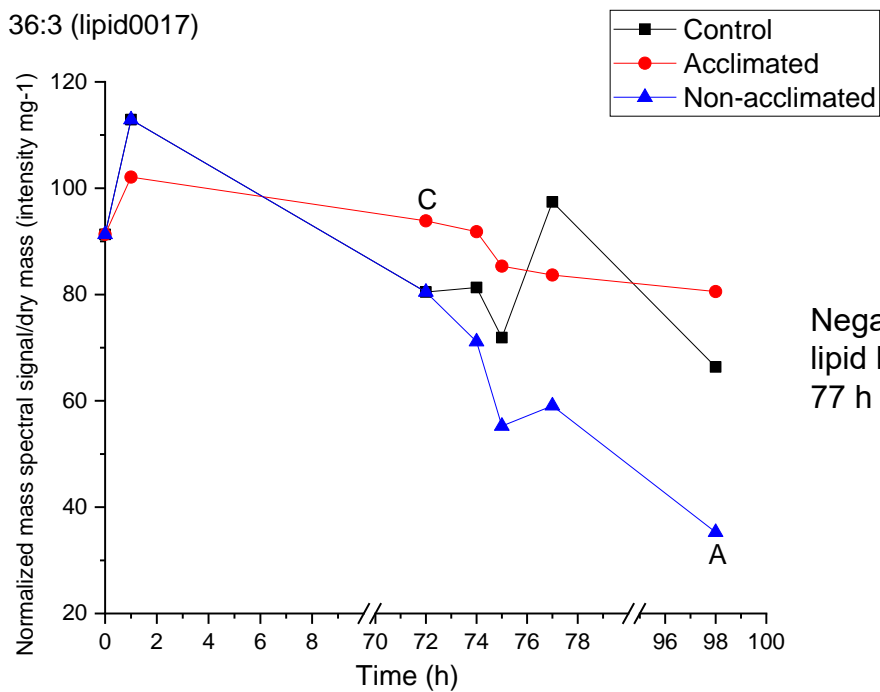

Negative correlation of lipid level at 74, 75, and 77 h with final ion leakage

PG 36:4 (lipid0016)

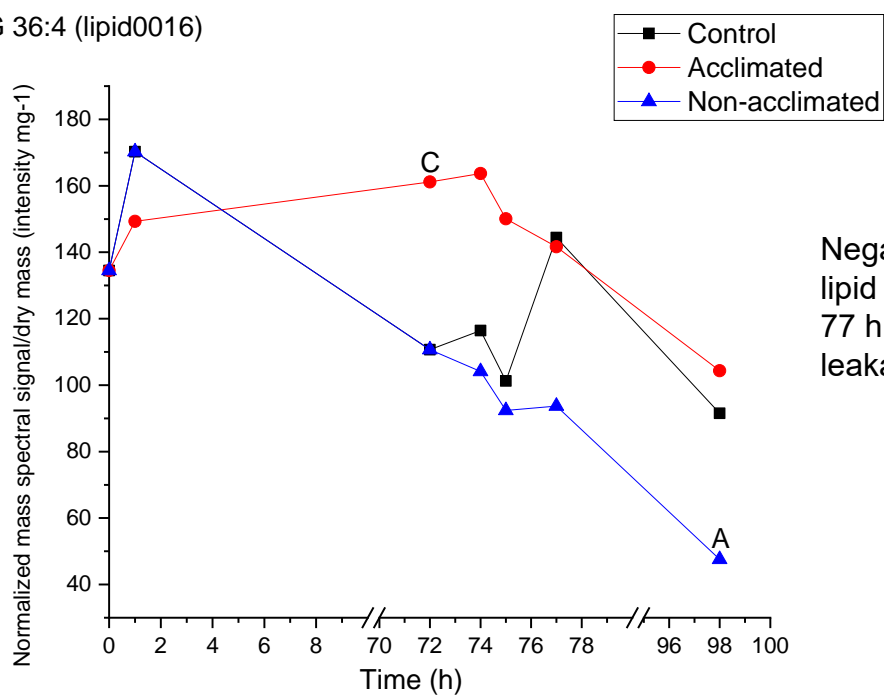

Negative correlation of lipid level at 74, 75, and 77 h with final ion leakage



PG 36:5 (lipid0015)

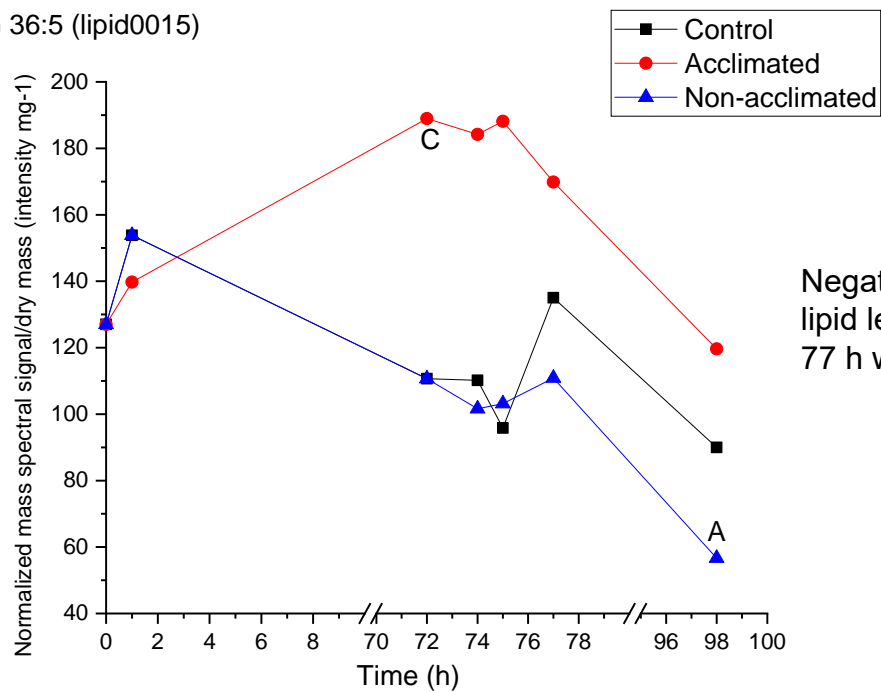

Negative correlation of lipid level at 74, 75, and 77 h with final ion leakage

PG 36:6 (lipid0014)

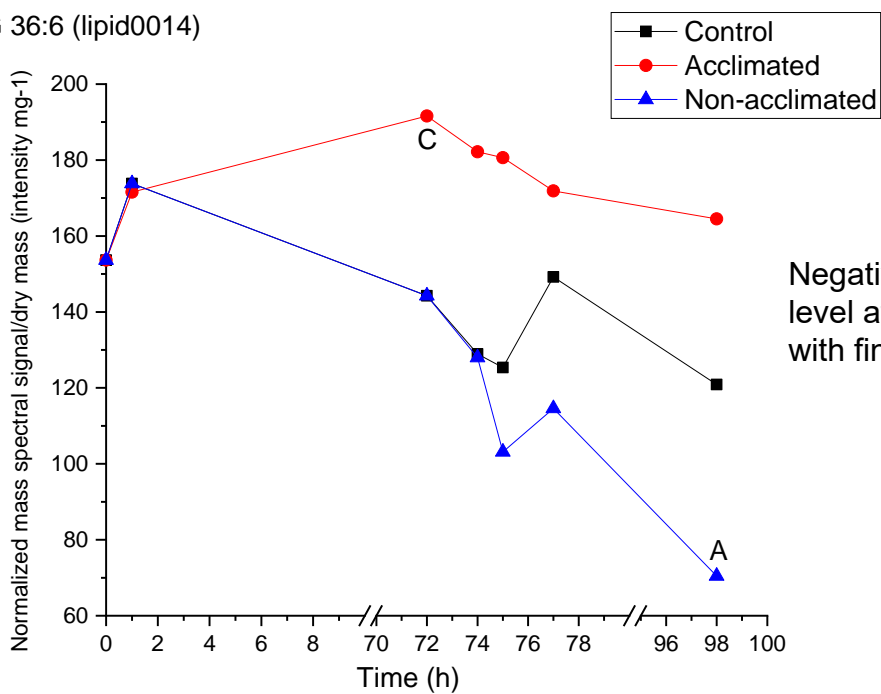

Negative correlation of lipid level at 74, 75, and 77 h with final ion leakage

PC 32:1 (lipid0841)

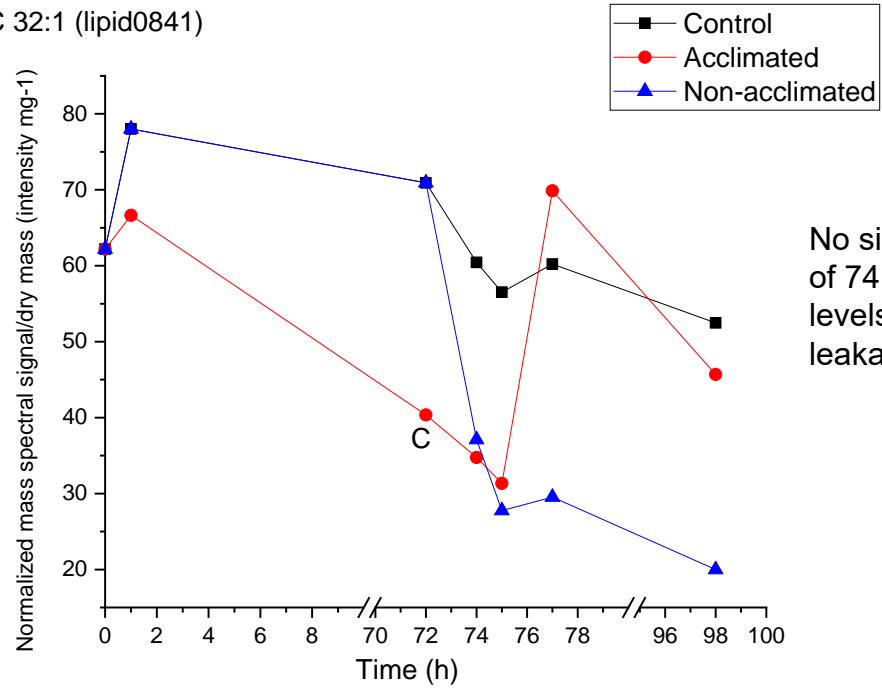

PC 32:3 (lipid0840)

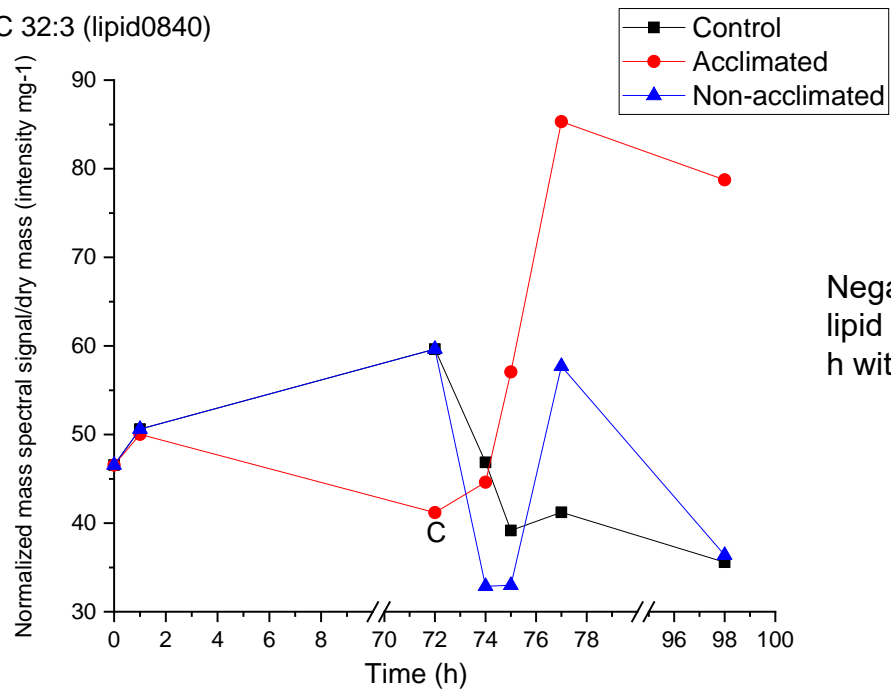

PC 34:1 (lipid0035)

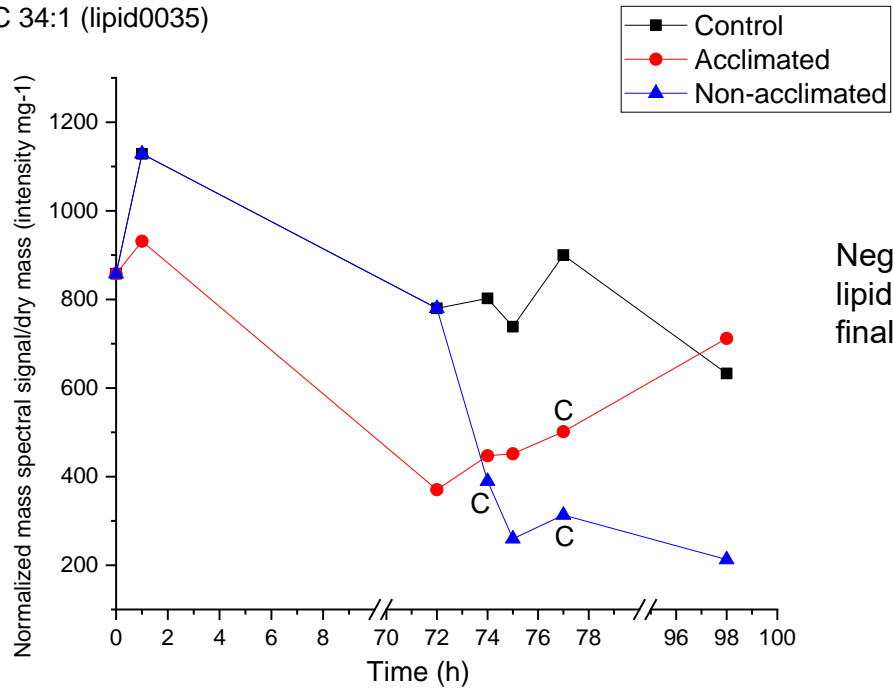

PC 34:2 (lipid0034)

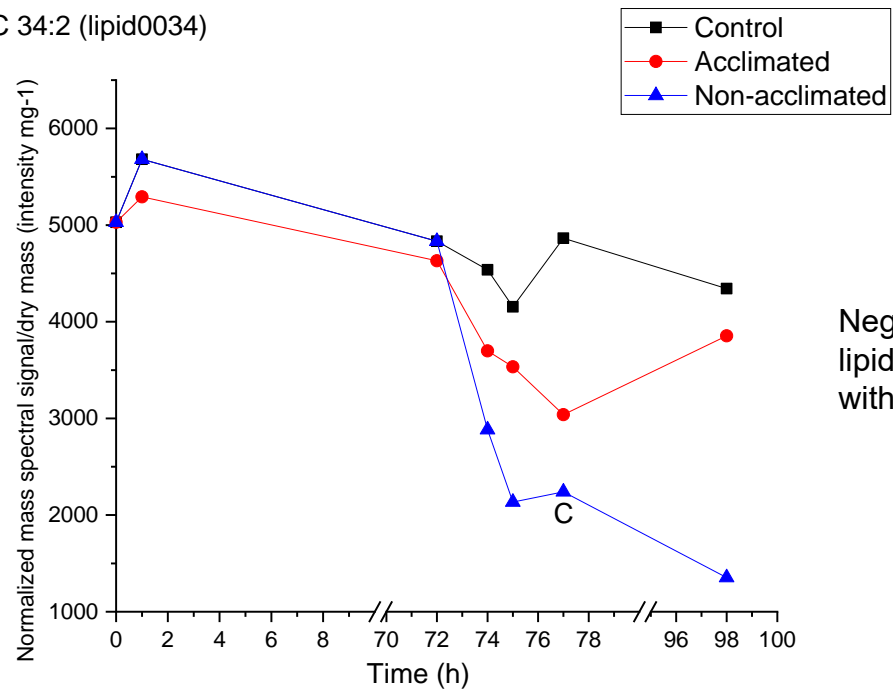

PC 34:6 (lipid0842)

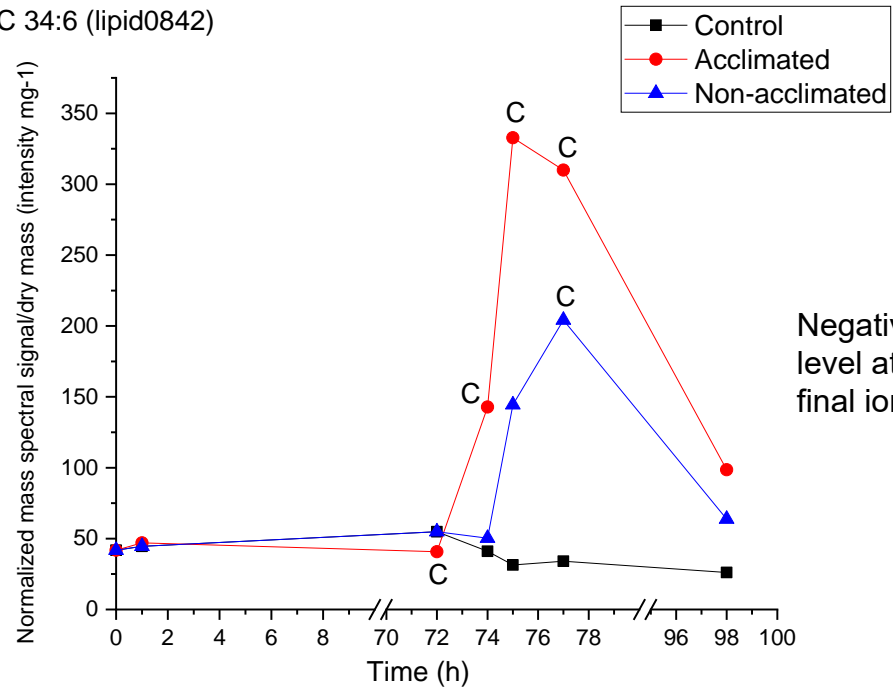

Negative correlation of lipid level at 74 and 75 h with final ion leakage

PC 36:2 (lipid0040)

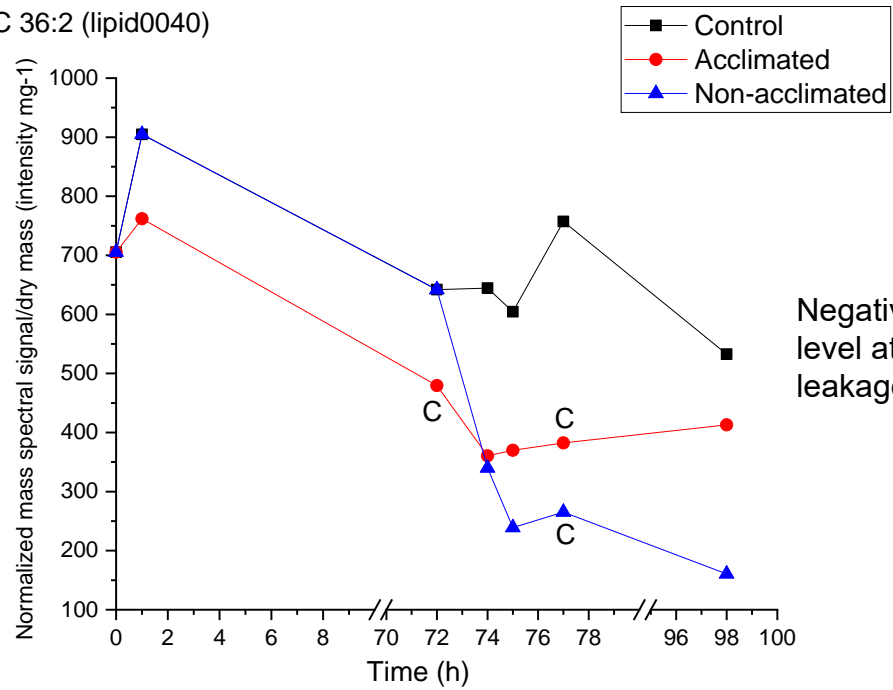

Negative correlation of lipid level at 75 h with final ion leakage

PC 36:3 (lipid0039)

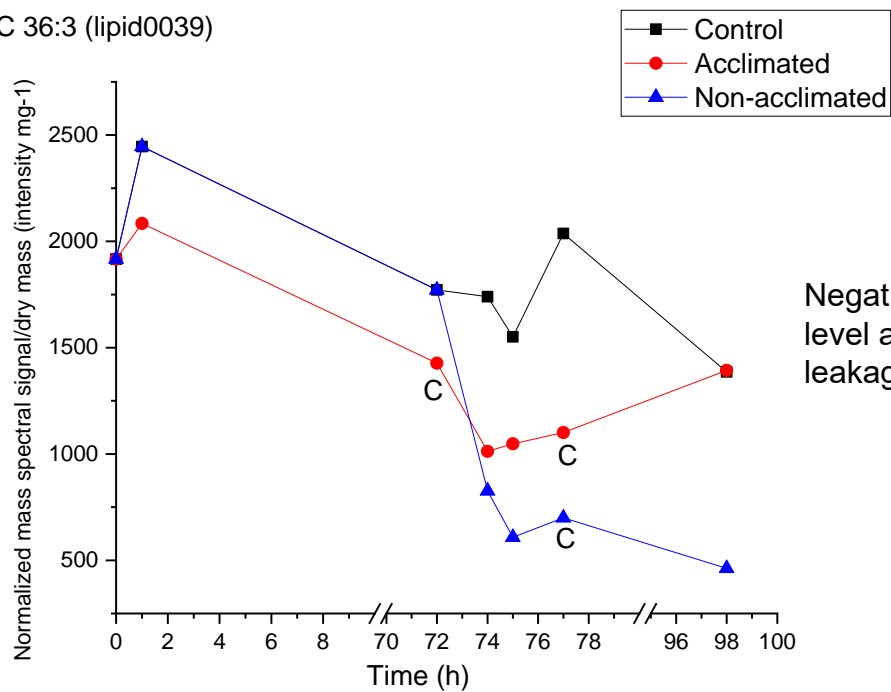

PC 36:4 (lipid0038)

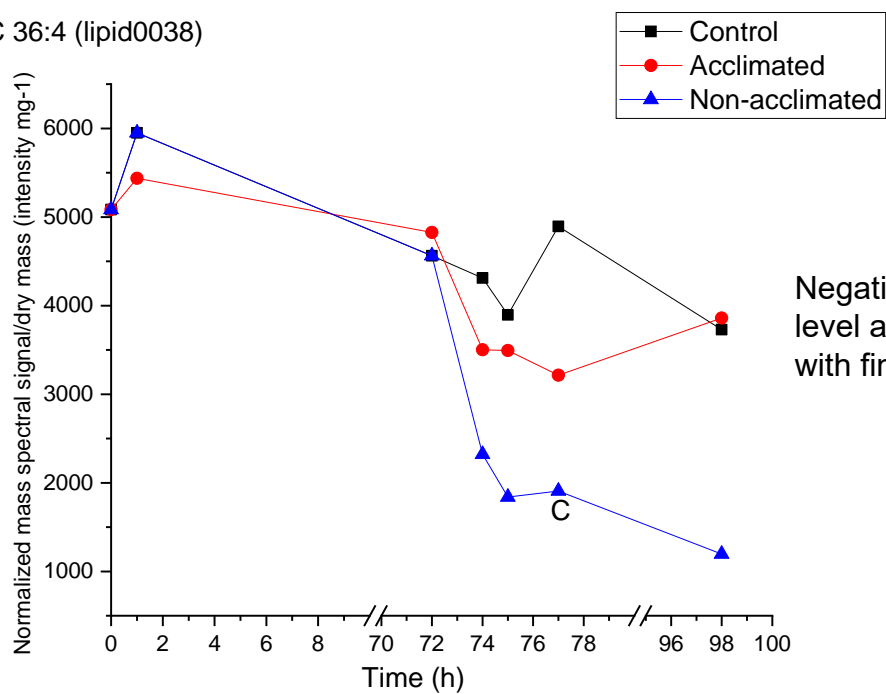

PC 36:5 (lipid0037)

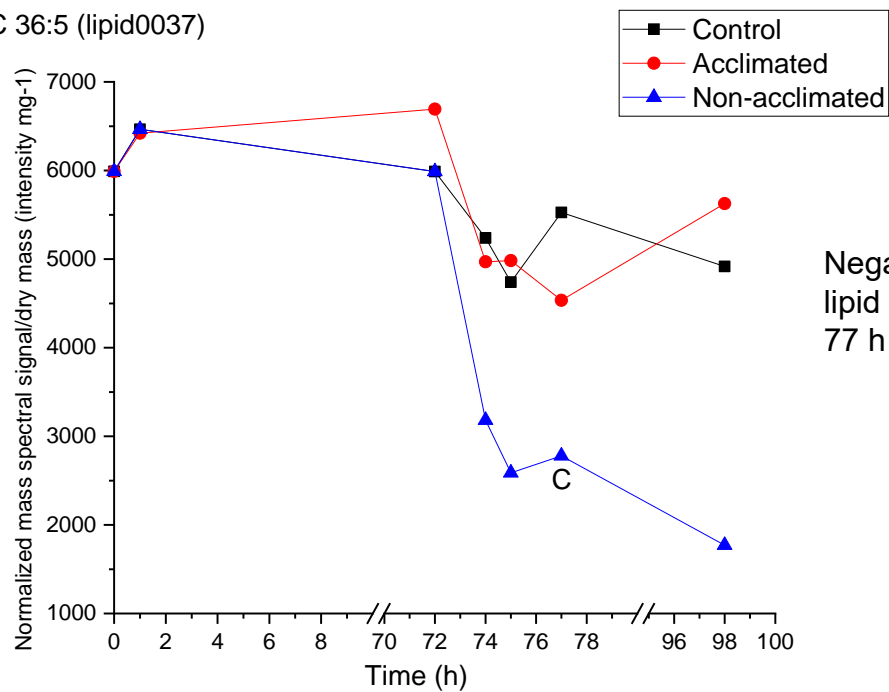

Negative correlation of lipid level at 74, 75, and 77 h with final ion leakage

PC 38:2 (lipid0046)

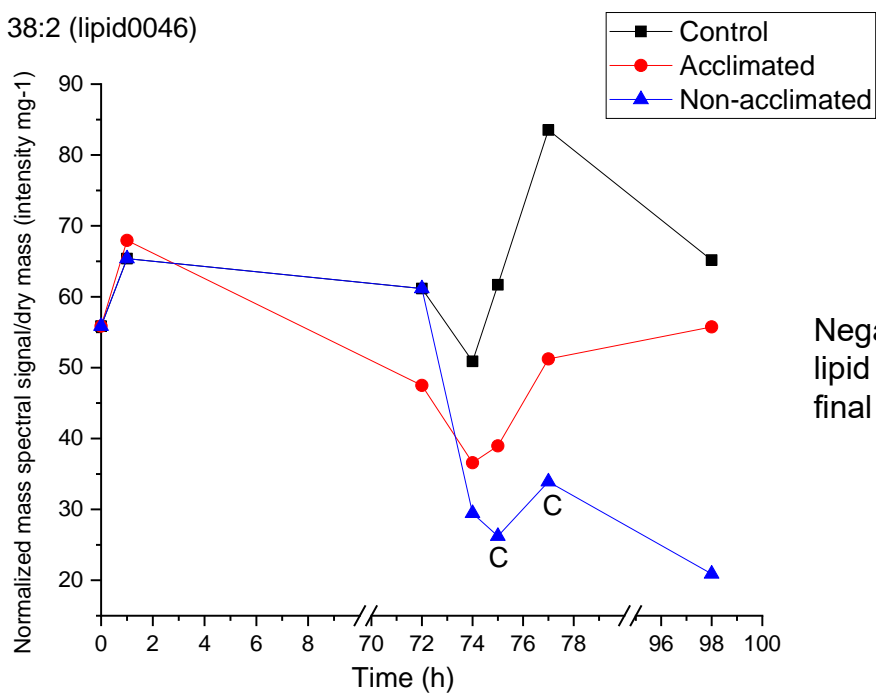

Negative correlation of lipid level at 75 h with final ion leakage

PC 38:3 (lipid0045)

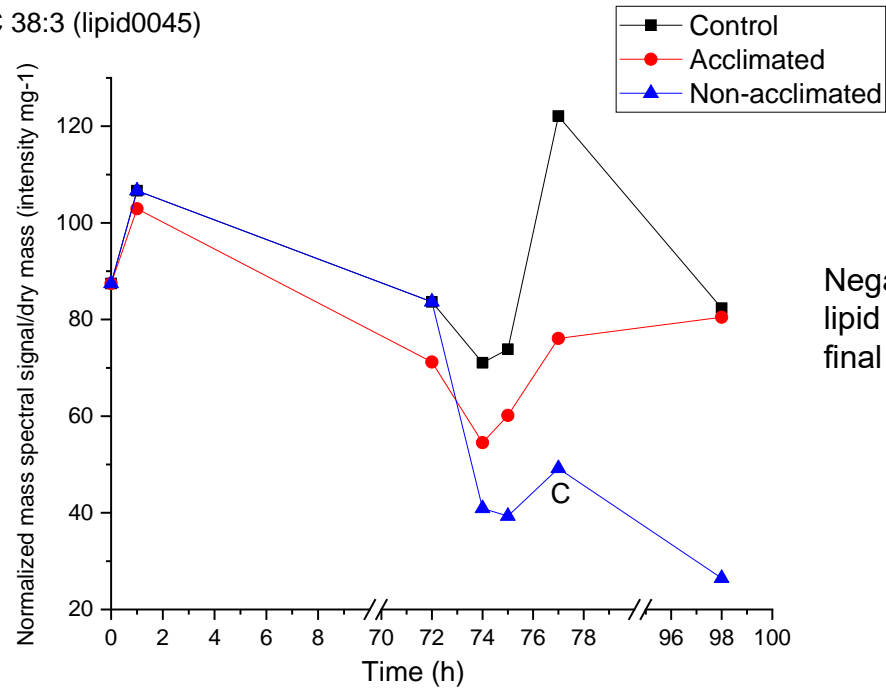

PC 38:4 (lipid0044)

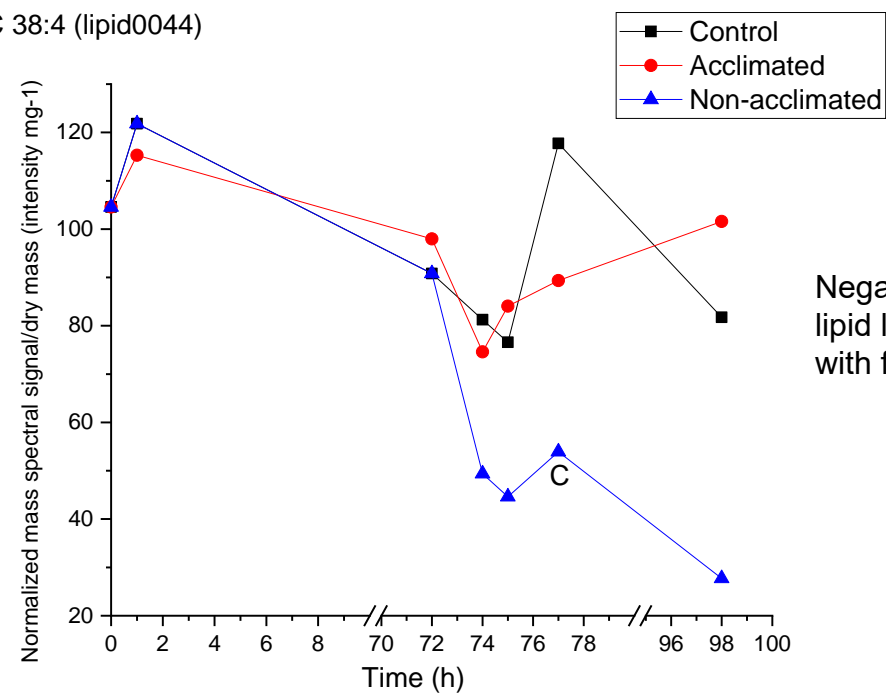

PC 38:5 (lipid0043)

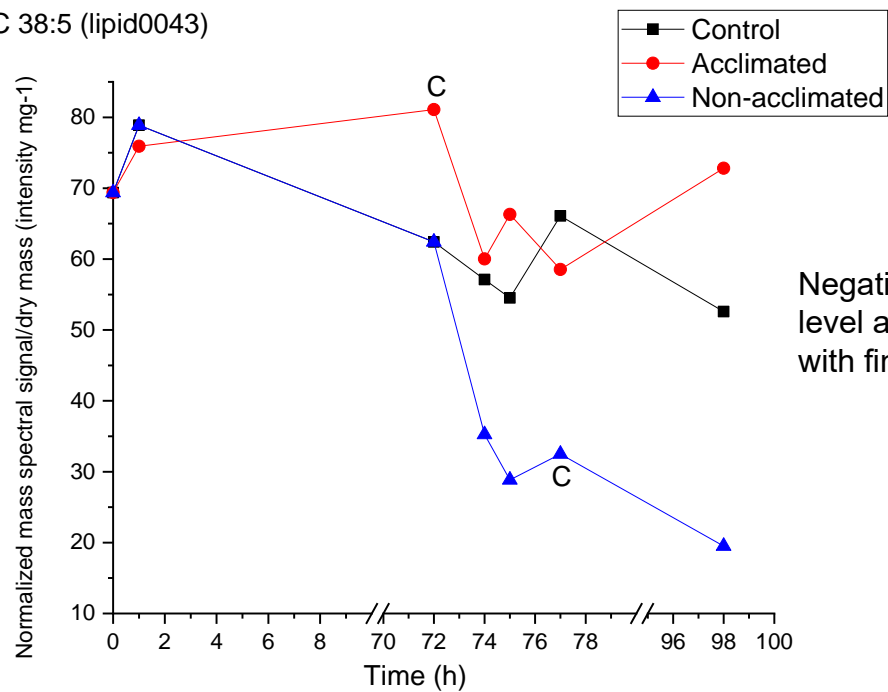

Negative correlation of lipid level at 74, 75, and 77 h with final ion leakage

PC 38:6 (lipid0042)

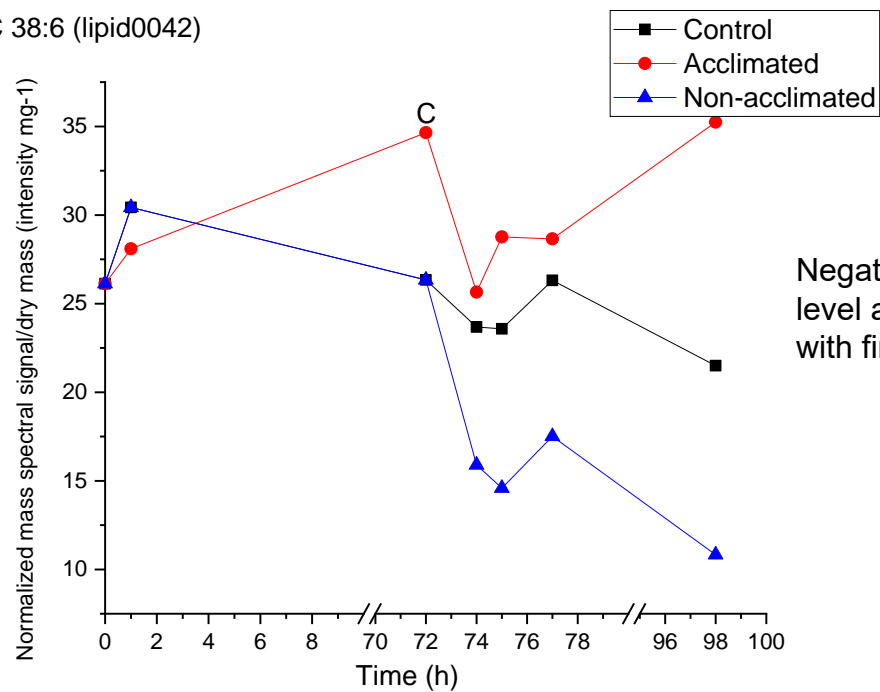

Negative correlation of lipid level at 74, 75, and 77 h with final ion leakage



PC 40:2\* (lipid0050)

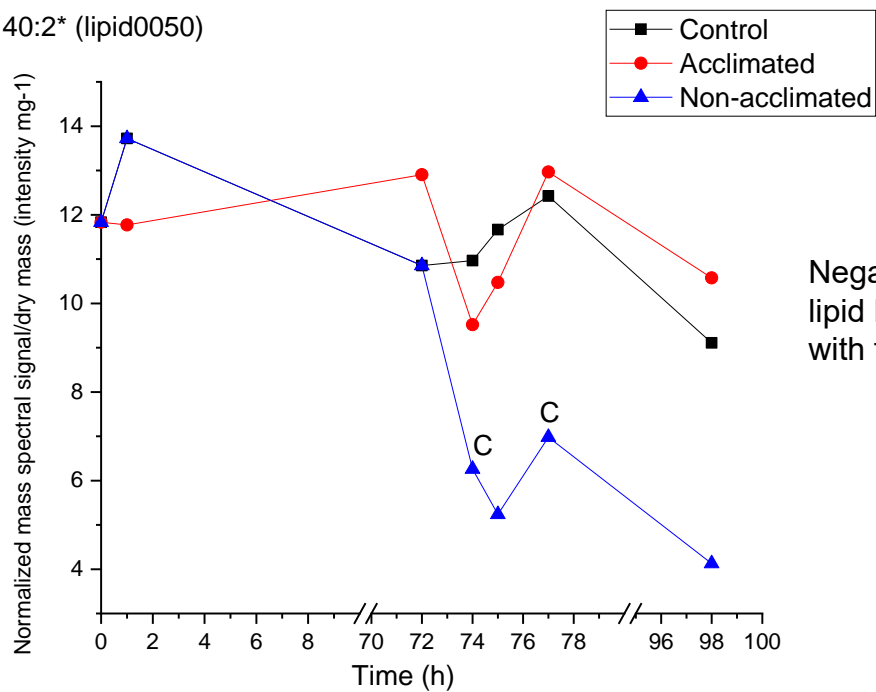

PC 40:3\* (lipid0049)

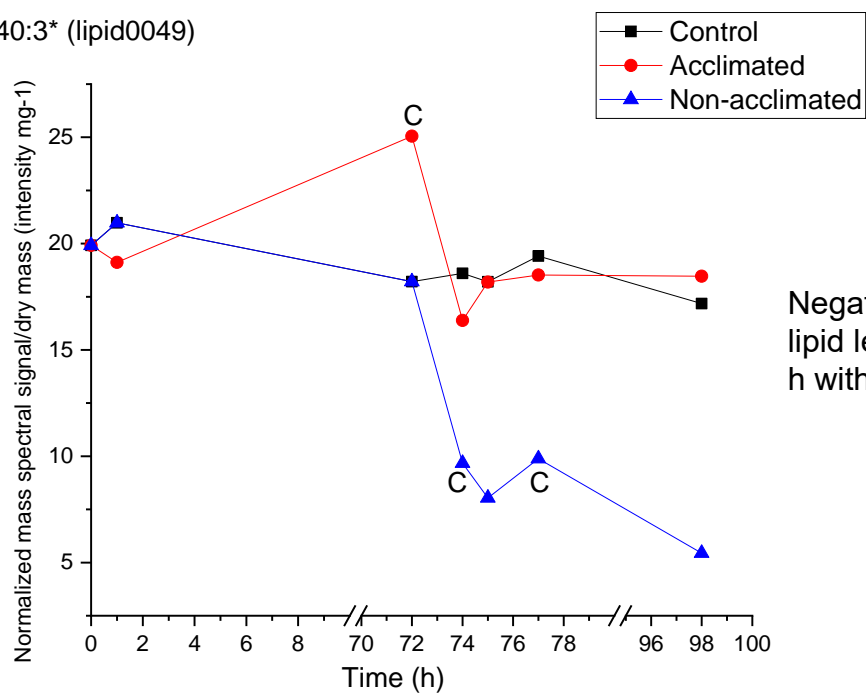

PC 40:4\* (lipid0048)

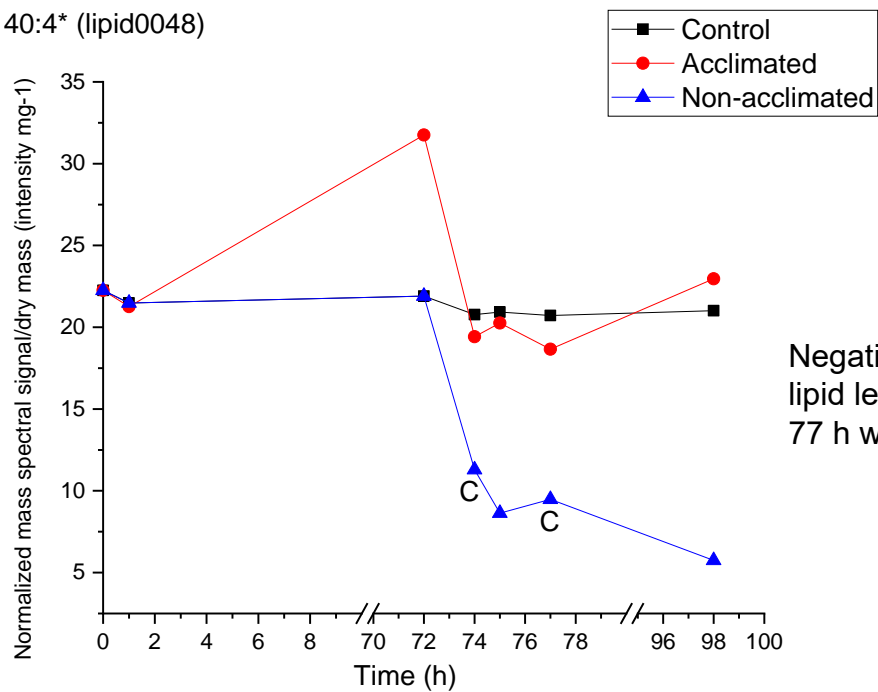

Negative correlation of lipid level at 74, 75, and 77 h with final ion leakage

PC 40:5\* (lipid0047)

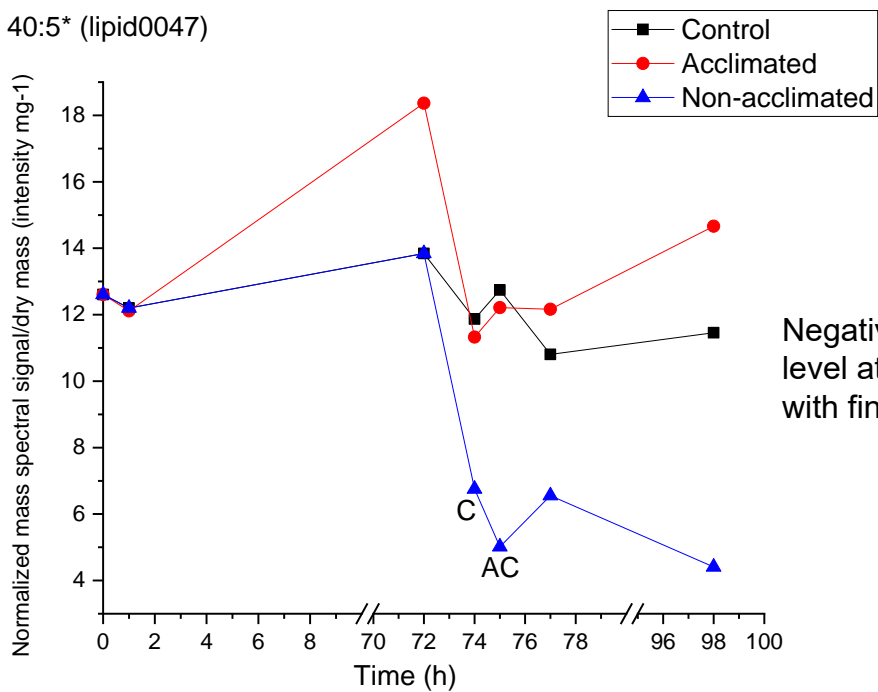

Negative correlation of lipid level at 74, 75, and 77 h with final ion leakage

PE 34:2 (lipid0063)

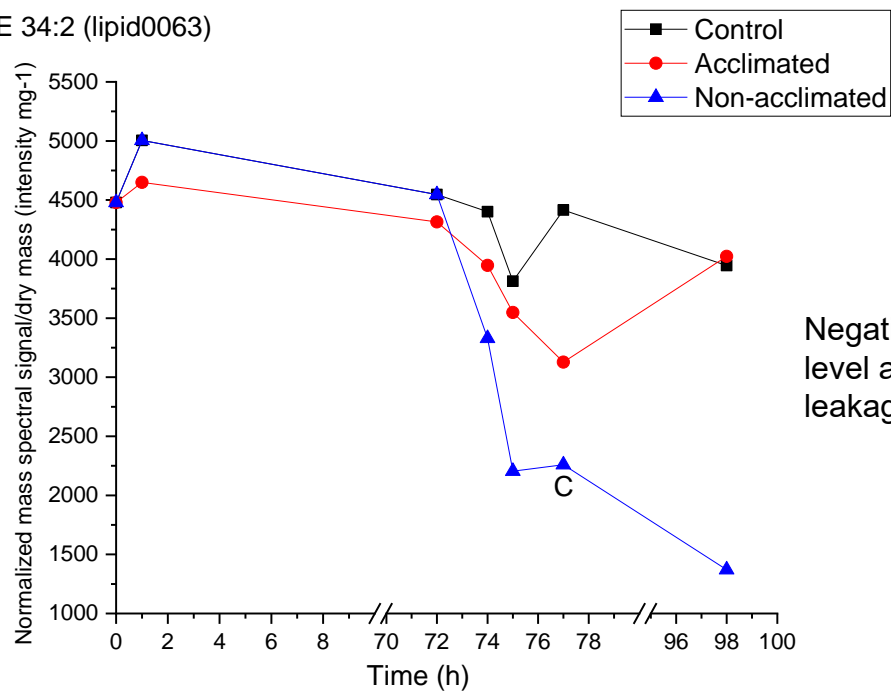

PE 34:3 (lipid0062)

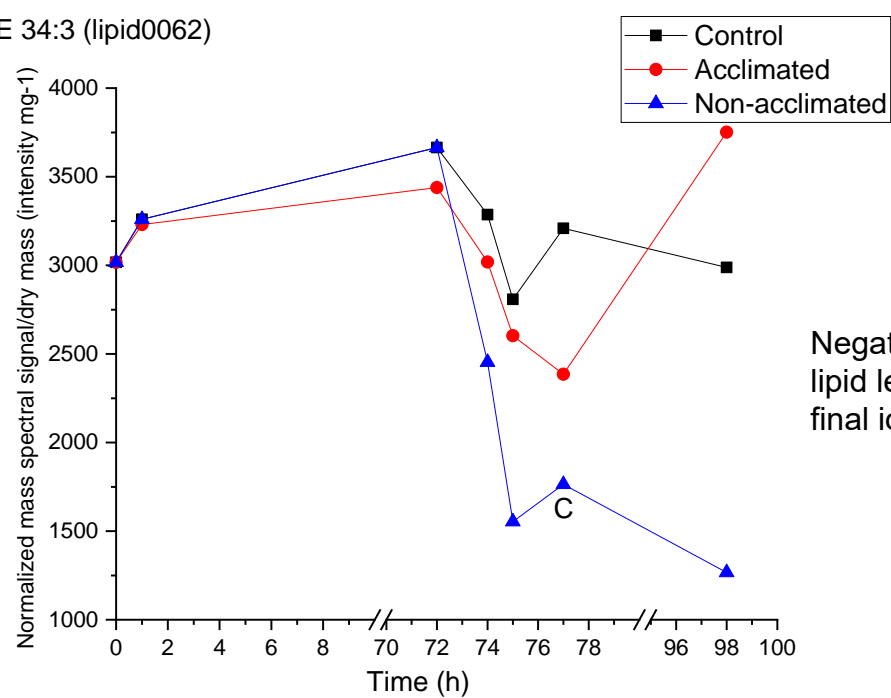

PE 36:2 (lipid0069)

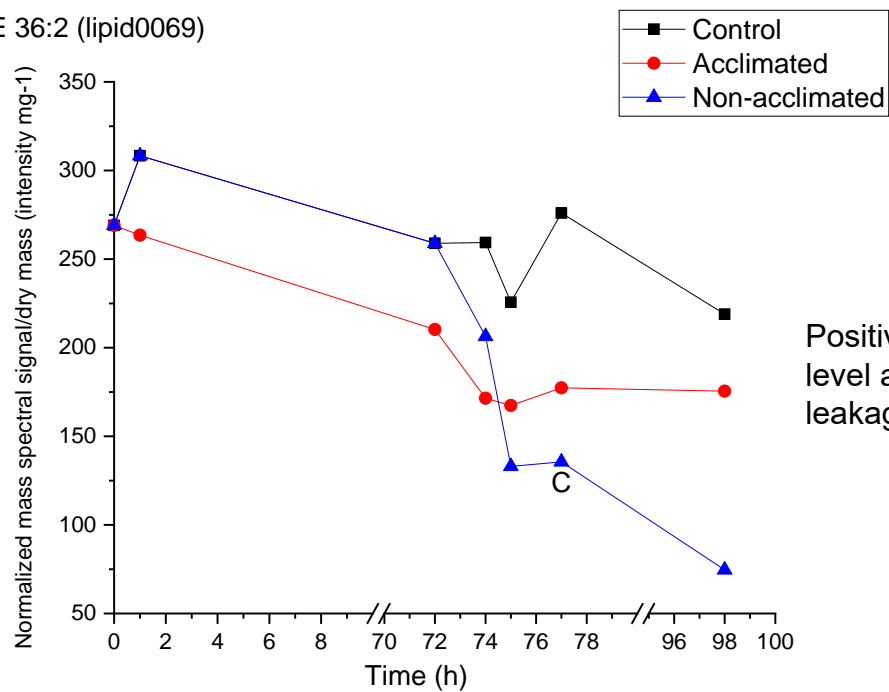

PE 36:3 (lipid0068)

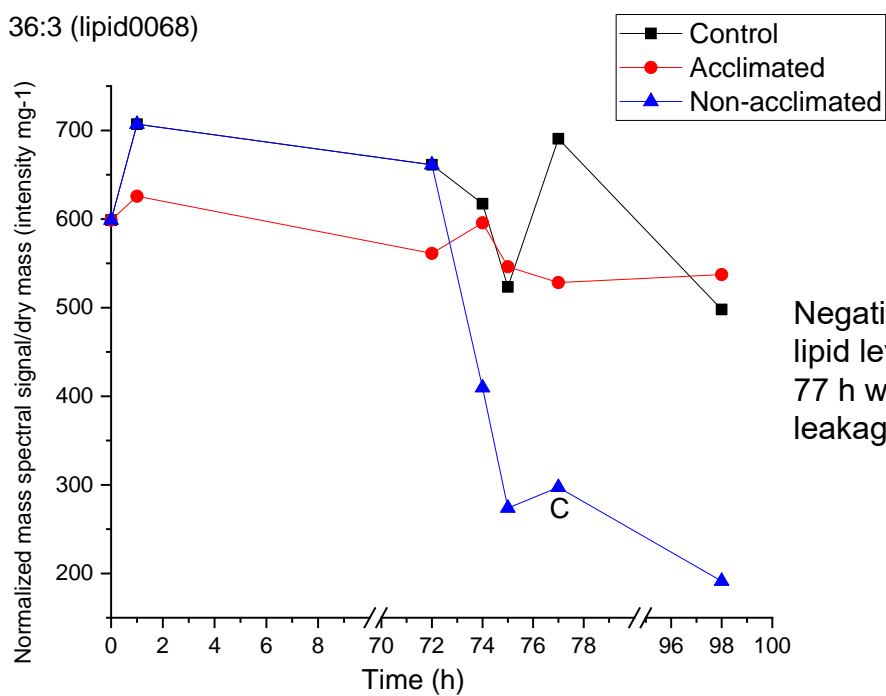

PE 36:4 (lipid0067)

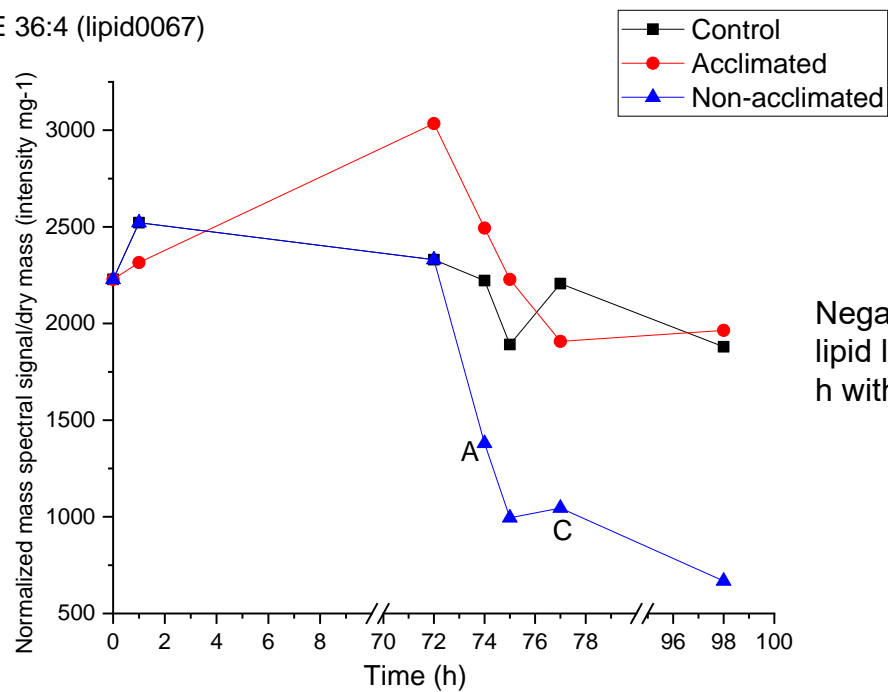

PE 36:5 (lipid0066)

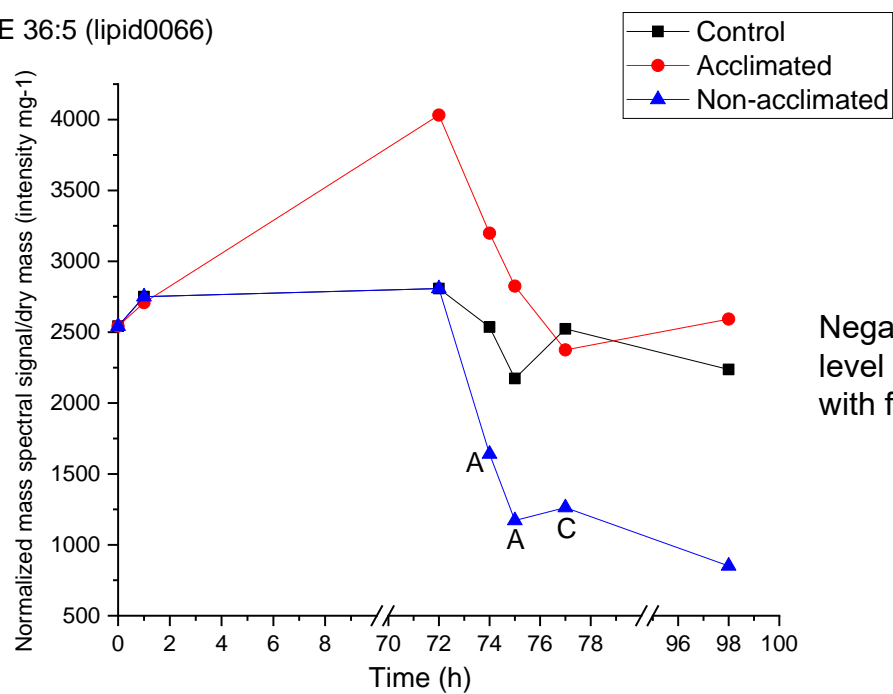

PE 36:6 (lipid0065)

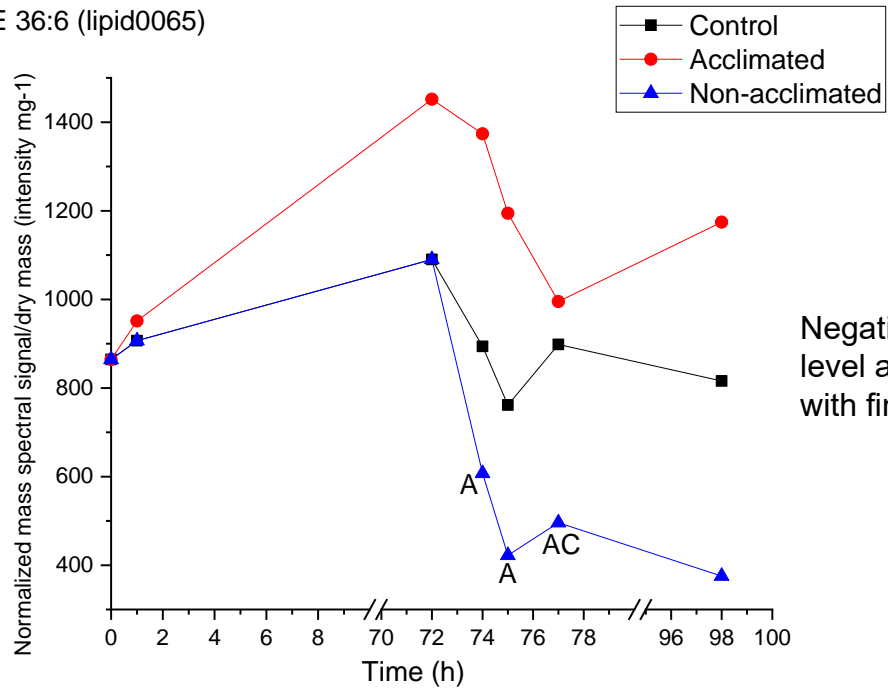

Negative correlation of lipid level at 74, 75, and 77 h with final ion leakage

PE 38:4 (lipid0073)

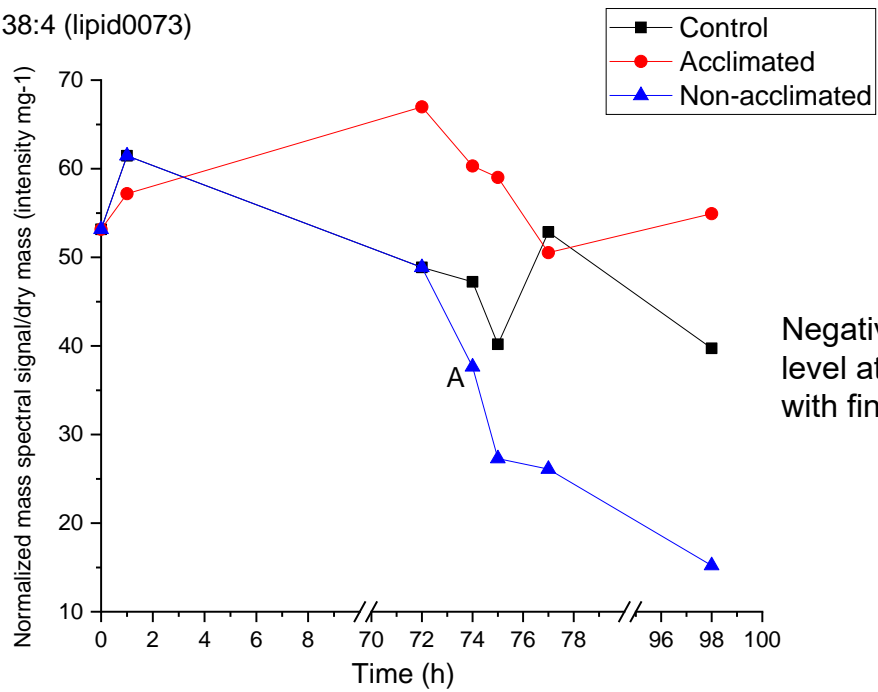

Negative correlation of lipid level at 74, 75, and 77 h with final ion leakage

PE 38:5 (lipid0072)

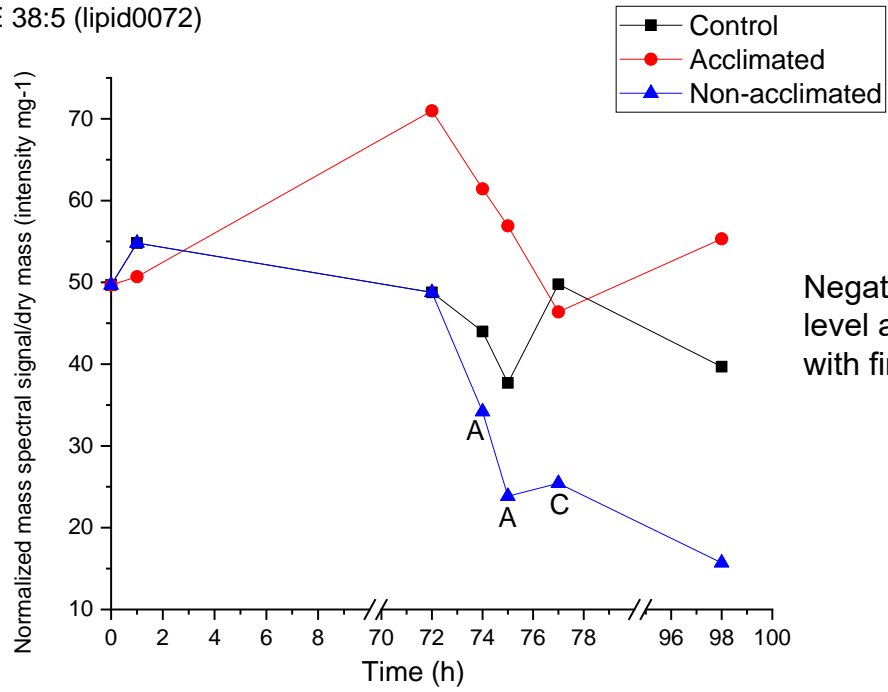

PE 40:3 (lipid0075)

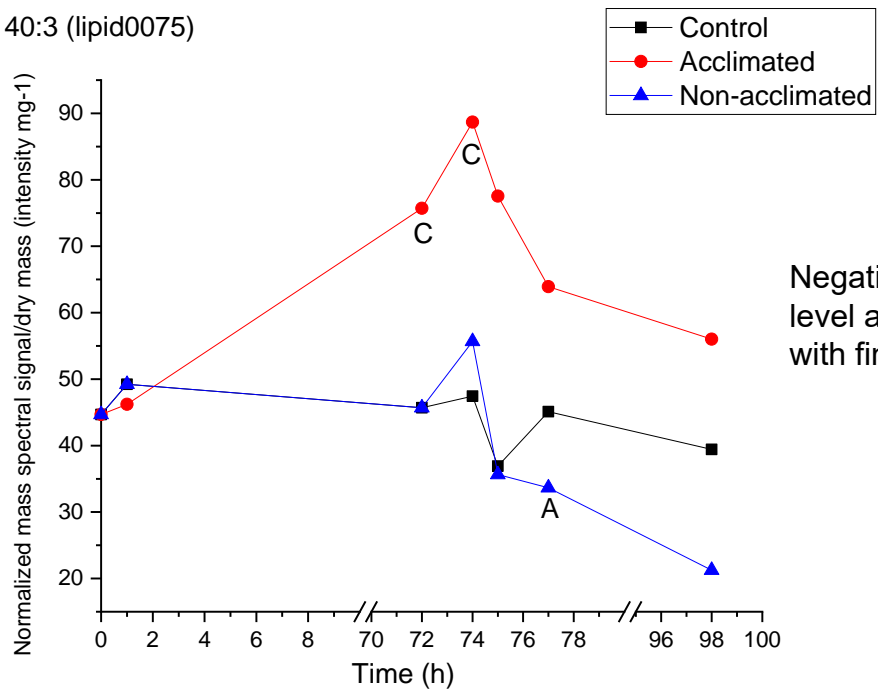

PE 42:2 (lipid0079)

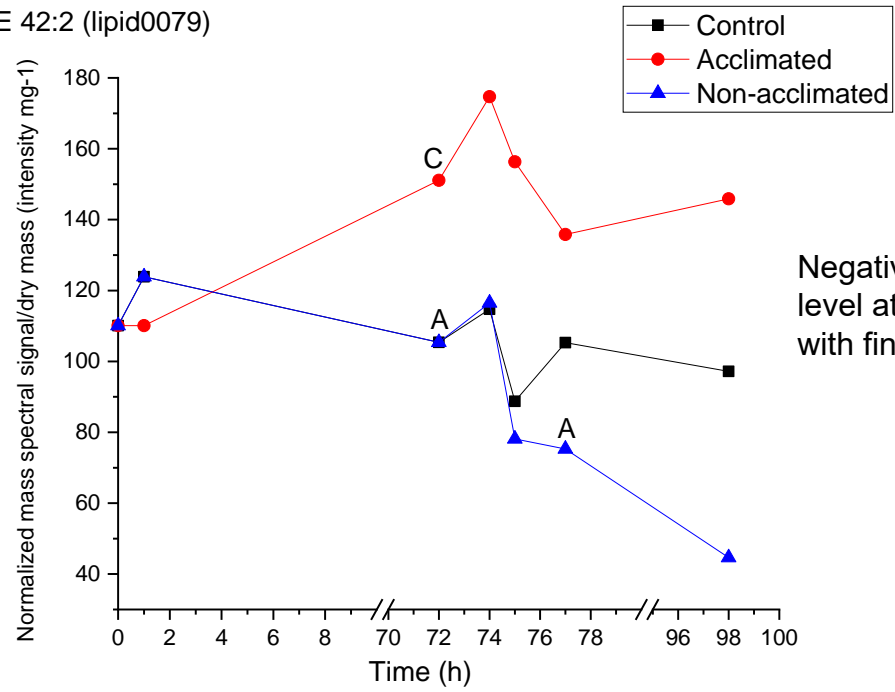

Negative correlation of lipid level at 74, 75, and 77 h with final ion leakage

PE 42:3 (measured in positive mode) (lipid0078)

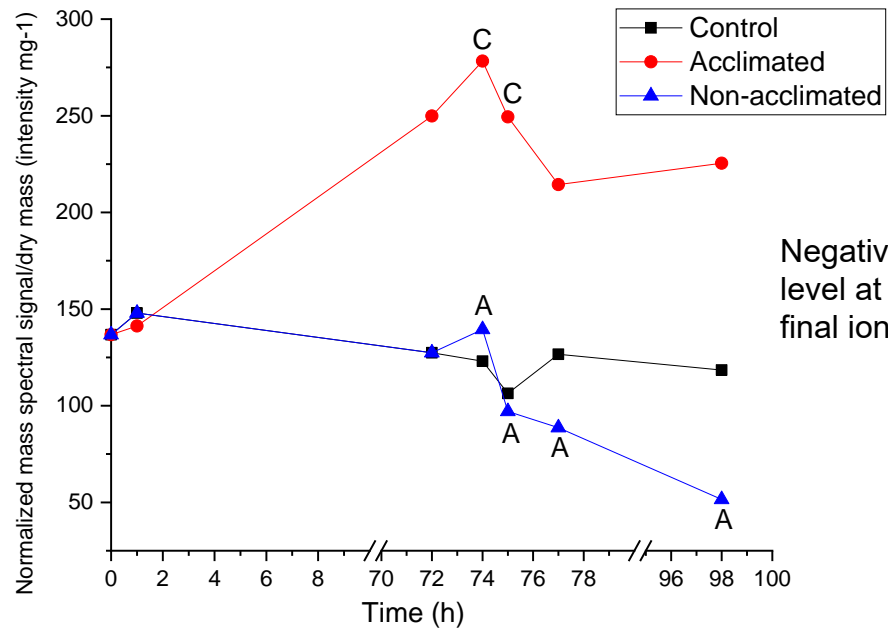

Negative correlation of lipid level at 74, 75, and 77 h with final ion leakage



PS 34:3 (lipid0095)

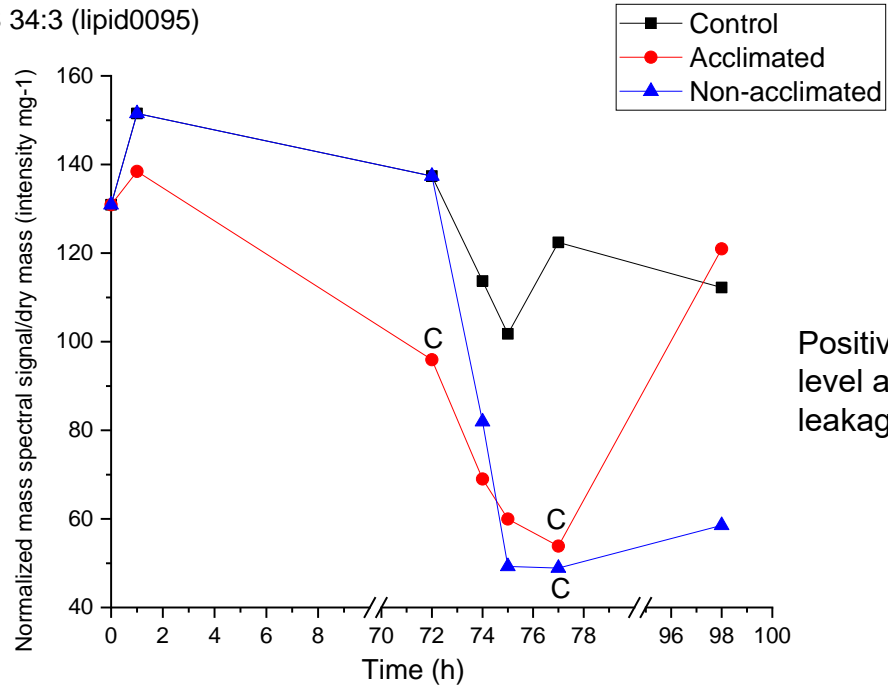

PS 42:2 (lipid0116)

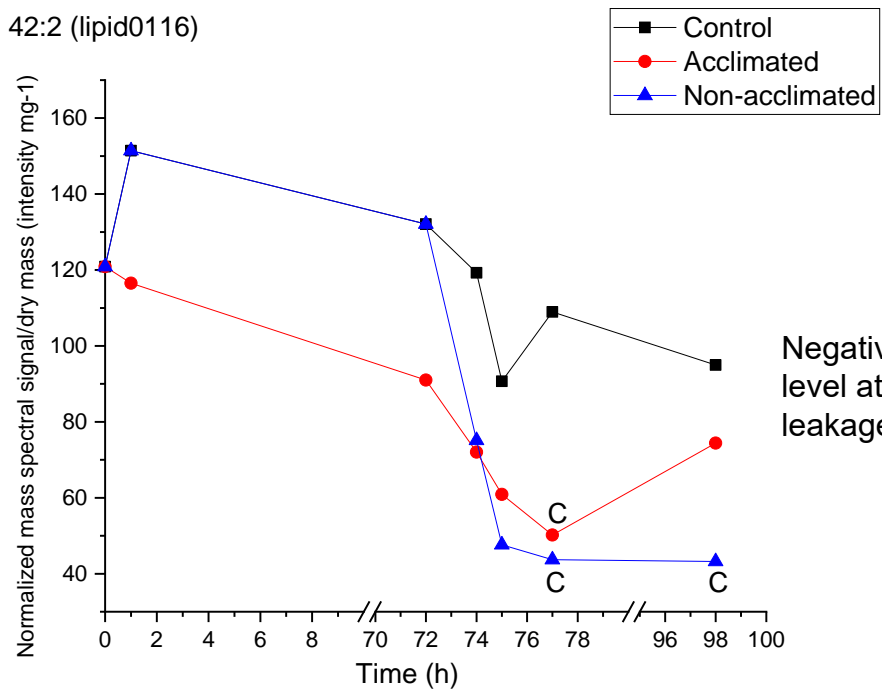

PS 42:3 (lipid0115)

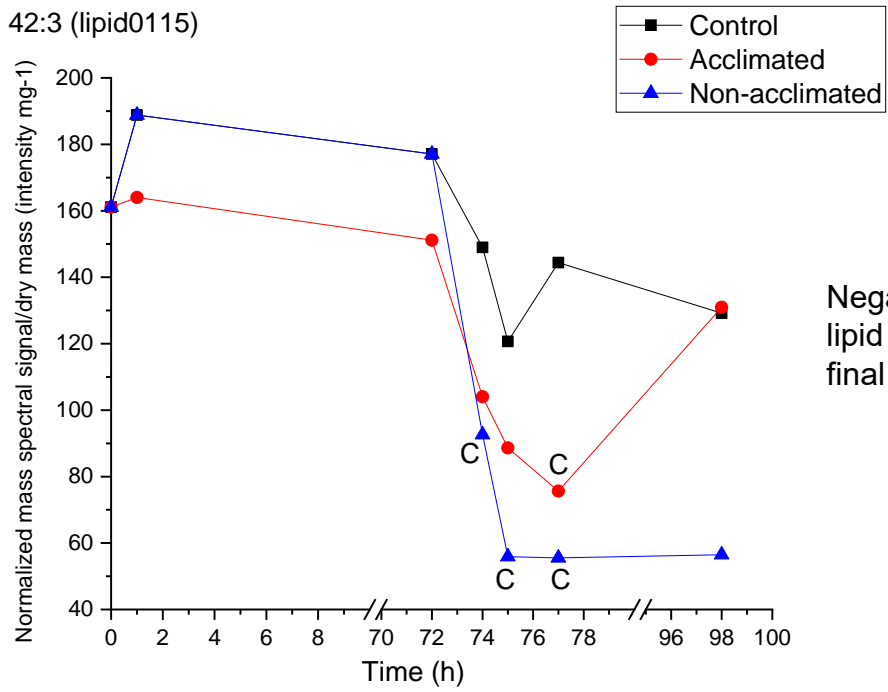

Negative correlation of lipid level at 75 h with final ion leakage

GIPC 42:1;O4 (lipid0210)

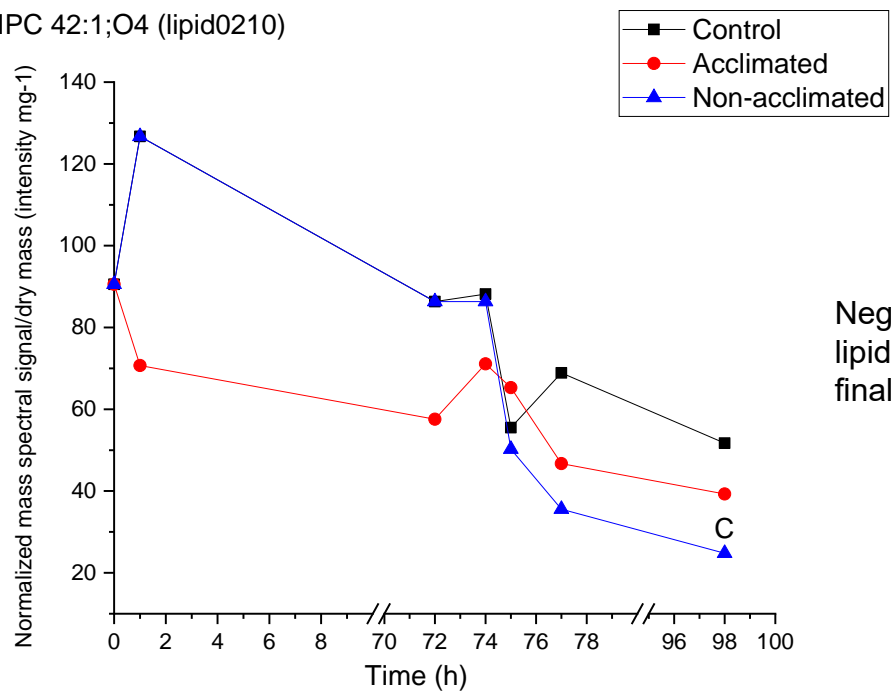

Negative correlation of lipid level at 75 h with final ion leakage

GIPC 42:2;O4 (lipid0212)

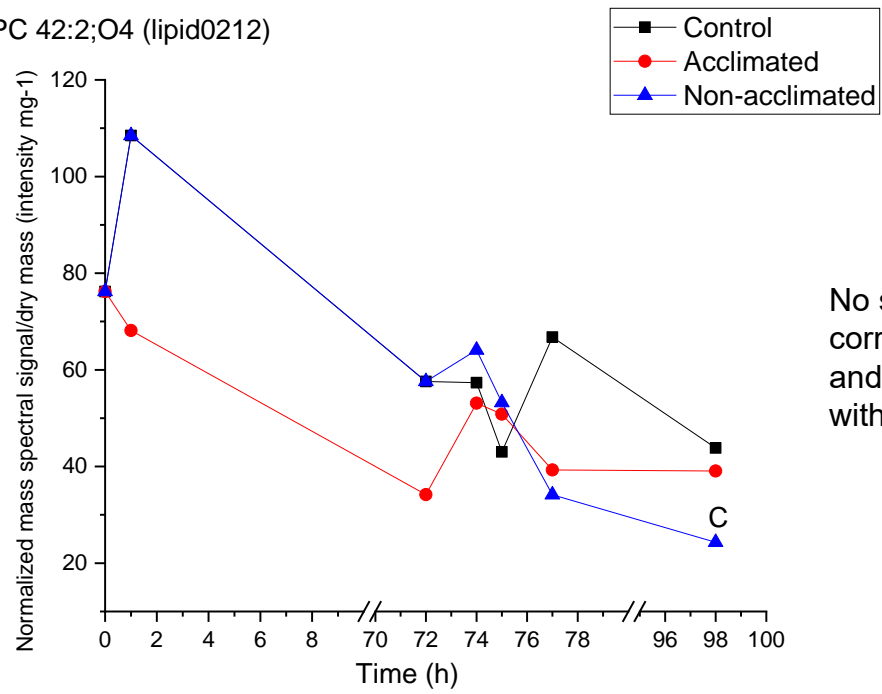

No significant correlation of 74, 75, and 77 h lipid levels with final ion leakage

Figure S3. Time courses of levels of polygalactosylated lipids in rosettes of control, non-acclimated, and acclimated plants. Treatments are shown in Figure 1. "C" indicates that the lipid level in non-acclimated or acclimated plants is significantly different than the control level, and "A" indicates that the lipid level in non-acclimated plants is significantly different than the level in acclimated plants (Table S2). Indicated on each plot is whether there is significant correlation of lipid level at the 74-, 75-, and 77-h time points with final (98 h) ion leakage.

| Lipid number | Panel | Class, oxidation    | Lipid name |
|--------------|-------|---------------------|------------|
| lipid0305    | 3A    | TeGDG, non-oxidized | TeGDG 34:6 |
| lipid0309    | 3A    | TeGDG, non-oxidized | TeGDG 36:6 |
| lipid0294    | 3B    | TrGDG, non-oxidized | TrGDG 34:6 |
| lipid0298    | 3B    | TrGDG, non-oxidized | TrGDG 36:6 |

TeGDG 34:6 (lipid0305)

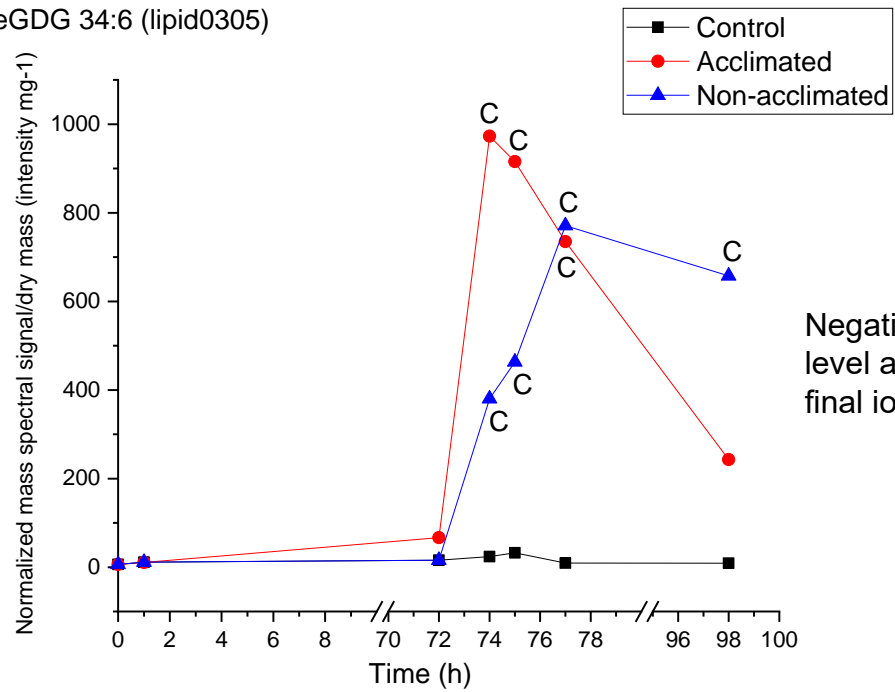

TeGDG 36:6 (lipid0309)

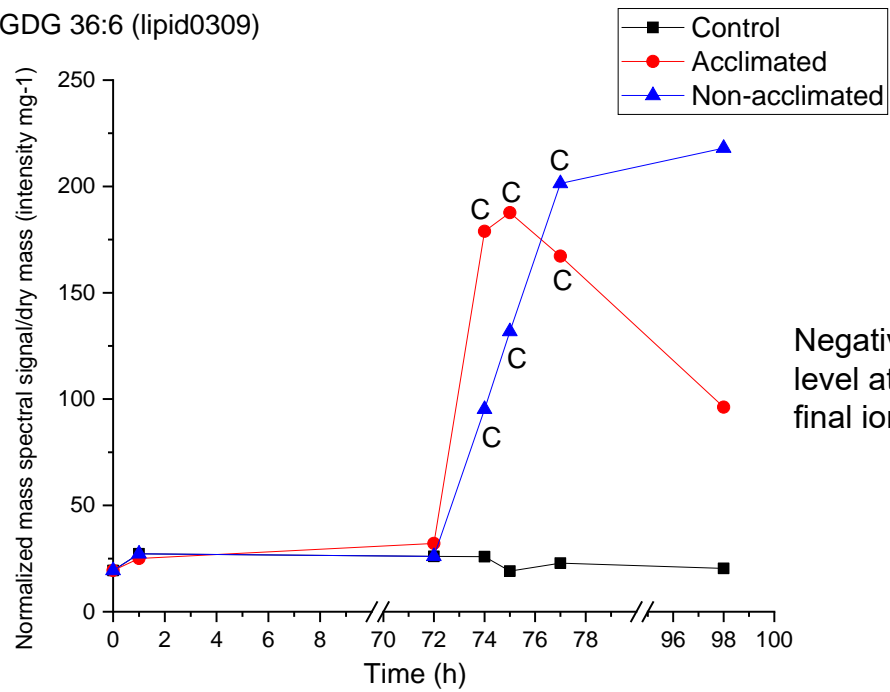

TrGDG 34:6 (lipid0294)

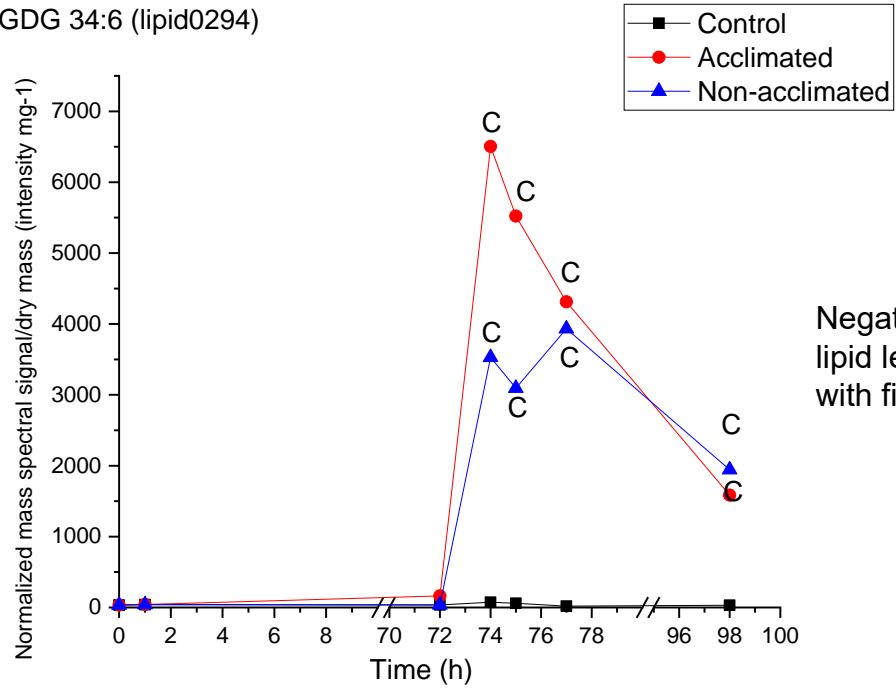

Negative correlation of lipid level at 74 and 75 h with final ion leakage

TrGDG 36:6 (lipid0298)

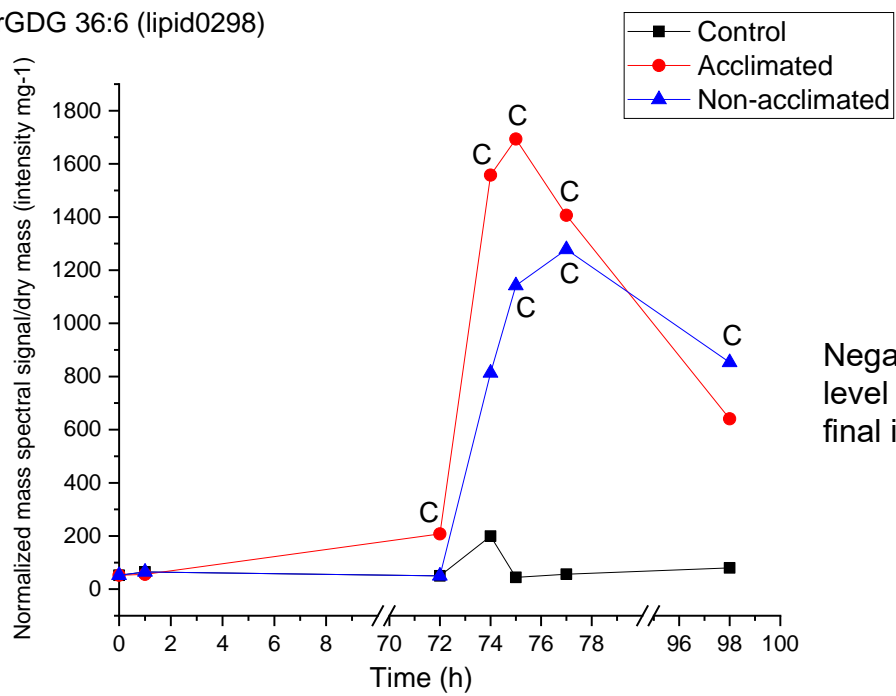

Negative correlation of lipid level at 74 and 75 h with final ion leakage

Figure S4. Time courses of levels of selected phosphatidic acids in rosettes of control, non-acclimated, and acclimated plants. Treatments are shown in Figure 1. Asterisks indicate lipids with quality control (pooled sample) levels less than 0.75 (\*) or 0.25 (\*\*) units of normalized mass spectral intensity, where 1 = intensity of 1 pmol of internal standard. "C" indicates that the lipid level in non-acclimated or acclimated plants is significantly different than the control level, and "A" indicates that the lipid level in non-acclimated plants is significantly different than the level in acclimated plants (Table S2). Indicated on each plot is whether there is significant correlation of lipid level at the 74-, 75-, and 77-h time points with final (98 h) ion leakage.

| Lipid number             | Panel | Class, oxidation | Lipid name |
|--------------------------|-------|------------------|------------|
| <b>extraplastidic PA</b> |       |                  |            |
| lipid0126                | 4A    | PA, non-oxidized | PA 34:1    |
| lipid0125                | 4A    | PA, non-oxidized | PA 34:2    |
| lipid0124                | 4B    | PA, non-oxidized | PA 34:3    |
| lipid0123                | 4B    | PA, non-oxidized | PA 34:4    |
| lipid0131                | 4C    | PA, non-oxidized | PA 36:2    |
| lipid0130                | 4C    | PA, non-oxidized | PA 36:3    |
| lipid0129                | 4D    | PA, non-oxidized | PA 36:4    |
| lipid0128                | 4D    | PA, non-oxidized | PA 36:5    |
| lipid0127                | 4E    | PA, non-oxidized | PA 36:6    |
| <b>plastidic PA</b>      |       |                  |            |
| lipid0122                | 4E    | PA, non-oxidized | PA 34:5*   |
| lipid0121                | 4F    | PA, non-oxidized | PA 34:6    |

PA 34:1 (lipid0126)

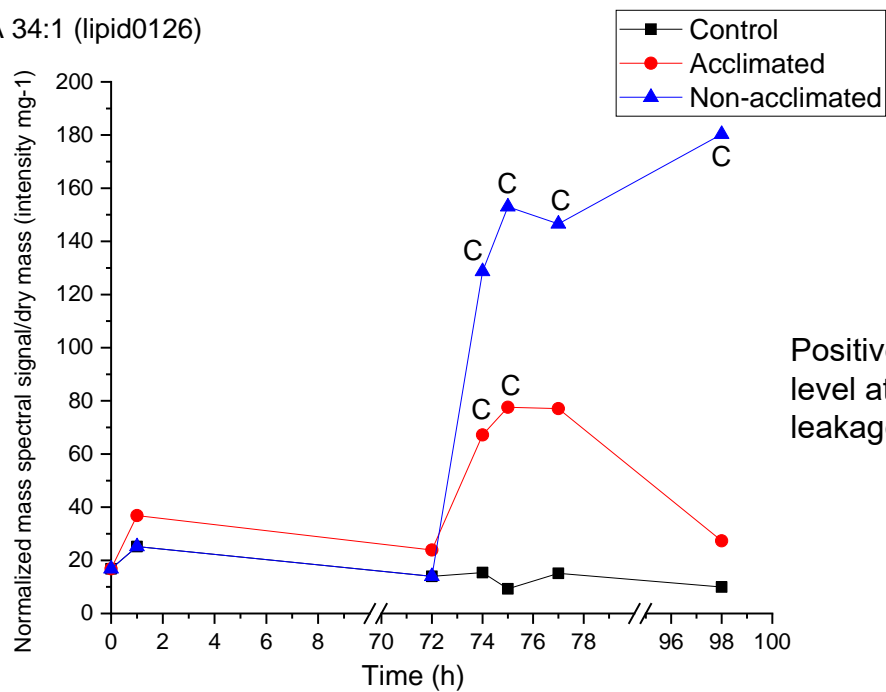

PA 34:2 (lipid0125)

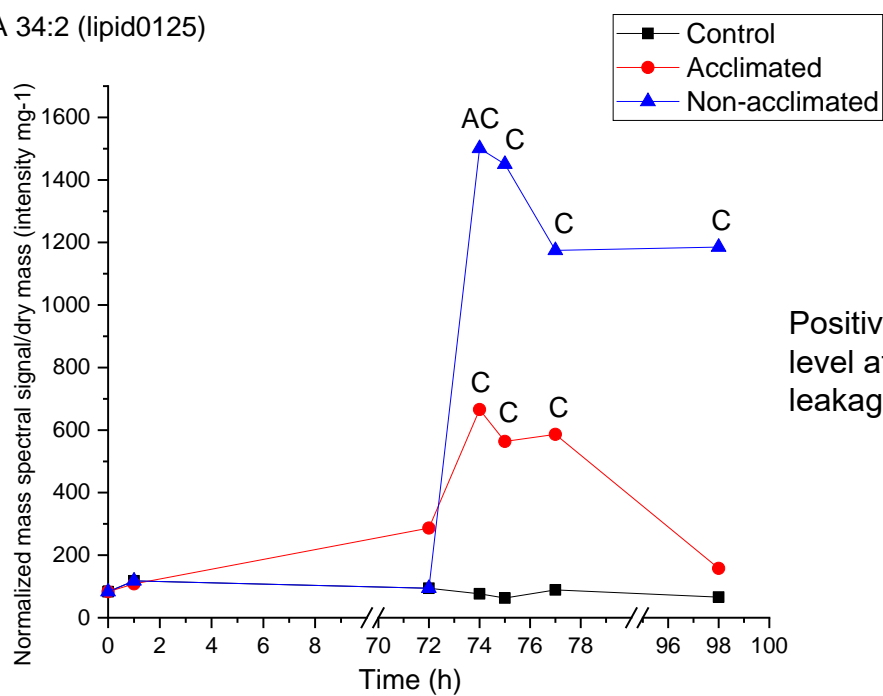



PA 34:3 (lipid0124)

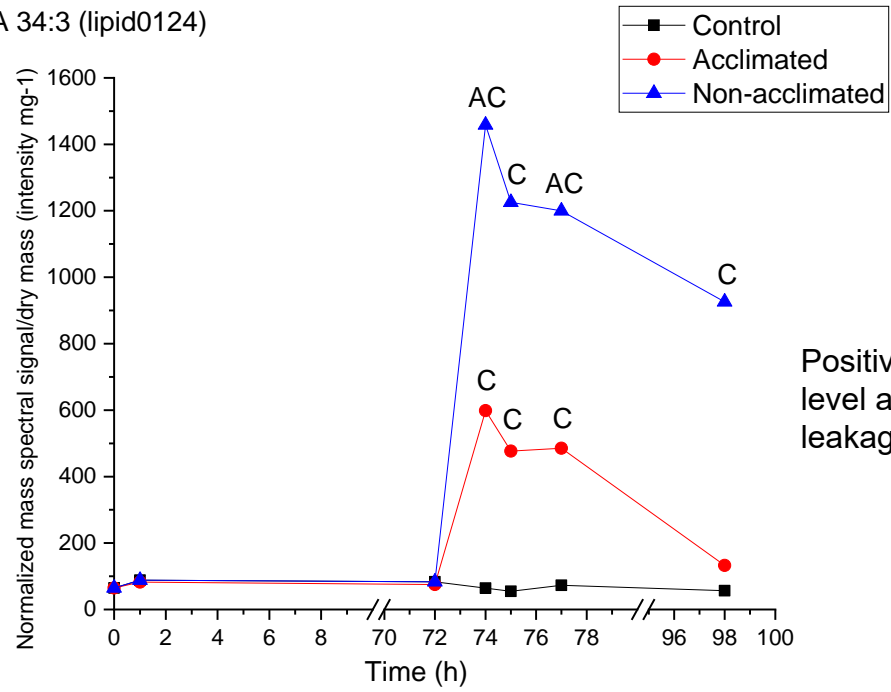

PA 34:4 (lipid0123)

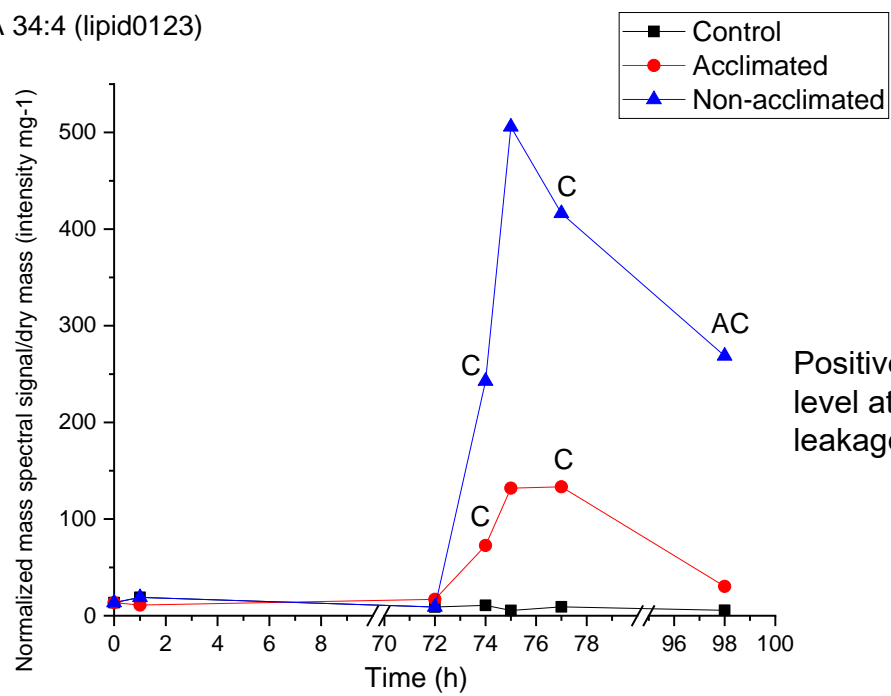

PA 36:2 (lipid0131)

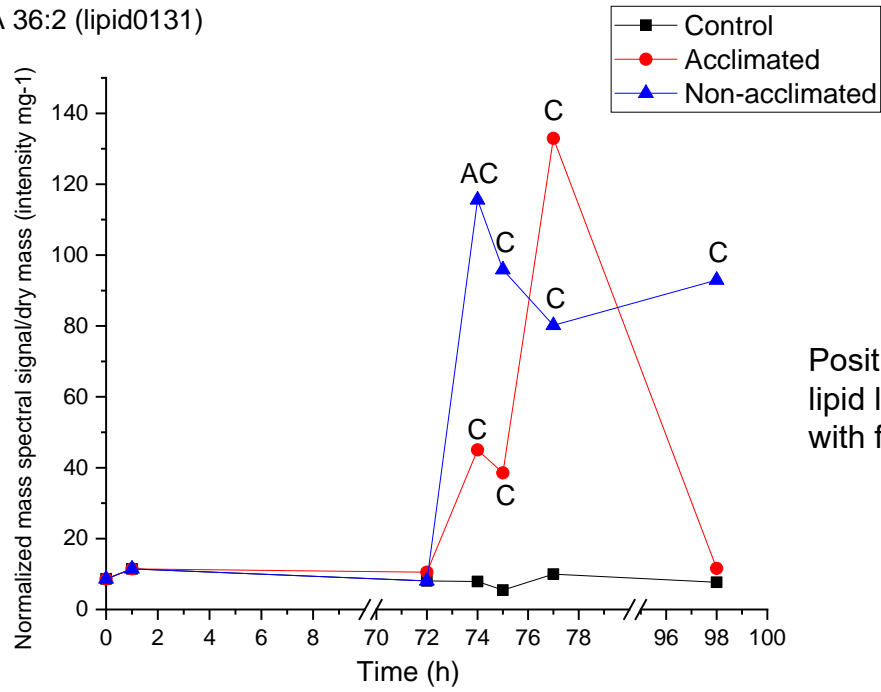

PA 36:3 (lipid0130)

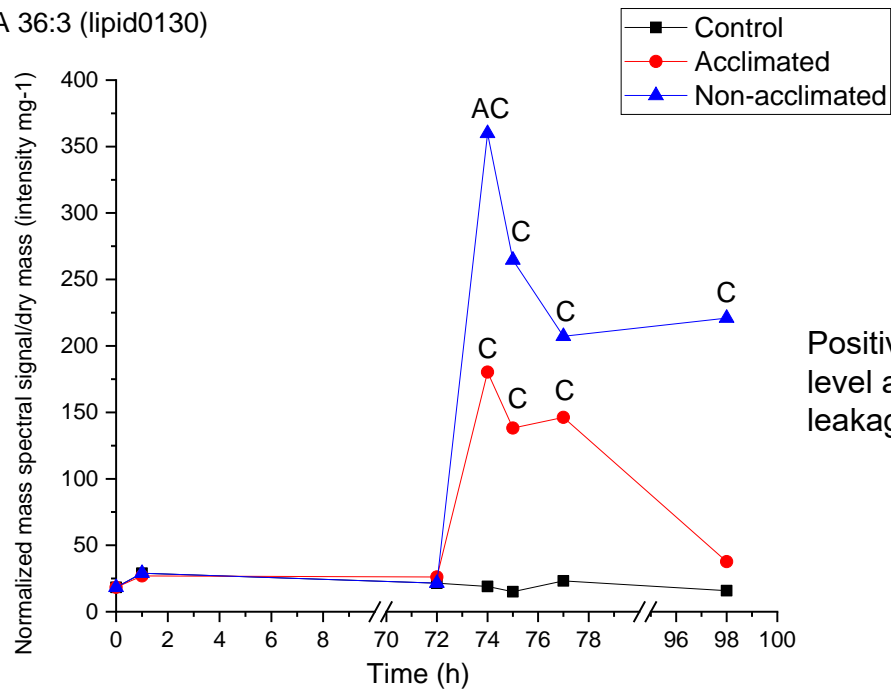

PA 36:4 (lipid0129)

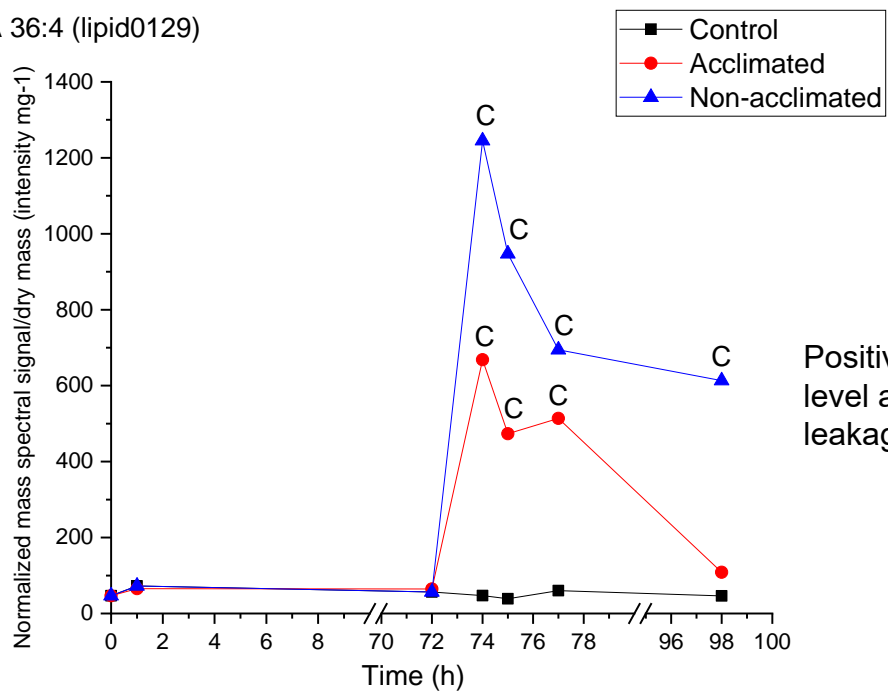

Positive correlation of lipid level at 74 h with final ion leakage

PA 36:5 (lipid0128)

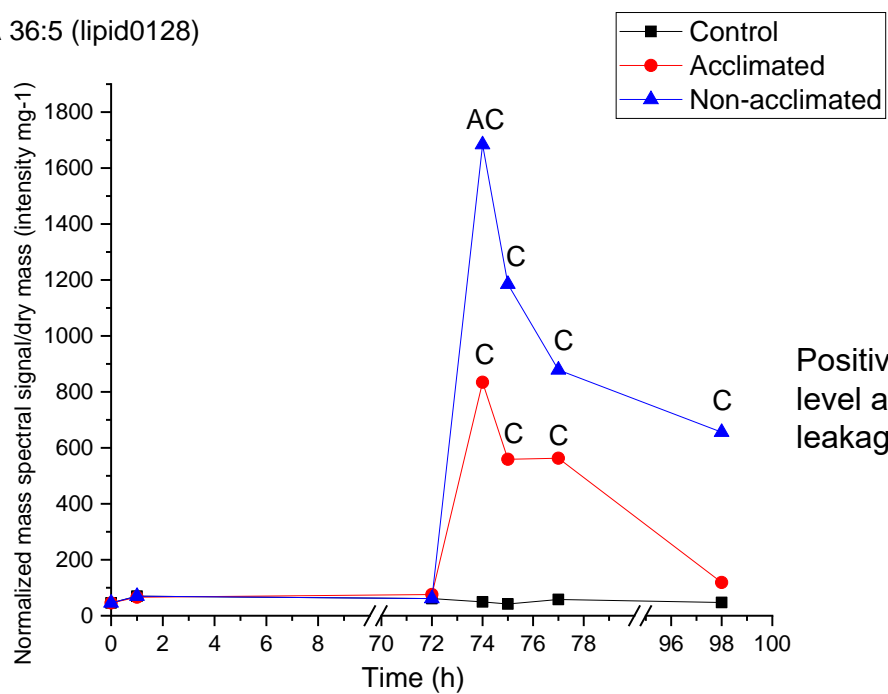

Positive correlation of lipid level at 74 h with final ion leakage

PA 36:6 (lipid0127)

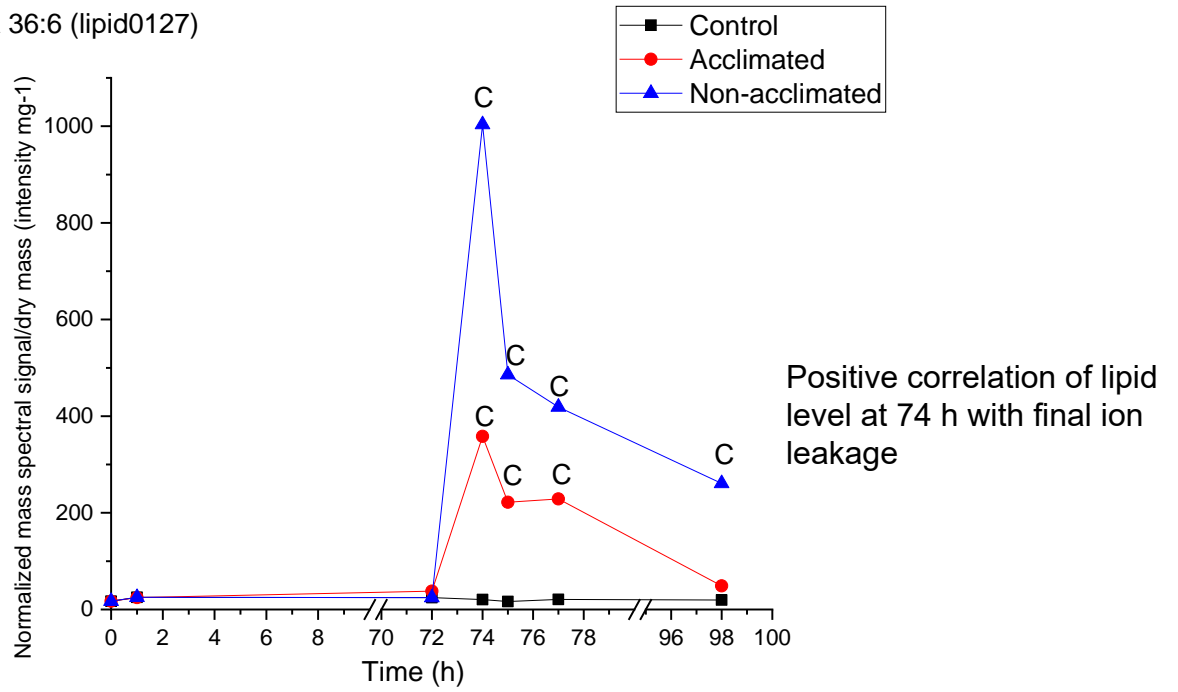

PA 34:5\* (lipid0122)

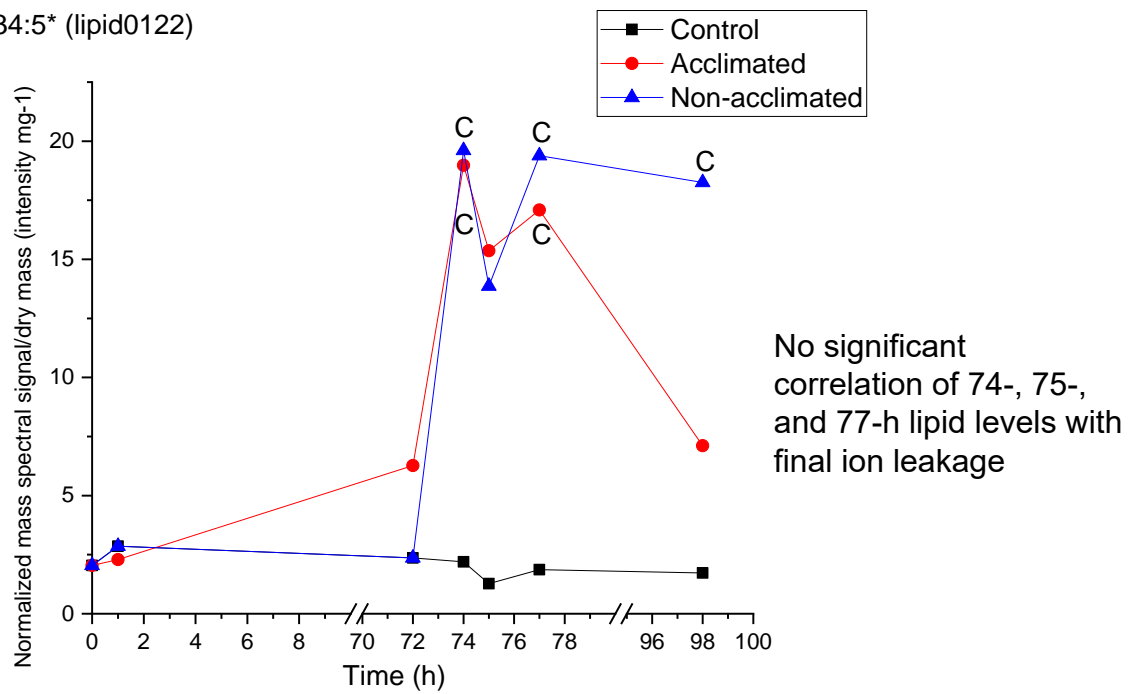

PA 34:6 (lipid0121)

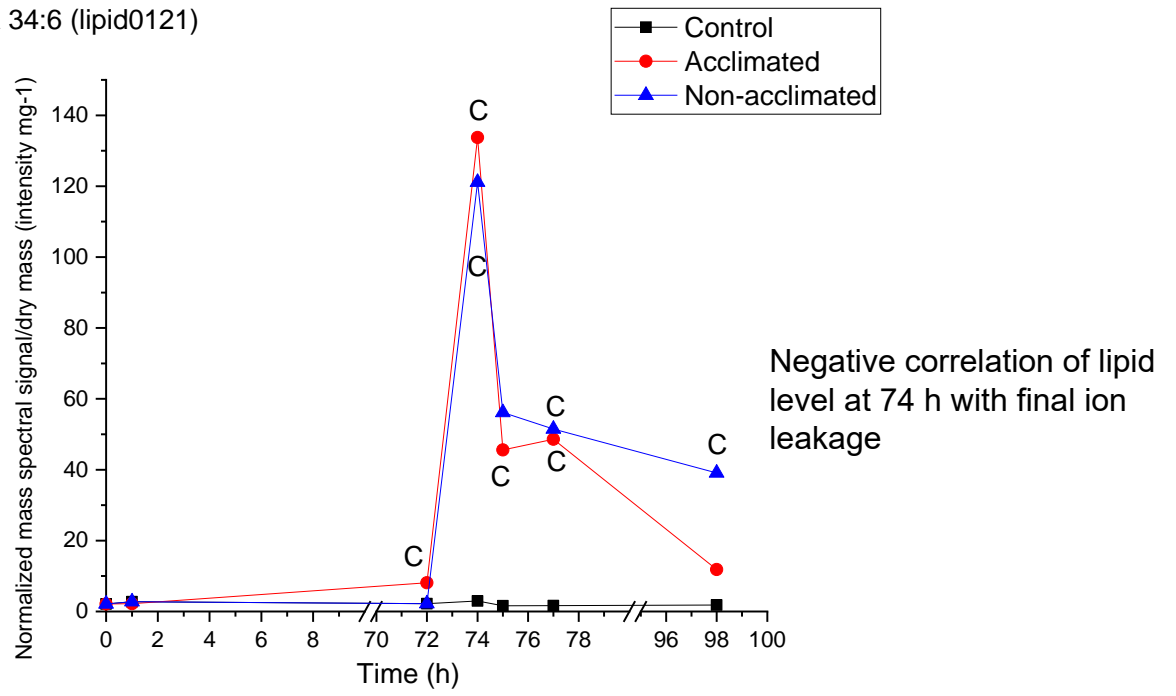

Figure S5. Time courses of levels of selected head group-acylated chloroplast lipids in rosettes of control, non-acclimated, and acclimated plants. Treatments are shown in Figure 1. Asterisks indicate lipids with quality control (pooled sample) levels less than 0.75 (\*) or 0.25 (\*\*) units of normalized mass spectral intensity, where 1 = intensity of 1 pmol of internal standard. "C" indicates that the lipid level in non-acclimated or acclimated plants is significantly different than the control level, and "A" indicates that the lipid level in non-acclimated plants is significantly different than the level in acclimated plants (Table S2). Indicated on each plot is whether there is significant correlation of lipid level at the 74-, 75-, and 77-h time points with final (98 h) ion leakage.

| Lipid number | Panel | Lipid name (new Lipid Maps nomenclature or similar) | Previous nomenclature |
|--------------|-------|-----------------------------------------------------|-----------------------|
|--------------|-------|-----------------------------------------------------|-----------------------|

**Non-oxidized, acylated chloroplast lipids**

|           |    |                      |                   |
|-----------|----|----------------------|-------------------|
| lipid0473 | 5A | MGDG-O(FA 16:0) 34:6 | acMGDG(16:0/34:6) |
| lipid0464 | 5A | MGDG-O(FA 16:1) 34:6 | acMGDG(16:1/34:6) |
| lipid0459 | 5B | MGDG-O(FA 16:2) 34:6 | acMGDG(16:2/34:6) |
| lipid0448 | 5B | MGDG-O(FA 16:3) 34:6 | acMGDG(16:3/34:6) |
| lipid0526 | 5C | MGDG-O(FA 18:0) 34:6 | acMGDG(18:0/34:6) |
| lipid0514 | 5C | MGDG-O(FA 18:2) 34:6 | acMGDG(18:2/34:6) |
| lipid0501 | 5D | MGDG-O(FA 18:3) 34:6 | acMGDG(18:3/34:6) |

**Oxidized (at least one acyl chain), acylated chloroplast lipids**

|           |    |                                                     |                                               |
|-----------|----|-----------------------------------------------------|-----------------------------------------------|
| lipid0601 | 5E | DGDG-O(FA 18:4;O) 36:6 or DGDG-O(FA 18:4;O) 34:8;O2 | acDGDG(18:4-O/36:6) or acDGDG(18:4-O/34:8-2O) |
| lipid0603 | 5E | DGDG-O(FA 18:4;O) 36:8;O2                           | acDGDG(18:4-O/36:8-2O)                        |
| lipid0474 | 5F | MGDG-O(FA 16:0) 34:7;O                              | acMGDG(16:0/34:7-O)                           |
| lipid0483 | 5F | MGDG-O(FA 16:0) 36:8;O2                             | acMGDG(16:0/36:8-2O)                          |
| lipid0496 | 5G | MGDG-O(FA 16:3;O) 34:6                              | acMGDG(16:3-O/34:6)                           |
| lipid0498 | 5G | MGDG-O(FA 16:3;O) 34:8;O2 or MGDG-O(FA 16:3;O) 36:6 | acMGDG(16:3-O/34:8-2O) or acMGDG(16:3-O/36:6) |
| lipid0500 | 5H | MGDG-O(FA 16:3;O) 36:8;O2                           | acMGDG(16:3-O/36:8-2O)                        |

|           |    |                                                       |                                                 |
|-----------|----|-------------------------------------------------------|-------------------------------------------------|
| lipid0487 | 5H | MGDG-O(FA 16:4;O) 34:7;O                              | acMGDG(16:4-O/34:7-O)                           |
| lipid0489 | 5I | MGDG-O(FA 16:4;O) 34:8;O2 or MGDG-O(FA 16:4;O) 36:6   | acMGDG(16:4-O/34:8-2O) or acMGDG(16:4-O/36:6)   |
| lipid0495 | 5I | MGDG-O(FA 16:4;O) 36:8;O2                             | acMGDG(16:4-O/36:8-2O)                          |
| lipid0527 | 5J | MGDG-O(FA 18:0) 34:7;O                                | acMGDG(18:0/34:7-O)                             |
| lipid0515 | 5J | MGDG-O(FA 18:2) 34:7;O                                | acMGDG(18:2/34:7-O)                             |
| lipid0518 | 5K | MGDG-O(FA 18:2) 36:8;O2                               | acMGDG(18:2/36:8-2O)                            |
| lipid0551 | 5K | MGDG-O(FA 18:2;O) 36:6 or MGDG-O(FA 18:2;O) 34:8;O2   | acMGDG(18:2-O/36:6) or acMGDG(18:2-O/34:8-2O)   |
| lipid0596 | 5L | MGDG-O(FA 18:2;O3) 36:6 or MGDG-O(FA 18:2;O3) 34:8;O2 | acMGDG(18:2-3O/36:6) or acMGDG(18:2-3O/34:8-2O) |
| lipid0553 | 5L | MGDG-O(FA 18:2;O) 36:8;O2                             | acMGDG(18:2-O/36:8-2O)                          |
| lipid0503 | 5M | MGDG-O(FA 18:3) 34:7;O                                | acMGDG(18:3/34:7-O)                             |
| lipid0508 | 5M | MGDG-O(FA 18:3) 36:7;O                                | acMGDG(18:3/36:7-O)                             |
| lipid0512 | 5N | MGDG-O(FA 18:3) 36:8;O2                               | acMGDG(18:3/36:8-2O)                            |
| lipid0542 | 5N | MGDG-O(FA 18:3;O) 34:6                                | acMGDG(18:3-O/34:6)                             |
| lipid0543 | 5O | MGDG-O(FA 18:3;O) 34:7;O                              | acMGDG(18:3-O/34:7-O)                           |
| lipid0544 | 5O | MGDG-O(FA 18:3;O) 36:6 or MGDG-O(FA 18:3;O) 34:8;O2   | acMGDG(18:3-O/36:6) or acMGDG(18:3-O/34:8-2O)   |
| lipid0546 | 5P | MGDG-O(FA 18:3;O) 36:6;O                              | acMGDG(18:3-O/36:6-O)                           |
| lipid0548 | 5P | MGDG-O(FA 18:3;O) 36:8;O2                             | acMGDG(18:3-O/36:8-2O)                          |
| lipid0566 | 5Q | MGDG-O(FA 18:3;O2) 34:6                               | acMGDG(18:3-2O/34:6)                            |
| lipid0570 | 5Q | MGDG-O(FA 18:3;O2) 36:6 or MGDG-O(FA 18:3;O2) 34:8;O2 | acMGDG(18:3-2O/36:6) or acMGDG(18:3-2O/34:8-2O) |
| lipid0580 | 5R | MGDG-O(FA 18:3;O2) 36:8;O2                            | acMGDG(18:3-2O/36:8-2O)                         |
| lipid0591 | 5R | MGDG-O(FA 18:3;O3) 34:6                               | acMGDG(18:3-3O/34:6)                            |
| lipid0592 | 5S | MGDG-O(FA 18:3;O3) 34:7;O                             | acMGDG(18:3-3O/34:7-O)                          |

|           |     |                                                                       |                                                            |
|-----------|-----|-----------------------------------------------------------------------|------------------------------------------------------------|
| lipid0595 | 5S  | MGDG-O(FA 18:3;O3) 36:8;O2                                            | acMGDG(18:3-3O/36:8-2O)                                    |
| lipid0532 | 5T  | MGDG-O(FA 18:4;O) 34:6                                                | acMGDG(18:4-O/34:6)                                        |
| lipid0533 | 5T  | MGDG-O(FA 18:4;O) 34:7;O                                              | acMGDG(18:4-O/34:7-O)                                      |
| lipid0535 | 5U  | MGDG-O(FA 18:4;O) 34:8;O2<br>(Arabidopside E or MGDG-O(FA 18:4;O)     | acMGDG(18:4-O/34:8-2O)<br>(Arabidopside E) or acMGDG(18:4- |
| lipid0538 | 5U  | MGDG-O(FA 18:4;O) 36:6;O or MGDG-O(FA 18:4;O) 34:8;O3                 | acMGDG(18:4-O/36:6-O) or<br>acMGDG(18:4-O/34:8-3O)         |
| lipid0575 | 5V  | MGDG-O(FA 18:4;O) 36:7;O2<br>(alternative fragmentation)              | acMGDG(18:4-O/36:7-2O)<br>(alternative fragmentation)      |
| lipid0537 | 5V  | MGDG-O(FA 18:4;O) 36:7;O                                              | acMGDG(18:4-O/36:7-O)                                      |
| lipid0574 | 5W  | MGDG-O(FA 18:4;O) 36:8;O2<br>(alternative fragmentation; Arabidopside | acMGDG(18:4-O/36:8-2O)<br>(alternative fragmentation;      |
| lipid0540 | 5W  | MGDG-O(FA 18:4;O) 36:8;O2<br>(Arabidopside G)                         | acMGDG(18:4-O/36:8-2O)<br>(Arabidopside G)                 |
| lipid0559 | 5X  | MGDG-O(FA 18:4;O2) 34:6                                               | acMGDG(18:4-2O/34:6)                                       |
| lipid0541 | 5X  | MGDG-O(FA 18:4;O) 38:4 or MGDG-O(FA 18:4;O) 36:6;O2                   | acMGDG(18:4-O/38:4) or<br>acMGDG(18:4-O/36:6-2O)           |
| lipid0560 | 5Y  | MGDG-O(FA 18:4;O2) 34:7;O                                             | acMGDG(18:4-2O/34:7-O)                                     |
| lipid0561 | 5Y  | MGDG-O(FA 18:4;O2) 36:6 or MGDG-O(FA 18:4;O2) 34:8;O2                 | acMGDG(18:4-2O/36:6) or<br>acMGDG(18:4-2O/34:8-2O)         |
| lipid0565 | 5Z  | MGDG-O(FA 18:4;O2) 36:8;O2                                            | acMGDG(18:4-2O/36:8-2O)                                    |
| lipid0586 | 5Z  | MGDG-O(FA 18:4;O3) 34:6                                               | acMGDG(18:4-3O/34:6)                                       |
| lipid0587 | 5AA | MGDG-O(FA 18:4;O3) 34:7;O                                             | acMGDG(18:4-3O/34:7-O)                                     |
| lipid0588 | 5AA | MGDG-O(FA 18:4;O3) 36:6 or MGDG-O(FA 18:4;O3) 34:8;O2                 | acMGDG(18:4-3O/36:6) or<br>acMGDG(18:4-3O/34:8-2O)         |
| lipid0556 | 5BB | MGDG-O(FA 18:5;O2) 36:6 or MGDG-O(FA 18:5;O2) 34:8;O2                 | acMGDG(18:5-2O/36:6) or<br>acMGDG(18:5-2O/34:8-2O)         |
| lipid0558 | 5BB | MGDG-O(FA 18:5;O2) 36:8;O2                                            | acMGDG(18:5-2O/36:8-2O)                                    |
| lipid0293 | 5CC | PG-O(FA 16:1) 36:8;O2**                                               | acPG(16:1/36:8-2O)**                                       |

**Ambiguous (with regard to oxidation), acylated chloroplast lipids**

|           |     |                                                 |                                              |
|-----------|-----|-------------------------------------------------|----------------------------------------------|
| lipid0476 | 5DD | MGDG-O(FA 16:0) 36:6 or MGDG-O(FA 16:0) 34:8;O2 | acMGDG(16:0/36:6) or<br>acMGDG(16:0/34:8-2O) |
|-----------|-----|-------------------------------------------------|----------------------------------------------|



|           |     |                                                                                     |                                                                                                             |
|-----------|-----|-------------------------------------------------------------------------------------|-------------------------------------------------------------------------------------------------------------|
| lipid0468 | 5DD | MGDG-O(FA 16:1) 36:6 or MGDG-O(FA 16:1) 34:8;O2                                     | acMGDG(16:1/36:6) or<br>acMGDG(16:1/34:8-2O)                                                                |
| lipid0461 | 5EE | MGDG-O(FA 16:2) 36:6 or MGDG-O(FA 16:2) 34:8;O2                                     | acMGDG(16:2/36:6) or<br>acMGDG(16:2/34:8-2O)                                                                |
| lipid0454 | 5EE | MGDG-O(FA 16:3) 36:6 or MGDG-O(FA 16:3) 34:8;O2                                     | acMGDG(16:3/36:6) or<br>acMGDG(16:3/34:8-2O)                                                                |
| lipid0519 | 5FF | MGDG-O(FA 16:3;O2) 34:6 or MGDG-O(FA 18:1) 34:6                                     | acMGDG(16:3-2O/34:6) or<br>acMGDG(18:1/34:6)                                                                |
| lipid0522 | 5FF | MGDG-O(FA 16:3;O2) 36:6 or MGDG-O(FA 16:3;O2) 34:8;O2 or MGDG-O(FA 16:3;O2) 36:8;O2 | acMGDG(16:3-2O/36:6) or<br>acMGDG(16:3-2O/34:8-2O) or<br>acMGDG(16:3-2O/36:8-2O) or<br>acMGDG(18:1/36:8-2O) |
| lipid0525 | 5GG | MGDG-O(FA 16:3;O2) 36:8;O2 or MGDG-O(FA 18:1) 36:8;O2                               | acMGDG(16:3-2O/36:8-2O) or<br>acMGDG(18:1/36:8-2O)                                                          |
| lipid0528 | 5GG | MGDG-O(FA 18:0) 34:8;O2 or MGDG-O(FA 18:0) 36:6                                     | acMGDG(18:0/34:8-2O) or<br>acMGDG(18:0/36:6)                                                                |
| lipid0516 | 5HH | MGDG-O(FA 18:2) 36:6 or MGDG-O(FA 18:2) 34:8;O2                                     | acMGDG(18:2/36:6) or<br>acMGDG(18:2/34:8-2O)                                                                |
| lipid0506 | 5HH | MGDG-O(FA 18:3) 34:7;O2 or MGDG-O(FA 18:3) 36:5                                     | acMGDG(18:3/34:7-2O) or<br>acMGDG(18:3/36:5)                                                                |
| lipid0505 | 5II | MGDG-O(FA 18:3) 36:6 or MGDG-O(FA 18:3) 34:8;O2                                     | acMGDG(18:3/36:6) or<br>acMGDG(18:3/34:8-2O)                                                                |

## Non-oxidized, acylated chloroplast lipids

MGDG-O(FA 16:0) 34:6 (lipid0473)

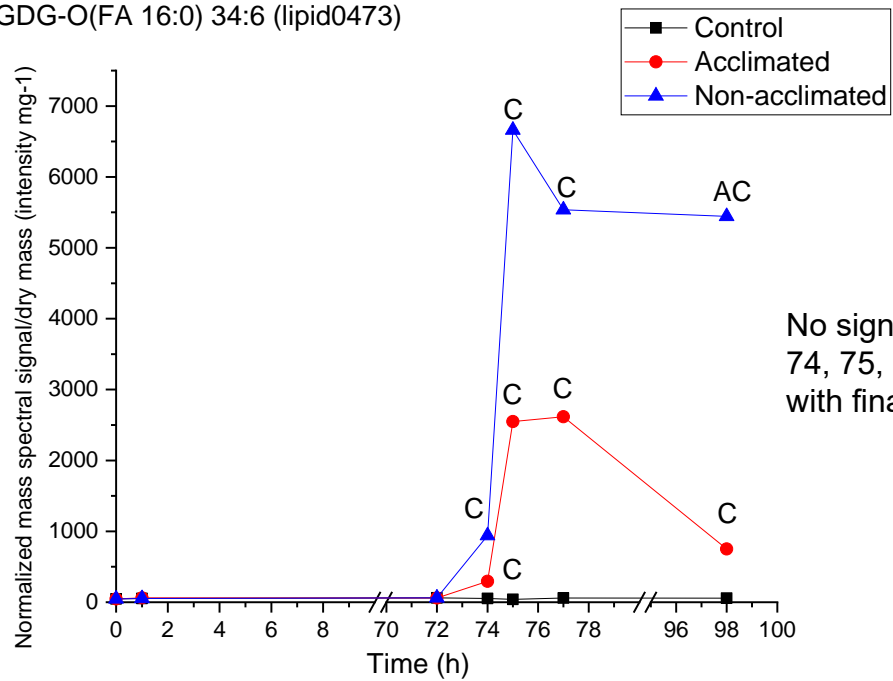

MGDG-O(FA 16:1) 34:6 (lipid0464)

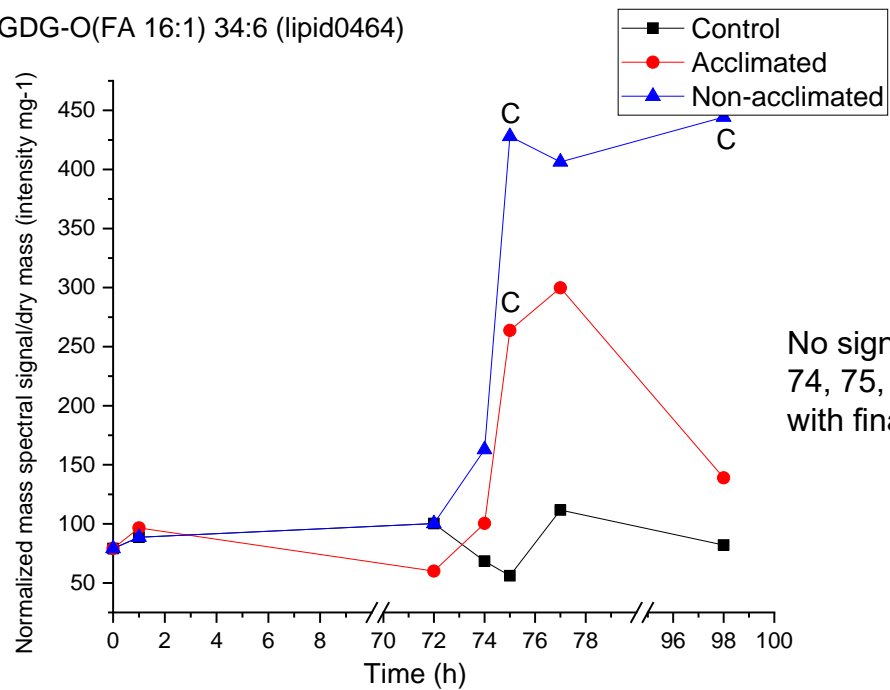

MGDG-O(FA 16:2) 34:6 (lipid0459)

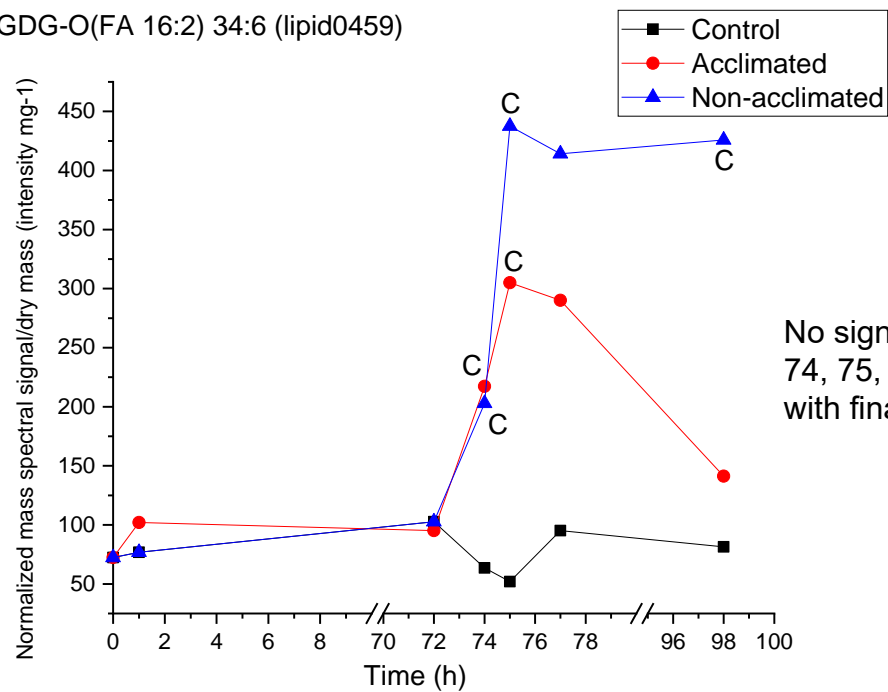

MGDG-O(FA 16:3) 34:6 (lipid0448)

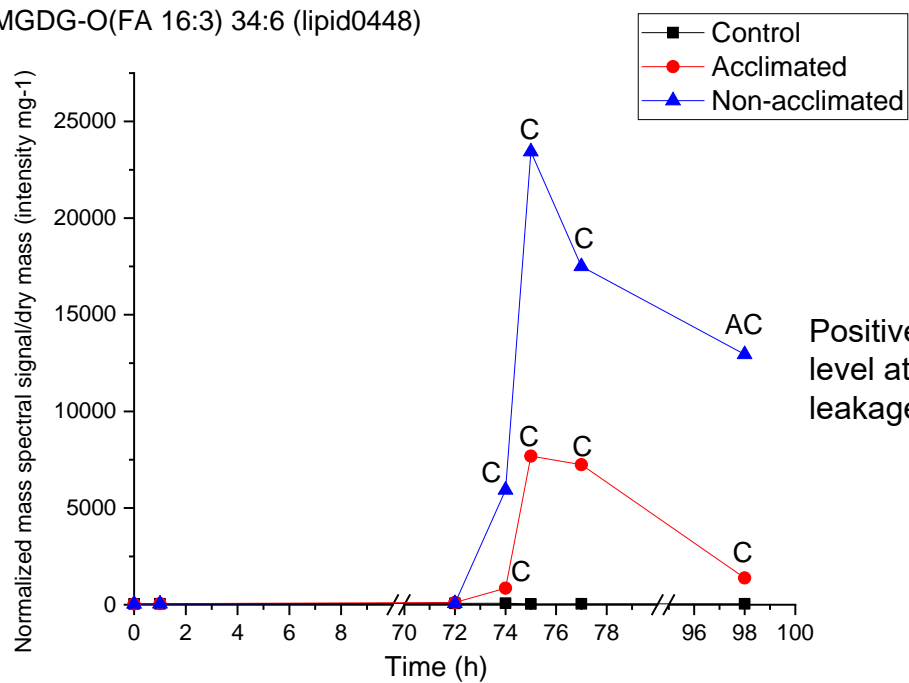

MGDG-O(FA 18:0) 34:6 (lipid0526)

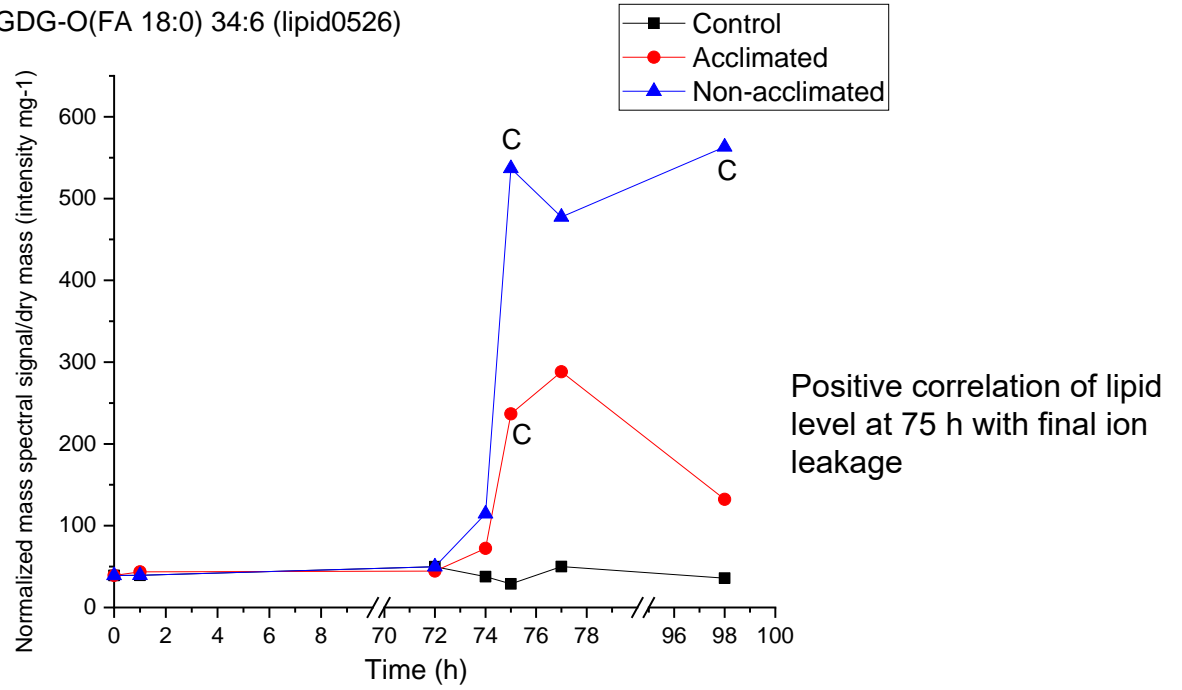

MGDG-O(FA 18:2) 34:6 (lipid0514)

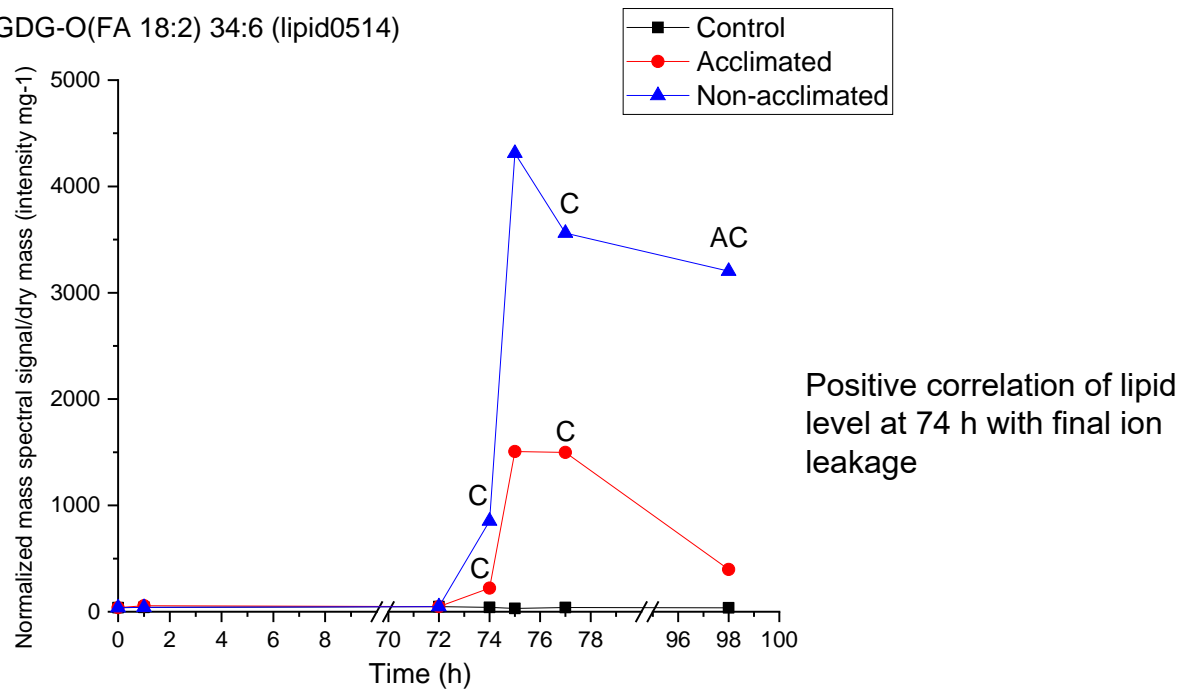

MGDG-O(FA 18:3) 34:6 (lipid0501)

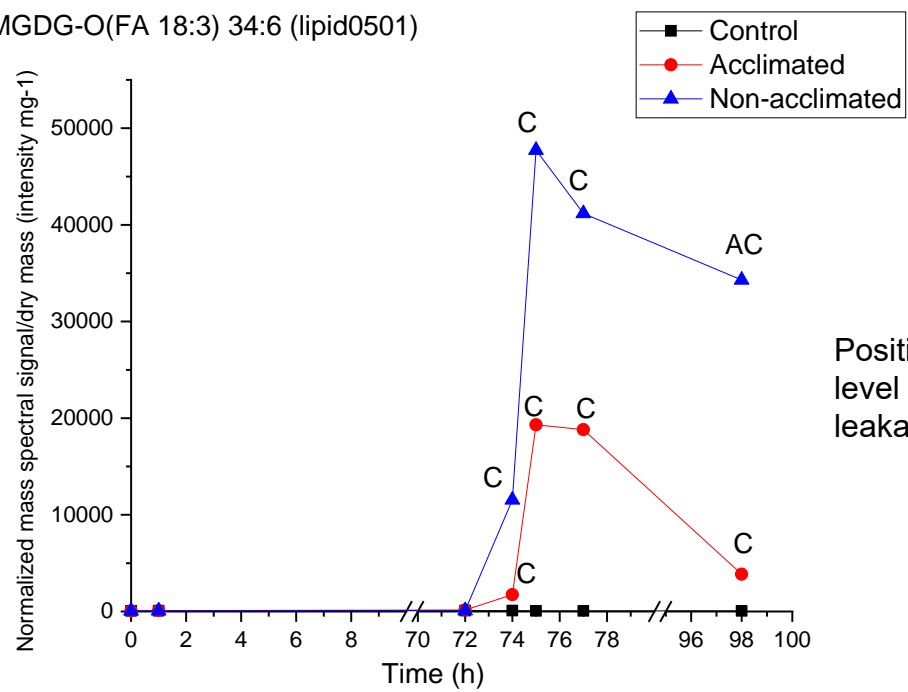

Positive correlation of lipid level at 74 h with final ion leakage

Oxidized (at least one oxidized acyl chain), acylated chloroplast lipids

DGDG-O(FA 18:4;O) 36:6 or DGDG-O(FA 18:4;O) 34:8;O<sub>2</sub> (lipid0601)

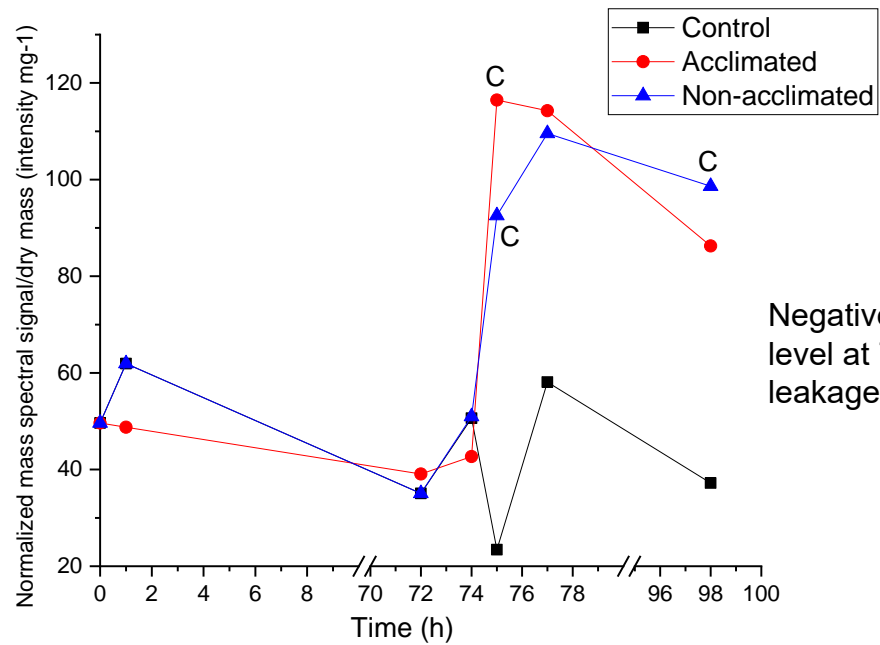

Negative correlation of lipid level at 75 h with final ion leakage

DGDG-O(FA 18:4;O) 36:8;O<sub>2</sub> (lipid0603)

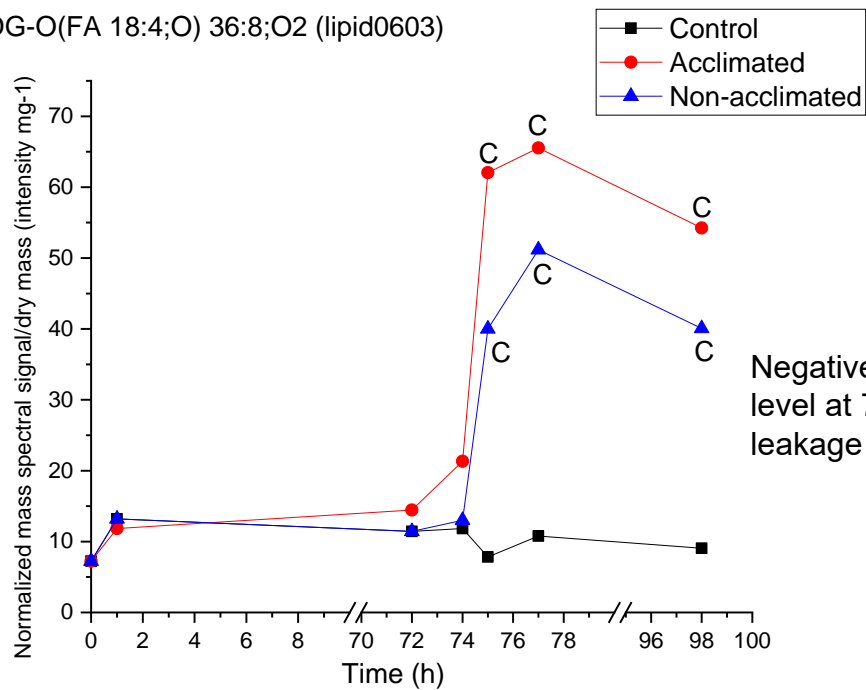

Negative correlation of lipid level at 75 h with final ion leakage

MGDG-O(FA 16:0) 34:7;O (lipid0474)

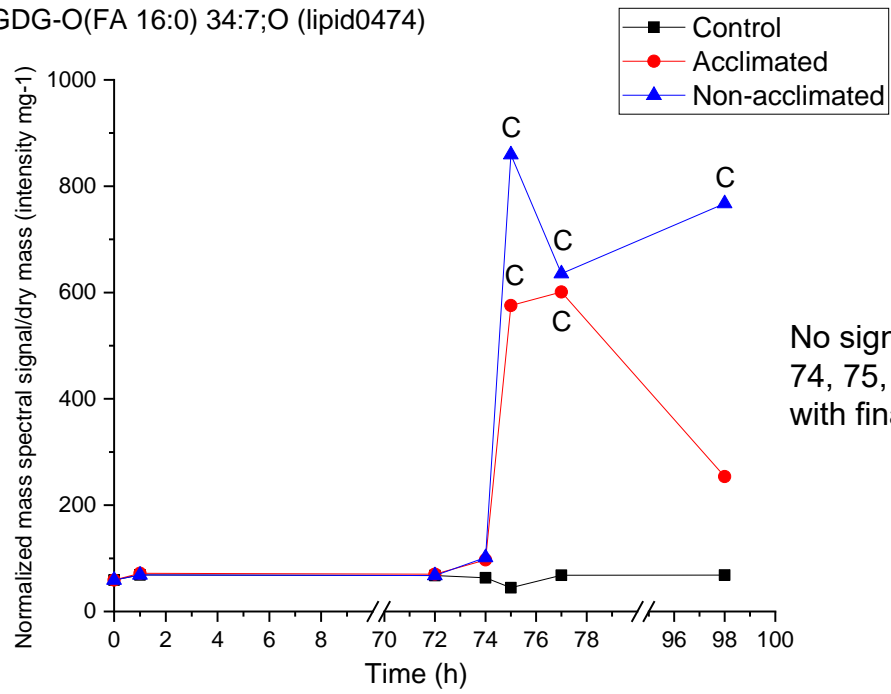

MGDG-O(FA 16:0) 36:8;O2 (lipid0483)

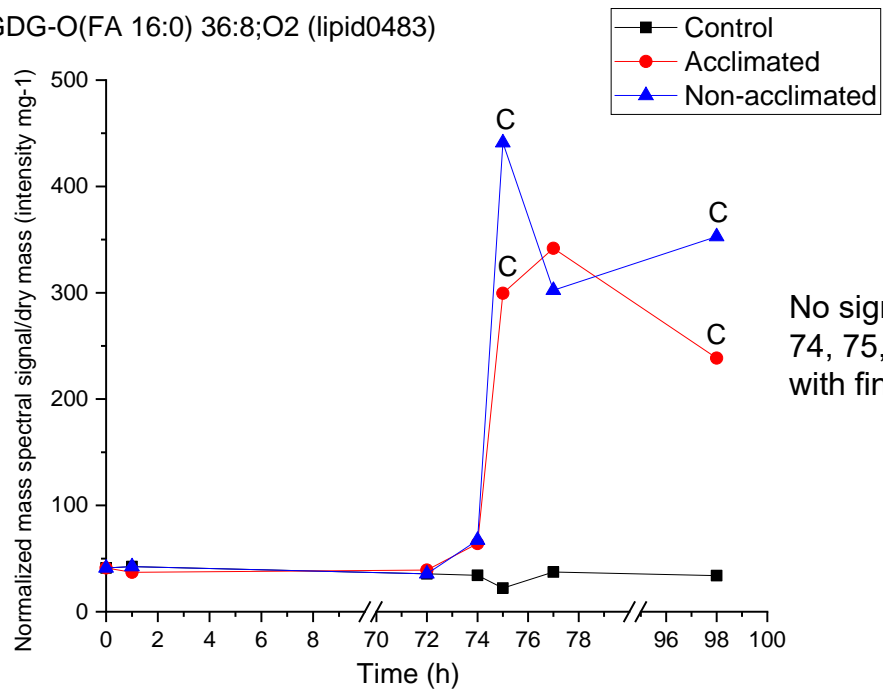

MGDG-O(FA 16:3;O) 34:6 (lipid0496)

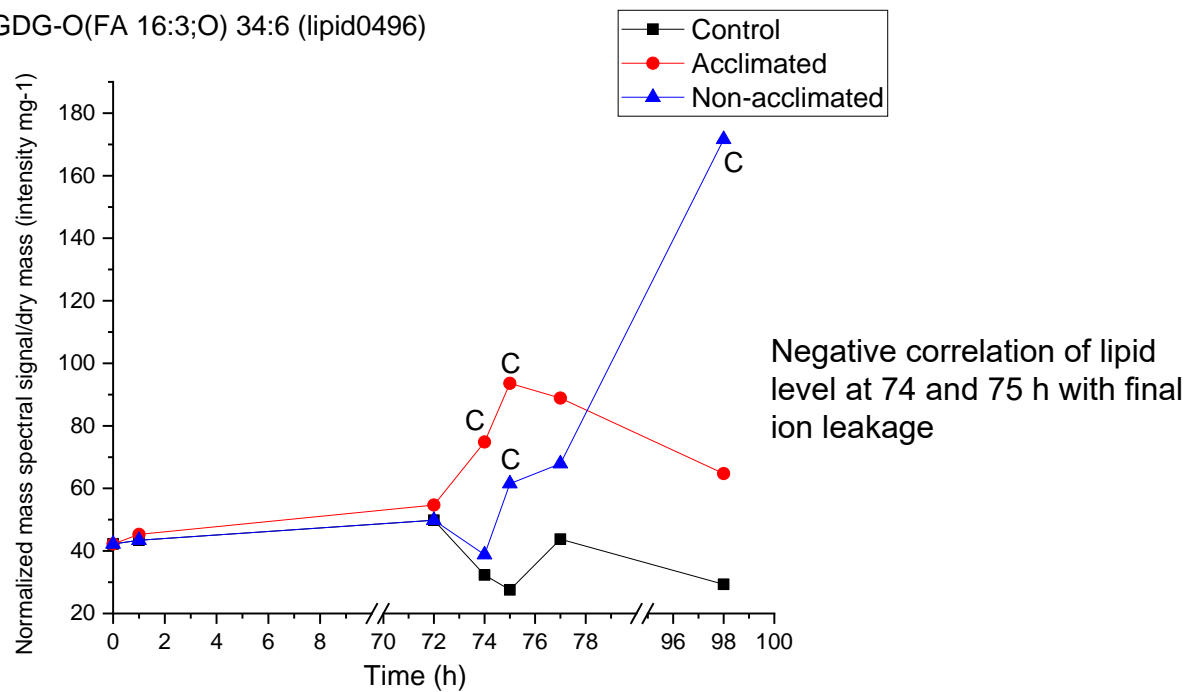

MGDG-O(FA 16:3;O) 34:8;O2 or MGDG-O(FA 16:3;O) 36:6 (lipid0498)

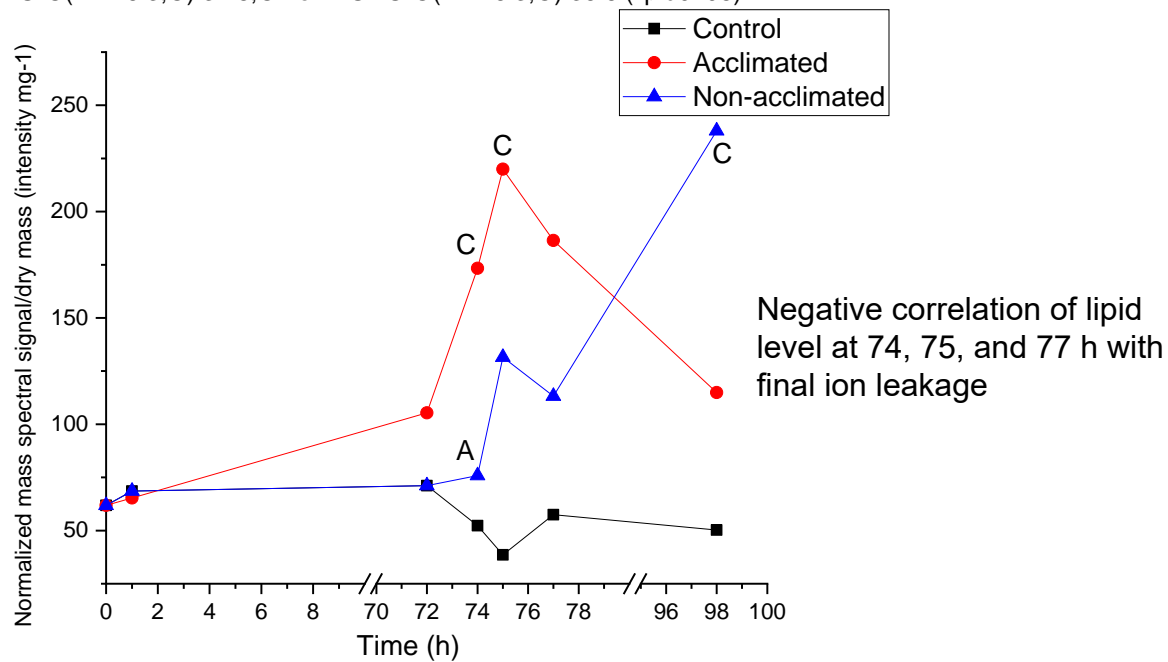



MGDG-O(FA 16:3;O) 36:8;O2 (lipid0500)

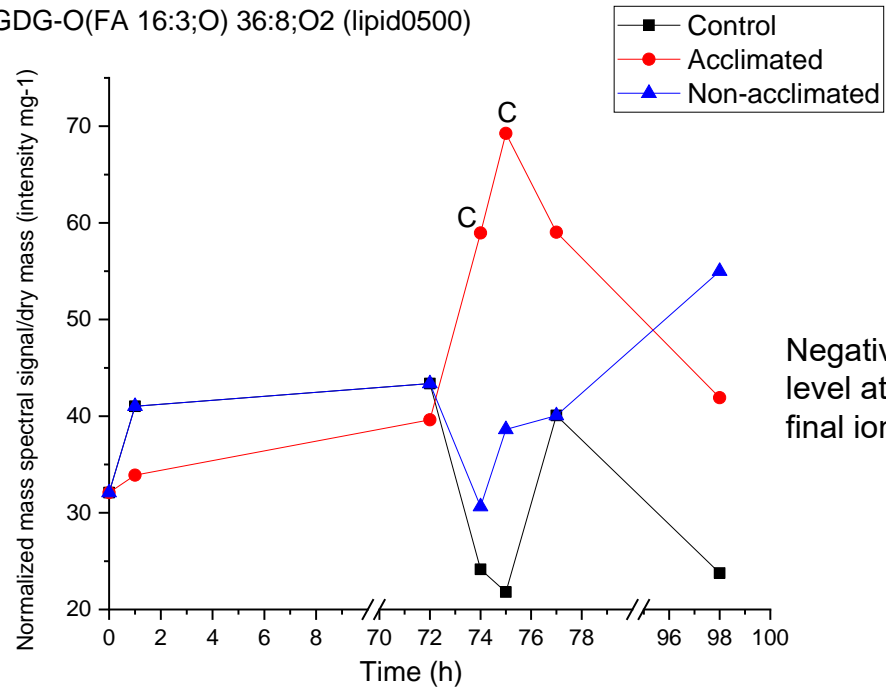

MGDG-O(FA 16:4;O) 34:7;O (lipid0487)

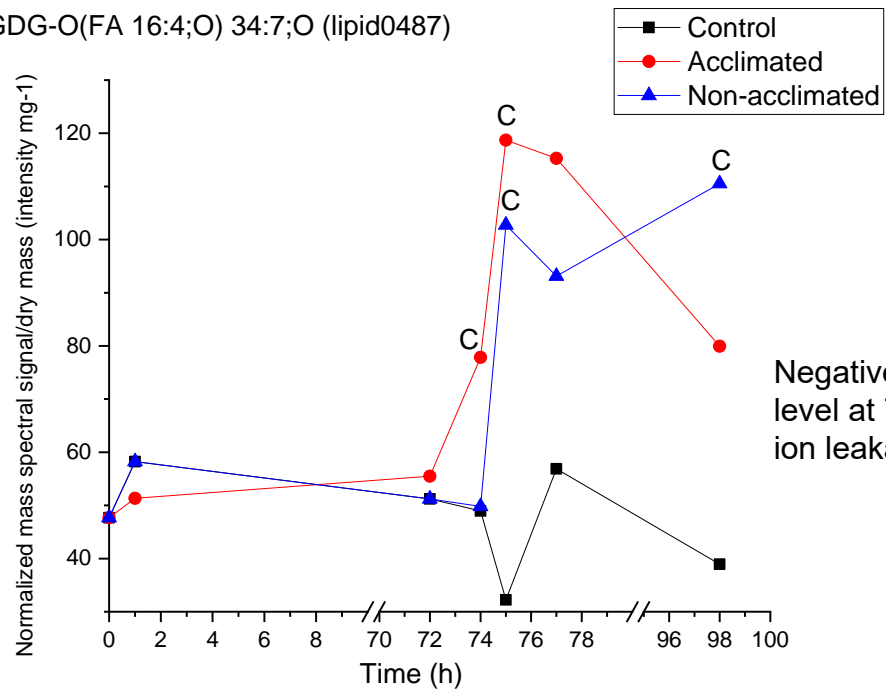

MGDG-O(FA 16:4;O) 34:8;O2 or MGDG-O(FA 16:4;O) 36:6 (lipid0489)

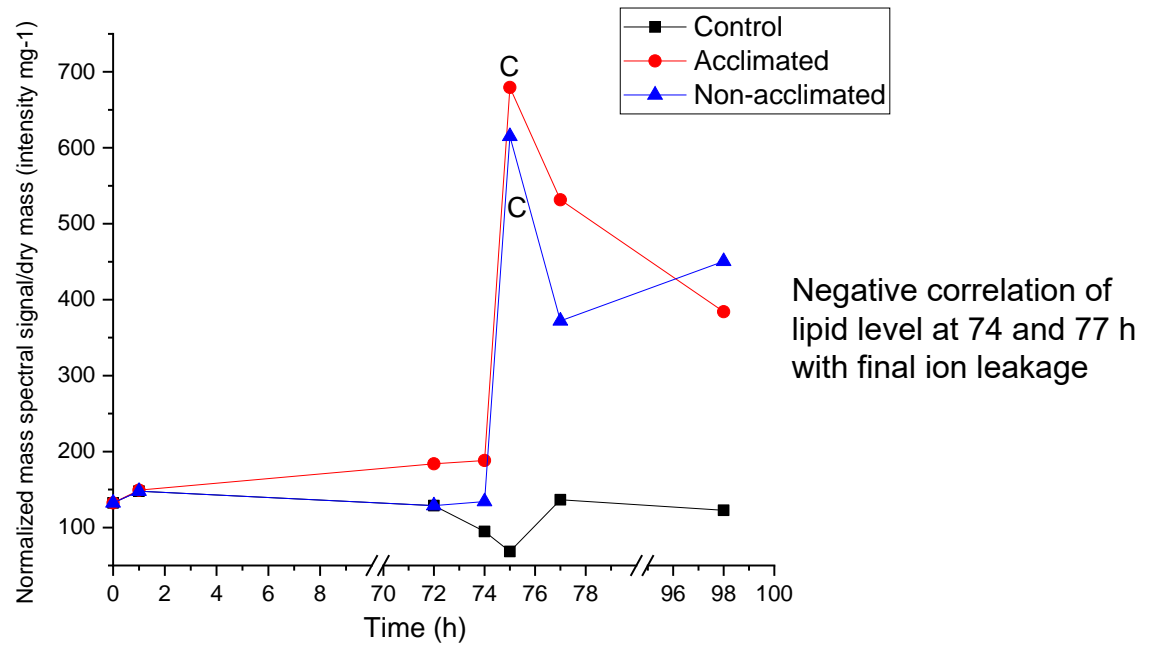

MGDG-O(FA 16:4;O) 36:8;O2 (lipid0495)

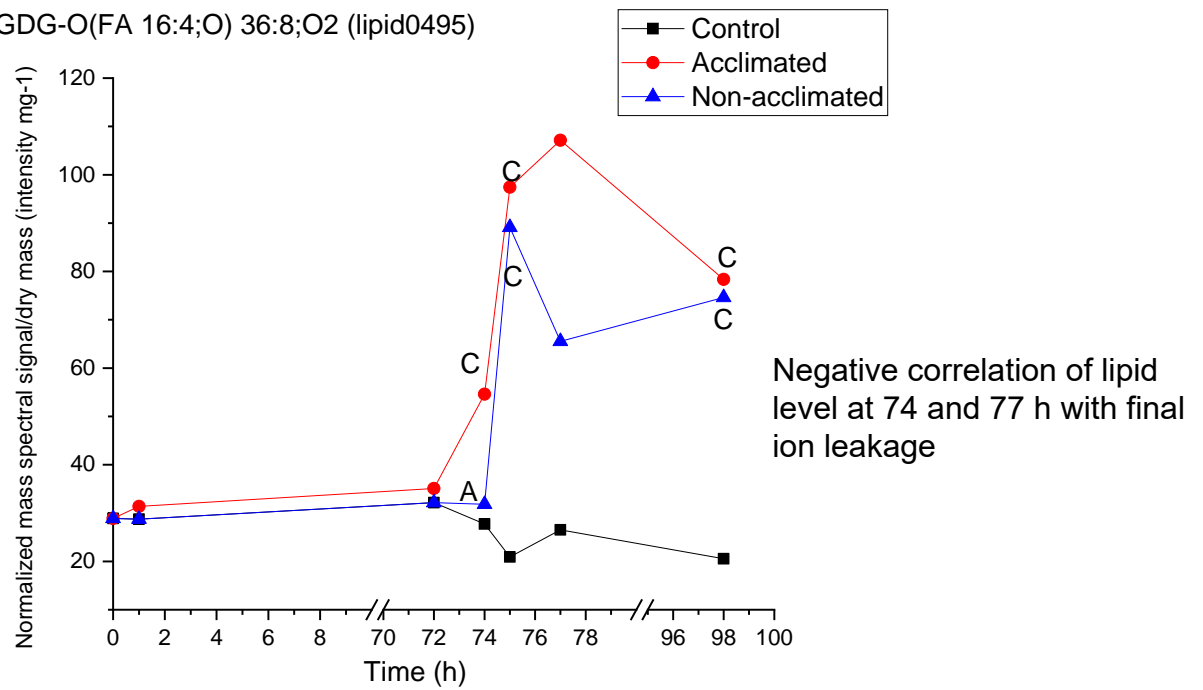

MGDG-O(FA 18:0) 34:7;O (lipid0527)

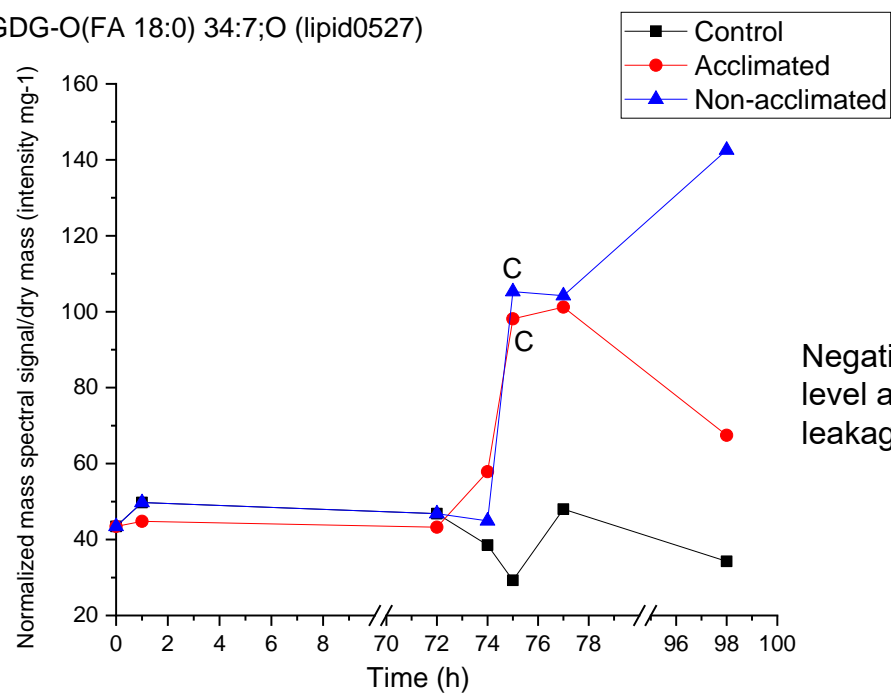

Negative correlation of lipid level at 74 h with final ion leakage

MGDG-O(FA 18:2) 34:7;O (lipid0515)

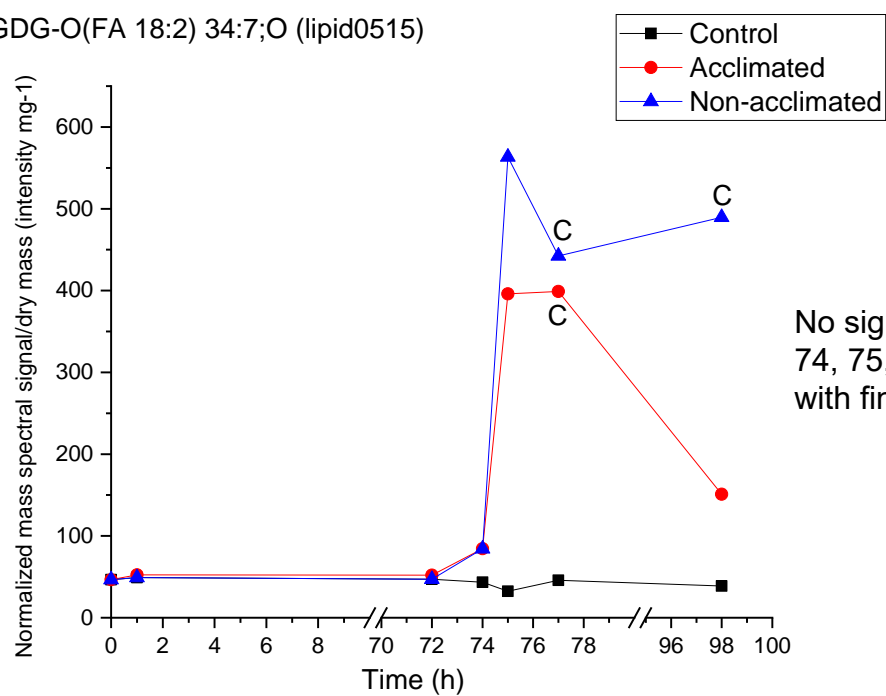

No significant correlation of 74, 75, and 77 h lipid levels with final ion leakage

MGDG-O(FA 18:2) 36:8;O2 (lipid0518)

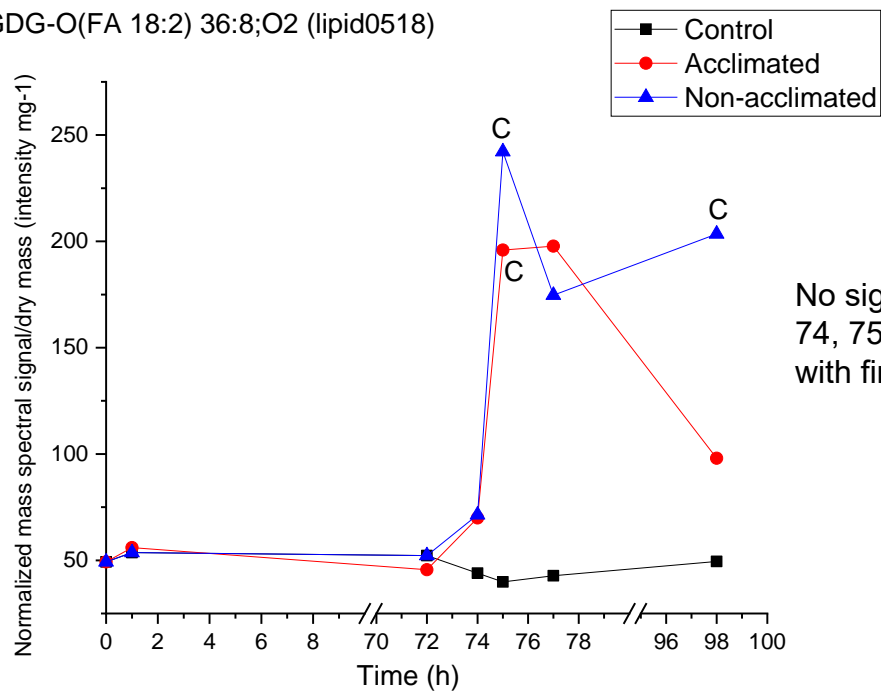

No significant correlation of 74, 75, and 77 h lipid levels with final ion leakage

MGDG-O(FA 18:2;O) 36:6 or MGDG-O(FA 18:2;O) 34:8;O2 (lipid0551)

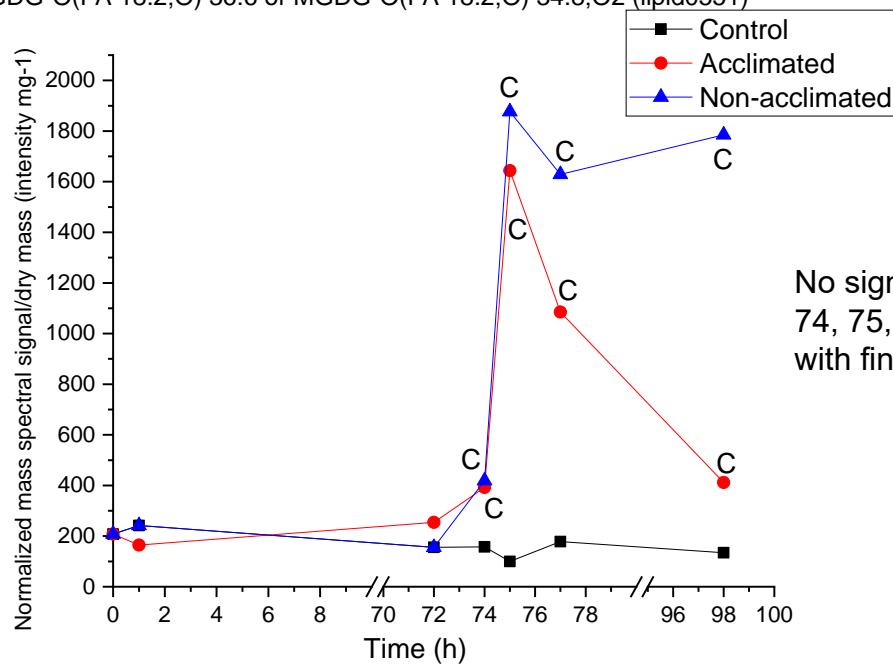

No significant correlation of 74, 75, and 77 h lipid levels with final ion leakage

MGDG-O(FA 18:2;O) 36:8;O2 (lipid0553)

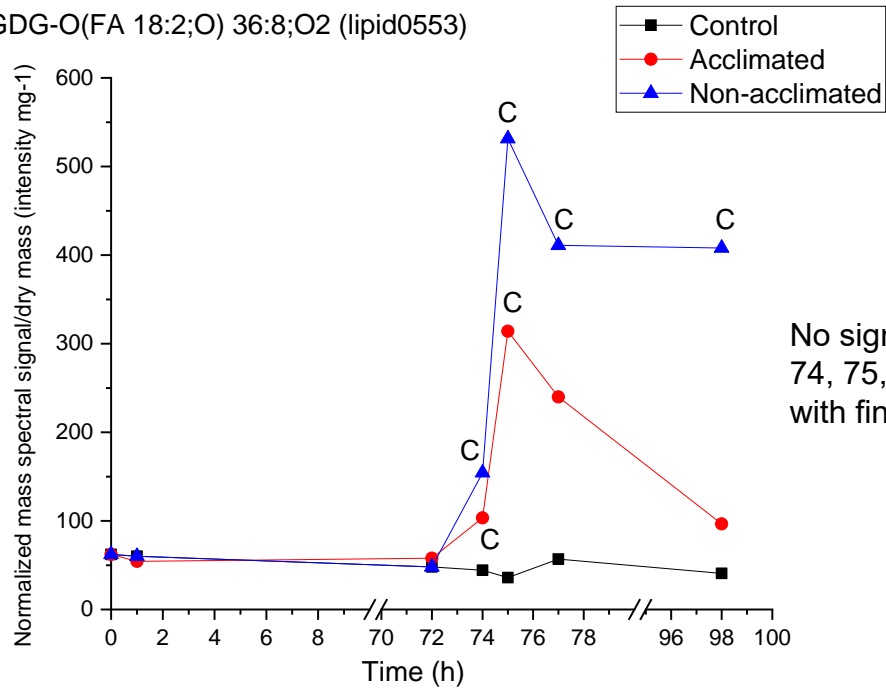

MGDG-O(FA 18:2;O3) 36:6 or MGDG-O(FA 18:2;O3) 34:8;O2 (lipid0596)

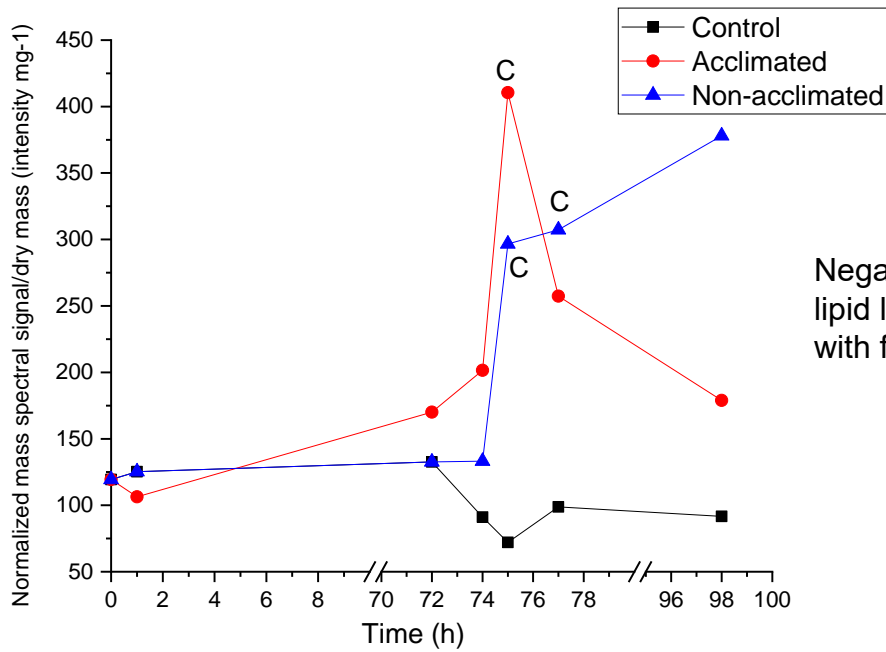

MGDG-O(FA 18:3) 34:7;O (lipid0503)

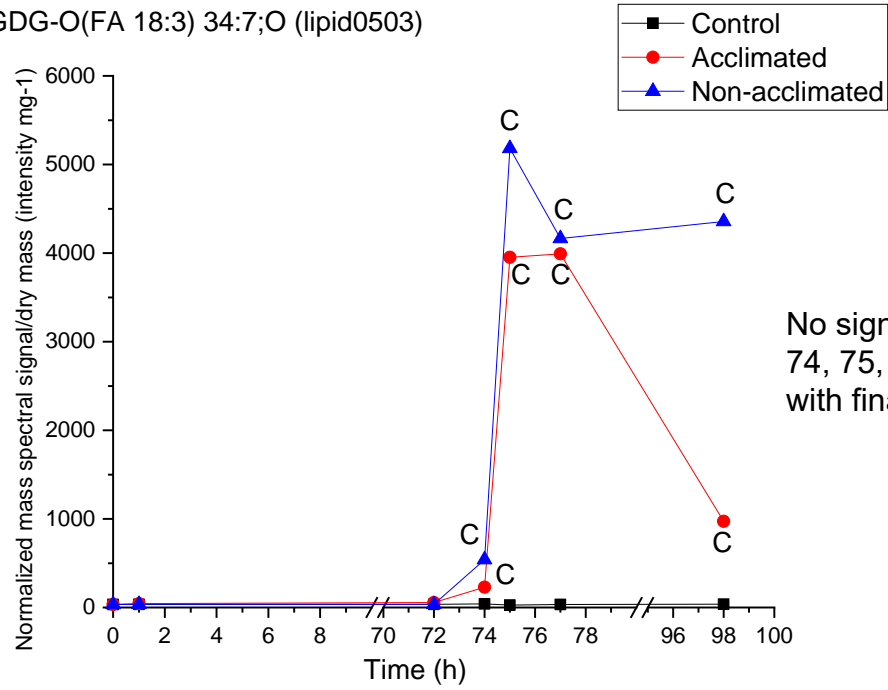

No significant correlation of 74, 75, and 77 h lipid levels with final ion leakage

MGDG-O(FA 18:3) 36:7;O (lipid0508)

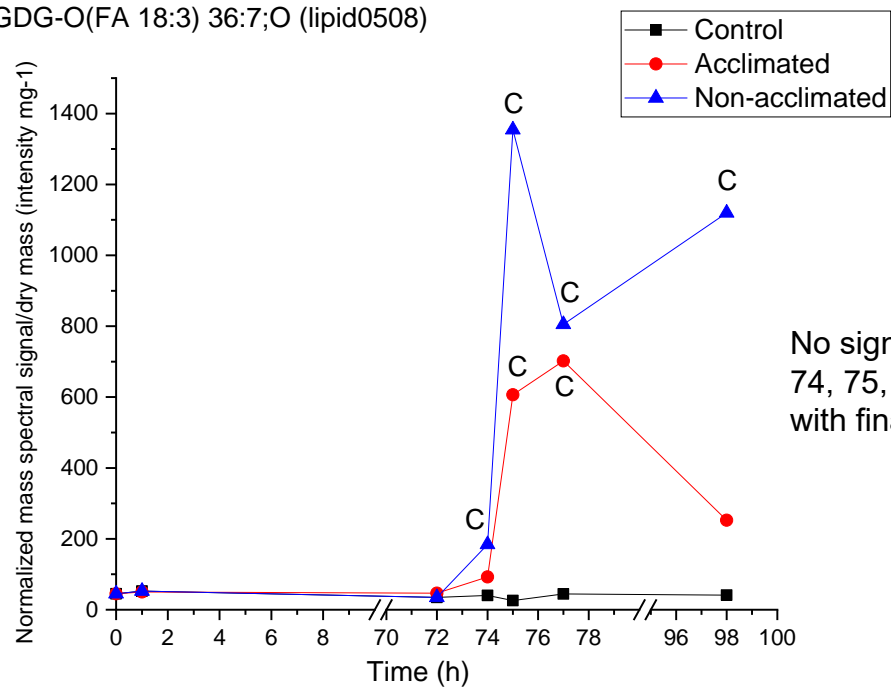

No significant correlation of 74, 75, and 77 h lipid levels with final ion leakage

MGDG-O(FA 18:3) 36:8;O2 (lipid0512)

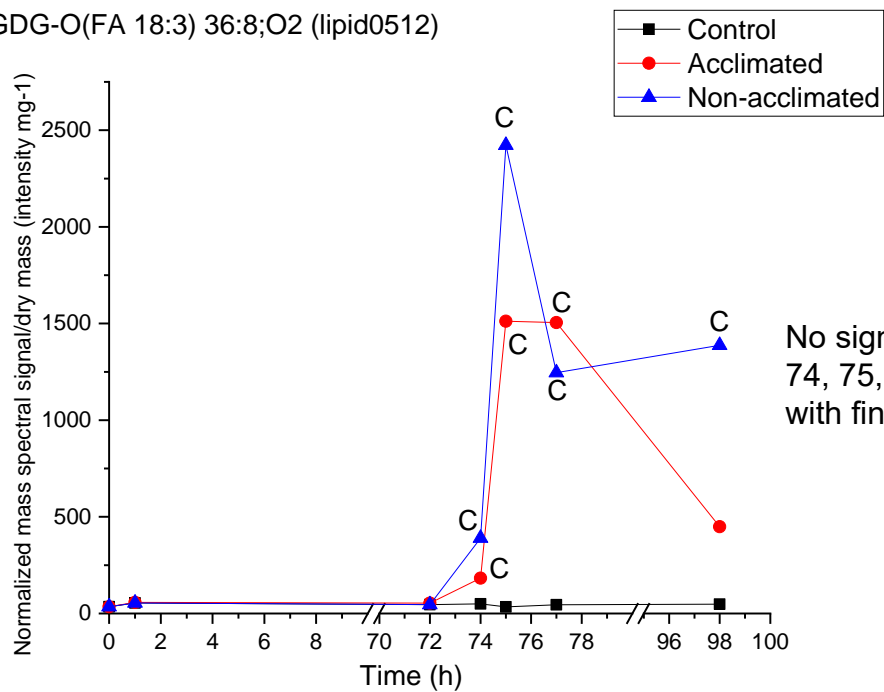

No significant correlation of 74, 75, and 77 h lipid levels with final ion leakage

MGDG-O(FA 18:3;O) 34:6 (lipid0542)

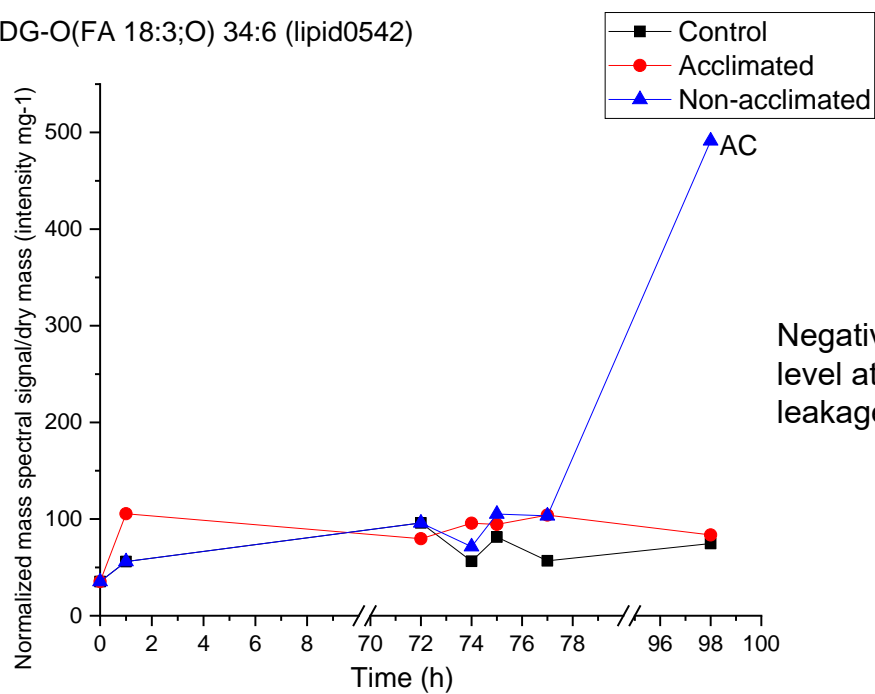

Negative correlation of lipid level at 74 h with final ion leakage

MGDG-O(FA 18:3;O) 34:7;O (lipid0543)

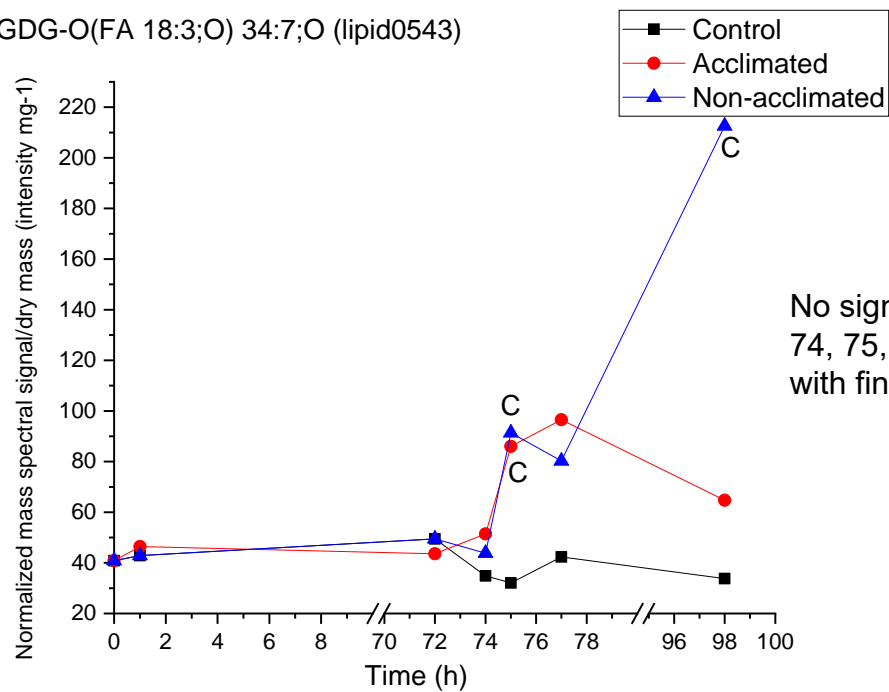

No significant correlation of 74, 75, and 77 h lipid levels with final ion leakage

MGDG-O(FA 18:3;O) 36:6 or MGDG-O(FA 18:3;O) 34:8;O2 (lipid0544)

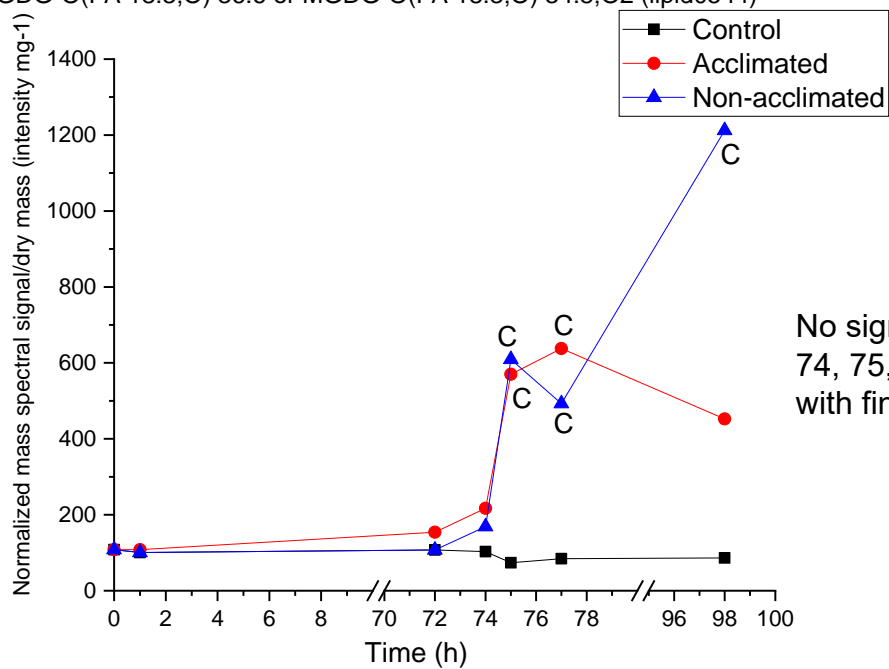

No significant correlation of 74, 75, and 77 h lipid levels with final ion leakage



MGDG-O(FA 18:3;O) 36:6;O (lipid0546)

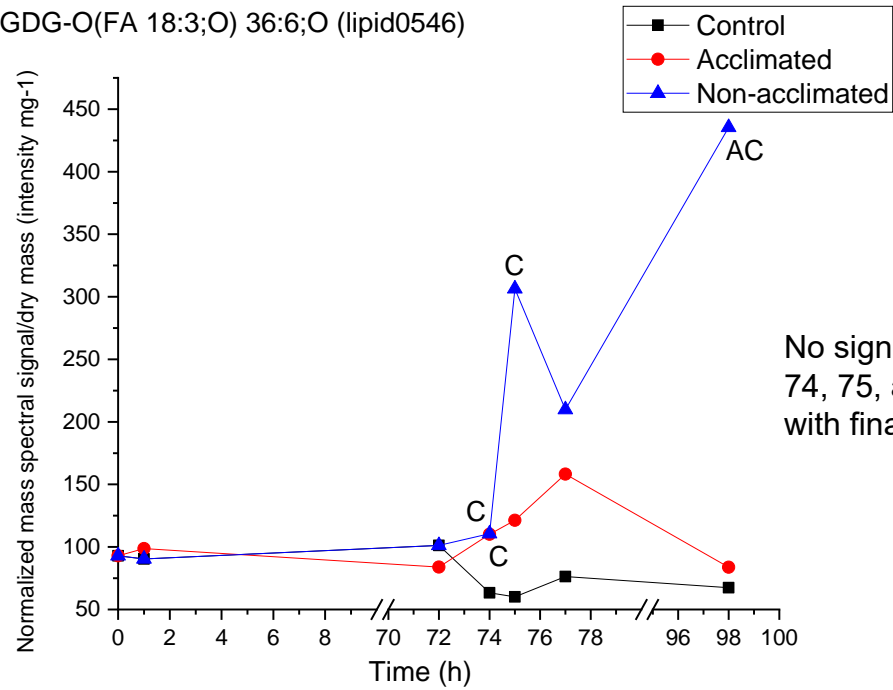

MGDG-O(FA 18:3;O) 36:8;O2 (lipid0548)

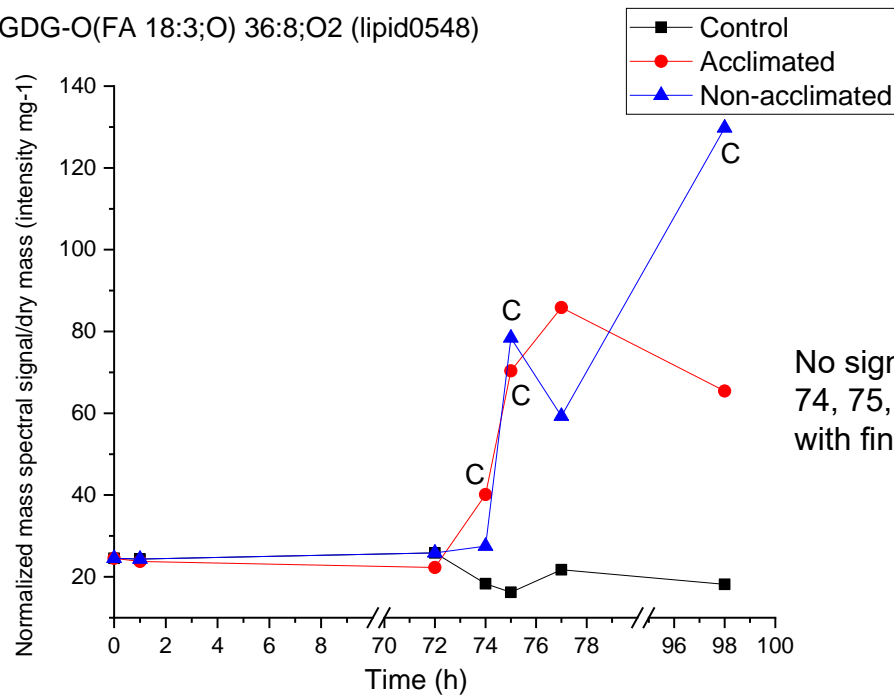

MGDG-O(FA 18:3;O2) 34:6 (lipid0566)

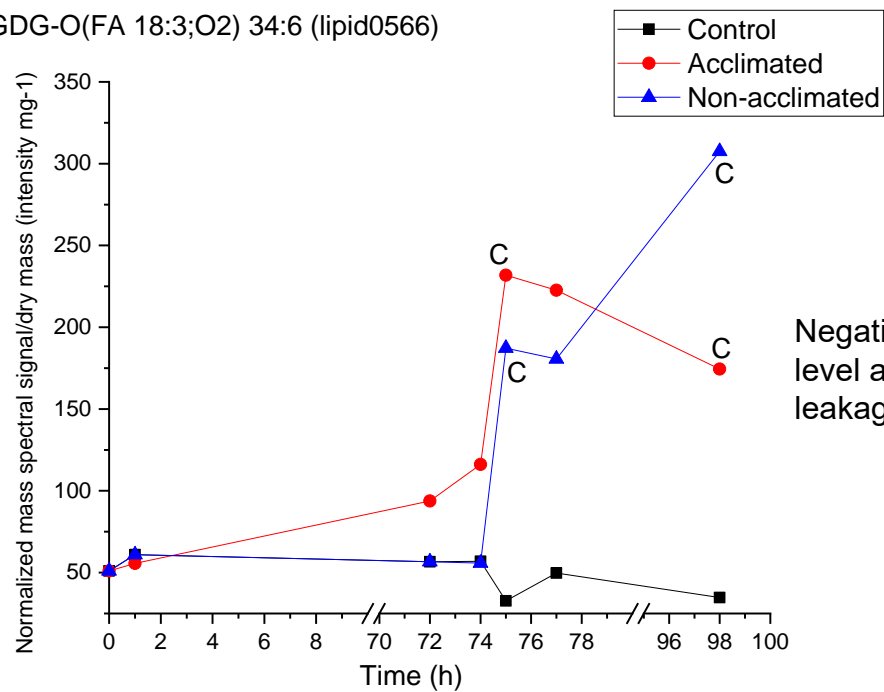

MGDG-O(FA 18:3;O2) 36:6 or MGDG-O(FA 18:3;O2) 34:8;O2 (lipid0570)

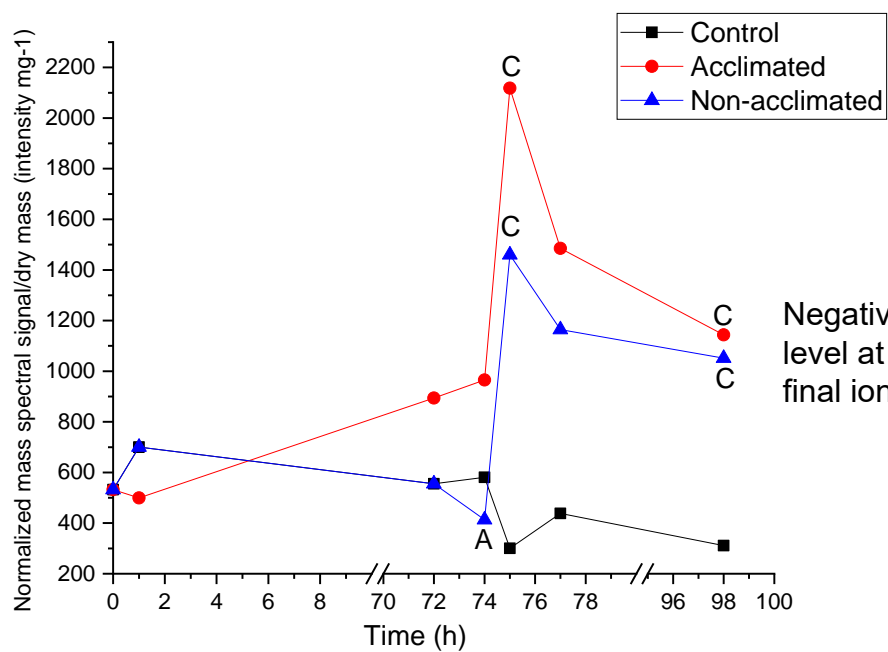

MGDG-O(FA 18:3;O2) 36:8;O2 (lipid0580)

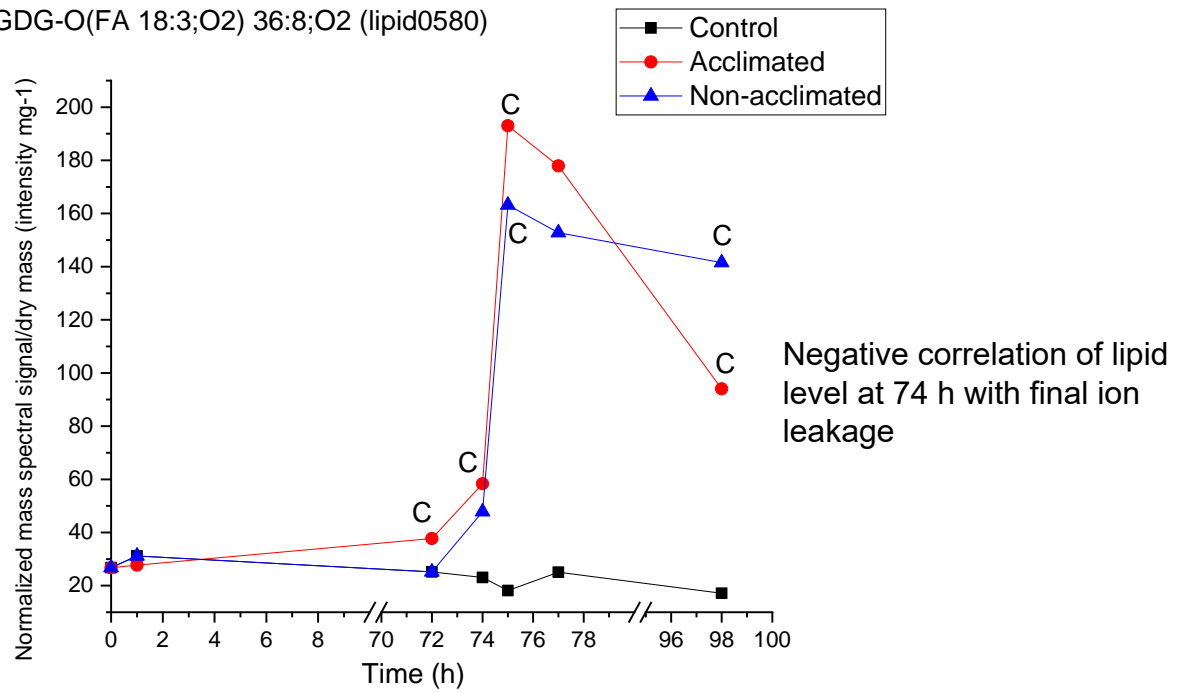

MGDG-O(FA 18:3;O3) 34:6 (lipid0591)

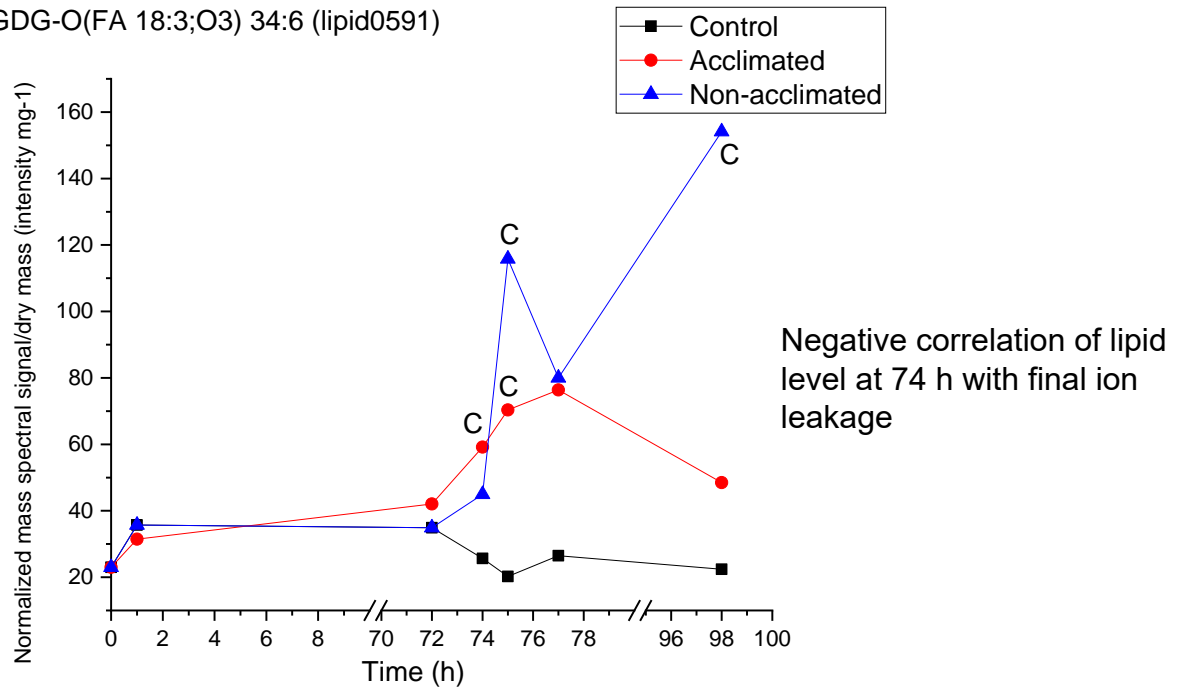

MGDG-O(FA 18:3;O3) 34:7;O (lipid0592)

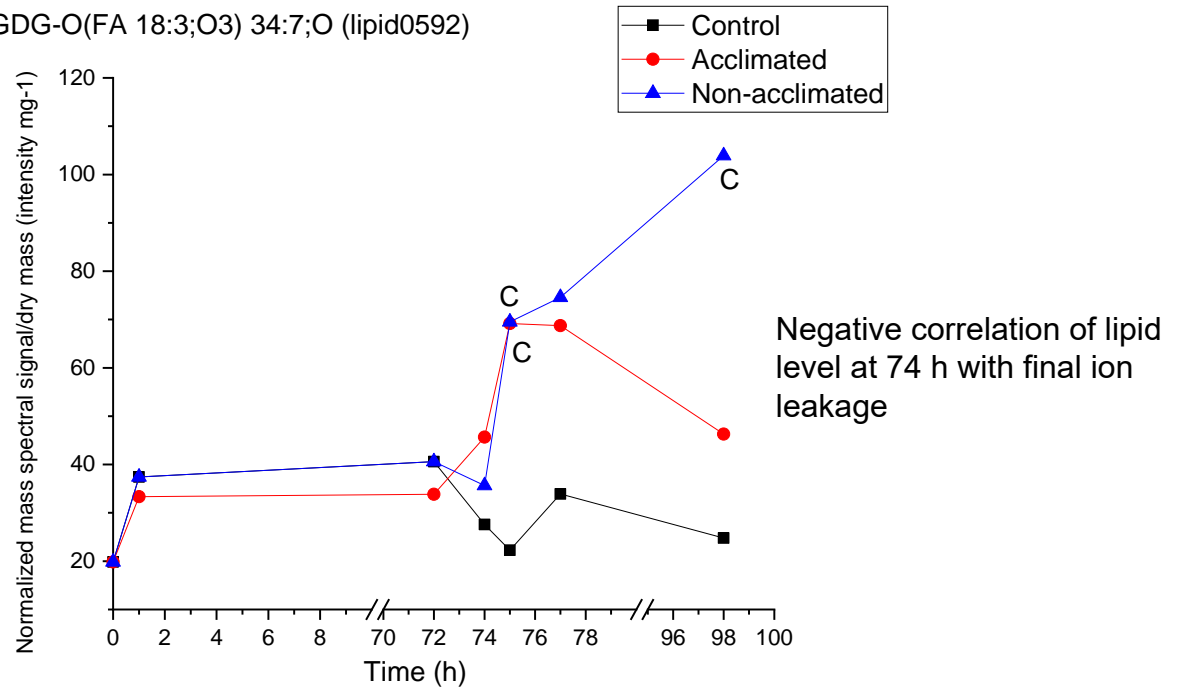

MGDG-O(FA 18:3;O3) 36:8;O2 (lipid0595)

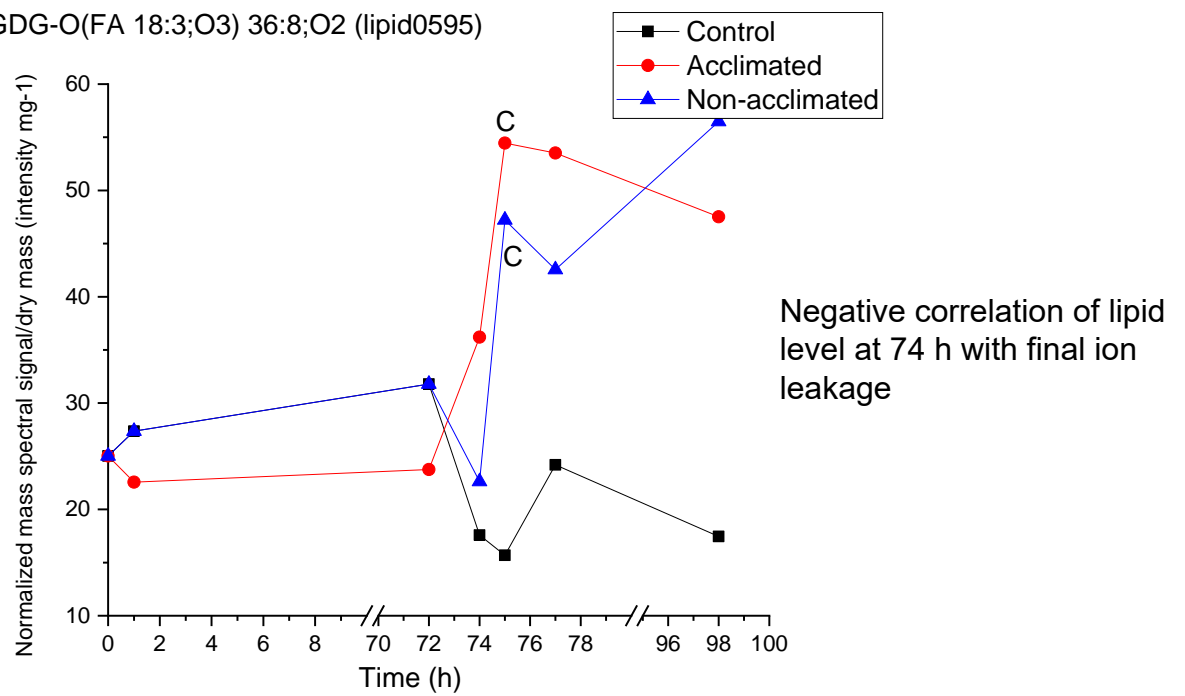



MGDG-O(FA 18:4;O) 34:8;O2 (Arabidopsis E or MGDG-O(FA 18:4;O) 36:6) (lipid0535)

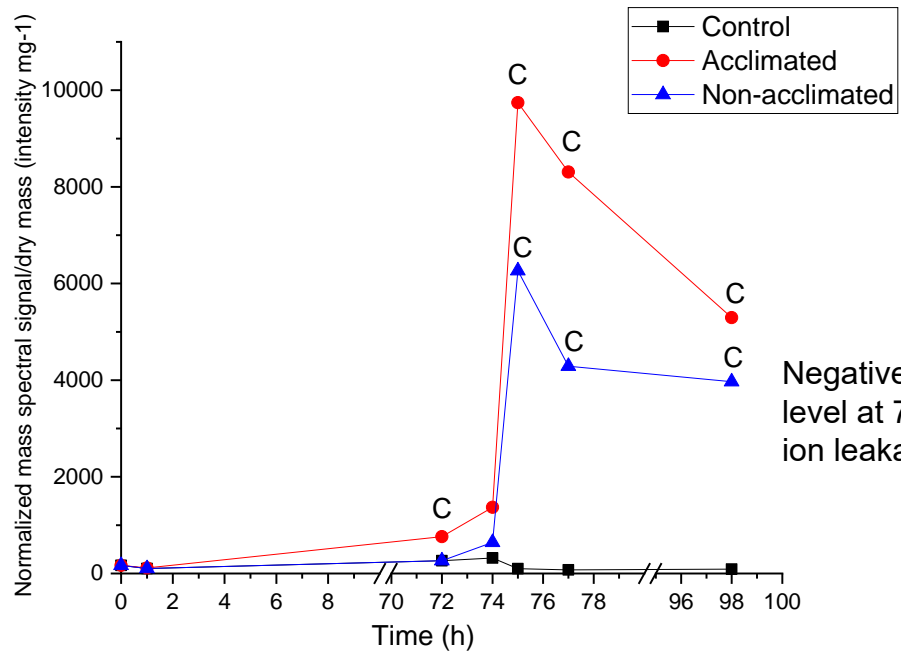

MGDG-O(FA 18:4;O) 36:6;O or MGDG-O(FA 18:4;O) 34:8;O3 (lipid0538)

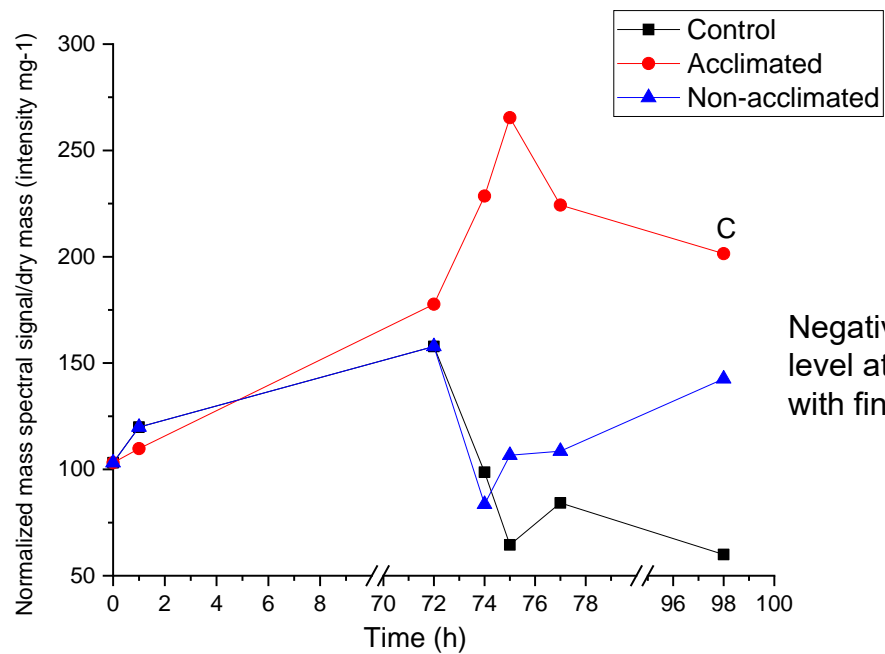

MGDG-O(FA 18:4;O) 36:7;O (lipid0537)

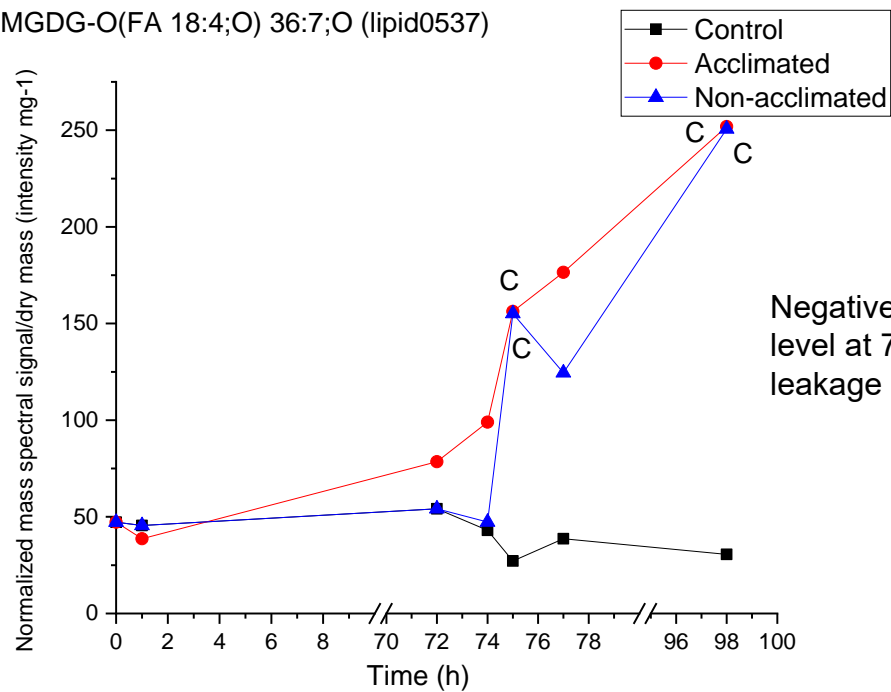

MGDG-O(FA 18:4;O) 36:7;O2 (alternative fragmentation) (lipid0575)

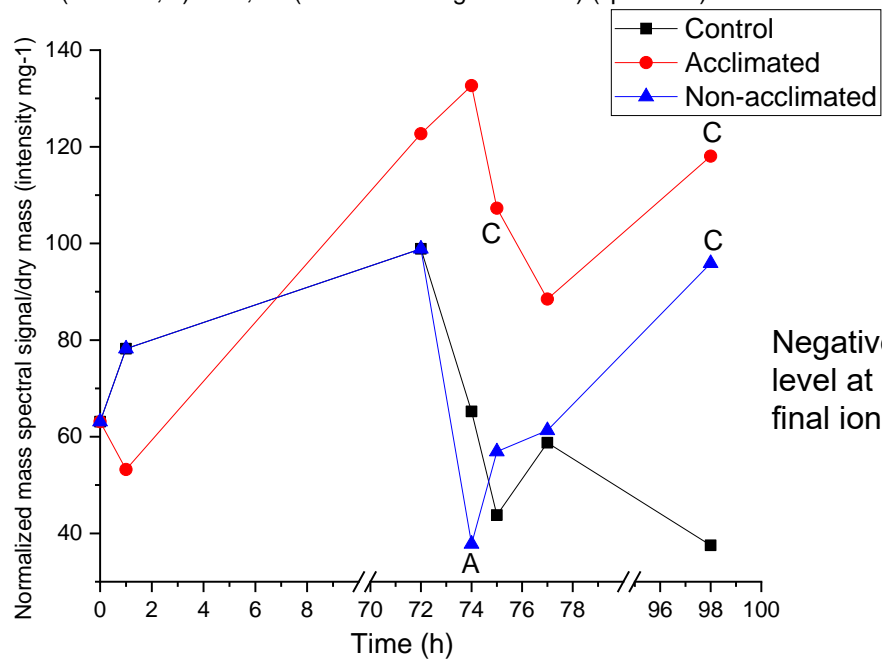

MGDG-O(FA 18:4;O) 36:8;O2 (alternative fragmentation; Arabidopsis G) (lipid0574)

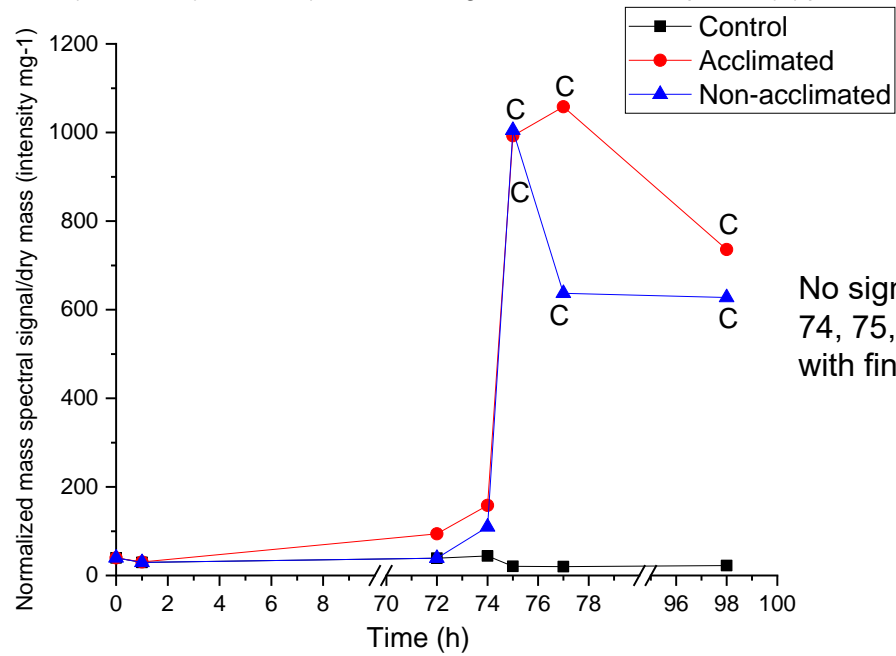

MGDG-O(FA 18:4;O) 36:8;O2 (Arabidopsis G) (lipid0540)

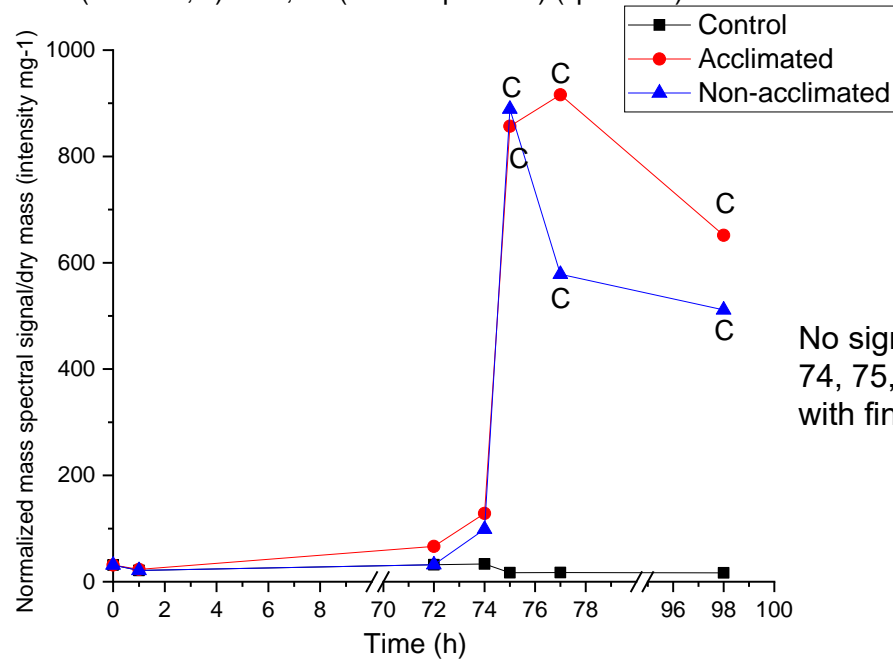



MGDG-O(FA 18:4;O) 38:4 or MGDG-O(FA 18:4;O) 36:6;O2 (lipid0541)

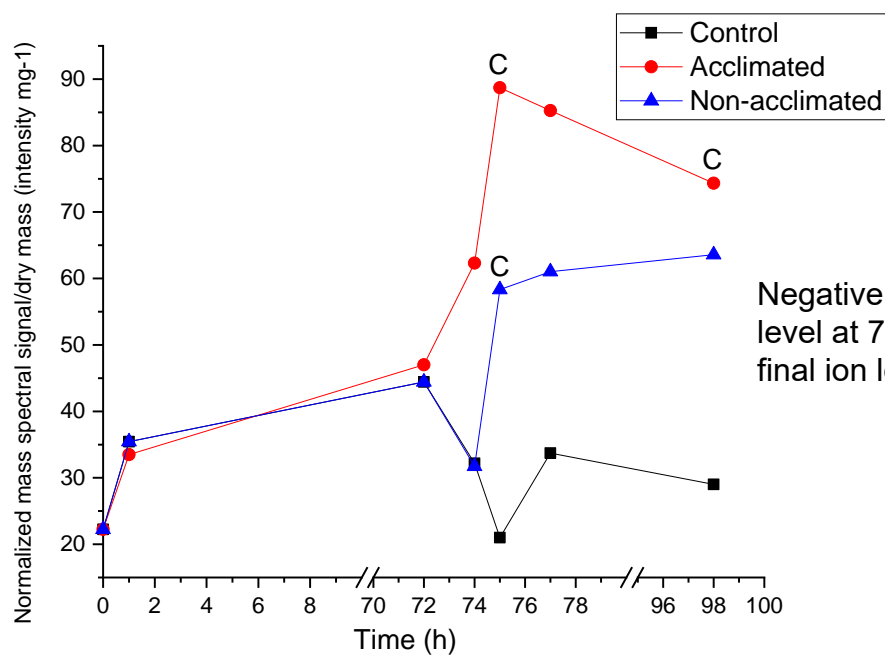

Negative correlation of lipid level at 74, 75, and 77 h with final ion leakage

MGDG-O(FA 18:4;O2) 34:6 (lipid0559)

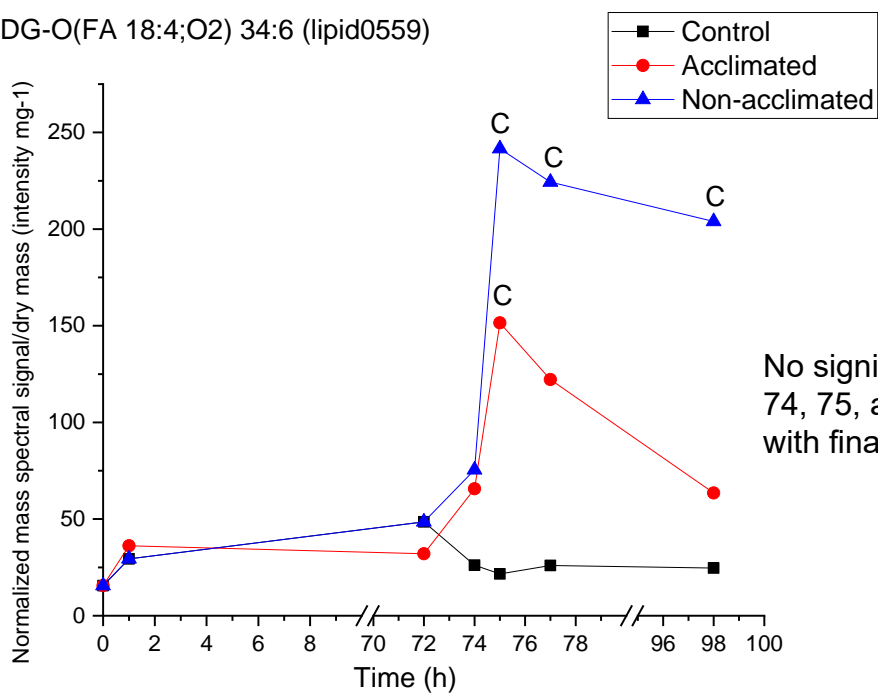

No significant correlation of 74, 75, and 77 h lipid levels with final ion leakage

MGDG-O(FA 18:4;O2) 34:7;O (lipid0560)

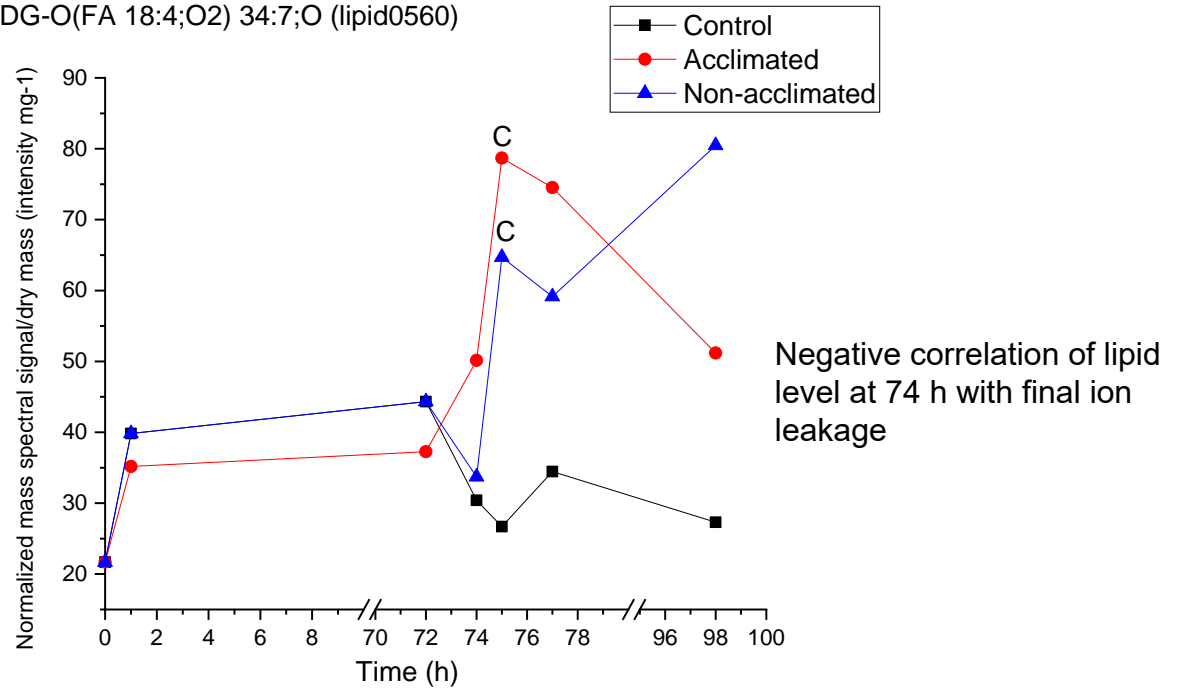

MGDG-O(FA 18:4;O2) 36:6 or MGDG-O(FA 18:4;O2) 34:8;O2 (lipid0561)

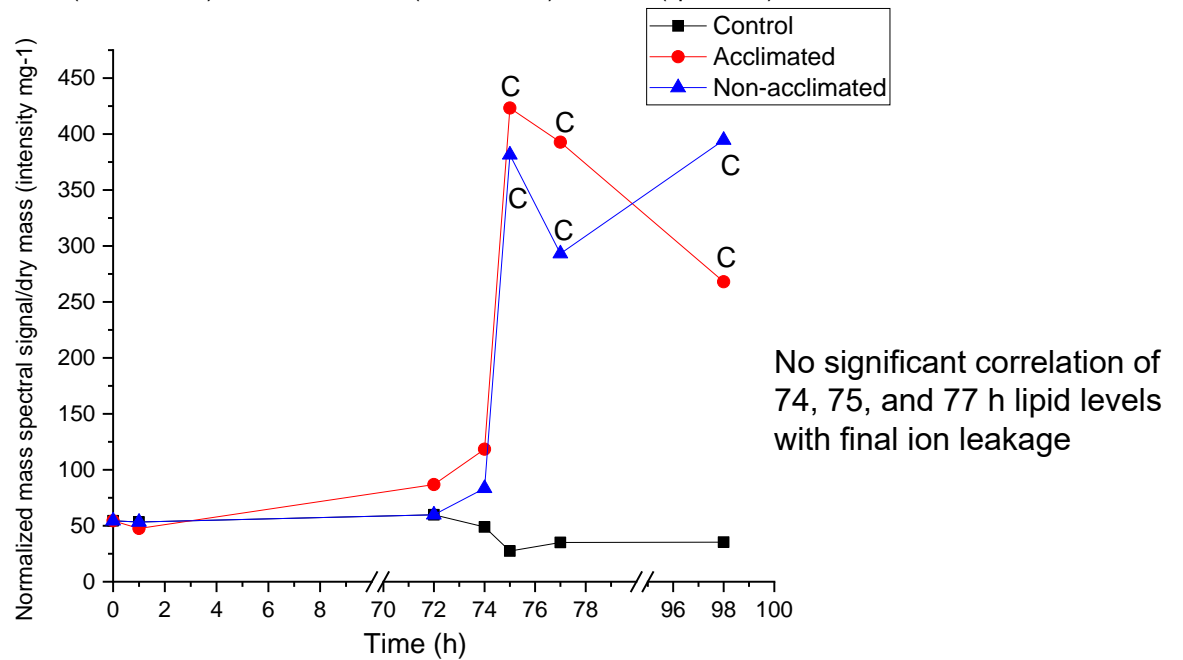

MGDG-O(FA 18:4;O2) 36:8;O2 (lipid0565)

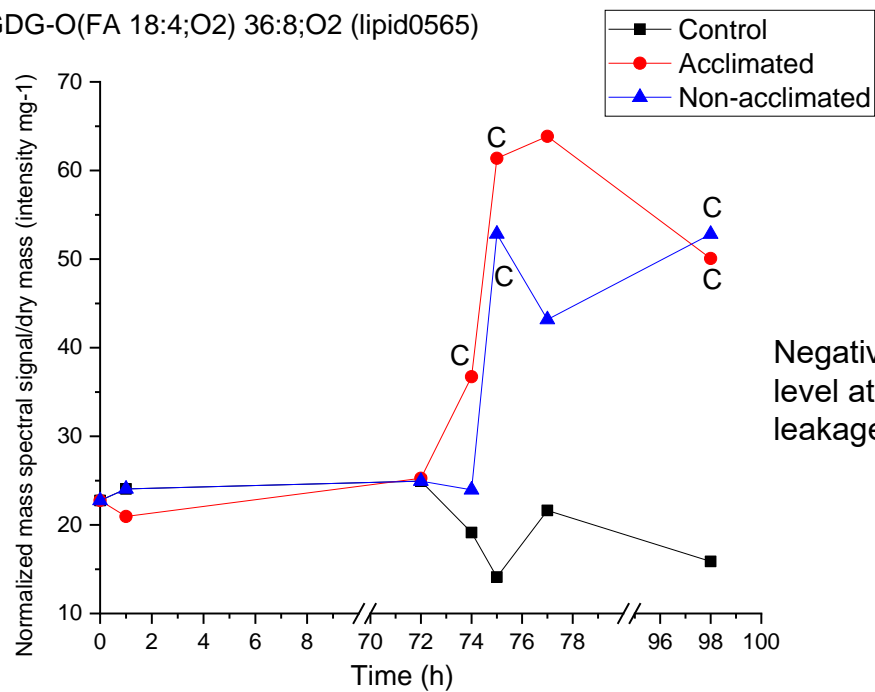

MGDG-O(FA 18:4;O3) 34:6 (lipid0586)

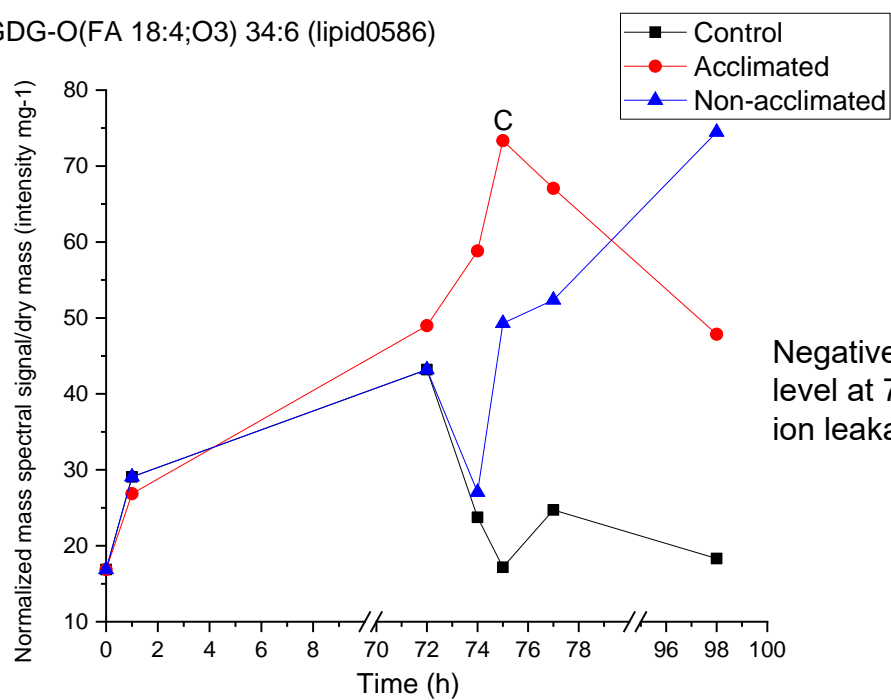

MGDG-O(FA 18:4;O3) 34:7;O (lipid0587)

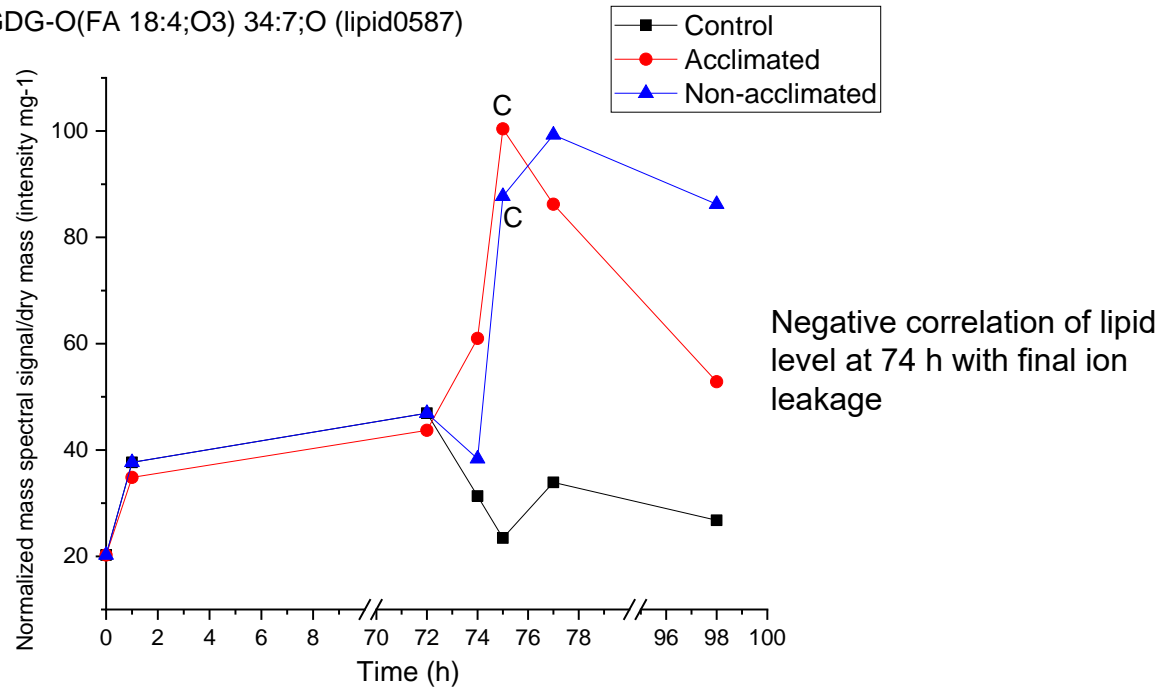

MGDG-O(FA 18:4;O3) 36:6 or MGDG-O(FA 18:4;O3) 34:8;O2 (lipid0588)

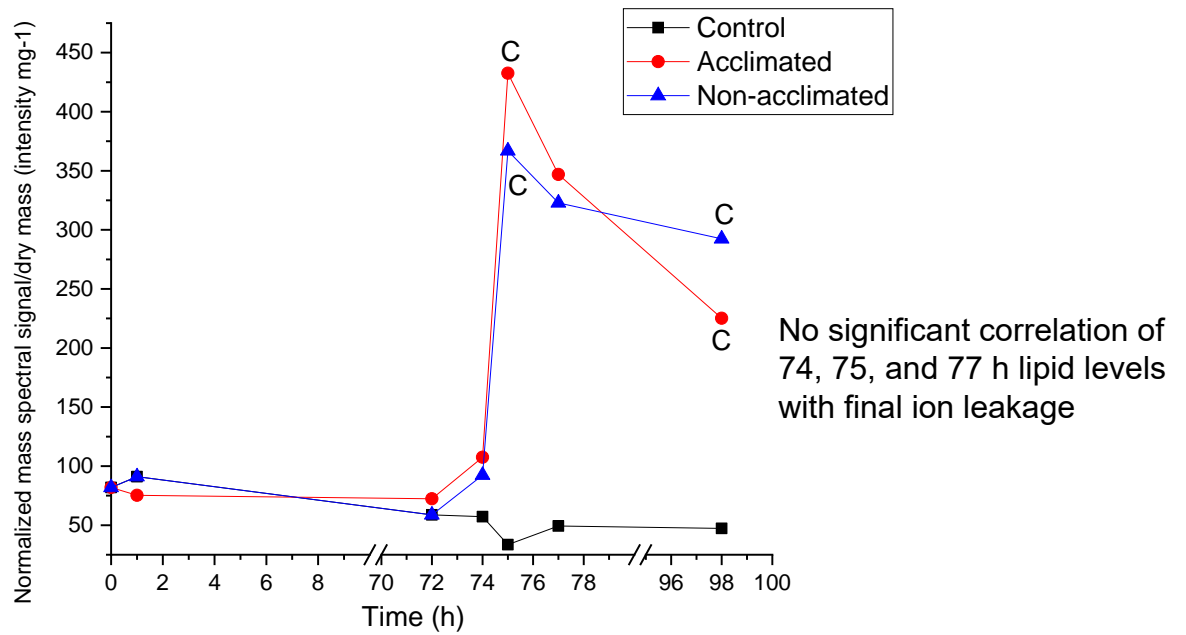

MGDG-O(FA 18:5;O2) 36:6 or MGDG-O(FA 18:5;O2) 34:8;O2 (lipid0556)

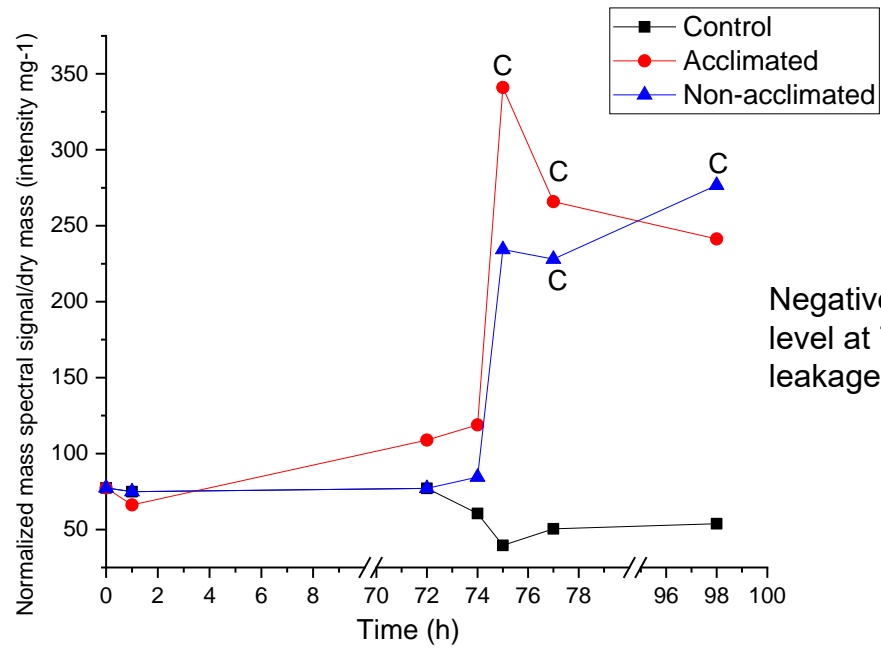

MGDG-O(FA 18:5;O2) 36:8;O2 (lipid0558)

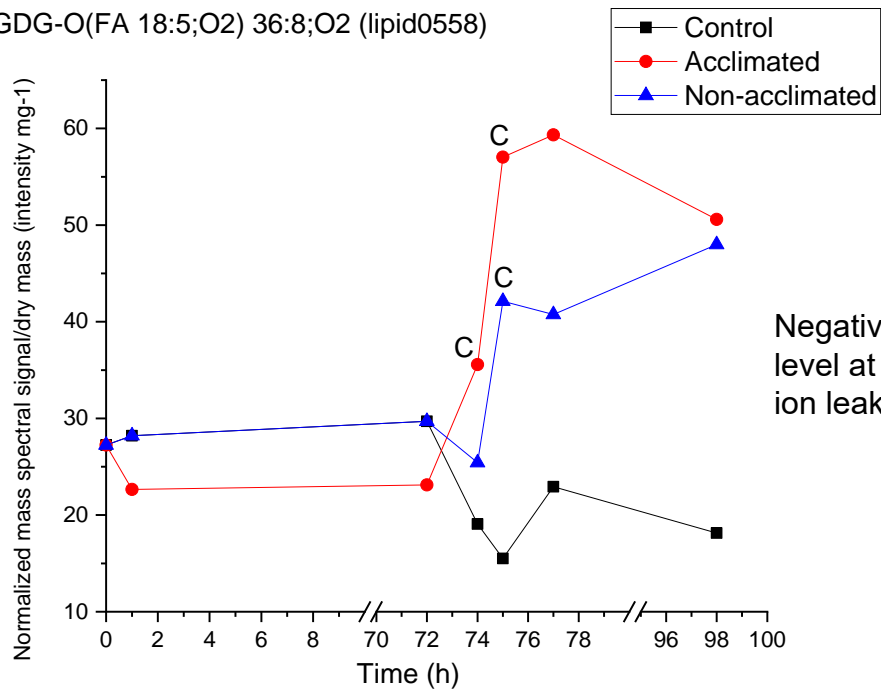

PG-O(FA 16:1) 36:8;O2\*\* (lipid0293)

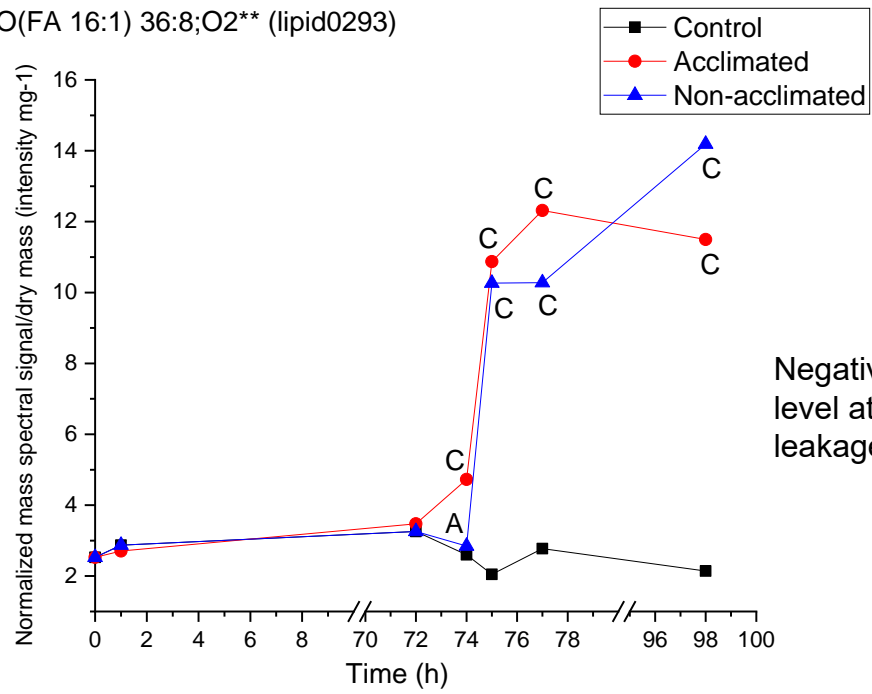

Ambiguous (with respect to oxidation), acylated chloroplast lipids

MGDG-O(FA 16:0) 36:6 or MGDG-O(FA 16:0) 34:8;O<sub>2</sub> (lipid0476)

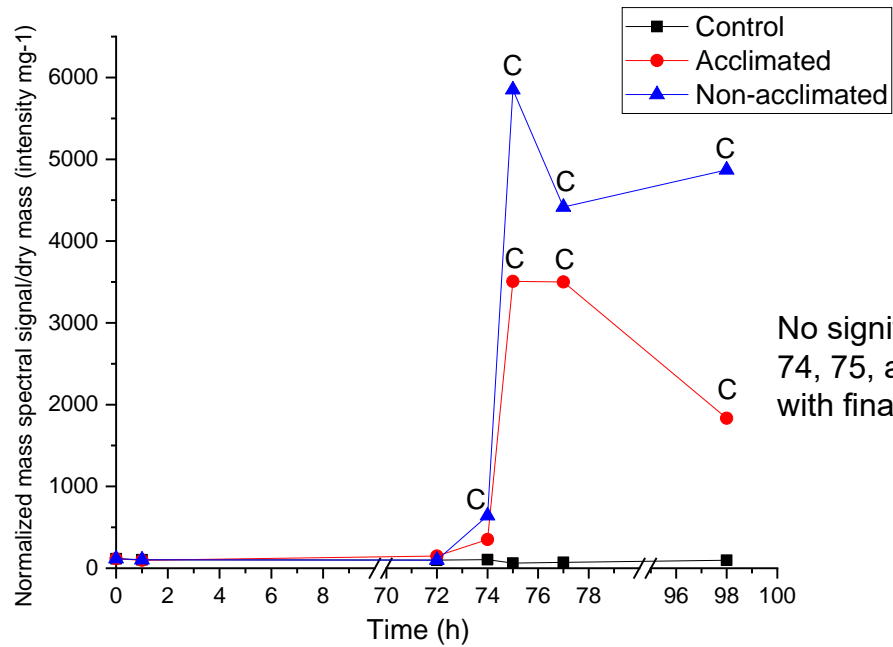

MGDG-O(FA 16:1) 36:6 or MGDG-O(FA 16:1) 34:8;O<sub>2</sub> (lipid0468)

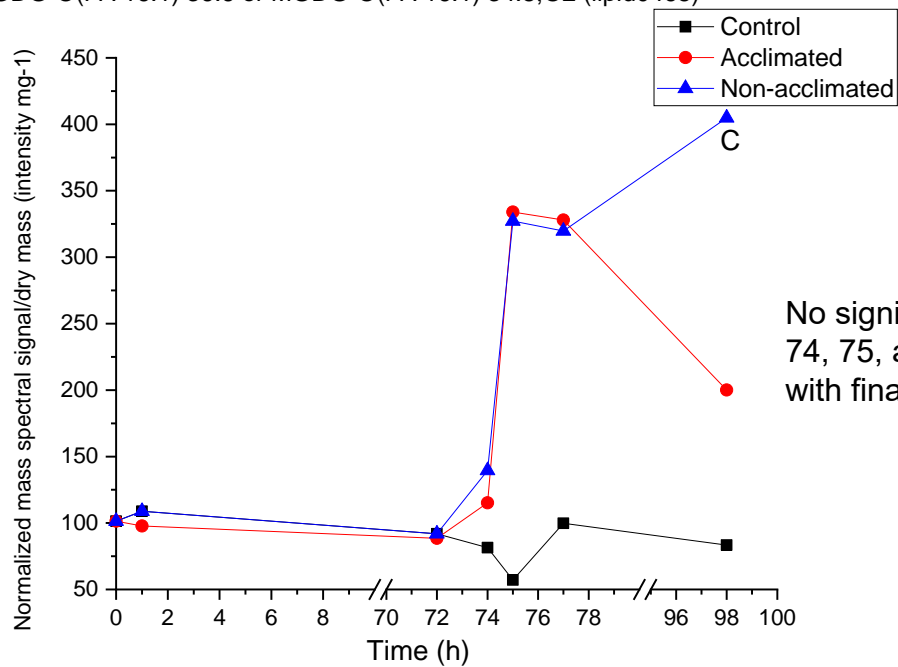

MGDG-O(FA 16:2) 36:6 or MGDG-O(FA 16:2) 34:8;O2 (lipid0461)

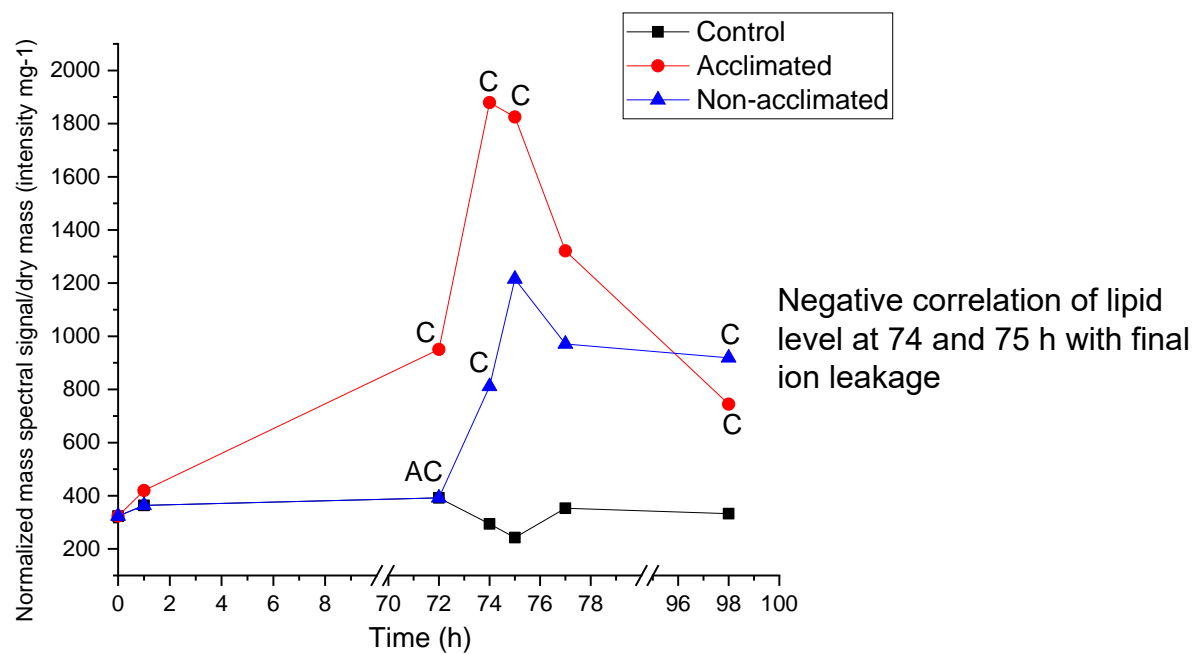

MGDG-O(FA 16:3) 36:6 or MGDG-O(FA 16:3) 34:8;O2 (lipid0454)

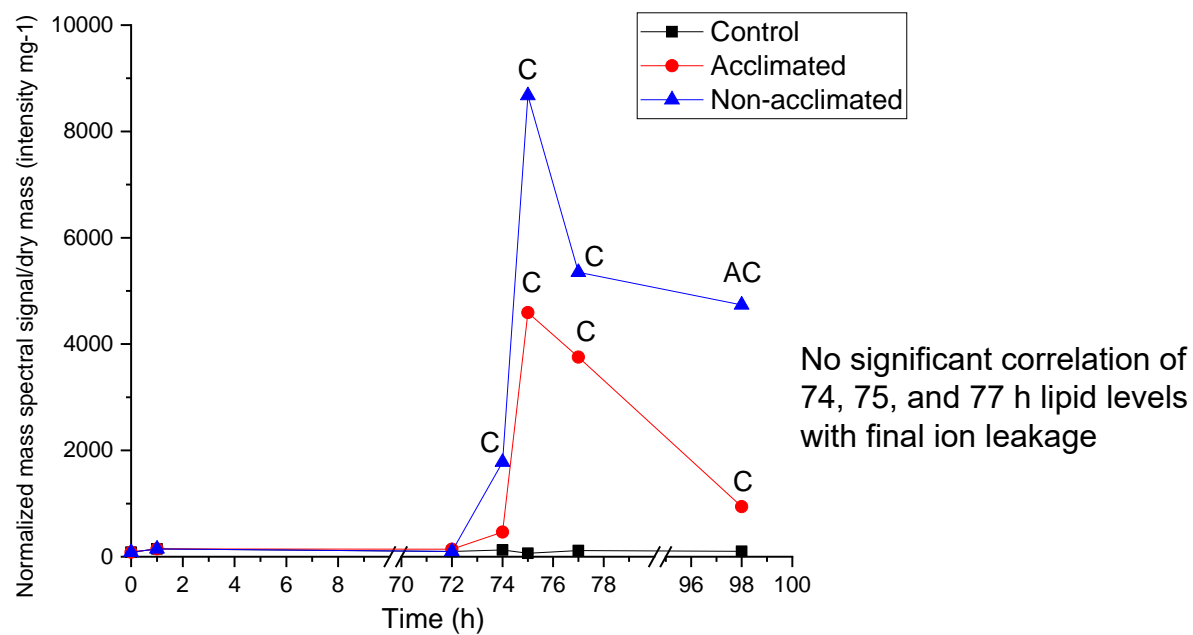



MGDG-O(FA 16:3;O2) 34:6 or MGDG-O(FA 18:1) 34:6 (lipid0519)

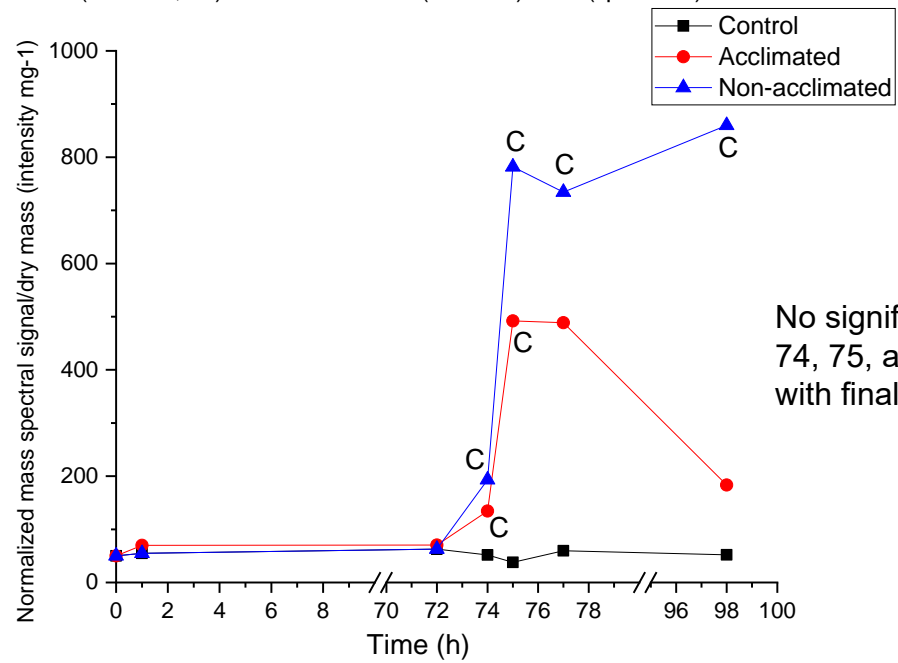

MGDG-O(FA 16:3;O2) 36:6 or MGDG-O(FA 16:3;O2) 34:8;O2  
or MGDG-O(FA 18:1) 36:6 or MGDG-O(FA 18:1) 34:8;O2 (lipid0522)

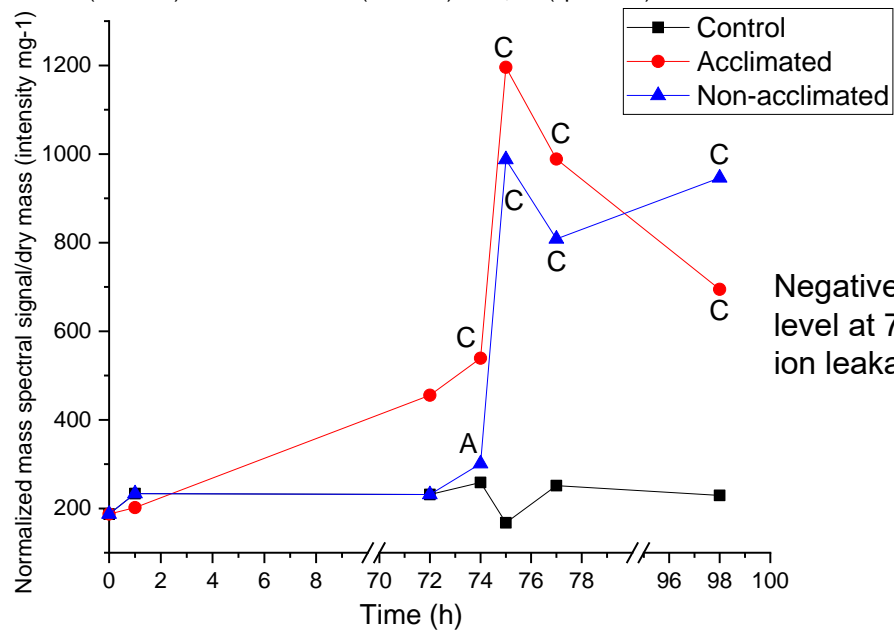

MGDG-O(FA 16:3;O2) 36:8;O2 or MGDG-O(FA 18:1) 36:8;O2 (lipid0525)

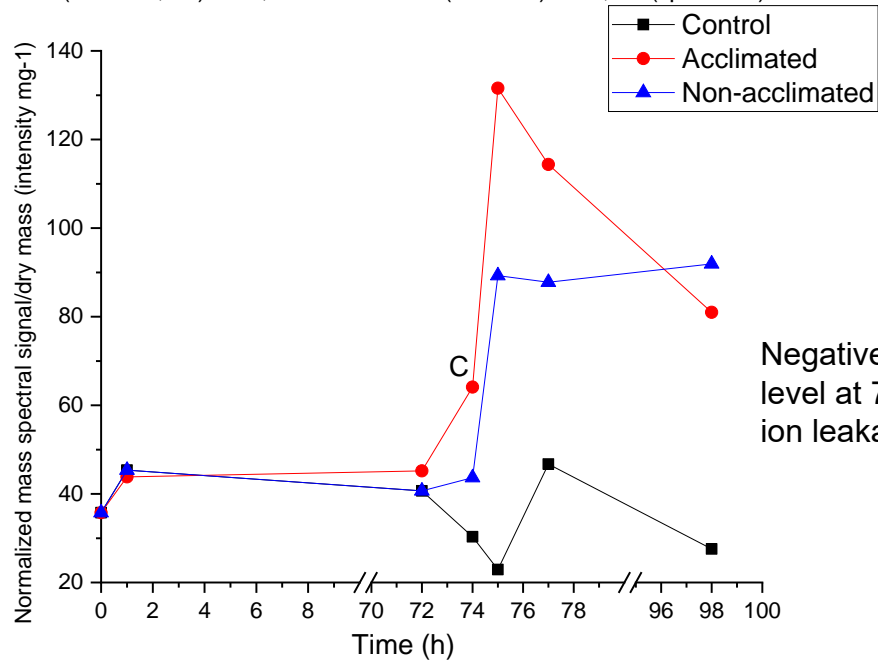

MGDG-O(FA 18:0) 34:8;O2 or MGDG-O(FA 18:0) 36:6 (lipid0528)

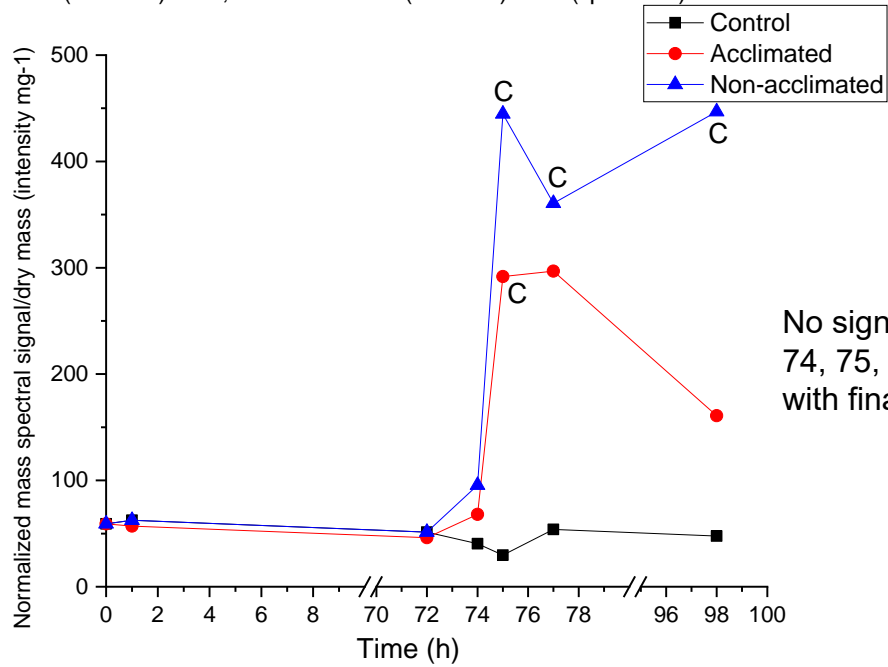

MGDG-O(FA 18:2) 36:6 or MGDG-O(FA 18:2) 34:8;O2 (lipid0516)

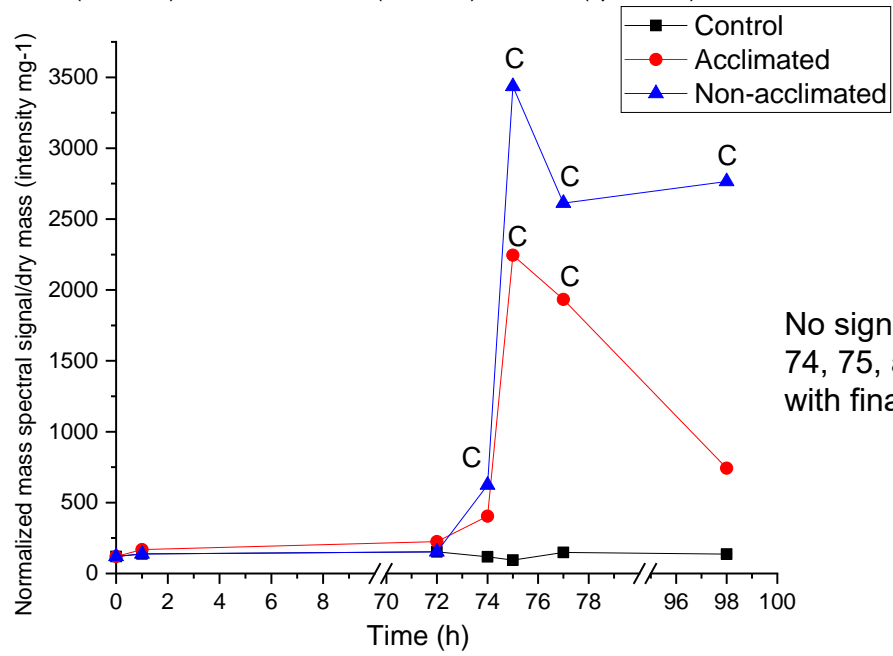

MGDG-O(FA 18:3) 34:7;O2 or MGDG-O(FA 18:3) 36:5 (lipid0506)

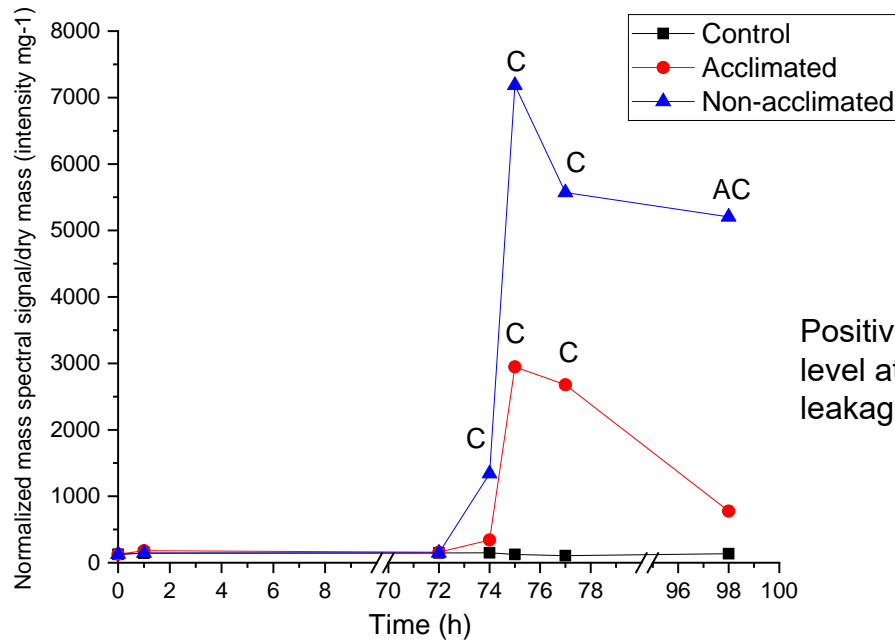

MGDG-O(FA 18:3) 36:6 or MGDG-O(FA 18:3) 34:8;O2 (lipid0505)

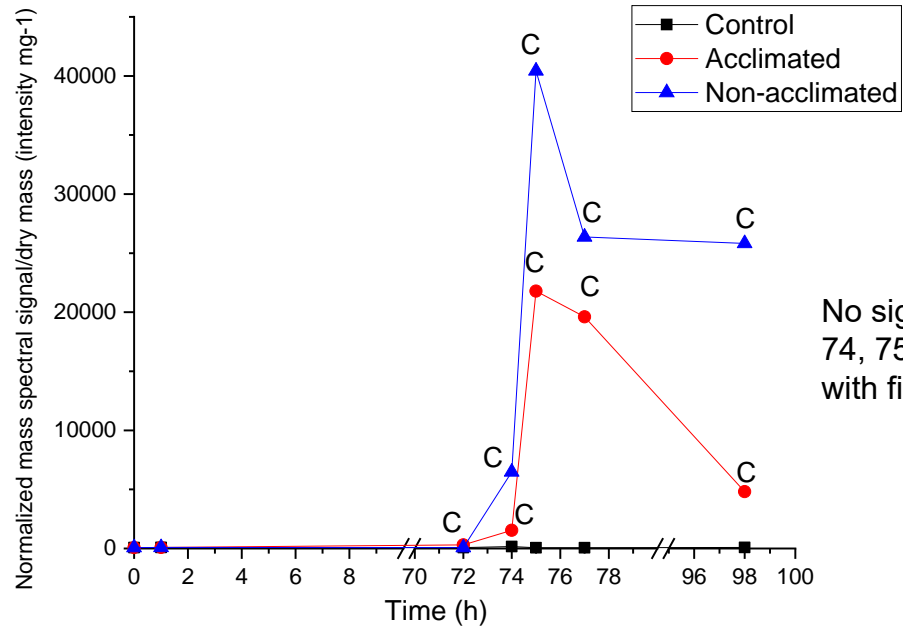

Figure S6. Time courses of levels of selected oxidized polar lipids in rosettes of control, non-acclimated, and acclimated plants. Treatments are shown in Figure 1. Asterisks indicate lipids with quality control (pooled sample) levels less than 0.75 (\*) or 0.25 (\*\*) units of normalized mass spectral intensity, where 1 = intensity of 1 pmol of internal standard. "C" indicates that the lipid level in non-acclimated or acclimated plants is significantly different than the control level, and "A" indicates that the lipid level in non-acclimated plants is significantly different than the level in acclimated plants (Table S2). Indicated on each plot is whether there is significant correlation of lipid level at the 74-, 75-, and 77-h time points with final (98 h) ion leakage.

| Lipid number | Panel | Class, oxidation | Lipid name                                   |
|--------------|-------|------------------|----------------------------------------------|
| lipid0632    | 6A    | DGDG, oxidized   | DGDG 16:0_18:3;O*                            |
| lipid0392    | 6A    | DGDG, oxidized   | DGDG 16:0_18:4;O*                            |
| lipid0339    | 6B    | DGDG, oxidized   | DGDG 18:3;O_16:4;O**                         |
| lipid0394    | 6B    | DGDG, oxidized   | DGDG 18:3;O2_16:3*                           |
| lipid0400    | 6C    | DGDG, oxidized   | DGDG 18:3;O2_18:3 or<br>DGDG 18:4;O_18:2;O** |
| lipid0336    | 6C    | DGDG, oxidized   | DGDG 18:3_16:4;O*                            |
| lipid0354    | 6D    | DGDG, oxidized   | DGDG 18:3_18:5;O2                            |
| lipid0387    | 6D    | DGDG, oxidized   | DGDG 18:4;O_16:3*                            |
| lipid0390    | 6E    | DGDG, oxidized   | DGDG 18:4;O_16:3;O*                          |
| lipid0396    | 6E    | DGDG, oxidized   | DGDG 18:4;O_18:3                             |
| lipid0399    | 6F    | DGDG, oxidized   | DGDG 18:4;O_18:3;O**                         |
| lipid0398    | 6F    | DGDG, oxidized   | DGDG 18:4;O_18:4;O<br>(Arabidopside D)*      |
| lipid0402    | 6G    | DGDG, oxidized   | DGDG 18:4;O_18:4;O2 or<br>DGDG 18:4;O_20:2*  |
| lipid0175    | 6G    | DGDG, ambiguous  | DGDG 38:4 or DGDG<br>36:6;O2                 |
| lipid0173    | 6H    | DGDG, ambiguous  | DGDG 38:6 or DGDG<br>36:8;O2                 |
| lipid0435    | 6H    | MGDG, oxidized   | MGDG 18:2;O_16:3*                            |
| lipid0623    | 6I    | MGDG, oxidized   | MGDG 18:3;O_16:3*                            |
| lipid0370    | 6I    | MGDG, oxidized   | MGDG 18:3;O2_16:3*                           |
| lipid0383    | 6J    | MGDG, oxidized   | MGDG 18:3;O2_18:3;O**                        |
| lipid0318    | 6J    | MGDG, oxidized   | MGDG 18:3;O3_16:3**                          |
| lipid0637    | 6K    | MGDG, oxidized   | MGDG 18:3_16:3;O*                            |
| lipid0327    | 6K    | MGDG, oxidized   | MGDG 18:3_16:3;O2*                           |

|           |    |                 |                                                               |
|-----------|----|-----------------|---------------------------------------------------------------|
| lipid0323 | 6L | MGDG, oxidized  | MGDG 18:3_16:4;O                                              |
| lipid0837 | 6L | MGDG, oxidized  | MGDG 18:3_7:1;O*                                              |
| lipid0358 | 6M | MGDG, oxidized  | MGDG 18:4;O_16:3                                              |
| lipid0362 | 6M | MGDG, oxidized  | MGDG 18:4;O_16:3;O*                                           |
| lipid0325 | 6N | MGDG, oxidized  | MGDG 18:4;O_16:4;O<br>(16:4;O as fragment;<br>Arabidopside A) |
| lipid0361 | 6N | MGDG, oxidized  | MGDG 18:4;O_16:4;O<br>(18:4;O as fragment;<br>Arabidopside A) |
| lipid0372 | 6O | MGDG, oxidized  | MGDG 18:4;O_18:3                                              |
| lipid0385 | 6O | MGDG, oxidized  | MGDG 18:4;O_18:3;O3**                                         |
| lipid0386 | 6P | MGDG, oxidized  | MGDG 18:4;O_18:3;O4**                                         |
| lipid0375 | 6P | MGDG, oxidized  | MGDG 18:4;O_18:4;O<br>(Arabidopside B)*                       |
| lipid0384 | 6Q | MGDG, oxidized  | MGDG 18:4;O_18:4;O3 or<br>MGDG 18:4;O_19:3;O2**               |
| lipid0317 | 6Q | MGDG, oxidized  | MGDG 18:4;O3_16:3**                                           |
| lipid0138 | 6R | MGDG, oxidized  | MGDG 30:6;O                                                   |
| lipid0137 | 6R | MGDG, oxidized  | MGDG 30:6;O2                                                  |
| lipid0831 | 6S | MGDG, oxidized  | MGDG 9:1;O_16:3*                                              |
| lipid0834 | 6S | MGDG, oxidized  | MGDG 9:1;O2_16:3*                                             |
| lipid0154 | 6T | MGDG, ambiguous | MGDG 38:4 or MGDG<br>36:6;O2                                  |
| lipid0152 | 6T | MGDG, ambiguous | MGDG 38:6 or MGDG<br>36:8;O2                                  |
| lipid0357 | 6U | PG, oxidized    | PG 18:4;O_16:0                                                |
| lipid0356 | 6U | PG, oxidized    | PG 18:4;O_16:1                                                |
| lipid0364 | 6V | PG, oxidized    | PG 18:4;O_18:2*                                               |
| lipid0363 | 6V | PG, oxidized    | PG 18:4;O_18:3*                                               |
| lipid0022 | 6W | PG, oxidized    | PG 34:3;O                                                     |
| lipid0021 | 6W | PG, oxidized    | PG 34:4;O                                                     |
| lipid0628 | 6X | PC, oxidized    | PC 18:2_18:3;O*                                               |
| lipid0379 | 6X | PC, oxidized    | PC 18:2_18:3;O2*                                              |
| lipid0421 | 6Y | PC, oxidized    | PC 18:3;O3_18:2*                                              |
| lipid0378 | 6Y | PC, oxidized    | PC 18:3_18:3;O2*                                              |
| lipid0604 | 6Z | PE, oxidized    | PE 16:0_18:4;O2*                                              |
| lipid0429 | 6Z | PE, oxidized    | PE 18:2;O_18:3                                                |

DGDG 16:0\_18:3;O\* (lipid0632)

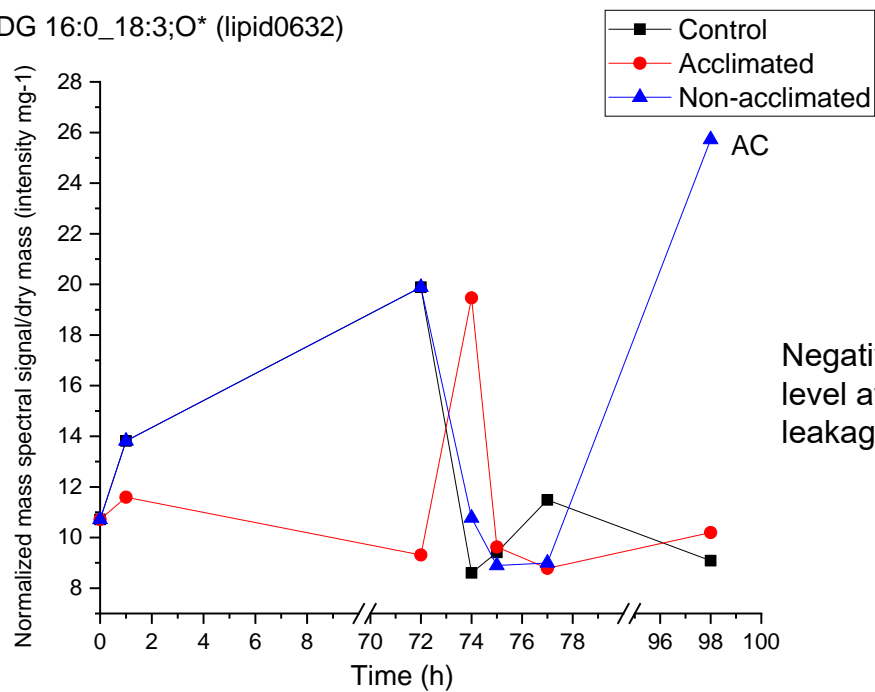

DGDG 16:0\_18:4;O\* (lipid0392)

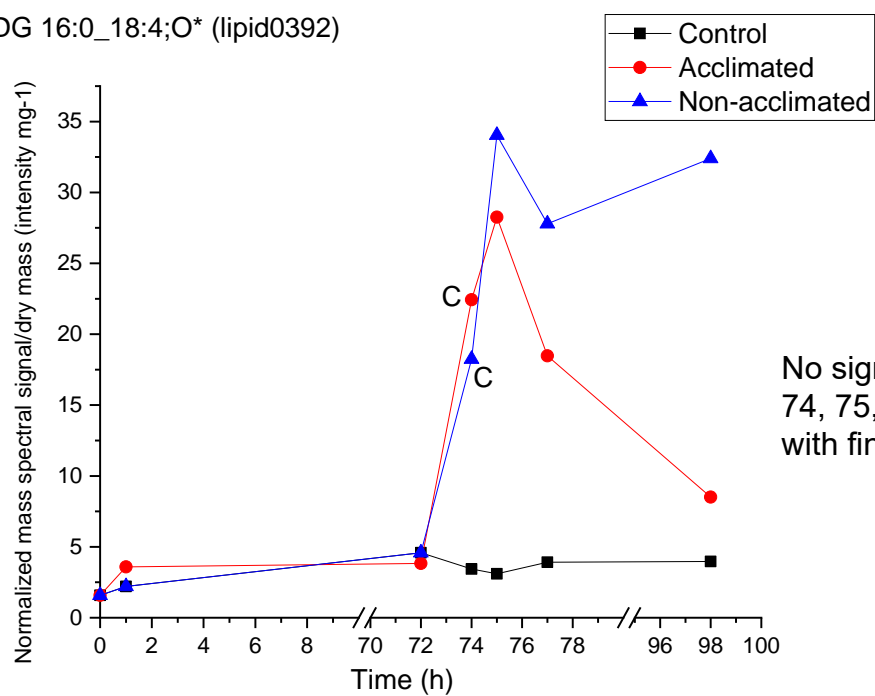

DGDG 18:3;O\_16:4;O\*\* (lipid0339)

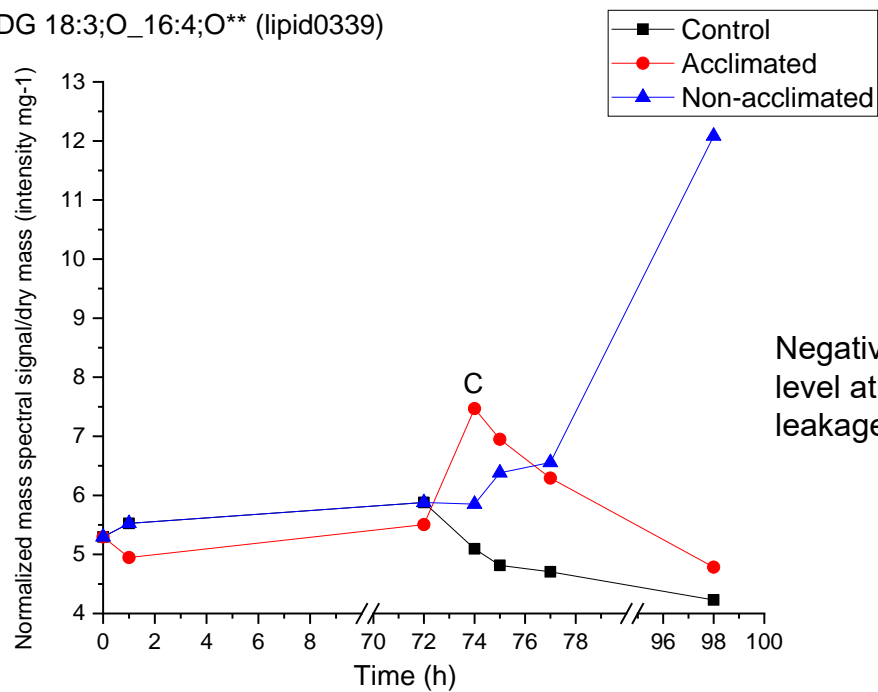

DGDG 18:3;O2\_16:3\* (lipid0394)

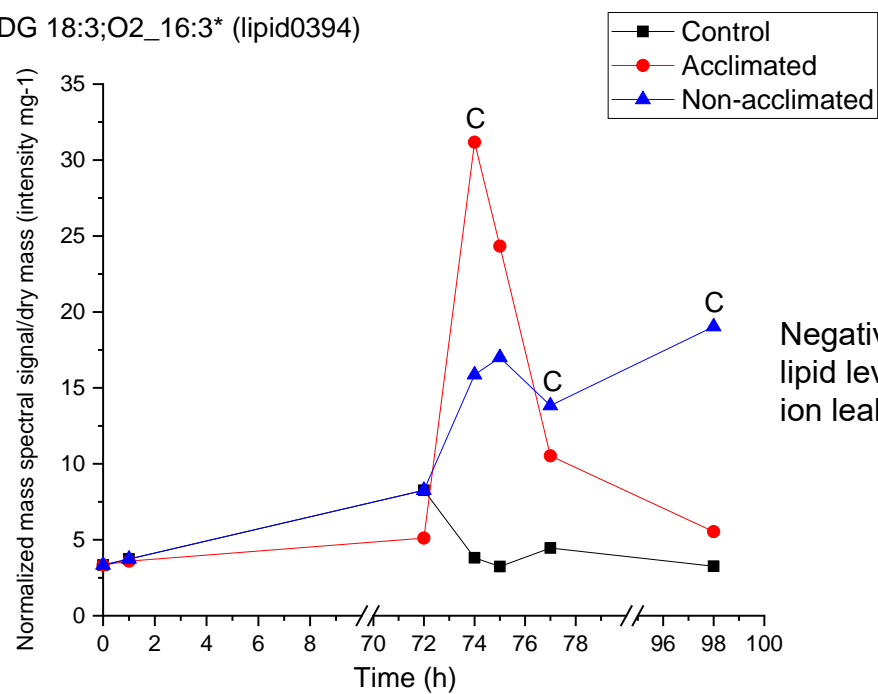



DGDG 18:3;O<sub>2</sub>\_18:3 or DGDG 18:4;O<sub>2</sub>\_18:2;O<sup>\*\*</sup> (lipid0400)

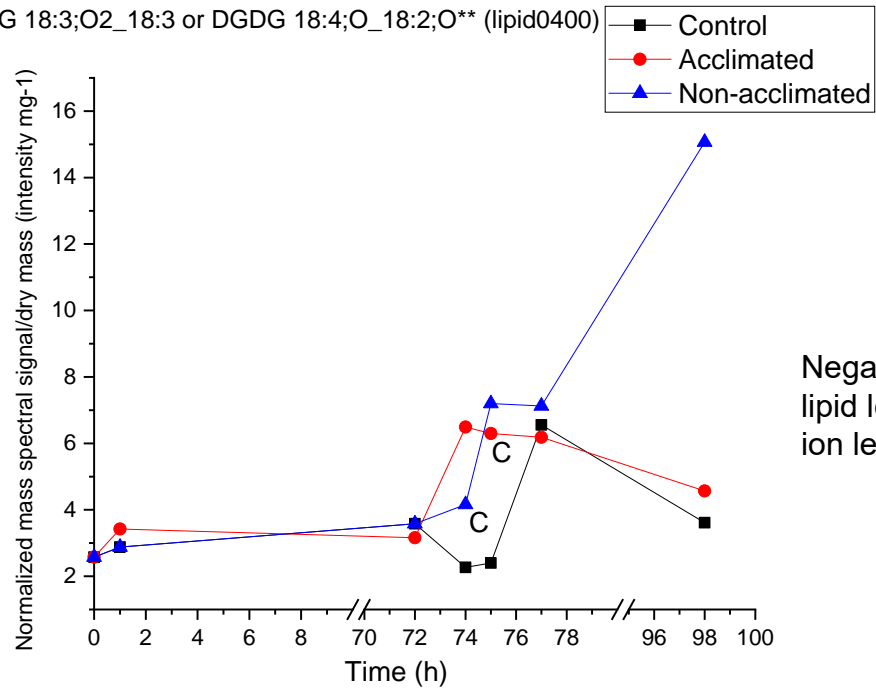

DGDG 18:3\_16:4;O<sup>\*</sup> (lipid0336)

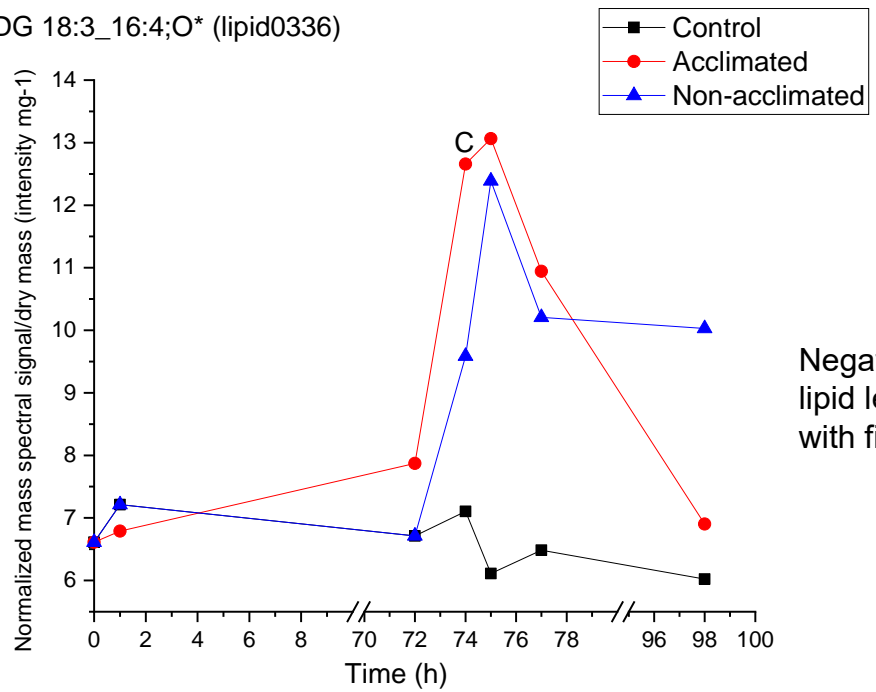

DGDG 18:3\_18:5;O2 (lipid0354)

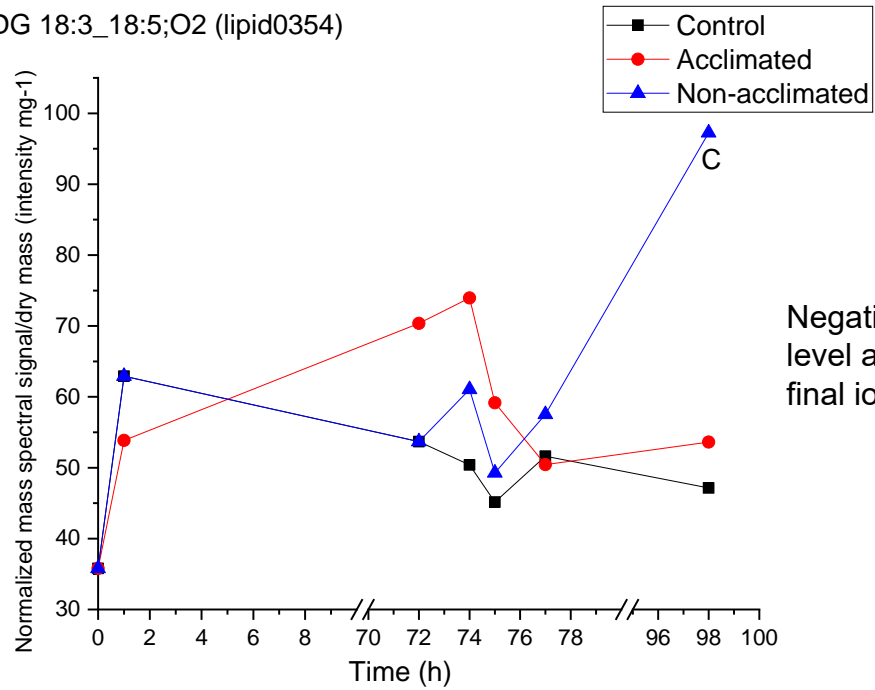

Negative correlation of lipid level at 74 and 75 h with final ion leakage

DGDG 18:4;O\_16:3\* (lipid0387)

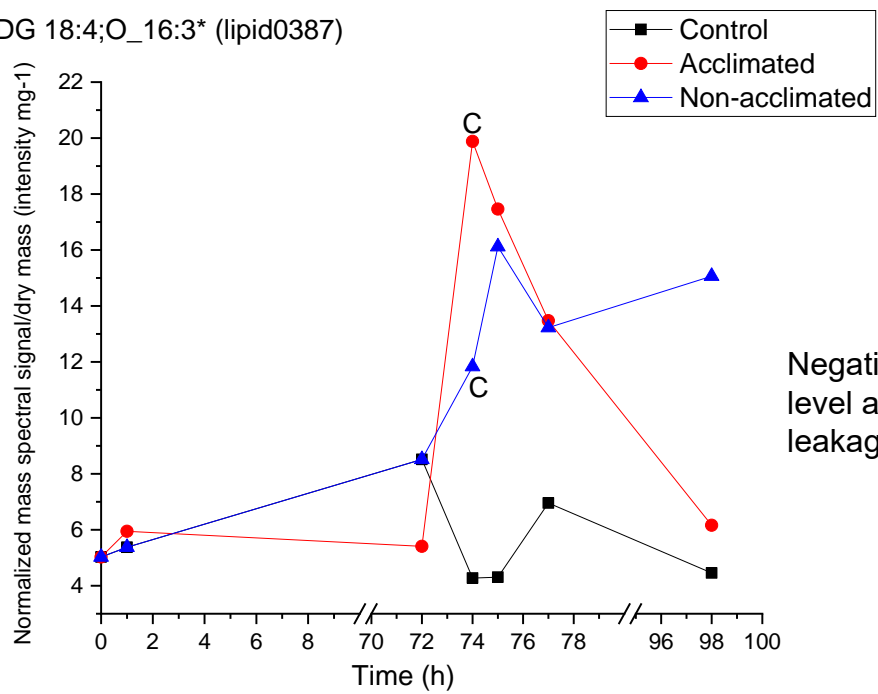

Negative correlation of lipid level at 74 h with final ion leakage

DGDG 18:4;O<sub>16:3</sub>;O\* (lipid0390)

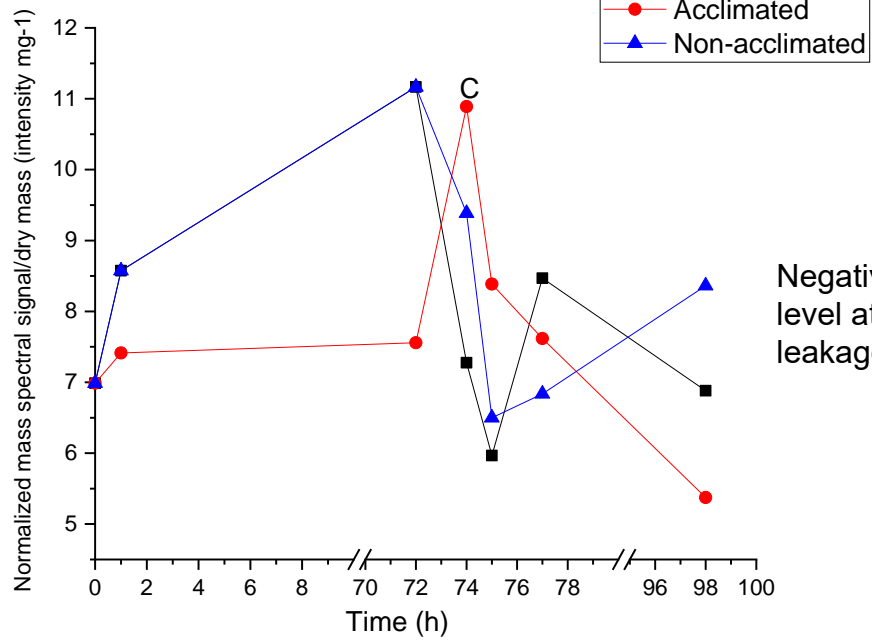

DGDG 18:4;O<sub>18:3</sub> (lipid0396)

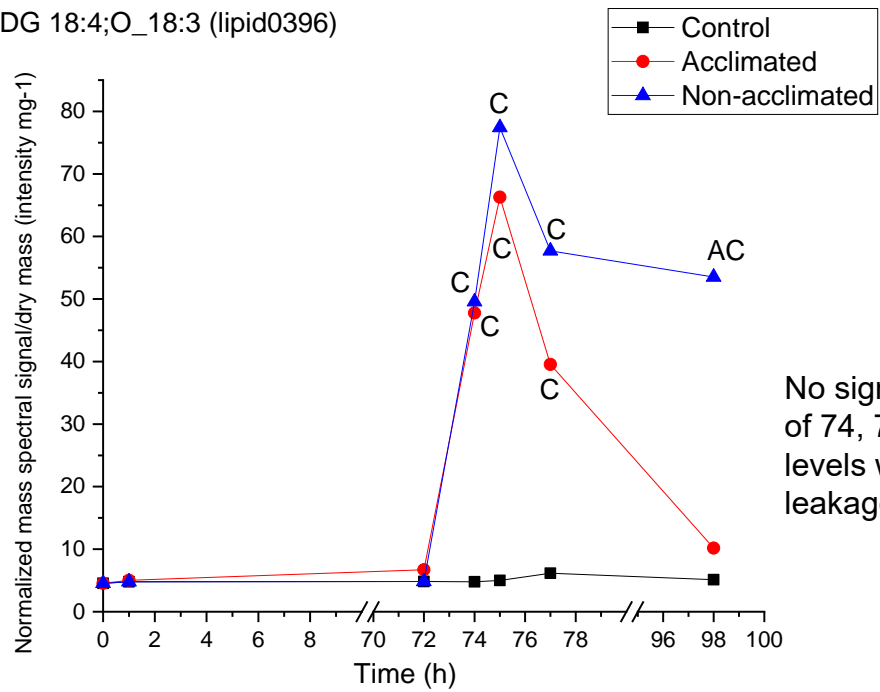

DGDG 18:4;O\_18:3;O\*\* (lipid0399)

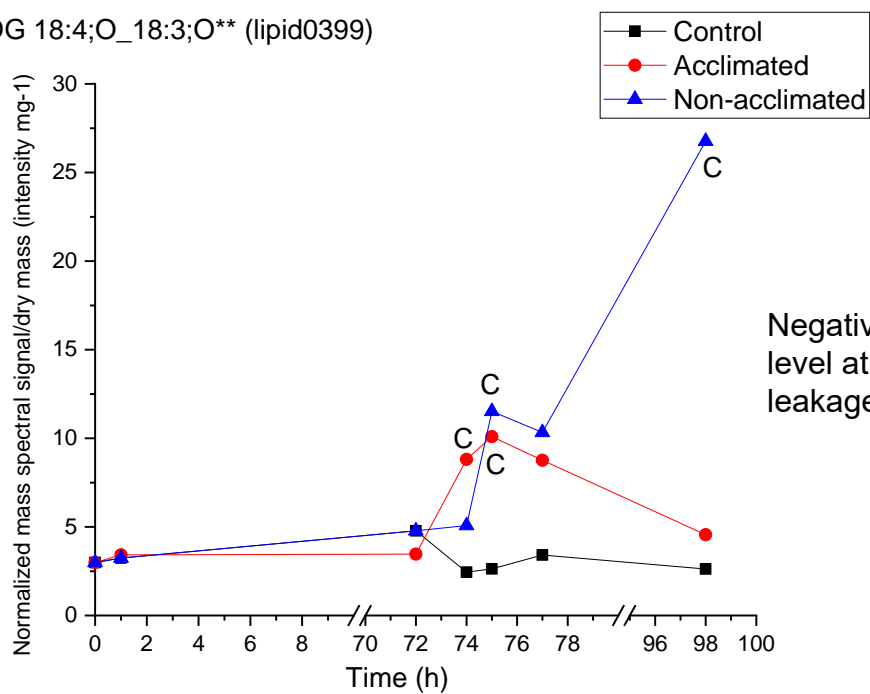

DGDG 18:4;O\_18:4;O (Arabidopsis D)\* (lipid0398)

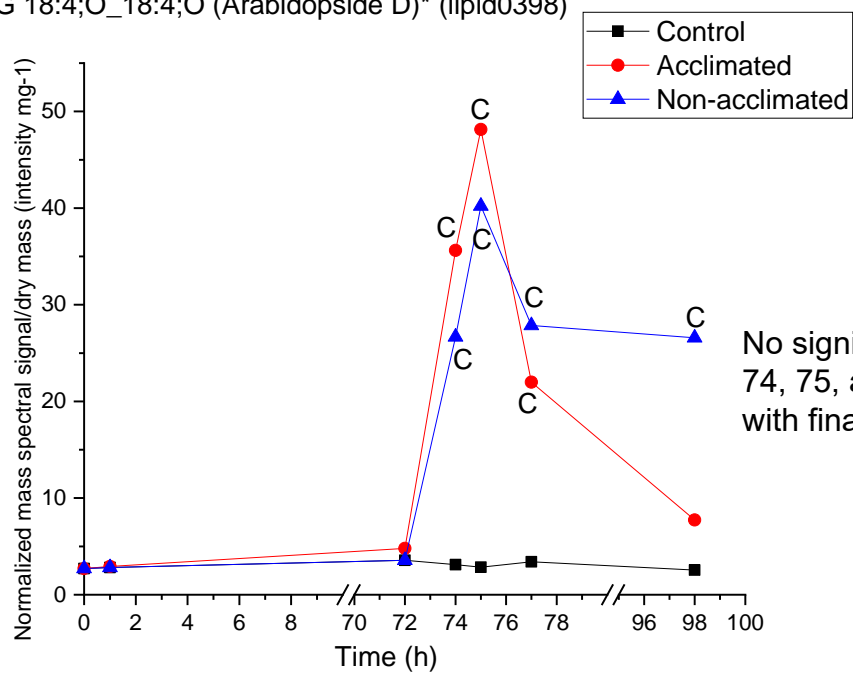

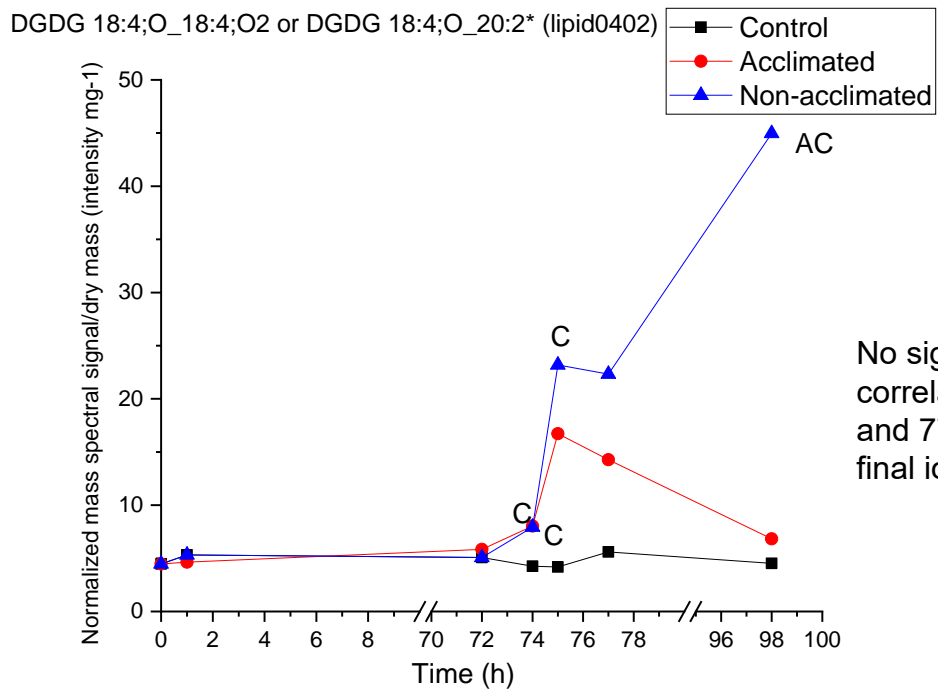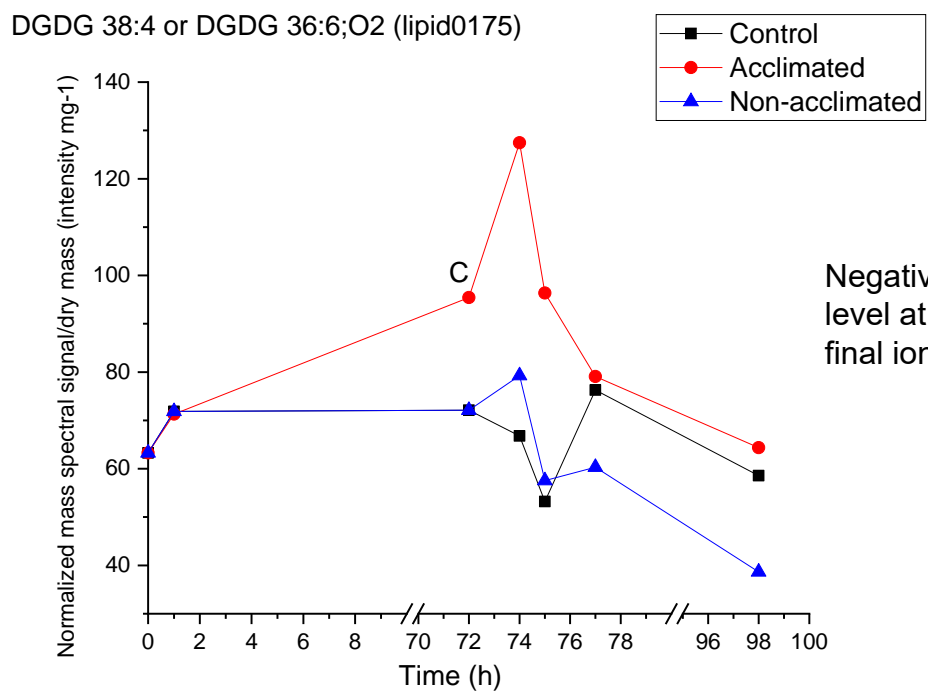

DGDG 38:6 or DGDG 36:8;O2 (lipid0173)

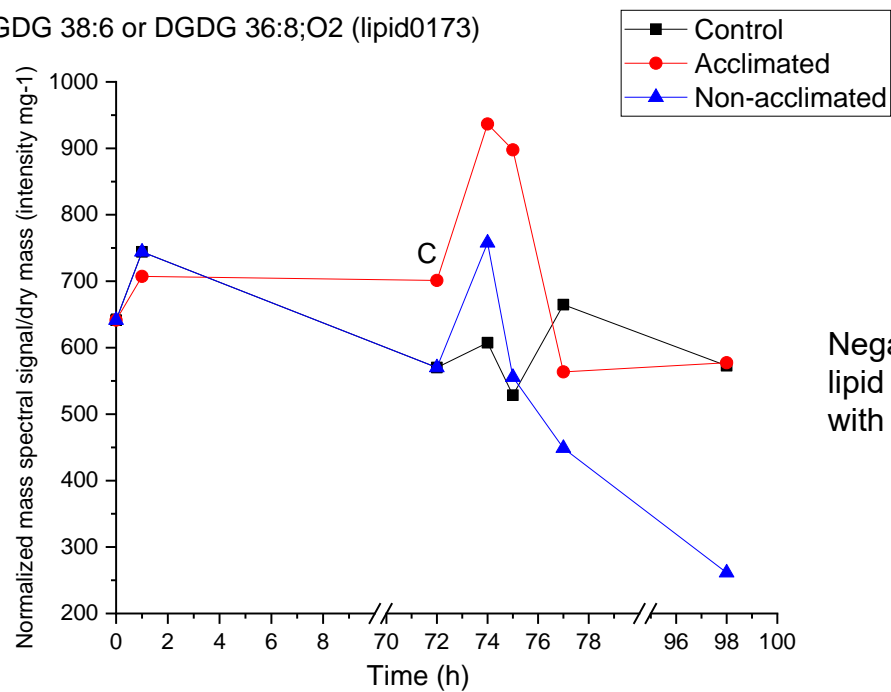

MGDG 18:2;O\_16:3\* (lipid0435)

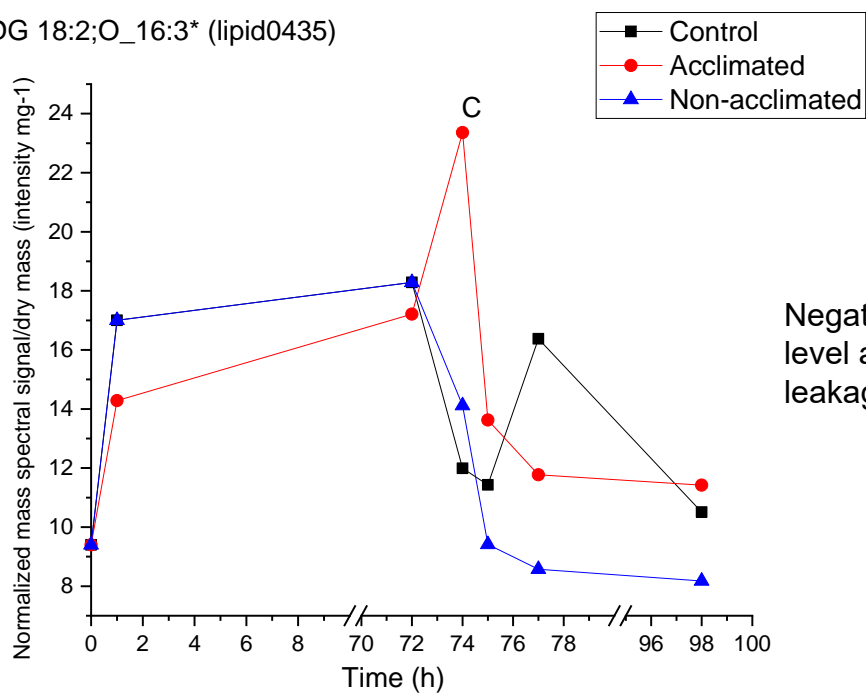

MGDG 18:3;O\_16:3\* (lipid0623)

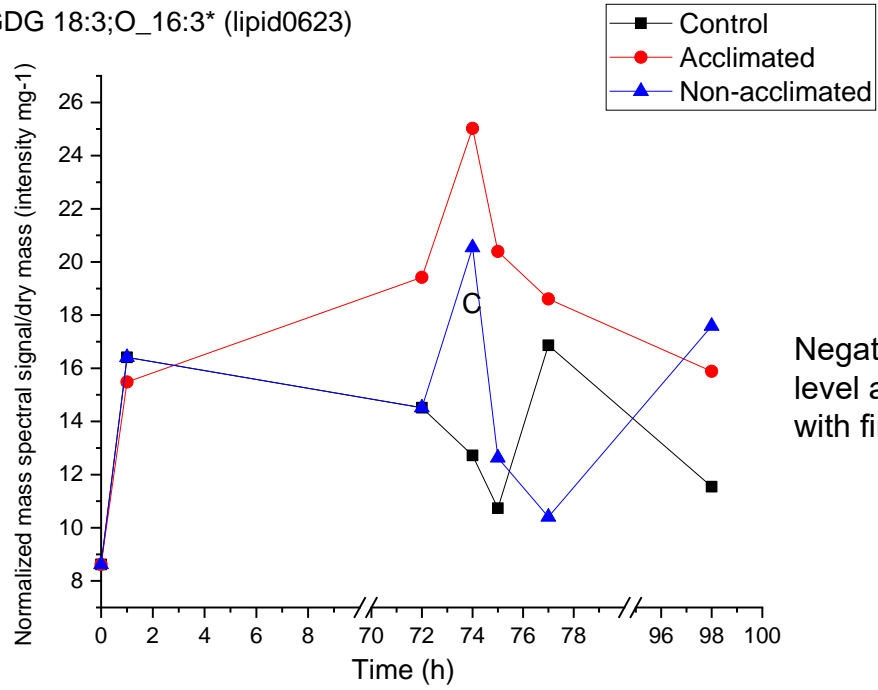

Negative correlation of lipid level at 74, 75, and 77 h with final ion leakage

MGDG 18:3;O2\_16:3\* (lipid0370)

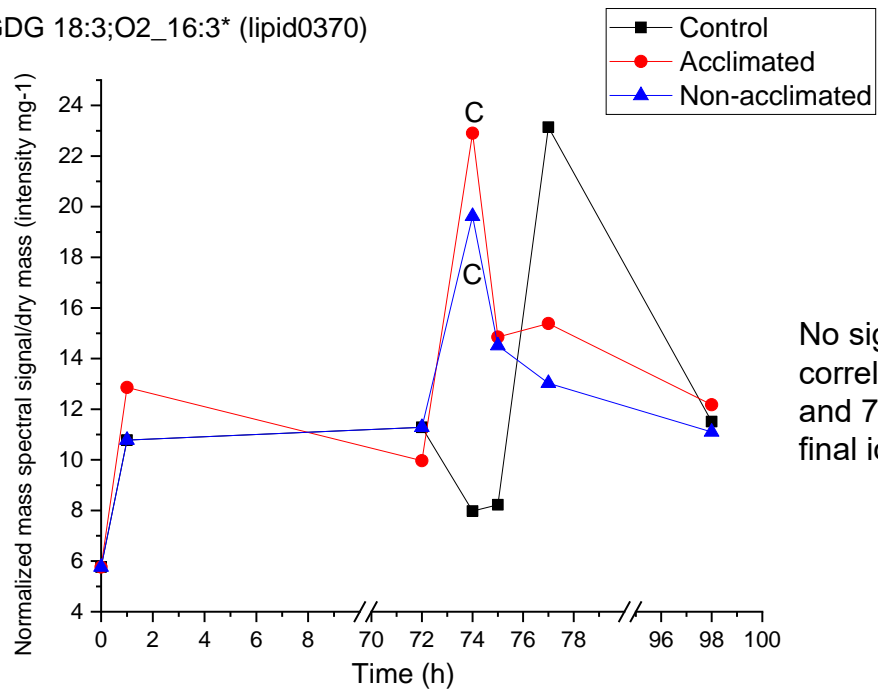

No significant correlation of 74-, 75-, and 77-h lipid levels with final ion leakage

MGDG 18:3;O2\_18:3;O\*\* (lipid0383)

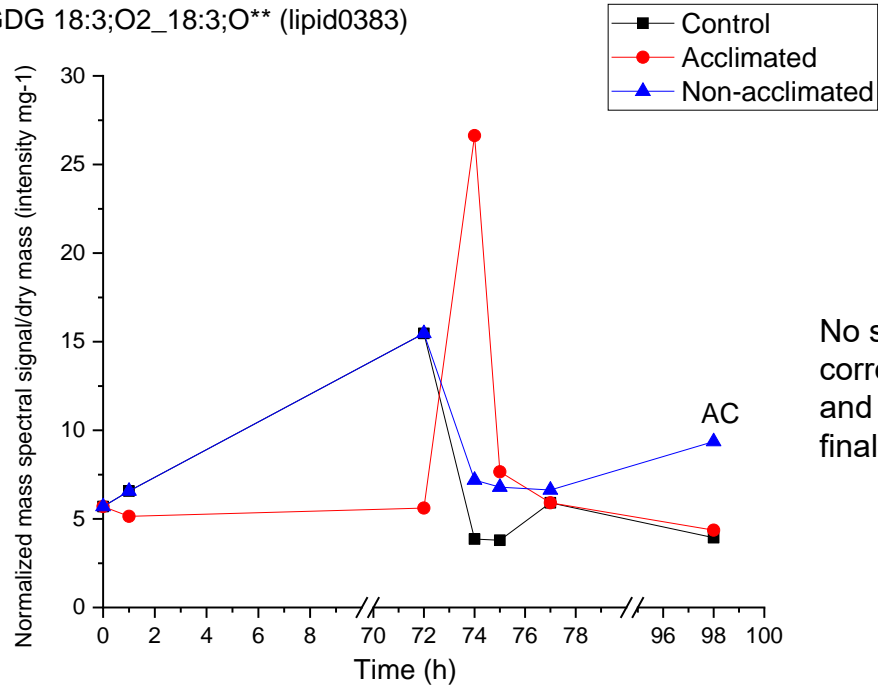

No significant correlation of 74-, 75-, and 77-h lipid levels with final ion leakage

MGDG 18:3;O3\_16:3\*\* (lipid0318)

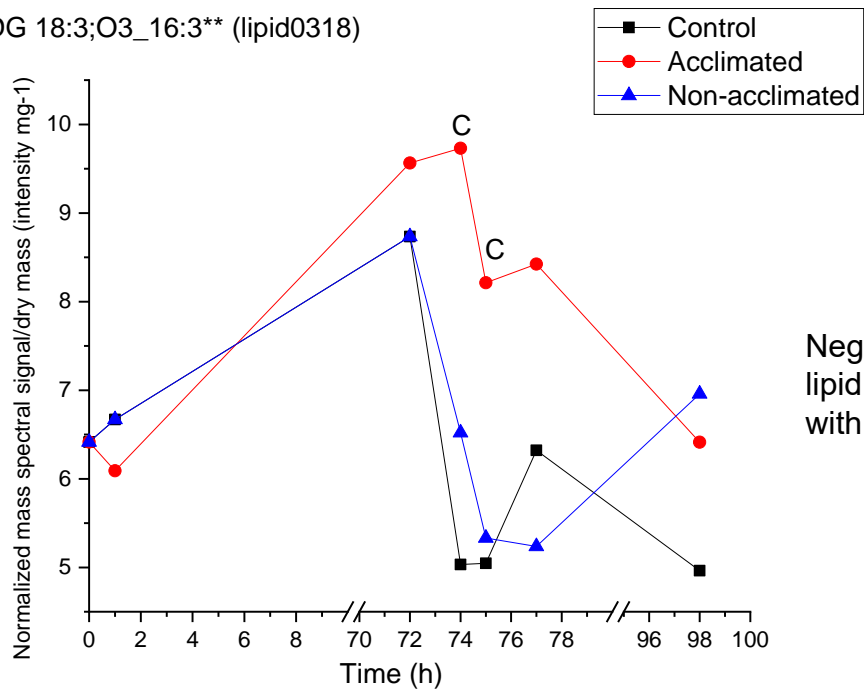

Negative correlation of lipid level at 74 and 75 h with final ion leakage



MGDG 18:3\_16:3;O\* (lipid0637)

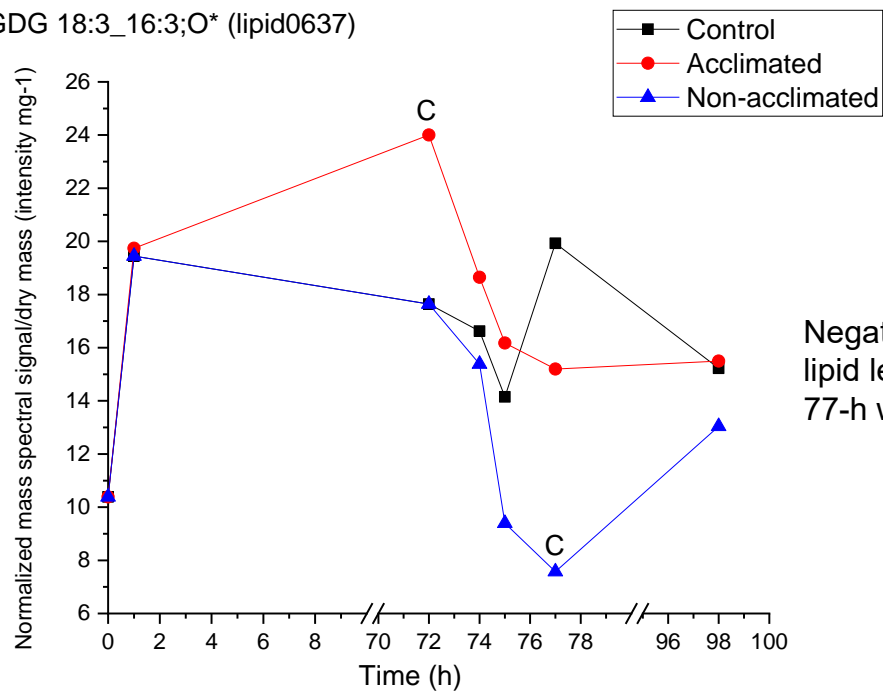

Negative correlation of lipid level at 74-, 75-, and 77-h with final ion leakage

MGDG 18:3\_16:3;O2\* (lipid0327)

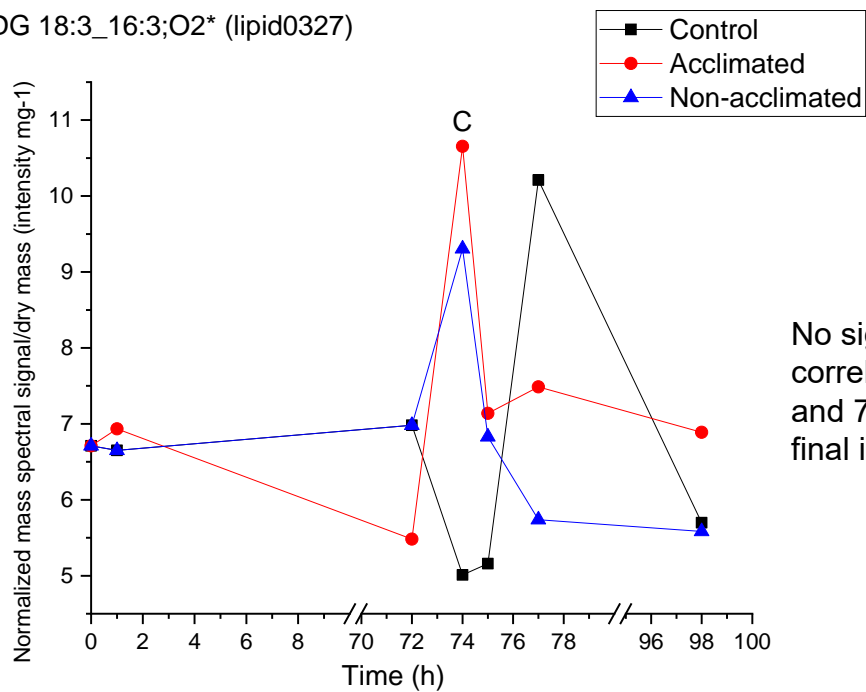

No significant correlation of 74-, 75-, and 77-h lipid levels with final ion leakage

MGDG 18:3\_16:4;O (lipid0323)

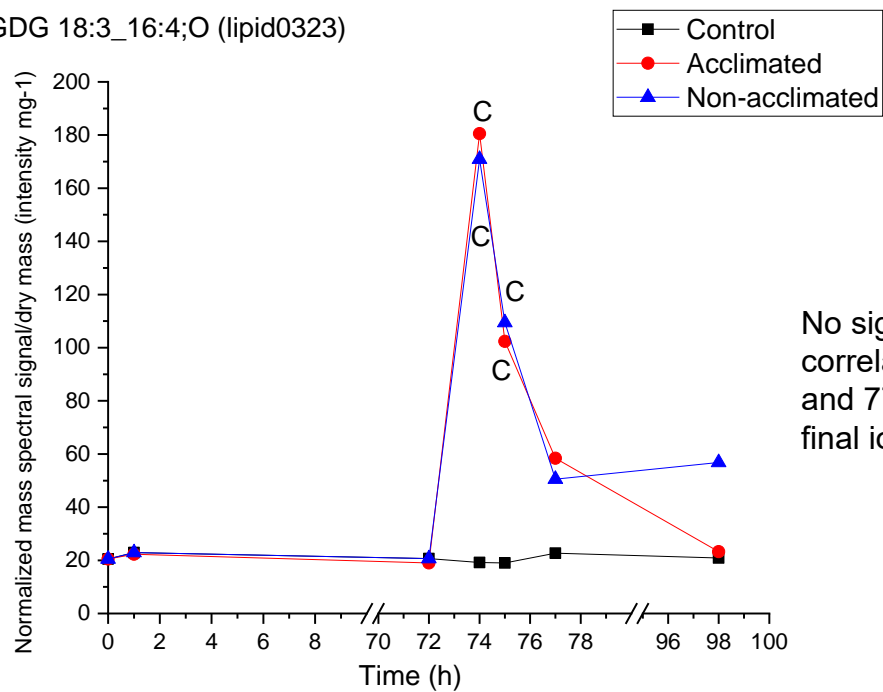

No significant correlation of 74-, 75-, and 77-h lipid levels with final ion leakage

MGDG 18:3\_7:1;O\* (lipid0837)

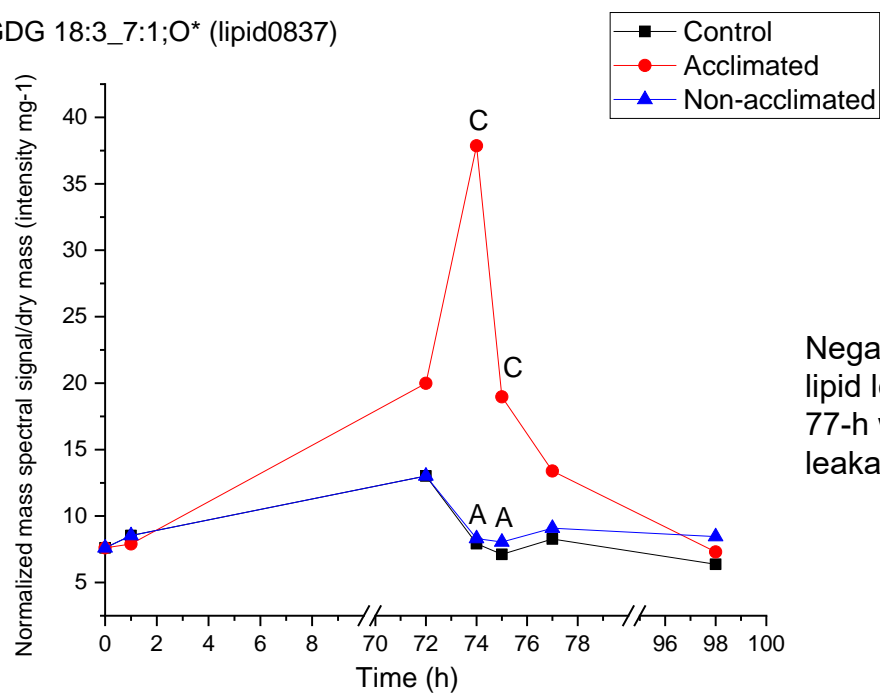

Negative correlation of lipid level at 74-, 75-, and 77-h with final ion leakage

MGDG 18:4;O\_16:3 (lipid0358)

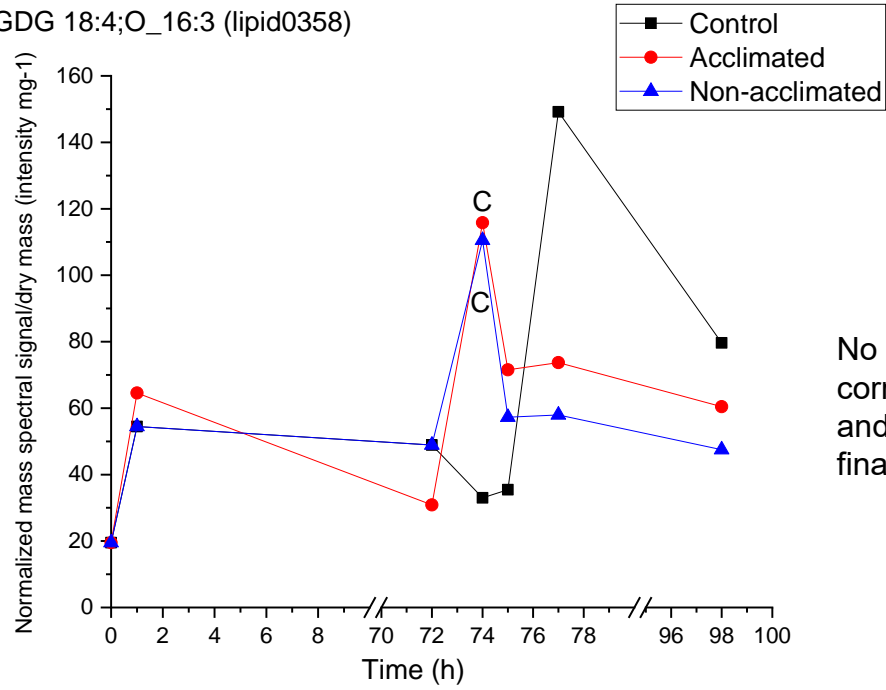

No significant correlation of 74-, 75-, and 77-h lipid levels with final ion leakage

MGDG 18:4;O\_16:3;O\* (lipid0362)

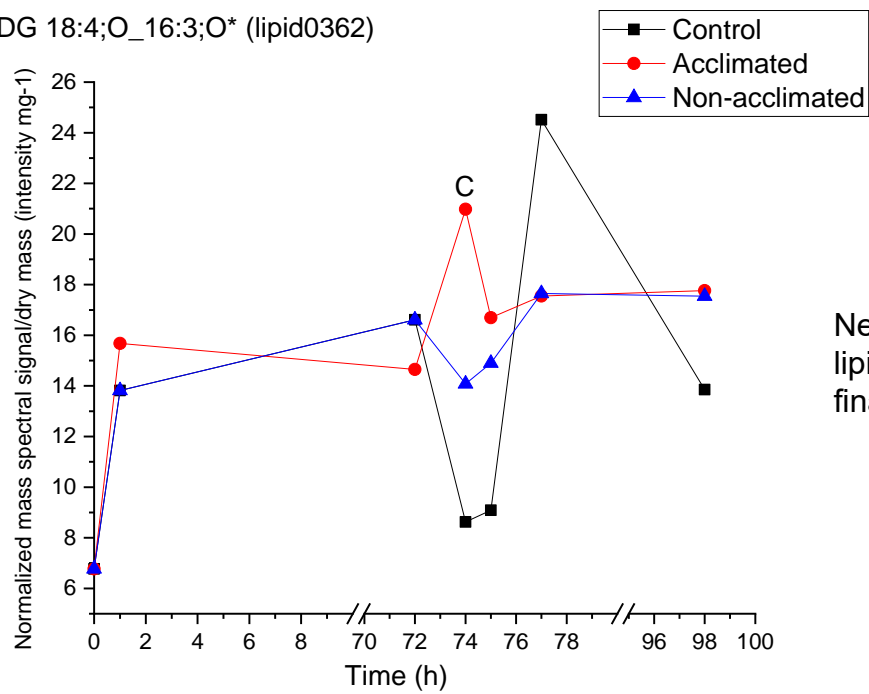

Negative correlation of lipid level at 74 h with final ion leakage

MGDG 18:4;O\_16:4;O (16:4;O as fragment; Arabidopsis A) (lipid0325)

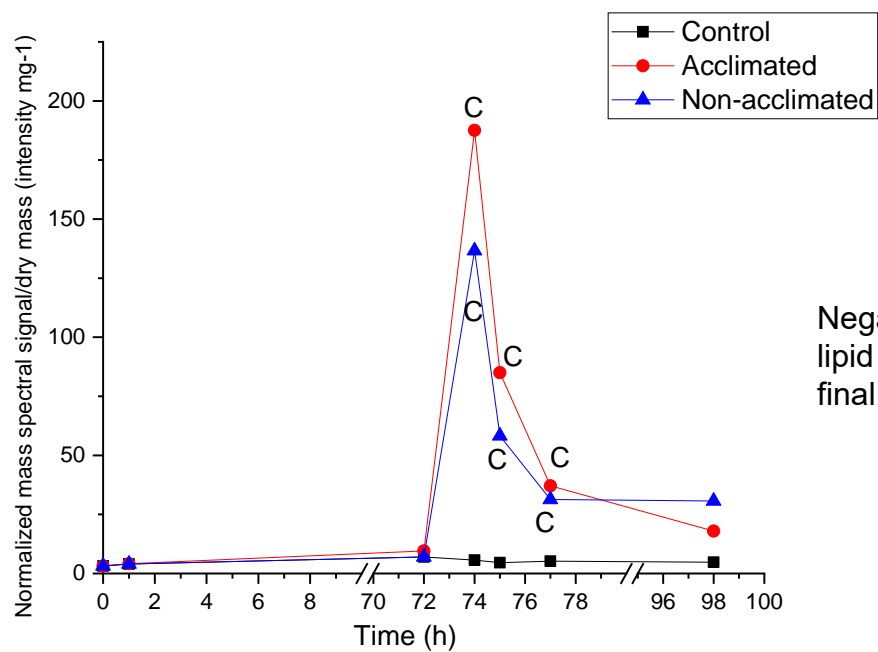

MGDG 18:4;O\_16:4;O (18:4;O as fragment; Arabidopsis A) (lipid0361)

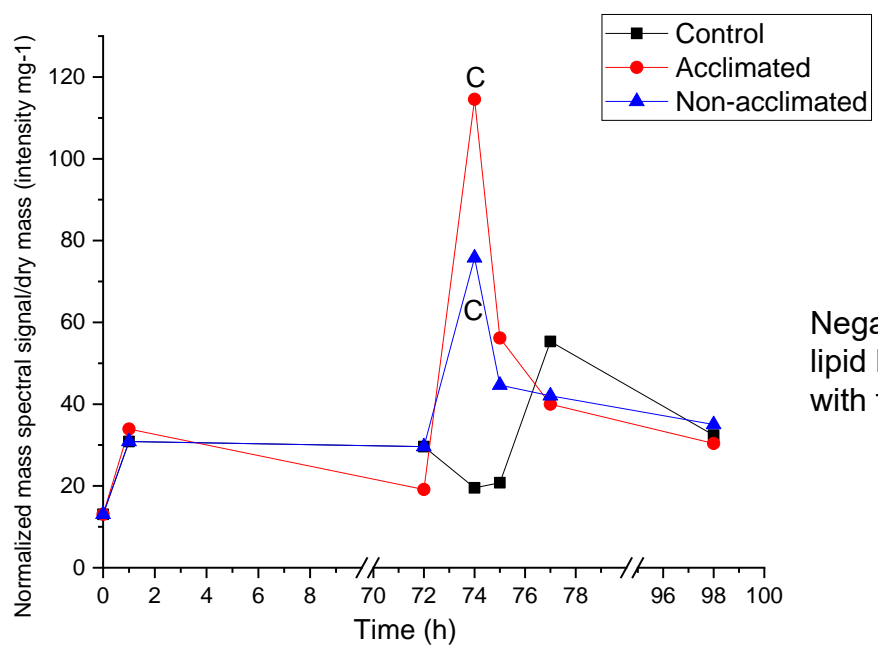

MGDG 18:4;O\_18:3 (lipid0372)

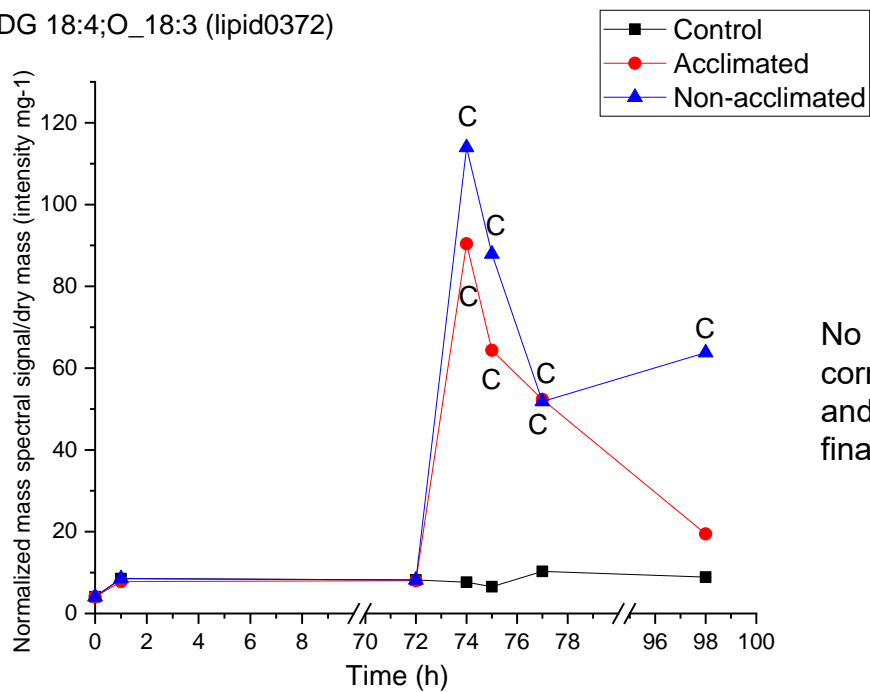

No significant correlation of 74-, 75-, and 77-h lipid levels with final ion leakage

MGDG 18:4;O\_18:3;O3\*\* (lipid0385)

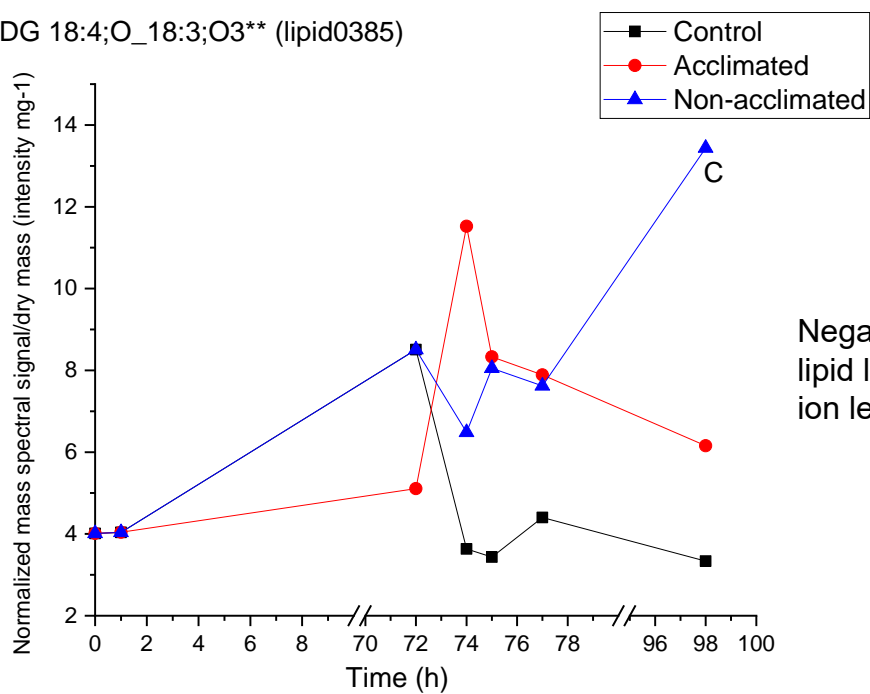

Negative correlation of lipid level at 74 h with final ion leakage

MGDG 18:4;O\_18:3;O4\*\* (lipid0386)

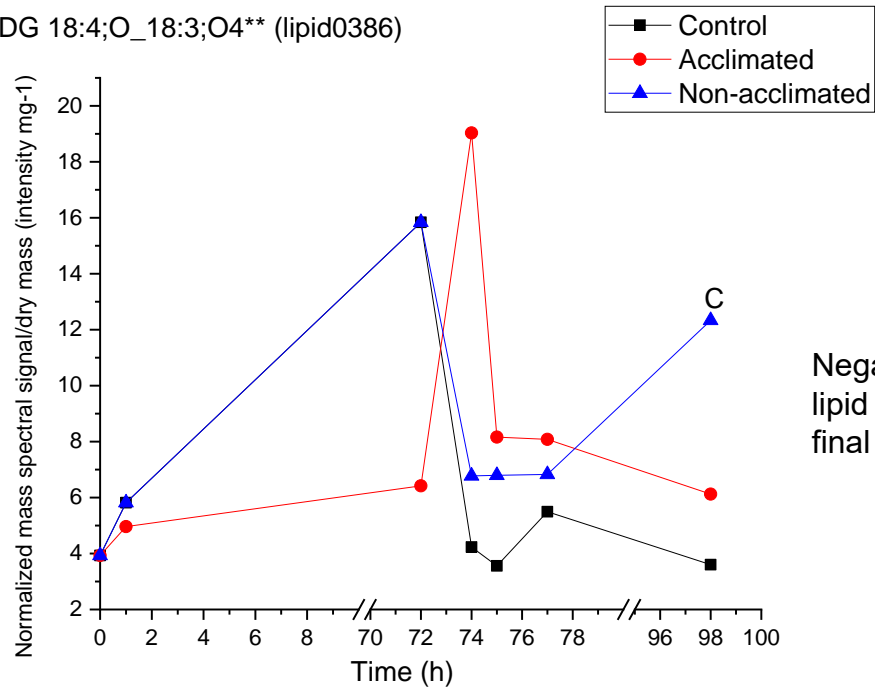

Negative correlation of lipid level at 74 h with final ion leakage

MGDG 18:4;O\_18:4;O (Arabidopsis B)\* (lipid0375)

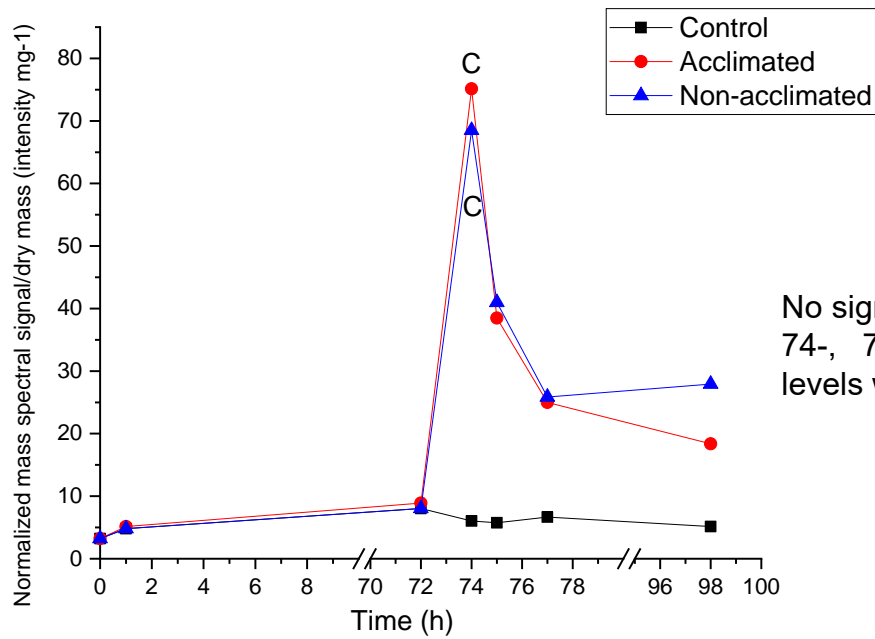

No significant correlation of 74-, 75-, and 77-h lipid levels with final ion leakage

MGDG 18:4;O\_18:4;O3 or MGDG 18:4;O\_19:3;O2\*\* (lipid0384)

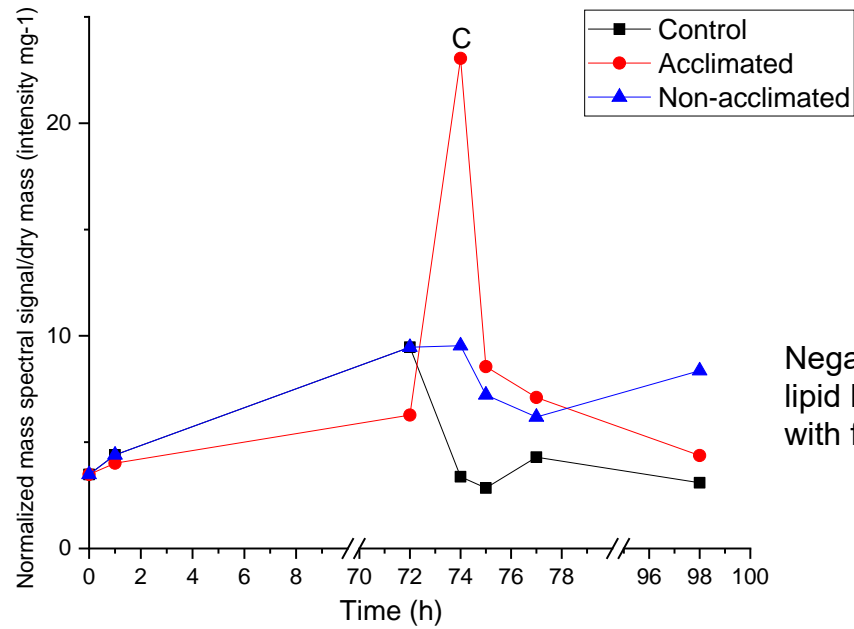

Negative correlation of lipid level at 74 and 75 h with final ion leakage

MGDG 18:4;O3\_16:3\*\* (lipid0317)

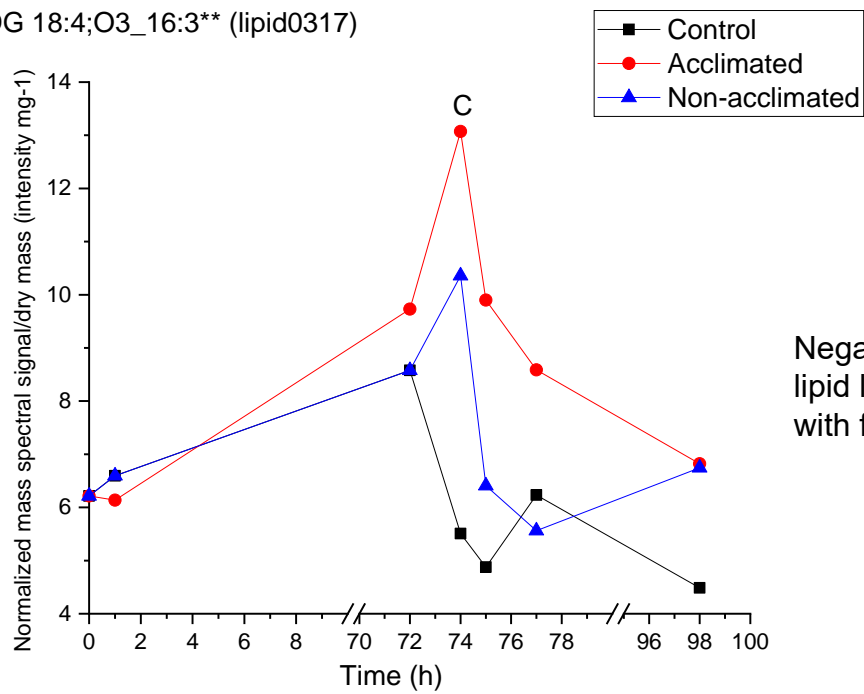

Negative correlation of lipid level at 74 and 75 h with final ion leakage

MGDG 30:6;O (lipid0138)

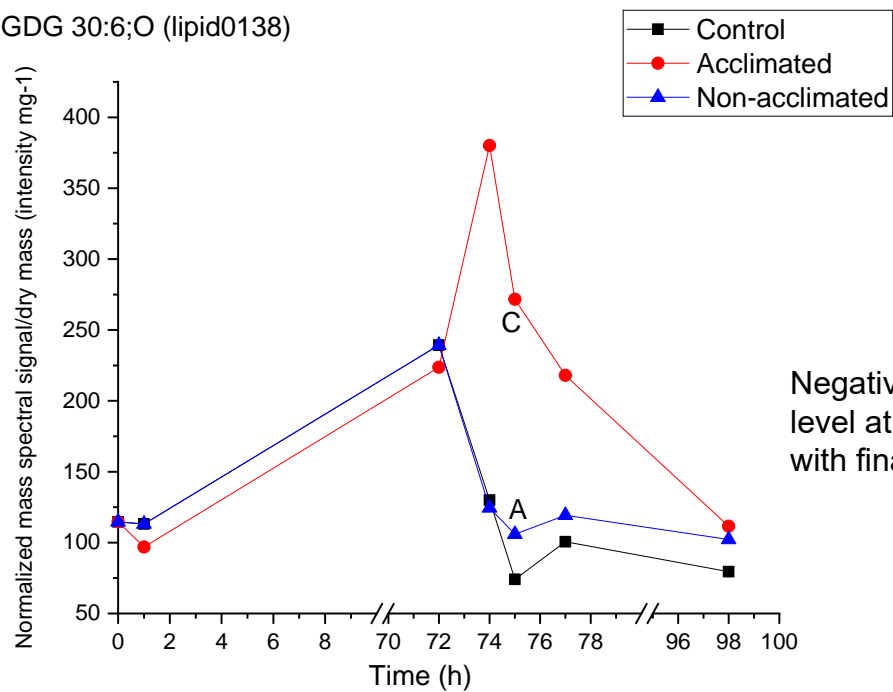

MGDG 30:6;O<sub>2</sub> (lipid0137)

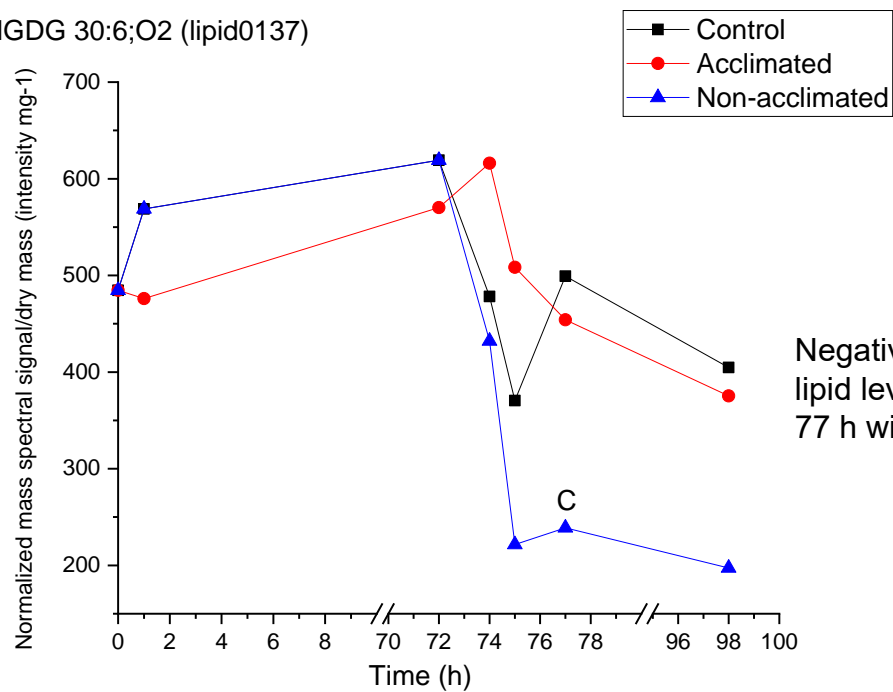



MGDG 9:1;O\_16:3\* (lipid0831)

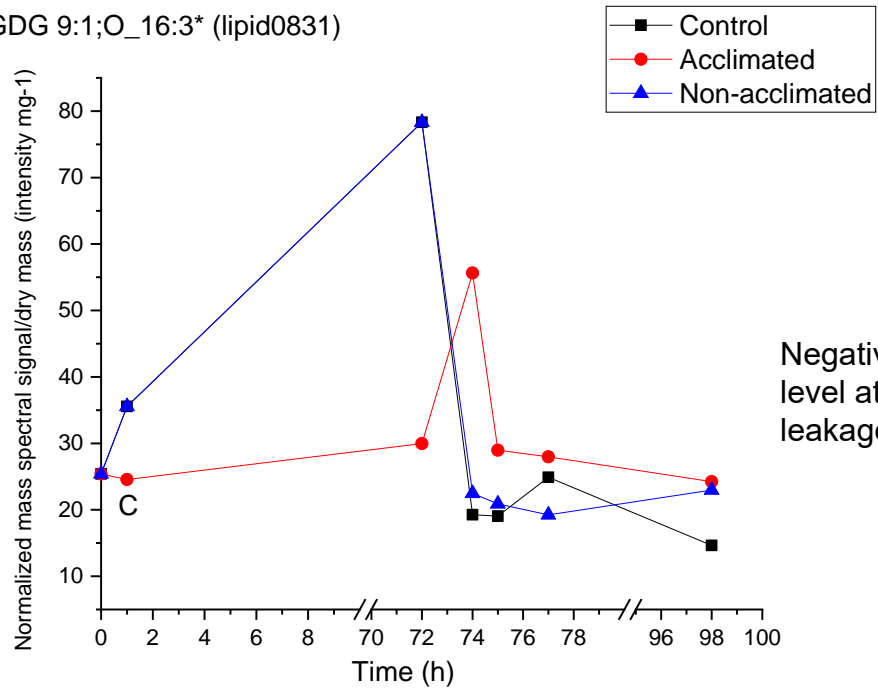

MGDG 9:1;O2\_16:3\* (lipid0834)

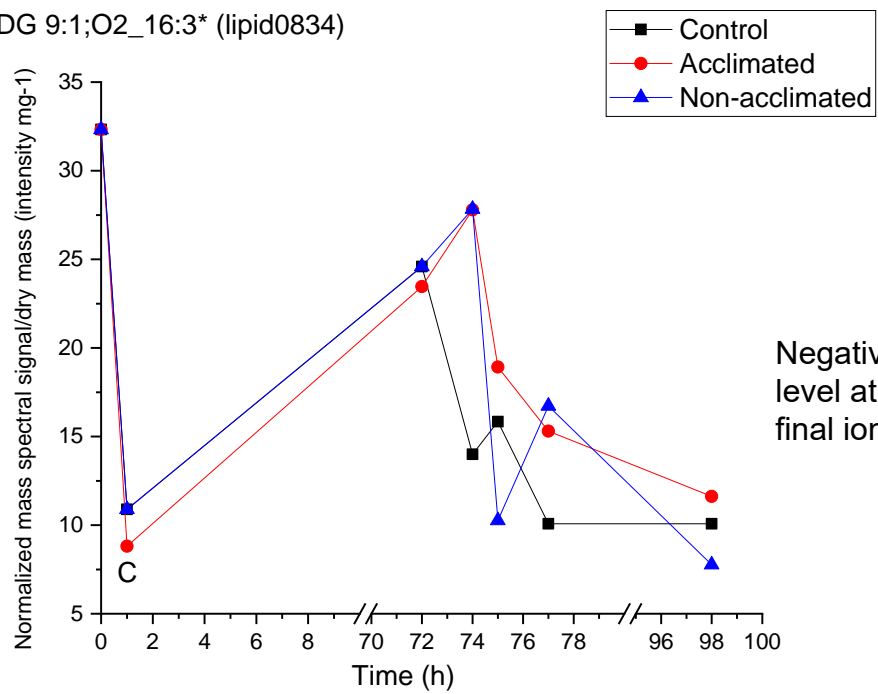

MGDG 38:4 or MGDG 36:6;O2 (lipid0154)

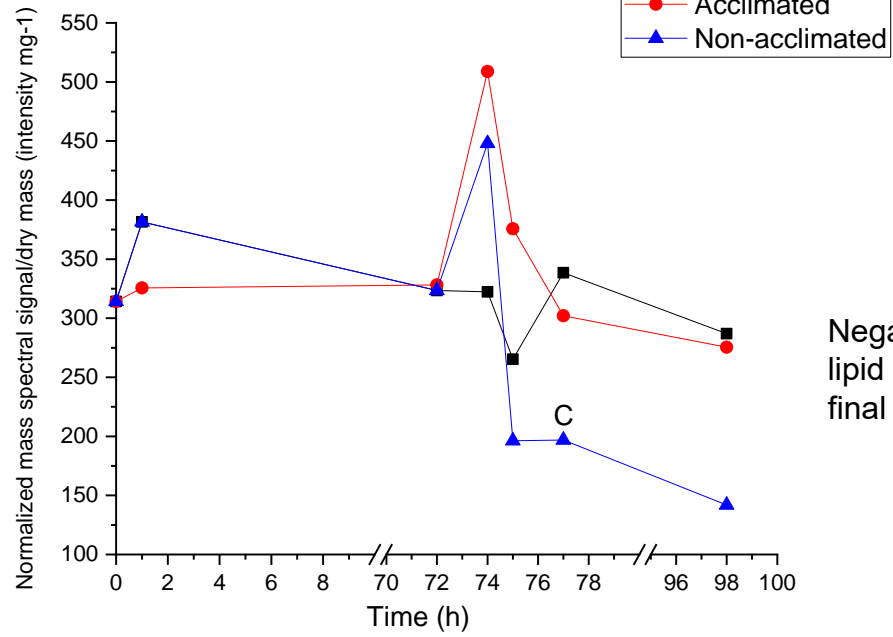

Negative correlation of lipid level at 75 h with final ion leakage

MGDG 38:6 or MGDG 36:8;O2 (lipid0152)

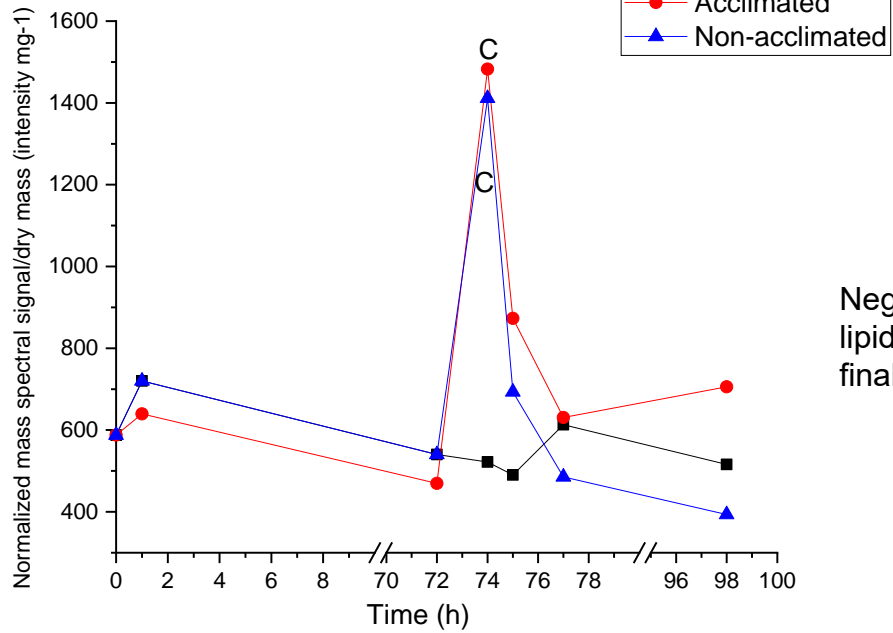

Negative correlation of lipid level at 75 h with final ion leakage

PG 18:4;O<sub>16</sub>:0 (lipid0357)

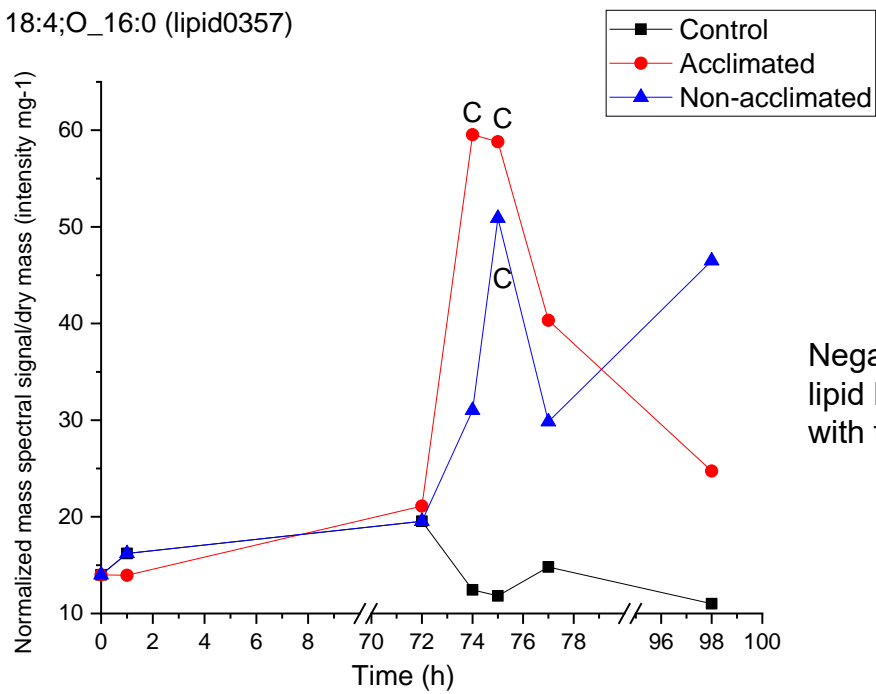

Negative correlation of lipid level at 74 and 75 h with final ion leakage

PG 18:4;O<sub>16</sub>:1 (lipid0356)

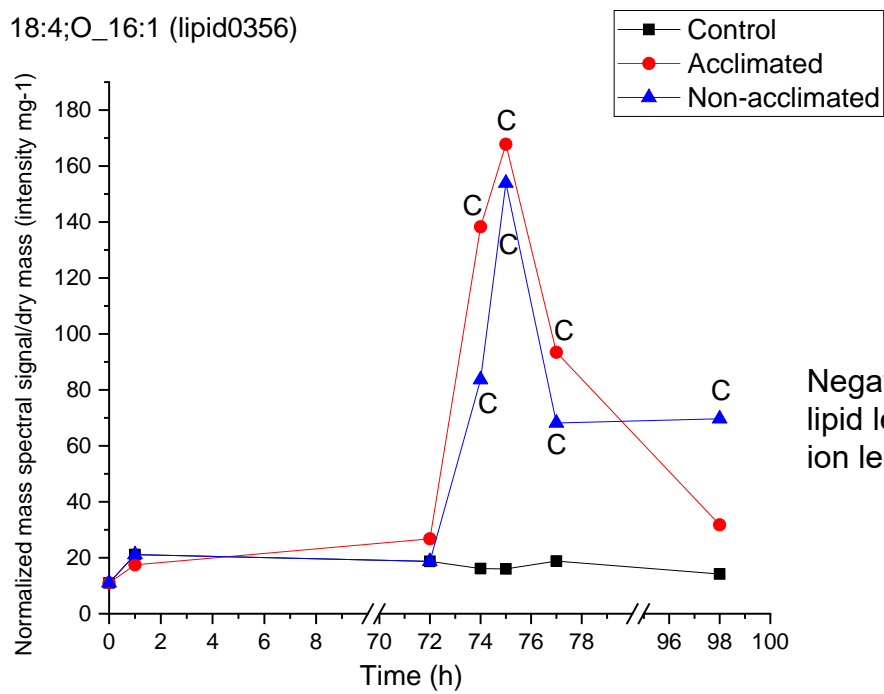

Negative correlation of lipid level at 74 h with final ion leakage

PG 18:4;O\_18:2\* (lipid0364)

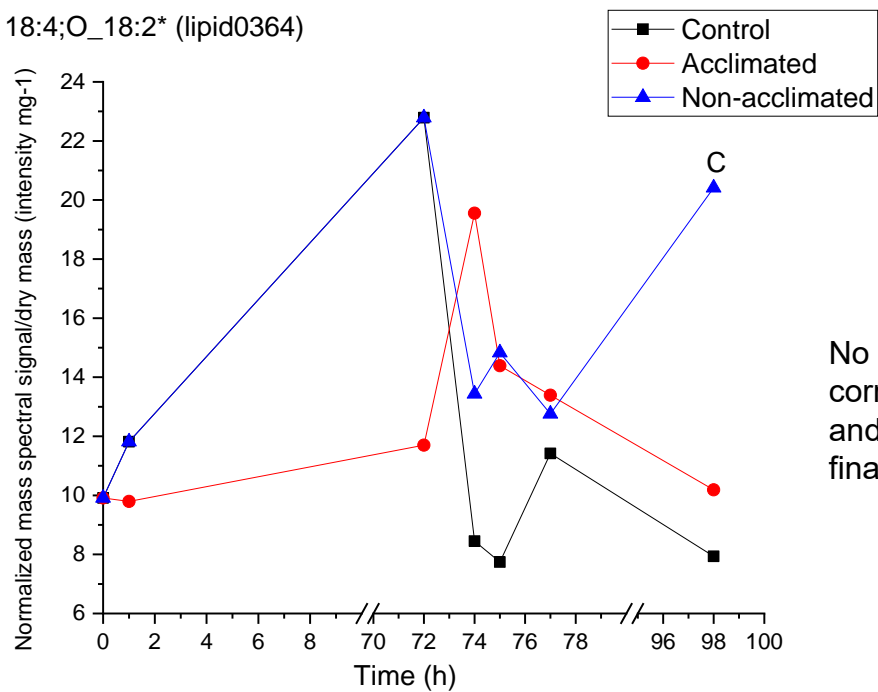

No significant correlation of 74-, 75-, and 77-h lipid levels with final ion leakage

PG 18:4;O\_18:3\* (lipid0363)

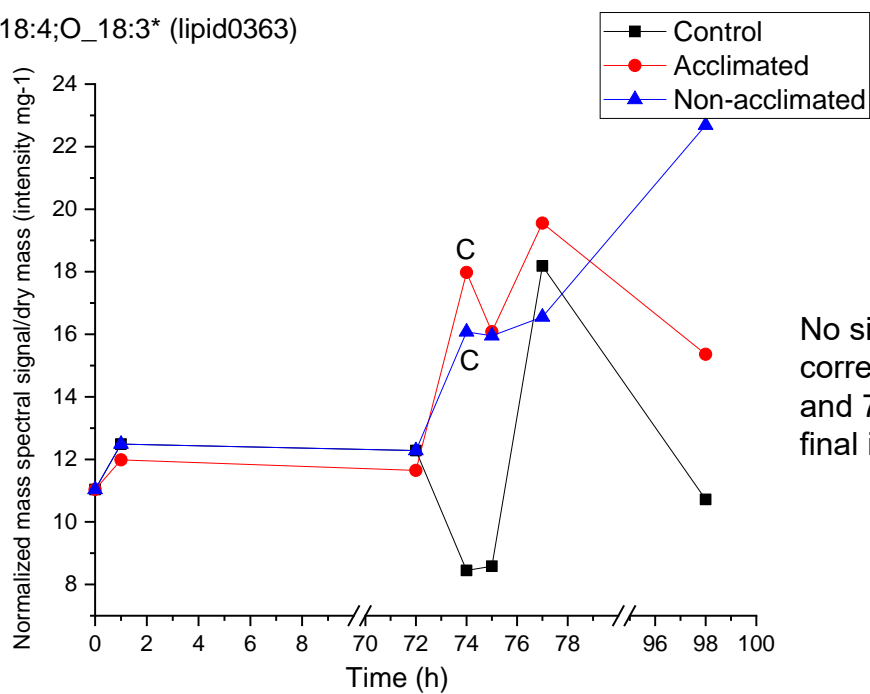

No significant correlation of 74-, 75-, and 77-h lipid levels with final ion leakage

PG 34:3;O (lipid0022)

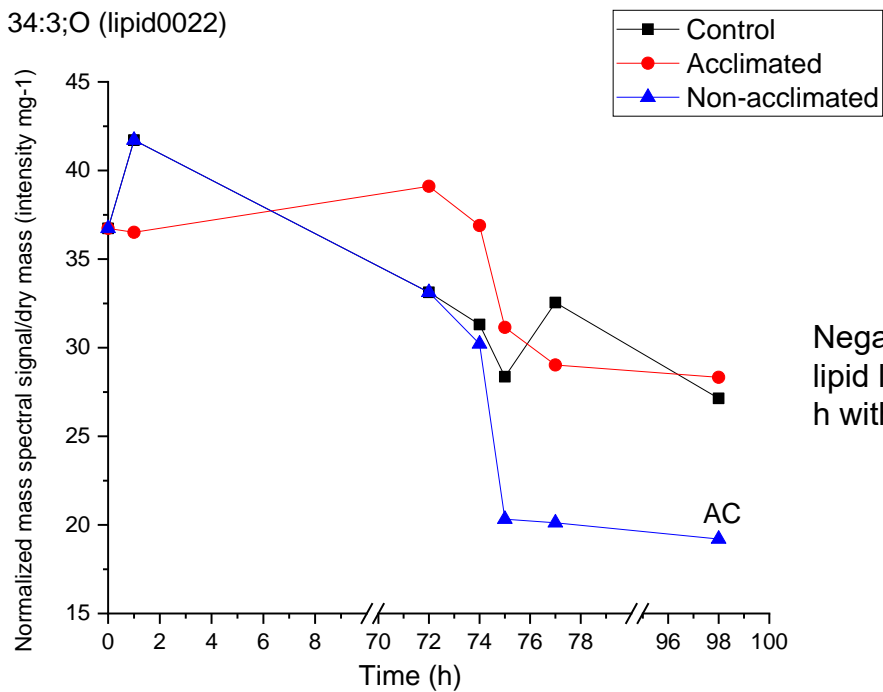

PG 34:4;O (lipid0021)

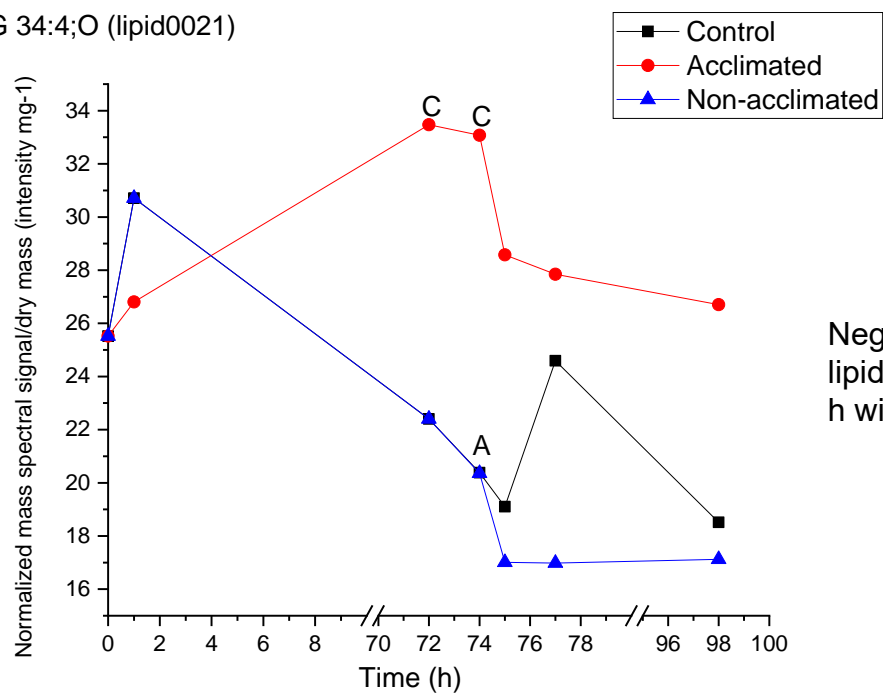

PC 18:2\_18:3;O\* (lipid0628)

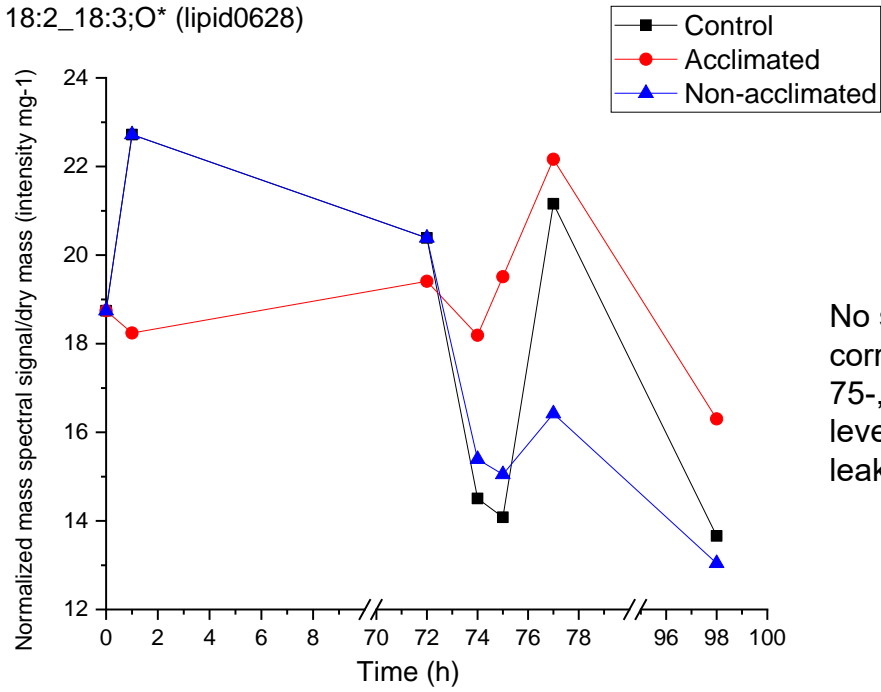

No significant correlation of 74-, 75-, and 77-h lipid levels with final ion leakage

PC 18:2\_18:3;O2\* (lipid0379)

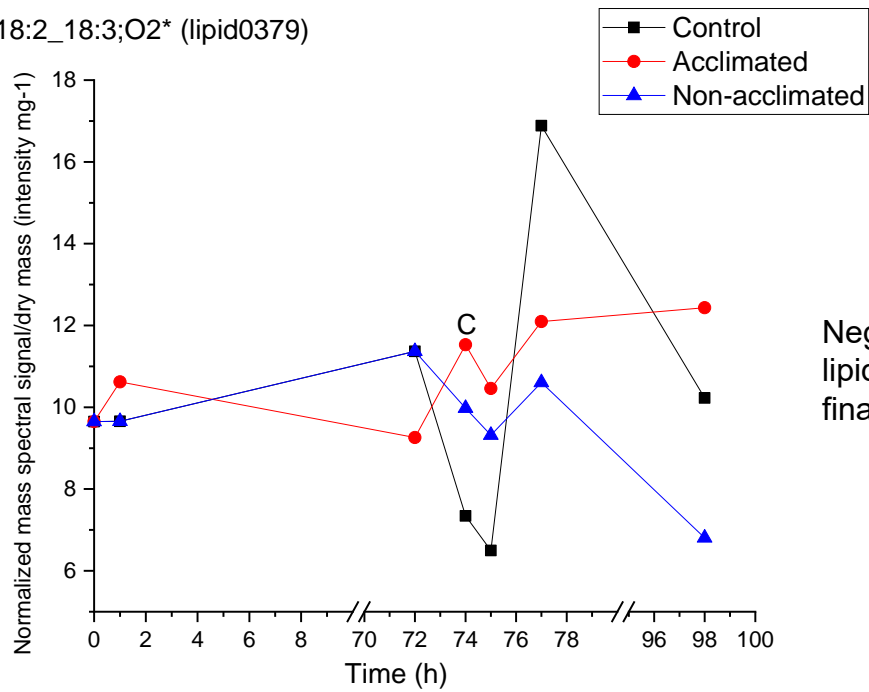

Negative correlation of lipid level at 77 h with final ion leakage

PC 18:3;O3\_18:2\* (lipid0421)

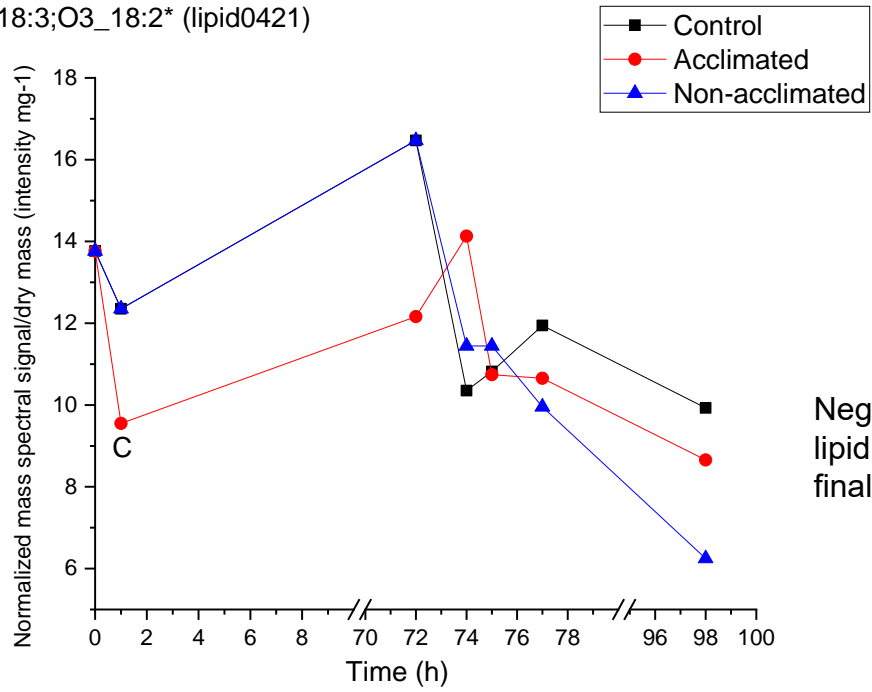

PC 18:3\_18:3;O2\* (lipid0378)

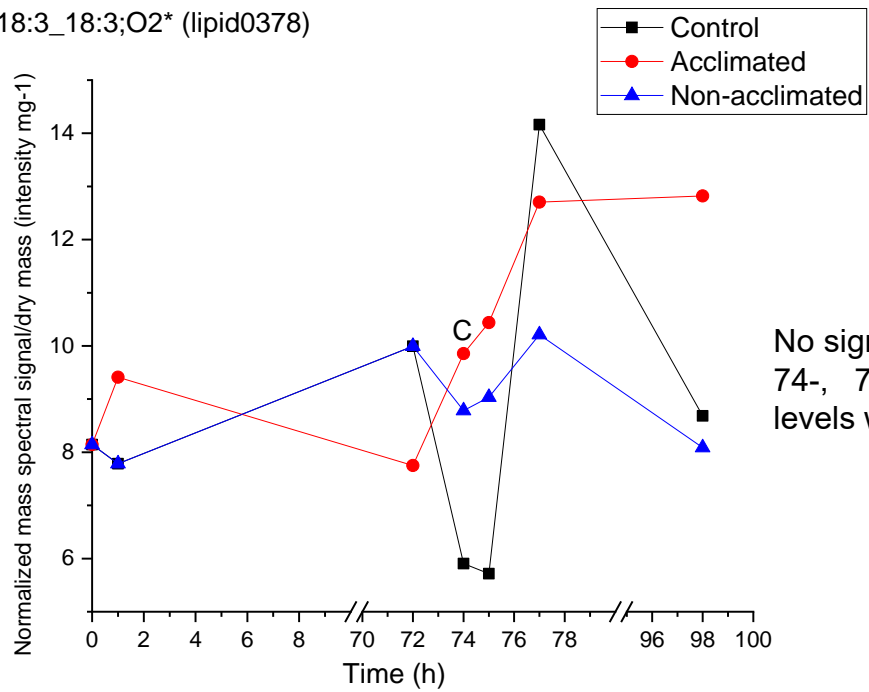

PE 16:0\_18:4;O2\* (lipid0604)

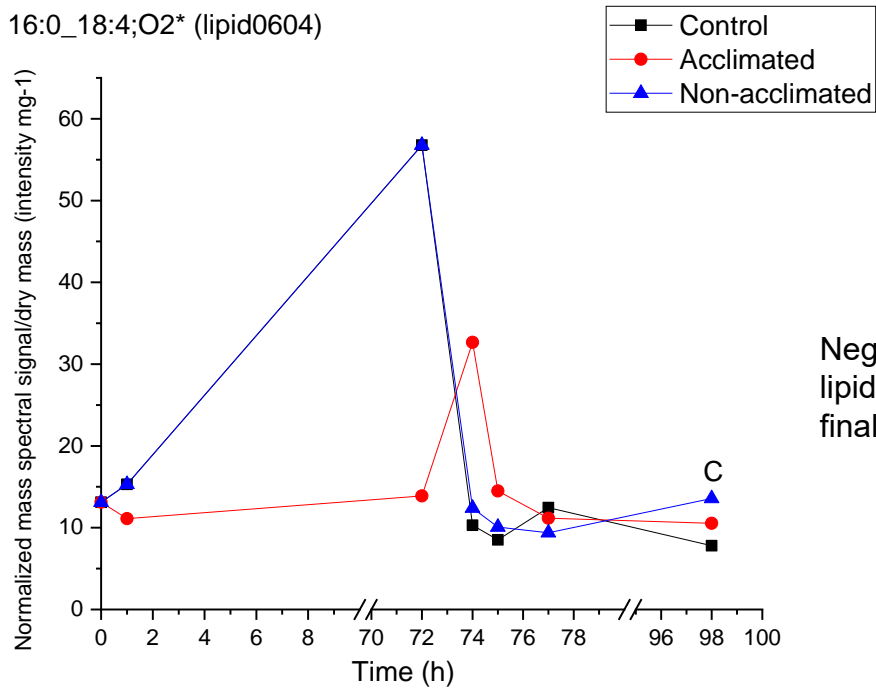

PE 18:2;O\_18:3 (lipid0429)

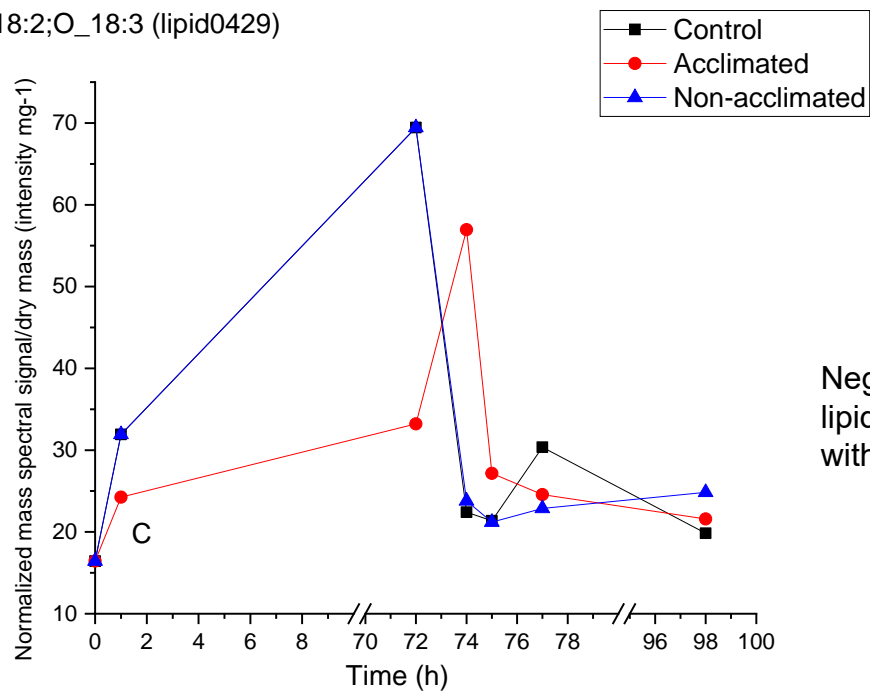



Figure S7. Time courses of levels of selected monoacyl polar lipids in rosettes of control, non-acclimated, and acclimated plants. Treatments are shown in Figure 1. Asterisks indicate lipids with quality control (pooled sample) levels less than 0.75 (\*) or 0.25 (\*\*) units of normalized mass spectral intensity, where 1 = intensity of 1 pmol of internal standard. "C" indicates that the lipid level in non-acclimated or acclimated plants is significantly different than the control level, and "A" indicates that the lipid level in non-acclimated plants is significantly different than the level in acclimated plants (Table S2). Indicated on each plot is whether there is significant correlation of lipid level at the 74-, 75-, and 77-h time points with final (98 h) ion leakage. Abbreviation: lysoPS (LPS).

| Lipid number | Panel | Class, oxidation   | Lipid name  |
|--------------|-------|--------------------|-------------|
| lipid0157    | 7A    | DGMG, non-oxidized | DGMG 16:0   |
| lipid0156    | 7A    | DGMG, non-oxidized | DGMG 16:3   |
| lipid0159    | 7B    | DGMG, non-oxidized | DGMG 18:3   |
| lipid0158    | 7B    | DGMG, oxidized     | DGMG 16:4;O |
| lipid0160    | 7C    | DGMG, oxidized     | DGMG 18:4;O |
| lipid0132    | 7C    | MGMG, non-oxidized | MGMG 16:3   |
| lipid0177    | 7D    | SQMG, non-oxidized | SQMG 16:0   |
| lipid0178    | 7D    | SQMG, non-oxidized | SQMG 18:3   |
| lipid0001    | 7E    | LPG, non-oxidized  | LPG 16:1    |
| lipid0025    | 7E    | LPC, non-oxidized  | LPC 16:0    |
| lipid0029    | 7F    | LPC, non-oxidized  | LPC 18:0**  |
| lipid0028    | 7F    | LPC, non-oxidized  | LPC 18:1*   |
| lipid0027    | 7G    | LPC, non-oxidized  | LPC 18:2    |
| lipid0026    | 7G    | LPC, non-oxidized  | LPC 18:3    |
| lipid0052    | 7H    | LPE, non-oxidized  | LPE 16:0    |
| lipid0055    | 7H    | LPE, non-oxidized  | LPE 18:1*   |
| lipid0054    | 7I    | LPE, non-oxidized  | LPE 18:2    |
| lipid0053    | 7I    | LPE, non-oxidized  | LPE 18:3    |
| lipid0792    | 7J    | LPI, non-oxidized  | LPI 16:0    |
| lipid0793    | 7J    | LPI, non-oxidized  | LPI 18:3    |
| lipid0796    | 7K    | LPS, non-oxidized  | LPS 16:0**  |

DGMG 16:0 (lipid0157)

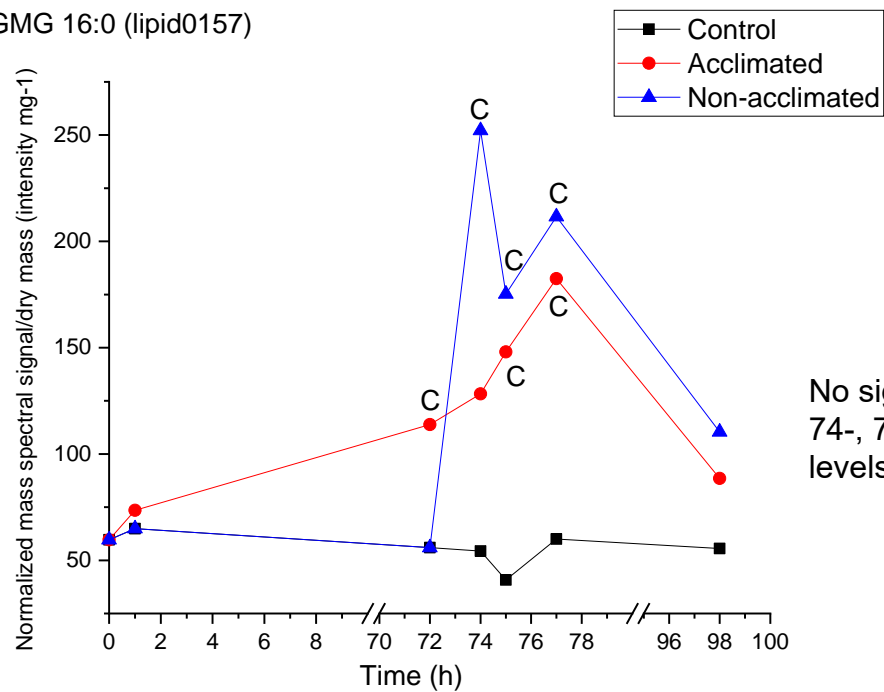

No significant correlation of 74-, 75-, and 77-h lipid levels with final ion leakage

DGMG 16:3 (lipid0156)

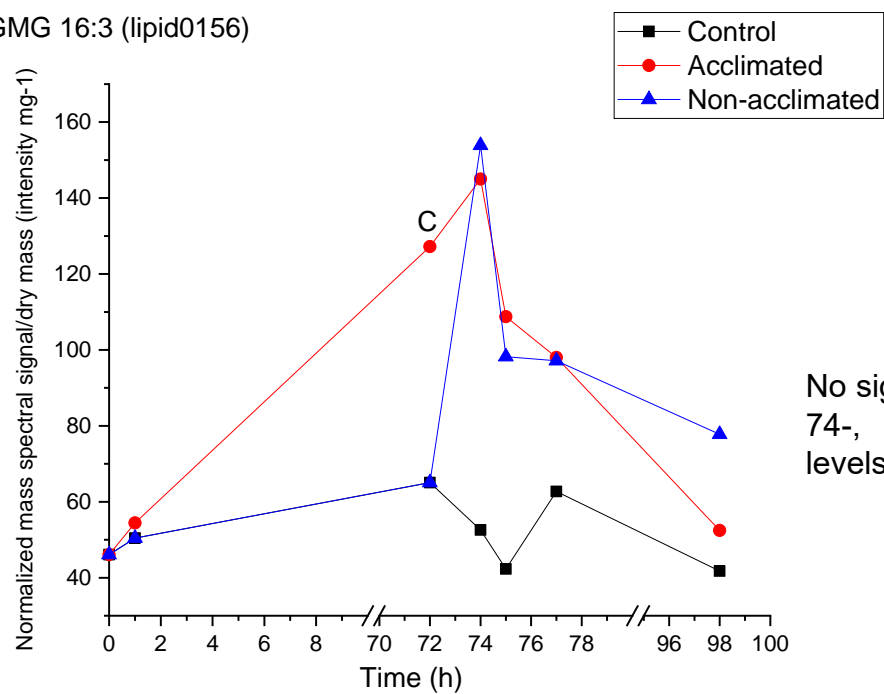

No significant correlation of 74-, 75-, and 77-h lipid levels with final ion leakage

DGMG 18:3 (lipid0159)

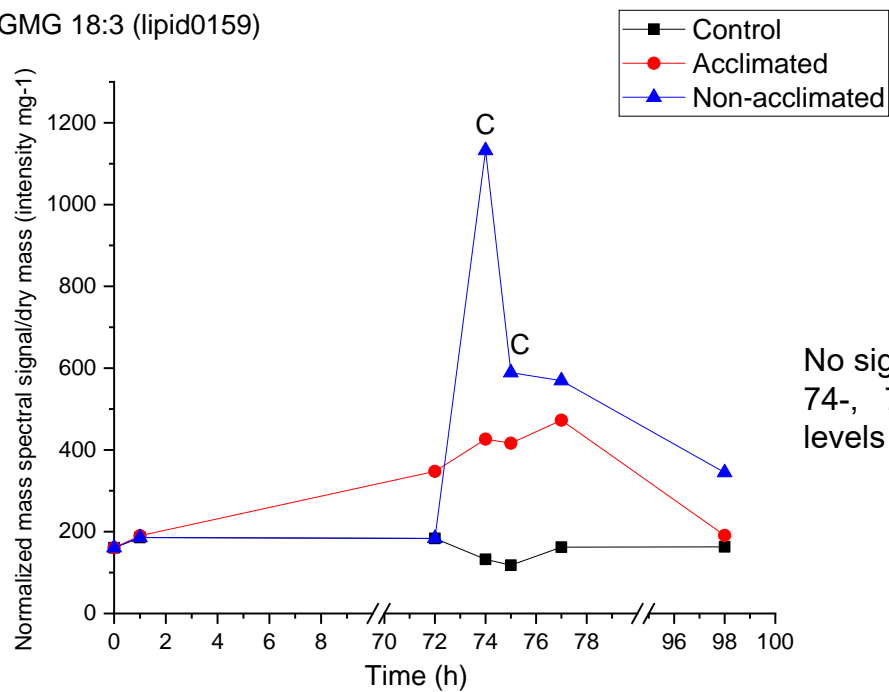

DGMG 16:4;O (lipid0158)

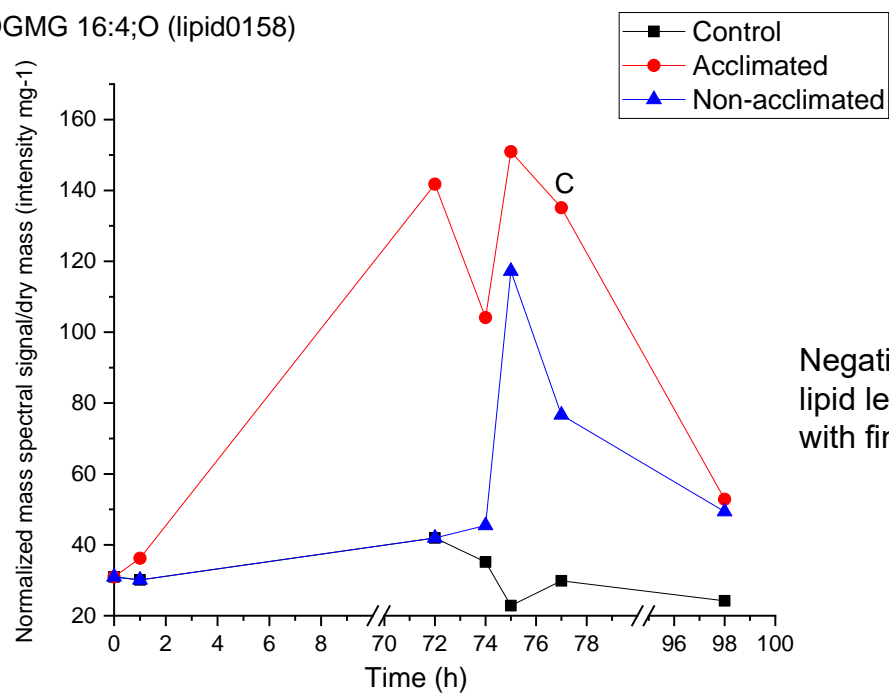

DGMG 18:4;O (lipid0160)

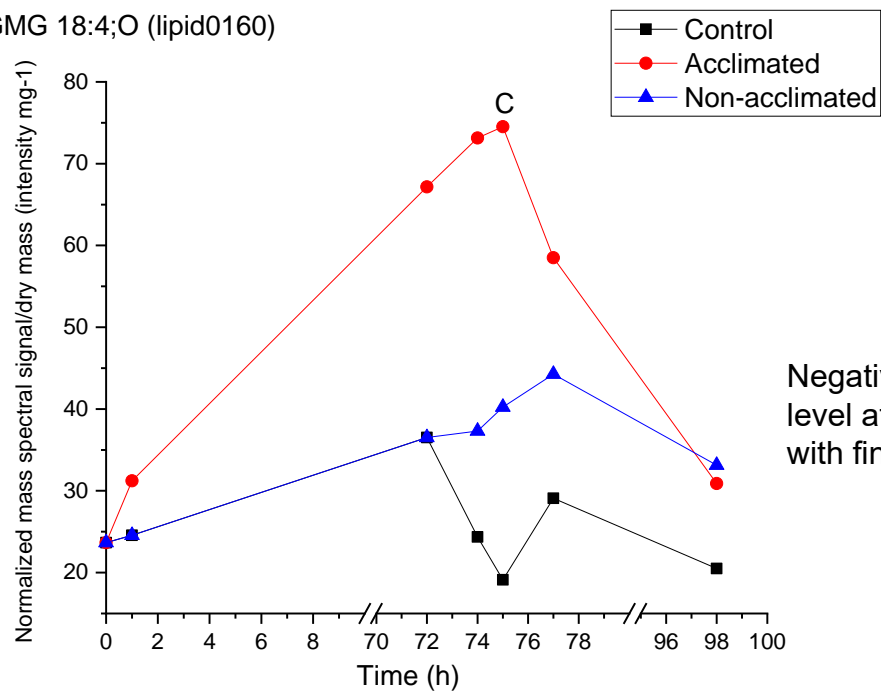

Negative correlation of lipid level at 74, 75, and 77 h with final ion leakage

MGMG 16:3 (lipid0132)

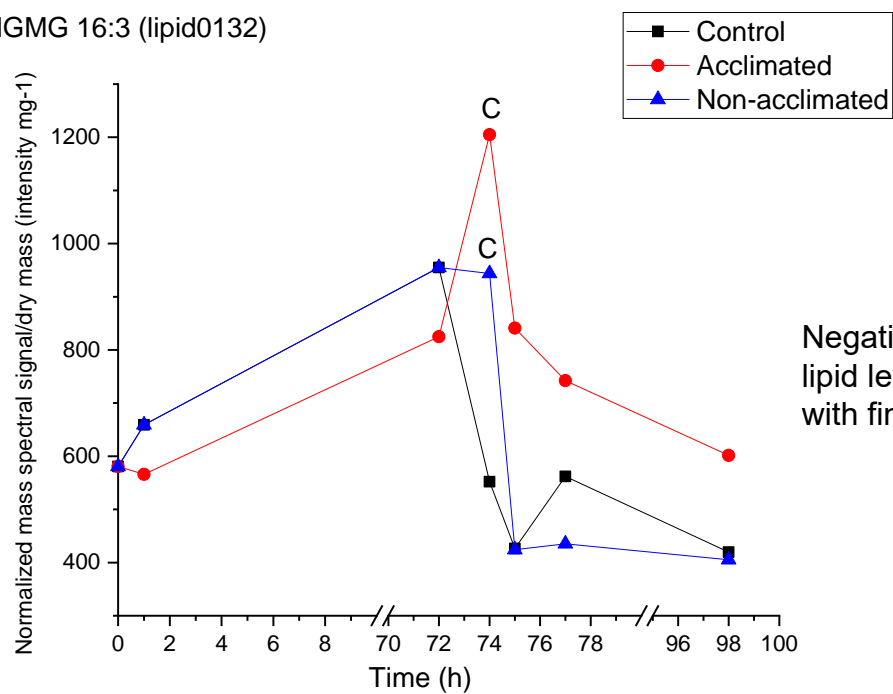

Negative correlation of lipid level at 75 and 77 h with final ion leakage

SQMG 16:0 (lipid0177)

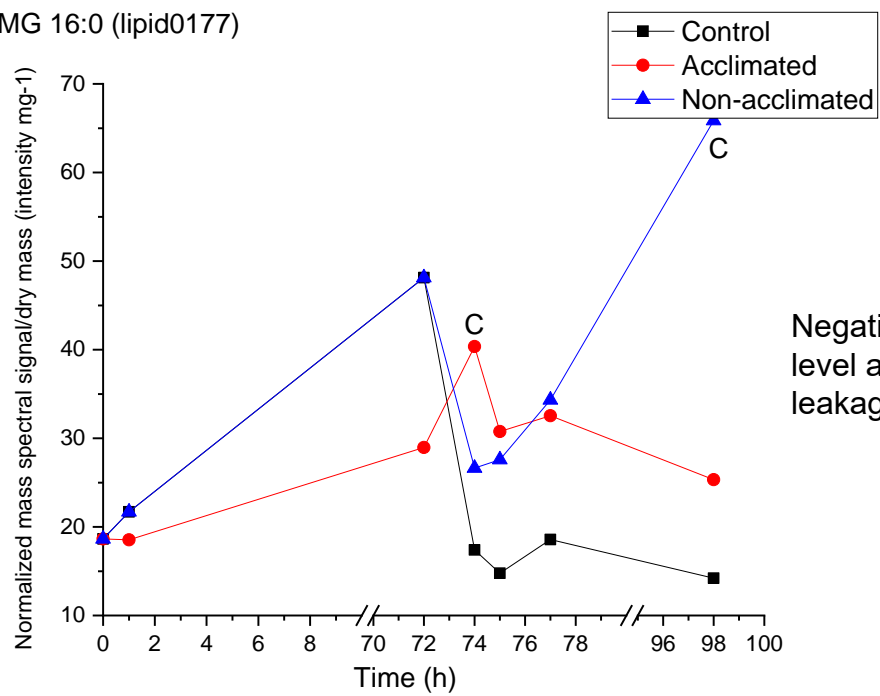

Negative correlation of lipid level at 74 h with final ion leakage

SQMG 18:3 (lipid0178)

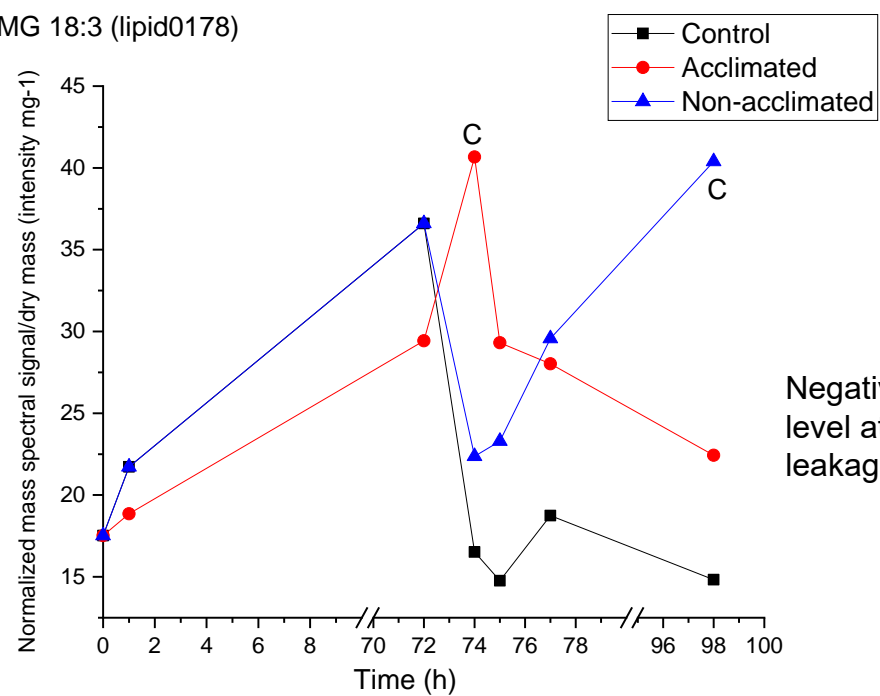

Negative correlation of lipid level at 74 h with final ion leakage

LPG 16:1 (lipid0001)

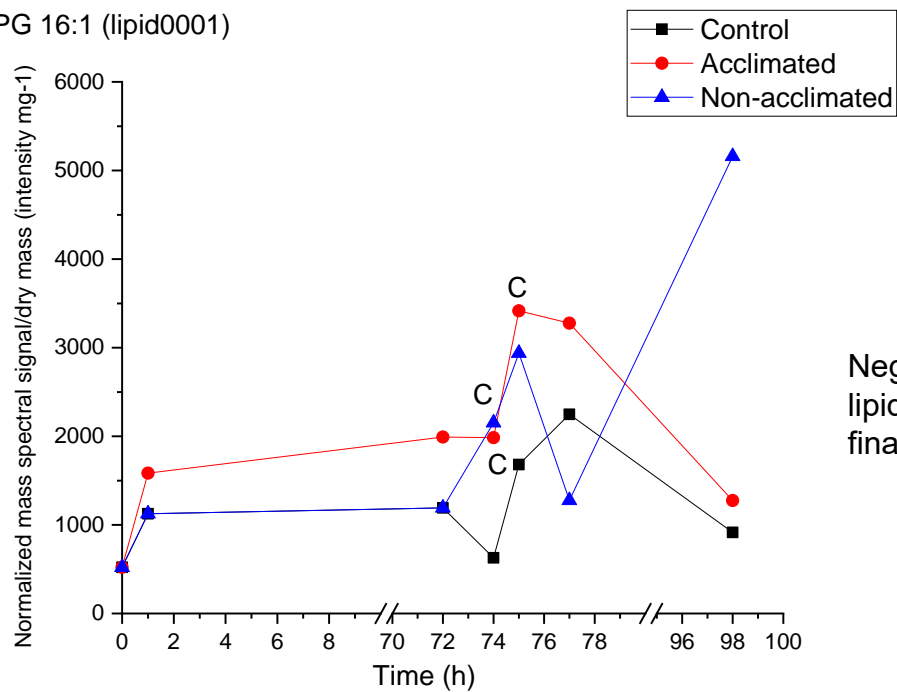

Negative correlation of lipid level at 77 h with final ion leakage

LPC 16:0 (lipid0025)

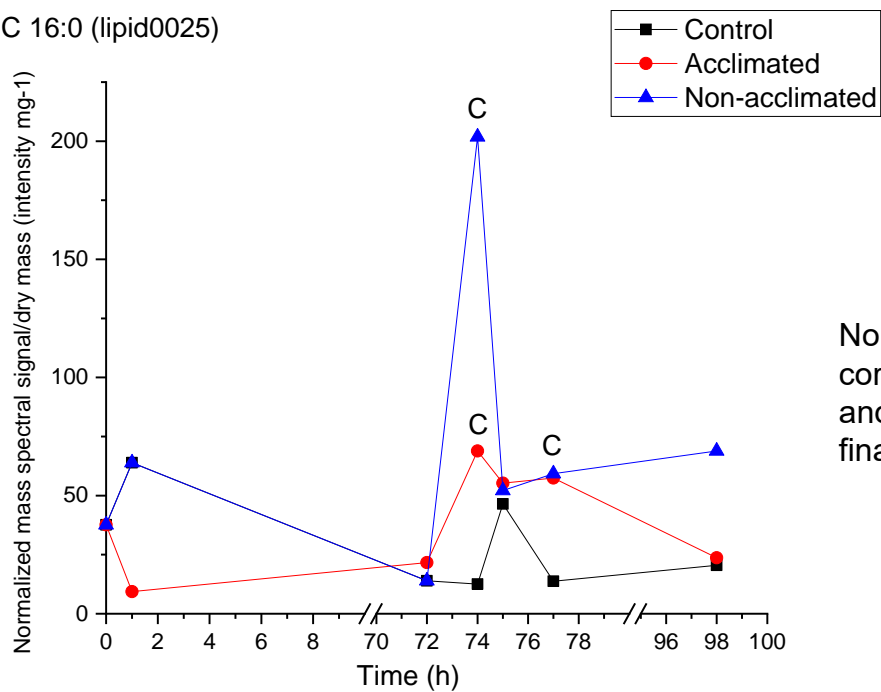

No significant correlation of 74-, 75-, and 77-h lipid levels with final ion leakage

LPC 18:0\*\* (lipid0029)

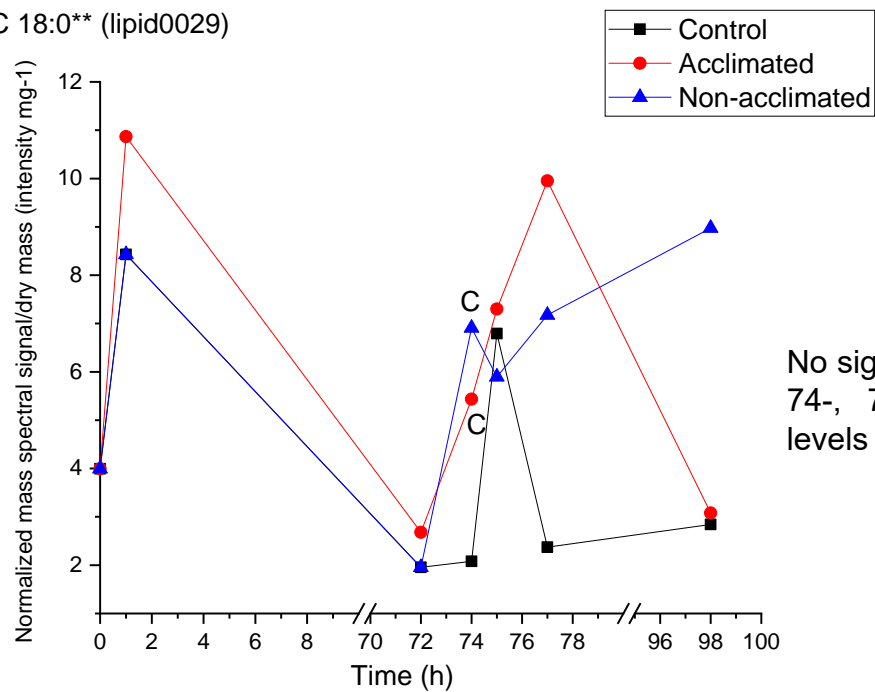

No significant correlation of 74-, 75-, and 77-h lipid levels with final ion leakage

LPC 18:1\* (lipid0028)

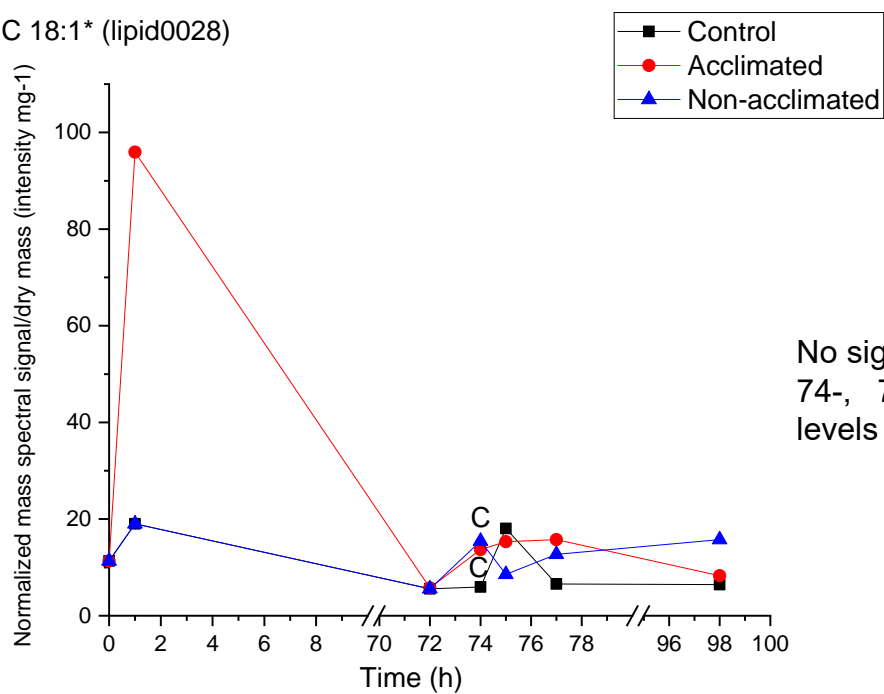

No significant correlation of 74-, 75-, and 77-h lipid levels with final ion leakage

LPC 18:2 (lipid0027)

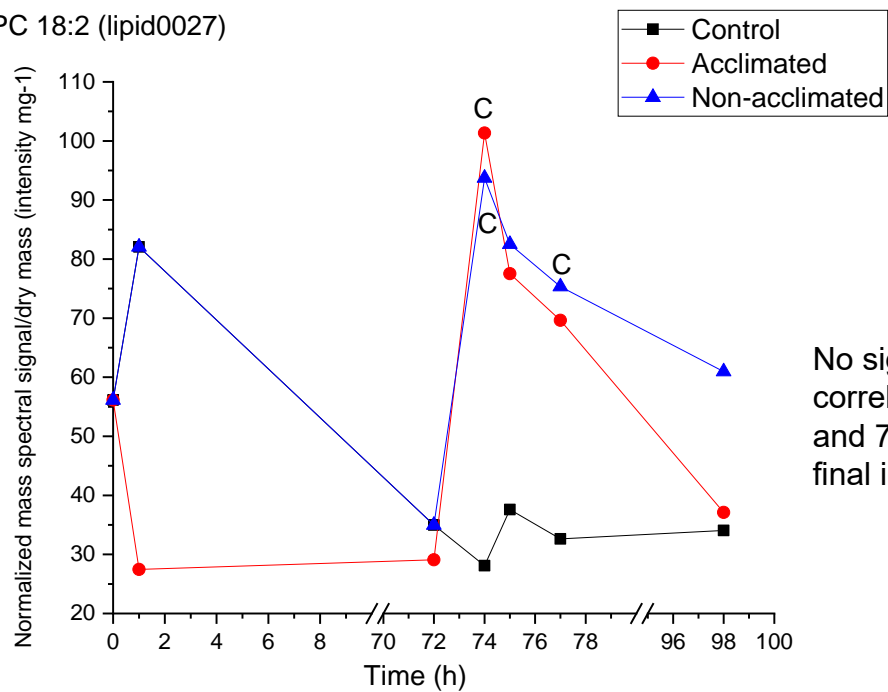

LPC 18:3 (lipid0026)

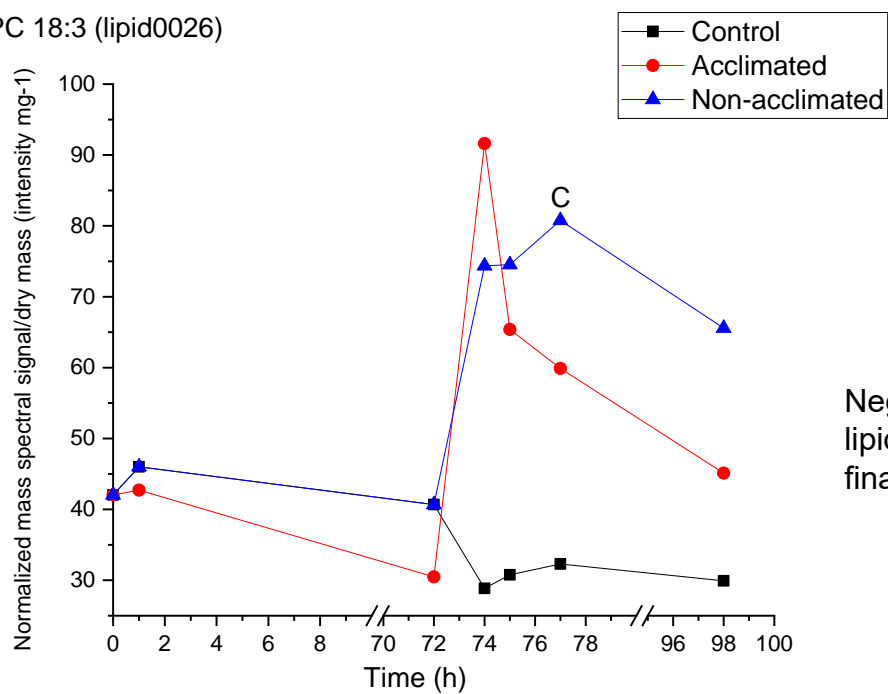



LPE 16:0 (lipid0052)

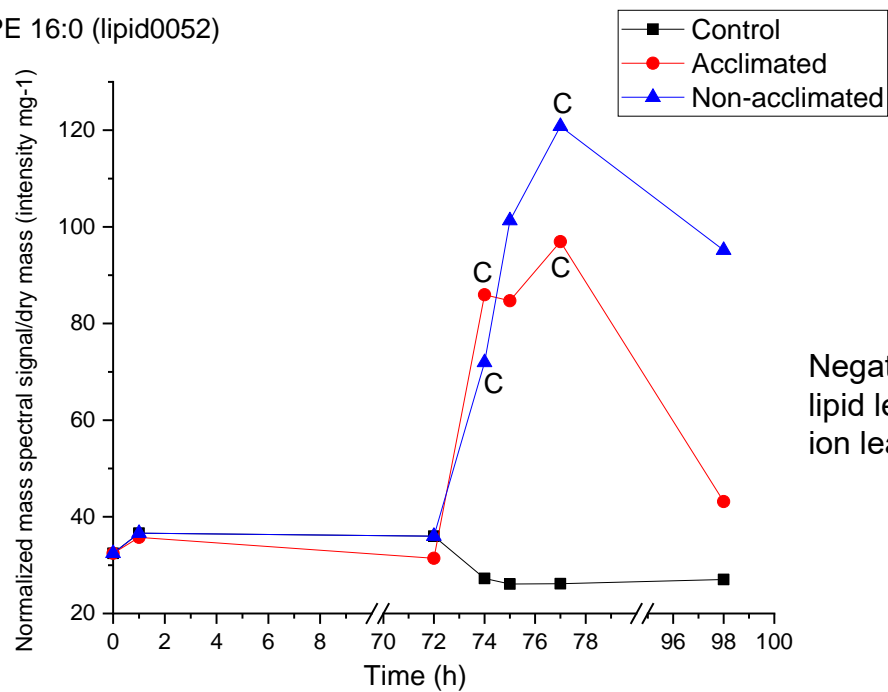

Negative correlation of lipid level at 74 h with final ion leakage

LPE 18:1\* (lipid0055)

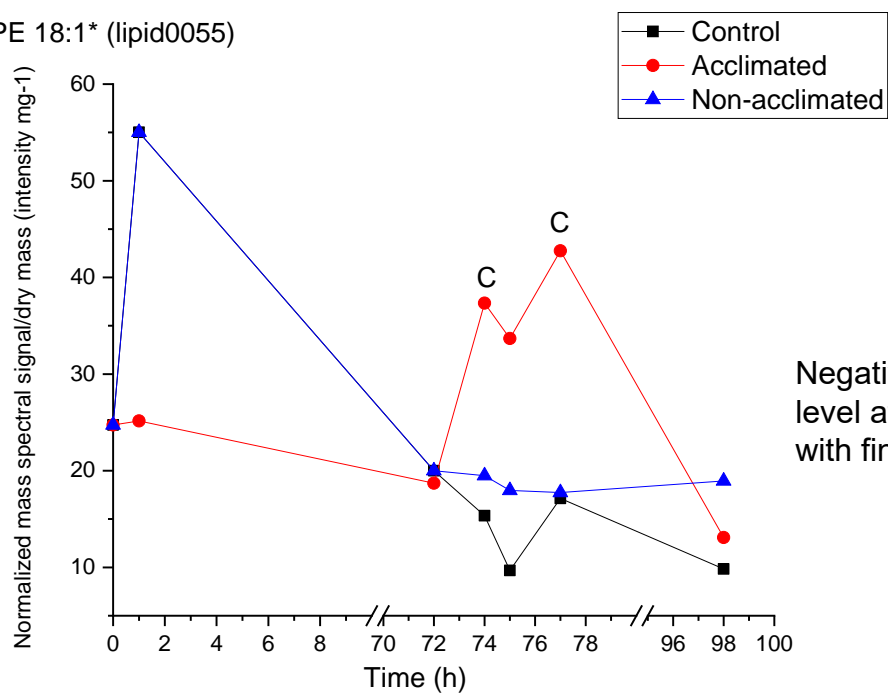

Negative correlation of lipid level at 74, 75, and 77 h with final ion leakage

LPE 18:2 (lipid0054)

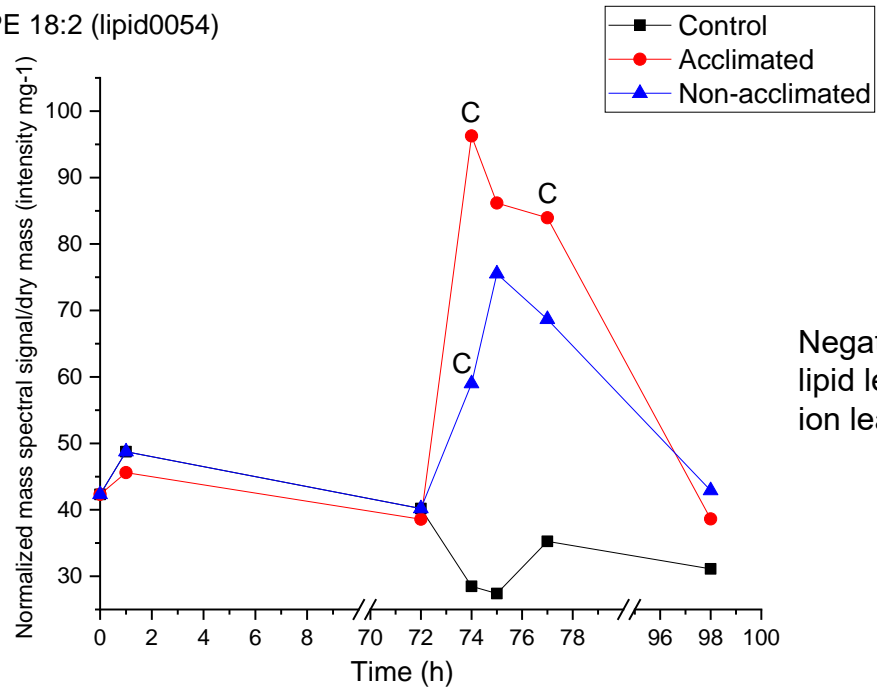

Negative correlation of lipid level at 74 h with final ion leakage

LPE 18:3 (lipid0053)

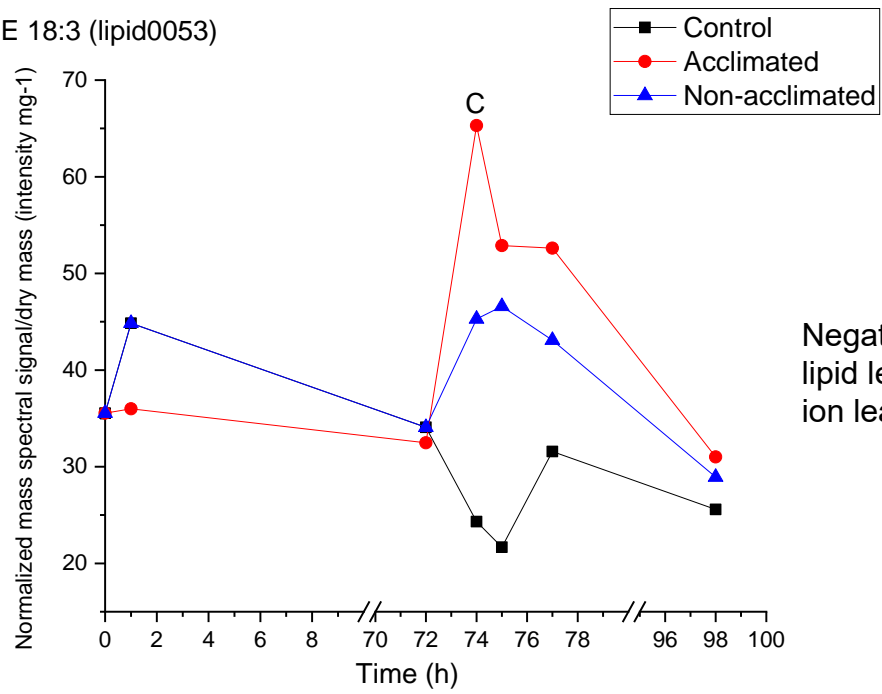

Negative correlation of lipid level at 74 h with final ion leakage

LPI 16:0 (lipid0792)

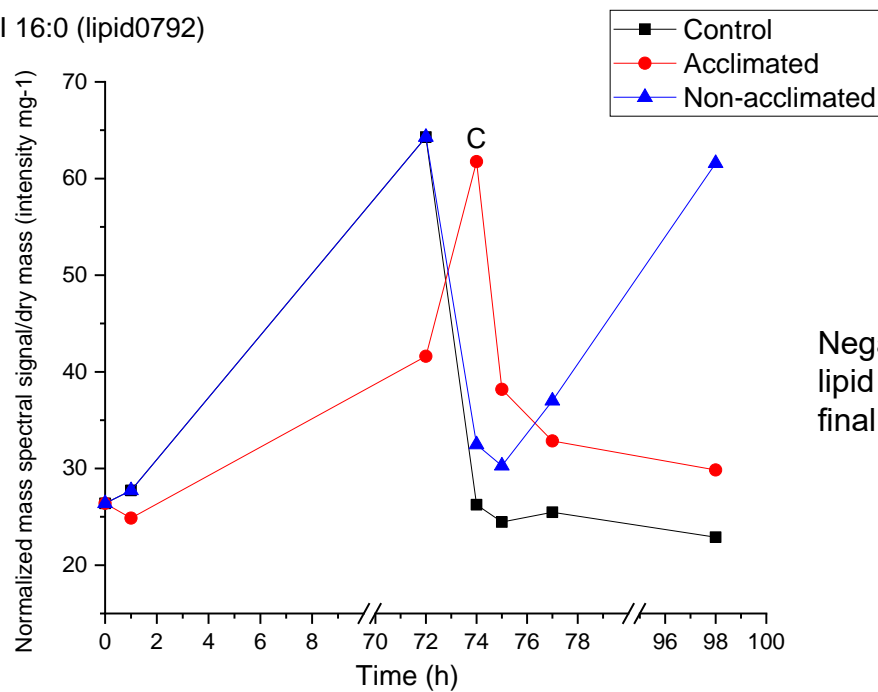

Negative correlation of lipid level at 74 h with final ion leakage

LPI 18:3 (lipid0793)

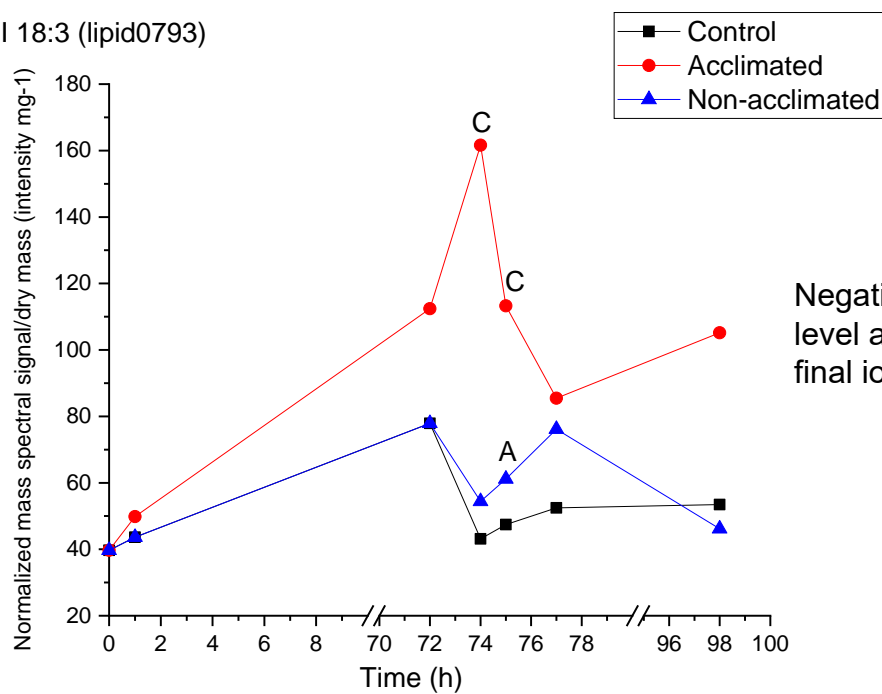

Negative correlation of lipid level at 74 and 75 h with final ion leakage

LPS 16:0\*\* (lipid0796)

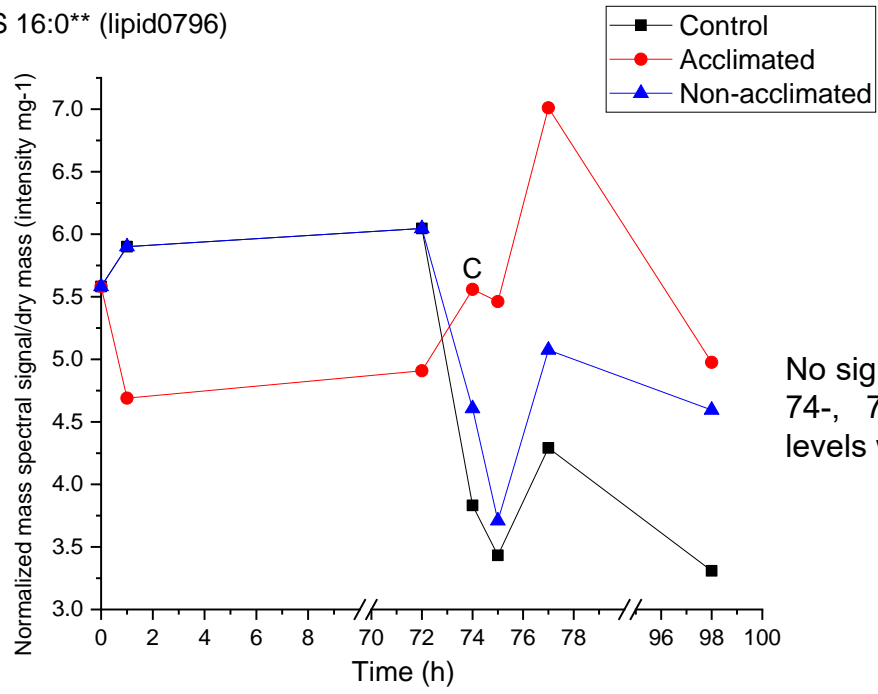

No significant correlation of 74-, 75-, and 77-h lipid levels with final ion leakage

Figure S8. Time courses of levels of neutral glycerolipids in rosettes of control, non-acclimated, and acclimated plants. Treatments are shown in Figure 1. Asterisks indicate lipids with quality control (pooled sample) levels less than 0.75 (\*) or 0.25 (\*\*) units of normalized mass spectral intensity, where 1 = intensity of 1 pmol of internal standard. "C" indicates that the lipid level in non-acclimated or acclimated plants is significantly different than the control level, and "A" indicates that the lipid level in non-acclimated plants is significantly different than the level in acclimated plants (Table S2). Indicated on each plot is whether there is significant correlation of lipid level at the 74-, 75-, and 77-h time points with final (98 h) ion leakage.

| Lipid number | Panel | Class, oxidation | Lipid name     |
|--------------|-------|------------------|----------------|
| lipid0283    | 8A    | DG, non-oxidized | DG 16:0_18:3*  |
| lipid0282    | 8A    | DG, non-oxidized | DG 16:1_18:3** |
| lipid0285    | 8B    | DG, non-oxidized | DG 18:2_18:3*  |
| lipid0281    | 8B    | DG, non-oxidized | DG 18:3_16:3** |
| lipid0286    | 8C    | DG, non-oxidized | DG 18:3_18:1** |
| lipid0284    | 8C    | DG, non-oxidized | DG 18:3_18:3*  |
| lipid0280    | 8D    | TG, non-oxidized | TG 18:2_36:5   |
| lipid0276    | 8D    | TG, non-oxidized | TG 18:3_34:2*  |
| lipid0278    | 8E    | TG, non-oxidized | TG 18:3_36:5   |
| lipid0277    | 8E    | TG, non-oxidized | TG 18:3_36:6   |

DG 16:0\_18:3\* (lipid0283)

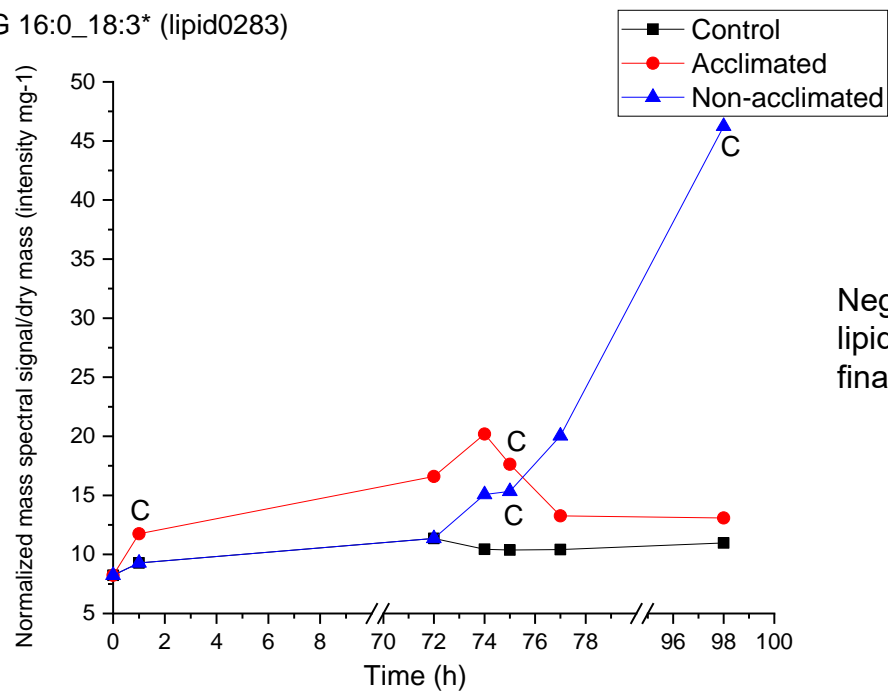

Negative correlation of lipid level at 75 h with final ion leakage

DG 16:1\_18:3\*\* (lipid0282)

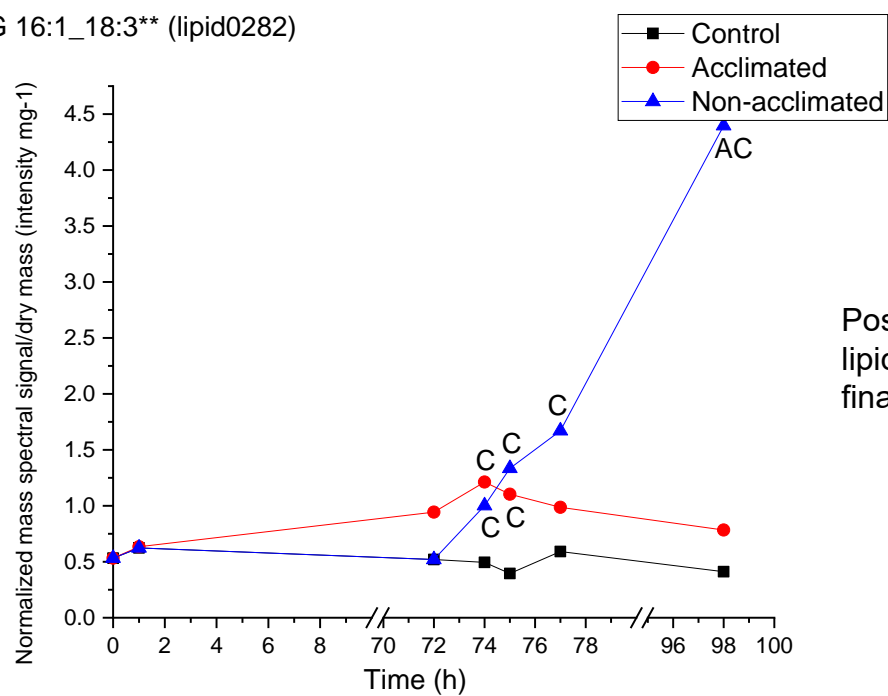

Positive correlation of lipid level at 77 h with final ion leakage

DG 18:2\_18:3\* (lipid0285)

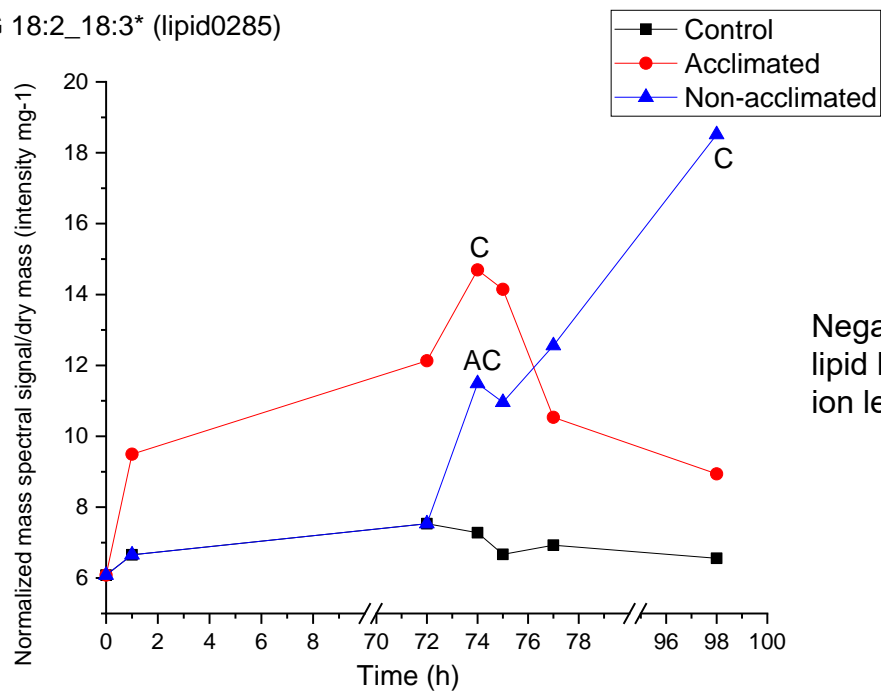

Negative correlation of lipid level at 75 h with final ion leakage

DG 18:3\_16:3\*\* (lipid0281)

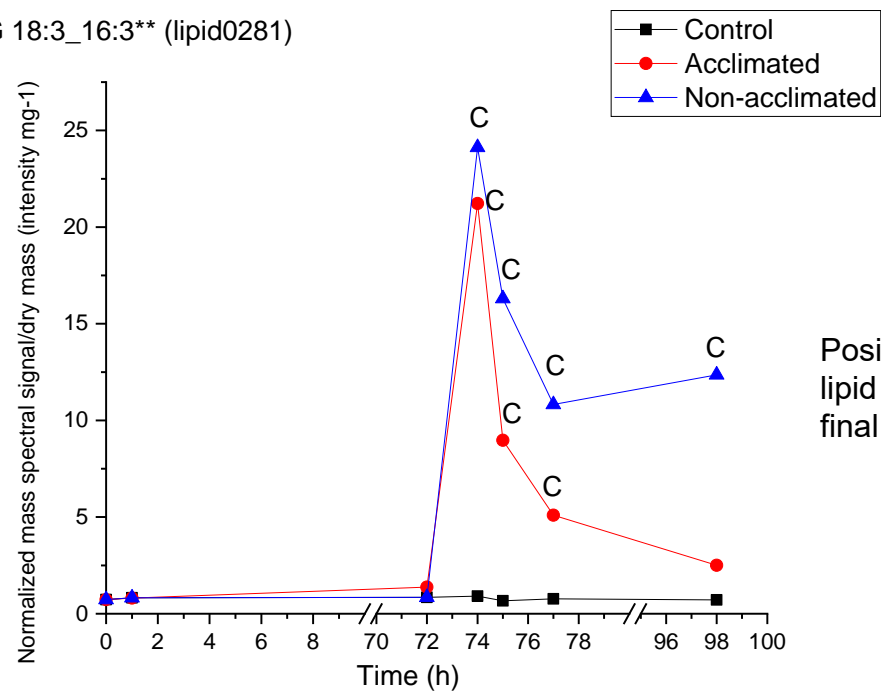

Positive correlation of lipid level at 77 h with final ion leakage

DG 18:3\_18:1\*\* (lipid0286)

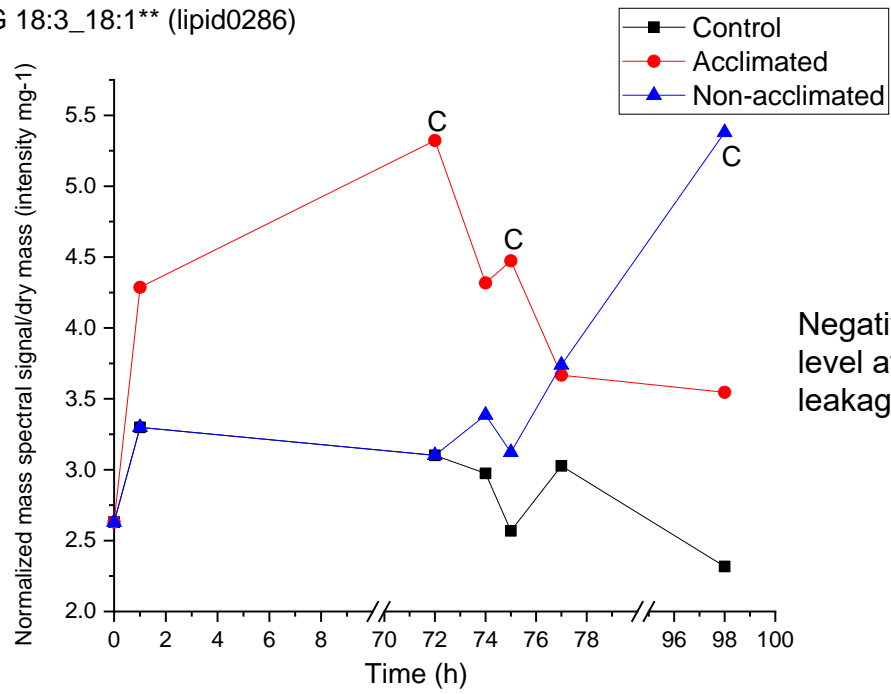

DG 18:3\_18:3\* (lipid0284)

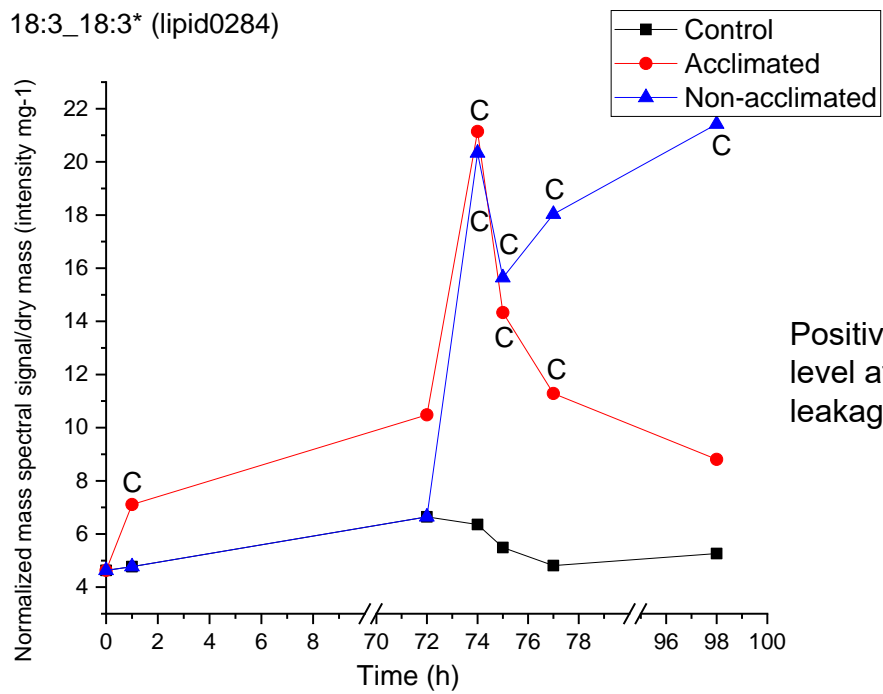



TG 18:2\_36:5 (lipid0280)

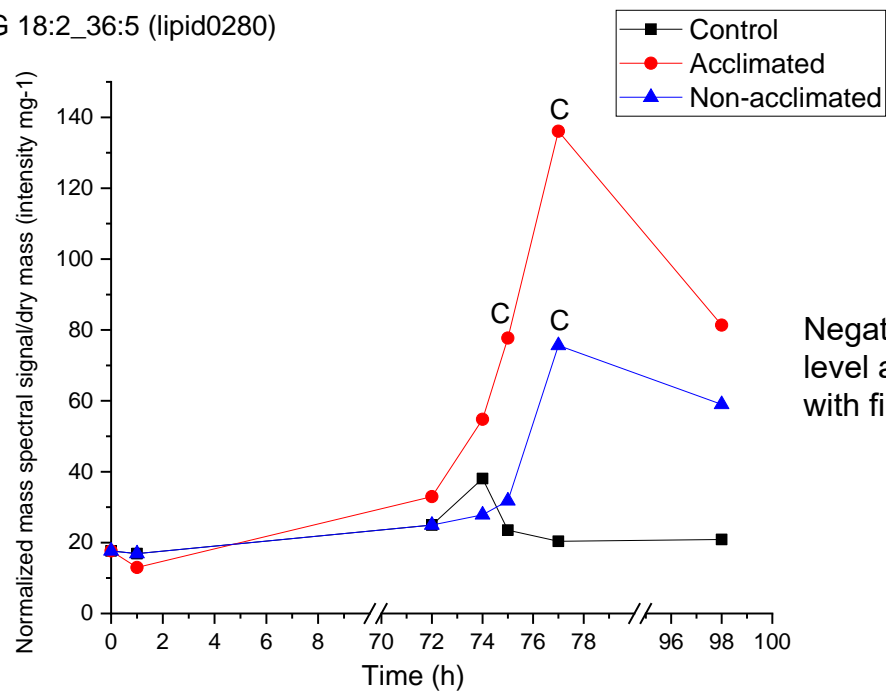

TG 18:3\_34:2\* (lipid0276)

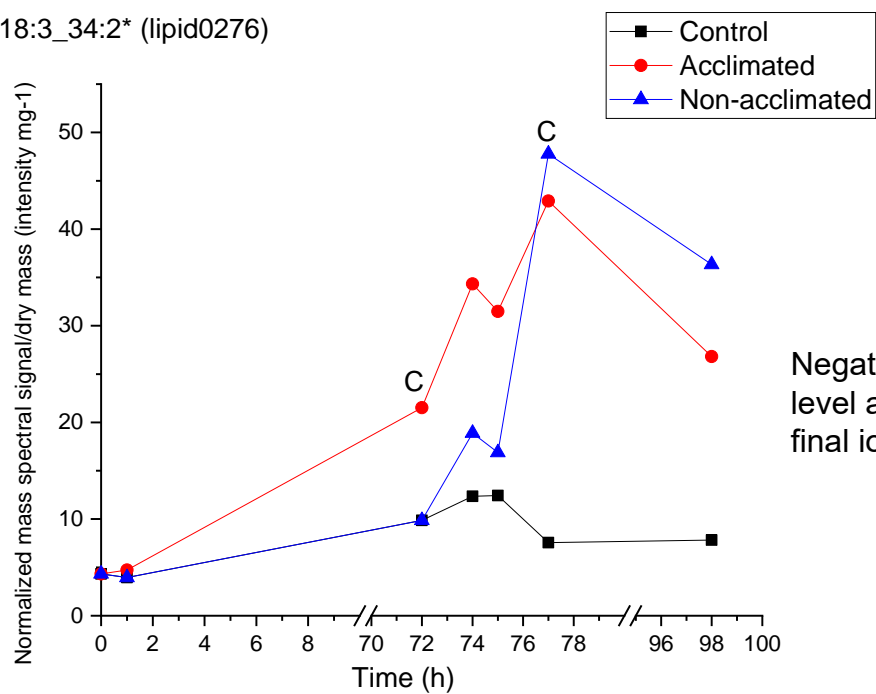

TG 18:3\_36:5 (lipid0278)

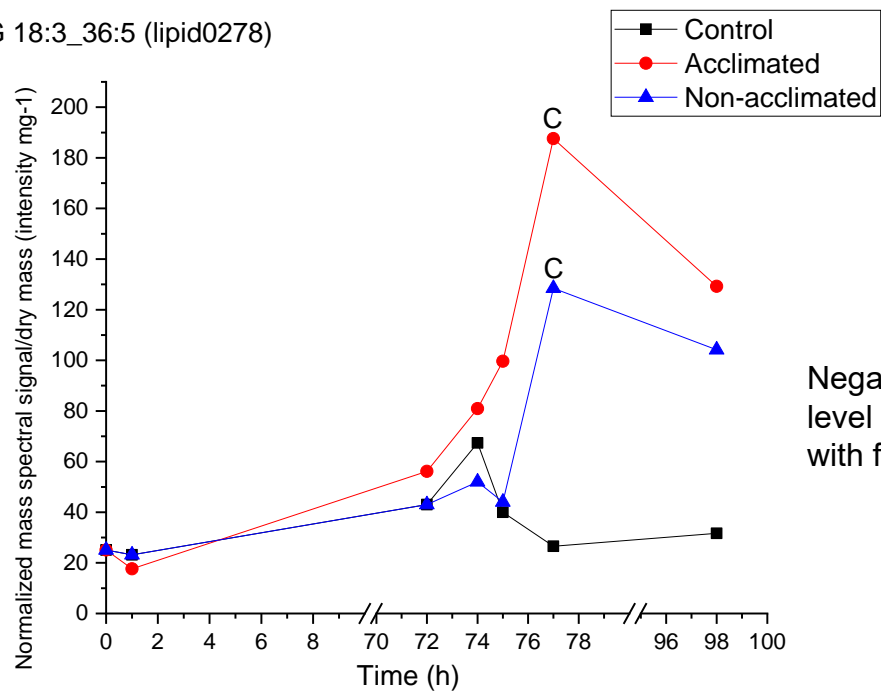

Negative correlation of lipid level at 74, 75, and 77 h with final ion leakage

TG 18:3\_36:6 (lipid0277)

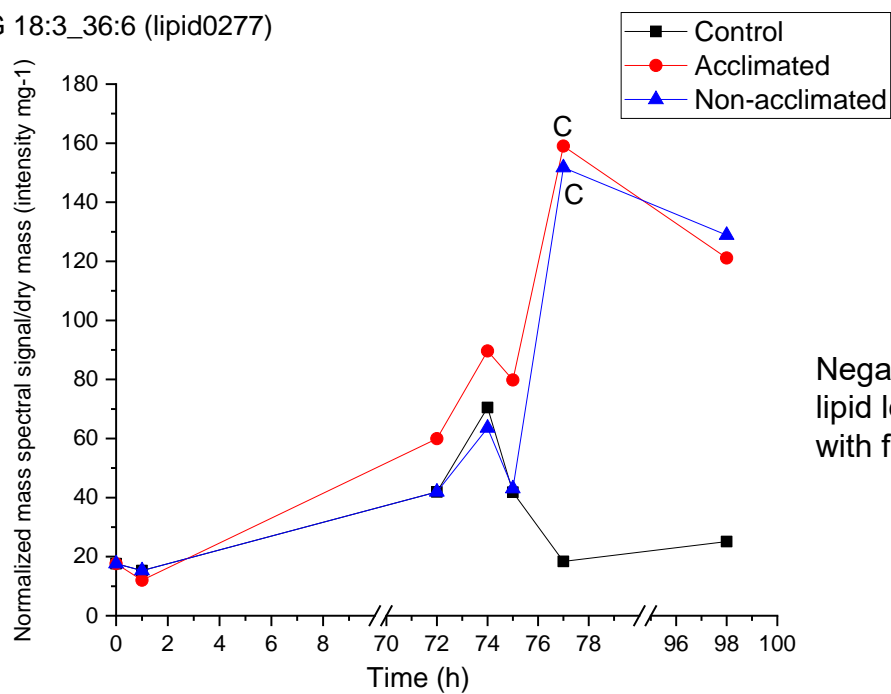

Negative correlation of lipid level at 74 and 75 h with final ion leakage

Figure S9. Time courses of levels of selected sterol derivatives in rosettes of control, non-acclimated, and acclimated plants. Treatments are shown in Figure 1. Asterisks indicate lipids with quality control (pooled sample) levels less than 0.75 (\*) or 0.25 (\*\*) units of normalized mass spectral intensity, where 1 = intensity of 1 pmol of internal standard. "C" indicates that the lipid level in non-acclimated or acclimated plants is significantly different than the control level, and "A" indicates that the lipid level in non-acclimated plants is significantly different than the level in acclimated plants (Table S2). Indicated on each plot is whether there is significant correlation of lipid level at the 74-, 75-, and 77-h time points with final (98 h) ion leakage.

| Lipid number | Panel | Class, oxidation                   | Lipid name              |
|--------------|-------|------------------------------------|-------------------------|
| lipid0255    | 9A    | Acyl sterol hexoside, non-oxidized | Campesterol-Hex 16:0    |
| lipid0258    | 9A    | Acyl sterol hexoside, non-oxidized | Campesterol-Hex 18:3    |
| lipid0257    | 9B    | Acyl sterol hexoside, non-oxidized | Sitosterol-Hex 16:0     |
| lipid0263    | 9B    | Acyl sterol hexoside, non-oxidized | Sitosterol-Hex 18:2     |
| lipid0260    | 9C    | Acyl sterol hexoside, non-oxidized | Sitosterol-Hex 18:3     |
| lipid0256    | 9C    | Acyl sterol hexoside, non-oxidized | Stigmasterol-Hex 16:0   |
| lipid0259    | 9D    | Acyl sterol hexoside, non-oxidized | Stigmasterol-Hex 18:3   |
| lipid0816    | 9D    | Acyl sterol hexoside, oxidized     | Campesterol-Hex 18:4;O  |
| lipid0818    | 9E    | Acyl sterol hexoside, oxidized     | Sitosterol-Hex 18:4;O   |
| lipid0817    | 9E    | Acyl sterol hexoside, oxidized     | Stigmasterol-Hex 18:4;O |
| lipid0287    | 9F    | Sterol ester, non-oxidized         | Campesterol 18:3**      |
| lipid0821    | 9F    | Sterol ester, non-oxidized         | Sitosterol 18:2*        |
| lipid0289    | 9G    | Sterol ester, non-oxidized         | Sitosterol 18:3*        |
| lipid0825    | 9G    | Sterol ester, oxidized             | Campesterol 18:4;O**    |
| lipid0827    | 9H    | Sterol ester, oxidized             | Sitosterol 18:4;O**     |
| lipid0826    | 9H    | Sterol ester, oxidized             | Stigmasterol 18:4;O**   |

Campesterol-Hex 16:0 (lipid0255)

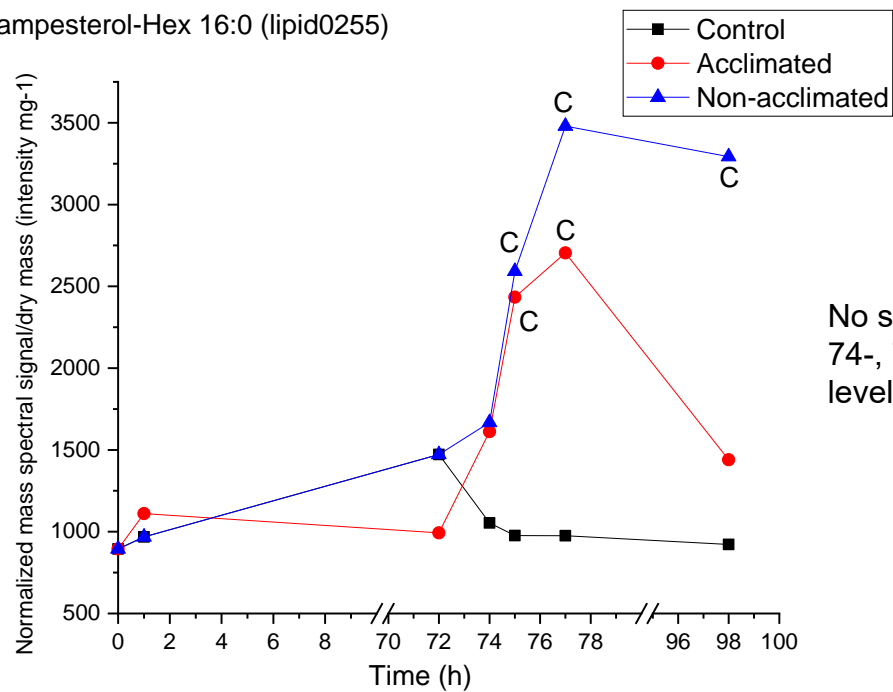

No significant correlation of 74-, 75-, and 77-h lipid levels with final ion leakage

Campesterol-Hex 18:3 (lipid0258)

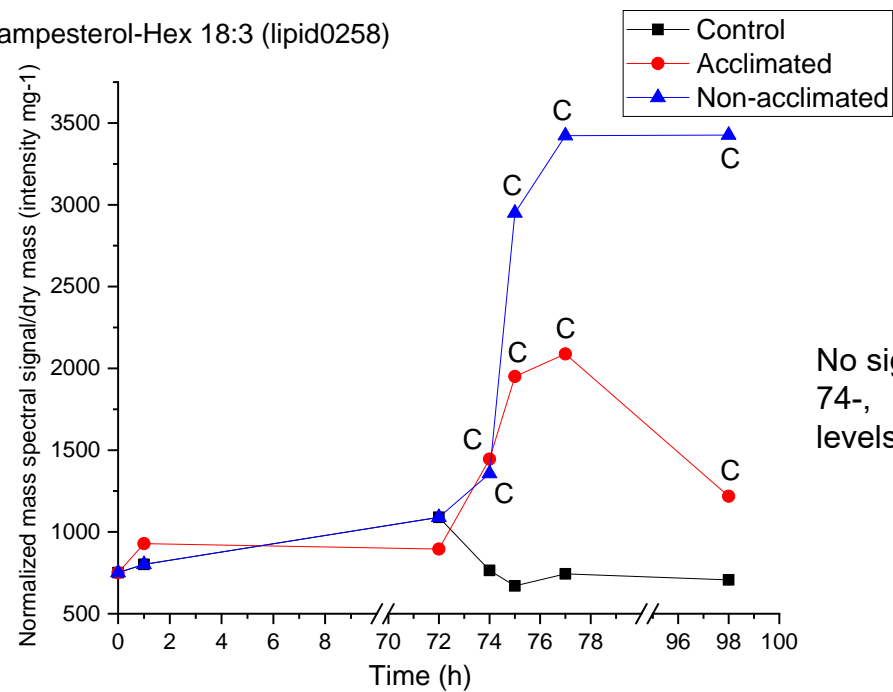

No significant correlation of 74-, 75-, and 77-h lipid levels with final ion leakage

Sitosterol-Hex 16:0 (lipid0257)

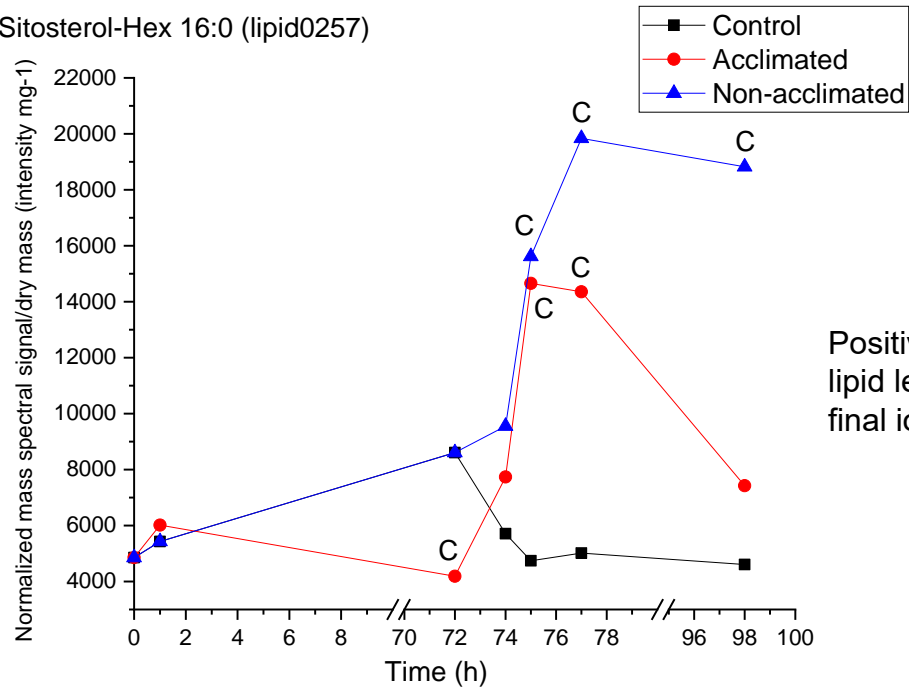

Positive correlation of lipid level at 74 h with final ion leakage

Sitosterol-Hex 18:2 (lipid0263)

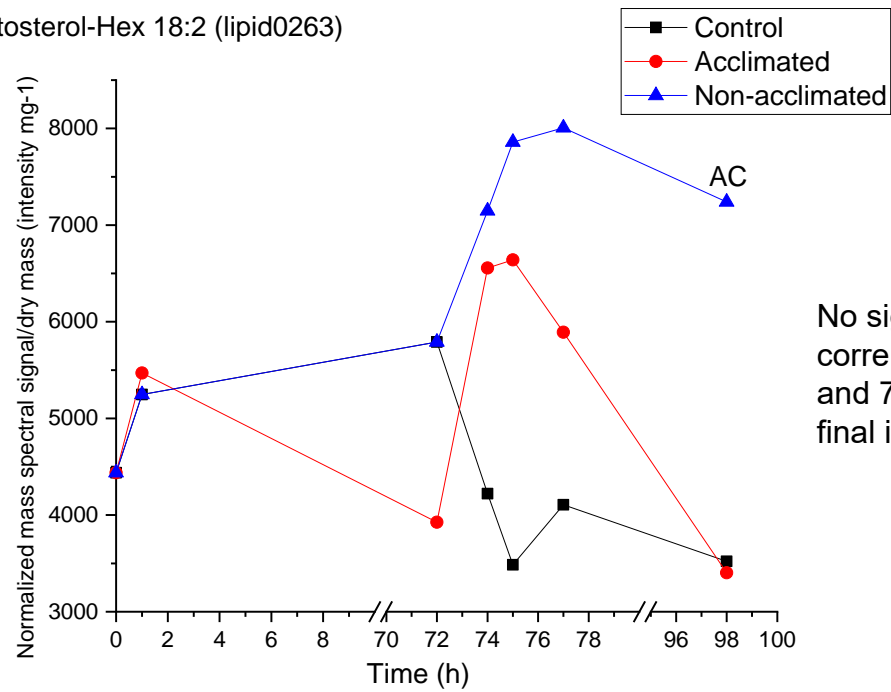

No significant correlation of 74-, 75-, and 77-h lipid levels with final ion leakage

Sitosterol-Hex 18:3 (lipid0260)

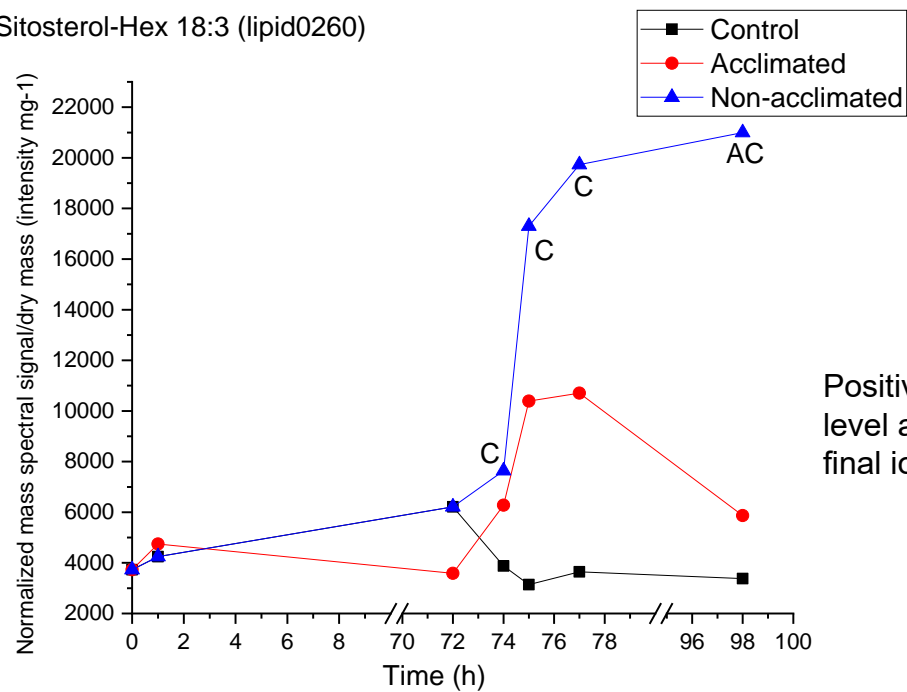

Positive correlation of lipid level at 74 and 77 h with final ion leakage

Stigmasterol-Hex 16:0 (lipid0256)

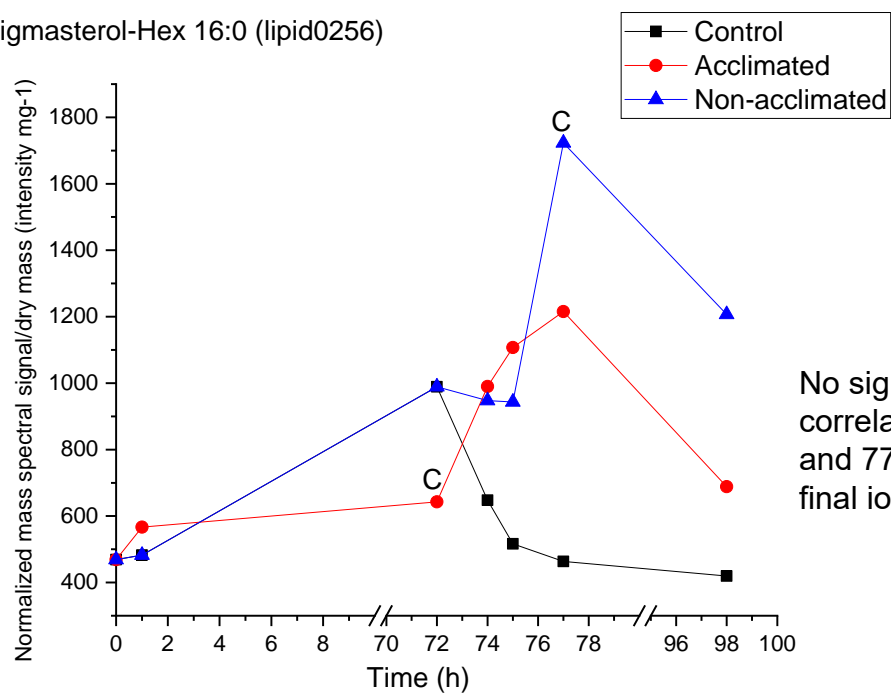

No significant correlation of 74-, 75-, and 77-h lipid levels with final ion leakage

Stigmasterol-Hex 18:3 (lipid0259)

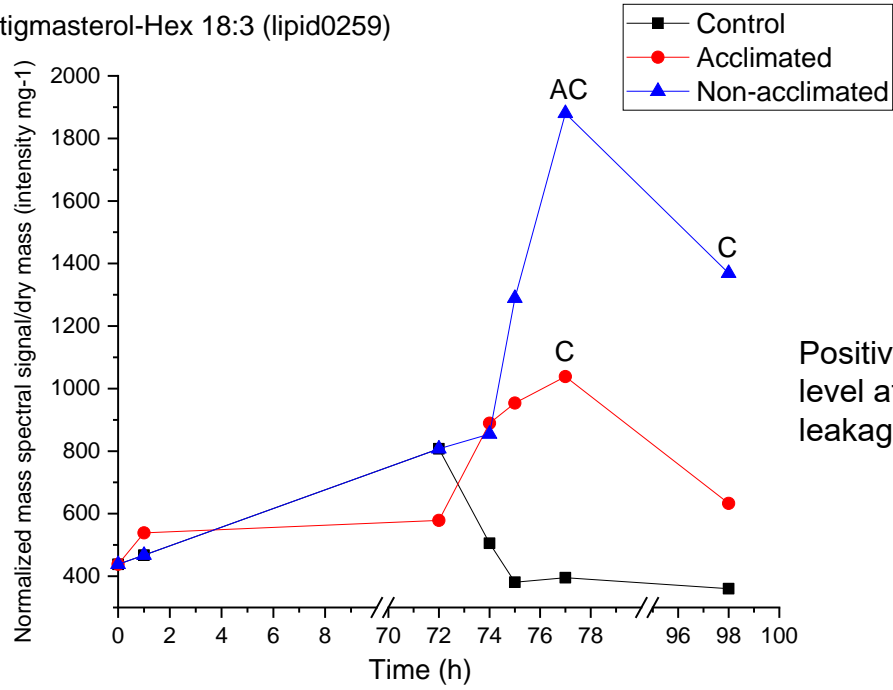

Positive correlation of lipid level at 77 h with final ion leakage

Campesterol-Hex 18:4;O (lipid0816)

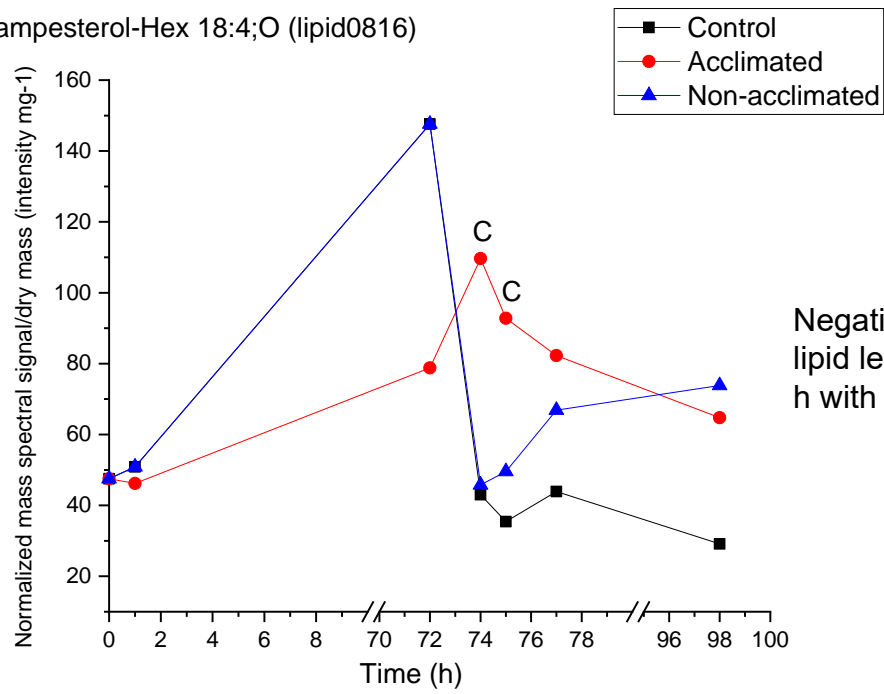

Negative correlation of lipid level at 74, 75, and 77 h with final ion leakage

Sitosterol-Hex 18:4;O (lipid0818)

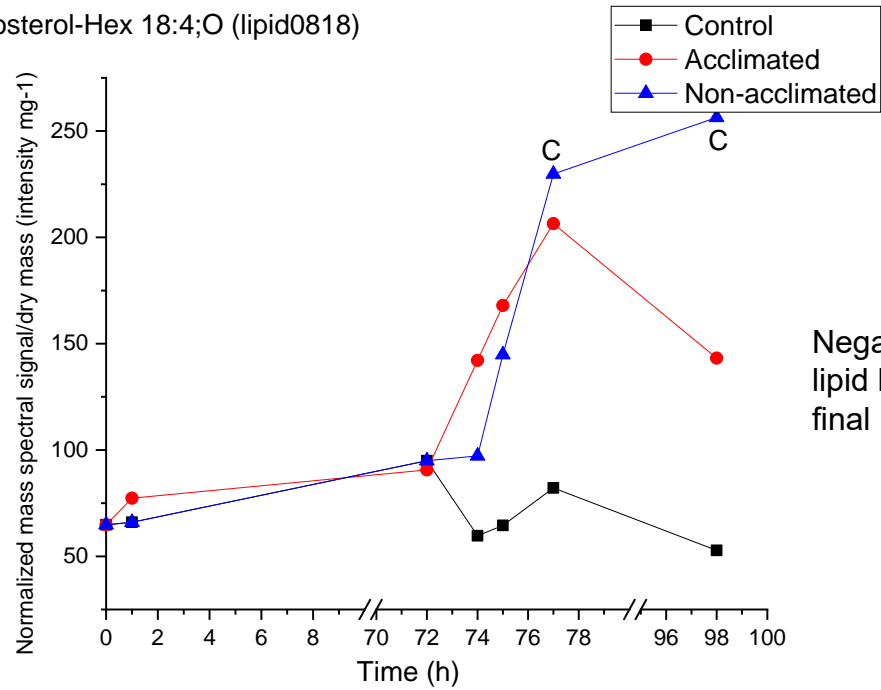

Negative correlation of lipid level at 75 h with final ion leakage

Stigmasterol-Hex 18:4;O (lipid0817)

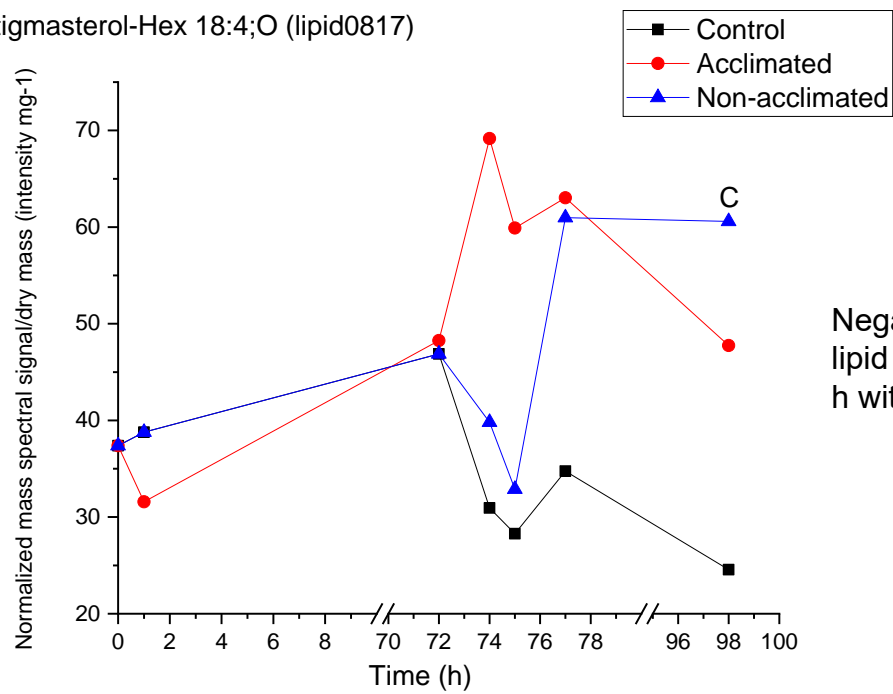

Negative correlation of lipid level at 74 and 75 h with final ion leakage



Campesterol 18:3\*\* (lipid0287)

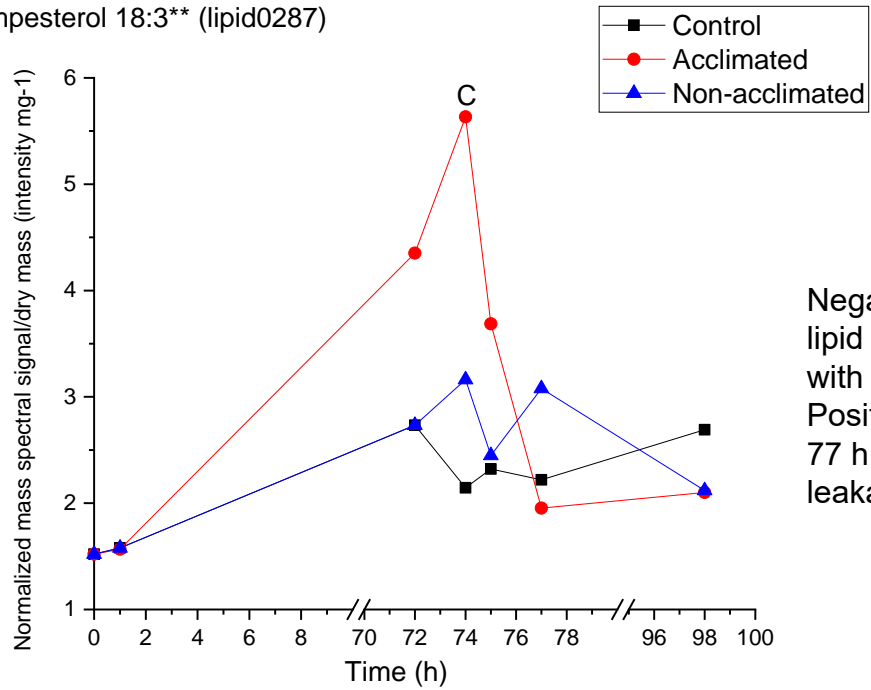

Negative correlation of lipid level at 74 and 75 h with final ion leakage  
Positive correlation at 77 h with final ion leakage

Sitosterol 18:2\* (lipid0821)

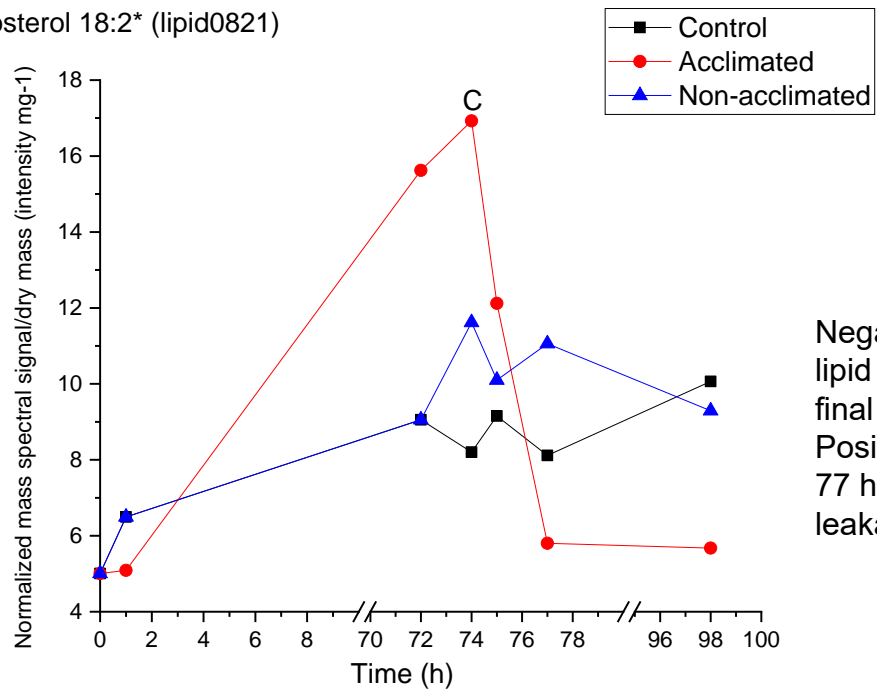

Negative correlation of lipid level at 74 h with final ion leakage  
Positive correlation at 77 h with final ion leakage

Sitosterol 18:3\* (lipid0289)

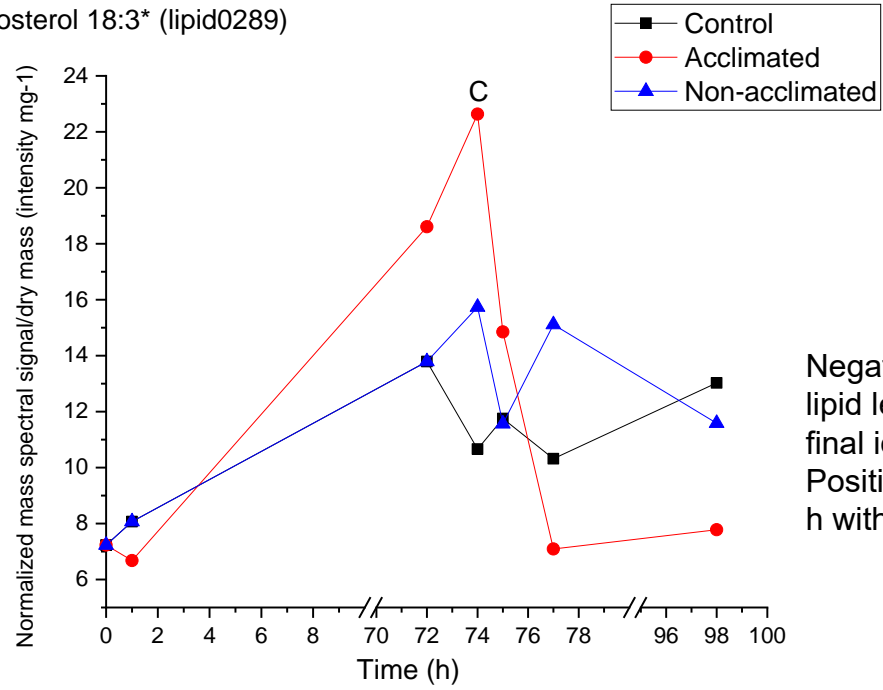

Negative correlation of lipid level at 74 h with final ion leakage  
Positive correlation at 77 h with final ion leakage

Campesterol 18:4;O\*\* (lipid0825)

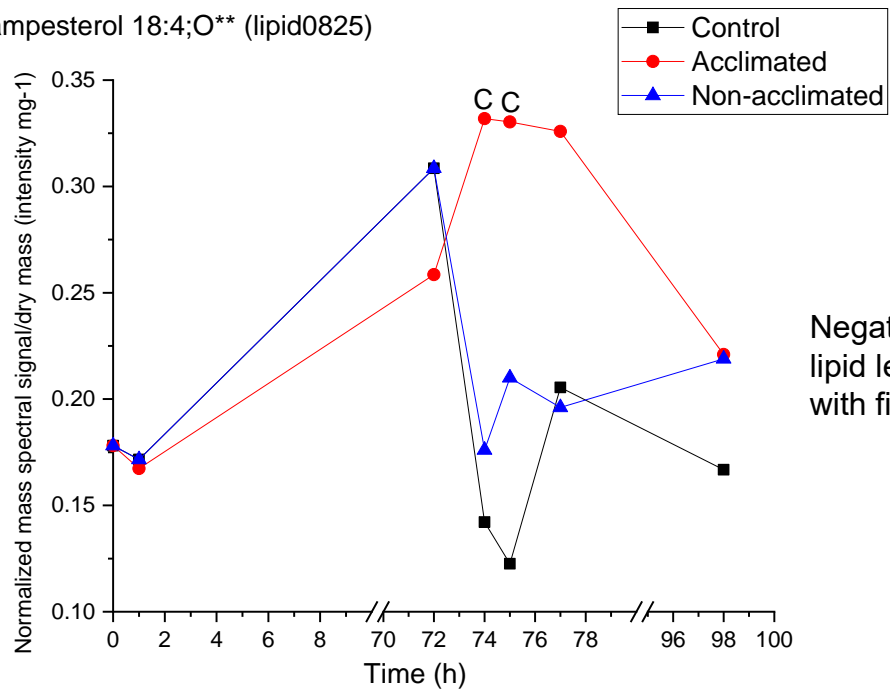

Negative correlation of lipid level at 74 and 75 h with final ion leakage

Sitosterol 18:4;O\*\* (lipid0827)

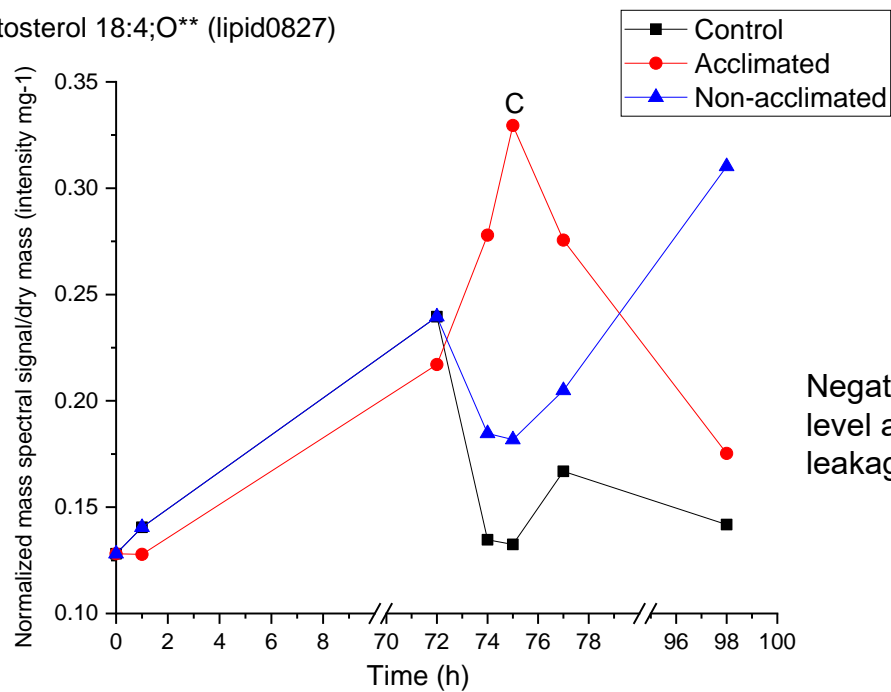

Negative correlation of lipid level at 75 h with final ion leakage

Stigmasterol 18:4;O\*\* (lipid0826)

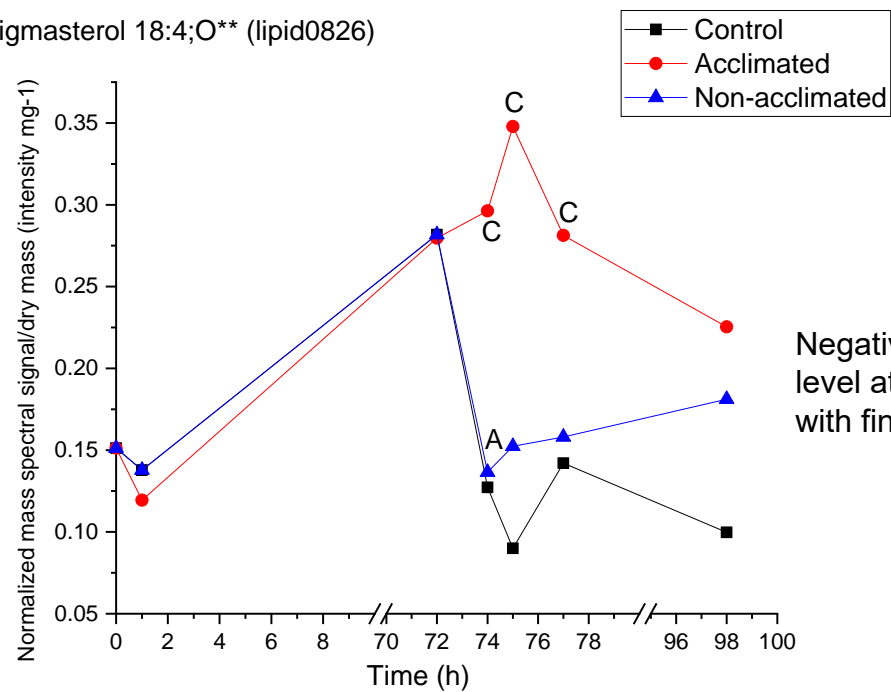

Negative correlation of lipid level at 74, 75, and 77 h with final ion leakage

Figure S10. Time courses of levels of ion leakage and selected lipids in rosettes of control, non-acclimated, and acclimated wild-type and *opr3* plants. Treatments are shown in Figure 1. Wild-type plants are indicated by “WT” after the treatment, and mutants are indicated by “opr3”. Asterisks in lipid names indicate lipids with quality control (pooled sample) levels less than 0.75 (\*) or 0.25 (\*\*) units of normalized mass spectral intensity, where 1 = intensity of 1 pmol of internal standard. Asterisks on the graphs indicate that the measured value is significantly different for the *opr3* mutant compared to wild-type plants that underwent the same treatment. Abbreviation: lysoPA (LPA).

| Lipid number | Panel | Measured parameter (new Lipid Maps nomenclature or similar) |
|--------------|-------|-------------------------------------------------------------|
|--------------|-------|-------------------------------------------------------------|

10A Ion leakage

**Oxidized, diacyl plastidic lipids containing OPDA**

|           |     |                                                         |
|-----------|-----|---------------------------------------------------------|
| lipid0323 | 10B | MGDG 18:3_16:4;O                                        |
| lipid0358 | 10B | MGDG 18:4;O_16:3                                        |
| lipid0325 | 10C | MGDG 18:4;O_16:4;O (16:4;O as fragment; Arabidopside A) |
| lipid0361 | 10C | MGDG 18:4;O_16:4;O (18:4;O as fragment; Arabidopside A) |
| lipid0375 | 10D | MGDG 18:4;O_18:4;O (Arabidopside B)*                    |
| lipid0356 | 10D | PG 18:4;O_16:1                                          |

**Oxidized, head group-acylated plastidic lipids containing OPDA**

|           |     |                                                                       |
|-----------|-----|-----------------------------------------------------------------------|
| lipid0603 | 10E | DGDG-O(FA 18:4;O) 36:8;O2                                             |
| lipid0535 | 10E | MGDG-O(FA 18:4;O) 34:8;O2 (Arabidopside E or MGDG-O(FA 18:4;O) 36:6)  |
| lipid0540 | 10F | MGDG-O(FA 18:4;O) 36:8;O2 (Arabidopside G)                            |
| lipid0574 | 10F | MGDG-O(FA 18:4;O) 36:8;O2 (alternative fragmentation; Arabidopside G) |
| lipid0489 | 10G | MGDG-O(FA 16:4;O) 34:8;O2 or MGDG-O(FA 16:4;O) 36:6                   |
| lipid0483 | 10G | MGDG-O(FA 16:0) 36:8;O2                                               |
| lipid0512 | 10H | MGDG-O(FA 18:3) 36:8;O2                                               |
| lipid0518 | 10H | MGDG-O(FA 18:2) 36:8;O2                                               |
| lipid0537 | 10I | MGDG-O(FA 18:4;O) 36:7;O                                              |

|           |     |                                                       |
|-----------|-----|-------------------------------------------------------|
| lipid0548 | 10I | MGDG-O(FA 18:3;O) 36:8;O2                             |
| lipid0556 | 10J | MGDG-O(FA 18:5;O2) 36:6 or MGDG-O(FA 18:5;O2) 34:8;O2 |
| lipid0570 | 10J | MGDG-O(FA 18:3;O2) 36:6 or MGDG-O(FA 18:3;O2) 34:8;O2 |
| lipid0580 | 10K | MGDG-O(FA 18:3;O2) 36:8;O2                            |
| lipid0588 | 10K | MGDG-O(FA 18:4;O3) 36:6 or MGDG-O(FA 18:4;O3) 34:8;O2 |

### **Sterol esters**

|           |     |                     |
|-----------|-----|---------------------|
| lipid0287 | 10L | Campesterol 18:3**  |
| lipid0819 | 10L | Campesterol 18:2**  |
| lipid0289 | 10M | Sitosterol 18:3*    |
| lipid0821 | 10M | Sitosterol 18:2*    |
| lipid0827 | 10N | Sitosterol 18:4;O** |
| lipid0288 | 10N | Stigmasterol 18:3** |
| lipid0820 | 10O | Stigmasterol 18:2** |

### **Miscellaneous lipids**

|           |     |                           |
|-----------|-----|---------------------------|
| lipid0162 | 10P | DGDG 34:5                 |
| lipid0173 | 10P | DGDG 38:6 or DGDG 36:8;O2 |
| lipid0043 | 10Q | PC 38:5                   |
| lipid0063 | 10Q | PE 34:2                   |
| lipid0072 | 10R | PE 38:5                   |
| lipid0073 | 10R | PE 38:4                   |
| lipid0076 | 10S | PE 40:2                   |
| lipid0079 | 10S | PE 42:2                   |
| lipid0800 | 10T | LPA 18:3                  |
| lipid0276 | 10T | TG 18:3_34:2*             |

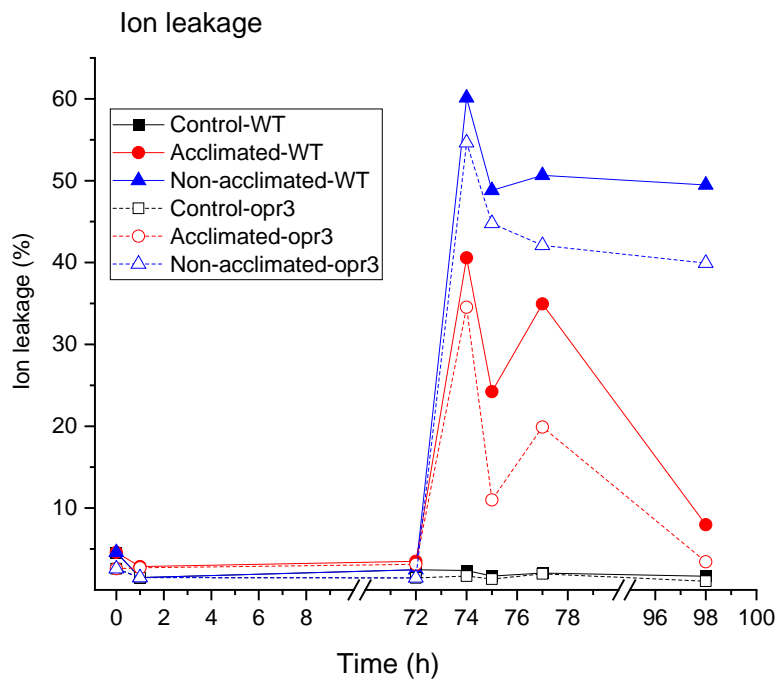

## Oxidized, diacyl plastidic lipids containing OPDA

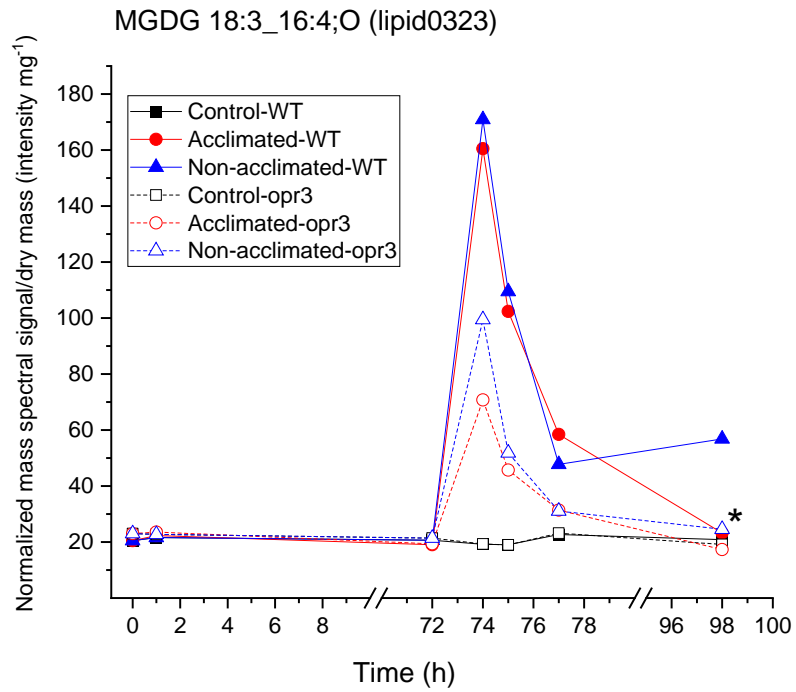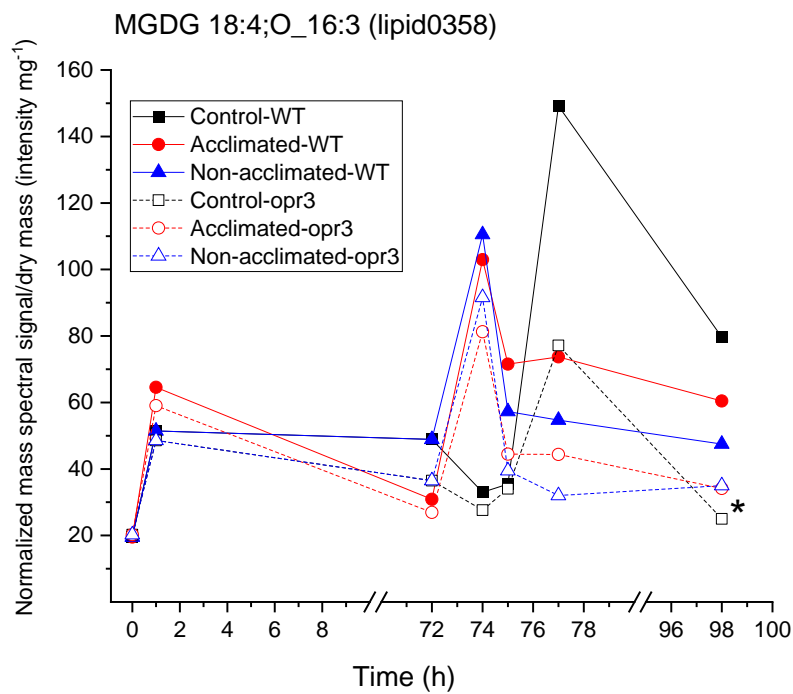

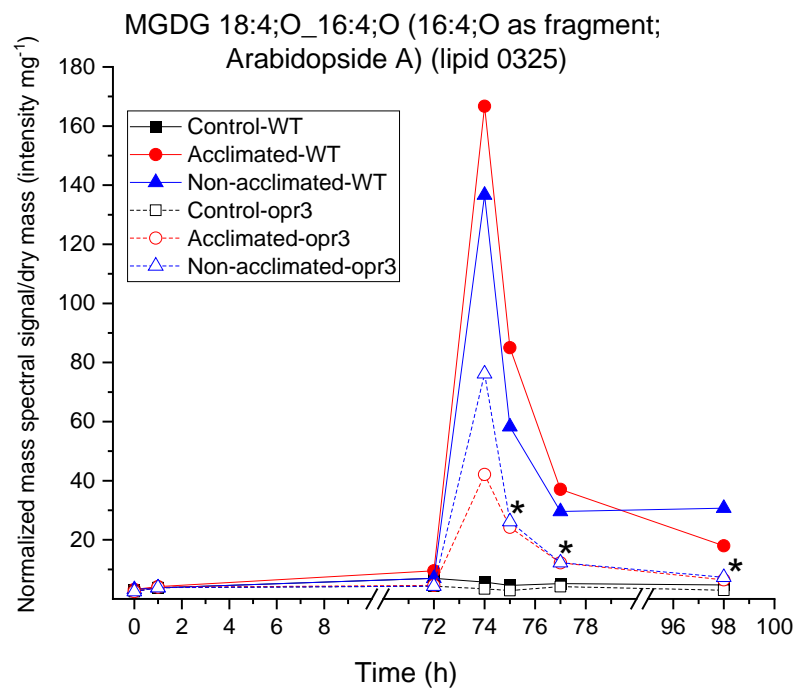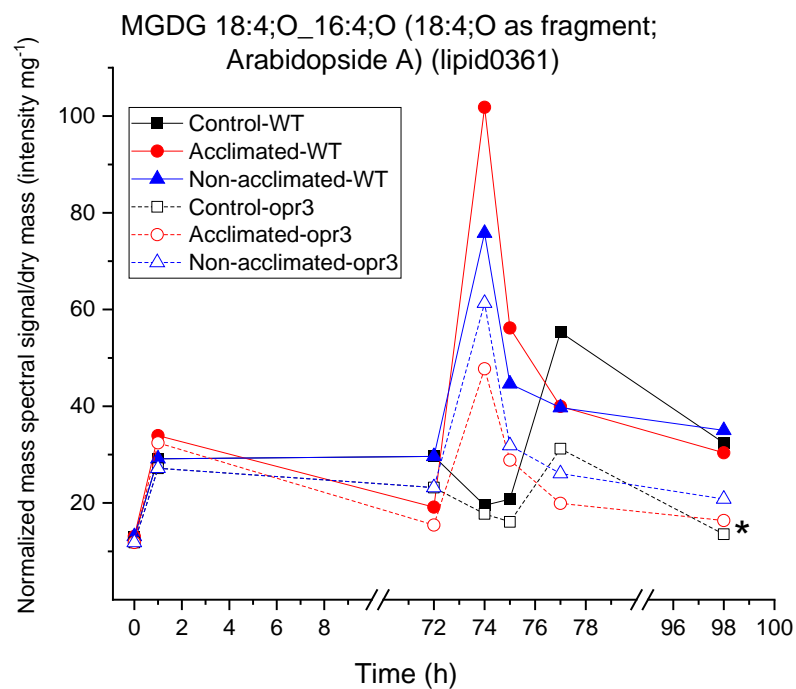



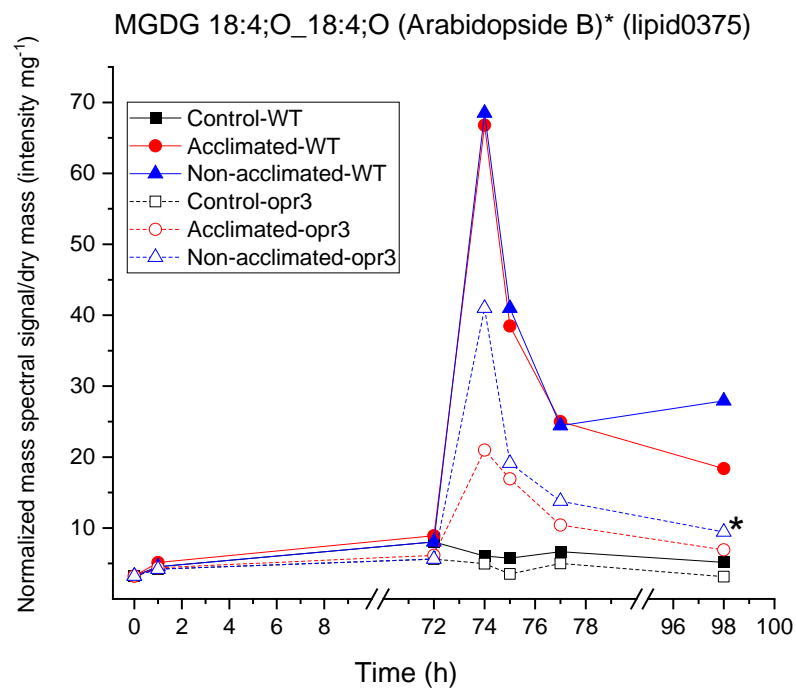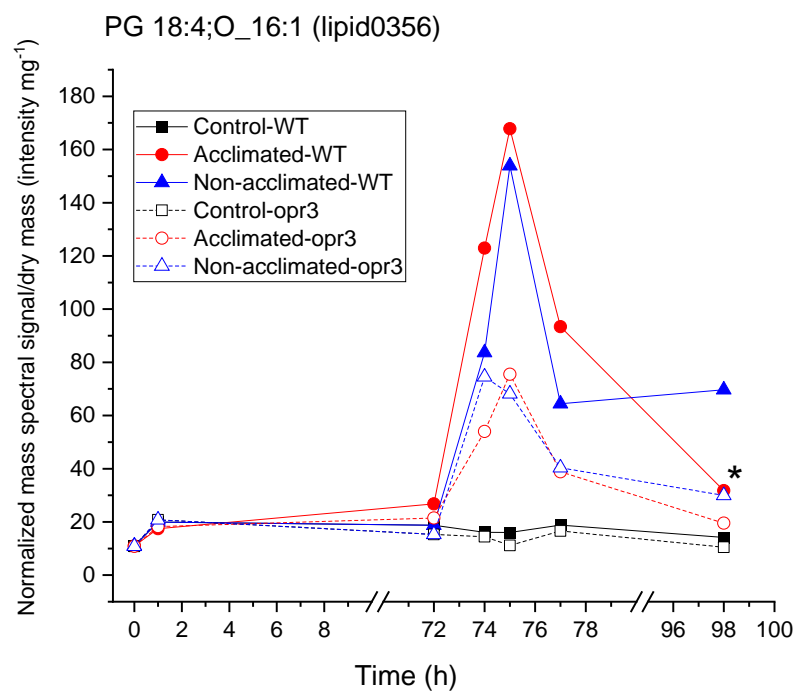

## Oxidized, head group-acylated plastidic lipids containing OPDA

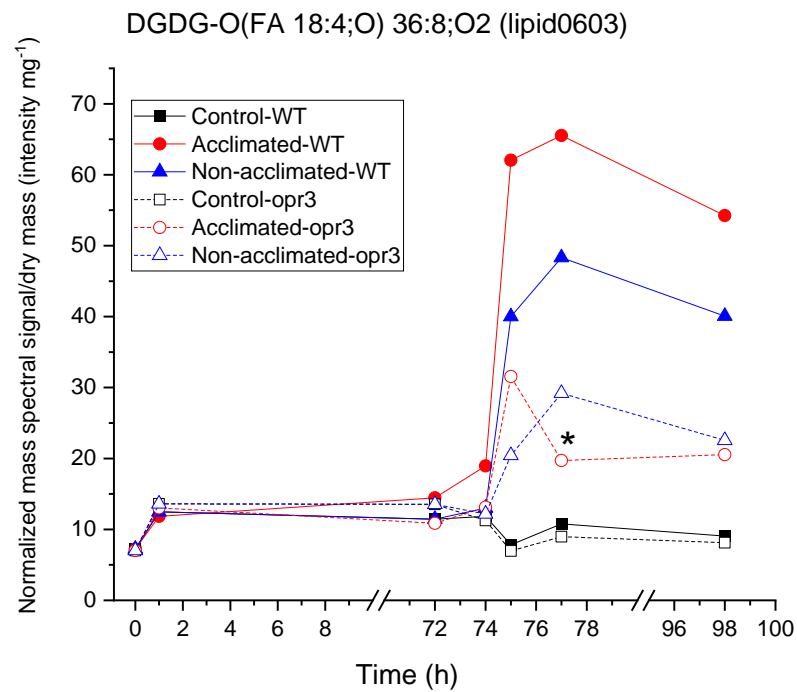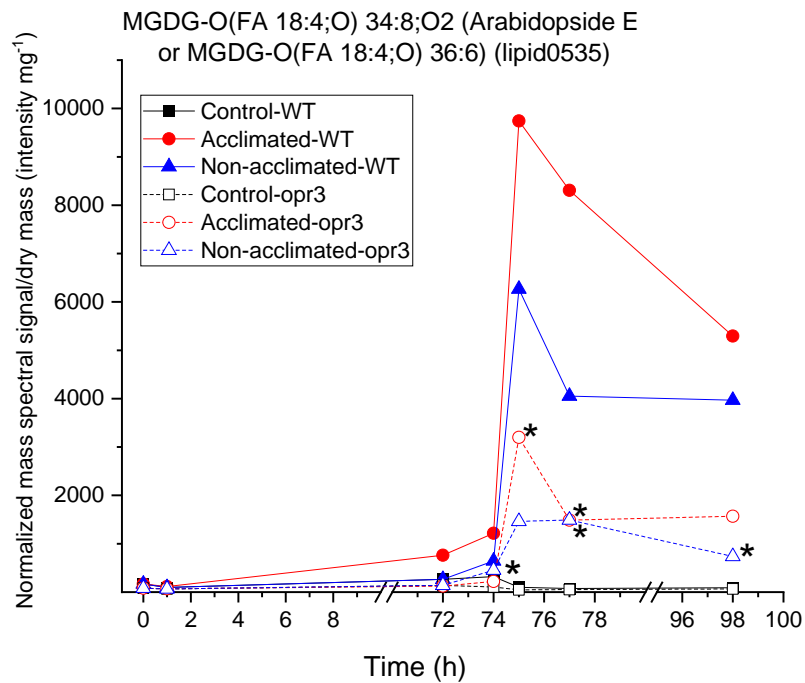

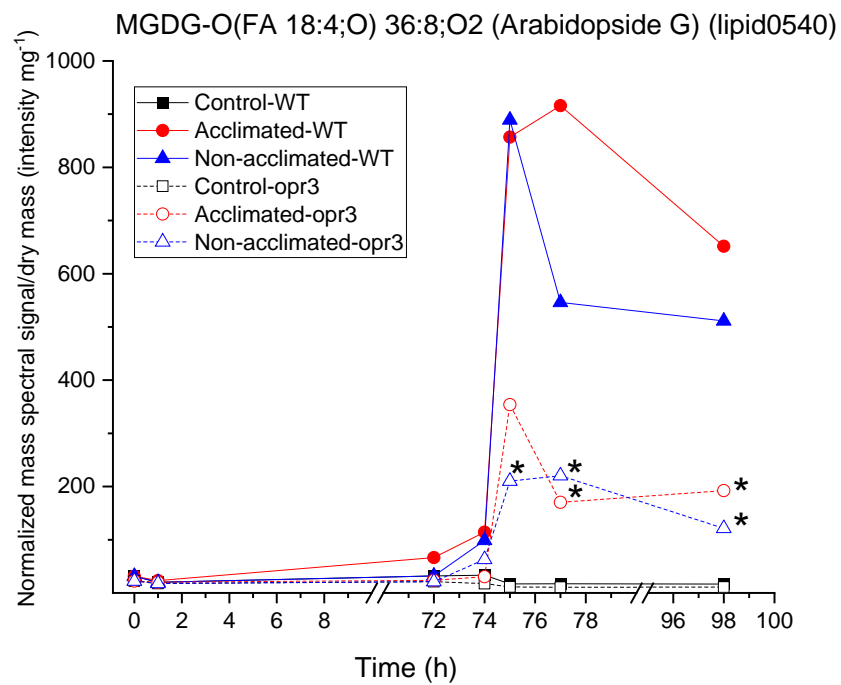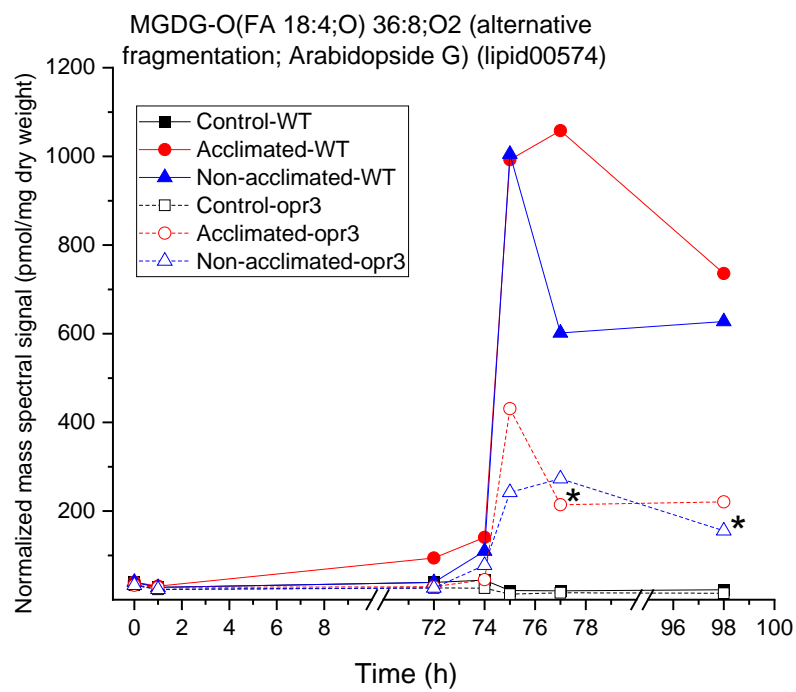

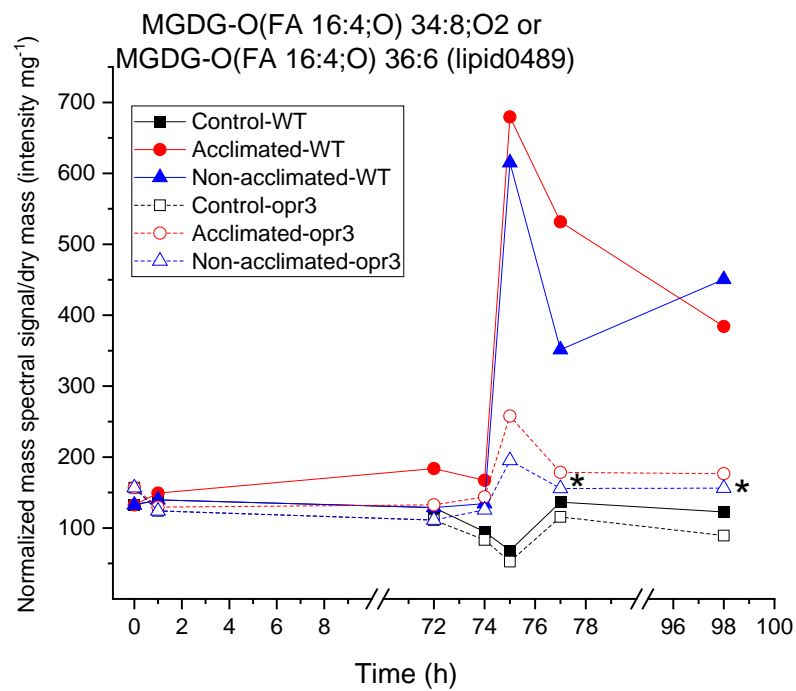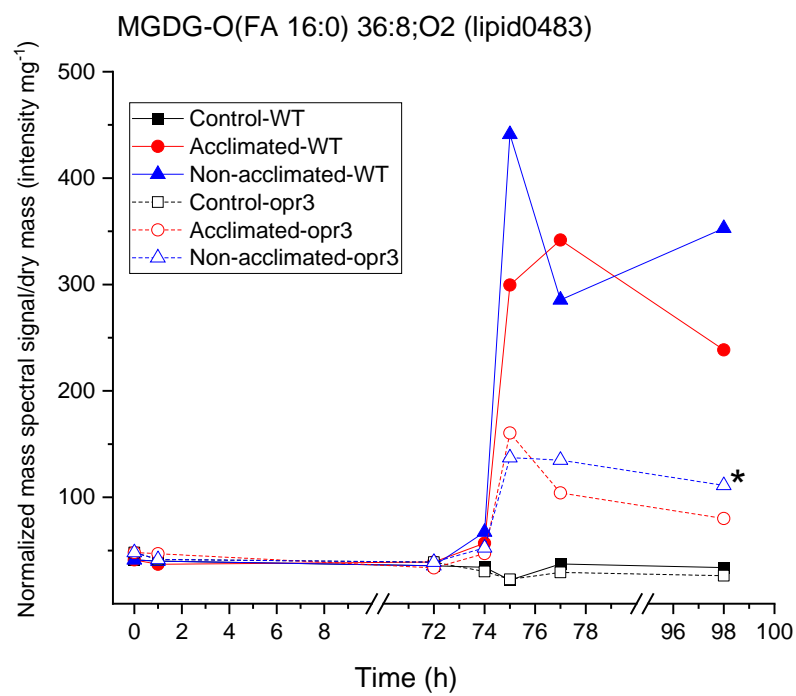

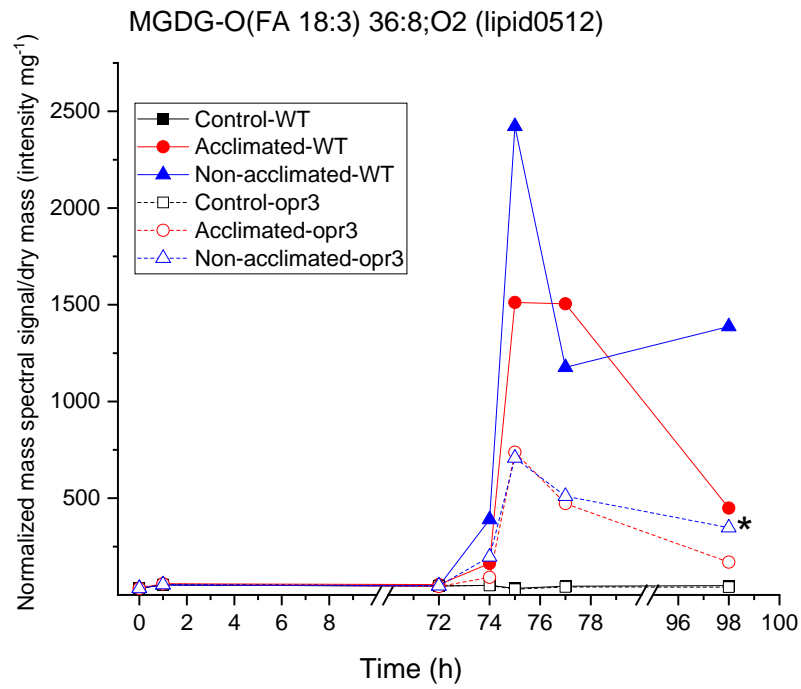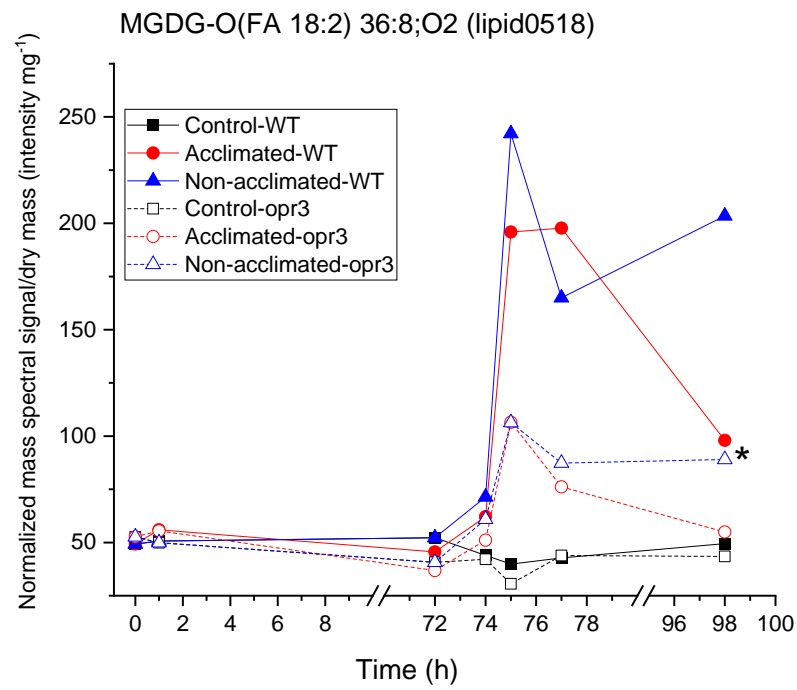

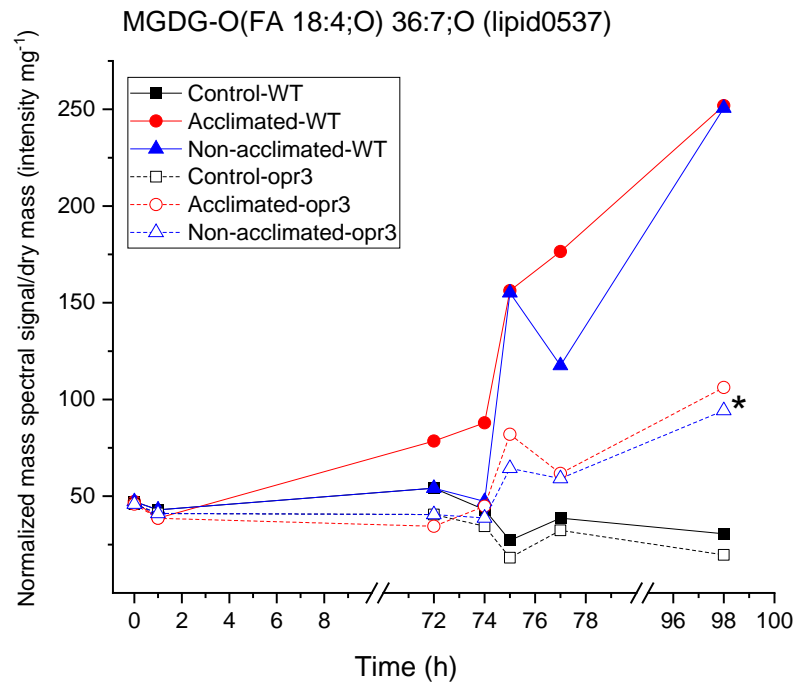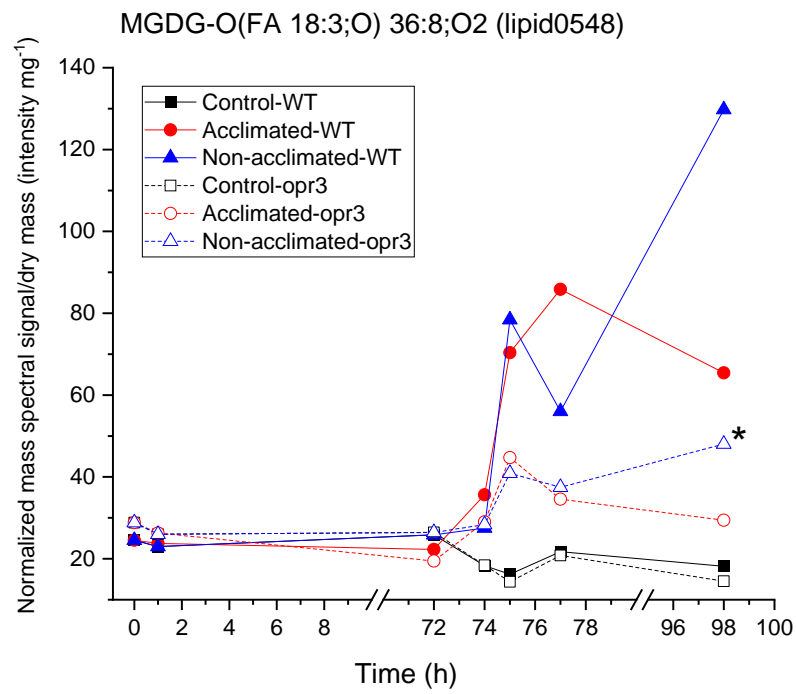

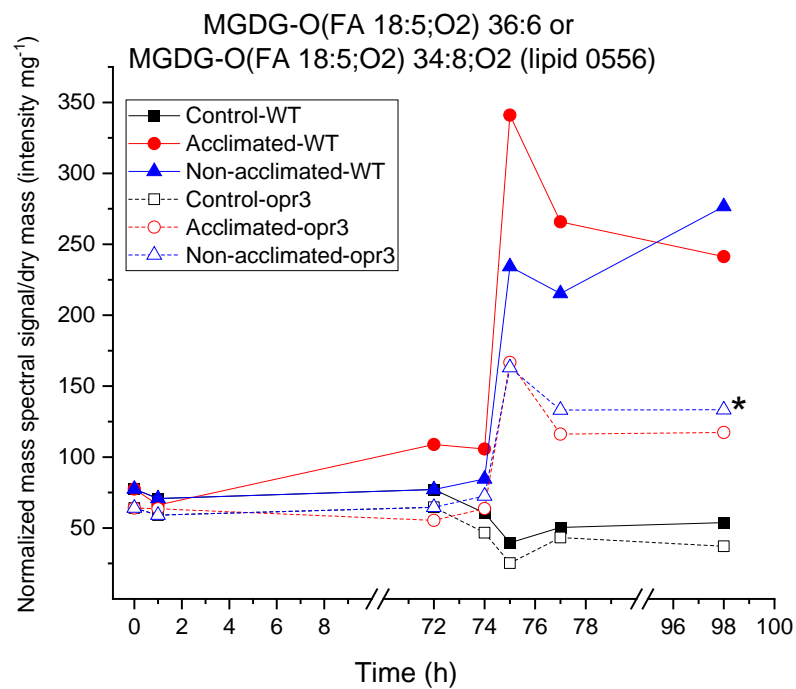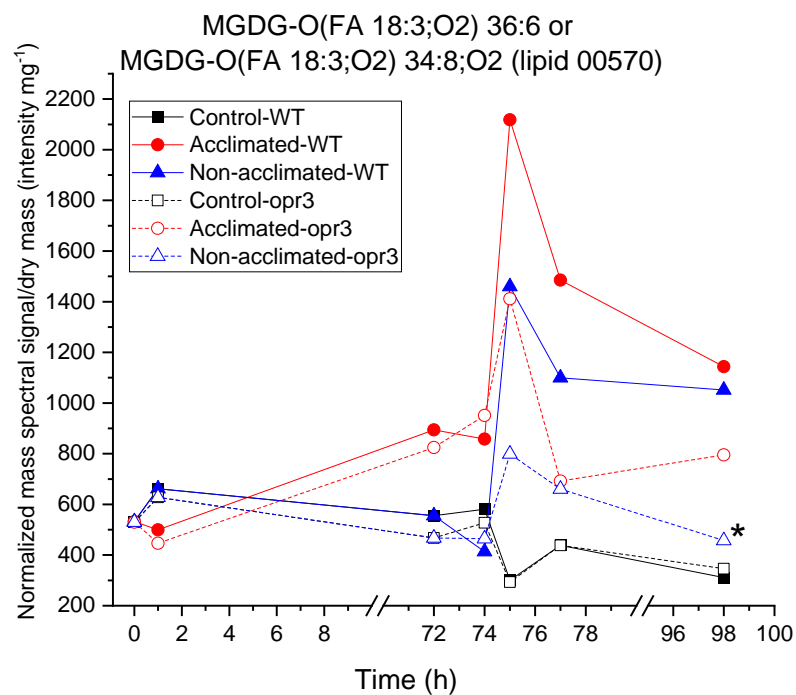

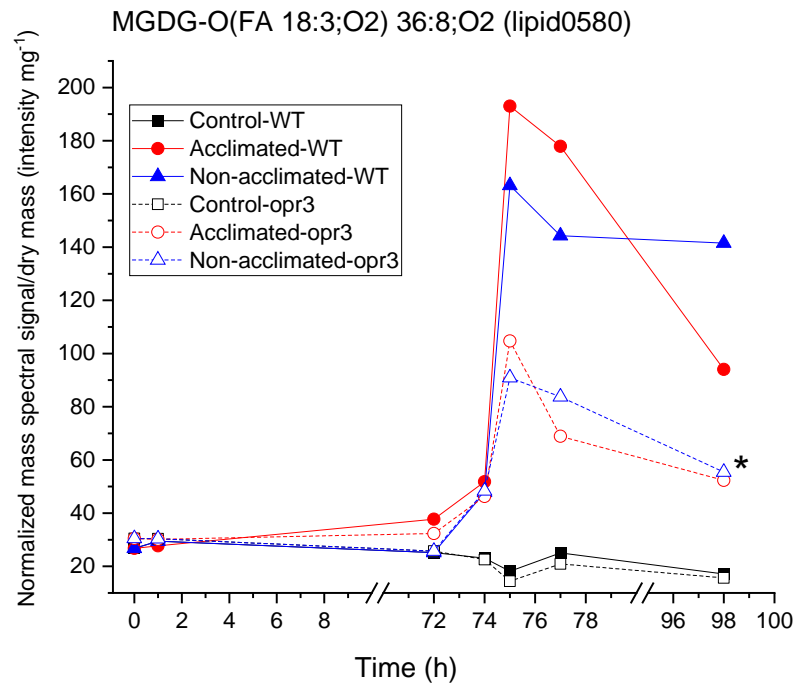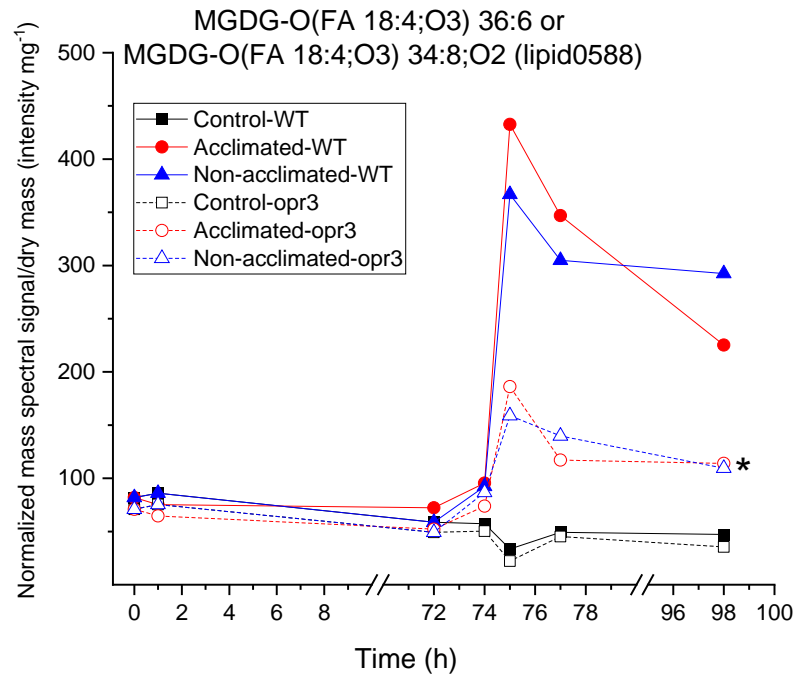



## Sterol esters

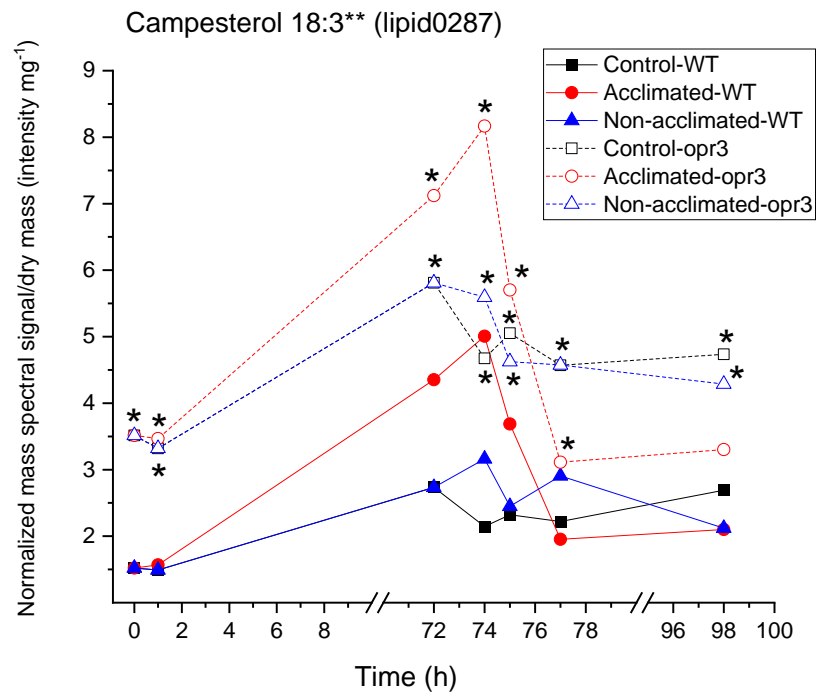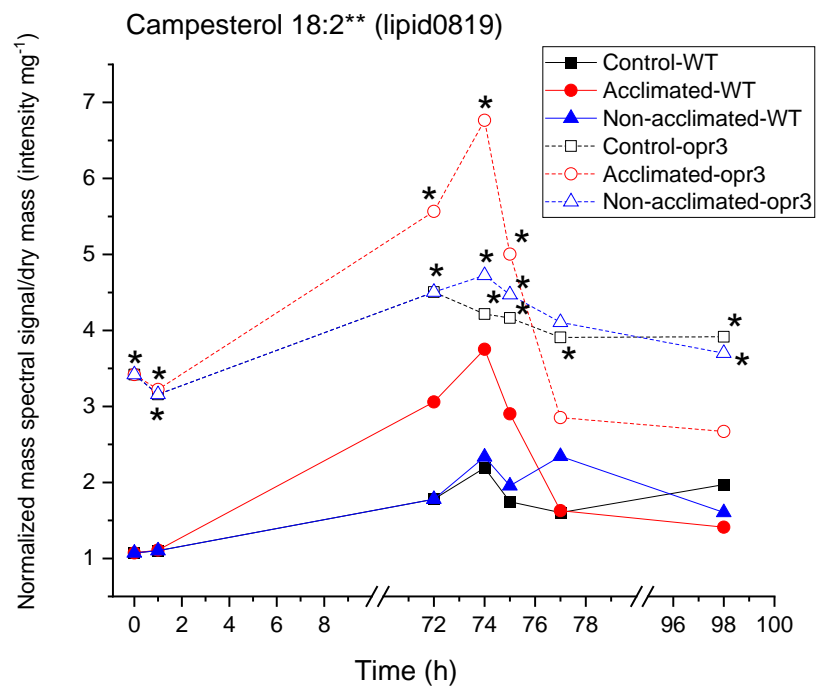

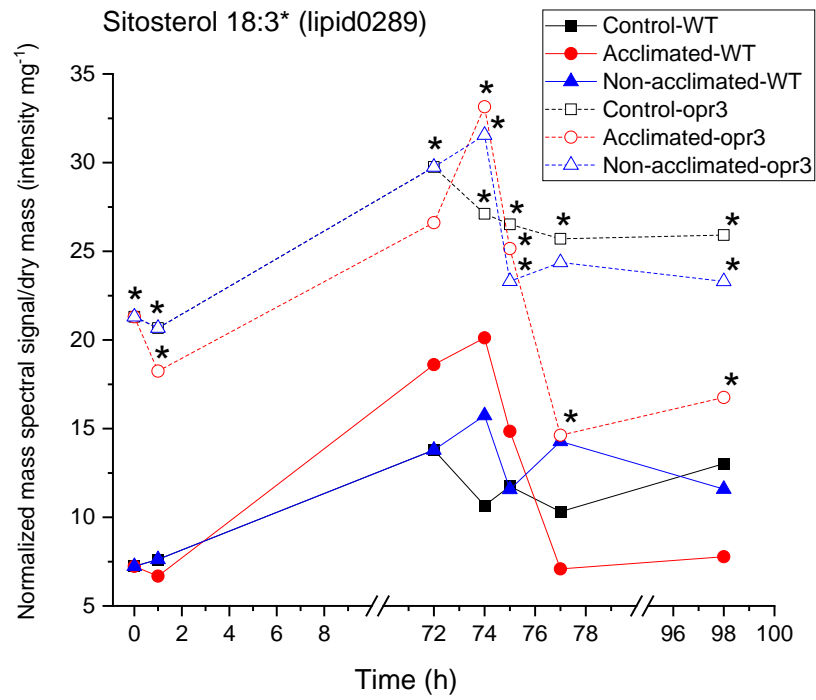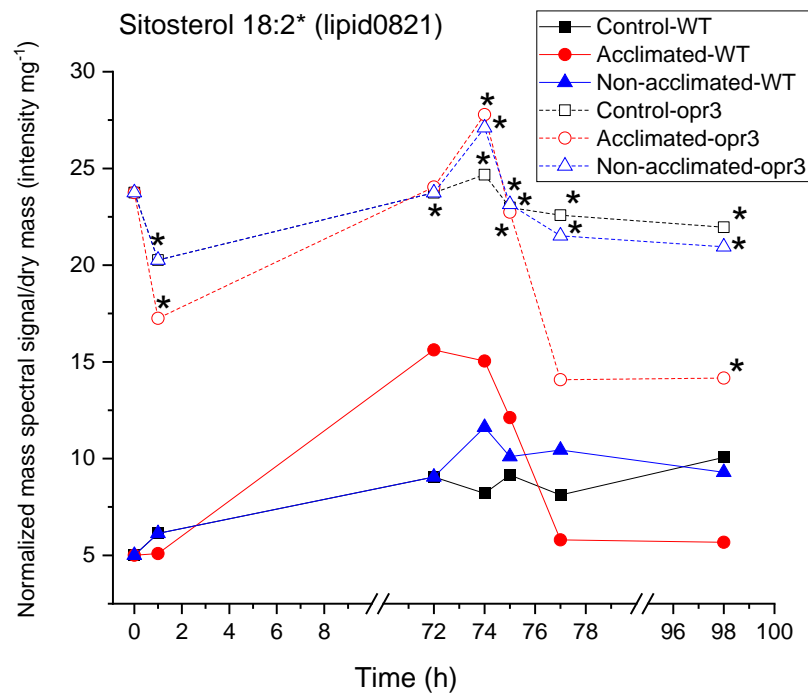

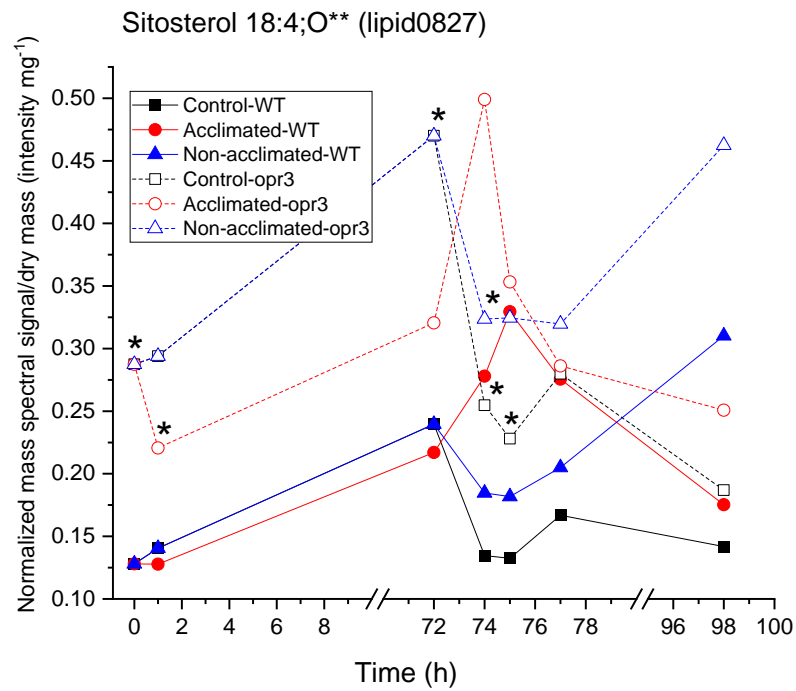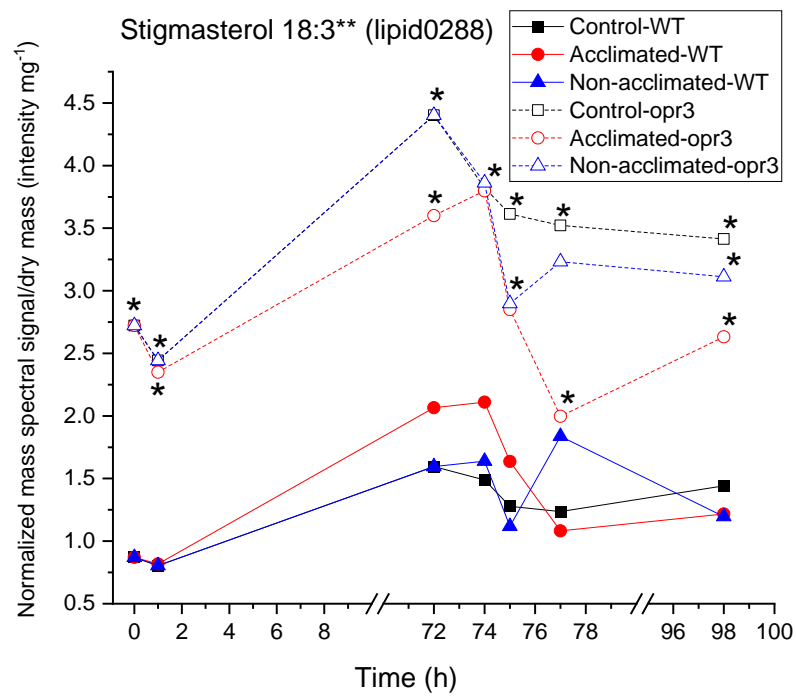

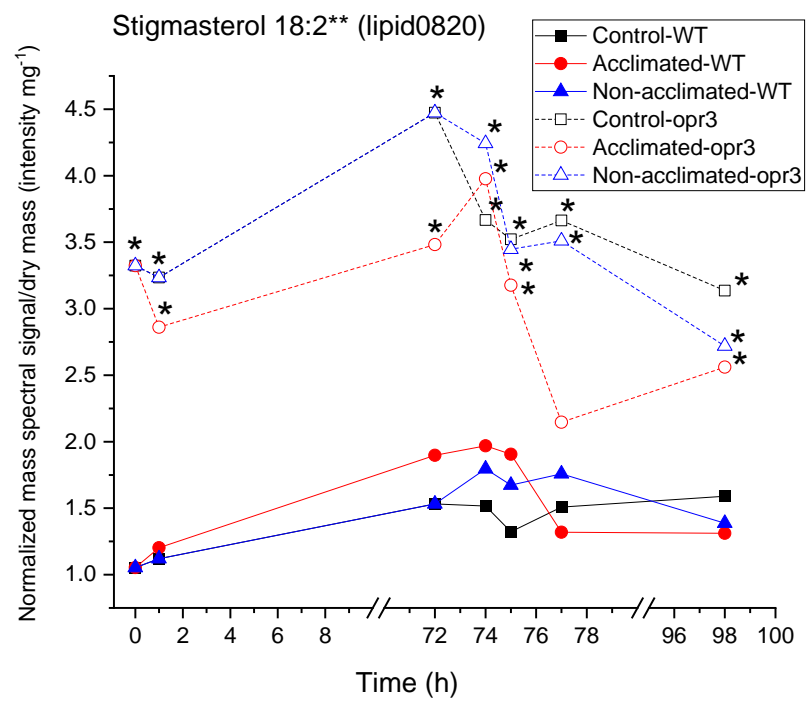

## Miscellaneous lipids

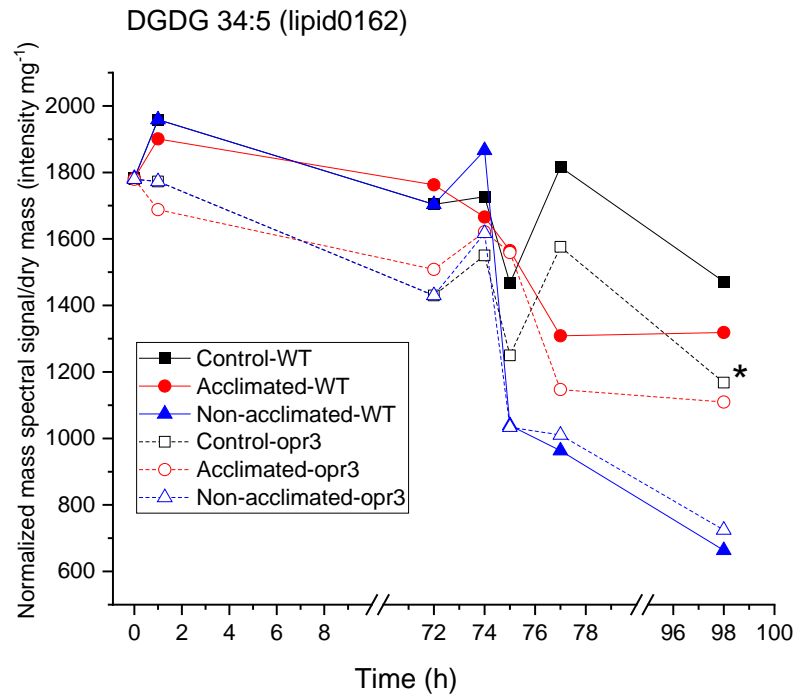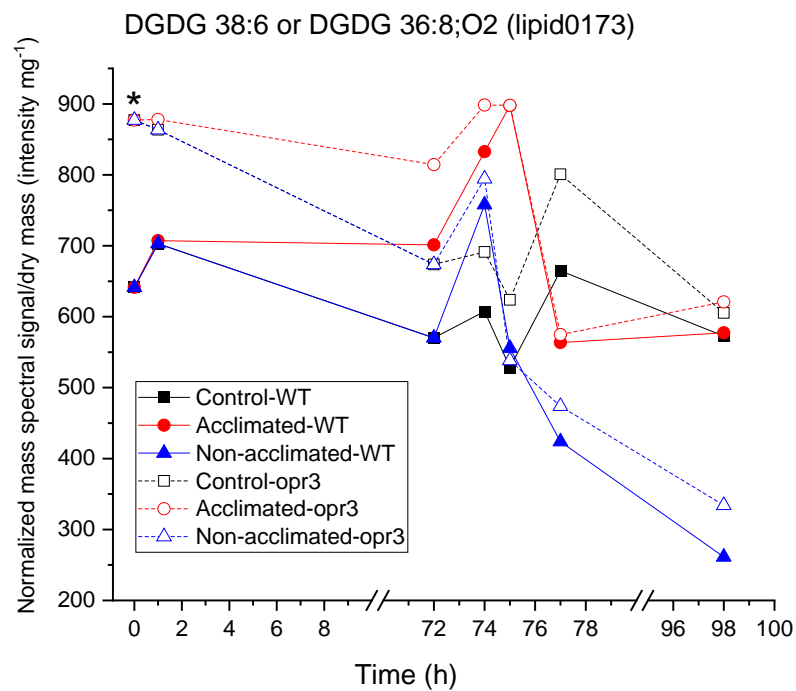

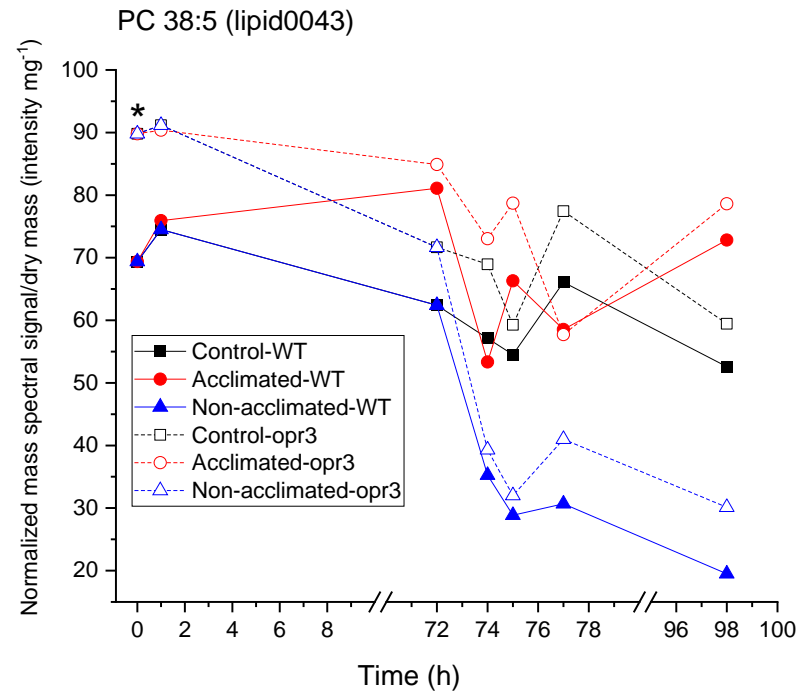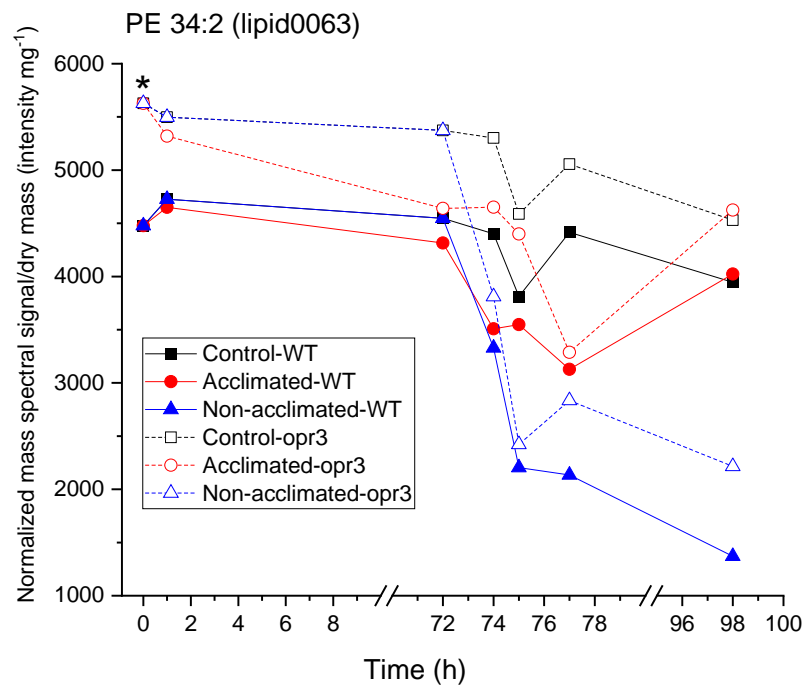

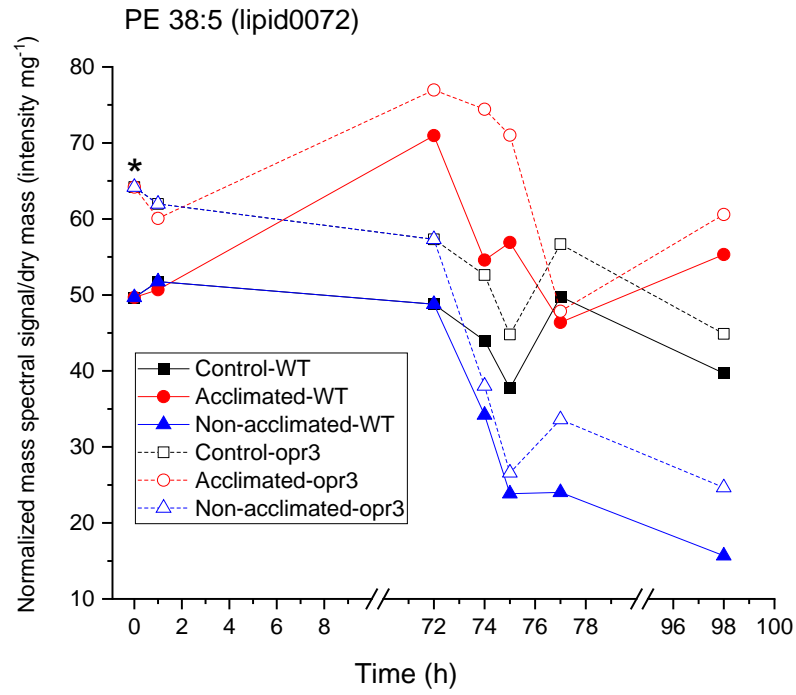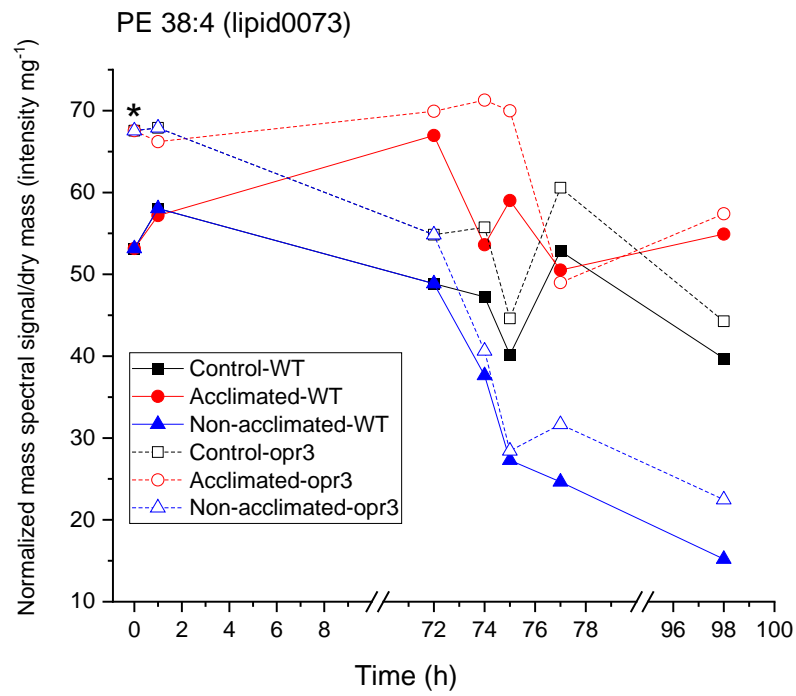

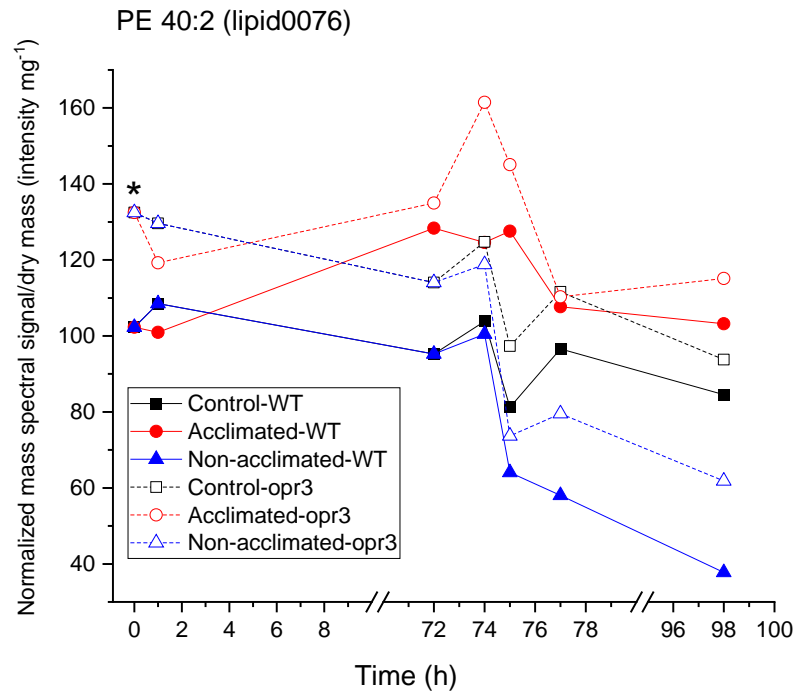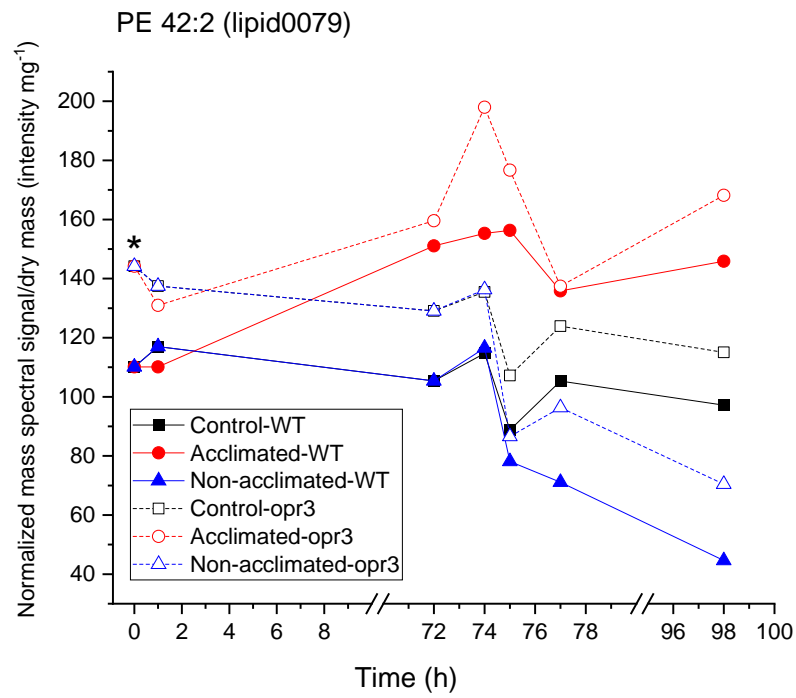



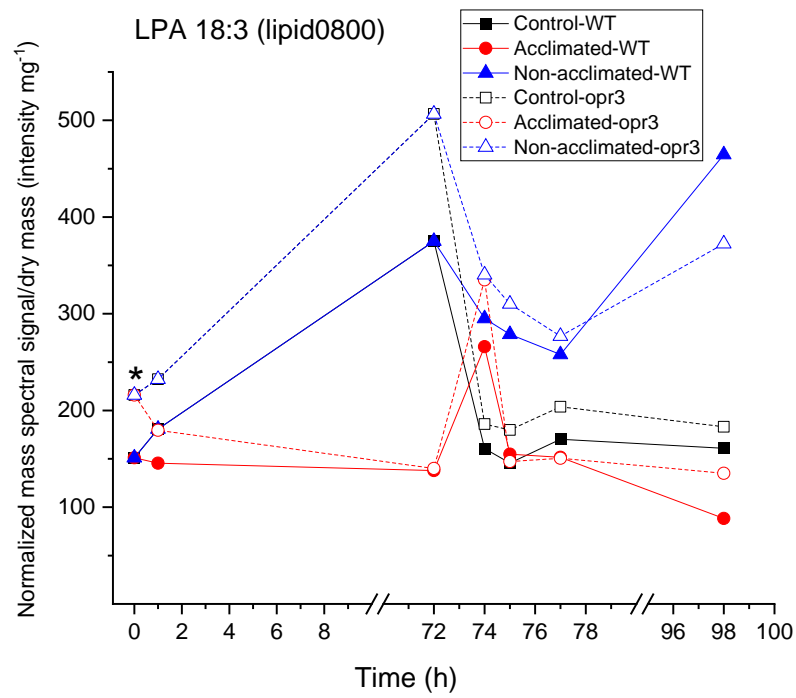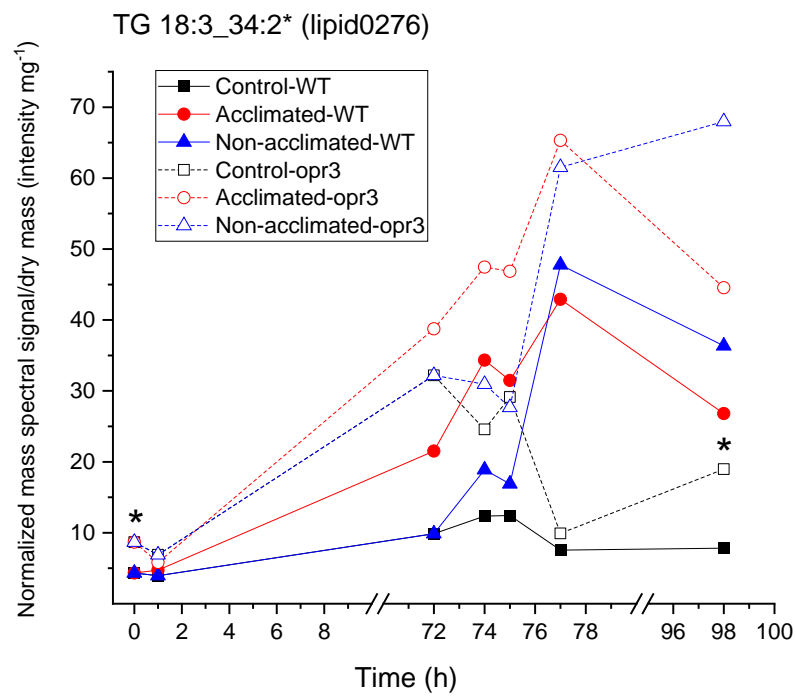

Figure S11. Positions of seeds/plants in trays. (A) Schematic numbering of wells within a 72-well plug tray. (B), (C), and (D) Positions of letter-coded seeds for all trays of rounds 1, 2, and 3, respectively.

A.

|    |    |    |    |    |    |    |    |    |    |    |    |
|----|----|----|----|----|----|----|----|----|----|----|----|
| 1  | 2  | 3  | 4  | 5  | 6  | 7  | 8  | 9  | 10 | 11 | 12 |
| 13 | 14 | 15 | 16 | 17 | 18 | 19 | 20 | 21 | 22 | 23 | 24 |
| 25 | 26 | 27 | 28 | 29 | 30 | 31 | 32 | 33 | 34 | 35 | 36 |
| 37 | 38 | 39 | 40 | 41 | 42 | 43 | 44 | 45 | 46 | 47 | 48 |
| 49 | 50 | 51 | 52 | 53 | 54 | 55 | 56 | 57 | 58 | 59 | 60 |
| 61 | 62 | 63 | 64 | 65 | 66 | 67 | 68 | 69 | 70 | 71 | 72 |

B.

|   |   |   |   |   |   |   |   |   |   |   |   |
|---|---|---|---|---|---|---|---|---|---|---|---|
| H | V | K | G | I | T | Q | C | A | W | X | P |
| W | P | H | O | J | P | U | L | O | M | A | D |
| V | J | F | M | C | S | V | C | I | I | S | T |
| N | H | G | B | B | K | N | E | E | R | T | X |
| U | Q | R | X | W | A | K | L | G | D | F | Q |
| J | D | U | S | O | R | L | E | N | F | M | B |

C.

|   |   |   |   |   |   |   |   |   |   |   |   |
|---|---|---|---|---|---|---|---|---|---|---|---|
| P | L | E | U | X | Q | G | A | B | O | N | V |
| H | M | B | N | D | G | L | F | I | J | B | A |
| K | U | Q | F | T | W | T | I | P | V | X | L |
| Q | C | G | D | K | V | W | X | N | H | R | E |
| R | O | A | U | M | S | O | E | C | P | S | J |
| I | H | J | D | S | R | K | F | C | T | M | W |

D.

|   |   |   |   |   |   |   |   |   |   |   |   |
|---|---|---|---|---|---|---|---|---|---|---|---|
| M | Q | I | X | A | G | J | E | D | U | T | B |
| H | O | B | I | U | V | J | T | C | E | J | V |
| L | K | B | A | A | I | Q | E | D | M | O | P |
| F | X | L | R | X | W | N | N | M | F | S | C |
| W | U | G | G | R | P | H | T | S | K | Q | D |
| N | F | S | W | C | R | K | V | P | L | H | O |

Figure S12. Numbering on tray F1.01. Each plant is referred to by a label including the tray label, e.g., “F1.01”, and the well position from 1 to 72. For example, the plants shown in this figure are F1.01.01 to F1.01.72, indicating F (for Freezing)Block.Tray.Position.

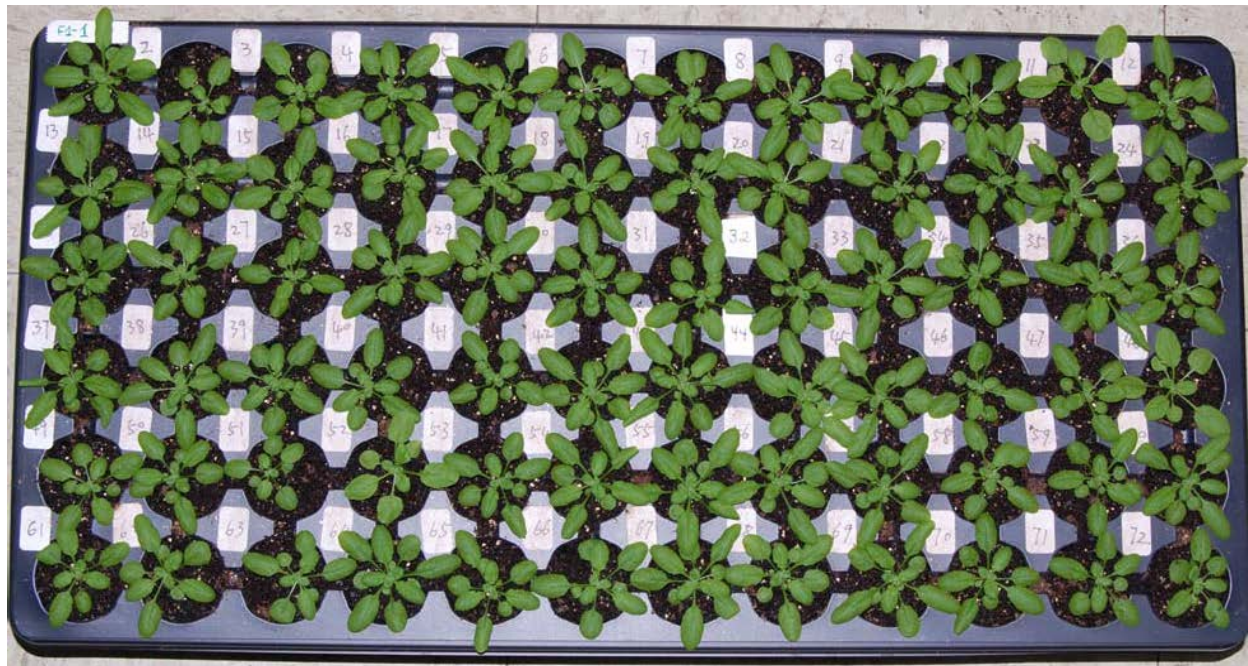

Supplement: s1 [file s1]
