# Supplementary material for: Specific Changes in Arabidopsis thaliana Rosette Lipids during Freezing Can Be Associated with Freezing Tolerance
Source: Metabolites. 2022 Apr 23;12(5):385. doi: 10.3390/metabo12050385 (PMC9145600; doi:10.3390/metabo12050385)
Supplement: Supplementary file 1 [file metabolites-12-00385-s001.zip › Supplemental Tables-Vu et al-4-5-22.xlsx]

## Sheet: Table S1
Table S1. Rosette lipid amounts from the freezing time course of wild-type plants. Experimental treatment protocol is shown in Figure 1. Lipid levels are reported as normalized mass spectral signal, as described by Vu et al. [14], and a value of 1 represents a signal equal to 1 pmol of internal standard per dry mass of rosette tissue (mg). Also indicated are those lipids included in the subset of…
											DGDG-O(FA 18:4;O) 34:6	DGDG-O(FA 18:4;O) 34:7;O	DGDG-O(FA 18:4;O) 36:6 or DGDG-O(FA 18:4;O) 34:8;O2	DGDG-O(FA 18:4;O) 36:8;O2	MGDG-O(FA 16:0) 34:6	MGDG-O(FA 16:0) 34:7;O	MGDG-O(FA 16:0) 36:6 or MGDG-O(FA 16:0) 34:8;O2	MGDG-O(FA 16:0) 36:8;O2	MGDG-O(FA 16:1) 34:6	MGDG-O(FA 16:1) 36:6 or MGDG-O(FA 16:1) 34:8;O2	MGDG-O(FA 16:2) 34:6	MGDG-O(FA 16:2) 36:6 or MGDG-O(FA 16:2) 34:8;O2	MGDG-O(FA 16:3) 34:6	MGDG-O(FA 16:3) 36:6 or MGDG-O(FA 16:3) 34:8;O2	MGDG-O(FA 16:3;O2) 34:6 or MGDG-O(FA 18:1) 34:6	MGDG-O(FA 16:3;O2) 36:6 or MGDG-O(FA 16:3;O2) 34:8;O2 or MGDG-O(FA 18:1) 36:6 or MGDG-O(FA 18:1) 34:8;O2	MGDG-O(FA 16:3;O2) 36:8;O2 or MGDG-O(FA 18:1) 36:8;O2	MGDG-O(FA 16:3;O) 34:6	MGDG-O(FA 16:3;O) 34:8;O2 or MGDG-O(FA 16:3;O) 36:6	MGDG-O(FA 16:3;O) 36:8;O2	MGDG-O(FA 16:4;O) 34:7;O	MGDG-O(FA 16:4;O) 34:8;O2 or MGDG-O(FA 16:4;O) 36:6	MGDG-O(FA 16:4;O) 36:8;O2	MGDG-O(FA 18:0) 34:6	MGDG-O(FA 18:0) 34:7;O	MGDG-O(FA 18:0) 34:8;O2 or MGDG-O(FA 18:0) 36:6	MGDG-O(FA 18:2) 34:6	MGDG-O(FA 18:2) 34:7;O	MGDG-O(FA 18:2) 36:6 or MGDG-O(FA 18:2) 34:8;O2	MGDG-O(FA 18:2) 36:8;O2	MGDG-O(FA 18:2;O2) 36:6 or MGDG-O(FA 18:2;O2) 34:8;O2	MGDG-O(FA 18:2;O3) 36:6 or MGDG-O(FA 18:2;O3) 34:8;O2	MGDG-O(FA 18:2;O) 36:6 or MGDG-O(FA 18:2;O) 34:8;O2	MGDG-O(FA 18:2;O) 36:8;O2	MGDG-O(FA 18:3) 34:6	MGDG-O(FA 18:3) 34:7;O2 or MGDG-O(FA 18:3) 36:5	MGDG-O(FA 18:3) 34:7;O	MGDG-O(FA 18:3) 36:6 or MGDG-O(FA 18:3) 34:8;O2	MGDG-O(FA 18:3) 36:7;O
													inc. in subset of 244 lipids	inc. in subset of 244 lipids	inc. in subset of 244 lipids	inc. in subset of 244 lipids	inc. in subset of 244 lipids	inc. in subset of 244 lipids	inc. in subset of 244 lipids	inc. in subset of 244 lipids	inc. in subset of 244 lipids	inc. in subset of 244 lipids	inc. in subset of 244 lipids	inc. in subset of 244 lipids	inc. in subset of 244 lipids	inc. in subset of 244 lipids	inc. in subset of 244 lipids	inc. in subset of 244 lipids	inc. in subset of 244 lipids	inc. in subset of 244 lipids	inc. in subset of 244 lipids	inc. in subset of 244 lipids	inc. in subset of 244 lipids	inc. in subset of 244 lipids	inc. in subset of 244 lipids	inc. in subset of 244 lipids	inc. in subset of 244 lipids	inc. in subset of 244 lipids	inc. in subset of 244 lipids	inc. in subset of 244 lipids		inc. in subset of 244 lipids	inc. in subset of 244 lipids	inc. in subset of 244 lipids	inc. in subset of 244 lipids	inc. in subset of 244 lipids	inc. in subset of 244 lipids	inc. in subset of 244 lipids	inc. in subset of 244 lipids
Sample name	Block	Tray	Plant position	Genotype letter	Genotype name	Time (h)	Vol analyzed (uL) (contains 0.04 mg DW)	Comments on samples flagged for having analytical problems	Dry weight (g)	Ion leakage (%)	lipid0599	lipid0600	lipid0601	lipid0603	lipid0473	lipid0474	lipid0476	lipid0483	lipid0464	lipid0468	lipid0459	lipid0461	lipid0448	lipid0454	lipid0519	lipid0522	lipid0525	lipid0496	lipid0498	lipid0500	lipid0487	lipid0489	lipid0495	lipid0526	lipid0527	lipid0528	lipid0514	lipid0515	lipid0516	lipid0518	lipid0583	lipid0596	lipid0551	lipid0553	lipid0501	lipid0506	lipid0503	lipid0505	lipid0508
F1.01.09	1	1	9	A	WT	0	98		0.006502	2.29994	14.2675	11.5844	20.3516	5.3933	29.524	37.3421	103.094	36.0134	43.5963	72.8871	25.8594	225.044	29.3394	49.0405	33.5234	109.726	24.1657	41.841	48.0064	21.9718	29.7822	47.2778	15.2112	25.9342	30.8738	45.6697	20.3594	26.5397	63.1623	27.3801	421.325	68.759	180.045	54.5744	21.5853	52.2029	14.1532	33.0785	26.264
F1.01.23	1	1	23	A	WT	0	100		0.006414	2.04227	13.1055	10.3735	30.9508	9.30614	29.2988	39.853	177.138	53.0647	50.2054	74.0831	28.6005	239.122	37.0853	57.2647	30.4097	122.477	24.3912	36.074	56.9753	25.6959	27.3405	95.106	15.6989	29.2503	24.0433	46.8286	16.1046	23.7551	81.7106	35.3786	807.626	116.273	184.721	63.4033	37.9435	74.2552	16.1015	67.9478	29.0197
F1.01.54	1	1	54	A	WT	0	113		0.005668	4.17841	12.9858	9.88093	28.8191	9.42094	35.0143	38.8015	95.9115	48.141	61.1478	70.1366	27.6931	181.668	30.4033	59.859	33.7694	125.452	24.7578	35.6336	32.766	21.4829	33.4625	65.7809	26.0288	29.9469	30.8999	40.4799	23.0439	28.7898	71.208	56.7449	629.79	98.3011	237.386	71.21	32.5576	64.3929	20.9519	59.5923	34.6015
F1.02.09	1	2	9	A	WT	1	135	removed data	0.004742	3.04397	NA	NA	NA	NA	NA	NA	NA	NA	NA	NA	NA	NA	NA	NA	NA	NA	NA	NA	NA	NA	NA	NA	NA	NA	NA	NA	NA	NA	NA	NA	NA	NA	NA	NA	NA	NA	NA	NA	NA
F1.02.23	1	2	23	A	WT	1	142		0.004522	0.757193	15.3344	13.9578	34.0487	11.6628	41.612	62.0206	116.312	49.2304	71.2706	87.871	40.0002	260.223	36.5101	85.6858	32.6015	144.212	30.4357	36.0612	55.1739	34.0968	44.0854	116.731	23.256	29.8073	37.9294	47.9328	24.5982	37.153	84.6145	42.1877	544.322	114.953	166.34	70.5965	41.3554	101.797	31.4194	69.6671	46.9755
F1.02.54	1	2	54	A	WT	1	114		0.005612	0.563431	14.1132	14.3808	27.6936	12.7151	40.9073	50.4755	65.4464	48.4269	61.2727	74.8819	33.1061	227.56	33.7864	75.7851	37.5856	133.741	44.7881	29.6175	55.1698	36.4557	30.21	90.399	22.9516	26.2364	35.2287	40.6505	21.9121	32.9465	66.3108	48.7398	1099.32	133.576	203.36	52.2143	31.4232	72.327	24.5145	47.8321	24.7022
F1.03.09	1	3	9	A	WT	1	84		0.00759	4.1784	12.7255	10.4872	20.4499	5.94241	31.7947	37.6334	54.603	23.2012	44.4007	52.1186	33.9853	266.593	25.6279	52.1873	44.2485	113.186	27.2402	30.1789	41.571	24.4457	28.149	99.6361	17.2065	20.0327	32.0322	27.4806	20.0492	19.4002	66.657	35.3907	720.115	94.8953	128.026	37.6819	28.9053	85.954	19.1278	47.1493	16.3689
F1.03.23	1	3	23	A	WT	1	139		0.00462	2.64388	18.4202	18.0274	40.619	11.729	52.7266	55.3693	81.7259	40.1466	75.3056	73.048	45.3409	292.858	46.1984	75.887	50.5506	113.65	38.8872	44.5064	59.0518	41.6331	45.7474	236.636	30.7079	32.2296	41.9105	51.8511	30.5707	37.9364	120.637	55.6887	524.34	137.822	142.425	56.6953	54.6813	138.254	43.3245	81.8346	34.06
F1.03.54	1	3	54	A	WT	1	59		0.010932	1.75926	10.4613	9.55769	19.5559	6.14605	32.5804	32.3938	51.7851	20.8036	39.5613	46.5332	30.4724	271.169	27.9667	49.8879	34.0209	93.475	25.6284	23.2978	34.8214	22.9473	25.6511	92.3353	16.1987	20.0582	21.2149	29.798	17.754	22.0499	82.3367	29.256	714.764	80.737	122.859	32.6214	35.0907	79.8856	13.8431	45.0023	22.0459
F1.04.09	1	4	9	A	WT	72	52		0.01226	0.749646	6.53151	9.265	17.3713	4.57937	30.4715	36.7802	43.3592	19.2185	28.5169	33.7951	24.6727	217.025	27.4943	50.0294	27.529	123.576	15.5003	15.9482	26.7844	10.1195	19.352	81.4295	10.9617	16.2415	22.6672	23.3686	15.4227	20.6926	55.5111	28.2828	1310.1	100.308	111.478	27.8344	35.1889	83.9252	16.9193	48.0676	19.9531
F1.04.23	1	4	23	A	WT	72	40		0.015808	0.848168	7.20541	8.42231	16.4408	4.52693	32.7877	37.4492	51.4715	28.1084	25.2686	40.6174	22.2537	197.847	27.8941	54.1088	23.73	140.853	12.023	14.8018	24.9701	13.7254	20.1338	115.306	13.3087	18.756	17.9114	30.2124	15.1349	21.0053	75.579	45.465	1905.7	130.999	115.571	25.4965	33.9603	97.2839	24.0638	61.073	21.8375
F1.04.54	1	4	54	A	WT	72	58		0.011118	1.38169	12.4299	13.2474	20.5591	5.73652	29.3804	43.439	44.2001	14.8308	35.8146	53.1658	24.2094	202.261	31.6979	48.0249	26.5232	135.275	20.9364	23.0345	38.3381	17.5726	23.1816	47.5921	17.6889	19.3287	22.4848	30.5609	13.0411	29.5638	62.9844	21.9693	593.757	90.8461	115.181	26.136	27.6437	80.8115	17.4839	38.8892	27.3618
F1.05.09	1	5	9	A	WT	72	40		0.015864	1.96741	15.2797	15.3059	30.0649	8.34426	43.2028	62.3299	50.1075	39.6832	59.7606	74.635	58.1764	606.783	29.0023	84.4542	75.0756	333.481	46.9548	53.9304	57.8998	29.1378	47.2867	145.174	29.2879	30.2615	38.1587	40.0787	28.3066	39.8001	122.011	35.6	899.503	142.788	125.206	36.9664	58.0849	125.735	34.0305	175.645	37.5883
F1.05.23	1	5	23	A	WT	72	52		0.01242	1.56783	13.3407	13.3534	25.2481	5.94019	32.897	52.0247	49.6607	24.0379	50.9854	56.666	59.5888	605.993	28.1886	68.9187	57.231	271.823	42.5558	45.4317	50.9663	35.5204	32.4571	104.571	18.2423	29.3733	31.4985	40.3272	30.5762	40.7528	108.834	34.3859	926.162	117.125	118.752	34.3618	46.4234	106.082	35.676	149.128	23.7138
F1.05.54	1	5	54	A	WT	72	53		0.012086	2.50032	16.9369	16.6818	35.3897	9.05608	46.2432	61.1507	68.542	23.9565	62.6137	65.8857	71.4264	666.079	28.8106	78.9023	68.11	323.034	45.9345	68.899	88.5225	50.901	58.296	103.315	32.6367	34.2519	41.3348	36.6285	27.7172	43.6981	136.637	40.2193	857.323	137.396	105.588	44.9883	57.7384	109.686	36.5097	163.457	35.2638
F1.06.09	1	6	9	A	WT	74	120		0.005328	5.75903	19.7502	22.4748	45.6695	13.0355	60.6911	80.2579	61.4893	30.8642	100.446	101.959	62.3146	311.748	48.174	101.375	66.671	219.668	38.7131	58.707	69.182	37.3159	63.2712	141.393	27.7454	45.1037	59.9103	56.6403	40.1043	48.7195	126.617	41.2379	698.688	117.807	205.419	60.0073	67.348	166.294	47.7978	80.7185	38.9949
F1.06.23	1	6	23	A	WT	74	117		0.00549	1.41924	18.027	16.8318	38.966	10.3794	57.1214	57.9896	34.9882	23.3377	77.8336	79.5649	48.342	248.589	37.2737	95.4972	51.2459	191.138	34.1544	42.1806	59.7329	28.5618	45.4265	124.483	26.9648	33.9197	44.4775	48.3894	35.2882	37.0597	102.511	36.1595	757.042	127.592	178.685	52.981	63.7339	136.067	37.1073	77.7416	29.3367
F1.06.54	1	6	54	A	WT	74	81		0.007896	3.30663	16.733	17.5735	44.0951	9.23235	54.8645	65.8344	49.2809	40.6615	72.084	84.8787	52.8718	264.267	48.6983	98.8028	37.62	205.498	31.5596	40.7208	56.6197	37.0619	53.4025	93.5118	31.6131	35.9613	47.0904	56.8805	31.0393	41.8066	109.984	40.8605	1063.47	140.471	173.437	51.814	50.5932	121.746	34.516	75.249	34.548
F1.07.09	1	7	9	A	WT	74	89		0.007162	90.0376	19.7664	19.5177	47.8165	15.2739	1036.55	82.4601	609.254	76.5201	204.441	155.857	243.465	801.313	6950.58	1780.71	225.776	287.562	55.7763	48.4152	70.7074	40.8553	60.0871	138.184	29.5711	146.029	43.0666	107.681	1110.96	64.81	627.106	86.06	925.088	151.945	427.023	165.952	13648.8	1523.73	322.381	6567.68	137.736
F1.07.23	1	7	23	A	WT	74	65		0.00992	77.6364	14.8309	14.2659	33.02	9.35224	1503.79	85.5125	828.689	57.8804	251.944	148.605	309.969	630.018	11058.1	2871.78	344.803	298.888	41.0099	40.3346	62.2024	23.6849	46.7031	107.59	23.3762	176.472	43.899	101.637	1535.14	72.5117	871.748	77.6322	775.169	127.504	502.386	230.068	21175.1	2230.2	610.449	10214.7	200.795
F1.07.54	1	7	54	A	WT	74	47		0.013726	73.4918	13.1335	11.8147	33.0081	7.50439	1282.53	75.1934	642.341	38.441	172.655	108.575	238.089	792.635	9920.91	2335.77	224.258	266.769	24.8639	36.5054	59.8315	28.9703	34.7826	84.8809	23.5145	142.126	34.5121	86.2714	1229.91	60.694	582.077	53.3887	958.898	134.462	359.233	141.707	16761.4	1673.4	448.365	7424.07	132.6
F1.08.09	1	8	9	A	WT	74	112		0.005712	59.7381	22.0028	21.7903	49.4548	14.6993	300.412	99.1043	205.812	47.0514	99.2978	90.3621	175.609	1323.19	389.003	254.364	133.018	414.673	72.1703	86.557	167.372	60.1772	86.6317	167.148	35.0502	77.8598	58.9882	60.6708	207.803	67.7335	289.195	60.5226	1065.85	164.113	335.113	96.9201	1075.37	254.978	138.418	862.064	74.9765
F1.08.23	1	8	23	A	WT	74	124		0.005176	38.0944	22.4145	22.8259	53.4275	15.0272	385.252	98.5273	280.676	47.531	115.098	118.054	161.996	1205.78	532.685	389.937	159.276	442.31	64.4916	82.5912	173.571	54.4553	71.8727	203.929	40.985	71.7228	66.6726	77.0113	262.426	79.7015	323.892	76.5703	981.589	185.654	351.555	119.142	1348.09	351.334	201.363	1309.75	85.2458
F1.08.54	1	8	54	A	WT	74	608	removed data	0.010518	45.4153	NA	NA	NA	NA	NA	NA	NA	NA	NA	NA	NA	NA	NA	NA	NA	NA	NA	NA	NA	NA	NA	NA	NA	NA	NA	NA	NA	NA	NA	NA	NA	NA	NA	NA	NA	NA	NA	NA	NA
F1.09.09	1	9	9	A	WT	75	53		0.01211	0.671463	8.52424	13.0894	20.7496	4.55913	33.9964	43.1479	28.0675	9.88645	52.9218	50.9682	44.8104	265.384	31.0512	57.1005	27.4337	134.503	20.0629	25.6776	33.7968	17.1617	25.1498	86.741	25.6495	25.4188	29.3075	31.3267	18.4375	21.846	82.6242	35.1624	678.394	73.9742	101.135	29.4496	42.7415	90.3423	24.8232	51.1967	25.5221
F1.09.23	1	9	23	A	WT	75	74		0.008608	1.5082	12.9402	16.1094	32.1176	7.01923	44.2208	55.8399	44.267	26.0284	59.5183	69.9042	57.1992	323.14	39.9805	82.6755	37.4231	164.384	22.9717	35.5448	53.0955	29.003	36.0757	121.275	27.0951	35.2105	34.5351	43.6518	33.872	28.8419	107.985	65.2939	763.465	125.633	122.771	41.3633	57.6967	135.337	34.1671	88.7609	29.8433
F1.09.54	1	9	54	A	WT	75	62		0.010292	0.720545	9.65347	12.7229	25.2224	6.99172	40.4187	44.7008	42.3623	22.8142	48.9679	54.371	47.9949	288.261	36.8067	61.3668	31.334	135.578	25.1019	29.0155	39.2503	20.2354	30.3554	67.5859	9.12815	27.0254	31.0756	40.3629	23.6094	31.2735	80.8852	38.9303	527.498	97.8441	107.29	33.2625	49.4226	87.1885	29.6405	54.4714	27.4313
F1.10.09	1	10	9	A	WT	75	28		0.022638	71.584	20.3804	21.633	68.8799	19.7087	8591.95	1077.42	6635.95	361.36	539.525	382.595	649.319	1258.4	29142.1	10128.3	970.969	976.744	101.207	68.8824	94.8922	37.6523	102.732	416.634	72.9827	698.574	135.957	494.912	5712.2	721.326	4291.98	270.393	783.919	250.238	2022.45	697.943	71341.4	9832.06	7861.48	49115.1	1689.63
F1.10.23	1	10	23	A	WT	75	32		0.020226	74.4169	13.417	17.4627	59.192	27.836	6401.94	799.208	6118.26	373.529	331.282	248.725	449.787	934.268	17078.9	7202.2	597.025	903.702	84.7541	50.4337	75.1152	38.9668	75.0985	374.045	77.1459	524.096	115.412	430.187	3986.67	529.396	3616.96	234.233	628.648	353.898	2815.87	893.484	50354.1	7944.79	5818.59	40745.3	1246.23
F1.10.54	1	10	54	A	WT	75	31		0.020348	73.7844	17.2309	15.7753	58.9748	14.2745	9164.76	641.05	5536.12	223.474	561.661	369.22	733.762	1210.65	34496.7	9379.9	1055.17	880.207	63.1102	63.4177	76.5324	37.0458	84.0526	246.854	44.1337	763.053	85.0421	409.919	6118.89	455.246	3576.07	144.646	921.37	207.775	1388.33	427.922	79777.3	9308.42	5256.75	43708.7	1115.47
F1.11.09	1	11	9	A	WT	75	79		0.00809	24.3929	24.0908	25.8382	104.011	41.9362	1489.2	446.316	2399.69	236.737	229.513	288.263	232.831	1746.45	3945.83	2893.94	397.221	1003.72	159.652	94.5565	195.726	71.7275	111.665	425.072	100.783	176.744	83.3377	260.714	886.876	292.623	1613.68	126.898	1087.36	274.268	1042.87	255.992	10048.1	1843.5	2560.82	14498.7	460.643
F1.11.23	1	11	23	A	WT	75	63		0.010194	15.1108	29.8589	38.559	171.886	82.9266	2345.41	714.74	4490.69	478.97	276.95	373.107	278.65	1862.26	6036.41	4873.97	611.029	1342.65	174.045	85.4934	220.682	86.9926	108.855	649.268	117.213	242.542	101.233	376.121	1449.14	492.672	2820.42	247.641	1218.95	368.972	1380.51	342.441	16082.4	3119.63	4646.35	24793.3	804.261
F1.11.54	1	11	54	A	WT	75	93		0.006898	59.1909	34.646	33.8008	126.141	40.8657	4257.28	708.038	4151.85	315.91	408.593	364.733	393.637	1618.42	11657.4	5195.16	763.61	1204.01	136.815	138.259	254.193	105.493	133.016	533.528	109.608	358.343	120.03	352.622	2511.61	547.501	2714.93	228.804	896.637	360.744	1785.67	410.605	30218.1	3826.32	5083.34	26368.2	780.218
F1.12.09	1	12	9	A	WT	77	34		0.015986	3.35129	13.081	16.6106	57.3848	10.685	73.2993	82.2095	65.2785	45.3465	139.49	105.451	84.6906	295.12	49.0341	105.229	52.3074	177.751	40.8281	44.7754	49.1777	48.4346	53.5107	149.022	22.5293	60.1551	41.7782	56.956	30.2709	41.7336	156.544	28.7208	760.383	90.602	127.407	49.6418	56.1586	87.4953	30.9101	78.7888	36.2266
F1.12.23	1	12	23	A	WT	77	37		0.017492	1.55833	15.9643	18.5237	45.9592	9.28164	57.4429	66.3291	46.3978	25.7316	117.283	103.304	89.5013	288.786	48.9121	99.8674	66.0063	207.602	36.5451	53.1411	50.2204	45.335	52.1692	172.319	24.6509	50.9521	51.896	54.0272	30.837	41.8463	208.222	26.9059	587.767	68.3727	124.166	48.5289	55.5186	103.08	37.5418	68.2113	50.0782
F1.12.54	1	12	54	A	WT	77	41		0.01554	1.1896	19.8198	22.025	59.7284	12.9116	88.5114	97.3022	61.9238	51.096	193.246	119.417	101.914	291.064	58.146	108.333	80.9211	203.055	50.591	62.9353	65.4351	53.1203	57.9939	176.873	33.0887	69.3632	61.5384	70.1579	31.2813	45.187	286.897	36.0233	519.129	81.2019	142.197	58.544	75.0384	105.09	54.1614	96.358	42.7922
F1.13.09	1	13	9	A	WT	77	74		0.008668	68.3301	32.203	31.6856	113.432	66.9885	3674.38	438.875	3555.93	359.435	339.739	305.547	362.541	1162.24	12096.9	3878.45	467.78	612.653	94.6434	74.0769	107.033	51.1683	81.6435	330.745	64.7968	394.366	90.2678	328.179	2149.77	274.978	1743.85	151.159	702.163	196.245	592.616	160.448	24432	3284.81	2418.09	16306.6	524.524
F1.13.23	1	13	23	A	WT	77	73		0.008786	49.8227	36.8805	39.2701	143.268	73.783	6220.55	683.862	5231.9	445.202	525.396	451.685	585.913	1378.3	18771.9	5848.24	863.177	962.719	130.502	94.8206	166.903	55.4082	116.347	489.512	97.5764	609.11	117.68	454.622	3788.6	457.044	2796.1	205.889	1277.57	331.023	1034.87	276.531	42010.7	5371.29	3851.43	27452.5	904.881
F1.13.54	1	13	54	A	WT	77	66		0.009694	59.2523	31.6615	24.1745	87.1434	28.0904	10543.3	773.115	6035.25	273.123	662.098	389.072	779.746	1373.24	36317.7	9275.08	1342.72	1030.93	78.7289	92.3893	117.861	63.4781	117.044	320.492	67.7431	919.594	121.856	505.777	6899.01	564.783	3815.59	192.841	718.056	253.004	1671.74	498.171	83378.9	9719.61	5810.02	44119.6	1087.4
F1.14.09	1	14	9	A	WT	77	196		0.00326	63.2759	20.0918	25.2781	69.2618	43.7605	3190.53	491.723	3244.78	283.646	353.83	348.195	297.336	1238.76	8901.05	3561.92	567.12	878.688	92.6277	75.778	160.215	45.6902	80.1703	323.597	66.6031	306.501	90.7613	255.142	1847.65	327.589	1819.11	165.475	416.879	166.203	946.595	233.35	22999.8	2858.15	3382.38	18973.8	559.783
F1.14.23	1	14	23	A	WT	77	202		0.003176	73.1235	35.2174	56.9268	148.687	68.9767	6358.19	1316.47	7757.66	690.505	573.165	626.439	500.62	1975.17	16186.8	8300.22	1011.65	1883.5	185.543	115.259	273.471	93.3601	160.467	859.618	157.707	536.809	175.403	619.99	3587.17	879.812	4391.31	456.555	679.629	417.288	2201.98	498.934	44313.1	6096.15	9103.98	45201	1518.94
F1.14.54	1	14	54	A	WT	77	82		0.007808	41.0405	25.2161	33.7637	89.1137	61.872	2008.65	544.946	3240.43	322.274	272.349	297.049	275.618	1576.71	4806.53	3165.97	416.455	951.612	123.297	82.4795	168.69	66.7408	104.138	403.33	118.197	213.735	91.9342	274.996	1102.03	344.951	1757.03	204.274	571.907	174.902	698.012	177.645	13096.9	2207.11	3307.03	16868.2	625.032
F1.15.09	1	15	9	A	WT	98	38		0.01705	1.2034	13.267	16.231	35.8832	7.7954	73.5274	70.2028	65.644	28.1988	116.928	80.7294	85.9472	302.384	49.3768	105.818	56.609	192.5	34.2623	35.8378	51.3296	27.324	36.9155	161.355	26.9256	45.8061	36.431	64.6238	31.9426	33.4879	170.05	27.3233	561.626	74.963	111.699	36.266	66.1558	102.052	39.2148	86.4517	36.0003
F1.15.23	1	15	23	A	WT	98	43		0.01479	0.777495	12.6081	12.8249	30.9544	7.7179	62.2801	62.6056	49.9699	32.9332	79.9385	79.8813	77.3236	259.954	41.0075	90.795	45.566	172.163	24.6191	35.1715	41.6829	19.8216	47.8525	136.789	17.0695	45.8792	35.2652	57.0717	23.7759	34.2178	130.592	22.8971	559.581	79.3658	118.423	33.4965	56.1537	102.673	30.4198	72.3681	37.8545
F1.15.54	1	15	54	A	WT	98	39		0.016414	4.67489	18.4868	19.1183	42.5276	11.1092	102.692	105.431	80.8608	54.1927	137.005	101.429	110.802	322.824	75.0767	145.332	74.1415	216.252	37.1482	42.2704	71.0155	36.8871	51.8347	120.508	27.0555	58.0884	50.5189	73.409	43.3027	47.3806	150.208	33.6485	787.24	109.042	162.424	56.9627	78.9665	186.815	66.1134	130.251	75.4305
F1.16.09	1	16	9	A	WT	98	105		0.006086	76.7362	35.7486	30.3147	90.113	21.1232	9129.9	932.894	6128.84	341.921	954.053	516.803	904.588	1055.84	22822.6	6879.8	1717.2	1225.55	103.201	337.878	208.413	78.5589	138.49	296.112	74.9526	1088.59	217.458	658.285	5627.8	618.723	3681.64	249.51	904.935	354.135	2151.12	592.75	58223.7	8198.2	5218.77	35086.8	1408.68
F1.16.23	1	16	23	A	WT	98	121		0.005292	67.8068	25.578	28.8671	86.2422	21.1978	6379.92	1445.43	7624.05	592.748	569.892	568.018	543.568	1087.86	11275.8	6760.47	1090.36	1561.44	173.383	195.648	330.711	90.0818	164.652	743.739	158.775	726.228	262.007	735.927	3709.31	896.087	4414.46	395.876	992.144	502.473	2689.21	701.431	36966.4	7618.35	8070.27	41884.3	2084.53
F1.16.54	1	16	54	A	WT	98	94		0.006814	75.1185	29.1774	30.193	82.3725	28.4791	7693.73	636.83	5326.63	277.963	651.281	413.029	714.294	874.386	18474.1	5313.27	1315.72	1044.18	84.9587	262.972	191.652	61.9248	130.43	242.128	70.529	832.366	145.403	498.727	4379.32	394.705	2830.28	190.052	498.358	278.52	1962.16	534.963	46351	6338.05	3263.2	26612	983.472
F1.17.09	1	17	9	A	WT	98	75		0.008564	2.62683	15.3834	13.4514	58.8934	46.543	193.227	102.858	946.617	153.863	88.2667	133.282	58.8444	421.851	331.859	286.052	69.7756	422.152	67.1739	33.827	46.474	31.3869	46.2127	200.314	40.0231	55.0767	39.2913	98.5829	90.1982	61.338	341.061	44.7064	767.467	102.65	190.011	41.6817	731.922	214.803	219.245	1276.69	77.5731
F1.17.23	1	17	23	A	WT	98	64		0.00977	1.23913	14.1624	15.7688	67.582	44.1689	215.501	101.62	1187.51	163.797	82.7213	147.999	59.3579	476.625	372.003	303.149	79.838	468.826	62.0584	41.5301	52.2051	35.4312	47.4266	174.986	50.3528	54.4117	35.278	110.089	97.5278	60.9408	337.522	49.0307	793.13	119.583	191.444	42.2958	705.731	232.643	204.831	1252.04	69.2417
F1.17.54	1	17	54	A	WT	98	58		0.010952	28.5689	30.6958	28.6554	101.636	60.9473	1348.6	363.382	2388.98	291.524	187.433	274.678	158.484	914.147	2929.63	1327.77	277.381	712.203	102.975	54.4057	118.922	41.2058	75.293	362.148	77.0103	171.864	69.6521	221.404	675.557	200.594	879.066	94.6192	827.634	178.152	348.313	86.6021	7196.84	1015.95	1523.29	6691.88	299.916
F2.01.08	2	1	8	A	WT	0	115		0.005584	3.62826	NA	NA	34.0854	NA	38.1999	50.3231	69.614	19.2196	83.8606	72.8894	67.1088	293.903	32.0695	NA	42.3727	136.274	33.2724	48.8428	53.922	29.9745	48.1463	120.896	17.6748	37.3409	48.7403	40.9253	33.1328	33.9584	105.257	21.101	1204.25	110.391	133.465	49.4274	47.0544	80.3177	20.0123	47.3122	24.3374
F2.01.24	2	1	24	A	WT	0	143		0.004468	1.27267	NA	NA	57.8296	NA	57.3269	75.313	119.697	38.2057	119.36	127.91	110.431	504.155	49.4119	NA	93.758	310.437	58.8804	60.8749	84.3728	44.8559	53.72	176.134	40.5486	74.6556	58.0892	75.632	64.4617	63.7185	170.171	49.8782	1348.2	129.831	346.734	63.9931	125.213	174.192	42.9971	76.0709	56.2301
F2.01.51	2	1	51	A	WT	0	90		0.007076	1.21752	NA	NA	59.9801	NA	60.1126	67.8809	107.743	49.0394	128.805	123.694	95.0909	415.849	58.4124	NA	85.7211	262.555	54.7189	63.7139	68.6	53.4409	59.3989	160.031	50.8803	63.1548	62.8555	70.841	53.9011	56.1234	157.371	43.2079	1143.71	121.308	253.859	70.3132	75.4704	125.235	46.4076	82.4984	47.8477
F2.02.08	2	2	8	A	WT	1	233		0.002744	2.24256	31.1833	28.0637	104.781	16.6652	44.71	58.8473	77.7566	37.772	104.561	126.855	65.6992	466.382	46.98	118.799	85.1976	278.82	77.0011	77.4313	91.462	67.4199	49.458	144.387	31.5104	44.3947	64.0575	57.7423	27.684	50.2357	139.049	50.3623	1456.33	150.533	350.609	68.0979	62.7268	105.846	26.695	61.5113	43.2625
F2.02.24	2	2	24	A	WT	1	194		0.003304	0.832138	20.4033	25.6148	68.0172	10.0536	40.0408	57.7811	71.8405	29.9651	76.6373	82.1317	64.0781	428.027	42.6326	93.5322	53.696	268.468	42.3242	44.4217	73.7546	65.1611	57.6255	128.015	30.0466	48.0873	56.1275	62.5875	38.9429	40.8004	126.338	66.9329	1157.44	86.2328	296.067	45.0964	74.5086	118.013	24.8681	63.0541	25.2171
F2.02.51	2	2	51	A	WT	1	153		0.00418	2.64657	19.0643	22.9136	61.3178	14.3244	40.6031	48.1741	86.7345	35.6054	89.9213	72.6604	59.1607	317.627	37.4481	87.7461	62.2686	178.508	42.3769	49.6768	56.7337	53.9073	49.9056	106.922	25.6238	36.2984	43.6701	45.6299	22.6211	39.2415	98.7292	39.975	1097.07	95.8381	216.589	52.6822	54.2312	105.294	23.7528	51.1752	22.761
F2.03.08	2	3	8	A	WT	1	39		0.016312	1.05373	11.1728	14.0806	30.0719	9.45432	44.9567	66.8132	98.8644	26.3	69.1659	66.1691	99.6199	398.549	37.8691	106.654	48.6586	159.191	35.4579	26.5783	51.867	26.2059	28.7461	78.934	22.1949	34.2554	30.7295	41.5569	47.0902	39.1944	157.974	42.3666	821.382	91.8097	93.5552	36.5637	72.7613	141.316	31.0119	63.9705	31.2986
F2.03.24	2	3	24	A	WT	1	62		0.010374	1.09507	19.6642	22.4428	50.1684	14.666	63.8563	72.6397	91.8247	42.8407	107.41	89.18	129.742	447.143	47.6648	124.328	89.1091	188.033	50.1148	46.9687	58.9318	41.2966	42.0064	97.5409	40.4006	51.1032	42.62	53.9682	60.2652	58.1704	210.156	75.9987	944.536	83.7428	135.751	59.5908	123.548	227.196	53.2905	77.3259	37.4432
F2.03.51	2	3	51	A	WT	1	40		0.016014	1.32418	17.586	18.2355	154.958	11.8312	59.5353	50.0018	81.2921	25.4042	68.7968	68.1507	86.0077	369.47	37.6823	98.7554	61.211	137.159	42.342	34.5496	37.1444	30.1949	35.2568	58.4158	14.7607	34.4284	33.5174	29.5245	41.9238	40.7907	116.186	45.3848	666.666	78.4788	125.688	50.8349	68.3555	151.974	32.8408	53.742	24.0283
F2.04.08	2	4	8	A	WT	72	57		0.011256	1.71612	16.7019	20.8551	51.417	13.2186	83.9701	76.5745	120.129	31.7861	126.621	120.638	129.59	394.266	57.4656	125.942	111.398	180.86	43.4955	42.4151	64.6495	45.1029	47.7579	159.842	31.5726	51.717	45.9297	63.5664	79.7901	59.7215	218.304	74.2911	985.241	110.954	145.445	59.6915	154.211	241.227	65.7785	73.9383	53.8134
F2.04.24	2	4	24	A	WT	72	47		0.01366	1.32872	16.7337	21.8148	46.1804	11.6957	83.14	84.0248	120.68	50.4222	174.48	129.123	162.932	502.794	58.1663	141.262	94.8236	227.791	47.5362	59.0506	83.678	35.7038	48.5139	149.733	44.7641	64.5179	47.8354	96.5769	82.8634	62.9085	271.524	67.5729	1086.81	108.412	163.573	54.4338	139.182	238.454	53.3086	92.9789	54.7993
F2.04.51	2	4	51	A	WT	72	55		0.011556	1.20968	24.9687	19.7129	38.0416	14.3	54.8195	73.8186	104.358	33.0584	83.7113	87.3586	82.3501	387.382	39.5602	112.326	55.1342	303.504	50.9544	40.4001	74.5882	27.4502	36.5255	124.967	17.4124	47.3411	47.3075	79.2547	41.2228	55.2913	249.448	108.019	1060.28	87.5222	173.731	66.248	125.94	218.269	52.9836	76.0318	45.4103
F2.05.08	2	5	8	A	WT	72	81		0.007896	2.47727	23.7625	21.7893	37.2508	8.07524	27.7039	49.2786	42.8044	16.6576	43.8965	103.792	85.8346	1512.41	36.28	66.1574	85.1012	715.17	63.8684	96.5778	176.763	84.5848	52.5844	246.552	25.8533	29.5107	44.3387	34.3868	27.0136	21.0523	209.716	33.1999	1133.34	215.757	380.291	69.9289	35.6734	100.869	36.9847	336.006	50.9027
F2.05.24	2	5	24	A	WT	72	95		0.006752	3.54167	14.92	17.6278	44.1719	12.5091	32.4681	44.2734	71.8877	35.8354	50.3462	88.4309	71.7747	1485.3	39.9125	74.1623	83.2153	486.267	71.5683	145.779	179.206	117.746	40.1362	174.967	31.0625	32.8008	54.9565	42.7762	25.2893	24.8765	167.04	24.5379	441.665	167.702	287.912	64.307	47.5392	88.2	27.1825	284.359	34.8389
F2.05.51	2	5	51	A	WT	72	102		0.00627	1.60665	19.9061	13.0044	30.2513	7.88936	27.2879	38.168	41.4536	26.1539	36.1898	77.4433	78.8191	1415.75	49.5145	69.6572	49.791	731.453	45.9017	49.3721	161.631	36.7252	48.8017	203.846	42.8375	24.1488	32.0175	33.0455	19.6021	33.9141	235.596	40.7086	1199.14	213.986	446.872	65.862	67.5066	89.9491	24.9516	307.699	43.9185
F2.06.08	2	6	8	A	WT	74	31		0.02304	1.86675	4.77442	7.56016	16.4464	6.53686	25.4287	30.0728	56.9346	16.2607	23.5928	42.3033	32.9875	204.812	43.1397	35.054	19.9252	144.517	7.13529	10.1263	24.2839	9.78277	24.6272	23.5095	16.1617	18.1636	18.799	11.3933	10.1833	24.5806	59.0814	19.0631	256.387	32.8049	51.0836	16.5896	34.0788	68.6278	17.9086	98.5848	14.1159
F2.06.24	2	6	24	A	WT	74	44		0.014576	1.45377	14.7532	18.5511	82.3583	12.3202	38.8225	56.003	86.5023	35.8091	58.8027	66.2033	66.3494	399.832	65.0587	77.7684	63.4625	403.934	25.4833	31.883	52.6113	29.8626	47.9542	50.229	42.1821	30.0723	41.2456	28.8178	28.5822	40.2632	110.525	36.418	553.574	71.3845	148.422	42.0758	61.2957	164.674	48.4122	354.991	22.3484
F2.06.51	2	6	51	A	WT	74	38		0.016806	1.25265	6.39284	9.3576	22.6079	7.40042	30.6257	35.7415	51.435	27.2913	35.692	53.8862	39.6695	216.672	45.8501	46.5813	36.3023	237.961	21.7149	16.5241	32.0256	18.4827	31.1853	25.8255	15.6947	20.2462	23.3187	14.8725	20.8515	30.0522	72.8168	23.7827	374.808	37.7414	100.073	25.6042	35.2602	88.5343	28.0586	123.684	19.8885
F2.07.08	2	7	8	A	WT	74	58		0.011062	16.0675	16.6408	19.1992	42.1232	10.2763	535.624	73.7345	328.265	46.9589	110.02	103.186	165.291	966.054	1794.74	559.517	107.978	252.588	42.8509	36.9456	88.861	30.0982	37.8805	127.14	27.4484	69.8091	41.8728	58.7719	343.187	52.584	341.47	35.546	1073.58	101.131	176.324	70.4173	3794.82	540.328	189.5	2034.17	65.7142
F2.07.24	2	7	24	A	WT	74	65		0.00983	7.72524	20.4029	20.9011	74.8734	14.9589	303.365	64.1188	215.934	46.2248	120.992	100.224	159.66	976.364	971.149	361.956	95.9614	245.758	49.0758	47.5454	77.8582	45.7023	47.1193	142.46	34.5621	77.0524	52.7049	61.2068	249.926	55.3666	324.28	48.2731	1252.25	122.544	191.829	66.6977	2171.07	403.003	128.308	1129.93	54.2118
F2.07.51	2	7	51	A	WT	74	53		0.012144	83.5796	13.1611	15.5225	53.6842	11.4313	2062.66	69.2473	1061.19	55.4027	248.958	174.505	206.553	909.755	14706.1	3306.33	323.246	295.12	39.3486	36.6859	73.8642	24.836	44.5077	142.209	32.9473	183.252	45.1725	115.566	1713.28	63.5306	957.681	55.3927	1001.02	131.169	336.44	144.497	27952.5	2645.71	433.305	12286.6	148.804
F2.08.08	2	8	8	A	WT	74	53		0.012072	12.5837	12.0459	11.1103	11.1177	7.7996	323.821	46.0738	224.797	39.8762	60.5612	75.9325	161.591	2641.11	827.257	463.362	135.698	685.311	69.4228	70.6539	228.19	51.4281	66.9669	159.171	55.3907	48.1052	23.0072	14.0283	223.377	45.8911	301.928	43.173	1269.09	259.323	421.864	98.404	1790.03	306.954	210.221	1712.64	61.4708
F2.08.24	2	8	24	A	WT	74	56		0.011466	6.50878	12.915	12.906	12.0007	8.88933	172.1	37.9134	210.901	28.3653	65.9654	73.2302	152.374	2608.63	301.381	238.561	100.205	512.209	62.4802	75.01	193.8	62.214	65.1733	185.331	49.3689	37.2297	45.2267	25.2281	120.725	42.1135	242.954	38.5179	1597.8	179.703	254.858	69.5747	731.816	233.19	115.851	986.629	39.4219
F2.08.51	2	8	51	A	WT	74	42		0.015088	63.8724	18.6864	17.8435	12.7009	12.3167	138.243	35.9234	114.703	29.8307	70.4247	67.0787	199.472	2632.7	308.152	123.235	100.355	542.905	62.6655	77.0055	180.427	82.3597	62.2	100.803	63.3732	41.8105	37.5346	30.5667	111.124	44.8593	197.381	33.5208	1118.62	176.903	134.017	48.9941	886.513	180.701	61.67	505.591	26.4984
F2.09.08	2	9	8	A	WT	75	33		0.019156	2.17177	12.3065	12.6437	14.3041	6.12864	42.2548	35.0094	60.0638	16.3851	65.6145	51.3476	57.0176	275.449	26.0812	54.1948	51.4436	149.82	29.5967	34.4325	42.6886	23.415	35.3925	72.8437	20.9298	28.3495	31.9937	31.4842	33.8565	29.2136	83.4496	27.1449	555.799	48.0385	88.7479	34.4917	62.4656	134.366	20.2776	48.1561	23.7908
F2.09.24	2	9	24	A	WT	75	26		0.024226	1.28966	11.6814	11.1911	15.3052	7.35232	36.5724	31.5578	52.2868	17.3159	64.319	53.3771	69.5235	281.76	23.9638	54.0644	56.9224	205.207	26.2369	31.2157	29.4289	24.9566	33.0717	58.5401	19.9732	29.3878	29.8913	33.812	37.4664	33.7398	108.132	27.0232	508.921	48.6731	80.4106	36.7279	64.4661	158.792	26.0428	44.373	20.283
F2.09.51	2	9	51	A	WT	75	35		0.018328	1.58838	13.4529	12.3004	18.8153	7.87837	29.7404	38.6514	53.1446	22.6892	60.6047	49.357	46.0917	231.27	30.1211	51.8424	41.2735	133.989	32.6255	33.5214	38.3093	20.439	24.2352	51.2692	27.1403	30.709	31.8696	24.2101	35.9398	29.9267	105.216	38.512	412.384	52.9988	83.9977	45.8734	53.8256	144.475	24.5109	50.6529	19.6603
F2.10.08	2	10	8	A	WT	75	70		0.009088	12.3124	23.2749	29.4375	83.6804	35.8591	2440.43	502.758	3029.9	367.317	237.393	257.573	217.803	992.04	7080.8	4160.04	342.274	622.899	107.068	64.122	134.724	45.9366	80.8055	489.247	83.4052	275.113	89.1118	275.297	1318.91	311.81	1844.7	198.066	1249.65	193.547	747.764	187.752	17148.6	2861.26	3566.61	19058	891.421
F2.10.24	2	10	24	A	WT	75	73		0.008714	45.9934	45.5083	51.8815	208.762	97.2036	7759.97	1066.78	10325	1086.64	509.955	741.17	342.245	1657.2	25625.4	10505.9	858.43	1861.72	249.478	85.6986	251.077	68.3675	116.124	1417.73	151.97	607.027	120.616	833.171	4345.93	612.389	4785.56	370.114	2508.65	881.249	2540.53	559.221	57476.6	8531.17	7292.74	49660.4	1545.26
F2.10.51	2	10	51	A	WT	75	102		0.006282	63.9947	33.0039	38.8748	137.533	33.9874	10956.4	1737.8	9727.03	680.779	705.429	707.33	658.309	1733.74	38371.7	15972.4	1379.81	1582.53	147.926	72.4284	207.366	54.6741	245.563	1162.85	168.227	791.343	169.071	778.602	6521.11	957.908	5860.93	419.068	1850.74	512.533	3415.47	978.535	89520	12479	12783.6	74715.4	2927.67
F2.11.08	2	11	8	A	WT	75	51		0.012518	1.73343	23.0033	28.0928	93.2976	50.6155	3036.44	487.31	3120.88	272.442	267.115	272.368	247.584	1471.96	10198.3	3899.54	482.74	930.881	103.843	81.8614	195.304	43.8641	82.6975	503.46	79.3606	236.239	78.4045	239.352	1703.16	287.215	1691.69	194.332	975.756	355.155	1219.93	229.962	26475.1	2704.6	3699.26	19560.2	654.139
F2.11.24	2	11	24	A	WT	75	64		0.00995	50.4863	27.0264	33.9939	159.013	44.396	9234.07	1264.03	6539.86	413.662	553.328	400.742	475.666	1572.56	26548.3	8319.28	1162.82	1425.01	141.435	91.9862	208.222	60.4395	142.526	533.594	69.3819	712.501	171.256	470.451	5314	787.154	3950.27	247.808	1212.21	919.047	5815.57	1246.08	72788.2	7739.37	9060.55	46129	1431.87
F2.11.51	2	11	51	A	WT	75	62		0.010404	6.54836	14.8831	22.8475	110.605	27.2283	348.937	127.86	654.037	102.63	122.722	92.7628	169.436	1397.82	967.536	666.315	171.285	633.922	76.1752	79.9582	128.482	51.3307	72.7733	205.976	59.8725	72.9132	69.6977	114.907	219.082	72.7273	465.228	83.8601	662.951	174.268	441.678	92.343	2487.36	594.135	544.386	3335.91	129.941
F2.12.08	2	12	8	A	WT	77	29		0.022306	0.868233	11.05	13.7975	26.6109	7.26767	19.3032	26.5182	27.9546	20.2765	27.4871	51.7111	28.0131	378.036	28.156	38.1249	25.5778	274.263	33.6902	21.4897	29.1476	21.7152	24.1876	104.877	11.3519	9.28989	24.6233	22.8997	12.3544	21.5868	80.6674	40.3954	1276.4	94.7606	92.5246	38.7178	20.6119	65.1937	10.8184	40.3599	25.2867
F2.12.24	2	12	24	A	WT	77	58		0.011114	1.21744	17.579	10.0761	32.2698	5.12564	20.3495	27.163	31.7456	24.954	30.2101	45.1995	30.2515	292.09	34.5155	39.7379	15.4608	242.071	34.5232	9.65775	24.3717	33.9463	20.1503	55.5824	0	11.4146	24.3662	39.5323	13.5133	17.3761	79.6224	31.349	1297.2	91.2322	89.9388	42.53	23.4685	50.5222	10.2631	34.7651	12.5844
F2.12.51	2	12	51	A	WT	77	30		0.021034	1.50719	5.92917	11.8464	17.4517	5.2669	15.4842	23.9582	49.8423	6.18796	14.5355	31.6304	17.3755	237.203	25.9674	34.0131	14.0417	179.038	14.8497	0.926866	30.479	13.3257	14.181	40.0005	10.4531	4.91905	12.9971	18.9766	4.3693	14.7947	64.321	23.2518	1020.18	62.8782	89.6059	20.7585	14.5869	27.4913	1.75607	17.9442	13.4112
F2.13.08	2	13	8	A	WT	77	73		0.008762	57.043	39.9722	58.4555	164.29	115.157	3655.86	818.67	5451.31	608.934	309.088	335.01	267.639	1018.86	9623.66	5006.38	475.19	943.006	137.568	65.818	176.701	41.3142	89.6784	763.823	106.97	368.59	112.887	405.657	2023.8	497.821	2488.86	255.388	1384.36	375.782	1226.68	295.221	21795.5	3889.11	4533.93	22895.2	962.052
F2.13.24	2	13	24	A	WT	77	103		0.006202	36.4447	27.8069	37.0927	112.799	70.6942	3122.99	513.554	4279.14	620.325	354.672	414.659	351.409	1228.47	8395.06	3645.95	532.244	974.962	183.636	87.0859	183.1	64.9746	79.6474	478.111	105.345	388.111	113.085	405.651	1914.41	314.583	1897.04	218.727	1590.8	316.169	806.715	191.474	20326	2927.15	3094.29	17678.6	795.375
F2.13.51	2	13	51	A	WT	77	60		0.010692	69.2218	12.9683	23.5029	84.1666	22.9107	8038.42	693.315	5059.67	180.216	666.513	336.676	717.693	836.164	24971.8	7008.47	1020.6	761.984	53.4264	80.8871	68.2954	28.309	109.446	193.927	41.8005	635.549	134.499	408.27	5277.51	501.097	3279.15	146.601	832.916	231.337	1635.99	493.164	60331	8150.13	4623.97	33814.3	883.019
F2.14.08	2	14	8	A	WT	77	85		0.007572	29.4604	18.7679	33.6479	121.62	90.9502	1425.87	421.929	3007	410.19	217.552	260.539	180.365	835.475	3847.21	2412.42	297.141	771.274	126.928	86.2415	158.112	60.3541	79.1943	417.199	93.6438	214.594	69.6311	248.77	780.362	259.998	1346.7	187.91	716.724	223.103	637.792	183.512	10053.7	1641.72	2464.54	12598.2	491.566
F2.14.24	2	14	24	A	WT	77	57		0.011138	59.694	22.6263	55.9175	129.684	66.6403	6757.49	1384.33	6573.1	613.989	762.453	577.655	543.937	1029.31	19614.1	8243.44	1267.39	1506.28	162.328	108.958	174.554	49.1931	197.758	691.369	140.173	608.188	153.62	534.331	3951.47	902.953	3584.85	364.472	961.319	342.994	2855.8	670.421	51735.2	6177.14	9904.5	43154.4	1665.23
F2.14.51	2	14	51	A	WT	77	93		0.006872	7.1243	20.395	24.4191	99.8797	85.8202	658.459	256.827	1772.08	242.426	133.199	211.912	140.019	961.756	1800.83	1417.65	182.878	688.742	104.377	84.6584	198.195	66.4284	72.9718	480.44	93.0855	147.32	63.237	160.926	380.779	162.997	730.873	107.007	1023.4	210.975	385.206	120.006	4870.25	953.524	1497.94	7274.03	330.781
F2.15.08	2	15	8	A	WT	98	29		0.022038	1.15119	19.7375	9.40548	31.0298	3.6553	21.7653	29.5563	94.0622	15.9305	31.184	60.0779	32.7209	342.274	27.2468	68.6063	17.8736	186.147	9.55525	12.6865	27.0753	10.974	22.2646	95.0448	8.49485	11.2228	18.6834	35.3181	13.5153	21.3001	121.336	29.7369	834.704	111.076	85.4733	20.7849	22.1392	89.7045	13.2126	67.5383	21.1932
F2.15.24	2	15	24	A	WT	98	37		0.017498	1.14041	25.8379	13.5618	39.2296	6.29281	25.403	39.8786	124.788	28.1351	33.7958	71.9444	44.368	310.7	31.3343	91.2965	31.0633	254.386	15.2689	19.0619	46.866	13.1932	27.6885	138.647	14.3212	16.2727	22.5259	45.7811	22.0348	25.753	131.694	48.8178	932.987	132.328	128.364	26.1284	31.7185	118.841	18.9151	95.8495	28.9197
F2.15.51	2	15	51	A	WT	98	34		0.019074	1.25719	18.3754	11.6077	30.6658	6.28026	25.2403	31.1557	109.629	20.2901	29.4438	63.8701	33.997	191.386	29.0006	87.2678	20.1919	180.057	14.7432	15.1388	43.9587	16.5516	21.6085	153.509	13.8083	14.7177	17.8136	32.9797	20.2034	22.6365	99.7221	51.4428	629.87	119.613	98.272	27.2849	42.5809	118.91	17.8653	105.763	29.7999
F2.16.08	2	16	8	A	WT	98	49		0.01304	3.8601	20.6973	15.0125	46.3362	19.8966	41.8778	51.4442	242.794	41.3642	51.1139	88.0503	55.4384	371.534	56.9043	138.781	23.4864	213.299	23.6984	23.6022	70.1043	20.92	38.2316	216.975	33.1799	32.2828	30.2606	55.953	36.7101	32.8307	192.948	48.1753	882.125	138.632	132.241	41.6753	88.6443	182.897	30.8839	205.262	38.5015
F2.16.24	2	16	24	A	WT	98	54		0.011906	42.4825	17.9957	33.0105	103.302	60.4052	7468.43	862.725	5580.29	330.236	456.864	420.177	473.665	860.436	16855.1	5347.72	849.147	793.923	64.0185	245.044	162.322	45.3616	115.869	229.222	58.4605	623.626	141.349	455.622	4286.53	546.27	2966.96	204.314	944.452	301.54	2341.58	456.999	46503.1	6646.39	5053.32	29201.2	1197.47
F2.16.51	2	16	51	A	WT	98	57		0.011282	38.0761	22.3798	36.3883	89.9048	48.5532	5155.52	461.592	3828.76	292.463	380.691	429.551	380.396	846.68	14579.2	3990.74	671.22	648.221	77.4484	176.249	161.728	41.0389	92.2313	233.551	53.3134	489.613	98.9834	339.085	2818.79	278.05	1772.16	115.369	1201.31	285.196	1395.64	273.928	34434.9	4079.82	2525.3	18985.4	633.871
F2.17.08	2	17	8	A	WT	98	45		0.014106	1.79803	11.349	15.6271	60.0968	34.9855	143.553	79.7433	997.559	133.546	79.6187	132.224	97.5031	355.019	194.531	272.309	79.5321	426.595	66.5033	49.2795	71.163	25.0389	60.4672	265.139	61.3622	66.0949	42.8322	94.6013	110.748	66.0186	303.682	53.7671	744.78	119.577	207.377	59.9243	442.542	299.785	161.979	1091.16	78.4492
F2.17.24	2	17	24	A	WT	98	65		0.0098	1.55026	22.4683	21.6113	51.0332	31.1926	145.055	93.4088	841.373	133.867	116.61	136.317	134.744	516.309	184.76	268.969	105.212	480.353	60.8666	70.6012	85.9599	44.7036	86.7239	284.085	89.1145	72.4119	60.5995	75.322	131.671	81.4402	314.141	73.8132	922.884	108.242	243.418	71.0826	433.898	286.339	118.001	777.556	69.4929
F2.17.51	2	17	51	A	WT	98	72		0.008896	17.9314	26.2564	36.8517	124.921	66.7817	1523.89	547.382	3664.08	455.923	227.92	353.168	209.711	1296.16	2974.03	2355.93	381.138	1026.81	134.131	107.117	199.643	59.8651	120.201	744.015	115.801	291.657	116.132	316.593	795.207	313.101	1398.6	155.05	1291.78	333.045	671.694	162.355	8432.02	1842.5	2663.47	12662.1	649.994
F3.01.05	3	1	5	A	WT	0	321		0.001992	4.31034	22.6251	19.4559	76.1628	15.6018	53.9972	69.3399	173.906	36.3077	71.8299	125.537	80.4414	449.258	51.4166	201.508	41.5098	216.829	37.3784	41.1141	77.8163	33.4412	58.5142	127.312	21.4314	39.1759	42.9066	71.2751	42.4088	52.6143	148.445	55.1711	922.076	152.277	202.125	58.2416	62.0371	183.865	38.1425	118.629	70.062
F3.01.28	3	1	28	A	WT	0	141		0.004538	7.68574	20.577	14.7903	49.4808	11.6088	48.2852	63.8117	137.173	36.0652	65.031	109.685	90.3944	304.65	39.003	181.02	39.2319	136.504	28.8149	24.8057	70.8935	20.784	44.4666	152.496	22.2819	27.8388	34.0238	78.2114	40.1123	47.0469	139.98	49.3396	1005.09	138.284	108.274	48.9314	75.5894	166.165	32.8875	106.475	51.457
F3.01.29	3	1	29	A	WT	0	132		0.004852	2.75651	29.9453	18.4325	69.7669	12.8193	49.4164	73.4484	143.926	36.6182	67.376	129.477	99.0086	358.27	41.0722	202.528	47.3771	216.297	30.6383	19.833	68.0755	18.4744	51.5069	217.427	31.0198	31.7619	43.1464	66.8387	47.31	64.8773	185.693	52.2111	1093.14	139.962	178.528	45.1583	117.207	227.244	57.8633	125.454	61.5008
F3.02.05	3	2	5	A	WT	1	286		0.00224	0	25.8978	24.317	65.055	12.1077	60.2335	91.8556	114.401	45.5712	83.6901	121.078	107.984	383.909	52.5486	212.079	56.6181	229.574	36.1954	33.097	73.277	28.4477	69.7034	159.068	25.1093	31.5741	46.4651	67.493	51.8998	54.6673	159.882	63.8776	885.305	150.094	199.834	58.1437	72.7916	175.53	48.0249	129.741	84.2827
F3.02.28	3	2	28	A	WT	1	249		0.00257	1.37212	31.3101	26.3363	69.5575	17.2122	76.5117	92.2473	138.205	58.5175	108.128	131.9	122.701	378.32	58.4213	230.143	66.5992	259.996	46.8467	41.141	68.0383	34.1319	87.8136	164.854	42.5829	41.8534	52.6691	83.2228	60.1964	70.0506	161.944	72.2288	756.542	95.2065	220.919	75.7839	105.056	197.731	59.9449	132.8	107.826
F3.02.29	3	2	29	A	WT	1	204		0.003134	2.78934	35.6149	27.7958	65.3748	13.116	71.7072	89.3436	116.528	41.1924	102.497	133.822	109.826	416.998	57.3847	225.813	63.4691	271.311	44.4062	33.711	76.1858	34.0751	68.267	170.074	32.648	39.591	52.7151	67.9047	69.1901	65.0348	202.464	69.8722	797.087	111.437	231.527	63.5379	132.896	248.14	47.1798	115.853	82.9384
F3.03.05	3	3	5	A	WT	1	217		0.002954	3.8059	23.994	19.0768	45.4394	10.4853	62.093	81.1754	134.16	46.9045	101.396	122.844	110.286	393.955	58.1711	213.952	56.2065	213.912	37.7887	42.1069	75.31	28.192	56.8309	131.963	27.5446	41.6811	49.2479	59.9289	74.9002	64.9999	152.613	56.7034	949.756	114.642	168.162	58.9103	93.0078	200.51	52.6261	127.014	66.9824
F3.03.28	3	3	28	A	WT	1	221	did not replace data	0.002896	4.46247	40.2869	29.6007	68.5344	18.1719	93.7733	123.045	120.4	48.4604	144.295	159.958	170.614	607.289	83.8794	259.689	95.4588	376.428	60.9712	68.1038	116.582	44.9044	91.9349	200.051	52.9641	71.1761	66.3323	113.085	93.5873	85.421	240.871	66.5429	1373.16	133.201	243.079	71.2311	144.585	205.48	73.357	125.502	98.0109
F3.03.29	3	3	29	A	WT	1	254	did not replace data	0.00252	12.0137	45.0535	28.3582	58.8528	14.733	80.1399	103.312	119.406	52.4875	140.046	155.973	160.329	609.949	57.1133	238.807	91.8315	331.208	61.358	54.5152	82.9619	43.2469	72.8562	193.122	50.4235	53.937	62.1299	72.1465	64.7414	67.0626	203.996	75.8965	1313.83	124.966	276.379	65.8934	124.995	211.014	63.8574	140.05	89.8222
F3.04.05	3	4	5	A	WT	72	311		0.00206	4.00291	23.6748	31.3662	27.5813	15.3977	75.2226	92.069	134.8	38.2664	118.349	114.261	139.492	505.111	109.254	117.242	75.7138	315.226	48.7985	75.4843	85.7321	77.2708	83.3353	155.424	65.914	65.6374	74.4147	47.1812	64.4537	52.9375	152.579	30.3537	5570.81	175.124	169.356	42.907	100.145	111.242	31.2371	79.191	38.8345
F3.04.28	3	4	28	A	WT	72	286		0.002236	3.84875	29.9764	42.3667	60.4792	21.8531	117.869	94.4191	190.503	59.0369	157.904	133.788	166.569	565.821	215.48	149.526	97.3828	350.858	67.6725	88.6996	133.062	81.8786	103.002	193.017	73.6637	91.1498	80.3142	70.9455	81.5548	67.087	188.781	50.5753	4738.75	227.777	213.62	63.7545	253.039	120.703	45.9875	182.588	40.6602
F3.04.29	3	4	29	A	WT	72	280		0.002284	8.08081	30.6708	35.228	37.0279	21.3034	79.4743	75.0175	200.633	45.0744	119.742	113.435	177.835	603.099	134.575	103.987	93.6453	419.261	67.5338	82.7912	114.023	64.8936	86.5626	173.252	51.5815	75.3464	61.5095	49.6807	53.5496	57.7948	175.551	46.694	3199.79	179.587	203.938	52.7506	148.803	142.711	32.1107	128.543	28.439
F3.05.05	3	5	5	A	WT	72	160		0.003998	5.82152	24.8612	24.6887	44.1123	20.9328	102.283	94.9533	282.303	58.345	63.9762	78.5073	114.447	580.466	168.196	209.159	65.9632	311.68	33.2113	26.7523	77.0243	17.5771	66.6084	177.782	32.6167	68.9979	42.6948	57.0559	75.508	81.2971	296.761	31.5475	590.86	154.608	231.716	57.8996	237.404	204.356	64.2938	330.068	50.7018
F3.05.28	3	5	28	A	WT	72	177		0.003616	4.4187	24.4173	32.0019	69.6666	39.2866	144.062	113.115	585.002	65.028	82.8915	139.018	156.262	801.638	696.697	487.582	87.9099	468.324	43.3076	39.9776	89.4116	21.4708	79.0162	258.008	45.449	88.6922	50.9879	72.7926	126.322	82.5574	423.262	77.5209	791.672	216.71	268.715	65.3339	673.711	309.144	125.919	724.609	80.1044
F3.05.29	3	5	29	A	WT	72	136		0.004714	4.17973	19.2563	22.7506	43.2414	21.2816	83.6986	96.8644	291.48	58.0702	74.4947	92.7593	138.213	707.154	207.04	220.382	57.2818	335.226	27.4482	34.1151	73.0504	17.6166	70.7937	159.433	32.2378	61.7912	50.5305	57.6189	59.778	72.7426	260.114	49.2931	531.229	144.924	240.641	55.2782	286.698	276.909	86.1085	378.356	56.8018
F3.06.05	3	6	5	A	WT	74	79	did not replace data	0.008102	11.0839	6.02994	5.99121	50.1847	8.31481	25.3627	29.8419	108.627	15.3459	21.5552	31.8626	22.8407	70.2805	67.8778	73.7476	16.2343	82.4527	10.31	1.06102	19.6709	5.21031	14.1492	42.5279	6.40633	17.7543	11.2478	15.0918	16.7938	19.3403	51.6168	15.5074	387.15	40.347	49.603	16.0328	77.3259	55.0532	12.6635	88.8705	17.5983
F3.06.28	3	6	28	A	WT	74	207		0.003086	4.4187	23.7604	23.8454	54.1226	19.05	87.304	88.1991	294.368	45.3921	65.7747	102.809	89.579	333.895	289.332	307.605	61.9621	337.363	28.1858	28.6999	59.9871	18.0967	53.235	129.428	34.4192	55.368	39.0187	56.3136	77.3951	57.4706	218.572	53.2619	665.201	101.476	198.194	44.0088	316.082	213.601	69.4939	316.153	70.974
F3.06.29	3	6	29	A	WT	74	248		0.002576	1.69396	29.1909	22.8582	65.0553	18.5933	64.8473	91.3471	173.892	35.8182	64.1109	114.486	96.5989	305.185	69.414	212.867	48.5999	285.573	35.8737	30.2793	61.1564	17.1434	58.0787	108.77	24.6659	52.159	43.1962	57.8451	55.3556	53.1863	137.983	53.5449	895.66	105.567	190.451	48.8473	108.603	191.79	46.6029	151.078	67.1979
F3.07.05	3	7	5	A	WT	74	159		0.004032	79.3684	24.3718	16.9103	44.7386	9.98375	587.56	105.443	446.851	47.4436	88.3317	124.584	123.413	588.926	3422.95	888.549	107.225	216.592	28.5914	26.2403	62.5066	18.8074	44.7879	76.1389	13.8253	53.8426	31.7916	55.4994	494.403	79.8716	400.309	50.5181	640.473	100.128	317.559	97.0106	7090.31	792.085	350.625	3371.24	141.153
F3.07.28	3	7	28	A	WT	74	222		0.002878	66.716	13.4438	17.9483	49.6462	19.1425	845.292	133.283	761.122	60.48	111.43	119.792	136.253	514.856	4477.2	1382.87	127.974	317.974	34.6381	25.9034	62.0971	20.1589	49.051	111.822	25.2284	91.8844	40.1921	74.7718	745.119	104.126	644.131	53.7697	497.681	150.884	574.548	172.676	9618.92	1180.81	590.481	5789	190.449
F3.07.29	3	7	29	A	WT	74	136		0.004694	38.2872	19.97	12.6884	53.8235	13.0169	319.298	78.8603	245.841	44.3732	70.4633	91.0603	148.198	740.188	1260.25	399.405	94.6777	213.12	27.0828	24.2059	69.3447	15.4809	40.2504	74.9382	25.2092	50.3854	37.3501	59.5986	244.481	56.7332	227.406	51.8478	682.882	75.0106	214.611	81.1733	3237.85	391.389	177.991	1426.7	86.1006
F3.08.05	3	8	5	A	WT	74	192		0.003336	16.9545	22.2607	23.6869	39.6989	26.3612	152.159	112.633	469.276	76.8966	89.7287	131.306	230.593	1188.56	505.844	363.099	87.9661	480.251	33.6787	39.367	96.2978	35.0471	71.2105	154.618	34.9485	61.6466	51.4553	74.8513	123.752	84.0056	388.059	51.9048	532.186	142.005	281.508	65.4327	629.954	286.131	142.223	951.754	67.7443
F3.08.28	3	8	28	A	WT	74	127		0.00504	9.41358	23.5583	26.4955	53.1051	21.9421	201.956	111.561	323.687	85.6423	74.3028	123.044	201.058	1348.01	732.032	440.278	101.293	510.051	38.06	38.0609	107.958	31.4491	70.233	144.054	37.6666	54.9055	59.0085	38.8507	131.742	84.1583	422.023	62.4798	548.581	95.3175	285.12	79.1932	1291.48	286.301	220.964	1250.49	109.29
F3.08.29	3	8	29	A	WT	74	247		0.002596	34.6635	32.5803	38.5066	65.4078	27.5121	197.235	166.331	311.046	72.012	118.432	141.338	324.219	1986.54	607.217	456.159	126.612	516.375	66.1463	68.2077	146.745	42.8588	98.8335	215.077	78.2465	72.8047	81.7709	84.4238	167.59	140.165	591.703	103.143	819.392	208.747	541.774	112.356	857.018	330.064	237.252	1058.78	123.744
F3.09.05	3	9	5	A	WT	75	78		0.008206	2.39858	12.8396	12.7652	25.8752	9.8803	30.1235	36.8736	107.277	24.1914	39.5274	50.0297	40.0827	167.186	34.3852	61.0091	29.5744	158.487	16.2515	17.0867	34.7583	12.6573	18.9032	40.802	15.5982	20.9518	21.6845	17.6253	25.6109	27.1374	90.7885	32.9137	429.986	53.3478	89.4989	31.644	51.3417	101.973	21.5634	54.5729	18.4641
F3.09.28	3	9	28	A	WT	75	61		0.010562	2.07905	10.34	10.4399	18.6606	5.49836	31.3887	36.5672	60.1096	22.5978	33.0009	46.4266	37.7719	199.107	32.7882	50.7146	18.9878	161.778	12.5027	13.5322	23.3989	14.7185	25.2446	33.3987	12.6762	16.3653	16.2393	15.6167	23.3713	26.2524	71.0294	49.6685	271.185	41.0338	67.8454	22.0201	39.3017	118.583	17.0471	48.734	19.2276
F3.09.29	3	9	29	A	WT	75	55		0.011712	1.86526	9.76413	8.74468	17.1719	6.69506	31.2435	33.8904	64.6861	11.369	29.1552	39.5626	40.7423	177.786	40.1025	48.6511	19.6469	133.524	10.7288	10.9951	25.3303	8.94336	22.5212	29.1923	10.0909	19.0432	16.0706	14.203	19.8214	29.916	73.8582	25.0183	237.765	44.1699	67.3276	18.6369	40.9269	96.1658	15.8873	39.7741	15.0221
F3.10.05	3	10	5	A	WT	75	80		0.007994	23.5546	27.9133	40.9067	116.598	83.8097	5364.26	671.157	5186.13	495.419	372.298	41.8765	352.172	1188.52	22026.4	7890.37	626.265	857.121	33.1874	61.3902	189.603	29.0502	93.1421	679.236	93.2126	486.404	83.1288	357.283	4193.86	495.95	2554.23	200.584	1046.14	157.081	1214.93	305.967	9245.07	5007.92	1210.97	31781.9	987.922
F3.10.28	3	10	28	A	WT	75	93		0.006912	8.26829	11.8966	13.9146	24.8343	11.6519	63.1839	97.7311	93.8035	28.6188	66.9711	207.418	83.4316	307.706	111.374	104.561	47.2815	117.364	62.707	35.7247	50.5875	37.2898	33.7946	76.4846	20.3017	38.6218	35.6915	34.7404	0	0	106.479	46.1536	491.26	162.058	112.002	55.9441	9537.97	130.635	1249.34	138.108	40.5107
F3.10.29	3	10	29	A	WT	75	91		0.007052	30.9535	20.2029	19.3062	42.9223	26.1233	5667.33	448.817	3235.63	177.451	314.583	71.881	328.084	837.605	25726.5	6046.45	641.244	504.207	40.3778	46.3205	99.0668	28.134	61.5965	271.85	34.2931	385.619	57.5079	238.004	5063.28	371.713	1888.62	100.854	581.823	129.287	876.631	217.298	7609.25	4553.02	996.701	24531.3	632.287
F3.11.05	3	11	5	A	WT	75	598		0.00107	9.95392	37.2347	40.8615	138.528	132.037	1615.22	444.933	3691.2	247.945	183.091	355.599	326.864	1876.31	5488.45	4965.46	337.004	1260.16	117.416	76.3721	262.199	58.0866	132.825	1070.56	95.0957	216.356	88.422	323.068	995.401	346.745	2402.6	165.644	1165.29	398.896	1051.7	167.933	10580.2	2380.54	2719.91	19632.8	363.849
F3.11.28	3	11	28	A	WT	75	390		0.00164	8.6755	25.371	33.8072	170.41	131.906	868.726	415.086	4359.7	272.926	130.121	423.16	241.051	1696.08	2924.28	5123.44	222.185	1485.83	109.954	58.6818	229.463	46.4199	113.055	1734.93	129.287	127.891	68.5586	347.737	595.864	310.94	2520.63	179.588	1016.4	361.185	854.481	117.055	6347.77	2335.35	2886.45	20566.9	371.338
F3.11.29	3	11	29	A	WT	75	275		0.00233	4.4323	28.775	45.6993	148.098	89.0039	1403.96	694.011	4024.1	343.592	192.955	393.184	372.742	2708.06	4540.64	6538.85	330.656	1368.78	109.983	92.5356	245.732	61.9331	131.536	945.15	103.764	163.649	101.538	315.368	831.462	461.421	2718.35	231.866	1125.58	327.232	1491.51	200.042	10532.6	3248.18	5260.82	28929.5	637.022
F3.12.05	3	12	5	A	WT	77	509		0.001258	4.23042	19.9032	23.2675	44.4492	11.0997	81.1871	92.3304	99.7267	44.0402	118.537	122.146	123.983	393.514	40.9771	150.05	72.3398	269.394	52.6281	48.2278	76.234	41.8342	76.813	142.507	36.4233	71.7527	56.8241	60.3086	53.7495	70.2085	143.823	67.4498	1311.81	98.4379	309.491	82.1194	92.7544	132.023	62.1443	75.1359	66.0099
F3.12.28	3	12	28	A	WT	77	233		0.002742	2.87356	30.509	27.692	91.3558	24.3322	85.1424	97.4438	118.282	71.4611	159.147	159.359	171.777	431.012	58.4117	204.565	93.3356	294.071	74.211	65.7748	76.7813	53.6816	82.8686	152.264	53.6632	79.4418	66.6635	62.9383	76.5277	73.6683	159.491	63.3856	1399.83	134.357	239.205	90.6982	106.865	165.428	54.4019	81.1905	65.5618
F3.12.29	3	12	29	A	WT	77	269		0.002378	1.48699	19.606	21.6882	42.4882	12.5532	62.7772	74.8967	103.545	56.449	135.04	111.507	150.508	374.859	48.8905	176.254	81.5346	256.634	57.007	45.2489	76.9513	42.0574	93.0123	172.802	36.8103	65.3318	52.9576	53.4995	60.3709	62.2167	138.421	55.6798	1569.74	127.428	254.794	65.6989	81.828	139.699	49.7583	70.0164	51.9981
F3.13.05	3	13	5	A	WT	77	157		0.00408	22.4511	26.2091	26.8038	99.7899	59.2744	3655	445.58	3030.35	178.25	228.465	252.256	225.737	648.618	10893.4	3408.11	431.349	577.743	51.6487	41.5367	106.712	23.9344	72.1298	327.055	30.4805	296.761	72.3844	249.917	2329.44	324.556	1888.17	133.089	964.164	281.868	1467.91	354.451	27768.8	3703.61	2935.86	18032	533.876
F3.13.28	3	13	28	A	WT	77	88		0.007308	71.2379	26.1293	29.7893	114.758	38.2088	4699.46	716.058	3782.06	229.334	276.698	233.749	204.718	748.236	15337.6	4930.99	541.024	708.497	58.7599	45.9142	84.5836	23.4502	88.6419	401.57	47.3008	327.908	89.6824	285.981	3234.74	543.934	2624.37	148.898	676.587	355.683	2996.8	656.146	37549.5	5501.75	5303.04	26166.8	859.308
F3.13.29	3	13	29	A	WT	77	122		0.005254	69.6167	22.7023	21.8453	108.258	36.8333	5314.79	515.88	3072.37	146.452	362.076	235.94	212.32	783.796	21392.2	4668.57	642.237	565.802	55.8688	55.1057	107.059	30.191	83.5521	252.476	42.1823	350.979	77.6035	228.978	3523.63	370.314	2040.25	132.273	855.066	199.533	1325.73	314.221	46721	5388.36	3833.23	21959.6	617.807
F3.14.05	3	14	5	A	WT	77	166		0.00386	11.7197	28.9946	30.5529	100.756	53.0308	675.452	256.157	1185.98	129.037	119.461	173.173	200.328	1165.18	1687.71	1163.5	172.771	619.229	59.5041	58.3283	129.562	35.6199	77.7568	345.592	68.24	127.614	70.8067	122.858	377.313	177.729	901.491	110.008	684.33	183.553	498.37	102.918	4186.74	790.199	1261.93	5549.38	227.469
F3.14.28	3	14	28	A	WT	77	222		0.002886	8.05755	33.5351	45.6588	160.32	83.7479	3174.44	602.924	3511.33	273.183	280.99	314.859	302.055	1566.59	8730.8	3980.19	571.142	1008.78	83.3316	75.2876	221.87	50.3226	108.259	578.625	92.6669	312.203	96.1066	304.941	1767.55	393.435	2099.09	144.18	1087.68	346.767	1205.36	222.907	21881.6	2833.58	4053.74	20569.7	608.572
F3.14.29	3	14	29	A	WT	77	118		0.005404	6.57738	20.0266	24.2543	86.7311	46.3526	981.56	329.65	2169.04	147.82	133.285	203.788	207.614	1192.95	3270.61	2540.63	247.317	776.181	54.6621	42.359	143.545	28.0366	89.8108	547.528	70.5183	112.339	59.116	173.516	644.697	216.654	1303.84	90.9817	858.096	291.773	731.623	102.305	7974.47	1563.12	2167.26	12778.5	291.714
F3.15.05	3	15	5	A	WT	98	50		0.012694	1.7186	10.0809	10.5597	22.8724	6.00985	38.1341	60.096	118.438	32.4162	62.1411	67.2922	81.0469	340.219	32.8847	77.6042	37.4381	193.714	16.8226	20.61	37.6312	16.6312	30.7311	45.5954	10.8954	27.0001	27.1812	26.5709	47.7055	37.3545	93.9064	55.6694	509.279	45.1809	103.541	35.3321	63.4111	152.523	27.0407	54.6303	33.5254
F3.15.28	3	15	28	A	WT	98	41		0.015642	1.40062	11.1671	13.3014	25.5338	6.79908	31.7907	52.6561	73.6434	19.7401	61.3579	46.2199	78.2835	332.271	26.3105	62.6749	31.6482	166.328	23.3109	23.2189	31.3157	21.0243	25.278	52.5501	25.1075	23.716	27.1836	17.0413	33.0886	40.9604	100.595	58.6327	487.481	39.9646	85.5035	40.2566	49.5812	139.965	27.2857	65.9764	38.9889
F3.15.29	3	15	29	A	WT	98	42		0.01525	1.12029	6.64468	10.3706	17.9395	4.91013	29.7343	47.6265	55.6905	14.9951	50.0651	47.2772	62.2855	336.075	28.5267	55.4421	38.7297	193.576	10.4689	18.8366	37.3049	15.4748	19.8725	39.3721	20.4253	19.5024	18.1861	14.8922	27.8636	32.2271	73.1603	44.2334	441.126	40.6819	89.7816	26.8537	34.8556	105.242	22.3621	30.661	22.0149
F3.16.05	3	16	5	A	WT	98	178		0.003602	36.2442	34.1498	28.8785	114.094	45.1339	3862.42	456.742	2734.62	196.399	248.337	288.242	322.277	901.24	11329.1	2830.31	609.244	627.625	64.8643	125.807	209.439	29.582	102.284	281.621	43.5679	440.791	102.252	318.338	2700.81	326.015	2030.7	120.763	2385.68	326.129	1299.63	210.691	26474.1	3677.46	2451.19	14448	575.339
F3.16.28	3	16	28	A	WT	98	120	did not replace data	0.00532	57.4662	29.9482	30.3461	111.602	45.3052	6138.18	638.213	4346.62	322.923	392.281	384.454	355.922	1152.97	14719.2	4410.62	935.755	847.788	79.5892	140.649	282.307	52.1208	117.04	389.221	67.8236	543.449	119.582	431.677	3617.99	413.624	2861.21	174.356	2220.38	434.3	1657.98	378.188	40911.1	4980.59	3755.86	24533.6	915.11
F3.16.29	3	16	29	A	WT	98	126	did not replace data	0.005064	40.27	39.6149	37.319	134.566	54.1469	5674.19	991.977	5004.44	377.045	338.726	375.077	287.376	1121.59	15590	5483.83	738.82	894.453	86.8556	161.719	315.562	48.4178	127.784	605.627	67.1289	499.504	127.18	406.916	3400.82	599.157	3164.31	214.468	1974.75	423.306	1997.61	367.074	38169.8	5453.11	5926.58	28876.9	1337.75
F3.17.05	3	17	5	A	WT	98	90		0.007114	1.09184	15.9925	17.4565	74.394	48.9287	172.058	134.307	1463.9	133.801	69.1144	152.88	115.959	736.339	256.426	479.626	92.1374	756.614	49.1503	50.3914	86.9614	21.3337	82.5315	435.967	63.2453	64.2911	38.6637	137.193	100.781	83.0764	502.208	68.1073	450.549	119.271	410.307	69.9002	626.348	354.251	311.601	2213.59	110.846
F3.17.28	3	17	28	A	WT	98	83		0.007718	1.93798	18.1741	22.9555	73.8957	37.2024	208.466	149.154	1035.02	136.494	73.8142	154.861	126.309	683.735	340.523	424.713	107.367	792.922	46.394	48.8316	93.1463	30.88	63.3753	354.374	75.7326	83.2052	43.6083	79.5347	144.779	101.82	546.278	79.1967	535.122	142.287	354.63	75.5233	772.376	369.825	333.384	1778.99	104.086
F3.17.29	3	17	29	A	WT	98	108		0.005916	1.46743	14.371	19.059	62.36	23.5248	103.011	99.3095	327.944	54.9679	65.9306	84.3538	115.76	630.244	117.887	170.145	99.4592	564.801	37.9979	48.6656	54.4109	32.0046	59.6207	179.661	66.5577	61.2577	42.1369	53.2113	79.2543	70.2979	252.519	68.3367	565.977	73.0391	351.215	51.5176	306.482	245.721	112.935	635.93	49.0242
F1.01.22	1	1	22	M	WT	0	127		0.00502	3.68458	13.0128	9.90651	27.8788	7.95716	29.4888	42.9052	131.565	45.1278	42.4319	71.2967	27.9264	236.307	37.2844	53.8807	29.0607	130.634	21.6635	30.3841	57.3683	21.5607	30.3804	73.2307	19.652	21.0401	27.6428	41.4455	15.3593	24.3321	69.7095	36.9101	596.604	103.489	235.233	54.9026	27.9127	63.0161	18.3614	53.1578	30.4826
F1.01.28	1	1	28	M	WT	0	98		0.006552	1.75943	16.5277	13.716	30.0748	7.53735	25.2205	32.9691	40.3209	18.8948	46.1259	55.4389	26.0312	189.911	32.2789	59.6813	17.1422	130.838	21.0855	40.1842	40.8371	36.1198	41.0325	97.2092	17.6434	21.2619	30.2121	34.9025	12.1191	27.2779	59.4126	62.3353	553.49	89.0991	179.885	60.534	41.7622	49.4426	18.2782	48.4669	32.5263
F1.01.71	1	1	71	M	WT	0	173		0.003702	9.05185	11.9471	12.323	34.1211	9.4393	35.9893	52.0477	122.206	53.9072	61.2589	69.3894	39.7893	206.178	35.8851	71.4592	34.9866	133.938	22.4805	35.5735	43.0051	30.0839	35.6422	85.388	24.757	29.9531	35.9599	50.19	25.0411	38.9874	71.7408	45.0736	501.416	109.907	266.989	81.848	33.7728	85.1068	25.452	66.5454	37.3082
F1.02.22	1	2	22	M	WT	1	164		0.003892	1.55892	10.5716	10.0868	30.1309	7.52492	39.867	48.1714	96.9117	35.082	53.4058	83.3556	31.7862	269.778	34.1411	68.276	33.8239	123.324	23.3121	30.0867	47.0079	22.3372	29.5413	96.8479	13.4705	25.5926	32.1449	44.0328	19.9847	25.5974	74.2003	44.7189	634.941	97.0236	174.564	53.2726	38.2182	72.9452	24.4185	65.3166	31.1166
F1.02.28	1	2	28	M	WT	1	108		0.005942	0.451807	10.4849	10.0456	26.6435	4.54635	30.7097	34.9876	54.5736	16.99	42.2605	63.6974	28.4025	227.158	26.1494	65.8233	25.8799	121.767	18.9563	18.7221	46.0878	15.9406	20.1992	112.372	7.68419	16.8586	21.89	33.2988	13.9229	19.8021	71.36	24.4053	950.395	113.315	143.87	33.0853	32.5034	68.4198	14.5793	59.7487	22.145
F1.02.71	1	2	71	M	WT	1	234		0.00274	0.434405	18.3663	15.1671	39.6008	8.17953	41.6407	54.3298	64.7256	35.2376	69.4229	93.37	38.3647	204.03	36.7453	79.959	40.3858	136.855	33.0091	38.7919	47.7473	39.233	37.242	85.3816	30.3989	30.4291	41.1551	44.5984	27.1259	35.116	72.0056	50.2977	519.888	101.737	200.368	61.2101	40.2606	84.018	22.6023	60.9561	32.7405
F1.03.22	1	3	22	M	WT	1	84		0.007642	0.945946	11.1595	12.2433	23.9332	8.77242	34.0834	37.3104	60.333	32.3405	51.1452	55.6241	34.0901	269.14	34.0678	65.2679	50.8239	141.06	27.7999	36.3037	48.2655	24.4394	42.0864	242.645	23.3986	27.7854	29.7163	42.9485	24.8091	25.0902	98.8704	43.6333	874.739	116.032	150.232	41.0619	50.5472	136.72	24.3779	56.8615	24.2515
F1.03.28	1	3	28	M	WT	1	66		0.009674	2.1327	8.891	10.6465	24.432	7.18426	29.6179	40.6423	48.5893	21.7857	46.17	48.0274	31.0055	266.457	33.8871	62.6457	39.9945	130.367	28.5929	28.1737	47.0765	20.2809	27.095	256.193	17.7424	23.0754	26.8626	29.9457	22.9718	25.1979	113.785	40.2085	792.799	102.341	123.795	35.5629	45.5718	134.49	22.0426	61.7674	20.1312
F1.03.71	1	3	71	M	WT	1	67		0.009564	3.52381	9.54082	11.049	23.5253	5.81228	38.6864	38.5641	60.3994	15.186	45.7064	46.0297	33.1841	236.685	32.1437	63.3497	38.75	113.904	22.7959	24.2194	40.0707	18.0311	28.1533	74.5471	12.5067	19.5167	25.8837	34.1593	18.2365	23.0065	73.1527	24.0938	740.631	74.9248	154.117	34.8526	35.7972	74.8668	20.0995	43.6578	23.734
F1.04.22	1	4	22	M	WT	72	51		0.012654	0.939948	6.37642	7.39838	16.1425	5.96846	30.8926	39.9165	56.5028	24.0251	30.1178	45.7817	27.0001	184.657	29.5616	54.1222	24.019	132.457	13.7511	15.2117	33.726	15.1086	16.9447	149.815	9.8988	18.4577	18.4465	25.6748	20.3957	26.1867	68.766	43.2451	1500.69	150.316	133.354	31.574	41.9103	111.966	21.9871	70.8813	27.2644
F1.04.28	1	4	28	M	WT	72	51		0.012598	1.69607	10.4741	10.6638	13.7412	4.67389	28.1441	35.7325	39.8577	19.4239	34.2552	39.1054	24.3308	174.579	29.6489	49.233	26.9606	102.686	15.6584	19.0217	38.2055	16.3781	22.5543	100.672	11.7157	20.7189	20.9715	26.1029	16.4961	21.004	58.5372	38.6922	883.863	82.888	86.2952	30.8186	35.1983	96.7367	17.4892	51.8502	17.7061
F1.04.71	1	4	71	M	WT	72	47		0.013546	1.11922	15.3752	14.0621	26.7023	7.97767	46.8371	61.8807	55.9259	34.6592	70.1133	69.8235	41.757	234.698	35.6547	75.4902	43.0184	154.653	27.8054	39.9326	43.5529	34.3722	28.5291	79.2367	18.7505	30.5821	37.7145	43.6186	26.8412	32.8106	80.1693	58.2849	808.895	128.326	140.765	48.3278	43.4953	92.1143	33.4661	64.1481	35.4393
F1.05.22	1	5	22	M	WT	72	38		0.016922	2.83538	15.9416	18.0731	32.369	8.90444	45.7148	58.1517	71.3089	33.0233	60.9831	67.7587	62.2638	627.589	35.1455	88.0566	70.3982	379.12	49.982	52.8696	67.0936	32.6239	49.0526	128.903	26.6787	35.2543	35.4875	48.6342	28.1052	45.62	126.552	41.8487	986.333	138.887	145.433	39.7776	72.8034	126.511	52.8562	184.19	23.537
F1.05.28	1	5	28	M	WT	72	57		0.011268	2.56082	17.8423	18.1162	32.7911	11.5746	44.6218	62.145	64.9073	26.9562	67.2602	82.7434	73.2088	710.127	40.6229	102.881	78.7524	303.934	56.6744	64.0738	104.694	53.0175	57.3746	221.753	39.273	38.0912	45.7373	48.0406	34.1825	50.4374	159.143	59.3886	782.382	140.808	143.248	56.6522	91.278	144.101	52.3056	178.856	38.2687
F1.05.71	1	5	71	M	WT	72	58		0.01103	1.26507	15.3153	12.7804	28.083	8.40204	40.531	54.2404	62.8969	37.4052	57.1857	69.3834	59.0304	601.619	26.0981	76.7515	57.8843	306.276	37.469	37.7402	63.2879	28.6515	41.1498	70.2269	24.2648	30.3223	37.1898	44.0448	31.175	47.3937	114.01	40.6906	926.955	107.872	137.984	34.3629	53.7922	109.603	48.9627	149.381	27.0832
F1.06.22	1	6	22	M	WT	74	245		0.00261	1.66738	16.9444	17.3588	40.2322	7.89015	51.7397	61.8776	61.2735	22.5121	86.078	84.5477	55.7867	277.188	47.5981	94.9374	52.1288	169.077	39.5173	46.3279	60.2998	33.8111	53.6363	109.602	24.2375	42.9855	48.3539	42.3845	32.8036	37.7302	79.7457	52.8784	549.403	112.722	186.935	47.4829	66.9189	107.079	39.329	77.5142	33.2828
F1.06.28	1	6	28	M	WT	74	100		0.00641	0.89798	19.3048	20.1227	39.9879	9.82273	88.1547	77.7492	93.4968	31.7394	102.103	97.6253	59.0349	368.889	74.178	110.017	62.7946	203.818	39.8628	48.7512	84.1462	28.8911	56.6027	199.72	35.2133	48.947	54.7732	56.956	46.7216	46.8012	132.369	53.8295	869.591	151.474	157.73	56.3292	207.157	177.146	55.2107	163.666	42.7975
F1.06.71	1	6	71	M	WT	74	98		0.006524	0.404142	19.9942	18.5037	42.941	13.1334	59.3837	61.9196	101.451	45.4104	89.1914	76.5961	50.9881	271.403	51.9078	103.299	50.0692	200.682	40.0054	41.7063	57.259	30.0333	54.0759	117.224	27.9772	41.9435	41.0786	50.7972	36.6952	41.3244	107.517	53.7065	803.795	160.35	190.516	59.7825	64.242	125.049	34.7699	90.8533	40.5814
F1.07.22	1	7	22	M	WT	74	80		0.007976	76.0064	12.0494	12.6679	29.1077	9.37309	1057.52	67.587	648.915	46.5018	196.036	125.902	255.549	558.117	7790.71	2135.65	230.464	227.9	34.1	36.007	51.9562	25.4134	51.4294	94.2047	20.1801	136.503	37.0747	87.8519	1150.99	61.7605	697.585	56.9214	712.026	125.459	398.353	189.965	14925.3	1704.09	376.364	7705.21	142.412
F1.07.28	1	7	28	M	WT	74	75		0.008524	72.445	16.7097	18.9315	36.0235	10.7904	870.504	59.4039	437.392	33.7843	161.99	118.241	216.311	778.477	5805.58	1364.66	232.055	248.675	36.5031	40.6923	82.5859	32.1893	56.7111	125.297	28.6365	116.669	42.9801	89.0688	859.057	48.1073	466.156	53.6959	1266.37	136.819	235.416	81.7075	11256.6	1118.65	145.219	4914.1	69.2855
F1.07.71	1	7	71	M	WT	74	134		0.004778	82.4405	19.3153	16.6722	47.1974	13.3184	2292.7	335.807	2270.66	255.895	318.321	309.916	399.925	1155.8	13970.1	7249.68	443.718	802.551	122.771	50.0448	91.9721	45.4746	73.0967	358.795	100.657	271.589	84.9205	267.703	2168.84	308.082	2164.75	270.497	773.905	282.844	1719.1	568.195	27555.5	4210.18	3674.77	26946.1	1099.75
F1.08.22	1	8	22	M	WT	74	94		0.00679	52.523	20.65	21.9421	46.3092	12.6944	381.436	91.3485	248.917	46.1031	105.191	98.331	160.125	1102.44	790.045	396.887	160.224	386.7	55.009	76.7546	150.697	44.1464	68.9211	195.441	48.3138	72.3388	55.8332	72.853	281.703	72.4869	309.975	81.9856	1151.56	192.973	330.144	109.31	2064.73	365.393	232.867	1441.95	94.4916
F1.08.28	1	8	28	M	WT	74	9	removed data	0.007316	57.1687	NA	NA	NA	NA	NA	NA	NA	NA	NA	NA	NA	NA	NA	NA	NA	NA	NA	NA	NA	NA	NA	NA	NA	NA	NA	NA	NA	NA	NA	NA	NA	NA	NA	NA	NA	NA	NA	NA	NA
F1.08.71	1	8	71	M	WT	74	112		0.005692	76.9666	16.5507	18.1898	49.0748	11.0964	443.971	92.8122	364.769	55.3333	128.388	110.91	147.238	1026.52	1051.56	538.093	156.76	433.373	69.8969	75.3027	143.018	56.3395	72.1449	166.283	42.5305	93.9928	48.6506	85.155	305.535	78.1492	380.15	57.6747	911.877	158.818	442.206	117.815	2504	351.067	274.019	1946.9	89.2009
F1.09.22	1	9	22	M	WT	75	73		0.008756	2.19095	14.6683	18.1048	43.5519	9.1459	51.1626	69.1218	65.8058	28.6347	79.9882	62.2547	58.4724	290.412	50.6562	91.4445	46.1889	153.319	27.9815	39.7987	52.8998	30.867	48.4165	152.512	31.3549	40.3168	45.2178	48.5937	30.7645	47.1487	122.089	77.263	629.192	140.339	112.954	54.7674	84.905	153.212	51.1287	103.417	38.6525
F1.09.28	1	9	28	M	WT	75	76		0.00841	1.25367	15.8962	16.2374	33.5405	11.3032	61.5112	61.8037	65.5624	27.3787	67.2737	66.73	55.7929	298.468	44.6107	84.4348	38.8872	174.094	28.3745	32.889	55.1794	30.3022	49.1708	124.995	23.4881	38.7777	39.5988	36.382	33.9608	40.7882	92.6046	53.8654	768.617	128.203	116.782	50.6052	82.7274	140.927	44.6317	83.0095	36.65
F1.09.71	1	9	71	M	WT	75	98		0.006548	0.83442	16.6895	17.8	35.7636	9.33025	52.9491	68.7099	53.9325	27.7217	75.0264	90.6921	57.1033	285.449	43.2834	87.2638	51.0292	217.94	32.4084	38.193	55.2016	39.4938	49.869	92.408	28.3094	37.3927	39.3625	55.3899	36.8207	33.7162	116.828	47.1276	1073.85	145.307	173.774	46.7987	62.0974	133.013	41.7724	67.7865	38.8405
F1.10.22	1	10	22	M	WT	75	33		0.019672	73.9998	18.477	19.2796	62.977	17.0897	8787.28	957.872	6210.48	309.383	482.648	324.848	661.708	1250.24	27898.7	9231.88	875.12	957.32	83.9718	72.4096	82.5247	36.6977	112.933	293.251	67.7376	727.139	133.18	417.298	5755.81	641.367	3947.35	229.255	857.162	287.729	2502.9	834.598	73326.7	9575.24	7282.9	46918.4	1497.07
F1.10.28	1	10	28	M	WT	75	36		0.017652	50.0774	16.7907	19.1135	59.9807	13.5925	8503.25	736.267	5159.99	230.824	556.865	326.577	674.604	1154.3	29732.4	8540.33	1036.73	809.928	65.6243	51.7329	63.2148	33.4696	80.5356	245.922	40.4317	728.057	109.475	398.832	5392.91	535.982	3380.34	181.323	762.338	193.8	1608.06	521.396	69975.6	8076.78	5834.71	39143.2	1226.22
F1.10.71	1	10	71	M	WT	75	34		0.018978	59.0258	21.9343	19.1824	101.454	25.4613	6928.19	1059.67	6910.59	399.807	355.477	302.755	467.119	1113.63	18495.2	8287.42	716.822	987.935	99.0448	46.7733	82.9167	30.7201	99.1277	435.15	72.1509	556.547	110.267	431.663	4396.01	724.928	4368.74	239.76	681.09	314.483	2849.41	820.961	52056.5	9250.42	8232.23	46656.4	1671.24
F1.11.22	1	11	22	M	WT	75	65		0.009804	43.4769	27.0757	27.4796	114.618	49.6231	1676.22	475.449	2782.56	301.152	229.146	292.805	247.354	1745.26	4114.66	3252.07	408.124	1071.6	147.078	94.1741	168.074	78.5229	111.371	486.821	95.0128	177.997	86.1564	234.406	977.918	342.213	1922.04	173.762	1090.69	303.797	1030.17	230.782	10582.2	2103.77	2903.42	15866.4	519.657
F1.11.28	1	11	28	M	WT	75	68		0.009352	31.6706	28.5172	39.0069	130.664	58.5835	2562.79	790.033	4783.58	417.624	297.596	437.263	262.707	1534.3	6469.87	5579.54	573.556	1332.19	176.944	95.5126	198.845	106.102	123.823	764.484	140.723	243.955	111.399	395.651	1475.93	555.666	2931.15	246.824	1079.46	347.77	1489	346.735	17421.3	3365.4	5121.55	27621.5	827.186
F1.11.71	1	11	71	M	WT	75	88	replaced with data from repeated analysis	0.007306	50.3632	46.709	67.7985	77.6246	81.8605	3985.23	818.688	4594.75	449.899	468.48	579.473	544.054	3386.33	9288.04	5013.87	876.62	2154.31	284.212	211.19	427.571	174.17	196.297	1063.92	173.959	387.658	182.827	424.652	2343.75	555.706	3107.2	310.723	5368.94	996.488	2096.15	402.172	26068.2	3975.12	4652.81	26056.7	747.562
F1.12.22	1	12	22	M	WT	77	40		0.015984	1.4613	16.8822	20.0159	57.3466	13.0556	66.6651	72.8264	69.9951	40.8406	137.615	107.208	86.2008	269.565	50.6429	102.494	69.7164	184.16	37.8766	63.2253	54.4096	51.4692	61.8021	173.554	23.5643	55.3046	56.1937	67.5941	33.5978	42.6047	277.086	43.1072	399.165	61.9863	129.758	54.1836	75.5164	98.3437	30.6114	88.9266	36.1865
F1.12.28	1	12	28	M	WT	77	41		0.01544	2.51092	13.0527	12.3244	46.8638	9.34947	61.0717	66.5348	43.9955	41.1633	122.067	96.6628	79.9931	250.701	52.3242	83.3553	52.4687	179.192	41.6474	49.5449	43.9551	43.4633	39.9735	114.072	16.0549	46.0092	49.6121	50.8062	32.2033	37.9223	148.241	31.8276	627.831	80.5863	111.964	42.3961	63.1318	94.9917	31.6638	70.2666	36.8266
F1.12.71	1	12	71	M	WT	77	40		0.016186	1.33107	29.0362	21.6033	63.5267	13.5238	103.491	116.059	82.0022	68.9403	204.238	158.717	132.133	398.232	71.3996	128.894	82.8818	297.335	69.5176	81.4078	68.3903	58.566	71.397	147.043	49.3983	92.3052	77.1611	112.015	51.5793	57.1673	177.793	42.7552	668.78	108.165	201.115	66.5584	75.5766	125.913	43.0657	76.4754	73.2221
F1.13.22	1	13	22	M	WT	77	66		0.009736	55.9543	32.0956	36.3738	131.265	49.3384	7724.88	959.306	6190.02	474.126	587.667	488.294	591.289	1481.94	23690.6	7660.14	1066.33	1120.33	134.346	94.9054	156.559	59.0983	117.927	481.546	116.173	668.127	148.415	526.2	4716.1	635.621	3461.58	253.93	1406.98	354.852	1573.85	455.181	54204.8	7089.64	6124.41	36656.3	1235.63
F1.13.28	1	13	28	M	WT	77	92		0.006986	67.3401	43.4314	39.6935	115.876	35.4339	11294.1	1032.24	8021.45	363.867	938.302	538.413	1019.47	1727.09	38827.9	11211.6	1753.74	1518.52	152.453	123.372	136.082	74.6973	142.508	462.341	110.038	1070.27	183.178	674.168	7584.07	743.066	4845.09	271.526	875.373	278.677	1956.22	594.852	87233.6	10820.4	7215.54	54010.3	1450.71
F1.13.71	1	13	71	M	WT	77	89		0.007184	22.9456	33.0481	31.0501	100.319	52.4727	7816.89	557.116	5675.2	367.14	493.697	384.766	566.916	1305.24	24489	6642.54	1120.77	903.856	80.2898	81.2004	124.005	39.4222	93.3916	316.271	54.3459	653.672	93.2619	428.14	4624.24	372.597	2913.42	187.434	739.929	258.321	1022.1	277.371	55360.7	6844.78	3571.8	31440.2	847.995
F1.14.22	1	14	22	M	WT	77	151		0.004232	69.1275	16.704	21.3036	66.3438	36.9081	2434.09	467.883	2986.91	284.537	255.164	279.393	217.457	865.176	6281	3182.02	409.077	724.45	78.0896	54.1563	108.256	36.9304	67.6226	329.154	64.1407	222.612	79.4653	257.19	1207.03	318.879	1573.37	152.023	299.811	132.997	725.265	157.074	16730.7	2187.41	3143.59	16502.2	535.113
F1.14.28	1	14	28	M	WT	77	217		0.02948	34.5367	3.24623	3.49135	9.73502	3.66528	246.202	48.5457	259.249	22.0012	32.2048	33.8334	35.7875	196.104	721.333	292.236	51.2246	83.2795	11.8702	12.4991	21.6674	5.96838	12.6512	43.055	8.28219	26.4581	11.2665	25.6454	149.726	33.2658	171.3	16.0174	83.2816	22.7208	87.9374	21.4299	1811.68	231.672	280.863	1480.23	50.777
F1.14.71	1	14	71	M	WT	77	172	did not replace	0.00372	56.7639	76.6846	100.034	208.644	107.845	9545.3	1570.39	9651.94	786.761	994.55	833.153	866.768	3568.34	28350.7	11151.3	1686.29	2460.89	340.555	288.033	469.611	203.415	348.246	1048.57	280.166	934.083	318.143	881.746	5650.66	1107.97	5580.74	453.017	946.149	454.748	2637.17	687.085	68698.1	8841.91	11163	57869.6	2135.82
F1.15.22	1	15	22	M	WT	98	48		0.013254	0.679084	13.4092	14.2553	35.8418	8.43533	66.3784	70.8917	53.2967	26.7485	103.779	83.9447	85.4558	327.3	49.5492	101.275	49.7602	153.411	30.6403	31.1639	45.3724	22.1756	39.613	115.689	20.7509	45.902	33.6537	55.9134	32.6573	35.2642	136.455	20.6398	579.885	90.4622	110.717	35.8921	59.1656	96.495	36.7052	87.2388	40.7135
F1.15.28	1	15	28	M	WT	98	30		0.020986	0.81311	11.6672	12.4769	30.1246	7.02483	64.5503	66.5574	54.9956	28.7005	85.1102	73.8986	77.2373	243.73	40.5313	83.9697	45.7501	174.417	28.7144	30.2403	30.3324	29.8956	41.7562	127.014	20.4322	42.5072	31.678	43.2655	25.5415	31.4817	127.235	29.8425	594.346	73.7421	85.7141	35.2536	54.2784	78.4079	29.6467	68.7621	31.5827
F1.15.71	1	15	71	M	WT	98	73	did not replace	0.008722	3.17714	44.5645	44.3877	99.0609	37.8927	270.184	236.047	201.541	129.571	337.576	261.455	328.312	744.266	145.121	296.468	249.27	483.754	118.412	104.716	151.545	81.8349	140.207	308.188	52.6065	153.269	133.012	155.504	135.914	112.592	439.493	118.467	665.544	169.224	461.511	148.513	259.791	362.355	209.207	237.908	144.545
F1.16.22	1	16	22	M	WT	98	105		0.006106	77.2272	25.2645	25.6345	75.0718	23.1136	5568.95	1096.6	6161.46	461.855	503.244	433.924	491.411	824.857	10983	5668.4	932.456	1148.44	121.599	184.922	231.227	90.2694	134.886	582.42	122.506	654.987	209.816	564.908	3172.56	688.796	3383.23	290.214	646.361	356.111	1977.48	550.992	31835.7	6065.33	6106.37	32517.3	1801.74
F1.16.28	1	16	28	M	WT	98	156		0.004112	68.5762	43.4016	50.8377	126.541	51.567	9064.76	839.84	6790.98	471.513	849.442	609.922	787.169	1161.05	21169.1	6648.63	1601.67	1307.9	132.321	305.89	290.296	78.7346	143.332	374.767	91.1467	1010.28	195.118	668.004	5560.07	593.832	3694.65	255.957	1075.26	401.12	2167.49	568.21	53561.7	7739.4	4547.53	34494.7	1356.12
F1.16.71	1	16	71	M	WT	98	154		0.004154	72.2222	33.1008	31.865	82.874	25.9664	7536.3	961.411	5971.17	334.074	741.337	463.637	705.058	980.926	16557.5	5862.09	1435.71	1270.42	100.595	227.067	218.499	86.9938	118.174	329.711	100.13	861.065	225.121	602.92	4597.2	655.775	3495.66	244.738	681.478	349.876	2331.7	592.724	45521	7508.32	5349.64	32262.2	1406.79
F1.17.22	1	17	22	M	WT	98	61		0.010416	0.239629	15.8495	18.2805	88.1592	54.2	514.475	206.312	1707.79	226.132	119.742	185.056	86.3949	634.926	932.75	694.234	133.51	577.583	74.3691	43.9441	76.2879	35.1922	54.7554	302.5	60.2764	75.0591	51.6108	149.311	241.261	112.867	584.294	70.2422	895.702	160.262	275.836	64.1246	2278.52	543.406	685.856	3461.44	203.388
F1.17.28	1	17	28	M	WT	98	51		0.012648	43.2046	33.1836	46.1293	147.708	74.2779	3179.4	629.162	3513.35	359.192	299.862	374.465	274.974	1228.8	6166.2	2414.92	540.11	916.269	110.904	91.938	169.195	44.1281	123.305	434.522	83.7985	309.292	101.386	282.829	1622.13	366.327	1660.21	147.46	812.05	236.542	659.943	145.646	17647.7	2103.27	3179.11	13044.3	611.735
F1.17.71	1	17	71	M	WT	98	50		0.012982	2.01193	17.8756	24.9572	77.4114	46.6866	923.271	278.977	1793.98	218.069	156.594	208.643	116.022	684.623	1591.55	952.695	216.873	613.149	97.2473	65.7803	103.825	49.9484	78.4921	289.844	68.6482	132.983	67.6057	172.25	453.878	144.473	744.207	98.6669	718.12	141.017	356.793	89.9165	4463.53	813.047	1074.94	4973.77	283.808
F2.01.14	2	1	14	M	WT	0	104		0.006162	2.09874	NA	NA	50.1752	NA	47.0714	49.0509	102.813	27.4719	98.8793	101.319	85.2188	382.755	35.8644	NA	72.9477	202.297	42.9382	60.082	60.3145	30.9534	45.1035	139.321	31.3328	48.2441	52.5136	67.5809	39.0383	49.0796	97.9908	44.0495	1132.21	103.013	196.919	57.6472	74.3222	117.517	34.9574	77.3927	32.1255
F2.01.53	2	1	53	M	WT	0	105		0.00611	1.45278	NA	NA	72.4753	NA	56.1035	63.2372	101.03	42.9308	114.171	112.869	89.247	341.748	37.6287	NA	67.3017	192.588	52.891	50.5997	56.6511	56.4103	59.5087	159.277	49.4012	57.1546	50.0377	49.9602	52.6445	44.6263	117.992	47.7653	1185.72	111.105	173.664	70.021	67.6361	114.372	34.9024	67.4043	30.2839
F2.01.71	2	1	71	M	WT	0	202		0.003162	2.5077	NA	NA	70.6349	NA	58.4911	68.7539	107.826	43.4739	125.285	131.184	94.8431	384.255	43.7245	NA	68.1004	227.014	51.8459	57.5536	71.3302	42.4952	53.5105	176.035	33.2982	57.8183	62.2852	55.8926	56.8056	51.2894	138.14	55.2926	1583.26	133.163	297.864	65.4702	89.0517	123.962	36.5148	76.7592	33.003
F2.02.14	2	2	14	M	WT	1	291		0.002196	2.65252	25.3109	20.3617	137.011	11.521	39.2904	69.5374	76.3369	26.3685	76.1663	130.513	55.1331	458.176	30.9481	190.39	44.4202	277.167	54.1236	55.6723	73.5629	41.7465	60.9174	254.107	27.822	37.3019	56.676	74.8321	23.3002	43.1598	128.244	23.8808	2290.87	128.381	333.516	51.6642	44.5554	71.235	27.4439	60.028	29.3188
F2.02.53	2	2	53	M	WT	1	201		0.003192	1.89376	28.8783	30.2224	51.2304	18.5083	59.0308	61.4727	130.498	40.4988	126.157	117.065	92.5301	465.843	54.753	141.393	84.6452	432.628	68.2921	63.2695	86.4639	73.4715	75.406	168.864	29.094	62.8592	65.9508	84.5728	56.2353	58.1562	205.918	65.6814	1417.65	154.322	405.656	63.0163	90.9787	186.626	34.1208	97.1676	42.173
F2.02.71	2	2	71	M	WT	1	249		0.002566	4.30293	23.3328	23.4083	53.0715	15.7739	59.2274	61.245	116.136	40.9276	119.867	121.83	82.9367	421.395	49.001	133.617	62.9629	355.236	58.1232	48.2286	77.9096	43.8206	69.4417	197.63	42.2309	64.5315	56.0208	63.2509	50.8657	51.6773	189.565	61.9567	1952.8	176.818	369.406	62.6271	100.849	155.969	37.8583	86.4903	42.502
F2.03.14	2	3	14	M	WT	1	46		0.013994	1.83474	16.0824	15.8961	33.7885	12.6869	72.3524	66.8422	93.4346	21.4786	102.687	78.0668	125.035	453.884	52.221	122.97	88.5192	181.106	38.4487	42.43	68.4041	36.4829	46.1642	118.012	29.6307	41.2943	45.0249	55.7022	72.0723	52.2844	235.102	67.3888	718.178	90.1375	115.642	57.2888	127.803	255.918	47.8112	69.1931	48.9446
F2.03.53	2	3	53	M	WT	1	38		0.016982	2.35683	18.9334	20.522	34.4406	14.2774	64.206	46.5361	81.5056	35.9186	104.317	76.4005	99.4627	386.665	42.3938	110.27	79.6473	171.426	44.4573	56.0069	55.6144	40.8714	36.6065	112.178	27.4164	42.6375	41.2069	49.5876	65.9154	49.4852	246.645	70.0576	768.615	87.748	90.9839	59.0785	110.898	285.578	39.6737	75.1035	35.7413
F2.03.71	2	3	71	M	WT	1	56		0.011484	2.13512	21.2699	20.193	47.2215	9.63125	72.2187	62.2073	75.9256	21.4695	122.954	111.068	121.968	451.321	44.4936	111.17	93.1094	201.405	54.9156	53.8502	68.6597	34.9554	42.3102	107.601	42.1638	54.2702	49.0317	51.8165	56.5345	52.9598	200.194	71.3138	869.436	99.893	140.96	59.1547	96.4061	200.851	31.3618	70.9867	43.1102
F2.04.14	2	4	14	M	WT	72	53		0.011972	1.9921	19.7072	21.9867	65.2018	14.7917	98.8805	92.91	138.147	38.2074	182.103	141.87	161.163	492.834	62.0122	154.988	89.5796	216.04	54.4763	62.1288	73.0179	40.1591	50.3299	156.015	32.3528	59.5922	53.8044	79.9174	116.904	75.3861	320.421	85.5063	1152.76	112.122	155.715	73.4816	169.268	364.585	69.9677	107.927	53.966
F2.04.53	2	4	53	M	WT	72	54		0.011846	1.30602	20.9597	17.9546	61.2924	9.45204	60.6371	58.2487	87.9534	26.3692	109.876	76.0251	71.5937	318.397	45.2426	98.9779	61.8859	182.25	32.7803	49.0209	42.7587	31.8907	54.6264	115.197	26.6127	36.8867	43.1283	70.0961	45.5537	61.2026	171.663	92.9619	768.136	83.2098	147.285	71.3637	102.138	215.922	49.3397	98.1532	42.2674
F2.04.71	2	4	71	M	WT	72	50		0.012776	0.745226	14.1772	11.9672	28.6563	8.58871	40.6148	63.2377	85.8403	19.6439	72.7662	61.4346	57.1892	274.068	39.2188	83.8276	42.0441	189.587	26.3741	18.7478	33.2347	18.661	27.1733	58.5061	14.8362	35.1775	22.7339	47.2269	28.058	38.6428	114.919	31.6583	735.466	88.0028	132.349	34.2508	47.7521	119.243	20.6065	44.6336	24.2225
F2.05.14	2	5	14	M	WT	72	150		0.00427	2.98013	29.8531	21.3702	51.4985	13.8988	33.8674	45.2809	41.0699	21.8504	39.8297	99.7638	75.3327	1368.24	47.9001	74.2589	75.3052	644.926	61.1669	59.4846	181.462	53.3931	48.6886	259.317	37.7479	32.98	47.3755	33.876	25.159	33.3783	195.726	42.2732	964.824	220.822	368.448	76.2962	46.0223	134.447	24.4663	257.987	43.3351
F2.05.53	2	5	53	M	WT	72	84		0.007644	2.03095	20.7153	12.3577	25.1054	8.37727	19.6492	41.7333	23.4639	29.2049	40.7455	68.1838	71.2523	1317.53	25.089	60.2252	68.9741	733.286	46.9553	44.1676	165.264	43.8798	46.0368	231.901	31.5155	20.7775	44.2878	19.4241	18.5169	37.7633	244.648	44.7364	1221.88	214.967	373.297	65.3097	36.1436	96.6855	31.5523	267.215	44.5304
F2.05.71	2	5	71	M	WT	72	59		0.01082	2.08723	14.7965	11.019	22.2091	5.53924	23.8549	51.0722	61.5662	16.5386	42.9882	68.0076	62.7466	1543.56	25.1199	52.8345	62.2904	699.142	45.1019	39.7335	125.702	21.8569	43.0242	188.747	30.0986	23.0154	31.3082	33.9255	22.9349	25.5998	182.506	35.7924	1142.87	191.483	246.607	59.4787	35.4963	89.3379	28.6769	309.154	37.9227
F2.06.14	2	6	14	M	WT	74	35		0.018416	0.851466	14.6661	17.4741	96.9405	12.0816	38.8386	48.5949	99.8242	33.4298	70.7466	69.4558	70.471	366.299	37.5465	80.8433	79.5719	323.965	41.783	36.0428	42.1403	31.9465	65.3249	62.0848	45.3116	32.5829	37.5773	34.9412	38.4578	39.7157	104.996	61.0124	615.602	67.8907	129.379	49.7636	63.4001	179.127	35.1418	199.299	27.8926
F2.06.53	2	6	53	M	WT	74	38		0.01702	1.24073	10.3482	12.694	28.0396	8.37617	39.4504	51.7834	68.5924	19.6409	72.689	60.7944	57.4575	407.203	68.1321	70.4907	58.1175	453.737	19.5242	32.3514	51.925	21.627	62.2589	69.2037	28.676	27.0483	25.8021	30.0942	36.5811	35.979	135.025	30.5071	426.627	62.9418	144.145	35.3651	71.0213	160.928	38.2664	313.937	21.6264
F2.06.71	2	6	71	M	WT	74	33		0.019558	1.37197	10.8581	12.2177	43.3816	8.95143	37.4866	41.7148	98.1942	31.1584	62.4671	58.1508	55.4585	284.294	45.9767	60.3645	46.6138	257.339	27.6101	28.7694	37.8254	24.7819	36.5844	41.9379	24.4331	31.3398	31.5368	37.4478	29.6491	39.9101	94.621	39.2514	453.615	52.2374	139.874	36.6196	49.3986	125.622	33.6177	106.672	24.6907
F2.07.14	2	7	14	M	WT	74	52		0.012378	73.784	13.7012	18.5925	55.3654	11.2656	1364.17	100.322	900.097	66.8932	222.341	191.494	202.245	789.89	8719.55	2643.79	246.57	327.954	44.2042	40.5782	88.6687	33.8332	54.4068	182.362	31.1508	141.394	45.4795	107.035	1121.75	98.9233	851.855	87.0009	1070.1	163.769	520.531	205.19	15919.5	1661.94	721.942	9172.46	235.818
F2.07.53	2	7	53	M	WT	74	63		0.01009	68.8191	16.0389	17.599	53.2419	12.1724	1451.45	82.7245	753.909	52.742	211.993	153.767	213.835	1103.89	9602.51	2339.53	246.162	313.485	39.3372	44.8452	112.374	37.6852	43.6538	148.898	23.753	141.851	47.7903	107.858	1177.14	68.313	729.144	58.5897	1389.61	149.995	281.83	97.4562	17333.5	1751.12	415.823	8163.18	151.035
F2.07.71	2	7	71	M	WT	74	57		0.011214	0	26.0539	24.8682	105.874	18.7618	187.196	81.5228	163.747	52.4137	147.323	120.987	174.535	943.362	379.248	219.041	116.591	234.528	52.0905	59.5876	89.131	52.1136	56.2765	167.19	43.106	73.6141	53.8179	98.0909	161.365	59.6037	246.225	63.6717	1471.28	142.847	211.984	87.5062	1257.92	356.673	90.6237	740.556	58.3714
F2.08.14	2	8	14	M	WT	74	47		0.013536	44.7392	18.2703	17.0114	15.6392	12.7594	176.671	30.8254	87.647	32.4267	54.8756	53.962	167.612	2973.06	251.171	118.664	119.962	585.525	67.2709	113.877	216.574	87.9841	50.5847	77.0261	47.9873	39.6975	42.0137	19.5063	125.824	42.9827	254.454	31.6655	1207.47	238.793	179.24	47.3446	644.624	134.253	66.6332	447.055	25.2452
F2.08.53	2	8	53	M	WT	74	36		0.018012	67.5949	13.5777	18.189	10.2221	14.7778	592.858	57.0553	324.053	50.5483	104.211	90.2066	218.62	2392.07	2802.13	830.133	167.744	606.52	66.024	82.251	252.712	96.7838	61.1846	109.957	44.5643	85.4405	48.5526	42.2305	421.562	63.9524	395.499	56.0348	1332.14	238.209	510.25	164.108	5833.06	564.664	350.82	3037.19	100.044
F2.08.71	2	8	71	M	WT	74	34		0.018728	17.7767	18.9847	19.337	13.7985	14.3706	105.813	33.7213	176.439	36.6021	77.7287	74.6753	170.133	2166.34	215.207	146.447	103.58	450.29	75.5164	65.2676	146.307	58.5841	67.151	152.991	64.8744	37.8034	42.662	26.809	75.6523	39.243	185.594	41.994	1400.31	113.867	151.072	49.3355	496.19	203.34	62.8506	555.651	24.8472
F2.09.14	2	9	14	M	WT	75	27		0.023904	1.41129	9.84024	9.10169	13.879	7.04656	28.3623	34.1105	50.4194	19.2673	55.6563	43.175	59.0036	256.516	24.6446	53.9914	49.7987	160.388	22.8857	25.4179	41.1613	24.7908	29.5336	57.0615	21.0513	21.6788	23.7188	28.3019	31.932	28.2964	110.882	34.6237	381.703	50.9616	113.964	35.1627	53.2857	172.225	24.8127	39.1002	21.3641
F2.09.53	2	9	53	M	WT	75	31		0.020864	1.12393	10.1238	11.5376	14.1838	5.7737	32.2915	35.4242	63.9761	14.7271	51.8356	44.81	52.2903	233.505	27.4277	50.9575	43.7965	170.329	26.5321	32.2206	29.0126	18.5531	25.4232	42.8992	23.6112	30.0553	28.729	33.3138	35.049	27.7261	94.2056	33.3215	401.757	45.5303	75.3738	42.0409	42.0842	144.559	18.1077	33.6967	17.0141
F2.09.71	2	9	71	M	WT	75	29		0.022306	1.1194	10.9029	11.2334	17.1606	7.77921	41.4095	35.778	65.3741	21.0459	72.9799	61.7741	62.9249	292.07	40.6305	62.9543	48.8651	228.438	27.1684	31.1782	40.8755	20.4905	31.1865	46.01	21.3236	36.7724	33.1357	25.4446	37.4463	28.6879	87.9215	37.4368	467.867	49.3097	87.5056	36.252	67.0714	122.495	20.5663	66.1003	23.8655
F2.10.14	2	10	14	M	WT	75	70		0.009186	65.6148	27.7784	38.601	139.608	38.4358	9463.75	1485.95	9135.64	759.538	570.57	659.981	463.571	1709.83	29499.8	13433.2	1066.7	1654.65	170.591	68.6737	181.774	52.6756	138.115	1115.59	142.531	689.718	142.139	694.794	5399.85	864.456	5378.39	398.57	1640.81	503.675	2831.93	774.039	71084.1	9895.71	11373.8	63367.7	2402.76
F2.10.53	2	10	53	M	WT	75	59		0.010936	69.3857	27.8025	25.2151	84.5792	35.0511	10520.6	858.028	6604.55	325.532	629.025	495.551	466.379	1450.48	44749.9	11982.6	1185.01	957.383	93.5678	74.4466	153.458	40.5147	134.155	488.94	75.8701	706.938	103.838	467.552	6150.9	501.296	3849.55	192.732	1377.52	338.805	2201.46	664.614	90769.3	9988.8	6764.01	50653.2	1440.16
F2.10.71	2	10	71	M	WT	75	74		0.008656	34.5776	29.7108	27.5085	84.4774	44.1911	9419.54	495.709	5703.44	369.651	622.786	444.698	437.275	1378.29	38061.2	9175.48	1216.89	1022.79	110.496	73.2344	176.887	36.957	74.1456	453.487	62.0494	744.904	82.0874	498.136	5705.38	293.534	3495.93	179.122	1514.78	336.766	1247.69	306.644	79641.8	7348.01	3759.7	39361.2	805.114
F2.11.14	2	11	14	M	WT	75	41		0.015682	5.71585	13.1072	17.124	40.5707	25.434	931.946	166.547	1069.39	118.08	124.237	130.545	177.226	1227.52	3083.53	1117.42	211.751	536.909	74.3488	64.2837	135.056	42.2632	59.1201	190.86	38.0881	106.046	50.6819	100.793	515.376	110.067	643.904	84.0335	607.312	149.459	369.104	93.1331	8111.9	953.888	957.984	5709.33	194.631
F2.11.53	2	11	53	M	WT	75	33		0.019164	17.1778	15.5925	17.4942	85.339	27.6361	663.6	170.699	1028.58	134.708	106.979	119.166	143.947	1128.59	1608.26	928.247	171.357	639.509	69.344	56.3506	121.262	27.5379	51.9624	219.584	45.1439	77.4579	48.1805	96.1565	392.553	122.586	711.297	102.202	597.606	173.932	455.402	105.292	4815.99	823.872	919.033	5093.92	185.371
F2.11.71	2	11	71	M	WT	75	62		0.010242	61.1052	32.9947	37.9865	156.816	89.9802	4363.95	751.664	5035.35	485.556	353.656	314.206	303.795	1538.25	13324.3	5216.12	640.733	1274.49	137.773	78.2002	266.211	66.4858	126.199	542.456	95.6086	338.427	98.4692	374.003	2346.4	425.674	2283.51	247.865	1028.9	566.035	2347	422.756	34714.9	4072.95	5082.61	27295.4	923.078
F2.12.14	2	12	14	M	WT	77	23		0.027272	1.06828	13.8075	14.0187	34.8497	4.71051	15.4472	28.1894	27.0853	9.918	25.1871	48.3636	29.2888	312.811	25.2228	36.7235	21.2168	211.595	28.9765	15.5751	37.345	25.3606	24.0373	147.012	27.9498	9.40788	26.542	20.6254	5.37087	20.0935	78.9772	31.2751	1350.18	98.511	68.0918	39.4945	15.478	70.3586	8.08751	34.2419	21.327
F2.12.53	2	12	53	M	WT	77	45		0.014346	1.20339	10.9946	10.9611	32.953	5.02802	20.8617	28.9042	47.7874	10.1112	26.0039	36.5612	22.1091	268.888	25.0537	38.6804	36.9414	300.747	19.4327	26.9091	57.2626	28.1931	29.9422	75.9044	6.26571	13.2498	31.5089	30.4301	16.5757	21.313	86.0629	37.4129	1518.85	98.058	107.613	38.5715	24.5441	78.7412	7.39277	46.5675	26.8087
F2.12.71	2	12	71	M	WT	77	51		0.012636	0.812843	22.3646	9.00317	35.6824	6.10337	19.9132	30.1035	37.6267	8.09161	24.4104	56.5364	23.3077	298.35	30.9635	35.9638	16.8337	221.729	29.4453	12.2114	26.8702	14.5443	31.7766	43.7399	10.6301	15.4316	22.0401	11.7555	12.8984	19.5762	53.8079	11.8057	1134.64	88.7304	129.131	25.9314	20.4053	63.0638	7.97012	35.9356	12.6633
F2.13.14	2	13	14	M	WT	77	58		0.011022	66.914	23.7861	26.805	100.628	50.4428	6078.37	826.346	5324.58	257.518	334.889	267.523	362.61	735.868	14712.5	5617.79	719.434	895.909	63.7409	45.1022	100.354	23.8263	80.2003	422.185	53.4927	495.822	99.4505	370.858	3809.1	557.758	3444.03	195.32	1140.77	523.174	3118.48	719.961	42140.4	7060.64	5434.22	32310	946.088
F2.13.53	2	13	53	M	WT	77	56		0.011352	49.6712	20.0427	38.0662	124.145	57.6431	2799.43	704.559	3335.49	306.737	210.219	207.775	231.121	548.71	8717.04	3813.44	356.785	651.137	83.7632	42.1876	77.2352	30.1583	114.412	501.092	91.1897	232.129	113.653	273.208	1892.94	502.826	2189.74	197.155	685.869	325.638	1926.62	467.38	20408.2	3759.05	4280.65	19645.3	775.576
F2.13.71	2	13	71	M	WT	77	NA	removed data	No Weight Recorded	0.150408	NA	NA	NA	NA	NA	NA	NA	NA	NA	NA	NA	NA	NA	NA	NA	NA	NA	NA	NA	NA	NA	NA	NA	NA	NA	NA	NA	NA	NA	NA	NA	NA	NA	NA	NA	NA	NA	NA	NA
F2.14.14	2	14	14	M	WT	77	78		0.008258	2.70314	13.0469	16.8247	52.4458	29.3109	421.574	133.028	874.216	115.372	94.4418	127.035	122.866	829.973	966.253	687.113	128.22	408.729	61.7548	76.8658	140.233	53.0312	65.0086	265.014	43.7955	73.9599	37.6818	115.612	259.318	108.123	480.139	85.3689	826.574	166.389	269.671	89.3804	2784.92	542.846	687.698	3520.32	186.562
F2.14.53	2	14	53	M	WT	77	63		0.010098	10.8031	18.7318	25.1611	91.5201	39.3285	1047.72	280.1	1559.89	178.487	186.72	194.302	168.557	959.493	3111.6	1686.49	247.482	570.737	84.9637	97.4414	166.22	55.6501	66.0104	343.003	68.1403	139.964	70.1491	155.407	586.187	187.509	789.336	111.674	1137.24	202.403	469.592	128.202	7724.52	1139	1771.12	8146.88	350.427
F2.14.71	2	14	71	M	WT	77	82		0.007788	100	40.9226	104.023	263.14	187.45	4573.36	1660.32	9190.15	1127.95	505.034	734.756	415.474	1579.5	11831	9803.42	771.343	2037.79	284.676	156.867	309.187	102.552	240.126	1479.35	320.63	767.129	218.991	666.214	2527.9	1043.27	4417.51	540.349	1347.72	450.869	2649.09	526.647	32793.7	5936.27	11456.3	51005	2076.31
F2.15.14	2	15	14	M	WT	98	40		0.019908	1.30112	21.8735	12.7751	37.3775	6.21049	20.9608	41.4544	120.754	27.4346	31.1507	67.7576	36.7702	351.596	34.8287	92.4396	27.6248	273.631	15.968	13.6454	43.7647	15.6246	24.214	215.355	15.4473	13.2003	20.1062	40.1552	21.7881	26.7179	133.697	68.6304	847.924	121.68	125.431	22.3539	34.7421	136.959	18.5628	95.073	33.2998
F2.15.53	2	15	53	M	WT	98	28		0.023004	0.935974	21.2288	10.7846	43.2655	5.63478	22.4979	38.0305	120.105	23.8073	33.922	90.8953	37.2593	243.549	27.7525	97.5947	22.3908	200.728	19.6888	20.6034	46.9734	15.9882	18.1212	204.065	19.5568	12.7235	22.9797	46.1948	22.3086	28.3993	124.757	42.9268	896.668	137.746	118.882	29.0437	29.7871	131.64	17.074	89.7012	36.9807
F2.15.71	2	15	71	M	WT	98	29		0.022118	4.01404	18.1296	12.1528	45.5814	7.83071	29.2098	33.1651	110.102	35.3214	42.8639	76.1007	45.9552	259.479	29.6614	91.1056	27.5932	234.434	22.7077	20.9845	51.2056	16.9187	33.4327	114.199	20.2279	17.7327	24.1158	47.9844	22.6799	29.5532	120.453	76.8222	835.728	130.229	126.996	32.1795	37.2	126.913	21.8069	90.6111	33.0172
F2.16.14	2	16	14	M	WT	98	38		0.017	7.95764	19.0404	28.732	74.3676	37.1096	2282.34	326.584	2267.74	266.425	186.094	255.085	168.21	502.156	6235.96	2077.91	295.825	497.278	56.9584	72.5632	109.459	31.5508	68.5845	411.912	50.4709	235.829	58.3967	178.58	1173.3	199.96	1026.28	120.81	1025.81	183.804	567.785	132.347	16037.9	2059.5	1726.03	10149.2	397.132
F2.16.53	2	16	53	M	WT	98	35		0.018498	0.96732	20.565	26.0093	76.8184	33.8832	2120.05	280.666	1721.95	134.13	149.24	211.699	133.131	463.504	6443.22	1775.83	234.921	369.275	39.7128	61.9001	76.5538	23.3877	65.1223	196.316	35.0264	193.418	50.673	160.323	1168.71	168.115	877.888	91.3125	1084.46	168.639	535.883	113.86	14597.1	1869.19	1511.22	8297.32	362.75
F2.16.71	2	16	71	M	WT	98	43		0.01504	53.5581	26.8135	49.0256	126.115	58.9349	5365.67	815.803	4559.69	403.553	358.677	361.101	321.696	807.589	12997.9	4347.21	647.048	704.975	80.7985	165.383	180.837	46.5913	93.5243	306.78	52.9036	523.241	126.744	370.754	2973.67	500.366	2281.03	177.911	1070.28	283.181	1687.39	331.778	34639.9	4700.31	4573.37	23351.3	1037.88
F2.17.14	2	17	14	M	WT	98	73		0.008804	31.2161	51.4308	49.3697	162.825	101.329	2936.52	780.538	5802.06	675.304	298.58	437.514	285.009	1416.67	5154.34	3827.96	455.925	1302.87	152.593	135.19	349.367	72.5281	127.695	1094.49	140.462	357.9	140.174	424.61	1484.31	427.797	2605.97	222.476	1534.55	556.33	1145.89	277.345	16763.2	2906.7	4006.75	21509	1039.14
F2.17.53	2	17	53	M	WT	98	51		0.01244	0.571686	56.9426	82.0227	179.421	149.634	1156.44	512.081	3585.63	688.017	274.269	282.319	242.343	1049.91	2169.59	1775.68	280.512	1084.8	179.89	112.908	175.745	119.941	144.095	622.328	171.552	245.952	154.665	279.543	637.219	286.535	1242.81	202.727	1219.44	290.295	603.415	214.726	5728.69	1419.02	1898.5	9427.48	507.009
F2.17.71	2	17	71	M	WT	98	74		0.008696	0.660234	21.9225	23.6123	74.4217	43.0401	289.533	145.559	1296.56	182.045	122.179	179.933	121.913	534.827	419.529	518.516	120.404	461.969	82.6305	75.7379	104.14	43.2951	64.5597	305.391	75.1112	113.129	69.1672	154.979	175.356	95.7326	487.138	71.2072	1062.13	149.898	312.056	99.2385	1162.22	428.318	378.218	2254.9	140.253
F3.01.01	3	1	1	M	WT	0	199		0.003218	27.8604	42.4051	29.2499	62.6363	11.8655	64.0933	82.5556	130.459	53.3766	84.3873	143.896	98.9106	445.536	52.33	204.415	60.6019	294.027	43.4145	42.7282	99.8383	36.4567	75.8702	189.183	30.7198	39.0481	56.3961	70.7501	47.8788	73.1876	178.692	64.1457	1169.57	189	245.586	63.585	97.8214	217.004	52.9196	144.584	71.6547
F3.01.34	3	1	34	M	WT	0	148		0.004338	2.47582	23.5403	18.0025	58.436	12.0288	54.7943	66.9255	108.811	42.1437	73.5268	111.095	99.6925	271.164	38.4576	163.486	43.3461	191.74	28.0563	27.9836	59.2865	24.6098	41.2061	136.276	33.3895	30.3456	38.5442	78.9213	43.6748	54.7587	142.379	67.3314	856.974	117.264	122.896	60.2075	78.29	169.121	40.0709	78.5813	60.494
F3.01.45	3	1	45	M	WT	0	177		0.003624	2.09424	28.2347	24.9175	59.4045	17.3563	64.2832	87.7992	99.9943	60.8645	86.8346	123.073	116.26	392.478	46.7299	200.229	61.4114	228.635	42.2866	41.9611	63.6987	28.9874	69.9884	166.234	39.0618	40.2654	52.8016	77.7148	60.9214	75.9362	163.934	73.4788	849.781	117.654	195.174	77.6602	106.884	205.154	54.9559	121.543	80.523
F3.02.01	3	2	1	M	WT	1	395		0.001622	0	29.0198	30.7822	80.6651	17.2643	82.382	121.901	164.442	63.2849	122.659	153.019	148.759	508.439	74.3442	278.389	77.4389	292.383	65.1035	60.3299	100.835	41.0719	102.885	201.37	44.0965	47.7323	76.8576	88.3518	74.6359	88.4396	248.679	60.1778	1055.12	163.285	231.896	81.7666	106.964	297.444	70.3395	162.776	103.473
F3.02.34	3	2	34	M	WT	1	263		0.002434	1.26219	33.9376	29.9358	89.6603	23.8053	88.4296	102.93	141.326	86.7836	128.079	151.008	143.041	454.062	60.6741	246.895	63.6347	261.173	56.8998	54.9945	83.6091	44.722	86.5248	183.253	35.8237	56.0058	69.0518	91.4845	71.4896	77.9351	163.632	85.9106	798.466	127.937	224.279	86.4119	100.265	227.105	51.6166	127.031	98.0142
F3.02.45	3	2	45	M	WT	1	146		0.004372	0.456053	21.4515	15.2919	48.7323	9.51241	47.7446	64.0305	104.606	30.2315	72.0258	106.339	83.011	297.957	40.9773	165.66	42.2706	204.33	28.977	22.9863	52.2153	21.4217	50.9486	132.149	24.3758	29.4191	36.8901	64.7442	43.6575	44.2663	144.324	41.0961	955.8	128.586	145.668	43.6957	72.3796	157.562	36.8765	78.9161	54.5731
F3.03.01	3	3	1	M	WT	1	244	did not replace data	0.002622	2.89331	47.5084	30.895	81.6698	15.7128	95.3174	132.203	187.066	59.8525	153.457	158.725	163.619	588.151	113.224	311.756	89.5134	356.557	56.4613	63.8247	101.19	37.2269	90.3511	218.119	39.4086	64.9942	62.2137	85.9842	102.727	97.0898	285.087	76.3374	915.687	152.268	235.763	67.8608	153.541	269.998	79.6016	181.228	100.628
F3.03.34	3	3	34	M	WT	1	181	did not replace data	0.003534	0.499616	30.3775	26.0138	52.058	17.9404	86.8037	119.291	147.659	63.1537	168.636	171.885	192.98	633.041	80.984	308.699	97.8408	326.22	73.429	73.567	90.4104	49.0375	97.5873	181.305	43.7424	78.9116	75.1429	99.8449	92.8904	90.2706	217.026	61.5069	1037.91	113.315	240.263	76.8339	129.16	249.211	76.2044	120.502	93.8421
F3.03.45	3	3	45	M	WT	1	274		0.002338	2.74725	42.7215	32.6295	68.1997	18.0248	96.9297	129.043	158.979	68.2409	151.767	180.547	169.88	609.674	75.6955	296.617	108.358	284.027	62.3077	66.0309	97.6399	45.7804	86.7488	186.057	56.2513	73.6371	71.3073	98.0951	101.958	92.184	209.054	70.4588	1118.91	137.416	278.133	76.3539	135.567	226.796	63.9266	153.313	88.3974
F3.04.01	3	4	1	M	WT	72	276		0.002318	6.33756	40.3148	41.4358	42.7883	16.0973	77.5312	101.186	86.3364	52.09	173.256	155.548	203.676	606.642	116.028	121.54	76.2296	335.548	56.7858	94.8771	142.148	101.172	94.3069	118.419	46.6182	83.1047	90.2032	41.4692	59.5759	60.3929	145.812	43.5249	6052.25	177.616	180.933	58.5627	76.0332	123.171	32.5252	84.4948	36.2991
F3.04.34	3	4	34	M	WT	72	280		0.002286	3.85356	24.8624	29.7129	34.9671	16.1478	86.1881	78.1113	140.258	47.1429	115.352	108.14	152.3	525.981	136.623	118.086	74.0396	387.036	65.2311	70.8756	104.306	81.2203	80.3977	164.103	45.1767	72.4134	63.497	44.6784	54.2796	52.2914	178.427	32.0432	3960.34	164.785	201.328	47.4602	109.896	110.65	28.2898	94.9997	25.3405
F3.04.45	3	4	45	M	WT	72	203		0.003146	3.29196	29.3098	29.6882	26.3727	9.43777	66.5799	73.5972	101.05	61.4162	145.389	129.284	178.118	664.376	95.5341	129.297	84.8063	266.681	65.0478	84.4647	123.914	68.065	78.6695	175.302	46.2865	89.1661	71.9333	54.3636	54.8255	52.227	165.52	41.508	5671.33	189.263	216.947	49.3386	88.034	94.283	24.5986	77.6163	32.3059
F3.05.01	3	5	1	M	WT	72	124		0.005156	5.60514	23.7338	20.7806	49.4158	19.2774	83.8838	92.4518	237.496	53.467	63.398	87.3004	92.5146	397.608	130.883	211.648	59.3298	281.375	22.711	27.915	79.3704	16.6145	64.6765	176.05	34.9412	57.6977	42.4732	51.1156	81.9724	69.8942	223.493	56.035	670.805	115.796	230.2	60.4948	192.304	219.183	68.9863	349.715	67.004
F3.05.34	3	5	34	M	WT	72	300		0.00213	10.2128	27.2072	28.4638	53.5109	25.2376	105.468	130.372	303.935	68.4054	95.7893	148.652	206.797	1264.04	125.026	225.54	83.0412	462.96	39.2771	58.5371	94.4131	28.2797	73.0756	284.341	69.1506	89.1064	55.1477	71.8493	94.1454	98.747	440.131	63.9446	747.892	184.738	383.26	80.7102	306.555	247.451	118.603	511.688	72.4905
F3.05.45	3	5	45	M	WT	72	125		0.005138	5.29049	24.7973	24.3353	49.2358	25.6891	122.712	113.324	338.307	71.7407	87.0563	124.418	175.783	896.547	378.79	277.255	82.9524	413.745	33.6997	38.5866	60.5845	23.6774	80.0816	175.011	47.9321	73.1792	53.0647	65.848	112.649	87.5858	396.195	68.7026	649.202	234.734	344.263	72.9732	536.337	294.163	98.9903	489.659	71.2067
F3.06.01	3	6	1	M	WT	74	214		0.00299	2.23769	29.3495	25.9649	80.6181	21.9972	94.4192	105.484	246.039	62.158	82.0104	113.219	94.6017	287.144	243.327	302.871	61.1358	317.231	37.5827	30.8736	78.2206	19.3775	65.9582	165.052	33.5748	56.2926	45.4995	54.5829	76.9532	71.6536	189.418	52.7928	899.711	124.149	198.574	50.5918	245.484	195.55	62.6291	319.084	65.138
F3.06.34	3	6	34	M	WT	74	151		0.004246	0.934579	25.3113	21.186	57.3084	11.1897	48.6745	62.1914	98.776	39.3021	63.8836	109.205	84.0149	303.925	45.597	171.796	50.4476	274.11	33.8159	24.6681	50.0768	20.5232	41.0951	86.5524	22.6559	40.5823	37.0454	30.5756	57.1513	51.8844	131.333	67.3962	783.079	55.5653	181.467	48.0442	113.746	189.52	36.6996	109.238	69.0013
F3.06.45	3	6	45	M	WT	74	256		0.002504	0.997067	25.3128	21.5374	62.4352	14.9432	59.3263	92.9177	115.46	59.0534	82.1204	118.957	106.063	371.315	58.8778	231.754	67.4422	343.757	33.1194	31.6564	44.4722	22.3624	54.4775	114.315	31.5643	48.9081	43.6282	44.8041	61.8751	62.2375	150.709	60.487	1065.75	76.1731	208.495	55.6764	115.837	227.789	54.7812	122.355	84.7678
F3.07.01	3	7	1	M	WT	74	164		0.003892	60.4868	24.8266	18.3473	45.9057	11.0086	750.094	130.367	636.912	59.8138	115.427	140.428	167.446	720.009	4264.52	1482.07	144.387	323.3	44.46	30.8139	71.6088	22.6313	52.6741	95.557	23.5464	79.2969	38.9687	67.1481	628.082	96.1811	561.733	69.8493	675.315	133.335	666.273	222.798	9530.89	1232.77	711.093	6393.12	217.088
F3.07.34	3	7	34	M	WT	74	157		0.00408	33.7893	22.0469	23.0487	60.8561	19.9642	205.973	111.298	253.778	80.9652	98.2923	124.397	157.193	766.964	742.938	353.629	77.3066	261.04	38.9787	47.5192	83.7151	27.9929	60.0874	129.865	38.511	57.4567	47.8822	92.9893	197.668	93.1755	264.341	56.2368	631.929	98.4125	219.162	86.1168	1876.17	328.358	147.246	831.918	97.4254
F3.07.45	3	7	45	M	WT	74	142		0.004504	81.457	19.2288	17.0581	51.2504	16.391	270.357	92.7805	348.086	88.3108	80.8366	100.74	134.409	864.885	1031.5	375.979	87.3613	281.951	30.1589	26.0201	66.8043	25.668	43.2407	109.267	27.2875	51.8926	39.1804	80.9238	223.608	73.0551	277.306	56.3833	622.845	69.4264	186.236	67.8664	2885.76	395.863	192.083	1484.91	89.6637
F3.08.01	3	8	1	M	WT	74	475		0.001346	36.4512	33.5968	38.9068	54.5447	31.5709	253.058	146.947	451.588	102.763	122.745	164.451	314.085	1656.37	596.534	463.128	124.594	510.131	65.3587	69.8186	162.686	48.0452	104.72	204.391	62.3897	104.88	79.4921	103.054	178.573	129.346	470.976	123.439	976.259	243.003	448.488	91.0828	950.654	347.071	168.825	1020.21	117.928
F3.08.34	3	8	34	M	WT	74	232	did not replace data	0.002754	49.1743	30.0973	38.974	110.292	70.2568	534.086	195.251	1265.98	158.293	160.222	228.004	307.11	1583.88	2484.13	1570.34	202.302	835.962	83.8041	88.7154	216.069	72.6763	116.417	480.785	79.6565	135.904	90.641	182.686	465.109	173.71	988.546	132.346	926.477	356.506	1001.87	216.002	3811.27	803.365	783.355	5412.98	242.256
F3.08.45	3	8	45	M	WT	74	207		0.003098	40.6641	31.3484	37.7863	86.5101	39.0585	359.561	195.771	548.863	115.166	158.117	202.968	384.117	2233.86	1257.92	653.225	172.386	709.89	73.5791	88.0084	190.751	58.7535	111.419	294.834	88.3626	121.397	94.6062	151.443	358.656	162.745	731.207	123.242	1005.04	270.068	606.287	169.845	2870.07	460.325	393.019	2153.66	198.125
F3.09.01	3	9	1	M	WT	75	111	did not replace data	0.005752	4.9208	23.7036	20.3915	39.6191	13.5673	57.9691	70.4255	96.508	50.4142	83.7726	94.5085	74.8858	236.251	56.3937	98.4109	54.0334	264.225	28.8171	39.2582	59.6041	33.6061	50.1334	80.448	33.9541	38.7956	39.8393	26.7264	42.6318	52.8795	137.584	51.1115	653.76	75.0342	164.778	47.2206	96.4353	138.213	39.711	79.2883	49.5259
F3.09.34	3	9	34	M	WT	75	54		0.011866	1.41844	10.0508	6.69338	12.6376	4.50369	23.405	29.642	46.2537	11.3182	23.3578	34.0436	20.8794	93.1964	30.1395	32.092	11.4551	91.7413	5.69414	8.82533	14.4091	8.06073	17.6488	21.9035	8.06084	14.2473	12.275	8.26327	14.9073	26.4751	39.0568	15.6614	267.706	23.4984	50.1681	13.9217	19.6293	64.0409	11.2921	28.2998	14.005
F3.09.45	3	9	45	M	WT	75	67		0.00951	1.82978	14.3463	10.2157	22.824	10.5948	38.049	44.0107	117.804	26.2872	46.6179	64.6241	53.3956	167.713	60.8031	74.0349	23.1906	181.403	16.4307	17.3753	26.5377	14.8046	27.7213	52.0254	17.3159	27.7695	22.0916	19.26	35.7062	38.0381	101.047	27.0375	385.53	52.4611	88.8527	26.6075	62.5946	118.383	21.4204	68.4548	27.1371
F3.10.01	3	10	1	M	WT	75	127		0.005036	75.8929	15.0643	30.486	132.587	40.7608	7336.94	1793	9152.52	805.978	556.685	0	547.355	1901.98	27577.4	17763.9	1021.74	1806.03	0	65.1983	170.237	17.8965	186.645	1573.07	208.864	556.679	177.134	725.881	6488.55	1603.6	5862.56	507.621	1566.3	161.4	4045.16	995.784	9499.24	10657.2	1244.26	78560	3146.85
F3.10.34	3	10	34	M	WT	75	119		0.005394	25.5882	28.8422	36.5098	119.023	120.941	1376.85	634.456	4820.13	725.697	150.4	131.794	167.325	942.797	2898.74	4203.81	217.065	811.999	33.313	54.7954	173.647	29.1091	70.024	1043.29	135.941	210.058	80.8493	366.823	617.587	332.2	2022.64	304.828	1010	169.666	886.119	208.829	9985.77	2456.03	1307.99	19949	722.691
F3.10.45	3	10	45	M	WT	75	170		0.003756	19.6273	21.5536	24.7546	79.6593	34.2265	1146.01	403.005	1732.37	220.586	140.844	174.637	176.584	852.814	3301.67	2162.21	216.716	464.844	60.717	51.2595	104.305	40.0484	60.9226	287.768	53.2183	174.923	65.0337	150.856	458.583	187.244	1023.19	141.634	828.642	185.49	467.576	114.821	10917.1	1437.85	1429.98	9643.05	393.582
F3.11.01	3	11	1	M	WT	75	1391		0.00046	9.21986	23.6144	31.8065	57.3473	24.0113	603.319	228.547	737.271	85.99	130.486	152.916	280.049	1704.76	1461.89	1021.31	210.175	646.263	105.526	87.0674	144.954	50.6908	97.8726	257.08	84.9516	123.414	84.3979	103.167	319.601	207.533	741.083	115.073	601.537	139.837	697.041	116.342	3152.84	676.046	776.81	4169.01	180.327
F3.11.34	3	11	34	M	WT	75	219		0.002916	24.9069	25.7196	32.1203	77.4269	40.063	4256.65	850.747	4907.48	321.838	399.107	528.934	419.955	2323.72	18653.9	9905.7	833.381	1632.69	119.593	107.112	291.311	57.6873	180.797	955.791	108.873	295.221	108.492	383.753	2834.24	646.452	3715.33	262.931	1411.69	651.767	3814.36	561.282	39213	5325.57	7809.83	41629.9	990.567
F3.11.45	3	11	45	M	WT	75	209		0.003062	11.8994	38.7278	43.3694	133.864	78.7441	2216.63	806.013	4759.39	391.659	272.721	492.157	371.56	2307.94	8133.33	8147.88	452.725	1581.36	124.381	91.3788	266.413	56.9663	160.362	1149.05	107.103	201.98	112.873	337.89	1409.14	563.057	3466.77	276.118	1145.37	519.995	2200.12	311.776	18032.3	3946.85	6444.81	34890.1	714.793
F3.12.01	3	12	1	M	WT	77	408		0.00157	3.46767	23.8387	22.205	192.78	13.4822	99.37	100.072	135.897	45.4459	161.741	126.706	160.793	499.811	52.8502	211.741	84.8222	344.236	64.7198	53.957	83.4353	49.4732	90.2978	173.782	34.5162	69.1071	65.2292	61.7317	75.0553	78.6603	146.976	73.3183	1793.7	124.665	344.161	87.1998	110.854	162.747	62.9985	115.676	86.3267
F3.12.34	3	12	34	M	WT	77	436		0.001468	5.64972	18.4337	20.9342	57.8165	11.9113	71.3779	74.2249	97.3796	38.6808	154.904	124.371	156.322	455.199	53.2303	201.413	79.3332	273.575	67.3075	48.6387	71.3912	41.8847	79.9096	171.486	36.1377	68.7131	54.2546	62.9878	65.9548	67.8552	137.724	53.9788	1969.24	129.737	275.478	71.8056	105.592	152.824	42.9349	72.9796	62.1734
F3.12.45	3	12	45	M	WT	77	292	did not replace data	0.002192	1.28901	27.7094	28.1919	106.204	18.2958	109.124	124.167	140.494	64.7831	219.949	192.499	225.642	615.82	73.8726	288.436	130.259	407.537	87.2449	84.0219	113.061	55.1022	120.074	244.419	44.2697	109.546	87.9023	112.807	112.187	90.2223	240.235	71.4934	2134.11	139.161	373.015	99.445	144.225	207.769	73.4342	120.242	83.5089
F3.13.01	3	13	1	M	WT	77	103		0.006184	78.0201	33.8541	29.0315	111.685	37.8396	7984.36	806.399	5580.87	187.535	417.589	385.599	407.8	889.44	22176.4	6406.41	912.23	923.708	78.8249	72.6651	117.315	31.6998	101.124	327.313	39.7956	554.498	116.931	444.867	5530.05	602.607	3906.95	169.97	1270.13	732.864	4486.33	1059.5	63012.9	9292.08	5866.89	37478.5	978.184
F3.13.34	3	13	34	M	WT	77	96		0.00664	5.75369	12.7321	16.3544	60.4441	21.6082	76.1215	71.4535	180.635	34.7481	61.3107	71.8836	69.6244	246.856	188.231	146.745	38.9127	175.149	19.1358	21.3839	34.713	21.1301	37.0129	61.5531	19.1118	41.2619	33.2813	50.0164	41.5476	56.8975	115.872	39.4285	406.741	43.2213	123.612	37.0034	306.901	125.221	93.8421	389.98	43.7167
F3.13.45	3	13	45	M	WT	77	92		0.00697	61.716	21.7372	22.7435	89.8949	52.9887	1427.92	250.098	1282.23	105.8	138.873	136.986	82.9605	397.754	6920.69	1779.99	196.377	417.073	35.0078	36.1431	60.3066	18.8987	58.5893	196.326	25.6296	110.16	53.7886	91.4127	1191.05	200.672	969.123	70.1698	477.814	165.719	719.568	135.443	13207.9	1781.97	1801.92	7869.46	240.927
F3.14.01	3	14	1	M	WT	77	104		0.006174	46.9191	40.0657	47.9288	200.198	83.5589	2598.95	652.051	3800.98	306.31	279.532	373.431	349.008	2125.24	7509.26	3906.42	475.622	1264.81	108.942	86.1378	293.577	48.4312	130.216	720.54	120.385	276.364	107.889	314.228	1530.22	435.531	2441.31	197.084	1404.61	434.585	1691.57	247.327	19874	2706.52	4349.96	21500.3	635.454
F3.14.34	3	14	34	M	WT	77	109		0.005848	3.64903	21.3517	22.8178	66.1756	39.5414	369.528	164.005	813.53	89.5517	95.4212	135.148	192.394	936.539	972.653	710.051	128.482	476.058	41.2101	49.2954	89.9656	31.0599	85.5766	269.826	57.8967	73.2951	52.7331	105.28	228.026	128.506	562.547	72.2756	700.582	153.815	351.98	68.6473	2506.92	561.413	669.067	3270.22	128.58
F3.14.45	3	14	45	M	WT	77	137		0.004688	4.6129	19.6312	26.167	92.2506	50.7383	625.296	238.793	1407.9	128.728	107.951	179.119	206.636	1176.39	1848.18	1370.11	165.8	681.479	53.9893	49.2331	129.055	29.9315	89.0867	421.611	64.2729	95.1183	54.5516	126.235	390.563	152.764	849.604	101.155	740.559	255.638	485.907	80.4727	4594.94	919.258	1189.61	6613.97	220.622
F3.15.01	3	15	1	M	WT	98	71	did not replace data	0.009064	1.16356	14.517	15.105	29.5779	9.36552	58.9051	80.8088	131.258	22.7887	88.5031	95.2922	86.4728	387.025	39.6758	104.71	61.0751	217.644	22.6835	29.0253	59.1547	20.8141	39.6628	67.9522	17.0674	37.775	35.5233	42.6196	59.4747	47.8092	105.28	50.9346	603.367	62.399	147.398	46.5139	78.7541	172.017	28.2008	64.9769	39.8881
F3.15.34	3	15	34	M	WT	98	57		0.01116	2.36872	11.6085	12.9002	20.7308	7.72311	42.5565	74.2183	85.6498	22.6112	73.2197	66.5001	85.0289	330.76	36.0576	85.7143	42.6803	286.599	23.4416	27.7316	42.0918	26.4701	35.8191	61.0435	24.68	31.7248	27.2133	26.4965	43.2442	42.6339	86.4698	55.6605	516.155	57.7833	116.14	41.3411	49.124	116.099	29.3603	82.8556	34.2235
F3.15.45	3	15	45	M	WT	98	52		0.012322	1.1497	14.301	16.9745	51.379	12.4979	47.8297	91.1059	89.7885	46.1956	79.6868	65.5292	76.9596	361.985	42.1833	84.8798	55.2963	346.31	27.8348	27.2751	45.6192	20.1396	43.8798	51.3744	15.1946	28.6135	34.6531	32.6145	42.9965	49.6322	110.513	54.7819	535.224	53.8081	139.643	40.4076	52.5057	112.244	27.8446	66.3185	25.9058
F3.16.01	3	16	1	M	WT	98	120		0.005322	16.4214	32.7403	28.9393	111.298	53.1859	3908.31	451.114	3416.58	311.335	401.168	381.142	414.024	1173.48	10704	3155.95	797.084	900.336	100.461	138.264	287.868	47.3216	121.85	459.79	64.9954	446.162	109.94	333.801	2457.7	316.771	1988.84	137.829	1645.08	387.542	1150.75	229.667	27357.5	3003.22	2373.23	15769	562.32
F3.16.34	3	16	34	M	WT	98	79		0.00814	73.6467	26.9978	29.0895	121.839	55.1532	4116.81	1206.27	8462.5	608.975	243.032	502.231	221.228	1000.55	7982.57	6863.99	595.22	1461.26	134.48	104.882	518.749	53.6832	97.0354	1262.09	97.8718	344.399	135.297	643.62	2243.85	723.494	4580.07	309.618	2528.7	920.141	3044.97	639.778	25280.5	6350.54	7438.44	44674.4	1951.34
F3.16.45	3	16	45	M	WT	98	146		0.004374	82.0775	31.7695	34.2186	121.984	37.9231	6491.54	1356.85	7501.46	586.974	523.119	584.51	384.696	1350.58	14350.9	7728.45	989.63	1514.25	129.89	158.859	438.151	63.5082	120.133	947.641	100.596	590.451	210.628	618.541	3742.88	860.016	4534.35	321.082	2663.43	710.191	3039.43	627.705	40549.2	7190.27	8506.43	43424.9	2105.32
F3.17.01	3	17	1	M	WT	98	153		0.00418	3.99419	19.0237	21.4792	48.1975	36.2091	187.63	121.353	757.638	97.8736	102.507	133.702	109.224	530.725	309.591	294.054	99.66	570.904	44.5475	49.3148	127.773	27.2157	93.6193	237.948	43.319	92.5936	55.0706	102.939	136.732	90.7899	360.954	112.002	605.885	135.483	365.508	67.0764	693.246	310.641	229.129	1125.01	94.9936
F3.17.34	3	17	34	M	WT	98	83		0.007732	2.07647	13.5884	14.6719	36.5582	27.579	135.895	87.5353	501.411	64.576	61.0551	85.1683	95.2167	491.984	201.752	208.354	79.0627	547.67	30.6891	36.0115	62.2893	15.3602	57.0859	208.785	52.7793	60.3066	36.4734	56.0098	80.3741	74.3189	329.329	55.283	407.689	90.7028	278.474	47.7542	505.481	261.644	153.043	870.771	58.7039
F3.17.45	3	17	45	M	WT	98	116		0.005508	1.22041	15.4154	15.4118	63.4482	49.1728	164.766	134.547	1196.79	124.284	76.1915	144.71	133.744	798.778	249.441	380.348	84.5123	777.154	57.5121	49.3707	90.4056	25.0463	53.4087	417.085	74.9621	72.7976	49.7886	87.4286	95.0123	81.6165	473.864	97.9709	555.677	164.828	451.042	71.3857	598.831	324.195	266.943	1689.43	100.509
[truncated: 317 more columns]

## Sheet: Table S2
Table S2. Statistically significant pairwise comparisons of lipid levels and ion leakage between treatments at particular time points in wild-type Arabidopsis rosettes. Adjusted p value (based on Benjamini and Hochberg [56] false discovery rate) of less than 0.05 was considered a significant difference for the indicated comparison. The adjusted p values in Column G were used to label Figures S2 t…
Lipid number	Lipid name	Time (h)	Comparison	Estimated difference	p value for two-sided H1 from Tukey's pairwise comparison	Adjusted p value, based on Benjamini and Hochberg (1995) false discovery rate
lipid0283	DG 16:0_18:3*	1	acclimated - control	0.2653	2.16e-05	0.0154572
lipid0284	DG 18:3_18:3*	1	acclimated - control	0.3794	3.43e-08	2.46e-05
lipid0834	MGDG 9:1;O2_16:3*	1	acclimated - control	-0.3247	7.53e-06	0.00539842
lipid0831	MGDG 9:1;O_16:3*	1	acclimated - control	-0.4689	1.57e-05	0.0112468
lipid0421	PC 18:3;O3_18:2*	1	acclimated - control	-0.328	4.89e-07	0.000350959
lipid0628	PC 18:2_18:3;O*	1	acclimated - control	-0.256	9.93e-07	0.00071192
lipid0429	PE 18:2;O_18:3	1	acclimated - control	-0.2508	8.67e-06	0.00621687
lipid0505	MGDG-O(FA 18:3) 36:6 or MGDG-O(FA 18:3) 34:8;O2	72	acclimated - control	1.2963	0	0
lipid0580	MGDG-O(FA 18:3;O2) 36:8;O2	72	acclimated - control	0.3784	3.8e-08	2.72e-05
lipid0535	MGDG-O(FA 18:4;O) 34:8;O2 (Arabidopside E or MGDG-O(FA 18:4;O) 36:6)	72	acclimated - control	0.8466	9.16e-06	0.00656865
lipid0286	DG 18:3_18:1**	72	acclimated - control	0.547	4.54e-06	0.00325213
lipid0175	DGDG 38:4 or DGDG 36:6;O2	72	acclimated - control	0.2902	6.19e-07	0.000444077
lipid0174	DGDG 38:5 or DGDG 36:7;O2	72	acclimated - control	0.2161	1.46e-07	0.000104972
lipid0173	DGDG 38:6 or DGDG 36:8;O2	72	acclimated - control	0.2159	1.09e-07	7.83e-05
lipid0157	DGMG 16:0	72	acclimated - control	0.7258	0	0
lipid0156	DGMG 16:3	72	acclimated - control	0.654	2.49e-06	0.0017874
lipid0257	Sitosterol-Hex 16:0	72	acclimated - control	-0.6392	1.15e-05	0.00827541
lipid0256	Stigmasterol-Hex 16:0	72	acclimated - control	-0.5059	1.95e-09	1.4e-06
lipid0637	MGDG 18:3_16:3;O*	72	acclimated - control	0.3013	1.15e-05	0.0082581
lipid0143	MGDG 34:3	72	acclimated - control	-0.323	0	0
lipid0141	MGDG 34:5	72	acclimated - control	-0.3806	3.44e-13	2.46e-10
lipid0148	MGDG 36:4 or MGDG 34:6;O2	72	acclimated - control	-0.3465	7.56e-10	5.42e-07
lipid0147	MGDG 36:5 or MGDG 34:7;O2	72	acclimated - control	-0.5059	0	0
lipid0121	PA 34:6	72	acclimated - control	1.3236	7.09e-06	0.0050859
lipid0841	PC 32:1	72	acclimated - control	-0.5529	0	0
lipid0840	PC 32:3	72	acclimated - control	-0.3572	0	0
lipid0842	PC 34:6	72	acclimated - control	-0.35	4.28e-09	3.07e-06
lipid0040	PC 36:2	72	acclimated - control	-0.2837	3.14e-13	2.25e-10
lipid0039	PC 36:3	72	acclimated - control	-0.2071	2.61e-06	0.00187159
lipid0043	PC 38:5	72	acclimated - control	0.2609	5.08e-14	3.65e-11
lipid0042	PC 38:6	72	acclimated - control	0.2877	9.51e-07	0.000681646
lipid0049	PC 40:3*	72	acclimated - control	0.3397	2.2e-08	1.57e-05
lipid0075	PE 40:3	72	acclimated - control	0.529	8.46e-08	6.06e-05
lipid0008	PG 32:0	72	acclimated - control	-0.315	5.45e-10	3.91e-07
lipid0007	PG 32:1	72	acclimated - control	-0.2591	2.71e-14	1.94e-11
lipid0011	PG 34:2	72	acclimated - control	0.1454	1.88e-09	1.35e-06
lipid0010	PG 34:3	72	acclimated - control	0.1216	3.28e-07	0.000235251
lipid0021	PG 34:4;O	72	acclimated - control	0.4075	8.28e-12	5.94e-09
lipid0017	PG 36:3	72	acclimated - control	0.1614	4.35e-05	0.0312108
lipid0016	PG 36:4	72	acclimated - control	0.3834	0	0
lipid0015	PG 36:5	72	acclimated - control	0.5437	0	0
lipid0014	PG 36:6	72	acclimated - control	0.285	5.49e-11	3.93e-08
lipid0095	PS 34:3	72	acclimated - control	-0.3555	0	0
lipid0276	TG 18:3_34:2*	72	acclimated - control	0.792	9.41e-14	6.75e-11
lipid0298	TrGDG 36:6	72	acclimated - control	1.4734	8.26e-13	5.92e-10
lipid0473	MGDG-O(FA 16:0) 34:6	74	acclimated - control	1.7037	5.59e-11	4.01e-08
lipid0459	MGDG-O(FA 16:2) 34:6	74	acclimated - control	1.2237	9.83e-06	0.00704625
lipid0461	MGDG-O(FA 16:2) 36:6 or MGDG-O(FA 16:2) 34:8;O2	74	acclimated - control	1.8188	0	0
lipid0448	MGDG-O(FA 16:3) 34:6	74	acclimated - control	2.3387	2.94e-06	0.00210446
lipid0496	MGDG-O(FA 16:3;O) 34:6	74	acclimated - control	1.0418	1.37e-07	9.81e-05
lipid0498	MGDG-O(FA 16:3;O) 34:8;O2 or MGDG-O(FA 16:3;O) 36:6	74	acclimated - control	1.2249	1.78e-11	1.28e-08
lipid0500	MGDG-O(FA 16:3;O) 36:8;O2	74	acclimated - control	0.9448	1.1e-08	7.89e-06
lipid0487	MGDG-O(FA 16:4;O) 34:7;O	74	acclimated - control	0.5031	1.96e-05	0.0140615
lipid0495	MGDG-O(FA 16:4;O) 36:8;O2	74	acclimated - control	0.7109	6.32e-07	0.000453287
lipid0519	MGDG-O(FA 16:3;O2) 34:6 or MGDG-O(FA 18:1) 34:6	74	acclimated - control	1.0171	1.67e-06	0.00119754
lipid0522	MGDG-O(FA 16:3;O2) 36:6 or MGDG-O(FA 16:3;O2) 34:8;O2 or MGDG-O(FA 18:1) 36:6 or MGDG-O(FA 18:1) 34:8;O2	74	acclimated - control	0.7681	1.54e-08	1.1e-05
lipid0525	MGDG-O(FA 16:3;O2) 36:8;O2 or MGDG-O(FA 18:1) 36:8;O2	74	acclimated - control	0.8243	1.52e-07	0.000109081
lipid0514	MGDG-O(FA 18:2) 34:6	74	acclimated - control	1.7183	1.83e-06	0.00131071
lipid0551	MGDG-O(FA 18:2;O) 36:6 or MGDG-O(FA 18:2;O) 34:8;O2	74	acclimated - control	0.8816	1.84e-07	0.000132015
lipid0553	MGDG-O(FA 18:2;O) 36:8;O2	74	acclimated - control	0.8492	3.94e-08	2.83e-05
lipid0501	MGDG-O(FA 18:3) 34:6	74	acclimated - control	2.8287	2.4e-11	1.72e-08
lipid0503	MGDG-O(FA 18:3) 34:7;O	74	acclimated - control	1.597	3.61e-12	2.58e-09
lipid0505	MGDG-O(FA 18:3) 36:6 or MGDG-O(FA 18:3) 34:8;O2	74	acclimated - control	2.2136	4.1e-06	0.00294305
lipid0512	MGDG-O(FA 18:3) 36:8;O2	74	acclimated - control	1.2446	7.22e-07	0.000518023
lipid0580	MGDG-O(FA 18:3;O2) 36:8;O2	74	acclimated - control	0.8904	4.1e-06	0.00293904
lipid0591	MGDG-O(FA 18:3;O3) 34:6	74	acclimated - control	0.8847	2.25e-07	0.000161587
lipid0546	MGDG-O(FA 18:3;O) 36:6;O	74	acclimated - control	0.5753	4.29e-05	0.0307935
lipid0548	MGDG-O(FA 18:3;O) 36:8;O2	74	acclimated - control	0.811	5.66e-05	0.0405857
lipid0565	MGDG-O(FA 18:4;O2) 36:8;O2	74	acclimated - control	0.6153	5.76e-05	0.0413
lipid0558	MGDG-O(FA 18:5;O2) 36:8;O2	74	acclimated - control	0.7097	1.77e-05	0.012697
lipid0293	PG-O(FA 16:1) 36:8;O2**	74	acclimated - control	0.5855	6.36e-08	4.56e-05
lipid0287	Campesterol 18:3**	74	acclimated - control	0.939	4.5e-09	3.23e-06
lipid0825	Campesterol 18:4;O**	74	acclimated - control	1.008	2.34e-05	0.0167562
lipid0282	DG 16:1_18:3**	74	acclimated - control	0.8262	1.52e-14	1.09e-11
lipid0281	DG 18:3_16:3**	74	acclimated - control	3.0806	0	0
lipid0284	DG 18:3_18:3*	74	acclimated - control	1.1356	0	0
lipid0336	DGDG 18:3_16:4;O*	74	acclimated - control	0.5897	1.44e-10	1.03e-07
lipid0339	DGDG 18:3;O_16:4;O**	74	acclimated - control	0.4153	3.2e-06	0.00229633
lipid0394	DGDG 18:3;O2_16:3*	74	acclimated - control	1.803	5.56e-08	3.99e-05
lipid0400	DGDG 18:3;O2_18:3 or DGDG 18:4;O_18:2;O**	74	acclimated - control	1.1683	9.19e-08	6.59e-05
lipid0392	DGDG 16:0_18:4;O*	74	acclimated - control	1.9199	2.77e-06	0.00198953
lipid0387	DGDG 18:4;O_16:3*	74	acclimated - control	1.607	3.87e-12	2.78e-09
lipid0390	DGDG 18:4;O_16:3;O*	74	acclimated - control	0.5568	2.55e-05	0.0182693
lipid0396	DGDG 18:4;O_18:3	74	acclimated - control	2.9534	2.92e-05	0.0209114
lipid0399	DGDG 18:4;O_18:3;O**	74	acclimated - control	1.3521	1.37e-10	9.81e-08
lipid0402	DGDG 18:4;O_18:4;O2 or DGDG 18:4;O_20:2*	74	acclimated - control	0.7118	6.55e-07	0.000469497
lipid0398	DGDG 18:4;O_18:4;O (Arabidopside D)*	74	acclimated - control	2.4008	0	0
lipid0258	Campesterol-Hex 18:3	74	acclimated - control	0.6301	2.69e-07	0.000192803
lipid0816	Campesterol-Hex 18:4;O	74	acclimated - control	0.8994	1.86e-05	0.0133023
lipid0025	LPC 16:0	74	acclimated - control	1.7211	5.51e-05	0.0395073
lipid0029	LPC 18:0**	74	acclimated - control	1.112	0	0
lipid0028	LPC 18:1*	74	acclimated - control	0.9863	0	0
lipid0027	LPC 18:2	74	acclimated - control	1.3211	0	0
lipid0026	LPC 18:3	74	acclimated - control	1.1847	0	0
lipid0052	LPE 16:0	74	acclimated - control	1.1521	5.89e-09	4.22e-06
lipid0055	LPE 18:1*	74	acclimated - control	1.0372	4.55e-05	0.0326553
lipid0054	LPE 18:2	74	acclimated - control	1.2963	4.44e-13	3.18e-10
lipid0053	LPE 18:3	74	acclimated - control	1.054	3.03e-08	2.17e-05
lipid0001	LPG 16:1	74	acclimated - control	1.4073	8.35e-11	5.98e-08
lipid0792	LPI 16:0	74	acclimated - control	0.8594	1.43e-07	0.000102422
lipid0793	LPI 18:3	74	acclimated - control	1.2613	2.7e-05	0.0193759
lipid0796	LPS 16:0**	74	acclimated - control	0.5421	7.66e-12	5.49e-09
lipid0318	MGDG 18:3;O3_16:3**	74	acclimated - control	0.8074	9.05e-07	0.000648565
lipid0317	MGDG 18:4;O3_16:3**	74	acclimated - control	1.0362	4.13e-07	0.000295989
lipid0327	MGDG 18:3_16:3;O2*	74	acclimated - control	0.9719	3.48e-06	0.00249337
lipid0323	MGDG 18:3_16:4;O	74	acclimated - control	2.0571	0	0
lipid0325	MGDG 18:4;O_16:4;O (16:4;O as fragment; Arabidopside A)	74	acclimated - control	3.6701	0	0
lipid0435	MGDG 18:2;O_16:3*	74	acclimated - control	0.6744	1.8e-05	0.0129018
lipid0837	MGDG 18:3_7:1;O*	74	acclimated - control	1.3964	4.89e-06	0.00350301
lipid0370	MGDG 18:3;O2_16:3*	74	acclimated - control	1.1668	1.4e-14	1e-11
lipid0623	MGDG 18:3;O_16:3*	74	acclimated - control	0.8529	6.24e-10	4.47e-07
lipid0358	MGDG 18:4;O_16:3	74	acclimated - control	1.2524	1.78e-15	1.27e-12
lipid0362	MGDG 18:4;O_16:3;O*	74	acclimated - control	1.0301	2.17e-09	1.55e-06
lipid0361	MGDG 18:4;O_16:4;O (18:4;O as fragment; Arabidopside A)	74	acclimated - control	1.6282	0	0
lipid0372	MGDG 18:4;O_18:3	74	acclimated - control	2.3584	0	0
lipid0384	MGDG 18:4;O_18:4;O3 or MGDG 18:4;O_19:3;O2**	74	acclimated - control	1.7828	1.15e-05	0.0082492
lipid0375	MGDG 18:4;O_18:4;O (Arabidopside B)*	74	acclimated - control	2.5728	4.12e-12	2.95e-09
lipid0148	MGDG 36:4 or MGDG 34:6;O2	74	acclimated - control	-0.4649	2.07e-09	1.49e-06
lipid0147	MGDG 36:5 or MGDG 34:7;O2	74	acclimated - control	-0.7015	0	0
lipid0152	MGDG 38:6 or MGDG 36:8;O2	74	acclimated - control	0.9697	5.29e-09	3.79e-06
lipid0132	MGMG 16:3	74	acclimated - control	0.818	0	0
lipid0126	PA 34:1	74	acclimated - control	1.6065	2.25e-09	1.61e-06
lipid0125	PA 34:2	74	acclimated - control	2.2587	0	0
lipid0124	PA 34:3	74	acclimated - control	2.2766	0	0
lipid0123	PA 34:4	74	acclimated - control	2.0533	2.93e-07	0.000209911
lipid0122	PA 34:5*	74	acclimated - control	2.1985	0	0
lipid0121	PA 34:6	74	acclimated - control	3.8541	0	0
lipid0131	PA 36:2	74	acclimated - control	1.821	0	0
lipid0130	PA 36:3	74	acclimated - control	2.2836	0	0
lipid0129	PA 36:4	74	acclimated - control	2.7473	0	0
lipid0128	PA 36:5	74	acclimated - control	2.8953	0	0
lipid0127	PA 36:6	74	acclimated - control	2.9008	0	0
lipid0379	PC 18:2_18:3;O2*	74	acclimated - control	0.6457	2.05e-10	1.47e-07
lipid0378	PC 18:3_18:3;O2*	74	acclimated - control	0.7694	2.43e-09	1.74e-06
lipid0842	PC 34:6	74	acclimated - control	1.1895	1.54e-05	0.0110067
lipid0075	PE 40:3	74	acclimated - control	0.6382	4.79e-08	3.43e-05
lipid0079	PE 42:2	74	acclimated - control	0.4705	2.18e-06	0.00155979
lipid0078	PE 42:3 (measured in positive mode)	74	acclimated - control	0.8551	8.88e-16	6.37e-13
lipid0357	PG 18:4;O_16:0	74	acclimated - control	1.4743	1.72e-09	1.24e-06
lipid0356	PG 18:4;O_16:1	74	acclimated - control	2.0748	0	0
lipid0363	PG 18:4;O_18:3*	74	acclimated - control	0.9233	9.71e-10	6.96e-07
lipid0021	PG 34:4;O	74	acclimated - control	0.4907	1.5e-05	0.010761
lipid0821	Sitosterol 18:2*	74	acclimated - control	0.6718	3.55e-05	0.0254846
lipid0289	Sitosterol 18:3*	74	acclimated - control	0.7021	4.16e-07	0.000298466
lipid0177	SQMG 16:0	74	acclimated - control	0.7978	4.13e-05	0.0296291
lipid0178	SQMG 18:3	74	acclimated - control	0.8514	2.26e-05	0.0162019
lipid0826	Stigmasterol 18:4;O**	74	acclimated - control	0.96	0	0
lipid0305	TeGDG 34:6	74	acclimated - control	4.02	0	0
lipid0309	TeGDG 36:6	74	acclimated - control	1.9897	2.72e-12	1.95e-09
lipid0294	TrGDG 34:6	74	acclimated - control	4.7479	0	0
lipid0298	TrGDG 36:6	74	acclimated - control	2.6567	8.29e-06	0.00594658
lipid0473	MGDG-O(FA 16:0) 34:6	74	non-acclimated - control	2.6859	0	0
lipid0476	MGDG-O(FA 16:0) 36:6 or MGDG-O(FA 16:0) 34:8;O2	74	non-acclimated - control	1.7526	3.4e-06	0.00243506
lipid0459	MGDG-O(FA 16:2) 34:6	74	non-acclimated - control	1.1794	1.89e-05	0.0135522
lipid0461	MGDG-O(FA 16:2) 36:6 or MGDG-O(FA 16:2) 34:8;O2	74	non-acclimated - control	1.0471	2.8e-11	2.01e-08
lipid0448	MGDG-O(FA 16:3) 34:6	74	non-acclimated - control	4.101	0	0
lipid0454	MGDG-O(FA 16:3) 36:6 or MGDG-O(FA 16:3) 34:8;O2	74	non-acclimated - control	2.421	3.89e-07	0.000278884
lipid0519	MGDG-O(FA 16:3;O2) 34:6 or MGDG-O(FA 18:1) 34:6	74	non-acclimated - control	1.2496	8.43e-10	6.04e-07
lipid0514	MGDG-O(FA 18:2) 34:6	74	non-acclimated - control	2.873	2.22e-16	1.59e-13
lipid0516	MGDG-O(FA 18:2) 36:6 or MGDG-O(FA 18:2) 34:8;O2	74	non-acclimated - control	1.5559	4.17e-07	0.00029878
lipid0551	MGDG-O(FA 18:2;O) 36:6 or MGDG-O(FA 18:2;O) 34:8;O2	74	non-acclimated - control	0.8535	2.43e-07	0.000173998
lipid0553	MGDG-O(FA 18:2;O) 36:8;O2	74	non-acclimated - control	1.1322	9.99e-15	7.16e-12
lipid0501	MGDG-O(FA 18:3) 34:6	74	non-acclimated - control	4.5893	0	0
lipid0503	MGDG-O(FA 18:3) 34:7;O	74	non-acclimated - control	2.1947	0	0
lipid0506	MGDG-O(FA 18:3) 34:7;O2 or MGDG-O(FA 18:3) 36:5	74	non-acclimated - control	1.9892	6.2e-10	4.45e-07
lipid0505	MGDG-O(FA 18:3) 36:6 or MGDG-O(FA 18:3) 34:8;O2	74	non-acclimated - control	3.4268	7.16e-14	5.13e-11
lipid0508	MGDG-O(FA 18:3) 36:7;O	74	non-acclimated - control	1.3368	2.56e-08	1.83e-05
lipid0512	MGDG-O(FA 18:3) 36:8;O2	74	non-acclimated - control	1.7437	1.14e-12	8.16e-10
lipid0546	MGDG-O(FA 18:3;O) 36:6;O	74	non-acclimated - control	0.5905	1.17e-05	0.00838434
lipid0282	DG 16:1_18:3**	74	non-acclimated - control	0.699	3.4e-11	2.44e-08
lipid0281	DG 18:3_16:3**	74	non-acclimated - control	3.2017	0	0
lipid0284	DG 18:3_18:3*	74	non-acclimated - control	1.1391	0	0
lipid0392	DGDG 16:0_18:4;O*	74	non-acclimated - control	1.7095	3.54e-05	0.0253859
lipid0387	DGDG 18:4;O_16:3*	74	non-acclimated - control	1.1261	1.71e-06	0.00122249
lipid0396	DGDG 18:4;O_18:3	74	non-acclimated - control	2.8836	2.03e-05	0.0145316
lipid0402	DGDG 18:4;O_18:4;O2 or DGDG 18:4;O_20:2*	74	non-acclimated - control	0.6928	7.78e-07	0.000557574
lipid0398	DGDG 18:4;O_18:4;O (Arabidopside D)*	74	non-acclimated - control	2.0443	0	0
lipid0157	DGMG 16:0	74	non-acclimated - control	1.4062	1.47e-05	0.0105361
lipid0159	DGMG 18:3	74	non-acclimated - control	2.0548	1.69e-12	1.21e-09
lipid0258	Campesterol-Hex 18:3	74	non-acclimated - control	0.5988	6.69e-07	0.000479722
lipid0260	Sitosterol-Hex 18:3	74	non-acclimated - control	0.7211	3.71e-06	0.00265924
lipid0025	LPC 16:0	74	non-acclimated - control	1.9212	5.03e-06	0.00360587
lipid0029	LPC 18:0**	74	non-acclimated - control	1.1955	0	0
lipid0028	LPC 18:1*	74	non-acclimated - control	0.8953	0	0
lipid0027	LPC 18:2	74	non-acclimated - control	1.1696	5.55e-16	3.98e-13
lipid0026	LPC 18:3	74	non-acclimated - control	0.9724	1.04e-14	7.48e-12
lipid0052	LPE 16:0	74	non-acclimated - control	0.966	1.27e-06	0.000912264
lipid0054	LPE 18:2	74	non-acclimated - control	0.7931	2.12e-05	0.0151736
lipid0001	LPG 16:1	74	non-acclimated - control	1.3462	3e-10	2.15e-07
lipid0323	MGDG 18:3_16:4;O	74	non-acclimated - control	2.0159	0	0
lipid0325	MGDG 18:4;O_16:4;O (16:4;O as fragment; Arabidopside A)	74	non-acclimated - control	3.3002	0	0
lipid0370	MGDG 18:3;O2_16:3*	74	non-acclimated - control	0.8949	1.96e-09	1.41e-06
lipid0358	MGDG 18:4;O_16:3	74	non-acclimated - control	1.2168	2.22e-16	1.59e-13
lipid0361	MGDG 18:4;O_16:4;O (18:4;O as fragment; Arabidopside A)	74	non-acclimated - control	1.2559	3.23e-14	2.32e-11
lipid0372	MGDG 18:4;O_18:3	74	non-acclimated - control	2.5421	0	0
lipid0375	MGDG 18:4;O_18:4;O (Arabidopside B)*	74	non-acclimated - control	2.437	3.32e-11	2.38e-08
lipid0152	MGDG 38:6 or MGDG 36:8;O2	74	non-acclimated - control	0.9056	2.52e-08	1.81e-05
lipid0132	MGMG 16:3	74	non-acclimated - control	0.5641	3.2e-10	2.3e-07
lipid0126	PA 34:1	74	non-acclimated - control	2.1911	1.11e-16	7.96e-14
lipid0125	PA 34:2	74	non-acclimated - control	3.0454	0	0
lipid0124	PA 34:3	74	non-acclimated - control	3.1314	0	0
lipid0123	PA 34:4	74	non-acclimated - control	3.1046	7.77e-16	5.57e-13
lipid0122	PA 34:5*	74	non-acclimated - control	2.2166	0	0
lipid0121	PA 34:6	74	non-acclimated - control	3.459	0	0
lipid0131	PA 36:2	74	non-acclimated - control	2.7026	0	0
lipid0130	PA 36:3	74	non-acclimated - control	2.9549	0	0
lipid0129	PA 36:4	74	non-acclimated - control	3.3433	0	0
lipid0128	PA 36:5	74	non-acclimated - control	3.5822	0	0
lipid0127	PA 36:6	74	non-acclimated - control	3.7745	0	0
lipid0035	PC 34:1	74	non-acclimated - control	-0.7205	1.56e-06	0.0011157
lipid0050	PC 40:2*	74	non-acclimated - control	-0.5531	3.74e-06	0.00268413
lipid0049	PC 40:3*	74	non-acclimated - control	-0.6864	2.55e-07	0.000182563
lipid0048	PC 40:4*	74	non-acclimated - control	-0.6734	1.21e-06	0.000868628
lipid0047	PC 40:5*	74	non-acclimated - control	-0.6286	8.11e-06	0.00581607
lipid0356	PG 18:4;O_16:1	74	non-acclimated - control	1.5134	0	0
lipid0363	PG 18:4;O_18:3*	74	non-acclimated - control	0.6915	5.81e-06	0.00416751
lipid0115	PS 42:3	74	non-acclimated - control	-0.4601	9.53e-07	0.000683149
lipid0305	TeGDG 34:6	74	non-acclimated - control	2.8927	0	0
lipid0309	TeGDG 36:6	74	non-acclimated - control	1.2847	1.09e-05	0.00781473
lipid0294	TrGDG 34:6	74	non-acclimated - control	3.9771	0	0
lipid0461	MGDG-O(FA 16:2) 36:6 or MGDG-O(FA 16:2) 34:8;O2	74	non-acclimated - acclimated	-0.7717	3.57e-06	0.0025562
lipid0498	MGDG-O(FA 16:3;O) 34:8;O2 or MGDG-O(FA 16:3;O) 36:6	74	non-acclimated - acclimated	-0.8099	1.78e-05	0.0127734
lipid0495	MGDG-O(FA 16:4;O) 36:8;O2	74	non-acclimated - acclimated	-0.5941	4.98e-05	0.035736
lipid0522	MGDG-O(FA 16:3;O2) 36:6 or MGDG-O(FA 16:3;O2) 34:8;O2 or MGDG-O(FA 18:1) 36:6 or MGDG-O(FA 18:1) 34:8;O2	74	non-acclimated - acclimated	-0.5973	1.96e-05	0.0140475
lipid0575	MGDG-O(FA 18:4;O) 36:7;O2 (alternative fragmentation)	74	non-acclimated - acclimated	-1.1562	1.19e-09	8.54e-07
lipid0570	MGDG-O(FA 18:3;O2) 36:6 or MGDG-O(FA 18:3;O2) 34:8;O2	74	non-acclimated - acclimated	-0.8533	5.8e-07	0.000415691
lipid0293	PG-O(FA 16:1) 36:8;O2**	74	non-acclimated - acclimated	-0.4738	2.22e-05	0.0159335
lipid0837	MGDG 18:3_7:1;O*	74	non-acclimated - acclimated	-1.3372	1.45e-05	0.0104261
lipid0147	MGDG 36:5 or MGDG 34:7;O2	74	non-acclimated - acclimated	0.5134	3.61e-13	2.59e-10
lipid0125	PA 34:2	74	non-acclimated - acclimated	0.7867	6.37e-08	4.56e-05
lipid0124	PA 34:3	74	non-acclimated - acclimated	0.8548	2.84e-08	2.03e-05
lipid0131	PA 36:2	74	non-acclimated - acclimated	0.8815	2.69e-09	1.93e-06
lipid0130	PA 36:3	74	non-acclimated - acclimated	0.6712	4.35e-06	0.00312067
lipid0128	PA 36:5	74	non-acclimated - acclimated	0.6869	6.7e-05	0.0480095
lipid0067	PE 36:4	74	non-acclimated - acclimated	-0.6058	5.04e-05	0.0361459
lipid0066	PE 36:5	74	non-acclimated - acclimated	-0.6889	6.55e-07	0.000469497
lipid0065	PE 36:6	74	non-acclimated - acclimated	-0.8568	2.55e-11	1.83e-08
lipid0073	PE 38:4	74	non-acclimated - acclimated	-0.487	5.11e-05	0.0366149
lipid0072	PE 38:5	74	non-acclimated - acclimated	-0.6013	2.11e-08	1.51e-05
lipid0079	PE 42:2	74	non-acclimated - acclimated	-0.4294	1.86e-05	0.0133614
lipid0078	PE 42:3 (measured in positive mode)	74	non-acclimated - acclimated	-0.7112	4.85e-11	3.48e-08
lipid0021	PG 34:4;O	74	non-acclimated - acclimated	-0.4562	6.25e-05	0.0447859
lipid0826	Stigmasterol 18:4;O**	74	non-acclimated - acclimated	-0.8914	0	0
lipid0601	DGDG-O(FA 18:4;O) 36:6 or DGDG-O(FA 18:4;O) 34:8;O2	75	acclimated - control	1.6147	9.37e-10	6.72e-07
lipid0603	DGDG-O(FA 18:4;O) 36:8;O2	75	acclimated - control	1.9738	5.6e-13	4.02e-10
lipid0473	MGDG-O(FA 16:0) 34:6	75	acclimated - control	3.8949	0	0
lipid0474	MGDG-O(FA 16:0) 34:7;O	75	acclimated - control	2.4281	0	0
lipid0476	MGDG-O(FA 16:0) 36:6 or MGDG-O(FA 16:0) 34:8;O2	75	acclimated - control	3.886	0	0
lipid0483	MGDG-O(FA 16:0) 36:8;O2	75	acclimated - control	2.5583	0	0
lipid0464	MGDG-O(FA 16:1) 34:6	75	acclimated - control	1.4837	1.11e-16	7.96e-14
lipid0459	MGDG-O(FA 16:2) 34:6	75	acclimated - control	1.7438	2.62e-12	1.88e-09
lipid0461	MGDG-O(FA 16:2) 36:6 or MGDG-O(FA 16:2) 34:8;O2	75	acclimated - control	2.02	0	0
lipid0448	MGDG-O(FA 16:3) 34:6	75	acclimated - control	5.0209	0	0
lipid0454	MGDG-O(FA 16:3) 36:6 or MGDG-O(FA 16:3) 34:8;O2	75	acclimated - control	4.0643	0	0
lipid0496	MGDG-O(FA 16:3;O) 34:6	75	acclimated - control	1.2583	1.84e-09	1.32e-06
lipid0498	MGDG-O(FA 16:3;O) 34:8;O2 or MGDG-O(FA 16:3;O) 36:6	75	acclimated - control	1.7495	2.7e-08	1.94e-05
lipid0500	MGDG-O(FA 16:3;O) 36:8;O2	75	acclimated - control	1.1513	2.13e-06	0.0015269
lipid0487	MGDG-O(FA 16:4;O) 34:7;O	75	acclimated - control	1.2989	7.45e-09	5.34e-06
lipid0489	MGDG-O(FA 16:4;O) 34:8;O2 or MGDG-O(FA 16:4;O) 36:6	75	acclimated - control	2.2398	8.4e-06	0.00602368
lipid0495	MGDG-O(FA 16:4;O) 36:8;O2	75	acclimated - control	1.5526	2.43e-07	0.00017425
lipid0526	MGDG-O(FA 18:0) 34:6	75	acclimated - control	1.9866	0	0
lipid0527	MGDG-O(FA 18:0) 34:7;O	75	acclimated - control	1.207	1.44e-15	1.03e-12
lipid0528	MGDG-O(FA 18:0) 34:8;O2 or MGDG-O(FA 18:0) 36:6	75	acclimated - control	2.2688	3.73e-14	2.67e-11
lipid0519	MGDG-O(FA 16:3;O2) 34:6 or MGDG-O(FA 18:1) 34:6	75	acclimated - control	2.4872	0	0
lipid0522	MGDG-O(FA 16:3;O2) 36:6 or MGDG-O(FA 16:3;O2) 34:8;O2 or MGDG-O(FA 18:1) 36:6 or MGDG-O(FA 18:1) 34:8;O2	75	acclimated - control	1.9272	7.44e-15	5.33e-12
lipid0516	MGDG-O(FA 18:2) 36:6 or MGDG-O(FA 18:2) 34:8;O2	75	acclimated - control	3.0332	1.03e-14	7.4e-12
lipid0518	MGDG-O(FA 18:2) 36:8;O2	75	acclimated - control	1.5861	6.33e-15	4.54e-12
lipid0596	MGDG-O(FA 18:2;O3) 36:6 or MGDG-O(FA 18:2;O3) 34:8;O2	75	acclimated - control	1.7113	3.86e-07	0.000276954
lipid0551	MGDG-O(FA 18:2;O) 36:6 or MGDG-O(FA 18:2;O) 34:8;O2	75	acclimated - control	2.5952	0	0
lipid0553	MGDG-O(FA 18:2;O) 36:8;O2	75	acclimated - control	1.9747	0	0
lipid0501	MGDG-O(FA 18:3) 34:6	75	acclimated - control	5.52	0	0
lipid0503	MGDG-O(FA 18:3) 34:7;O	75	acclimated - control	4.8016	0	0
lipid0506	MGDG-O(FA 18:3) 34:7;O2 or MGDG-O(FA 18:3) 36:5	75	acclimated - control	2.975	4.55e-15	3.26e-12
lipid0505	MGDG-O(FA 18:3) 36:6 or MGDG-O(FA 18:3) 34:8;O2	75	acclimated - control	5.7461	0	0
lipid0508	MGDG-O(FA 18:3) 36:7;O	75	acclimated - control	3.024	0	0
lipid0512	MGDG-O(FA 18:3) 36:8;O2	75	acclimated - control	3.6662	0	0
lipid0566	MGDG-O(FA 18:3;O2) 34:6	75	acclimated - control	1.9304	9.61e-13	6.89e-10
lipid0575	MGDG-O(FA 18:4;O) 36:7;O2 (alternative fragmentation)	75	acclimated - control	0.9097	3.07e-06	0.00219773
lipid0574	MGDG-O(FA 18:4;O) 36:8;O2 (alternative fragmentation; Arabidopside G)	75	acclimated - control	3.8257	0	0
lipid0570	MGDG-O(FA 18:3;O2) 36:6 or MGDG-O(FA 18:3;O2) 34:8;O2	75	acclimated - control	1.9338	5.11e-15	3.66e-12
lipid0580	MGDG-O(FA 18:3;O2) 36:8;O2	75	acclimated - control	2.2921	3.67e-10	2.63e-07
lipid0591	MGDG-O(FA 18:3;O3) 34:6	75	acclimated - control	1.2683	1.5e-06	0.00107545
lipid0592	MGDG-O(FA 18:3;O3) 34:7;O	75	acclimated - control	1.1125	2.54e-09	1.82e-06
lipid0595	MGDG-O(FA 18:3;O3) 36:8;O2	75	acclimated - control	1.2368	3.1e-12	2.22e-09
lipid0543	MGDG-O(FA 18:3;O) 34:7;O	75	acclimated - control	0.9781	1.93e-06	0.00138121
lipid0544	MGDG-O(FA 18:3;O) 36:6 or MGDG-O(FA 18:3;O) 34:8;O2	75	acclimated - control	1.9563	2.93e-07	0.000209945
lipid0548	MGDG-O(FA 18:3;O) 36:8;O2	75	acclimated - control	1.4109	4.28e-06	0.00306733
lipid0559	MGDG-O(FA 18:4;O2) 34:6	75	acclimated - control	1.8083	4.97e-12	3.56e-09
lipid0560	MGDG-O(FA 18:4;O2) 34:7;O	75	acclimated - control	1.0522	7.91e-09	5.67e-06
lipid0561	MGDG-O(FA 18:4;O2) 36:6 or MGDG-O(FA 18:4;O2) 34:8;O2	75	acclimated - control	2.655	0	0
lipid0565	MGDG-O(FA 18:4;O2) 36:8;O2	75	acclimated - control	1.4566	1.91e-11	1.37e-08
lipid0586	MGDG-O(FA 18:4;O3) 34:6	75	acclimated - control	1.4185	4.2e-07	0.000301087
lipid0587	MGDG-O(FA 18:4;O3) 34:7;O	75	acclimated - control	1.3677	1.83e-10	1.31e-07
lipid0588	MGDG-O(FA 18:4;O3) 36:6 or MGDG-O(FA 18:4;O3) 34:8;O2	75	acclimated - control	2.4603	8.15e-10	5.84e-07
lipid0532	MGDG-O(FA 18:4;O) 34:6	75	acclimated - control	1.4695	6.43e-08	4.61e-05
lipid0533	MGDG-O(FA 18:4;O) 34:7;O	75	acclimated - control	2.8969	0	0
lipid0535	MGDG-O(FA 18:4;O) 34:8;O2 (Arabidopside E or MGDG-O(FA 18:4;O) 36:6)	75	acclimated - control	4.5805	0	0
lipid0537	MGDG-O(FA 18:4;O) 36:7;O	75	acclimated - control	1.7279	1.54e-08	1.11e-05
lipid0540	MGDG-O(FA 18:4;O) 36:8;O2 (Arabidopside G)	75	acclimated - control	3.843	0	0
lipid0541	MGDG-O(FA 18:4;O) 38:4 or MGDG-O(FA 18:4;O) 36:6;O2	75	acclimated - control	1.4656	7.17e-10	5.14e-07
lipid0556	MGDG-O(FA 18:5;O2) 36:6 or MGDG-O(FA 18:5;O2) 34:8;O2	75	acclimated - control	2.0503	4.16e-06	0.00298514
lipid0558	MGDG-O(FA 18:5;O2) 36:8;O2	75	acclimated - control	1.3515	5.08e-08	3.64e-05
lipid0293	PG-O(FA 16:1) 36:8;O2**	75	acclimated - control	1.5602	9.01e-06	0.00645688
lipid0825	Campesterol 18:4;O**	75	acclimated - control	1.0102	2.91e-11	2.09e-08
lipid0283	DG 16:0_18:3*	75	acclimated - control	0.5165	0	0
lipid0282	DG 16:1_18:3**	75	acclimated - control	0.99	8.66e-09	6.21e-06
lipid0281	DG 18:3_16:3**	75	acclimated - control	2.4674	0	0
lipid0286	DG 18:3_18:1**	75	acclimated - control	0.5366	3.35e-05	0.0240108
lipid0285	DG 18:2_18:3*	75	acclimated - control	0.7463	0	0
lipid0284	DG 18:3_18:3*	75	acclimated - control	0.9846	0	0
lipid0396	DGDG 18:4;O_18:3	75	acclimated - control	2.4818	1.1e-10	7.88e-08
lipid0399	DGDG 18:4;O_18:3;O**	75	acclimated - control	1.2661	5.55e-08	3.98e-05
lipid0398	DGDG 18:4;O_18:4;O (Arabidopside D)*	75	acclimated - control	2.7202	3.67e-10	2.63e-07
lipid0157	DGMG 16:0	75	acclimated - control	1.3621	1.57e-06	0.00112586
lipid0160	DGMG 18:4;O	75	acclimated - control	1.3401	3.47e-06	0.00248697
lipid0255	Campesterol-Hex 16:0	75	acclimated - control	0.8925	9.69e-07	0.000694683
lipid0258	Campesterol-Hex 18:3	75	acclimated - control	0.9879	1.02e-05	0.00729847
lipid0816	Campesterol-Hex 18:4;O	75	acclimated - control	1.0585	5.22e-08	3.74e-05
lipid0257	Sitosterol-Hex 16:0	75	acclimated - control	1.0963	5.68e-06	0.00407568
Ion Leakage	Ion Leakage	75	acclimated - control	2.3721	1.97e-07	0.000141573
lipid0001	LPG 16:1	75	acclimated - control	1.0877	1.76e-06	0.00125987
lipid0793	LPI 18:3	75	acclimated - control	0.8671	3.65e-11	2.62e-08
lipid0318	MGDG 18:3;O3_16:3**	75	acclimated - control	0.4984	3.24e-05	0.0232151
lipid0323	MGDG 18:3_16:4;O	75	acclimated - control	1.5163	3.76e-06	0.00269314
lipid0325	MGDG 18:4;O_16:4;O (16:4;O as fragment; Arabidopside A)	75	acclimated - control	2.797	2.8e-10	2.01e-07
lipid0837	MGDG 18:3_7:1;O*	75	acclimated - control	0.9871	1.06e-08	7.59e-06
lipid0372	MGDG 18:4;O_18:3	75	acclimated - control	2.2271	1.69e-08	1.21e-05
lipid0138	MGDG 30:6;O	75	acclimated - control	1.2732	1.97e-12	1.41e-09
lipid0126	PA 34:1	75	acclimated - control	2.0494	2.96e-08	2.12e-05
lipid0125	PA 34:2	75	acclimated - control	2.0918	7.81e-10	5.6e-07
lipid0124	PA 34:3	75	acclimated - control	2.0414	4.27e-09	3.06e-06
lipid0121	PA 34:6	75	acclimated - control	3.4483	1.89e-05	0.0135282
lipid0131	PA 36:2	75	acclimated - control	1.946	5.48e-09	3.93e-06
lipid0130	PA 36:3	75	acclimated - control	2.1258	1.98e-08	1.42e-05
lipid0129	PA 36:4	75	acclimated - control	2.4432	2.1e-13	1.51e-10
lipid0128	PA 36:5	75	acclimated - control	2.5132	3.59e-14	2.57e-11
lipid0127	PA 36:6	75	acclimated - control	2.4966	5.42e-13	3.89e-10
lipid0842	PC 34:6	75	acclimated - control	2.3455	5.58e-11	4e-08
lipid0078	PE 42:3 (measured in positive mode)	75	acclimated - control	0.8621	1.93e-05	0.013863
lipid0357	PG 18:4;O_16:0	75	acclimated - control	1.5288	5.51e-06	0.00395291
lipid0356	PG 18:4;O_16:1	75	acclimated - control	2.2115	7.83e-08	5.62e-05
lipid0827	Sitosterol 18:4;O**	75	acclimated - control	0.8854	2.05e-05	0.0147136
lipid0826	Stigmasterol 18:4;O**	75	acclimated - control	1.3721	9.4e-13	6.74e-10
lipid0280	TG 18:2_36:5	75	acclimated - control	1.292	8.25e-06	0.00591749
lipid0305	TeGDG 34:6	75	acclimated - control	3.9426	2.16e-12	1.55e-09
lipid0309	TeGDG 36:6	75	acclimated - control	2.3122	3.74e-10	2.68e-07
lipid0294	TrGDG 34:6	75	acclimated - control	5.0355	0	0
lipid0298	TrGDG 36:6	75	acclimated - control	3.6679	0	0
lipid0601	DGDG-O(FA 18:4;O) 36:6 or DGDG-O(FA 18:4;O) 34:8;O2	75	non-acclimated - control	1.3399	5.96e-07	0.000427277
lipid0603	DGDG-O(FA 18:4;O) 36:8;O2	75	non-acclimated - control	1.4572	1.67e-07	0.000119992
lipid0473	MGDG-O(FA 16:0) 34:6	75	non-acclimated - control	4.8128	0	0
lipid0474	MGDG-O(FA 16:0) 34:7;O	75	non-acclimated - control	2.8305	0	0
lipid0476	MGDG-O(FA 16:0) 36:6 or MGDG-O(FA 16:0) 34:8;O2	75	non-acclimated - control	4.3265	0	0
lipid0483	MGDG-O(FA 16:0) 36:8;O2	75	non-acclimated - control	2.8375	0	0
lipid0464	MGDG-O(FA 16:1) 34:6	75	non-acclimated - control	1.9397	0	0
lipid0459	MGDG-O(FA 16:2) 34:6	75	non-acclimated - control	2.0324	7.77e-16	5.57e-13
lipid0461	MGDG-O(FA 16:2) 36:6 or MGDG-O(FA 16:2) 34:8;O2	75	non-acclimated - control	1.5857	1.32e-12	9.45e-10
lipid0448	MGDG-O(FA 16:3) 34:6	75	non-acclimated - control	6.0318	0	0
lipid0454	MGDG-O(FA 16:3) 36:6 or MGDG-O(FA 16:3) 34:8;O2	75	non-acclimated - control	4.6452	0	0
lipid0496	MGDG-O(FA 16:3;O) 34:6	75	non-acclimated - control	0.8646	5.55e-05	0.0398275
lipid0487	MGDG-O(FA 16:4;O) 34:7;O	75	non-acclimated - control	1.1127	1.42e-06	0.00101627
lipid0489	MGDG-O(FA 16:4;O) 34:8;O2 or MGDG-O(FA 16:4;O) 36:6	75	non-acclimated - control	2.0666	3.4e-05	0.0243437
lipid0495	MGDG-O(FA 16:4;O) 36:8;O2	75	non-acclimated - control	1.3638	7.18e-06	0.005147
lipid0526	MGDG-O(FA 18:0) 34:6	75	non-acclimated - control	2.7923	0	0
lipid0527	MGDG-O(FA 18:0) 34:7;O	75	non-acclimated - control	1.2671	0	0
lipid0528	MGDG-O(FA 18:0) 34:8;O2 or MGDG-O(FA 18:0) 36:6	75	non-acclimated - control	2.6336	0	0
lipid0519	MGDG-O(FA 16:3;O2) 34:6 or MGDG-O(FA 18:1) 34:6	75	non-acclimated - control	2.8879	0	0
lipid0522	MGDG-O(FA 16:3;O2) 36:6 or MGDG-O(FA 16:3;O2) 34:8;O2 or MGDG-O(FA 18:1) 36:6 or MGDG-O(FA 18:1) 34:8;O2	75	non-acclimated - control	1.6575	1.81e-11	1.3e-08
lipid0516	MGDG-O(FA 18:2) 36:6 or MGDG-O(FA 18:2) 34:8;O2	75	non-acclimated - control	3.3958	0	0
lipid0518	MGDG-O(FA 18:2) 36:8;O2	75	non-acclimated - control	1.7423	0	0
lipid0596	MGDG-O(FA 18:2;O3) 36:6 or MGDG-O(FA 18:2;O3) 34:8;O2	75	non-acclimated - control	1.4012	5.24e-05	0.0375799
lipid0551	MGDG-O(FA 18:2;O) 36:6 or MGDG-O(FA 18:2;O) 34:8;O2	75	non-acclimated - control	2.7305	0	0
lipid0553	MGDG-O(FA 18:2;O) 36:8;O2	75	non-acclimated - control	2.5031	0	0
lipid0501	MGDG-O(FA 18:3) 34:6	75	non-acclimated - control	6.4156	0	0
lipid0503	MGDG-O(FA 18:3) 34:7;O	75	non-acclimated - control	5.0205	0	0
lipid0506	MGDG-O(FA 18:3) 34:7;O2 or MGDG-O(FA 18:3) 36:5	75	non-acclimated - control	3.7821	0	0
lipid0505	MGDG-O(FA 18:3) 36:6 or MGDG-O(FA 18:3) 34:8;O2	75	non-acclimated - control	6.229	0	0
lipid0508	MGDG-O(FA 18:3) 36:7;O	75	non-acclimated - control	3.7463	0	0
lipid0512	MGDG-O(FA 18:3) 36:8;O2	75	non-acclimated - control	4.0038	0	0
lipid0566	MGDG-O(FA 18:3;O2) 34:6	75	non-acclimated - control	1.7025	4.61e-10	3.3e-07
lipid0574	MGDG-O(FA 18:4;O) 36:8;O2 (alternative fragmentation; Arabidopside G)	75	non-acclimated - control	3.6062	0	0
lipid0570	MGDG-O(FA 18:3;O2) 36:6 or MGDG-O(FA 18:3;O2) 34:8;O2	75	non-acclimated - control	1.4586	6.63e-09	4.75e-06
lipid0580	MGDG-O(FA 18:3;O2) 36:8;O2	75	non-acclimated - control	1.997	5.89e-08	4.23e-05
lipid0591	MGDG-O(FA 18:3;O3) 34:6	75	non-acclimated - control	1.6874	7.33e-11	5.25e-08
lipid0592	MGDG-O(FA 18:3;O3) 34:7;O	75	non-acclimated - control	1.1297	1.47e-09	1.05e-06
lipid0595	MGDG-O(FA 18:3;O3) 36:8;O2	75	non-acclimated - control	1.0802	1.52e-09	1.09e-06
lipid0543	MGDG-O(FA 18:3;O) 34:7;O	75	non-acclimated - control	1.0412	2.97e-07	0.000212618
lipid0544	MGDG-O(FA 18:3;O) 36:6 or MGDG-O(FA 18:3;O) 34:8;O2	75	non-acclimated - control	1.9654	2.12e-07	0.00015226
lipid0546	MGDG-O(FA 18:3;O) 36:6;O	75	non-acclimated - control	1.4919	1.46e-09	1.05e-06
lipid0548	MGDG-O(FA 18:3;O) 36:8;O2	75	non-acclimated - control	1.4807	2.38e-06	0.00170781
lipid0559	MGDG-O(FA 18:4;O2) 34:6	75	non-acclimated - control	2.2683	0	0
lipid0560	MGDG-O(FA 18:4;O2) 34:7;O	75	non-acclimated - control	0.8669	2.1e-06	0.00150315
lipid0561	MGDG-O(FA 18:4;O2) 36:6 or MGDG-O(FA 18:4;O2) 34:8;O2	75	non-acclimated - control	2.4868	0	0
lipid0565	MGDG-O(FA 18:4;O2) 36:8;O2	75	non-acclimated - control	1.2443	2.37e-08	1.7e-05
lipid0587	MGDG-O(FA 18:4;O3) 34:7;O	75	non-acclimated - control	1.2432	1.3e-08	9.32e-06
lipid0588	MGDG-O(FA 18:4;O3) 36:6 or MGDG-O(FA 18:4;O3) 34:8;O2	75	non-acclimated - control	2.2383	3.17e-08	2.27e-05
lipid0532	MGDG-O(FA 18:4;O) 34:6	75	non-acclimated - control	1.5533	1.92e-08	1.38e-05
lipid0533	MGDG-O(FA 18:4;O) 34:7;O	75	non-acclimated - control	2.8399	0	0
lipid0535	MGDG-O(FA 18:4;O) 34:8;O2 (Arabidopside E or MGDG-O(FA 18:4;O) 36:6)	75	non-acclimated - control	4.0186	0	0
lipid0537	MGDG-O(FA 18:4;O) 36:7;O	75	non-acclimated - control	1.6918	2.65e-08	1.9e-05
lipid0540	MGDG-O(FA 18:4;O) 36:8;O2 (Arabidopside G)	75	non-acclimated - control	3.6233	0	0
lipid0541	MGDG-O(FA 18:4;O) 38:4 or MGDG-O(FA 18:4;O) 36:6;O2	75	non-acclimated - control	1.0032	5.84e-05	0.0419081
lipid0558	MGDG-O(FA 18:5;O2) 36:8;O2	75	non-acclimated - control	1.0555	3.47e-05	0.0248699
lipid0293	PG-O(FA 16:1) 36:8;O2**	75	non-acclimated - control	1.4602	3.42e-05	0.0245533
lipid0283	DG 16:0_18:3*	75	non-acclimated - control	0.3959	4.35e-13	3.12e-10
lipid0282	DG 16:1_18:3**	75	non-acclimated - control	1.1961	1.92e-12	1.38e-09
lipid0281	DG 18:3_16:3**	75	non-acclimated - control	2.8497	0	0
lipid0285	DG 18:2_18:3*	75	non-acclimated - control	0.4913	0	0
lipid0284	DG 18:3_18:3*	75	non-acclimated - control	1.0359	0	0
lipid0400	DGDG 18:3;O2_18:3 or DGDG 18:4;O_18:2;O**	75	non-acclimated - control	1.1074	4.02e-05	0.028836
lipid0396	DGDG 18:4;O_18:3	75	non-acclimated - control	2.6534	4.04e-12	2.89e-09
lipid0399	DGDG 18:4;O_18:3;O**	75	non-acclimated - control	1.3869	1.65e-09	1.18e-06
lipid0402	DGDG 18:4;O_18:4;O2 or DGDG 18:4;O_20:2*	75	non-acclimated - control	1.729	1.65e-07	0.00011863
lipid0398	DGDG 18:4;O_18:4;O (Arabidopside D)*	75	non-acclimated - control	2.5731	3.85e-09	2.76e-06
lipid0157	DGMG 16:0	75	non-acclimated - control	1.4848	1.32e-07	9.44e-05
lipid0159	DGMG 18:3	75	non-acclimated - control	1.6661	6.01e-05	0.0430801
lipid0255	Campesterol-Hex 16:0	75	non-acclimated - control	0.9515	1.24e-07	8.91e-05
lipid0258	Campesterol-Hex 18:3	75	non-acclimated - control	1.43	3.04e-11	2.18e-08
lipid0257	Sitosterol-Hex 16:0	75	non-acclimated - control	1.1578	1.46e-06	0.00104656
lipid0260	Sitosterol-Hex 18:3	75	non-acclimated - control	1.6444	7.92e-09	5.68e-06
Ion Leakage	Ion Leakage	75	non-acclimated - control	3.3081	1.31e-13	9.39e-11
lipid0323	MGDG 18:3_16:4;O	75	non-acclimated - control	1.601	9.5e-07	0.000681392
lipid0325	MGDG 18:4;O_16:4;O (16:4;O as fragment; Arabidopside A)	75	non-acclimated - control	2.419	6.62e-08	4.75e-05
lipid0372	MGDG 18:4;O_18:3	75	non-acclimated - control	2.5075	2.01e-10	1.44e-07
lipid0126	PA 34:1	75	non-acclimated - control	2.6814	1.38e-13	9.89e-11
lipid0125	PA 34:2	75	non-acclimated - control	2.9698	0	0
lipid0124	PA 34:3	75	non-acclimated - control	2.9165	0	0
lipid0131	PA 36:2	75	non-acclimated - control	2.7581	0	0
lipid0130	PA 36:3	75	non-acclimated - control	2.712	2.22e-13	1.59e-10
lipid0129	PA 36:4	75	non-acclimated - control	3.0529	0	0
lipid0128	PA 36:5	75	non-acclimated - control	3.1785	0	0
lipid0127	PA 36:6	75	non-acclimated - control	3.1914	0	0
lipid0046	PC 38:2	75	non-acclimated - control	-0.8988	4.14e-05	0.0296687
lipid0047	PC 40:5*	75	non-acclimated - control	-0.9774	2.68e-05	0.0192271
lipid0357	PG 18:4;O_16:0	75	non-acclimated - control	1.3964	5.2e-05	0.0372483
lipid0356	PG 18:4;O_16:1	75	non-acclimated - control	2.1407	1.84e-07	0.000131693
lipid0115	PS 42:3	75	non-acclimated - control	-0.8261	6.97e-07	0.000499838
lipid0305	TeGDG 34:6	75	non-acclimated - control	2.8674	3.84e-07	0.000275037
lipid0309	TeGDG 36:6	75	non-acclimated - control	1.7924	5.2e-07	0.000372686
lipid0294	TrGDG 34:6	75	non-acclimated - control	4.0135	1.95e-12	1.4e-09
lipid0298	TrGDG 36:6	75	non-acclimated - control	3.0326	0	0
lipid0285	DG 18:2_18:3*	75	non-acclimated - acclimated	-0.255	5.18e-08	3.72e-05
lipid0793	LPI 18:3	75	non-acclimated - acclimated	-0.6016	8.55e-06	0.00612973
lipid0837	MGDG 18:3_7:1;O*	75	non-acclimated - acclimated	-0.8406	1.55e-06	0.00111211
lipid0138	MGDG 30:6;O	75	non-acclimated - acclimated	-0.8976	8.59e-07	0.000615731
lipid0047	PC 40:5*	75	non-acclimated - acclimated	-0.9642	3.78e-05	0.0270684
lipid0066	PE 36:5	75	non-acclimated - acclimated	-0.9656	1.21e-05	0.00865975
lipid0065	PE 36:6	75	non-acclimated - acclimated	-1.1275	1.68e-09	1.21e-06
lipid0072	PE 38:5	75	non-acclimated - acclimated	-0.9016	6.79e-05	0.0487187
lipid0078	PE 42:3 (measured in positive mode)	75	non-acclimated - acclimated	-0.9744	7.54e-07	0.000540952
lipid0603	DGDG-O(FA 18:4;O) 36:8;O2	77	acclimated - control	1.6947	3.66e-06	0.00262426
lipid0473	MGDG-O(FA 16:0) 34:6	77	acclimated - control	3.4876	5.55e-12	3.98e-09
lipid0474	MGDG-O(FA 16:0) 34:7;O	77	acclimated - control	1.9555	6.18e-06	0.00443277
lipid0476	MGDG-O(FA 16:0) 36:6 or MGDG-O(FA 16:0) 34:8;O2	77	acclimated - control	3.6659	7.22e-15	5.17e-12
lipid0461	MGDG-O(FA 16:2) 36:6 or MGDG-O(FA 16:2) 34:8;O2	77	acclimated - control	1.2154	6.86e-05	0.049207
lipid0448	MGDG-O(FA 16:3) 34:6	77	acclimated - control	4.5982	0	0
lipid0454	MGDG-O(FA 16:3) 36:6 or MGDG-O(FA 16:3) 34:8;O2	77	acclimated - control	3.3005	8.09e-09	5.8e-06
lipid0522	MGDG-O(FA 16:3;O2) 36:6 or MGDG-O(FA 16:3;O2) 34:8;O2 or MGDG-O(FA 18:1) 36:6 or MGDG-O(FA 18:1) 34:8;O2	77	acclimated - control	1.1851	7.12e-07	0.000510415
lipid0514	MGDG-O(FA 18:2) 34:6	77	acclimated - control	3.4565	3.08e-08	2.21e-05
lipid0515	MGDG-O(FA 18:2) 34:7;O	77	acclimated - control	1.9658	8.1e-06	0.00580493
lipid0516	MGDG-O(FA 18:2) 36:6 or MGDG-O(FA 18:2) 34:8;O2	77	acclimated - control	2.3477	8.19e-14	5.87e-11
lipid0551	MGDG-O(FA 18:2;O) 36:6 or MGDG-O(FA 18:2;O) 34:8;O2	77	acclimated - control	1.5829	2.67e-06	0.00191631
lipid0501	MGDG-O(FA 18:3) 34:6	77	acclimated - control	5.3879	0	0
lipid0503	MGDG-O(FA 18:3) 34:7;O	77	acclimated - control	4.6541	2.05e-12	1.47e-09
lipid0506	MGDG-O(FA 18:3) 34:7;O2 or MGDG-O(FA 18:3) 36:5	77	acclimated - control	2.9077	2.07e-13	1.48e-10
lipid0505	MGDG-O(FA 18:3) 36:6 or MGDG-O(FA 18:3) 34:8;O2	77	acclimated - control	5.3362	0	0
lipid0508	MGDG-O(FA 18:3) 36:7;O	77	acclimated - control	2.5	1.41e-06	0.00100947
lipid0512	MGDG-O(FA 18:3) 36:8;O2	77	acclimated - control	3.2007	4.55e-11	3.26e-08
lipid0574	MGDG-O(FA 18:4;O) 36:8;O2 (alternative fragmentation; Arabidopside G)	77	acclimated - control	3.7535	4.27e-13	3.06e-10
lipid0544	MGDG-O(FA 18:3;O) 36:6 or MGDG-O(FA 18:3;O) 34:8;O2	77	acclimated - control	1.8052	2.58e-10	1.85e-07
lipid0561	MGDG-O(FA 18:4;O2) 36:6 or MGDG-O(FA 18:4;O2) 34:8;O2	77	acclimated - control	2.2871	9.8e-09	7.03e-06
lipid0533	MGDG-O(FA 18:4;O) 34:7;O	77	acclimated - control	2.4888	1.46e-06	0.00104737
lipid0535	MGDG-O(FA 18:4;O) 34:8;O2 (Arabidopside E or MGDG-O(FA 18:4;O) 36:6)	77	acclimated - control	4.5642	0	0
lipid0540	MGDG-O(FA 18:4;O) 36:8;O2 (Arabidopside G)	77	acclimated - control	4.0753	1.35e-07	9.69e-05
lipid0556	MGDG-O(FA 18:5;O2) 36:6 or MGDG-O(FA 18:5;O2) 34:8;O2	77	acclimated - control	1.5878	6.01e-05	0.0431014
lipid0293	PG-O(FA 16:1) 36:8;O2**	77	acclimated - control	1.3118	5.03e-06	0.00360895
lipid0281	DG 18:3_16:3**	77	acclimated - control	1.7014	0	0
lipid0284	DG 18:3_18:3*	77	acclimated - control	0.7585	6.07e-06	0.00435546
lipid0396	DGDG 18:4;O_18:3	77	acclimated - control	1.7185	1.78e-10	1.28e-07
lipid0398	DGDG 18:4;O_18:4;O (Arabidopside D)*	77	acclimated - control	1.7525	0	0
lipid0164	DGDG 34:3	77	acclimated - control	-0.6938	6.74e-06	0.00483079
lipid0170	DGDG 36:3	77	acclimated - control	-0.6562	1.5e-06	0.00107427
lipid0168	DGDG 36:5	77	acclimated - control	-0.5169	2.06e-05	0.0147721
lipid0157	DGMG 16:0	77	acclimated - control	1.0061	1.61e-08	1.15e-05
lipid0158	DGMG 16:4;O	77	acclimated - control	1.3669	1.69e-08	1.21e-05
lipid0255	Campesterol-Hex 16:0	77	acclimated - control	0.8276	1.41e-06	0.00101296
lipid0258	Campesterol-Hex 18:3	77	acclimated - control	0.794	1.79e-05	0.0128205
lipid0257	Sitosterol-Hex 16:0	77	acclimated - control	0.835	1.39e-06	0.000994169
lipid0259	Stigmasterol-Hex 18:3	77	acclimated - control	0.7612	1.76e-05	0.0126199
Ion Leakage	Ion Leakage	77	acclimated - control	2.4689	2.31e-06	0.00165827
lipid0052	LPE 16:0	77	acclimated - control	1.093	9.95e-11	7.14e-08
lipid0055	LPE 18:1*	77	acclimated - control	0.8187	9.31e-07	0.000667602
lipid0054	LPE 18:2	77	acclimated - control	0.6966	1.17e-05	0.00838944
lipid0325	MGDG 18:4;O_16:4;O (16:4;O as fragment; Arabidopside A)	77	acclimated - control	1.9204	5.27e-06	0.00377937
lipid0372	MGDG 18:4;O_18:3	77	acclimated - control	1.3623	1.4e-09	1e-06
lipid0143	MGDG 34:3	77	acclimated - control	-1.0071	6.16e-09	4.42e-06
lipid0142	MGDG 34:4	77	acclimated - control	-1.0251	8.76e-07	0.000627768
lipid0141	MGDG 34:5	77	acclimated - control	-1.0792	5.58e-07	0.000400183
lipid0149	MGDG 36:3	77	acclimated - control	-0.7653	5.34e-07	0.000383178
lipid0148	MGDG 36:4 or MGDG 34:6;O2	77	acclimated - control	-0.987	5.68e-11	4.08e-08
lipid0147	MGDG 36:5 or MGDG 34:7;O2	77	acclimated - control	-1.1187	7.4e-12	5.31e-09
lipid0146	MGDG 36:6 or MGDG 34:8;O2	77	acclimated - control	-0.8978	4.43e-07	0.000317742
lipid0125	PA 34:2	77	acclimated - control	1.6072	4.17e-10	2.99e-07
lipid0124	PA 34:3	77	acclimated - control	1.6372	8.05e-12	5.77e-09
lipid0123	PA 34:4	77	acclimated - control	2.6897	1.96e-05	0.0140541
lipid0122	PA 34:5*	77	acclimated - control	2.0953	7.13e-13	5.11e-10
lipid0121	PA 34:6	77	acclimated - control	3.233	0	0
lipid0131	PA 36:2	77	acclimated - control	2.1086	2.26e-09	1.62e-06
lipid0130	PA 36:3	77	acclimated - control	1.5975	1.13e-06	0.00081195
lipid0129	PA 36:4	77	acclimated - control	1.8987	3.76e-05	0.0269863
lipid0128	PA 36:5	77	acclimated - control	1.9905	1.14e-13	8.18e-11
lipid0127	PA 36:6	77	acclimated - control	2.108	0	0
lipid0035	PC 34:1	77	acclimated - control	-0.7299	6.24e-06	0.00447398
lipid0842	PC 34:6	77	acclimated - control	2.1232	0	0
lipid0040	PC 36:2	77	acclimated - control	-0.7901	1.8e-07	0.000129288
lipid0039	PC 36:3	77	acclimated - control	-0.7143	3.46e-06	0.00248183
lipid0356	PG 18:4;O_16:1	77	acclimated - control	1.4233	2.56e-07	0.000183291
lipid0095	PS 34:3	77	acclimated - control	-0.9494	4.25e-07	0.000304654
lipid0116	PS 42:2	77	acclimated - control	-0.8857	2.83e-12	2.03e-09
lipid0115	PS 42:3	77	acclimated - control	-0.7842	1.47e-06	0.001054
lipid0826	Stigmasterol 18:4;O**	77	acclimated - control	0.5809	5.2e-05	0.0373074
lipid0280	TG 18:2_36:5	77	acclimated - control	1.7869	0	0
lipid0278	TG 18:3_36:5	77	acclimated - control	1.8592	6e-15	4.3e-12
lipid0277	TG 18:3_36:6	77	acclimated - control	2.0796	2.91e-08	2.08e-05
lipid0305	TeGDG 34:6	77	acclimated - control	4.2904	0	0
lipid0309	TeGDG 36:6	77	acclimated - control	1.8978	3.73e-11	2.68e-08
lipid0294	TrGDG 34:6	77	acclimated - control	5.474	0	0
lipid0298	TrGDG 36:6	77	acclimated - control	3.2403	0	0
lipid0603	DGDG-O(FA 18:4;O) 36:8;O2	77	non-acclimated - control	1.5784	2.83e-05	0.0203011
lipid0473	MGDG-O(FA 16:0) 34:6	77	non-acclimated - control	4.4217	0	0
lipid0474	MGDG-O(FA 16:0) 34:7;O	77	non-acclimated - control	2.2526	1.19e-07	8.54e-05
lipid0476	MGDG-O(FA 16:0) 36:6 or MGDG-O(FA 16:0) 34:8;O2	77	non-acclimated - control	4.06	0	0
lipid0448	MGDG-O(FA 16:3) 34:6	77	non-acclimated - control	5.6556	0	0
lipid0454	MGDG-O(FA 16:3) 36:6 or MGDG-O(FA 16:3) 34:8;O2	77	non-acclimated - control	3.8297	1.16e-11	8.35e-09
lipid0528	MGDG-O(FA 18:0) 34:8;O2 or MGDG-O(FA 18:0) 36:6	77	non-acclimated - control	1.915	8.11e-06	0.00581525
lipid0519	MGDG-O(FA 16:3;O2) 34:6 or MGDG-O(FA 18:1) 34:6	77	non-acclimated - control	2.4491	5.65e-07	0.000405325
lipid0522	MGDG-O(FA 16:3;O2) 36:6 or MGDG-O(FA 16:3;O2) 34:8;O2 or MGDG-O(FA 18:1) 36:6 or MGDG-O(FA 18:1) 34:8;O2	77	non-acclimated - control	1.1123	3.74e-06	0.00268235
lipid0514	MGDG-O(FA 18:2) 34:6	77	non-acclimated - control	4.4906	4.15e-13	2.98e-10
lipid0515	MGDG-O(FA 18:2) 34:7;O	77	non-acclimated - control	2.3021	4.22e-07	0.000302442
lipid0516	MGDG-O(FA 18:2) 36:6 or MGDG-O(FA 18:2) 34:8;O2	77	non-acclimated - control	2.7872	0	0
lipid0596	MGDG-O(FA 18:2;O3) 36:6 or MGDG-O(FA 18:2;O3) 34:8;O2	77	non-acclimated - control	1.038	7.95e-07	0.00056968
lipid0551	MGDG-O(FA 18:2;O) 36:6 or MGDG-O(FA 18:2;O) 34:8;O2	77	non-acclimated - control	2.109	2.86e-10	2.05e-07
lipid0553	MGDG-O(FA 18:2;O) 36:8;O2	77	non-acclimated - control	1.8391	9.8e-08	7.02e-05
lipid0501	MGDG-O(FA 18:3) 34:6	77	non-acclimated - control	6.3215	0	0
lipid0503	MGDG-O(FA 18:3) 34:7;O	77	non-acclimated - control	4.9315	6.39e-14	4.59e-11
lipid0506	MGDG-O(FA 18:3) 34:7;O2 or MGDG-O(FA 18:3) 36:5	77	non-acclimated - control	3.7834	0	0
lipid0505	MGDG-O(FA 18:3) 36:6 or MGDG-O(FA 18:3) 34:8;O2	77	non-acclimated - control	5.7843	0	0
lipid0508	MGDG-O(FA 18:3) 36:7;O	77	non-acclimated - control	2.8884	2.87e-08	2.06e-05
lipid0512	MGDG-O(FA 18:3) 36:8;O2	77	non-acclimated - control	3.2418	7.42e-10	5.32e-07
lipid0574	MGDG-O(FA 18:4;O) 36:8;O2 (alternative fragmentation; Arabidopside G)	77	non-acclimated - control	3.2478	4.67e-10	3.35e-07
lipid0544	MGDG-O(FA 18:3;O) 36:6 or MGDG-O(FA 18:3;O) 34:8;O2	77	non-acclimated - control	1.6851	6.69e-09	4.8e-06
lipid0559	MGDG-O(FA 18:4;O2) 34:6	77	non-acclimated - control	2.2435	2.81e-05	0.0201323
lipid0561	MGDG-O(FA 18:4;O2) 36:6 or MGDG-O(FA 18:4;O2) 34:8;O2	77	non-acclimated - control	2.1355	2.92e-07	0.000209457
lipid0533	MGDG-O(FA 18:4;O) 34:7;O	77	non-acclimated - control	2.3023	1.23e-05	0.00882913
lipid0535	MGDG-O(FA 18:4;O) 34:8;O2 (Arabidopside E or MGDG-O(FA 18:4;O) 36:6)	77	non-acclimated - control	4.0148	0	0
lipid0540	MGDG-O(FA 18:4;O) 36:8;O2 (Arabidopside G)	77	non-acclimated - control	3.6036	3.98e-06	0.0028508
lipid0556	MGDG-O(FA 18:5;O2) 36:6 or MGDG-O(FA 18:5;O2) 34:8;O2	77	non-acclimated - control	1.5817	4.88e-05	0.034993
lipid0293	PG-O(FA 16:1) 36:8;O2**	77	non-acclimated - control	1.2138	3.58e-05	0.0256728
lipid0282	DG 16:1_18:3**	77	non-acclimated - control	1.0222	1.85e-10	1.33e-07
lipid0281	DG 18:3_16:3**	77	non-acclimated - control	2.5743	0	0
lipid0284	DG 18:3_18:3*	77	non-acclimated - control	1.291	5.22e-15	3.74e-12
lipid0394	DGDG 18:3;O2_16:3*	77	non-acclimated - control	1.1321	1.5e-06	0.00107427
lipid0396	DGDG 18:4;O_18:3	77	non-acclimated - control	2.2531	0	0
lipid0398	DGDG 18:4;O_18:4;O (Arabidopside D)*	77	non-acclimated - control	2.1367	0	0
lipid0163	DGDG 34:4	77	non-acclimated - control	-0.6132	4.25e-05	0.030455
lipid0169	DGDG 36:4	77	non-acclimated - control	-0.5099	6.23e-05	0.0446795
lipid0167	DGDG 36:6	77	non-acclimated - control	-0.6274	2.55e-05	0.0182667
lipid0157	DGMG 16:0	77	non-acclimated - control	1.2302	2.59e-12	1.86e-09
lipid0255	Campesterol-Hex 16:0	77	non-acclimated - control	1.253	1.06e-13	7.63e-11
lipid0258	Campesterol-Hex 18:3	77	non-acclimated - control	1.4689	1.11e-16	7.96e-14
lipid0257	Sitosterol-Hex 16:0	77	non-acclimated - control	1.3244	3.44e-15	2.47e-12
lipid0260	Sitosterol-Hex 18:3	77	non-acclimated - control	1.6004	2.22e-16	1.59e-13
lipid0818	Sitosterol-Hex 18:4;O	77	non-acclimated - control	1.1248	4.32e-06	0.00309858
lipid0256	Stigmasterol-Hex 16:0	77	non-acclimated - control	1.3079	6.97e-11	5e-08
lipid0259	Stigmasterol-Hex 18:3	77	non-acclimated - control	1.5196	0	0
Ion Leakage	Ion Leakage	77	non-acclimated - control	2.9706	5.6e-09	4.02e-06
lipid0025	LPC 16:0	77	non-acclimated - control	1.3395	1.66e-05	0.0118717
lipid0027	LPC 18:2	77	non-acclimated - control	0.7209	3.69e-05	0.026461
lipid0026	LPC 18:3	77	non-acclimated - control	0.8682	1.02e-08	7.35e-06
lipid0052	LPE 16:0	77	non-acclimated - control	1.4814	0	0
lipid0637	MGDG 18:3_16:3;O*	77	non-acclimated - control	-0.9319	1.85e-07	0.000132436
lipid0325	MGDG 18:4;O_16:4;O (16:4;O as fragment; Arabidopside A)	77	non-acclimated - control	1.86	1.29e-05	0.00923688
lipid0372	MGDG 18:4;O_18:3	77	non-acclimated - control	1.5963	5.54e-12	3.97e-09
lipid0137	MGDG 30:6;O2	77	non-acclimated - control	-0.7829	1.03e-07	7.42e-05
lipid0143	MGDG 34:3	77	non-acclimated - control	-1.3383	2.44e-15	1.75e-12
lipid0142	MGDG 34:4	77	non-acclimated - control	-1.7071	0	0
lipid0141	MGDG 34:5	77	non-acclimated - control	-1.5943	1.18e-13	8.47e-11
lipid0140	MGDG 34:6	77	non-acclimated - control	-1.4211	2.07e-11	1.48e-08
lipid0808	MGDG 35:3	77	non-acclimated - control	-0.6715	3.81e-05	0.0273443
lipid0149	MGDG 36:3	77	non-acclimated - control	-1.0571	3.17e-12	2.27e-09
lipid0148	MGDG 36:4 or MGDG 34:6;O2	77	non-acclimated - control	-1.0887	1.31e-12	9.41e-10
lipid0147	MGDG 36:5 or MGDG 34:7;O2	77	non-acclimated - control	-0.972	1.16e-08	8.34e-06
lipid0146	MGDG 36:6 or MGDG 34:8;O2	77	non-acclimated - control	-1.1041	4.6e-10	3.3e-07
lipid0154	MGDG 38:4 or MGDG 36:6;O2	77	non-acclimated - control	-0.5918	2.7e-05	0.0193319
lipid0153	MGDG 38:5 or MGDG 36:7;O2	77	non-acclimated - control	-0.8255	1.92e-07	0.00013783
lipid0126	PA 34:1	77	non-acclimated - control	2.2253	3.7e-09	2.65e-06
lipid0125	PA 34:2	77	non-acclimated - control	2.4329	0	0
lipid0124	PA 34:3	77	non-acclimated - control	2.6583	0	0
lipid0123	PA 34:4	77	non-acclimated - control	3.8501	2.83e-10	2.03e-07
lipid0122	PA 34:5*	77	non-acclimated - control	2.3042	2.33e-15	1.67e-12
lipid0121	PA 34:6	77	non-acclimated - control	3.3595	0	0
lipid0131	PA 36:2	77	non-acclimated - control	2.5424	2e-12	1.43e-09
lipid0130	PA 36:3	77	non-acclimated - control	1.9848	8.44e-10	6.05e-07
lipid0129	PA 36:4	77	non-acclimated - control	2.0551	5.4e-06	0.00387247
lipid0128	PA 36:5	77	non-acclimated - control	2.5506	0	0
lipid0127	PA 36:6	77	non-acclimated - control	2.855	0	0
lipid0035	PC 34:1	77	non-acclimated - control	-1.1406	3.39e-13	2.43e-10
lipid0034	PC 34:2	77	non-acclimated - control	-0.8384	7.04e-09	5.04e-06
lipid0842	PC 34:6	77	non-acclimated - control	1.6416	1.77e-14	1.27e-11
lipid0040	PC 36:2	77	non-acclimated - control	-1.1207	1.04e-13	7.47e-11
lipid0039	PC 36:3	77	non-acclimated - control	-1.15	2.98e-14	2.13e-11
lipid0038	PC 36:4	77	non-acclimated - control	-1.0224	1.49e-11	1.07e-08
lipid0037	PC 36:5	77	non-acclimated - control	-0.7719	4.32e-07	0.000309846
lipid0046	PC 38:2	77	non-acclimated - control	-0.9596	1.61e-09	1.16e-06
lipid0045	PC 38:3	77	non-acclimated - control	-0.9685	9.74e-10	6.98e-07
lipid0044	PC 38:4	77	non-acclimated - control	-0.8415	2.75e-08	1.97e-05
lipid0043	PC 38:5	77	non-acclimated - control	-0.7635	5.42e-07	0.000388884
lipid0050	PC 40:2*	77	non-acclimated - control	-0.61	3.43e-05	0.0246058
lipid0049	PC 40:3*	77	non-acclimated - control	-0.724	3.45e-06	0.00247089
lipid0048	PC 40:4*	77	non-acclimated - control	-0.844	3.18e-07	0.0002278
lipid0063	PE 34:2	77	non-acclimated - control	-0.7156	6.75e-07	0.000484231
lipid0062	PE 34:3	77	non-acclimated - control	-0.6532	3.77e-06	0.00270506
lipid0069	PE 36:2	77	non-acclimated - control	-0.7679	2.67e-05	0.0191537
lipid0068	PE 36:3	77	non-acclimated - control	-0.8836	5.75e-10	4.12e-07
lipid0067	PE 36:4	77	non-acclimated - control	-0.8074	5.26e-08	3.77e-05
lipid0066	PE 36:5	77	non-acclimated - control	-0.7562	4.87e-07	0.000348942
lipid0065	PE 36:6	77	non-acclimated - control	-0.6592	6.75e-06	0.00484045
lipid0072	PE 38:5	77	non-acclimated - control	-0.7025	2.99e-05	0.0214074
lipid0356	PG 18:4;O_16:1	77	non-acclimated - control	1.1709	4.13e-05	0.0296111
lipid0012	PG 34:1	77	non-acclimated - control	-0.8712	7.79e-10	5.59e-07
lipid0011	PG 34:2	77	non-acclimated - control	-0.6699	2.31e-06	0.00165398
lipid0009	PG 34:4	77	non-acclimated - control	-0.9063	2.7e-06	0.00193481
lipid0095	PS 34:3	77	non-acclimated - control	-0.954	2.4e-07	0.000171778
lipid0116	PS 42:2	77	non-acclimated - control	-0.9577	1.28e-13	9.17e-11
lipid0115	PS 42:3	77	non-acclimated - control	-1.0146	2.79e-10	2e-07
lipid0280	TG 18:2_36:5	77	non-acclimated - control	1.3037	2.22e-16	1.59e-13
lipid0276	TG 18:3_34:2*	77	non-acclimated - control	1.8813	1.4e-05	0.0100235
lipid0278	TG 18:3_36:5	77	non-acclimated - control	1.5574	9.25e-11	6.63e-08
lipid0277	TG 18:3_36:6	77	non-acclimated - control	2.0547	6.9e-08	4.95e-05
lipid0305	TeGDG 34:6	77	non-acclimated - control	4.2118	0	0
lipid0309	TeGDG 36:6	77	non-acclimated - control	2.0584	5.12e-13	3.67e-10
lipid0294	TrGDG 34:6	77	non-acclimated - control	5.2182	0	0
lipid0298	TrGDG 36:6	77	non-acclimated - control	3.0993	0	0
lipid0259	Stigmasterol-Hex 18:3	77	non-acclimated - acclimated	0.7584	2.46e-05	0.0176214
lipid0055	LPE 18:1*	77	non-acclimated - acclimated	-0.7734	6.34e-06	0.00454837
lipid0124	PA 34:3	77	non-acclimated - acclimated	1.0212	5.74e-05	0.0411569
lipid0065	PE 36:6	77	non-acclimated - acclimated	-0.6525	1.07e-05	0.00768331
lipid0075	PE 40:3	77	non-acclimated - acclimated	-0.5751	8.32e-06	0.00596494
lipid0079	PE 42:2	77	non-acclimated - acclimated	-0.5175	4.67e-05	0.0335137
lipid0078	PE 42:3 (measured in positive mode)	77	non-acclimated - acclimated	-0.7989	5.63e-10	4.04e-07
lipid0603	DGDG-O(FA 18:4;O) 36:8;O2	98	acclimated - control	1.8343	8.65e-10	6.2e-07
lipid0473	MGDG-O(FA 16:0) 34:6	98	acclimated - control	2.1693	2.85e-05	0.0204375
lipid0476	MGDG-O(FA 16:0) 36:6 or MGDG-O(FA 16:0) 34:8;O2	98	acclimated - control	2.7548	9.72e-10	6.97e-07
lipid0483	MGDG-O(FA 16:0) 36:8;O2	98	acclimated - control	1.851	1.33e-06	0.000952475
lipid0461	MGDG-O(FA 16:2) 36:6 or MGDG-O(FA 16:2) 34:8;O2	98	acclimated - control	0.7688	8.7e-06	0.00623476
lipid0448	MGDG-O(FA 16:3) 34:6	98	acclimated - control	2.7829	4.31e-08	3.09e-05
lipid0454	MGDG-O(FA 16:3) 36:6 or MGDG-O(FA 16:3) 34:8;O2	98	acclimated - control	1.8477	3.29e-05	0.02362
lipid0495	MGDG-O(FA 16:4;O) 36:8;O2	98	acclimated - control	1.3457	9.03e-06	0.00647281
lipid0522	MGDG-O(FA 16:3;O2) 36:6 or MGDG-O(FA 16:3;O2) 34:8;O2 or MGDG-O(FA 18:1) 36:6 or MGDG-O(FA 18:1) 34:8;O2	98	acclimated - control	1.0971	3.78e-05	0.0271092
lipid0501	MGDG-O(FA 18:3) 34:6	98	acclimated - control	3.4253	1.5e-09	1.07e-06
lipid0503	MGDG-O(FA 18:3) 34:7;O	98	acclimated - control	2.8255	8.46e-08	6.06e-05
lipid0505	MGDG-O(FA 18:3) 36:6 or MGDG-O(FA 18:3) 34:8;O2	98	acclimated - control	3.4928	3.31e-10	2.37e-07
lipid0566	MGDG-O(FA 18:3;O2) 34:6	98	acclimated - control	1.6343	2.56e-07	0.000183224
lipid0575	MGDG-O(FA 18:4;O) 36:7;O2 (alternative fragmentation)	98	acclimated - control	1.1345	1.45e-12	1.04e-09
lipid0574	MGDG-O(FA 18:4;O) 36:8;O2 (alternative fragmentation; Arabidopside G)	98	acclimated - control	3.4432	0	0
lipid0570	MGDG-O(FA 18:3;O2) 36:6 or MGDG-O(FA 18:3;O2) 34:8;O2	98	acclimated - control	1.2805	4.17e-13	2.99e-10
lipid0580	MGDG-O(FA 18:3;O2) 36:8;O2	98	acclimated - control	1.6509	1.67e-08	1.2e-05
lipid0561	MGDG-O(FA 18:4;O2) 36:6 or MGDG-O(FA 18:4;O2) 34:8;O2	98	acclimated - control	2.0025	1.86e-06	0.00133161
lipid0565	MGDG-O(FA 18:4;O2) 36:8;O2	98	acclimated - control	1.2095	4.44e-05	0.0318249
lipid0588	MGDG-O(FA 18:4;O3) 36:6 or MGDG-O(FA 18:4;O3) 34:8;O2	98	acclimated - control	1.5736	6.52e-05	0.046733
lipid0533	MGDG-O(FA 18:4;O) 34:7;O	98	acclimated - control	1.6746	6.41e-05	0.0459534
lipid0535	MGDG-O(FA 18:4;O) 34:8;O2 (Arabidopside E or MGDG-O(FA 18:4;O) 36:6)	98	acclimated - control	4.1097	0	0
lipid0538	MGDG-O(FA 18:4;O) 36:6;O or MGDG-O(FA 18:4;O) 34:8;O3	98	acclimated - control	1.1758	3.45e-06	0.00247612
lipid0537	MGDG-O(FA 18:4;O) 36:7;O	98	acclimated - control	2.1644	6.59e-08	4.72e-05
lipid0540	MGDG-O(FA 18:4;O) 36:8;O2 (Arabidopside G)	98	acclimated - control	3.5873	0	0
lipid0541	MGDG-O(FA 18:4;O) 38:4 or MGDG-O(FA 18:4;O) 36:6;O2	98	acclimated - control	1.0394	1.48e-05	0.0105836
lipid0293	PG-O(FA 16:1) 36:8;O2**	98	acclimated - control	1.5631	7.69e-12	5.52e-09
lipid0294	TrGDG 34:6	98	acclimated - control	3.8519	1.33e-10	9.52e-08
lipid0601	DGDG-O(FA 18:4;O) 36:6 or DGDG-O(FA 18:4;O) 34:8;O2	98	non-acclimated - control	1.0214	3.99e-06	0.00286377
lipid0603	DGDG-O(FA 18:4;O) 36:8;O2	98	non-acclimated - control	1.5722	1.45e-07	0.000103907
lipid0473	MGDG-O(FA 16:0) 34:6	98	non-acclimated - control	4.5215	0	0
lipid0474	MGDG-O(FA 16:0) 34:7;O	98	non-acclimated - control	2.3645	1.33e-10	9.55e-08
lipid0476	MGDG-O(FA 16:0) 36:6 or MGDG-O(FA 16:0) 34:8;O2	98	non-acclimated - control	3.7956	0	0
lipid0483	MGDG-O(FA 16:0) 36:8;O2	98	non-acclimated - control	2.3561	3.93e-10	2.81e-07
lipid0464	MGDG-O(FA 16:1) 34:6	98	non-acclimated - control	1.7269	2.79e-05	0.0199751
lipid0468	MGDG-O(FA 16:1) 36:6 or MGDG-O(FA 16:1) 34:8;O2	98	non-acclimated - control	1.5872	5.84e-12	4.19e-09
lipid0459	MGDG-O(FA 16:2) 34:6	98	non-acclimated - control	1.6449	4.62e-05	0.0330962
lipid0461	MGDG-O(FA 16:2) 36:6 or MGDG-O(FA 16:2) 34:8;O2	98	non-acclimated - control	1.0066	2.51e-09	1.8e-06
lipid0448	MGDG-O(FA 16:3) 34:6	98	non-acclimated - control	5.4953	0	0
lipid0454	MGDG-O(FA 16:3) 36:6 or MGDG-O(FA 16:3) 34:8;O2	98	non-acclimated - control	3.7048	0	0
lipid0496	MGDG-O(FA 16:3;O) 34:6	98	non-acclimated - control	1.7519	1.33e-06	0.000954104
lipid0498	MGDG-O(FA 16:3;O) 34:8;O2 or MGDG-O(FA 16:3;O) 36:6	98	non-acclimated - control	1.516	3.75e-05	0.0268606
lipid0487	MGDG-O(FA 16:4;O) 34:7;O	98	non-acclimated - control	1.1257	4.55e-05	0.0326211
lipid0495	MGDG-O(FA 16:4;O) 36:8;O2	98	non-acclimated - control	1.2861	2.03e-05	0.0145267
lipid0526	MGDG-O(FA 18:0) 34:6	98	non-acclimated - control	2.7994	1.06e-10	7.62e-08
lipid0528	MGDG-O(FA 18:0) 34:8;O2 or MGDG-O(FA 18:0) 36:6	98	non-acclimated - control	2.2379	8.26e-10	5.93e-07
lipid0519	MGDG-O(FA 16:3;O2) 34:6 or MGDG-O(FA 18:1) 34:6	98	non-acclimated - control	2.7709	1.86e-11	1.33e-08
lipid0522	MGDG-O(FA 16:3;O2) 36:6 or MGDG-O(FA 16:3;O2) 34:8;O2 or MGDG-O(FA 18:1) 36:6 or MGDG-O(FA 18:1) 34:8;O2	98	non-acclimated - control	1.3526	2.11e-07	0.000151585
lipid0514	MGDG-O(FA 18:2) 34:6	98	non-acclimated - control	4.3344	0	0
lipid0515	MGDG-O(FA 18:2) 34:7;O	98	non-acclimated - control	2.4203	1.95e-11	1.4e-08
lipid0516	MGDG-O(FA 18:2) 36:6 or MGDG-O(FA 18:2) 34:8;O2	98	non-acclimated - control	2.9101	1.53e-14	1.1e-11
lipid0518	MGDG-O(FA 18:2) 36:8;O2	98	non-acclimated - control	1.3953	1.6e-05	0.0114583
lipid0551	MGDG-O(FA 18:2;O) 36:6 or MGDG-O(FA 18:2;O) 34:8;O2	98	non-acclimated - control	2.4944	2.89e-15	2.07e-12
lipid0553	MGDG-O(FA 18:2;O) 36:8;O2	98	non-acclimated - control	2.224	7.47e-08	5.36e-05
lipid0501	MGDG-O(FA 18:3) 34:6	98	non-acclimated - control	6.168	0	0
lipid0503	MGDG-O(FA 18:3) 34:7;O	98	non-acclimated - control	4.6783	0	0
lipid0506	MGDG-O(FA 18:3) 34:7;O2 or MGDG-O(FA 18:3) 36:5	98	non-acclimated - control	3.4974	0	0
lipid0505	MGDG-O(FA 18:3) 36:6 or MGDG-O(FA 18:3) 34:8;O2	98	non-acclimated - control	5.4509	0	0
lipid0508	MGDG-O(FA 18:3) 36:7;O	98	non-acclimated - control	3.1583	2.78e-12	1.99e-09
lipid0512	MGDG-O(FA 18:3) 36:8;O2	98	non-acclimated - control	3.1776	1.51e-11	1.08e-08
lipid0566	MGDG-O(FA 18:3;O2) 34:6	98	non-acclimated - control	2.0814	4.61e-11	3.31e-08
lipid0575	MGDG-O(FA 18:4;O) 36:7;O2 (alternative fragmentation)	98	non-acclimated - control	0.9023	3.05e-08	2.19e-05
lipid0574	MGDG-O(FA 18:4;O) 36:8;O2 (alternative fragmentation; Arabidopside G)	98	non-acclimated - control	3.3614	0	0
lipid0570	MGDG-O(FA 18:3;O2) 36:6 or MGDG-O(FA 18:3;O2) 34:8;O2	98	non-acclimated - control	1.1236	1.11e-10	7.94e-08
lipid0580	MGDG-O(FA 18:3;O2) 36:8;O2	98	non-acclimated - control	2.0463	1.27e-12	9.14e-10
lipid0591	MGDG-O(FA 18:3;O3) 34:6	98	non-acclimated - control	1.8863	1.97e-09	1.41e-06
lipid0592	MGDG-O(FA 18:3;O3) 34:7;O	98	non-acclimated - control	1.4083	1.63e-05	0.0117179
lipid0542	MGDG-O(FA 18:3;O) 34:6	98	non-acclimated - control	1.8037	4.99e-09	3.58e-06
lipid0543	MGDG-O(FA 18:3;O) 34:7;O	98	non-acclimated - control	1.736	1.8e-06	0.00129061
lipid0544	MGDG-O(FA 18:3;O) 36:6 or MGDG-O(FA 18:3;O) 34:8;O2	98	non-acclimated - control	2.5355	9.17e-08	6.57e-05
lipid0546	MGDG-O(FA 18:3;O) 36:6;O	98	non-acclimated - control	1.7599	1.89e-08	1.36e-05
lipid0548	MGDG-O(FA 18:3;O) 36:8;O2	98	non-acclimated - control	2.0314	8.26e-08	5.92e-05
lipid0559	MGDG-O(FA 18:4;O2) 34:6	98	non-acclimated - control	2.0757	6.92e-10	4.96e-07
lipid0561	MGDG-O(FA 18:4;O2) 36:6 or MGDG-O(FA 18:4;O2) 34:8;O2	98	non-acclimated - control	2.366	6.86e-09	4.92e-06
lipid0565	MGDG-O(FA 18:4;O2) 36:8;O2	98	non-acclimated - control	1.2941	9.59e-06	0.00687314
lipid0588	MGDG-O(FA 18:4;O3) 36:6 or MGDG-O(FA 18:4;O3) 34:8;O2	98	non-acclimated - control	1.8276	2.06e-06	0.00147929
lipid0532	MGDG-O(FA 18:4;O) 34:6	98	non-acclimated - control	1.4534	1.53e-06	0.00109503
lipid0533	MGDG-O(FA 18:4;O) 34:7;O	98	non-acclimated - control	2.4805	8.12e-10	5.82e-07
lipid0535	MGDG-O(FA 18:4;O) 34:8;O2 (Arabidopside E or MGDG-O(FA 18:4;O) 36:6)	98	non-acclimated - control	3.7873	0	0
lipid0537	MGDG-O(FA 18:4;O) 36:7;O	98	non-acclimated - control	2.1134	1.54e-07	0.000110351
lipid0540	MGDG-O(FA 18:4;O) 36:8;O2 (Arabidopside G)	98	non-acclimated - control	3.4201	0	0
lipid0556	MGDG-O(FA 18:5;O2) 36:6 or MGDG-O(FA 18:5;O2) 34:8;O2	98	non-acclimated - control	1.7046	4.48e-05	0.0321355
lipid0293	PG-O(FA 16:1) 36:8;O2**	98	non-acclimated - control	1.8611	3.33e-16	2.39e-13
lipid0283	DG 16:0_18:3*	98	non-acclimated - control	1.2855	7.61e-06	0.00545882
lipid0282	DG 16:1_18:3**	98	non-acclimated - control	2.1891	1.95e-12	1.4e-09
lipid0281	DG 18:3_16:3**	98	non-acclimated - control	2.4034	2.16e-06	0.00155212
lipid0286	DG 18:3_18:1**	98	non-acclimated - control	0.7871	3.12e-06	0.00223835
lipid0285	DG 18:2_18:3*	98	non-acclimated - control	0.9719	4.97e-06	0.0035666
lipid0284	DG 18:3_18:3*	98	non-acclimated - control	1.2545	2.95e-07	0.000211752
lipid0354	DGDG 18:3_18:5;O2	98	non-acclimated - control	0.7001	1.16e-06	0.000831857
lipid0394	DGDG 18:3;O2_16:3*	98	non-acclimated - control	1.6386	4.7e-06	0.00337085
lipid0632	DGDG 16:0_18:3;O*	98	non-acclimated - control	0.9786	7.53e-07	0.000539986
lipid0396	DGDG 18:4;O_18:3	98	non-acclimated - control	2.214	5.53e-12	3.97e-09
lipid0399	DGDG 18:4;O_18:3;O**	98	non-acclimated - control	2.2082	5.39e-07	0.000386134
lipid0402	DGDG 18:4;O_18:4;O2 or DGDG 18:4;O_20:2*	98	non-acclimated - control	2.0687	4.47e-06	0.00320277
lipid0398	DGDG 18:4;O_18:4;O (Arabidopside D)*	98	non-acclimated - control	2.1928	8.1e-06	0.00580478
lipid0164	DGDG 34:3	98	non-acclimated - control	-1.2844	3.85e-05	0.0276009
lipid0210	GIPC 42:1;O4	98	non-acclimated - control	-0.7146	3.05e-09	2.19e-06
lipid0212	GIPC 42:2;O4	98	non-acclimated - control	-0.5603	8.2e-06	0.00587677
lipid0255	Campesterol-Hex 16:0	98	non-acclimated - control	1.1892	4.75e-05	0.0340345
lipid0258	Campesterol-Hex 18:3	98	non-acclimated - control	1.5271	9.28e-11	6.66e-08
lipid0257	Sitosterol-Hex 16:0	98	non-acclimated - control	1.3144	7.59e-06	0.00544106
lipid0263	Sitosterol-Hex 18:2	98	non-acclimated - control	0.6977	4.31e-05	0.0309045
lipid0260	Sitosterol-Hex 18:3	98	non-acclimated - control	1.7721	1.12e-12	8.04e-10
lipid0818	Sitosterol-Hex 18:4;O	98	non-acclimated - control	1.6308	2.93e-11	2.1e-08
lipid0259	Stigmasterol-Hex 18:3	98	non-acclimated - control	1.2945	1.09e-06	0.000778571
lipid0817	Stigmasterol-Hex 18:4;O	98	non-acclimated - control	0.9337	5.49e-07	0.000393688
Ion Leakage	Ion Leakage	98	non-acclimated - control	3.1704	7.93e-11	5.69e-08
lipid0383	MGDG 18:3;O2_18:3;O**	98	non-acclimated - control	0.8895	1.31e-07	9.39e-05
lipid0372	MGDG 18:4;O_18:3	98	non-acclimated - control	1.9356	6.14e-08	4.41e-05
lipid0385	MGDG 18:4;O_18:3;O3**	98	non-acclimated - control	1.41	1.72e-06	0.00123159
lipid0386	MGDG 18:4;O_18:3;O4**	98	non-acclimated - control	1.2653	2.46e-07	0.000176326
lipid0143	MGDG 34:3	98	non-acclimated - control	-1.6394	5.47e-05	0.0392354
lipid0149	MGDG 36:3	98	non-acclimated - control	-1.4534	6.15e-05	0.0440969
lipid0126	PA 34:1	98	non-acclimated - control	2.5494	2.14e-07	0.000153621
lipid0125	PA 34:2	98	non-acclimated - control	2.6151	1.29e-07	9.23e-05
lipid0124	PA 34:3	98	non-acclimated - control	2.5813	2.99e-08	2.15e-05
lipid0123	PA 34:4	98	non-acclimated - control	3.6761	0	0
lipid0122	PA 34:5*	98	non-acclimated - control	2.2251	8.53e-10	6.11e-07
lipid0121	PA 34:6	98	non-acclimated - control	2.7826	1.59e-09	1.14e-06
lipid0131	PA 36:2	98	non-acclimated - control	2.9531	1.81e-05	0.0129983
lipid0130	PA 36:3	98	non-acclimated - control	2.335	6.22e-06	0.00446277
lipid0129	PA 36:4	98	non-acclimated - control	2.3392	6.99e-06	0.00501388
lipid0128	PA 36:5	98	non-acclimated - control	2.4396	6.76e-07	0.000484599
lipid0127	PA 36:6	98	non-acclimated - control	2.4635	3.04e-08	2.18e-05
lipid0604	PE 16:0_18:4;O2*	98	non-acclimated - control	0.543	5.92e-08	4.24e-05
lipid0356	PG 18:4;O_16:1	98	non-acclimated - control	1.5037	1.63e-06	0.00116588
lipid0364	PG 18:4;O_18:2*	98	non-acclimated - control	0.9328	3.71e-05	0.0265986
lipid0007	PG 32:1	98	non-acclimated - control	-0.7255	3.8e-14	2.72e-11
lipid0012	PG 34:1	98	non-acclimated - control	-0.8917	5.33e-06	0.0038197
lipid0011	PG 34:2	98	non-acclimated - control	-1.0316	4.51e-05	0.032303
lipid0022	PG 34:3;O	98	non-acclimated - control	-0.3701	1.25e-05	0.00897148
lipid0009	PG 34:4	98	non-acclimated - control	-1.2173	5.82e-08	4.17e-05
lipid0116	PS 42:2	98	non-acclimated - control	-0.9146	1.59e-05	0.0113779
lipid0177	SQMG 16:0	98	non-acclimated - control	1.4168	4.14e-07	0.000296577
lipid0178	SQMG 18:3	98	non-acclimated - control	0.9838	2e-07	0.000143412
lipid0305	TeGDG 34:6	98	non-acclimated - control	3.5093	3.51e-05	0.0251418
lipid0294	TrGDG 34:6	98	non-acclimated - control	3.6831	1.1e-09	7.86e-07
lipid0298	TrGDG 36:6	98	non-acclimated - control	2.2883	4.7e-05	0.0336919
lipid0473	MGDG-O(FA 16:0) 34:6	98	non-acclimated - acclimated	2.3522	3.78e-06	0.00270729
lipid0448	MGDG-O(FA 16:3) 34:6	98	non-acclimated - acclimated	2.7125	1.41e-07	0.000101412
lipid0454	MGDG-O(FA 16:3) 36:6 or MGDG-O(FA 16:3) 34:8;O2	98	non-acclimated - acclimated	1.8571	3.02e-05	0.0216662
lipid0514	MGDG-O(FA 18:2) 34:6	98	non-acclimated - acclimated	2.376	1.06e-05	0.00759262
lipid0551	MGDG-O(FA 18:2;O) 36:6 or MGDG-O(FA 18:2;O) 34:8;O2	98	non-acclimated - acclimated	1.3959	2.39e-05	0.0171193
lipid0501	MGDG-O(FA 18:3) 34:6	98	non-acclimated - acclimated	2.7426	2.63e-06	0.0018876
lipid0506	MGDG-O(FA 18:3) 34:7;O2 or MGDG-O(FA 18:3) 36:5	98	non-acclimated - acclimated	2.0705	1.43e-06	0.00102495
lipid0542	MGDG-O(FA 18:3;O) 34:6	98	non-acclimated - acclimated	1.6871	4.68e-08	3.36e-05
lipid0546	MGDG-O(FA 18:3;O) 36:6;O	98	non-acclimated - acclimated	1.58	9.68e-07	0.00069399
lipid0282	DG 16:1_18:3**	98	non-acclimated - acclimated	1.5803	7.46e-07	0.000535107
lipid0632	DGDG 16:0_18:3;O*	98	non-acclimated - acclimated	0.846	3.05e-05	0.0218895
lipid0396	DGDG 18:4;O_18:3	98	non-acclimated - acclimated	1.6435	6.02e-07	0.000431612
lipid0402	DGDG 18:4;O_18:4;O2 or DGDG 18:4;O_20:2*	98	non-acclimated - acclimated	1.8915	3.28e-05	0.0235003
lipid0258	Campesterol-Hex 18:3	98	non-acclimated - acclimated	1.1415	1.71e-06	0.00122938
lipid0263	Sitosterol-Hex 18:2	98	non-acclimated - acclimated	0.77	4.3e-06	0.00308121
lipid0260	Sitosterol-Hex 18:3	98	non-acclimated - acclimated	1.3916	1.2e-07	8.58e-05
Ion Leakage	Ion Leakage	98	non-acclimated - acclimated	2.5523	2.53e-07	0.000181259
lipid0383	MGDG 18:3;O2_18:3;O**	98	non-acclimated - acclimated	0.7681	8.64e-06	0.00619138
lipid0123	PA 34:4	98	non-acclimated - acclimated	2.3046	1.15e-08	8.24e-06
lipid0078	PE 42:3 (measured in positive mode)	98	non-acclimated - acclimated	-1.8928	5.44e-05	0.0390022
lipid0022	PG 34:3;O	98	non-acclimated - acclimated	-0.4161	9.11e-07	0.000653321
lipid0018	PG 36:2	98	non-acclimated - acclimated	-0.5826	7.06e-06	0.00506038
lipid0017	PG 36:3	98	non-acclimated - acclimated	-0.9057	2.17e-05	0.01555
lipid0016	PG 36:4	98	non-acclimated - acclimated	-0.8853	2.39e-06	0.00171063
lipid0015	PG 36:5	98	non-acclimated - acclimated	-0.8506	5.94e-05	0.0426218

## Sheet: Table S3
Table S3. Internal standards. The amounts shown are in 20 µl of stock made in chloroform. Matreya is Matreya LLC (Pleasant Gap, PA, USA). Avanti is Avanti Polar Lipids, Inc. (Alabaster, AL, USA). Nu-Chek is Nu-Chek Prep, Inc. (Elysian, MN, USA). Semi-synthetic indicates that the material was synthesized from PC(23:0/23:0) (Avanti) by transphosphatidylation [Comfurius, P.; Zwaal, R.F. The enzymati…
Internal standards (total acyl carbons: total carbon-carbon double bonds)	Internal standards with individual acyl chains specified	Amount per 20 μL (nmol) (the amount added with 0.04 mg dry mass of rosette tissue)	Origin
DGDG 34:0	DGDG 18:0/16:0	0.359	Matreya
DGDG 36:0	DGDG 18:0/18:0	0.947	Matreya
LPC 13:0	LPC 13:0	0.12	Avanti
LPC 19:0	LPC 19:0	0.12	Avanti
LPE 14:0	LPE 14:0	0.06	Avanti
LPE 18:0	LPE 18:0	0.06	Avanti
MGDG 34:0	MGDG 18:0/16:0	1.505	Matreya
MGDG 36:0	MGDG 18:0/18:0	1.302	Matreya
PA 28:0	PA 14:0/14:0	0.06	Avanti
PA 40:0	PA diphytanoyl (i.e., PA 20:0/20:0)	0.06	Avanti
PC 24:0	PC 12:0/12:0	0.12	Avanti
PC 48:2	PC 24:1/24:1	0.12	Avanti
PE 24:0	PE 12:0/12:0	0.06	Avanti
PE 46:0	PE 23:0/23:0	0.06	Semi-synthetic
PG 28:0	PG 14:0/14:0	0.06	Avanti
PS 28:0	PS 14:0/14:0	0.04	Avanti
PS 40:0	PS diphytanoyl (i.e., PS 20:0/20:0)	0.04	Avanti
TAG 51:3	TAG 17:1/17:1/17:1	0.308	Nu-Chek

## Sheet: Table S4
Table S4. Lipid nomenclature used in paper. Current nomenclature is based on Liebisch et al. [16], and previously used nomenclature is that used in Vu et al. [14]. Lipid numbers are used by the Welti lab and provide a consistent method of indicating the lipid detected by a particular mass spectral transition.
Lipid number	List of compounds (asterisks indicate LOD issues, Table S6)	Same list as Column B, but with previously used nomenclature
lipid0599	DGDG-O(FA 18:4;O) 34:6	acDGDG(18:4-O/34:6)
lipid0600	DGDG-O(FA 18:4;O) 34:7;O	acDGDG(18:4-O/34:7-O)
lipid0601	DGDG-O(FA 18:4;O) 36:6 or DGDG-O(FA 18:4;O) 34:8;O2	acDGDG(18:4-O/36:6) or acDGDG(18:4-O/34:8-2O)
lipid0603	DGDG-O(FA 18:4;O) 36:8;O2	acDGDG(18:4-O/36:8-2O)
lipid0473	MGDG-O(FA 16:0) 34:6	acMGDG(16:0/34:6)
lipid0474	MGDG-O(FA 16:0) 34:7;O	acMGDG(16:0/34:7-O)
lipid0476	MGDG-O(FA 16:0) 36:6 or MGDG-O(FA 16:0) 34:8;O2	acMGDG(16:0/36:6) or acMGDG(16:0/34:8-2O)
lipid0483	MGDG-O(FA 16:0) 36:8;O2	acMGDG(16:0/36:8-2O)
lipid0464	MGDG-O(FA 16:1) 34:6	acMGDG(16:1/34:6)
lipid0468	MGDG-O(FA 16:1) 36:6 or MGDG-O(FA 16:1) 34:8;O2	acMGDG(16:1/36:6) or acMGDG(16:1/34:8-2O)
lipid0459	MGDG-O(FA 16:2) 34:6	acMGDG(16:2/34:6)
lipid0461	MGDG-O(FA 16:2) 36:6 or MGDG-O(FA 16:2) 34:8;O2	acMGDG(16:2/36:6) or acMGDG(16:2/34:8-2O)
lipid0448	MGDG-O(FA 16:3) 34:6	acMGDG(16:3/34:6)
lipid0454	MGDG-O(FA 16:3) 36:6 or MGDG-O(FA 16:3) 34:8;O2	acMGDG(16:3/36:6) or acMGDG(16:3/34:8-2O)
lipid0519	MGDG-O(FA 16:3;O2) 34:6 or MGDG-O(FA 18:1) 34:6	acMGDG(16:3-2O/34:6) or acMGDG(18:1/34:6)
lipid0522	MGDG-O(FA 16:3;O2) 36:6 or MGDG-O(FA 16:3;O2) 34:8;O2 or MGDG-O(FA 18:1) 36:6 or MGDG-O(FA 18:1) 34:8;O2	acMGDG(16:3-2O/36:6) or acMGDG(16:3-2O/34:8-2O) or acMGDG(18:1/36:6) or acMGDG(18:1/34:8-2O)
lipid0525	MGDG-O(FA 16:3;O2) 36:8;O2 or MGDG-O(FA 18:1) 36:8;O2	acMGDG(16:3-2O/36:8-2O) or acMGDG(18:1/36:8-2O)
lipid0496	MGDG-O(FA 16:3;O) 34:6	acMGDG(16:3-O/34:6)
lipid0498	MGDG-O(FA 16:3;O) 34:8;O2 or MGDG-O(FA 16:3;O) 36:6	acMGDG(16:3-O/34:8-2O) or acMGDG(16:3-O/36:6)
lipid0500	MGDG-O(FA 16:3;O) 36:8;O2	acMGDG(16:3-O/36:8-2O)
lipid0487	MGDG-O(FA 16:4;O) 34:7;O	acMGDG(16:4-O/34:7-O)
lipid0489	MGDG-O(FA 16:4;O) 34:8;O2 or MGDG-O(FA 16:4;O) 36:6	acMGDG(16:4-O/34:8-2O) or acMGDG(16:4-O/36:6)
lipid0495	MGDG-O(FA 16:4;O) 36:8;O2	acMGDG(16:4-O/36:8-2O)
lipid0526	MGDG-O(FA 18:0) 34:6	acMGDG(18:0/34:6)
lipid0527	MGDG-O(FA 18:0) 34:7;O	acMGDG(18:0/34:7-O)
lipid0528	MGDG-O(FA 18:0) 34:8;O2 or MGDG-O(FA 18:0) 36:6	acMGDG(18:0/34:8-2O) or acMGDG(18:0/36:6)
lipid0514	MGDG-O(FA 18:2) 34:6	acMGDG(18:2/34:6)
lipid0515	MGDG-O(FA 18:2) 34:7;O	acMGDG(18:2/34:7-O)
lipid0516	MGDG-O(FA 18:2) 36:6 or MGDG-O(FA 18:2) 34:8;O2	acMGDG(18:2/36:6) or acMGDG(18:2/34:8-2O)
lipid0518	MGDG-O(FA 18:2) 36:8;O2	acMGDG(18:2/36:8-2O)
lipid0583	MGDG-O(FA 18:2;O2) 36:6 or MGDG-O(FA 18:2;O2) 34:8;O2	acMGDG(18:2-2O/36:6) or acMGDG(18:2-2O/34:8-2O)
lipid0596	MGDG-O(FA 18:2;O3) 36:6 or MGDG-O(FA 18:2;O3) 34:8;O2	acMGDG(18:2-3O/36:6) or acMGDG(18:2-3O/34:8-2O)
lipid0551	MGDG-O(FA 18:2;O) 36:6 or MGDG-O(FA 18:2;O) 34:8;O2	acMGDG(18:2-O/36:6) or acMGDG(18:2-O/34:8-2O)
lipid0553	MGDG-O(FA 18:2;O) 36:8;O2	acMGDG(18:2-O/36:8-2O)
lipid0501	MGDG-O(FA 18:3) 34:6	acMGDG(18:3/34:6)
lipid0506	MGDG-O(FA 18:3) 34:7;O2 or MGDG-O(FA 18:3) 36:5	acMGDG(18:3/34:7-2O) or acMGDG(18:3/36:5)
lipid0503	MGDG-O(FA 18:3) 34:7;O	acMGDG(18:3/34:7-O)
lipid0505	MGDG-O(FA 18:3) 36:6 or MGDG-O(FA 18:3) 34:8;O2	acMGDG(18:3/36:6) or acMGDG(18:3/34:8-2O)
lipid0508	MGDG-O(FA 18:3) 36:7;O	acMGDG(18:3/36:7-O)
lipid0512	MGDG-O(FA 18:3) 36:8;O2	acMGDG(18:3/36:8-2O)
lipid0566	MGDG-O(FA 18:3;O2) 34:6	acMGDG(18:3-2O/34:6)
lipid0570	MGDG-O(FA 18:3;O2) 36:6 or MGDG-O(FA 18:3;O2) 34:8;O2	acMGDG(18:3-2O/36:6) or acMGDG(18:3-2O/34:8-2O)
lipid0580	MGDG-O(FA 18:3;O2) 36:8;O2	acMGDG(18:3-2O/36:8-2O)
lipid0591	MGDG-O(FA 18:3;O3) 34:6	acMGDG(18:3-3O/34:6)
lipid0592	MGDG-O(FA 18:3;O3) 34:7;O	acMGDG(18:3-3O/34:7-O)
lipid0593	MGDG-O(FA 18:3;O3) 36:6 or MGDG-O(FA 18:3;O3) 34:8;O2	acMGDG(18:3-3O/36:6) or acMGDG(18:3-3O/34:8-2O)
lipid0595	MGDG-O(FA 18:3;O3) 36:8;O2	acMGDG(18:3-3O/36:8-2O)
lipid0542	MGDG-O(FA 18:3;O) 34:6	acMGDG(18:3-O/34:6)
lipid0543	MGDG-O(FA 18:3;O) 34:7;O	acMGDG(18:3-O/34:7-O)
lipid0544	MGDG-O(FA 18:3;O) 36:6 or MGDG-O(FA 18:3;O) 34:8;O2	acMGDG(18:3-O/36:6) or acMGDG(18:3-O/34:8-2O)
lipid0546	MGDG-O(FA 18:3;O) 36:6;O	acMGDG(18:3-O/36:6-O)
lipid0545	MGDG-O(FA 18:3;O) 36:7;O	acMGDG(18:3-O/36:7-O)
lipid0548	MGDG-O(FA 18:3;O) 36:8;O2	acMGDG(18:3-O/36:8-2O)
lipid0559	MGDG-O(FA 18:4;O2) 34:6	acMGDG(18:4-2O/34:6)
lipid0560	MGDG-O(FA 18:4;O2) 34:7;O	acMGDG(18:4-2O/34:7-O)
lipid0561	MGDG-O(FA 18:4;O2) 36:6 or MGDG-O(FA 18:4;O2) 34:8;O2	acMGDG(18:4-2O/36:6) or acMGDG(18:4-2O/34:8-2O)
lipid0565	MGDG-O(FA 18:4;O2) 36:8;O2	acMGDG(18:4-2O/36:8-2O)
lipid0586	MGDG-O(FA 18:4;O3) 34:6	acMGDG(18:4-3O/34:6)
lipid0587	MGDG-O(FA 18:4;O3) 34:7;O	acMGDG(18:4-3O/34:7-O)
lipid0588	MGDG-O(FA 18:4;O3) 36:6 or MGDG-O(FA 18:4;O3) 34:8;O2	acMGDG(18:4-3O/36:6) or acMGDG(18:4-3O/34:8-2O)
lipid0532	MGDG-O(FA 18:4;O) 34:6	acMGDG(18:4-O/34:6)
lipid0533	MGDG-O(FA 18:4;O) 34:7;O	acMGDG(18:4-O/34:7-O)
lipid0535	MGDG-O(FA 18:4;O) 34:8;O2 (Arabidopside E or MGDG-O(FA 18:4;O) 36:6)	acMGDG(18:4-O/34:8-2O) (Arabidopside E) or acMGDG(18:4-O/36:6)
lipid0538	MGDG-O(FA 18:4;O) 36:6;O or MGDG-O(FA 18:4;O) 34:8;O3	acMGDG(18:4-O/36:6-O) or acMGDG(18:4-O/34:8-3O)
lipid0575	MGDG-O(FA 18:4;O) 36:7;O2 (alternative fragmentation)	acMGDG(18:4-O/36:7-2O) (alternative fragmentation)
lipid0537	MGDG-O(FA 18:4;O) 36:7;O	acMGDG(18:4-O/36:7-O)
lipid0574	MGDG-O(FA 18:4;O) 36:8;O2 (alternative fragmentation; Arabidopside G)	acMGDG(18:4-O/36:8-2O) (alternative fragmentation; Arabidopside G)
lipid0540	MGDG-O(FA 18:4;O) 36:8;O2 (Arabidopside G)	acMGDG(18:4-O/36:8-2O) (Arabidopside G)
lipid0541	MGDG-O(FA 18:4;O) 38:4 or MGDG-O(FA 18:4;O) 36:6;O2	acMGDG(18:4-O/38:4) or acMGDG(18:4-O/36:6-2O)
lipid0556	MGDG-O(FA 18:5;O2) 36:6 or MGDG-O(FA 18:5;O2) 34:8;O2	acMGDG(18:5-2O/36:6) or acMGDG(18:5-2O/34:8-2O)
lipid0558	MGDG-O(FA 18:5;O2) 36:8;O2	acMGDG(18:5-2O/36:8-2O)
lipid0293	PG-O(FA 16:1) 36:8;O2**	acPG(16:1/36:8-2O)**
lipid0283	DG 16:0_18:3*	DAG(16:0/18:3)*
lipid0282	DG 16:1_18:3**	DAG(16:1/18:3)**
lipid0285	DG 18:2_18:3*	DAG(18:2/18:3)*
lipid0281	DG 18:3_16:3**	DAG(18:3/16:3)**
lipid0286	DG 18:3_18:1**	DAG(18:3/18:1)**
lipid0284	DG 18:3_18:3*	DAG(18:3/18:3)*
lipid0395	DGDG 16:0_18:3;O2*	DGDG(16:0/18:3-2O)*
lipid0632	DGDG 16:0_18:3;O*	DGDG(16:0/18:3-O)*
lipid0392	DGDG 16:0_18:4;O*	DGDG(16:0/18:4-O)*
lipid0639	DGDG 16:0_18:5;O2	DGDG(16:0/18:5-2O)
lipid0336	DGDG 18:3_16:4;O*	DGDG(18:3/16:4-O)*
lipid0354	DGDG 18:3_18:5;O2	DGDG(18:3/18:5-2O)
lipid0394	DGDG 18:3;O2_16:3*	DGDG(18:3-2O/16:3)*
lipid0400	DGDG 18:3;O2_18:3 or DGDG 18:4;O_18:2;O**	DGDG(18:3-2O/18:3) or DGDG(18:4-O/18:2-O)**
lipid0423	DGDG 18:3;O3_18:3*	DGDG(18:3-3O/18:3)*
lipid0348	DGDG 18:3;O4_16:4;O*	DGDG(18:3-4O/16:4-O)*
lipid0339	DGDG 18:3;O_16:4;O**	DGDG(18:3-O/16:4-O)**
lipid0634	DGDG 18:3;O_18:3*	DGDG(18:3-O/18:3)*
lipid0387	DGDG 18:4;O_16:3*	DGDG(18:4-O/16:3)*
lipid0390	DGDG 18:4;O_16:3;O*	DGDG(18:4-O/16:3-O)*
lipid0338	DGDG 18:4;O_16:4;O (16:4;O as fragment; Arabidopside C)	DGDG(18:4-O/16:4-O) (16:4-O as fragment; Arabidopside C)
lipid0389	DGDG 18:4;O_16:4;O (18:4;O as fragment; Arabidopside C)	DGDG(18:4-O/16:4-O) (18:4-O as fragment; Arabidopside C)
lipid0396	DGDG 18:4;O_18:3	DGDG(18:4-O/18:3)
lipid0399	DGDG 18:4;O_18:3;O**	DGDG(18:4-O/18:3-O)**
lipid0402	DGDG 18:4;O_18:4;O2 or DGDG 18:4;O_20:2*	DGDG(18:4-O/18:4-2O) or DGDG(18:4-O/20:2)*
lipid0398	DGDG 18:4;O_18:4;O (Arabidopside D)*	DGDG(18:4-O/18:4-O) (Arabidopside D)*
lipid0341	DGDG 18:5;O2_16:4;O*	DGDG(18:5-2O/16:4-O)*
lipid0164	DGDG 34:3	DGDG(34:3)
lipid0163	DGDG 34:4	DGDG(34:4)
lipid0162	DGDG 34:5	DGDG(34:5)
lipid0161	DGDG 34:6	DGDG(34:6)
lipid0170	DGDG 36:3	DGDG(36:3)
lipid0169	DGDG 36:4	DGDG(36:4)
lipid0168	DGDG 36:5	DGDG(36:5)
lipid0167	DGDG 36:6	DGDG(36:6)
lipid0175	DGDG 38:4 or DGDG 36:6;O2	DGDG(38:4) or DGDG(36:6-2O)
lipid0174	DGDG 38:5 or DGDG 36:7;O2	DGDG(38:5) or DGDG(36:7-2O)
lipid0173	DGDG 38:6 or DGDG 36:8;O2	DGDG(38:6) or DGDG(36:8-2O)
lipid0157	DGMG 16:0	DGMG(16:0)
lipid0156	DGMG 16:3	DGMG(16:3)
lipid0158	DGMG 16:4;O	DGMG(16:4-O)
lipid0159	DGMG 18:3	DGMG(18:3)
lipid0160	DGMG 18:4;O	DGMG(18:4-O)
lipid0209	GIPC 42:1;O3	GIPC(42:1)-2
lipid0210	GIPC 42:1;O4	GIPC(42:1)-3
lipid0212	GIPC 42:2;O4	GIPC(42:2)-3
lipid0226	Hex-Cer 34:1;O3	GlcCer(34:1)-2
lipid0227	Hex-Cer 34:1;O4	GlcCer(34:1)-3
lipid0233	Hex-Cer 40:1;O4	GlcCer(40:1)-3
lipid0237	Hex-Cer 42:2;O4	GlcCer(42:2)-3
lipid0800	LPA 18:3	LPA(18:3)
lipid0025	LPC 16:0	LPC(16:0)
lipid0029	LPC 18:0**	LPC(18:0)**
lipid0028	LPC 18:1*	LPC(18:1)*
lipid0027	LPC 18:2	LPC(18:2)
lipid0026	LPC 18:3	LPC(18:3)
lipid0052	LPE 16:0	LPE(16:0)
lipid0055	LPE 18:1*	LPE(18:1)*
lipid0054	LPE 18:2	LPE(18:2)
lipid0053	LPE 18:3	LPE(18:3)
lipid0001	LPG 16:1	LPG(16:1)
lipid0005	LPG 18:1	LPG(18:1)
lipid0004	LPG 18:2	LPG(18:2)
lipid0006	LPG 18:4;O	LPG(18:4-O)
lipid0792	LPI 16:0	LPI(16:0)
lipid0794	LPI 18:2	LPI(18:2)
lipid0793	LPI 18:3	LPI(18:3)
lipid0796	LPS 16:0**	LPS(16:0)**
lipid0798	LPS 18:2**	LPS(18:2)**
lipid0797	LPS 18:3**	LPS(18:3)**
lipid0424	MGDG 18:2;O3_18:3	MGDG(18:2-3O/18:3)
lipid0435	MGDG 18:2;O_16:3*	MGDG(18:2-O/16:3)*
lipid0437	MGDG 18:2;O_18:3*	MGDG(18:2-O/18:3)*
lipid0327	MGDG 18:3_16:3;O2*	MGDG(18:3/16:3-2O)*
lipid0637	MGDG 18:3_16:3;O*	MGDG(18:3/16:3-O)*
lipid0323	MGDG 18:3_16:4;O	MGDG(18:3/16:4-O)
lipid0838	MGDG 18:3_7:1;O2*	MGDG(18:3/7:1-2O)*
lipid0837	MGDG 18:3_7:1;O*	MGDG(18:3/7:1-O)*
lipid0836	MGDG 18:3_9:1;O2*	MGDG(18:3/9:1-2O)*
lipid0370	MGDG 18:3;O2_16:3*	MGDG(18:3-2O/16:3)*
lipid0374	MGDG 18:3;O2_16:4;O (18:4;O as fragment)*	MGDG(18:3-2O/16:4-O) (18:4-O as fragment)*
lipid0330	MGDG 18:3;O2_16:4;O or MGDG 20:1_16:4;O (16:4;O as fragment)**	MGDG(18:3-2O/16:4-O) or MGDG(20:1/16:4-O) (16:4-O as fragment)**
lipid0383	MGDG 18:3;O2_18:3;O**	MGDG(18:3-2O/18:3-O)**
lipid0318	MGDG 18:3;O3_16:3**	MGDG(18:3-3O/16:3)**
lipid0419	MGDG 18:3;O3_18:3*	MGDG(18:3-3O/18:3)*
lipid0623	MGDG 18:3;O_16:3*	MGDG(18:3-O/16:3)*
lipid0625	MGDG 18:3;O_16:4;O*	MGDG(18:3-O/16:4-O)*
lipid0626	MGDG 18:3;O_18:3	MGDG(18:3-O/18:3)
lipid0609	MGDG 18:4;O2_16:3*	MGDG(18:4-2O/16:3)*
lipid0329	MGDG 18:4;O2_16:4;O or MGDG 20:2_16:4;O**	MGDG(18:4-2O/16:4-O) or MGDG(20:2/16:4-O)**
lipid0611	MGDG 18:4;O2_18:3**	MGDG(18:4-2O/18:3)**
lipid0317	MGDG 18:4;O3_16:3**	MGDG(18:4-3O/16:3)**
lipid0358	MGDG 18:4;O_16:3	MGDG(18:4-O/16:3)
lipid0362	MGDG 18:4;O_16:3;O*	MGDG(18:4-O/16:3-O)*
lipid0325	MGDG 18:4;O_16:4;O (16:4;O as fragment; Arabidopside A)	MGDG(18:4-O/16:4-O) (16:4-O as fragment; Arabidopside A)
lipid0361	MGDG 18:4;O_16:4;O (18:4;O as fragment; Arabidopside A)	MGDG(18:4-O/16:4-O) (18:4-O as fragment; Arabidopside A)
lipid0366	MGDG 18:4;O_18:1 or MGDG 18:4;O_16:3;O2*	MGDG(18:4-O/18:1) or MGDG(18:4-O/16:3-2O)*
lipid0372	MGDG 18:4;O_18:3	MGDG(18:4-O/18:3)
lipid0382	MGDG 18:4;O_18:3;O2 or MGDG 18:4;O_20:3*	MGDG(18:4-O/18:3-2O) or MGDG(18:4-O/20:3)*
lipid0385	MGDG 18:4;O_18:3;O3**	MGDG(18:4-O/18:3-3O)**
lipid0386	MGDG 18:4;O_18:3;O4**	MGDG(18:4-O/18:3-4O)**
lipid0376	MGDG 18:4;O_18:3;O*	MGDG(18:4-O/18:3-O)*
lipid0381	MGDG 18:4;O_18:4;O2**	MGDG(18:4-O/18:4-2O)**
lipid0384	MGDG 18:4;O_18:4;O3 or MGDG 18:4;O_19:3;O2**	MGDG(18:4-O/18:4-3O) or MGDG(18:4-O/19:3-2O)**
lipid0375	MGDG 18:4;O_18:4;O (Arabidopside B)*	MGDG(18:4-O/18:4-O) (Arabidopside B)*
lipid0833	MGDG 18:4;O_9:1;O	MGDG(18:4-O/9:1-O)
lipid0316	MGDG 18:5;O2_16:3*	MGDG(18:5-2O/16:3)*
lipid0328	MGDG 18:5;O2_16:4;O or MGDG 20:3_16:4;O**	MGDG(18:5-2O/16:4-O) or MGDG(20:3/16:4-O)**
lipid0380	MGDG 18:5;O2_18:4;O or MGDG 20:3_18:4;O*	MGDG(18:5-2O/18:4-O) or MGDG(20:3/18:4-O)*
lipid0139	MGDG 30:5;O2	MGDG(30:5-2O)
lipid0137	MGDG 30:6;O2	MGDG(30:6-2O)
lipid0138	MGDG 30:6;O	MGDG(30:6-O)
lipid0143	MGDG 34:3	MGDG(34:3)
lipid0142	MGDG 34:4	MGDG(34:4)
lipid0141	MGDG 34:5	MGDG(34:5)
lipid0140	MGDG 34:6	MGDG(34:6)
lipid0808	MGDG 35:3	MGDG(35:3)
lipid0149	MGDG 36:3	MGDG(36:3)
lipid0148	MGDG 36:4 or MGDG 34:6;O2	MGDG(36:4) or MGDG(34:6-2O)
lipid0147	MGDG 36:5 or MGDG 34:7;O2	MGDG(36:5) or MGDG(34:7-2O)
lipid0146	MGDG 36:6 or MGDG 34:8;O2	MGDG(36:6) or MGDG(34:8-2O)
lipid0154	MGDG 38:4 or MGDG 36:6;O2	MGDG(38:4) or MGDG(36:6-2O)
lipid0153	MGDG 38:5 or MGDG 36:7;O2	MGDG(38:5) or MGDG(36:7-2O)
lipid0152	MGDG 38:6 or MGDG 36:8;O2	MGDG(38:6) or MGDG(36:8-2O)
lipid0834	MGDG 9:1;O2_16:3*	MGDG(9:1-2O/16:3)*
lipid0831	MGDG 9:1;O_16:3*	MGDG(9:1-O/16:3) *
lipid0133	MGMG 16:0	MGMG(16:0)
lipid0132	MGMG 16:3	MGMG(16:3)
lipid0134	MGMG 16:4;O	MGMG(16:4-O)
lipid0135	MGMG 18:3	MGMG(18:3)
lipid0136	MGMG 18:4;O	MGMG(18:4-O)
lipid0126	PA 34:1	PA(34:1)
lipid0125	PA 34:2	PA(34:2)
lipid0124	PA 34:3	PA(34:3)
lipid0123	PA 34:4	PA(34:4)
lipid0122	PA 34:5*	PA(34:5)*
lipid0121	PA 34:6	PA(34:6)
lipid0131	PA 36:2	PA(36:2)
lipid0130	PA 36:3	PA(36:3)
lipid0129	PA 36:4	PA(36:4)
lipid0128	PA 36:5	PA(36:5)
lipid0127	PA 36:6	PA(36:6)
lipid0436	PC 16:0_18:2;O*	PC(16:0/18:2-O)*
lipid0371	PC 16:0_18:3;O2*	PC(16:0/18:3-2O)*
lipid0624	PC 16:0_18:3;O	PC(16:0/18:3-O)
lipid0610	PC 16:0_18:4;O2**	PC(16:0/18:4-2O)**
lipid0379	PC 18:2_18:3;O2*	PC(18:2/18:3-2O)*
lipid0628	PC 18:2_18:3;O*	PC(18:2/18:3-O)*
lipid0439	PC 18:2;O_18:2*	PC(18:2-O/18:2)*
lipid0438	PC 18:2;O_18:3*	PC(18:2-O/18:3)*
lipid0378	PC 18:3_18:3;O2*	PC(18:3/18:3-2O)*
lipid0627	PC 18:3_18:3;O*	PC(18:3/18:3-O)*
lipid0421	PC 18:3;O3_18:2*	PC(18:3-3O/18:2)*
lipid0420	PC 18:3;O3_18:3*	PC(18:3-3O/18:3)*
lipid0613	PC 18:4;O2_18:2**	PC(18:4-2O/18:2)**
lipid0030	PC 32:0**	PC(32:0)**
lipid0841	PC 32:1	PC(32:1)
lipid0840	PC 32:3	PC(32:3)
lipid0035	PC 34:1	PC(34:1)
lipid0034	PC 34:2	PC(34:2)
lipid0033	PC 34:3	PC(34:3)
lipid0032	PC 34:4	PC(34:4)
lipid0842	PC 34:6	PC(34:6)
lipid0040	PC 36:2	PC(36:2)
lipid0039	PC 36:3	PC(36:3)
lipid0038	PC 36:4	PC(36:4)
lipid0037	PC 36:5	PC(36:5)
lipid0036	PC 36:6	PC(36:6)
lipid0046	PC 38:2	PC(38:2)
lipid0045	PC 38:3	PC(38:3)
lipid0044	PC 38:4	PC(38:4)
lipid0043	PC 38:5	PC(38:5)
lipid0042	PC 38:6	PC(38:6)
lipid0050	PC 40:2*	PC(40:2)*
lipid0049	PC 40:3*	PC(40:3)*
lipid0048	PC 40:4*	PC(40:4)*
lipid0047	PC 40:5*	PC(40:5)*
lipid0427	PE 16:0_18:2;O	PE(16:0/18:2-O)
lipid0355	PE 16:0_18:3;O2*	PE(16:0/18:3-2O)*
lipid0413	PE 16:0_18:3;O3	PE(16:0/18:3-3O)
lipid0618	PE 16:0_18:3;O	PE(16:0/18:3-O)
lipid0604	PE 16:0_18:4;O2*	PE(16:0/18:4-2O)*
lipid0349	PE 16:0;O_18:2	PE(16:0-O/18:2)
lipid0428	PE 18:1;O2_16:0*	PE(18:1-2O/16:0)*
lipid0434	PE 18:1;O2_18:2*	PE(18:1-2O/18:2)*
lipid0433	PE 18:1;O2_18:3*	PE(18:1-2O/18:3)*
lipid0360	PE 18:2_18:3;O2*	PE(18:2/18:3-2O)*
lipid0415	PE 18:2_18:3;O3	PE(18:2/18:3-3O)
lipid0620	PE 18:2_18:3;O	PE(18:2/18:3-O)
lipid0430	PE 18:2;O_18:2	PE(18:2-O/18:2)
lipid0429	PE 18:2;O_18:3	PE(18:2-O/18:3)
lipid0359	PE 18:3_18:3;O2*	PE(18:3/18:3-2O)*
lipid0414	PE 18:3_18:3;O3	PE(18:3/18:3-3O)
lipid0619	PE 18:3_18:3;O*	PE(18:3/18:3-O)*
lipid0606	PE 18:4;O2_18:2*	PE(18:4-2O/18:2) *
lipid0605	PE 18:4;O2_18:3*	PE(18:4-2O/18:3)*
lipid0060	PE 32:0*	PE(32:0)*
lipid0059	PE 32:1	PE(32:1)
lipid0057	PE 32:3	PE(32:3)
lipid0063	PE 34:2	PE(34:2)
lipid0062	PE 34:3	PE(34:3)
lipid0061	PE 34:4	PE(34:4)
lipid0069	PE 36:2	PE(36:2)
lipid0068	PE 36:3	PE(36:3)
lipid0067	PE 36:4	PE(36:4)
lipid0066	PE 36:5	PE(36:5)
lipid0065	PE 36:6	PE(36:6)
lipid0807	PE 38:2	PE(38:2)
lipid0074	PE 38:3	PE(38:3)
lipid0073	PE 38:4	PE(38:4)
lipid0072	PE 38:5	PE(38:5)
lipid0076	PE 40:2	PE(40:2)
lipid0075	PE 40:3	PE(40:3)
lipid0079	PE 42:2	PE(42:2)
lipid1003	PE 42:3 (measured in negative mode)	PE(42:3) (measured in negative mode)
lipid0078	PE 42:3 (measured in positive mode)	PE(42:3) (measured in positive mode)
lipid0353	PG 18:2_16:0;O	PG(18:2/16:0-O)
lipid0432	PG 18:2;O_16:0*	PG(18:2-O/16:0)*
lipid0431	PG 18:2;O_16:1*	PG(18:2-O/16:1)*
lipid0417	PG 18:3;O3_16:0*	PG(18:3-3O/16:0)*
lipid0622	PG 18:3;O_16:0	PG(18:3-O/16:0)
lipid0621	PG 18:3;O_16:1	PG(18:3-O/16:1)
lipid0357	PG 18:4;O_16:0	PG(18:4-O/16:0)
lipid0356	PG 18:4;O_16:1	PG(18:4-O/16:1)
lipid0364	PG 18:4;O_18:2*	PG(18:4-O/18:2)*
lipid0363	PG 18:4;O_18:3*	PG(18:4-O/18:3)*
lipid0008	PG 32:0	PG(32:0)
lipid0007	PG 32:1	PG(32:1)
lipid0012	PG 34:1	PG(34:1)
lipid0011	PG 34:2	PG(34:2)
lipid0023	PG 34:2;O*	PG(34:2-O)*
lipid0010	PG 34:3	PG(34:3)
lipid0022	PG 34:3;O	PG(34:3-O)
lipid0009	PG 34:4	PG(34:4)
lipid0021	PG 34:4;O	PG(34:4-O)
lipid0020	PG 34:5;O*	PG(34:5-O)*
lipid0018	PG 36:2	PG(36:2)
lipid0017	PG 36:3	PG(36:3)
lipid0016	PG 36:4	PG(36:4)
lipid0015	PG 36:5	PG(36:5)
lipid0014	PG 36:6	PG(36:6)
lipid0086	PI 34:2	PI(34:2)
lipid1001	PI 34:3 (measured in negative mode)	PI(34:3) (measured in negative mode)
lipid0085	PI 34:3 (measured in positive mode)	PI(34:3) (measured in positive mode)
lipid0095	PS 34:3	PS(34:3)
lipid0116	PS 42:2	PS(42:2)
lipid0115	PS 42:3	PS(42:3)
lipid0819	Campesterol 18:2**	Campesterol(18:2)**
lipid0287	Campesterol 18:3**	Campesterol(18:3)**
lipid0825	Campesterol 18:4;O**	Campesterol(18:4-O)**
lipid0248	Campesterol-Hex	Campesterol-Glc
lipid0255	Campesterol-Hex 16:0	Campesterol-Glc(16:0)
lipid0261	Campesterol-Hex 18:2	Campesterol-Glc(18:2)
lipid0258	Campesterol-Hex 18:3	Campesterol-Glc(18:3)
lipid0816	Campesterol-Hex 18:4;O	Campesterol-Glc(18:4-O)
lipid0821	Sitosterol 18:2*	Sitosterol(18:2)*
lipid0289	Sitosterol 18:3*	Sitosterol(18:3)*
lipid0827	Sitosterol 18:4;O**	Sitosterol(18:4-O)**
lipid0250	Sitosterol-Hex	Sitosterol-Glc
lipid0257	Sitosterol-Hex 16:0	Sitosterol-Glc(16:0)
lipid0263	Sitosterol-Hex 18:2	Sitosterol-Glc(18:2)
lipid0260	Sitosterol-Hex 18:3	Sitosterol-Glc(18:3)
lipid0818	Sitosterol-Hex 18:4;O	Sitosterol-Glc(18:4-O)
lipid0820	Stigmasterol 18:2**	Stigmasterol(18:2)**
lipid0288	Stigmasterol 18:3**	Stigmasterol(18:3)**
lipid0826	Stigmasterol 18:4;O**	Stigmasterol(18:4-O)**
lipid0249	Stigmasterol-Hex	Stigmasterol-Glc
lipid0256	Stigmasterol-Hex 16:0	Stigmasterol-Glc(16:0)
lipid0262	Stigmasterol-Hex 18:2	Stigmasterol-Glc(18:2)
lipid0259	Stigmasterol-Hex 18:3	Stigmasterol-Glc(18:3)
lipid0817	Stigmasterol-Hex 18:4;O	Stigmasterol-Glc(18:4-O)
lipid0182	SQDG 32:0	SQDG(32:0)
lipid0186	SQDG 34:3	SQDG(34:3)
lipid0189	SQDG 36:6	SQDG(36:6)
lipid0177	SQMG 16:0	SQMG(16:0)
lipid0178	SQMG 18:3	SQMG(18:3)
lipid0280	TG 18:2_36:5	TAG(18:2/36:5)
lipid0276	TG 18:3_34:2*	TAG(18:3/34:2)*
lipid0278	TG 18:3_36:5	TAG(18:3/36:5)
lipid0277	TG 18:3_36:6	TAG(18:3/36:6)
lipid0305	TeGDG 34:6	TeGDG(34:6)
lipid0309	TeGDG 36:6	TeGDG(36:6)
lipid0294	TrGDG 34:6	TrGDG(34:6)
lipid0298	TrGDG 36:6	TrGDG(36:6)

## Sheet: Table S5
Table S5. Significant correlations of lipids from wild-type plants from various time points with final ion leakage, average amounts of rosette lipids in plants at selected time points and treatments, and ratios of lipid levels from non-acclimated plants over control plants and acclimated plants over control plants at time points after treatments. Columns E through I indicate Spearman's correlatio…
Lipid number	Group	Class, oxidation	Lipid name	Significant Spearman's correlations of lipids of non-acclimated and acclimated plants at 72 h (end of cold acclimation, trays 4 and 5) with ion leakage at 98 h (trays 16 and 17)	Significant Spearman's correlations of lipids of non-acclimated and acclimated plants at 74 h (end of freezing treatment, trays 7 and 8) with ion leakage at 98 h (trays 16 and 17)	Significant Spearman's correlations of lipids of non-acclimated and acclimated plants at 75 h (1 h after end of freezing treatment, trays 10 and 11) with ion leakage at 98 h (trays 16 and 17)	Significant Spearman's correlations of lipids of non-acclimated and acclimated plants at 77 h (3 h after end of freezing treatment, trays 13 and 14) with ion leakage at 98 h (trays 16 and 17)	Significant Spearman's correlations of lipids of non-acclimated and acclimated plants at 98 h (24 h after end of freezing treatment, trays 16 and 17) with ion leakage at 98 h (trays 16 and 17)	Average of control and non-acclimated, which are the same, at 72 h (tray 4)	Average of acclimated at 72 h (end of cold acclimation; tray 5)	Average of control at 74 h (tray 6)	Average of non-acclimated at 74 h (right after freezing treatment; tray 7)	Average of acclimated at 74 h (right after freezing treatment; tray 8)	Average of control at 75 h (tray 9)	Average of non-acclimated at 75 h (1 h after freezing treatment; tray 10)	Average of acclimated at 75 h (1 h after freezing treatment; tray 11)	Average of control at 77 h (tray 12)	Average of non-acclimated at 77 h (3 h after freezing treatment; tray 13)	Average of acclimated at 77 h (3 h after freezing treatment; tray 14)	Average of control at 98 h (tray 15)	Average of non-acclimated at 98 h (24 h after freezing treatment; tray 16)	Average of acclimated at 98 h (24 h after freezing treatment; tray 17)	72 h non-acclimated/control	72 h (end of cold acclimation) acclimated/control	74 h (end of freezing treatment) non-acclimated/control	74 h (end of freezing treatment) acclimated/control	75 h (1 h after end of freezing treatment) non-acclimated/control	75 h (1 h after end of freezing treatment) acclimated/control	77 h (3 h after end of freezing treatment) non-acclimated/control	77 h (3 h after end of freezing treatment) acclimated/control	98 h (24 h after end of freezing treatment) non-acclimated/control	98 h (24 h after end of freezing treatment) acclimated/control
lipid0164	polar structural lipids	DGDG, non-oxidized	DGDG 34:3					-0.84402	14730.2	14661.8	15658.5	16286	14449.5	14752.3	10119.6	11764	16899.4	9520.62	9310.19	17560.3	5855.96	11320.3	1	0.995358	1.04008	0.922795	0.685964	0.797432	0.563371	0.550919	0.333478	0.644655
lipid0163	polar structural lipids	DGDG, non-oxidized	DGDG 34:4			-0.51094		-0.82317	874.93	869.076	876.614	903.132	915.015	728.358	506.386	766.257	933.527	514.929	662.294	747.997	350.201	620.771	1	0.993309	1.03025	1.04381	0.695244	1.05203	0.551595	0.709453	0.468185	0.829912
lipid0162	polar structural lipids	DGDG, non-oxidized	DGDG 34:5			-0.48726		-0.84324	1703.64	1762.79	1727.05	1866.47	1873.87	1466.92	1039.37	1564.75	1815.93	1019.78	1308.57	1471.53	663.265	1318.56	1	1.03472	1.08072	1.08501	0.708538	1.06669	0.561574	0.720605	0.450733	0.896047
lipid0161	polar structural lipids	DGDG, non-oxidized	DGDG 34:6		-0.34668	-0.57452		-0.79125	7333.24	8450.15	7474.08	9447.25	10836.5	6002.75	5040.38	8040.58	7227.56	5369.4	6756.88	6097.5	3273.5	6623.09	1	1.15231	1.264	1.44988	0.839679	1.33948	0.742906	0.934876	0.536859	1.0862
lipid0170	polar structural lipids	DGDG, non-oxidized	DGDG 36:3			-0.42214		-0.83552	1041.06	999.71	1157.35	1179.53	999.746	1046.22	688.112	841.181	1195.79	705.58	683.31	1195.95	417.92	733.223	1	0.960283	1.01917	0.863827	0.657712	0.804019	0.590054	0.571431	0.349446	0.613088
lipid0169	polar structural lipids	DGDG, non-oxidized	DGDG 36:4			-0.58069		-0.81004	2087.4	2077.87	2029.48	2053.27	2121.74	1668.41	1168.75	1776.38	2138.68	1289.47	1458.3	1857.98	833.611	1432.79	1	0.995433	1.01172	1.04546	0.700515	1.06472	0.602927	0.681867	0.448666	0.771154
lipid0168	polar structural lipids	DGDG, non-oxidized	DGDG 36:5		0.36196	-0.5462	0.39188	-0.75701	4572.76	4175.24	5046.29	4763.37	4114.59	3702.77	2635.35	3683.57	4627.76	3410.25	3020.02	4102.52	1997.37	2730.66	1	0.913068	0.943935	0.815368	0.711722	0.994815	0.736913	0.652588	0.486864	0.665605
lipid0167	polar structural lipids	DGDG, non-oxidized	DGDG 36:6	-0.52767		-0.54311		-0.85869	81250	90295.7	84454	83586.8	88910.6	73345.5	47614.3	73186.8	85094.4	46958.4	59876.8	80874.4	29599.8	68651.2	1	1.11133	0.989732	1.05277	0.649177	0.997836	0.551838	0.703652	0.365997	0.848862
lipid0174	polar structural lipids	DGDG, ambiguous	DGDG 38:5 or DGDG 36:7;O2	-0.54517	-0.4356	-0.62651		-0.85405	164.875	204.574	174.911	174.101	223.42	144.378	103.248	196.039	194.396	116.492	157.234	155.522	71.2306	157.969	1	1.24078	0.995368	1.27734	0.715122	1.35782	0.599253	0.808835	0.458008	1.01573
			total non-oxidized DGDG						113758	123497	118598	120260	124445	102858	68915.4	101820	120127	68904.9	83233.6	114064	43062.9	93588.6	1	1.08561	1.01401	1.0493	0.670008	0.989908	0.573598	0.692878	0.377534	0.820494
lipid0143	polar structural lipids	MGDG, non-oxidized	MGDG 34:3	0.39048	0.4518	-0.36268		-0.8816	8466.66	6088.81	9560	7936.72	5697.29	8476.06	3277.21	4822.26	11520.2	3456.12	4656.61	9425.68	2496.05	6527.75	1	0.719151	0.830201	0.595951	0.386643	0.568927	0.300004	0.404211	0.264814	0.69255
lipid0142	polar structural lipids	MGDG, non-oxidized	MGDG 34:4	0.35393	0.39343	-0.3897		-0.87825	18175.6	14126.9	21000.3	16367.3	12383.7	17854	5982.98	10601.7	27207.1	6089.42	10850.8	17523.2	4160.62	14630.5	1	0.777245	0.779381	0.58969	0.335106	0.593798	0.223818	0.398824	0.237435	0.834921
lipid0141	polar structural lipids	MGDG, non-oxidized	MGDG 34:5	0.50553	0.52605			-0.87362	37007.9	24937	39047.2	33502	22803.1	34510.5	12659.2	18917.6	50183.7	12809.9	19298.6	33764.1	7573.09	27902.9	1	0.67383	0.857987	0.583989	0.366821	0.548169	0.25526	0.384559	0.224294	0.826407
lipid0140	polar structural lipids	MGDG, non-oxidized	MGDG 34:6	-0.35882		-0.41956		-0.86075	608676	619322	605902	530672	557211	545778	209510	410104	655050	200268	349626	598581	139606	468123	1	1.01749	0.875838	0.919638	0.383875	0.751411	0.305729	0.533739	0.233229	0.782055
lipid0808	polar structural lipids	MGDG, non-oxidized	MGDG 35:3		-0.3534	-0.60515		-0.82162	224.482	240.431	214.151	222.899	271.102	192.757	136.201	243.118	240.51	130.936	215.016	194.505	109.565	179.87	1	1.07105	1.04085	1.26594	0.706596	1.26127	0.544412	0.894002	0.563303	0.924756
lipid0149	polar structural lipids	MGDG, non-oxidized	MGDG 36:3		0.37754	-0.43269		-0.86744	1015.77	855.195	1175.94	992.485	831.499	1002.09	443.101	739.107	1284.42	487.79	662.026	1108.99	317.773	732.96	1	0.841914	0.843991	0.707092	0.442179	0.737569	0.379775	0.515429	0.286543	0.660925
lipid0148	polar structural lipids	MGDG, ambiguous	MGDG 36:4 or MGDG 34:6;O2	0.50528	0.54286	-0.4592		-0.88803	7775.36	5486.74	8723.87	7038.2	5253.22	7113.91	3001	4601.18	9439.07	3463.66	3900.64	7529.33	2287.95	5461.43	1	0.705657	0.806775	0.602166	0.421849	0.646787	0.366949	0.413244	0.303872	0.725354
lipid0147	polar structural lipids	MGDG, ambiguous	MGDG 36:5 or MGDG 34:7;O2	0.55598	0.57922			-0.86332	26090.4	15714.9	29286.8	23821.2	14100.3	23935.1	10019.2	12286.5	29333.8	12456.6	10720.7	26754	7922.33	18916.3	1	0.602324	0.813378	0.481458	0.4186	0.513326	0.424648	0.365471	0.296118	0.707047
lipid0146	polar structural lipids	MGDG, ambiguous	MGDG 36:6 or MGDG 34:8;O2		0.34545	-0.33076		-0.88288	232076	189987	225275	222330	178566	216146	99495.5	137948	244946	93470.5	111921	246059	67444.5	176538	1	0.818642	0.986925	0.792656	0.460316	0.638217	0.381597	0.456923	0.274099	0.717461
lipid0153	polar structural lipids	MGDG, ambiguous	MGDG 38:5 or MGDG 36:7;O2			-0.5825		-0.85405	349.747	323.648	361.94	329.954	357.407	314.843	177.605	332.837	424.218	199.328	294.389	335.717	128.626	360.504	1	0.925379	0.911627	0.987477	0.564108	1.05715	0.469873	0.693958	0.383139	1.07383
			total non-oxidized MGDG						939857	877082	940547	843213	797474	855323	344702	600596	1.02963e+06	332832	512146	941275	232047	719373	1	0.933208	0.896513	0.847883	0.403008	0.702186	0.323254	0.497408	0.246524	0.764254
lipid0182	polar structural lipids	SQDG, non-oxidized	SQDG 32:0						89.823	54.863	60.7067	57.6304	67.6674	52.0741	49.1211	50.3675	56.9721	48.5411	44.7842	51.0648	54.8204	41.4541	1	0.61079	0.949327	1.11466	0.943292	0.967227	0.852015	0.786073	1.07355	0.811794
lipid0186	polar structural lipids	SQDG, non-oxidized	SQDG 34:3		-0.40443	-0.39176		-0.43449	2032.21	1644.63	1618.19	1654.37	2050.36	1446.15	1357.07	1535.58	1583.06	1224.31	1252.73	1477.66	1136.3	1279.06	1	0.809281	1.02236	1.26707	0.938402	1.06184	0.773382	0.791335	0.768985	0.865601
lipid0189	polar structural lipids	SQDG, non-oxidized	SQDG 36:6		-0.38671	-0.42523		-0.66589	577.475	463.004	440.151	455.429	565.733	391.764	346.035	416.946	422.368	316.377	331.556	395.522	259.023	367.081	1	0.801773	1.03471	1.28532	0.883275	1.06428	0.749057	0.784993	0.654888	0.928094
			total non-oxidized SQDG						2699.5	2162.49	2119.04	2167.43	2683.76	1889.99	1752.23	2002.9	2062.4	1589.23	1629.07	1924.24	1450.14	1687.6	1	0.80107	1.02283	1.2665	0.92711	1.05974	0.770572	0.789891	0.753615	0.877019
lipid0008	polar structural lipids	PG, non-oxidized	PG 32:0	0.35109				-0.80901	466.891	335.798	434.398	402.751	348.719	356.644	278.719	296.739	382.911	299.908	290.214	401.102	219.131	338.877	1	0.719222	0.927146	0.802763	0.781505	0.83203	0.783231	0.757915	0.546323	0.844866
lipid0007	polar structural lipids	PG, non-oxidized	PG 32:1					-0.75547	501.488	384.137	474.569	434.119	363.164	386.95	294.318	314.999	481.818	270.98	297.963	434.944	220.614	303.983	1	0.765994	0.914765	0.76525	0.760609	0.814057	0.562412	0.618415	0.507223	0.698901
lipid0012	polar structural lipids	PG, non-oxidized	PG 34:1			-0.61725		-0.84762	1891.67	1971.46	1971.99	1669.12	1657.87	1828.32	1011.72	1591.33	2412.61	1059.65	1497.29	1845.11	810.481	1609.19	1	1.04218	0.846415	0.840706	0.553358	0.870378	0.439213	0.620612	0.439258	0.872136
lipid0011	polar structural lipids	PG, non-oxidized	PG 34:2	-0.49987	-0.47624	-0.58172		-0.88237	3531.13	4076.74	3302.97	3227.43	3837.24	3182.91	2167.7	3393.14	3879.5	2070.11	2908.38	3365.09	1350.8	2945.98	1	1.15452	0.977128	1.16175	0.681043	1.06605	0.533601	0.749679	0.401415	0.875453
lipid0010	polar structural lipids	PG, non-oxidized	PG 34:3	-0.61828	-0.50313	-0.54106	-0.34062	-0.89035	7409.11	8343.88	6450.41	6523.69	8034.03	6403.11	4392.91	6734.48	7140.05	4028.35	6002	6616.66	2851.42	7122.62	1	1.12616	1.01136	1.24551	0.686059	1.05175	0.564191	0.84061	0.430945	1.07647
lipid0009	polar structural lipids	PG, non-oxidized	PG 34:4			-0.36885		-0.87284	11314	10873.8	10712.5	10491.2	10387.4	10730.4	6829.52	8706.04	12311.9	5391.76	7372.95	11314.4	3902.99	8439.77	1	0.961089	0.979343	0.969652	0.636466	0.811345	0.437932	0.598849	0.344958	0.745932
lipid0018	polar structural lipids	PG, non-oxidized	PG 36:2			-0.38198		-0.76062	55.2966	52.1943	68.5623	53.9022	61.124	39.413	36.8237	51.5878	59.3176	42.605	51.1564	41.8492	26.5525	47.5714	1	0.943898	0.786179	0.89151	0.934304	1.3089	0.718252	0.862415	0.63448	1.13673
lipid0017	polar structural lipids	PG, non-oxidized	PG 36:3	-0.50399	-0.48633	-0.50837	-0.36443	-0.83192	80.4836	93.8605	81.3176	71.1224	91.8038	71.8887	55.2702	85.338	97.4178	59.0821	83.6711	66.3835	35.2741	80.5642	1	1.16621	0.874625	1.12895	0.76883	1.18709	0.606481	0.858889	0.531368	1.21362
lipid0016	polar structural lipids	PG, non-oxidized	PG 36:4	-0.71609	-0.58136	-0.45019	-0.43193	-0.84067	110.665	161.164	116.429	104.098	163.69	101.246	92.4	150.086	144.418	93.7235	141.641	91.5402	47.5442	104.35	1	1.45633	0.894093	1.40592	0.912627	1.48239	0.648974	0.98077	0.519381	1.13994
lipid0015	polar structural lipids	PG, non-oxidized	PG 36:5	-0.69292	-0.60092	-0.49936	-0.41541	-0.80335	110.693	188.958	110.168	101.638	184.19	95.8211	103.155	188.155	135.021	110.867	169.852	89.9877	56.6527	119.641	1	1.70705	0.922573	1.6719	1.07654	1.96361	0.821113	1.25797	0.62956	1.32953
lipid0014	polar structural lipids	PG, non-oxidized	PG 36:6	-0.59176	-0.51383	-0.52149	-0.42773	-0.85792	144.244	191.597	128.943	127.977	182.168	125.367	103.14	180.644	149.222	114.595	171.893	120.875	70.4429	164.523	1	1.32829	0.992506	1.41277	0.822701	1.44092	0.76795	1.15193	0.582775	1.3611
			total non-oxidized PG						25615.7	26673.6	23852.2	23207	25311.4	23322.1	15365.7	21692.5	27194.1	13541.6	18987	24387.9	9591.9	21277.1	1	1.0413	0.97295	1.06117	0.658847	0.93013	0.497961	0.698202	0.393305	0.872442
lipid0030	polar structural lipids	PC, non-oxidized	PC 32:0**				-0.49955		10.315	3.66935	9.62013	11.3227	6.54121	11.1142	10.584	9.36726	19.4229	7.09998	103.078	15.7667	6.08112	6.34771	1	0.355729	1.17698	0.67995	0.952299	0.842821	0.365546	5.307	0.385693	0.402601
lipid0841	polar structural lipids	PC, non-oxidized	PC 32:1	0.46384				-0.8453	70.9127	40.3505	60.441	37.1116	34.7408	56.5139	27.7587	31.3432	60.2205	29.5369	69.874	52.4713	19.982	45.6841	1	0.569016	0.614013	0.574788	0.491183	0.55461	0.490479	1.1603	0.380817	0.870649
lipid0840	polar structural lipids	PC, non-oxidized	PC 32:3			-0.48468	-0.34678	-0.55109	59.6499	41.1803	46.8522	32.8726	44.6119	39.1657	32.9905	57.0682	41.2143	57.7085	85.3184	35.5862	36.3808	78.7416	1	0.690366	0.701623	0.952182	0.84233	1.4571	1.40021	2.07012	1.02233	2.2127
lipid0035	polar structural lipids	PC, non-oxidized	PC 34:1	0.48307		-0.40335		-0.85328	779.712	370.43	802.16	389.579	446.87	738.458	259.477	451.482	900.001	313.3	501.235	632.666	212.67	711.723	1	0.475085	0.485662	0.557083	0.351377	0.611385	0.34811	0.556927	0.336149	1.12496
lipid0034	polar structural lipids	PC, non-oxidized	PC 34:2		-0.34759	-0.44813		-0.86023	4832.51	4631.57	4538.2	2883.68	3699.25	4155.05	2134.25	3534.09	4864.39	2240.27	3039.44	4342.28	1353.79	3854.91	1	0.958419	0.635424	0.815135	0.513651	0.850551	0.460545	0.624835	0.311769	0.887763
lipid0033	polar structural lipids	PC, non-oxidized	PC 34:3			-0.46203		-0.85302	5287.61	4790.02	4593.3	3048.5	3794.49	4114.29	2216.27	3632.41	4512.31	2756.29	3348.41	4492.27	1863.53	4969.5	1	0.905895	0.663683	0.826092	0.538675	0.882875	0.610838	0.742062	0.41483	1.10623
lipid0032	polar structural lipids	PC, non-oxidized	PC 34:4			-0.44891	-0.39524	-0.8574	176.115	132.885	141.854	86.9322	123.939	126.183	76.7443	140.498	151.268	94.1677	158.171	121.211	60.9386	169.928	1	0.754534	0.612828	0.873707	0.608197	1.11345	0.622523	1.04563	0.50275	1.40192
lipid0842	polar structural lipids	PC, non-oxidized	PC 34:6		-0.59572	-0.54569		-0.43192	54.814	40.7853	41.0818	50.3345	142.838	31.4079	144.393	332.81	34.0297	204.173	309.946	26.1122	63.7673	98.5878	1	0.744067	1.22522	3.47691	4.59734	10.5964	5.99987	9.10812	2.44205	3.77554
lipid0040	polar structural lipids	PC, non-oxidized	PC 36:2	0.43964		-0.37014		-0.85277	641.947	479.52	644.359	339.838	360.529	604.544	239.124	370.036	757.199	265.243	382.453	532.644	160.577	412.934	1	0.746978	0.527404	0.559516	0.395544	0.612091	0.350295	0.505089	0.301471	0.775253
lipid0039	polar structural lipids	PC, non-oxidized	PC 36:3	0.35187		-0.39974		-0.86203	1771.63	1427.26	1740.12	826.547	1012.76	1551.26	608.7	1047.7	2036.88	699.928	1101.08	1385.84	462.353	1393.21	1	0.805621	0.474994	0.582007	0.39239	0.675386	0.343628	0.540572	0.333626	1.00532
lipid0038	polar structural lipids	PC, non-oxidized	PC 36:4	-0.4955	-0.39312	-0.45174	-0.39076	-0.8695	4563.57	4826.32	4312.31	2322.22	3501.39	3895.23	1839.67	3493.61	4893.37	1907.38	3214.47	3729.25	1196.59	3860.45	1	1.05757	0.538508	0.811951	0.472289	0.896895	0.389788	0.656904	0.320866	1.03518
lipid0037	polar structural lipids	PC, non-oxidized	PC 36:5	-0.45097	-0.43529	-0.4677	-0.37507	-0.86538	5988.06	6692.6	5237.05	3181.52	4969.47	4740.91	2586.69	4983.83	5527	2778.66	4534.49	4916.17	1770.29	5627.23	1	1.11766	0.607501	0.948906	0.54561	1.05124	0.502742	0.820425	0.360096	1.14464
lipid0036	polar structural lipids	PC, non-oxidized	PC 36:6		-0.38243	-0.47439	-0.3437	-0.86667	3254.44	3462.93	2639.91	1772.22	2603.09	2284.84	1457.72	2712.53	2525.95	1795.85	2680.2	2441.06	1208.16	3480.96	1	1.06407	0.671319	0.986055	0.637997	1.18719	0.710961	1.06107	0.494934	1.42601
lipid0046	polar structural lipids	PC, non-oxidized	PC 38:2			-0.35624		-0.82136	61.1662	47.4952	50.8924	29.4466	36.5834	61.6859	26.2358	38.9573	83.5204	33.9149	51.2286	65.1664	20.9035	55.7476	1	0.776494	0.578605	0.718838	0.425313	0.631543	0.406067	0.613366	0.32077	0.855465
lipid0045	polar structural lipids	PC, non-oxidized	PC 38:3			-0.37838		-0.82291	83.6544	71.2026	71.037	40.9182	54.5044	73.8564	39.3181	60.162	122.102	49.2113	76.08	82.3508	26.4737	80.463	1	0.851152	0.576013	0.767268	0.532359	0.814581	0.403035	0.623087	0.321475	0.977076
lipid0044	polar structural lipids	PC, non-oxidized	PC 38:4		-0.43193	-0.47825		-0.84556	90.8065	97.9745	81.2605	49.387	74.6037	76.5955	44.6282	84.0727	117.739	53.9139	89.3479	81.7501	27.7158	101.575	1	1.07894	0.607761	0.918081	0.582648	1.09762	0.45791	0.758863	0.339031	1.2425
lipid0043	polar structural lipids	PC, non-oxidized	PC 38:5	-0.60695	-0.47288	-0.50734	-0.4014	-0.85766	62.4159	81.1023	57.1234	35.2581	60.0158	54.5251	28.8507	66.3039	66.0882	32.4972	58.546	52.5886	19.4988	72.8123	1	1.29939	0.617227	1.05064	0.529127	1.21603	0.491726	0.885878	0.370781	1.38456
lipid0042	polar structural lipids	PC, non-oxidized	PC 38:6	-0.44324	-0.38029	-0.54955	-0.34342	-0.84633	26.3376	34.6437	23.6816	15.8959	25.6509	23.5759	14.5884	28.7613	26.3081	17.5082	28.6579	21.4971	10.83	35.2412	1	1.31537	0.671233	1.08316	0.618783	1.21994	0.665504	1.08932	0.503788	1.63934
lipid0050	polar structural lipids	PC, non-oxidized	PC 40:2*			-0.54981	-0.41261	-0.82368	10.8531	12.9062	10.9665	6.25971	9.52064	11.6657	5.23753	10.4753	12.4243	6.98017	12.9658	9.10792	4.12803	10.5759	1	1.18917	0.570803	0.868156	0.448967	0.897955	0.561817	1.04359	0.453235	1.16118
lipid0049	polar structural lipids	PC, non-oxidized	PC 40:3*	-0.35495	-0.39404	-0.5251	-0.46246	-0.81879	18.2125	25.0555	18.6037	9.67158	16.3853	18.2016	8.03651	18.1935	19.4124	9.88247	18.5221	17.1796	5.44143	18.4659	1	1.37573	0.519876	0.880757	0.441528	0.999553	0.50908	0.954135	0.316738	1.07488
lipid0048	polar structural lipids	PC, non-oxidized	PC 40:4*	-0.39846	-0.43957	-0.51429	-0.47591	-0.82368	21.9056	31.7553	20.7769	11.2958	19.4171	20.9326	8.62941	20.2592	20.7181	9.48395	18.6623	21.0101	5.75048	22.9591	1	1.44964	0.543673	0.934552	0.412248	0.96783	0.457762	0.900774	0.2737	1.09276
lipid0047	polar structural lipids	PC, non-oxidized	PC 40:5*		-0.42857	-0.56216	-0.44398	-0.81879	13.8427	18.3666	11.8681	6.75386	11.3271	12.7419	5.01339	12.2146	10.8033	6.55333	12.1628	11.4589	4.41007	14.6645	1	1.32681	0.569075	0.954412	0.393457	0.958615	0.606602	1.12583	0.38486	1.27975
			total non-oxidized PC						27880.5	27360	25153.5	15187.6	21048.5	22702.7	11814.9	21136.2	26802.4	13369.5	19894.3	23085.4	8540.27	25122.7	1	0.981333	0.603795	0.836804	0.520417	0.930996	0.49882	0.742261	0.369942	1.08825
lipid0060	polar structural lipids	PE, non-oxidized	PE 32:0*					-0.63732	11.3916	9.0381	13.4007	11.4284	13.419	11.5074	7.27343	7.34797	12.7979	6.7037	8.97931	9.03829	6.27373	8.56028	1	0.793403	0.852823	1.00136	0.632066	0.638543	0.523812	0.701623	0.694128	0.947112
lipid0059	polar structural lipids	PE, non-oxidized	PE 32:1						32.5863	22.6594	29.2681	23.1219	25.7672	25.4247	14.9036	18.7909	29.5312	17.2463	36.7685	23.3458	26.1213	24.1077	1	0.695364	0.790004	0.880386	0.586185	0.739079	0.584002	1.24507	1.11889	1.03263
lipid0057	polar structural lipids	PE, non-oxidized	PE 32:3			-0.48005		-0.57091	36.1742	30.2909	31.1546	21.7933	29.2394	23.1436	15.2687	27.8356	24.9789	27.9289	45.1719	22.1169	28.7697	66.8847	1	0.837362	0.699522	0.938527	0.659738	1.20273	1.1181	1.8084	1.3008	3.02414
lipid0063	polar structural lipids	PE, non-oxidized	PE 34:2			-0.4888		-0.89807	4546.55	4314.56	4400.77	3328.72	3946.32	3813.23	2204.65	3547.78	4414.93	2259.53	3127.45	3945.06	1371.07	4023.49	1	0.948975	0.756394	0.896733	0.578158	0.930386	0.511793	0.708381	0.347542	1.01988
lipid0062	polar structural lipids	PE, non-oxidized	PE 34:3			-0.50785		-0.87593	3664.57	3438.5	3286.06	2453.5	3018.29	2808.25	1553.71	2602.89	3209.09	1763.82	2385.78	2988.52	1266.77	3751.64	1	0.938309	0.746639	0.918514	0.553269	0.926874	0.549632	0.743445	0.42388	1.25535
lipid0061	polar structural lipids	PE, non-oxidized	PE 34:4		-0.46066	-0.58198	-0.40084	-0.80721	59.9891	68.9563	49.5986	33.716	57.0308	40.4765	25.2228	53.9894	52.321	30.5067	58.6532	40.307	25.1502	62.7243	1	1.14948	0.679776	1.14985	0.623146	1.33384	0.583067	1.12102	0.623968	1.55616
lipid0069	polar structural lipids	PE, non-oxidized	PE 36:2		0.45149			-0.88366	258.886	210.245	259.355	206.357	171.515	225.675	133.014	167.403	275.964	135.546	177.361	218.923	74.6599	175.505	1	0.812114	0.795655	0.661316	0.589408	0.74179	0.491172	0.642697	0.341032	0.801672
lipid0068	polar structural lipids	PE, non-oxidized	PE 36:3		-0.36807	-0.59254	-0.36919	-0.88468	661.235	561.166	617.185	409.655	595.682	523.301	273.748	546.041	690.649	297.158	528.245	497.932	191.28	537.332	1	0.848665	0.663747	0.965159	0.523119	1.04346	0.43026	0.764854	0.384148	1.07913
lipid0067	polar structural lipids	PE, non-oxidized	PE 36:4	-0.56088	-0.58564	-0.5861	-0.38655	-0.89318	2330.03	3034.35	2222.22	1379.78	2493.37	1890.99	994.699	2228.65	2206.33	1045.27	1907.53	1879.4	668.128	1964.77	1	1.30228	0.620902	1.12202	0.52602	1.17856	0.473761	0.864572	0.3555	1.04542
lipid0066	polar structural lipids	PE, non-oxidized	PE 36:5	-0.60721	-0.59389	-0.61338	-0.39748	-0.87825	2808.36	4031.88	2536.06	1641.02	3197.98	2173.28	1172.09	2824.92	2523.8	1263.22	2375.36	2237.37	851.274	2592.5	1	1.43567	0.647075	1.261	0.539319	1.29984	0.500524	0.941184	0.380479	1.15873
lipid0065	polar structural lipids	PE, non-oxidized	PE 36:6		-0.59633	-0.64118	-0.41793	-0.86281	1090.14	1451.9	893.949	607.344	1373.63	761.294	422.179	1194.3	898.444	495.784	995.166	815.766	375.443	1174.5	1	1.33185	0.679395	1.53659	0.554554	1.56877	0.551826	1.10766	0.460234	1.43975
lipid0807	polar structural lipids	PE, non-oxidized	PE 38:2	-0.34749		-0.45817	-0.34314	-0.87516	52.3893	52.1717	52.821	51.503	57.5639	47.8847	36.8307	50.478	53.1977	30.5332	48.2419	46.7549	17.4826	42.558	1	0.995846	0.975048	1.08979	0.769155	1.05416	0.573956	0.906842	0.373921	0.910237
lipid0074	polar structural lipids	PE, non-oxidized	PE 38:3	-0.50656		-0.53668	-0.37031	-0.86718	54.7344	60.2753	50.1436	53.0159	64.1125	46.0966	38.5253	57.1581	55.1928	32.4771	52.4622	45.693	18.5149	50.3545	1	1.10123	1.05728	1.27858	0.83575	1.23996	0.588431	0.950526	0.405201	1.10202
lipid0073	polar structural lipids	PE, non-oxidized	PE 38:4	-0.64607	-0.54836	-0.57992	-0.46022	-0.87773	48.8615	66.9696	47.2382	37.6468	60.3019	40.1787	27.2809	59.0177	52.8448	26.0938	50.5283	39.7285	15.209	54.917	1	1.3706	0.796957	1.27655	0.678989	1.46888	0.493782	0.956165	0.382824	1.38231
lipid0072	polar structural lipids	PE, non-oxidized	PE 38:5	-0.6278	-0.60061	-0.63089	-0.40364	-0.88597	48.7776	70.9668	43.9811	34.1952	61.4195	37.7078	23.8451	56.9033	49.7664	25.43	46.3809	39.6933	15.6945	55.3138	1	1.4549	0.777497	1.3965	0.632366	1.50906	0.510987	0.931971	0.395394	1.39353
lipid0076	polar structural lipids	PE, non-oxidized	PE 40:2	-0.6278	-0.45455	-0.6139	-0.39664	-0.89601	95.2431	128.347	103.844	100.493	140.176	81.2105	64.0667	127.575	96.597	61.4703	107.696	84.5554	37.7512	103.19	1	1.34757	0.967733	1.34987	0.788897	1.57092	0.636358	1.1149	0.446467	1.22038
lipid0075	polar structural lipids	PE, non-oxidized	PE 40:3	-0.71274	-0.5288	-0.66924	-0.45994	-0.90579	45.707	75.718	47.4382	55.6802	88.6814	36.9208	35.6472	77.5573	45.1067	33.6587	63.9257	39.4324	21.25	56.0088	1	1.6566	1.17374	1.86941	0.965505	2.10064	0.746201	1.41721	0.538897	1.42038
lipid0079	polar structural lipids	PE, non-oxidized	PE 42:2	-0.56577	-0.57066	-0.63243	-0.44258	-0.88108	105.384	151.087	114.727	116.515	174.712	88.7612	78.1394	156.314	105.311	75.2953	135.832	97.2035	44.643	145.893	1	1.43368	1.01559	1.52285	0.880332	1.76106	0.714978	1.28982	0.459274	1.50091
lipid1003	polar structural lipids	PE, non-oxidized	PE 42:3 (measured in negative mode)		-0.38029	-0.42857		-0.34672	129.582	97.3299	78.0931	92.5344	169.608	77.9528	72.1152	89.6163	92.0269	67.1764	70.9274	75.8827	61.1934	65.236	1	0.751107	1.18492	2.17187	0.925114	1.14962	0.729965	0.770724	0.80642	0.859694
lipid0078	polar structural lipids	PE, non-oxidized	PE 42:3 (measured in positive mode)	-0.67233	-0.60336	-0.62625	-0.48739	-0.88958	127.377	249.926	123.075	139.435	278.299	106.363	97.0491	249.394	126.618	88.687	214.395	118.423	51.5141	225.421	1	1.9621	1.13293	2.26122	0.912432	2.34474	0.700427	1.69323	0.434999	1.90351
			total non-oxidized PE						16208	18126.3	15000.4	10797.5	16017.1	12859.6	7290.26	14144	15015.5	7783.53	12436.9	13265.1	5168.2	15180.9	1	1.11836	0.719812	1.06778	0.56691	1.09987	0.518367	0.828268	0.389607	1.14442
lipid0086	polar structural lipids	PI, non-oxidized	PI 34:2			-0.48932		-0.85277	3330.25	3241.99	3070.9	2980.6	3202.39	2763.61	2432.4	2854.95	3076.57	2411.73	2580.18	2831.03	1555.93	2810.36	1	0.973497	0.970595	1.04282	0.880152	1.03305	0.783903	0.838657	0.549598	0.9927
lipid1001	polar structural lipids	PI, non-oxidized	PI 34:3 (measured in negative mode)			-0.47336		-0.72098	3426.04	2580.82	2470.26	2436.7	2919.73	2115.61	1829.31	2202.33	2283.99	2082.52	1848.83	2178.95	1502.72	2481.2	1	0.753294	0.986417	1.18195	0.864671	1.04099	0.911788	0.809474	0.689653	1.13872
lipid0085	polar structural lipids	PI, non-oxidized	PI 34:3 (measured in positive mode)			-0.58584		-0.8453	4193.32	4086.63	3542.87	3451.79	4087.49	3126.55	2628.72	3307.04	3392.79	2980.9	3157.34	3217.66	2060.75	3906.3	1	0.974557	0.974292	1.15373	0.840773	1.05773	0.878598	0.930601	0.640448	1.21402
			total PI						10949.6	9909.44	9084.02	8869.09	10209.6	8005.77	6890.42	8364.33	8753.35	7475.15	7586.35	8227.64	5119.39	9197.87	1	0.905004	0.97634	1.12391	0.860682	1.04479	0.853975	0.86668	0.622218	1.11792
lipid0095	polar structural lipids	PS, non-oxidized	PS 34:3	0.55624	0.35401			-0.81931	137.381	95.9176	113.686	81.9506	68.989	101.772	49.2711	59.971	122.416	48.9044	53.8457	112.218	58.5366	120.936	1	0.698188	0.720851	0.606839	0.484131	0.589267	0.399494	0.439859	0.521632	1.07769
lipid0116	polar structural lipids	PS, non-oxidized	PS 42:2	0.5184		-0.32921		-0.89138	132.084	91.0196	119.253	75.1033	72.0167	90.684	47.6094	60.8951	108.934	43.7123	50.1903	94.9878	43.2284	74.4233	1	0.689106	0.62978	0.603897	0.525003	0.671508	0.401274	0.460742	0.455095	0.783504
lipid0115	polar structural lipids	PS, non-oxidized	PS 42:3			-0.46615		-0.89189	177.089	151.157	148.978	92.601	104.032	120.659	55.8793	88.6273	144.409	55.5435	75.626	129.184	56.4688	130.942	1	0.853563	0.621575	0.698308	0.463117	0.734525	0.384627	0.523695	0.43712	1.01361
			total PS						446.553	338.094	381.917	249.655	245.038	313.116	152.76	209.493	375.758	148.16	179.662	336.39	158.234	326.302	1	0.757119	0.653689	0.6416	0.48787	0.669061	0.394297	0.478132	0.470389	0.970012
lipid0209	polar structural lipids	GIPC, non-oxidized	GIPC 42:1;O3						27.34	26.414	22.3908	23.872	26.5492	15.7614	23.0707	26.5432	30.0007	21.3238	24.4253	18.8101	19.6087	20.5481	1	0.966128	1.06615	1.18572	1.46374	1.68406	0.710778	0.814158	1.04245	1.0924
lipid0210	polar structural lipids	GIPC, non-oxidized	GIPC 42:1;O4			-0.35084		-0.79254	86.3304	57.5497	88.1626	86.3348	71.0968	55.5179	50.2252	65.2978	68.9064	35.5765	46.7266	51.7134	24.7976	39.2665	1	0.666622	0.979268	0.806429	0.904666	1.17616	0.516301	0.678117	0.47952	0.75931
lipid0212	polar structural lipids	GIPC, non-oxidized	GIPC 42:2;O4					-0.71892	57.605	34.1764	57.3334	64.0925	53.1086	43.0175	53.2351	50.8419	66.7592	34.1528	39.2987	43.8332	24.3223	39.0836	1	0.593289	1.11789	0.926311	1.23752	1.18189	0.511582	0.588663	0.554885	0.891644
lipid0226	polar structural lipids	GlcCer, non-oxidized	Hex-Cer 34:1;O3				0.33585		5728.48	5676.61	5292.21	5815.21	5346.83	4461.6	4918.99	5237.16	5442.22	4943.03	4631.32	4910.56	4370.33	4658.65	1	0.990946	1.09882	1.01032	1.10252	1.17383	0.908275	0.850999	0.889986	0.9487
lipid0227	polar structural lipids	GlcCer, non-oxidized	Hex-Cer 34:1;O4			-0.35882			7107.51	6448.65	6413.72	6812.56	6597.38	5144.39	5801.89	6302.57	6536.98	6057.98	5447.85	5668.46	5446.3	5604.29	1	0.907302	1.06219	1.02864	1.12781	1.22514	0.926724	0.83339	0.960808	0.98868
lipid0233	polar structural lipids	GlcCer, non-oxidized	Hex-Cer 40:1;O4			-0.3323			5586.49	4135.37	4742.74	5073.35	4808	3657.48	3835.61	4367.03	4739.32	4122.61	3679.6	3873.59	4001.09	3401.56	1	0.740245	1.06971	1.01376	1.0487	1.194	0.869874	0.7764	1.03292	0.878142
lipid0237	polar structural lipids	GlcCer, non-oxidized	Hex-Cer 42:2;O4			-0.39974		-0.72587	21233	19102.5	18479.3	20261.6	20906.4	16085.3	17667.9	19329.3	19725.6	18001.8	16553.6	17730.7	15022.7	18869.9	1	0.899662	1.09645	1.13134	1.09839	1.20168	0.912612	0.839197	0.847272	1.06425
			total sphingolipids						39826.8	35481.3	35095.9	38137	37809.3	29463	32350.9	35378.8	36609.7	33216.4	30422.9	32297.6	28909.2	32633.3	1	0.890891	1.08665	1.07732	1.09802	1.20079	0.907312	0.831005	0.895086	1.01039
			total polar structural lipids						1.17724e+06	1.12063e+06	1.16983e+06	1.06209e+06	1.03524e+06	1.05674e+06	489235	805344	1.26657e+06	478860	686516	1.15886e+06	334047	918388	1	0.951912	0.907897	0.884951	0.462968	0.762104	0.378077	0.542028	0.288254	0.79249
lipid0305		TeGDG, non-oxidized	TeGDG 34:6		-0.70481	-0.5825			15.7832	66.6629	23.9413	380.199	972.909	32.4415	463.471	915.624	9.39806	770.818	734.967	9.04669	657.487	242.947	1	4.22367	15.8805	40.6373	14.2864	28.2239	82.0188	78.2041	72.6772	26.8549
lipid0309		TeGDG, non-oxidized	TeGDG 36:6		-0.68128	-0.50193			26.0013	32.119	25.8778	95.2407	178.918	19.0832	131.772	187.654	22.8432	201.38	167.208	20.3977	218.041	96.2341	1	1.23528	3.6804	6.91395	6.90516	9.83349	8.81576	7.31983	10.6895	4.7179
lipid0294		TrGDG, non-oxidized	TrGDG 34:6	-0.45071	-0.66692	-0.55135			35.0567	162.778	73.32	3528.43	6504.3	60.3185	3094.37	5522.79	18.0396	3932.43	4313.44	31.0057	1943.51	1584.68	1	4.64327	48.1237	88.7112	51.3006	91.5605	217.989	239.109	62.6825	51.1093
lipid0298		TrGDG, non-oxidized	TrGDG 36:6	-0.74183	-0.69717	-0.53385			49.9146	208.084	199.16	813.213	1557.67	44.1595	1142.21	1693.36	56.1205	1278.24	1406.58	79.9896	853.044	640.672	1	4.1688	4.08322	7.8212	25.8655	38.3463	22.7767	25.0635	10.6644	8.00944
			total polygalactosylated diacylglycerols						126.756	469.644	322.299	4817.08	9213.8	156.003	4831.83	8319.42	106.401	6182.87	6622.19	140.44	3672.08	2564.53	1	3.70511	14.946	28.5877	30.9727	53.3287	58.1089	62.2378	26.1471	18.2607
lipid0126	PA	PA, non-oxidized	PA 34:1		0.46707			0.8417	13.989	23.8856	15.3841	128.718	67.1567	9.29792	153.038	77.6064	15.1018	146.574	77.0896	9.94121	180.318	27.3287	1	1.70746	8.36692	4.36533	16.4594	8.34665	9.70572	5.10465	18.1385	2.74903
lipid0125	PA	PA, non-oxidized	PA 34:2		0.48388			0.8556	94.0892	286.788	76.6439	1500.65	665.604	63.171	1450.34	563.886	88.9973	1174.69	586.345	66.0121	1185.15	157.57	1	3.04805	19.5795	8.68437	22.959	8.92634	13.1991	6.58834	17.9536	2.38698
lipid0124	PA	PA, non-oxidized	PA 34:3		0.43132			0.84041	83.2319	75.2299	64.2869	1458.19	598.475	54.9489	1225.68	476.933	72.7555	1199.88	485.213	56.7377	925.891	132.591	1	0.903859	22.6826	9.30944	22.3058	8.67957	16.492	6.66909	16.3188	2.33691
lipid0123	PA	PA, non-oxidized	PA 34:4	-0.45225	0.37479			0.83835	8.95528	16.9474	10.8134	242.773	72.683	5.44915	505.809	132.033	9.2578	416.372	133.356	5.6163	268.708	30.4016	1	1.89245	22.4512	6.72159	92.8234	24.23	44.9753	14.4047	47.8443	5.4131
lipid0131	PA	PA, non-oxidized	PA 36:2		0.54469	0.33256		0.83938	8.06535	10.5445	7.90449	115.572	45.0338	5.49062	95.8822	38.5368	9.9612	104.848	149.553	7.67703	92.9713	11.5976	1	1.30738	14.6211	5.69724	17.4629	7.01867	10.5257	15.0136	12.1103	1.51068
lipid0130	PA	PA, non-oxidized	PA 36:3		0.50435			0.84067	21.5023	26.1623	18.9608	359.963	180.354	15.0085	264.665	138.148	23.2413	207.192	146.254	15.827	220.968	37.7033	1	1.21672	18.9846	9.51191	17.6343	9.20466	8.91482	6.29284	13.9614	2.38221
lipid0129	PA	PA, non-oxidized	PA 36:4		0.42002			0.86203	56.6604	64.4154	47.0444	1245.18	668.316	38.6352	947.275	473.587	60.059	694.511	513.646	46.2519	613.237	108.524	1	1.13687	26.4682	14.2061	24.5184	12.2579	11.5638	8.55235	13.2586	2.34637
lipid0128	PA	PA, non-oxidized	PA 36:5		0.41757			0.85766	61.5493	75.7587	49.7265	1683.67	834.193	41.7888	1185.04	559.08	58.1278	878.493	563.029	47.3598	655.744	118.872	1	1.23086	33.8586	16.7756	28.3577	13.3787	15.1131	9.68605	13.846	2.50998
lipid0127	PA	PA, non-oxidized	PA 36:6	-0.34672	0.38335			0.84273	24.7063	37.9274	20.4572	1003.49	358.393	16.5255	485.899	221.776	20.9553	418.925	228.833	19.6948	260.97	48.734	1	1.53513	49.0533	17.5192	29.4031	13.4203	19.9913	10.92	13.2507	2.47446
lipid0800	PA	LPA, non-oxidized	LPA 18:3	0.51583		0.54028	0.52801	0.77297	375.024	137.825	160.568	295.025	299.173	145.619	278.787	154.797	170.208	272.999	151.613	160.862	464.527	88.3553	1	0.367509	1.83738	1.86321	1.9145	1.06303	1.60391	0.890751	2.88774	0.549262
			total extraplastidic PA						747.773	755.484	471.79	8033.24	3789.38	395.934	6592.41	2836.38	528.666	5514.49	3034.93	435.98	4868.49	761.677	1	1.01031	17.0272	8.03193	16.6503	7.16377	10.431	5.74074	11.1668	1.74705
lipid0122	PA	PA, non-oxidized	PA 34:5*	-0.60592				0.78919	2.35951	6.2696	2.19648	19.6068	18.9797	1.27353	13.8663	15.3649	1.86517	19.3888	17.0886	1.72714	18.2529	7.11097	1	2.65717	8.92647	8.64096	10.888	12.0648	10.3952	9.16195	10.5682	4.11719
lipid0121	PA	PA, non-oxidized	PA 34:6	-0.63218	-0.36837			0.63604	2.19965	8.09778	2.95062	121.122	133.741	1.60093	56.1464	45.5958	1.66476	51.4707	48.6073	1.81254	39.0711	11.8559	1	3.68139	41.0495	45.3262	35.0711	28.4809	30.9178	29.1978	21.556	6.54101
			total plastidic PA						4.55916	14.3674	5.14711	140.729	152.72	2.87446	70.0126	60.9607	3.52993	70.8595	65.6959	3.53969	57.324	18.9668	1	3.15132	27.3413	29.6711	24.3568	21.2077	20.0739	18.6111	16.1946	5.35834
			total PA						752.332	769.852	476.937	8173.96	3942.1	398.809	6662.43	2897.34	532.195	5585.34	3100.63	439.519	4925.81	780.644	1	1.02329	17.1385	8.26546	16.7058	7.26499	10.4949	5.82611	11.2073	1.77613
lipid0473	acylated plastidic lipids	acMGDG, non-oxidized	MGDG-O(FA 16:0) 34:6					0.81699	62.4134	58.8972	53.4745	940.368	294.915	39.2816	6660.7	2547.75	59.4899	5536.87	2616.26	57.4244	5444.38	752.294	1	0.943663	17.5854	5.51505	169.563	64.8588	93.0724	43.9782	94.8095	13.1006
lipid0464	acylated plastidic lipids	acMGDG, non-oxidized	MGDG-O(FA 16:1) 34:6					0.79846	100.202	60.0217	68.399	162.878	100.331	56.1188	428.022	263.711	111.727	406.311	299.85	82.0929	444.366	139.023	1	0.599007	2.38129	1.46684	7.62707	4.69916	3.63664	2.68377	5.41297	1.69348
lipid0459	acylated plastidic lipids	acMGDG, non-oxidized	MGDG-O(FA 16:2) 34:6					0.78945	102.613	95.1929	63.635	202.908	217.247	51.999	437.602	304.95	95.2113	414.088	290.158	81.457	425.786	141.195	1	0.927689	3.18862	3.41396	8.41557	5.86454	4.34915	3.04751	5.22713	1.73337
lipid0448	acylated plastidic lipids	acMGDG, non-oxidized	MGDG-O(FA 16:3) 34:6		0.42338			0.77117	71.7284	117.684	77.1089	5937.14	853.267	37.4372	23437.5	7691.39	46.0317	17501.3	7246.53	43.6737	12951.5	1383.13	1	1.64069	76.9969	11.0657	626.048	205.448	380.202	157.425	296.551	31.6697
lipid0526	acylated plastidic lipids	acMGDG, non-oxidized	MGDG-O(FA 18:0) 34:6			0.34569		0.8175	49.7853	44.4585	37.7432	114.507	72.3462	28.7926	536.934	236.63	50.0942	477.465	288.238	35.8696	563.126	132.238	1	0.893004	3.03383	1.9168	18.6483	8.21841	9.53136	5.75393	15.6992	3.68663
lipid0514	acylated plastidic lipids	acMGDG, non-oxidized	MGDG-O(FA 18:2) 34:6		0.38121			0.81338	48.3313	48.2752	40.6934	853.05	222.572	30.6224	4312.58	1506.75	39.9276	3560.59	1498.26	37.2243	3203.78	397.333	1	0.99884	20.9629	5.46949	140.831	49.2042	89.1761	37.5244	86.0669	10.674
lipid0501	acylated plastidic lipids	acMGDG, non-oxidized	MGDG-O(FA 18:3) 34:6		0.46677			0.80335	96.2131	160.084	100.64	11555.1	1736.56	57.3899	47737	19315.1	64.5641	41187.6	18812.8	61.1617	34305.7	3860.53	1	1.66385	114.816	17.2551	831.801	336.56	637.933	291.382	560.902	63.1201
			total non-oxidized acylated plastidic lipids						531.286	584.614	441.694	19766	3497.23	301.642	83550.4	31866.3	467.046	69084.2	31052.1	398.904	57338.6	6805.75	1	1.10037	44.7503	7.91777	276.986	105.643	147.917	66.4862	143.741	17.0611
lipid0599	acylated plastidic lipids	acDGDG, oxidized	DGDG-O(FA 18:4;O) 34:6			-0.37297		0.57272	19.4694	20.1602	17.3056	18.094	21.8462	12.6513	23.3768	27.6082	18.309	28.0742	26.4031	17.0836	28.6102	23.0047	1	1.03548	1.04556	1.26238	1.84777	2.18223	1.53336	1.44209	1.67472	1.3466
lipid0600	acylated plastidic lipids	acDGDG, oxidized	DGDG-O(FA 18:4;O) 34:7;O		-0.36348	-0.40129		0.56757	21.5082	19.1389	17.3391	17.5863	24.0938	12.8512	27.2135	34.3159	18.0436	31.3375	38.7873	14.9329	31.9267	27.0762	1	0.88984	1.01426	1.38957	2.11758	2.67024	1.73677	2.14964	2.13801	1.81318
lipid0601	acylated plastidic lipids	acDGDG, oxidized	DGDG-O(FA 18:4;O) 36:6 or DGDG-O(FA 18:4;O) 34:8;O2	-0.37143		-0.45997		0.4592	35.0535	39.0898	50.6328	50.9753	42.7065	23.4101	92.5401	116.459	58.0956	109.539	114.25	37.1986	98.6357	86.2757	1	1.11515	1.00677	0.843455	3.953	4.97472	1.8855	1.96659	2.65159	2.31932
lipid0603	acylated plastidic lipids	acDGDG, oxidized	DGDG-O(FA 18:4;O) 36:8;O2			-0.50476			11.4304	14.4564	11.8471	12.9992	21.3208	7.83599	40.0113	62.0473	10.7769	51.1592	65.5277	9.06585	40.0599	54.2446	1	1.26474	1.09724	1.79966	5.1061	7.91825	4.74714	6.0804	4.41876	5.9834
lipid0474	acylated plastidic lipids	acMGDG, oxidized	MGDG-O(FA 16:0) 34:7;O					0.8	67.6896	70.0516	63.3067	101.648	96.9875	44.7369	859.261	575.595	68.2907	635.672	601.115	68.416	767.388	253.735	1	1.03489	1.60565	1.53203	19.207	12.8662	9.30833	8.80231	11.2165	3.70871
lipid0483	acylated plastidic lipids	acMGDG, oxidized	MGDG-O(FA 16:0) 36:8;O2					0.62754	35.71	39.2422	34.177	67.2803	64.0276	22.2262	441.199	299.518	37.4176	302.279	341.821	33.8895	352.883	238.515	1	1.09891	1.96859	1.87341	19.8504	13.4759	8.07852	9.13528	10.4128	7.03804
lipid0496	acylated plastidic lipids	acMGDG, oxidized	MGDG-O(FA 16:3;O) 34:6		-0.5233	-0.50528		0.75727	49.8281	54.6635	32.2961	38.8272	74.8405	27.5654	61.4968	93.6097	43.7594	67.9173	88.8821	29.3454	171.628	64.7136	1	1.09704	1.20223	2.31733	2.23094	3.39591	1.55206	2.03116	5.84853	2.20524
lipid0498	acylated plastidic lipids	acMGDG, oxidized	MGDG-O(FA 16:3;O) 34:8;O2 or MGDG-O(FA 16:3;O) 36:6		-0.73415	-0.59099	-0.37843	0.76268	71.1494	105.353	52.3131	75.8938	173.323	38.6077	131.552	219.983	57.4955	113.225	186.444	50.2355	237.993	114.884	1	1.48072	1.45076	3.3132	3.40739	5.69792	1.96928	3.24275	4.73755	2.28691
lipid0500	acylated plastidic lipids	acMGDG, oxidized	MGDG-O(FA 16:3;O) 36:8;O2		-0.51505	-0.47465		0.61287	43.3747	39.6263	24.1596	30.6442	58.9564	21.8055	38.6225	69.2618	40.0837	40.0682	59.0397	23.7635	55.0026	41.917	1	0.913582	1.26841	2.44029	1.77123	3.17635	0.999612	1.47291	2.31458	1.76392
lipid0487	acylated plastidic lipids	acMGDG, oxidized	MGDG-O(FA 16:4;O) 34:7;O		-0.50378	-0.40129		0.66075	51.2165	55.5078	48.9635	49.8192	77.854	32.2251	102.751	118.708	56.8943	93.135	115.282	38.9306	110.536	79.9371	1	1.08379	1.01748	1.59004	3.18852	3.68372	1.63698	2.02624	2.83931	2.05332
lipid0489	acylated plastidic lipids	acMGDG, oxidized	MGDG-O(FA 16:4;O) 34:8;O2 or MGDG-O(FA 16:4;O) 36:6		-0.49121		-0.45406	0.34723	128.768	183.883	94.7428	134.267	188.24	68.4395	615.078	679.532	136.514	372.138	531.523	122.681	450.535	384.088	1	1.42802	1.41717	1.98685	8.98717	9.92895	2.72599	3.89353	3.67242	3.13079
lipid0495	acylated plastidic lipids	acMGDG, oxidized	MGDG-O(FA 16:4;O) 36:8;O2		-0.48296		-0.35322	0.339	32.1731	35.1014	27.7498	31.8062	54.6068	20.9306	89.137	97.4349	26.5421	65.5278	107.141	20.5593	74.6321	78.3393	1	1.09102	1.14618	1.96782	4.2587	4.65514	2.46883	4.03666	3.6301	3.81042
lipid0527	acylated plastidic lipids	acMGDG, oxidized	MGDG-O(FA 18:0) 34:7;O		-0.40901			0.75418	46.8226	43.255	38.5333	44.9253	57.8822	29.2575	105.308	98.1086	48.0049	104.23	101.194	34.2625	142.567	67.4519	1	0.923805	1.16588	1.50214	3.59934	3.35328	2.17123	2.10799	4.16103	1.96868
lipid0515	acylated plastidic lipids	acMGDG, oxidized	MGDG-O(FA 18:2) 34:7;O					0.81956	47.0637	52.0617	43.3175	84.3016	84.4527	32.328	563.352	395.997	45.7796	442.421	398.996	38.8556	489.588	151.06	1	1.1062	1.94613	1.94962	17.4262	12.2494	9.66415	8.7156	12.6002	3.88773
lipid0518	acylated plastidic lipids	acMGDG, oxidized	MGDG-O(FA 18:2) 36:8;O2					0.78739	52.2582	45.5792	43.9832	71.4041	69.8884	39.8398	242.164	195.887	42.7853	174.694	197.768	49.506	203.464	98.0368	1	0.872192	1.62344	1.58898	6.07846	4.91688	4.08303	4.62234	4.10989	1.9803
lipid0551	acylated plastidic lipids	acMGDG, oxidized	MGDG-O(FA 18:2;O) 36:6 or MGDG-O(FA 18:2;O) 34:8;O2	-0.44402				0.80669	155.937	254.357	157.36	418.824	392.21	99.621	1876.35	1643.46	178.314	1628.58	1084.94	134.217	1785	412.076	1	1.63116	2.66157	2.49244	18.8349	16.4971	9.13319	6.08442	13.2994	3.07021
lipid0553	acylated plastidic lipids	acMGDG, oxidized	MGDG-O(FA 18:2;O) 36:8;O2	-0.47362				0.80386	48.0239	57.8323	44.312	154.278	103.429	35.9359	531.431	314.04	56.8235	410.971	239.904	40.8258	408.042	96.5608	1	1.20424	3.48162	2.3341	14.7883	8.7389	7.23242	4.22191	9.99472	2.36519
lipid0583	acylated plastidic lipids	acMGDG, oxidized	MGDG-O(FA 18:2;O2) 36:6 or MGDG-O(FA 18:2;O2) 34:8;O2	0.37091	-0.3861	-0.3462			2332.5	859.113	673.286	912.245	1052.76	523.077	1127.82	1238.48	1185.5	941.487	804.805	656.596	1356.94	817.254	1	0.368323	1.35492	1.56362	2.15614	2.36768	0.794171	0.678876	2.06663	1.24468
lipid0596	acylated plastidic lipids	acMGDG, oxidized	MGDG-O(FA 18:2;O3) 36:6 or MGDG-O(FA 18:2;O3) 34:8;O2		-0.40963	-0.37297		0.72587	132.67	170.061	91.0384	133.205	201.5	72.0198	296.638	410.491	98.8261	307.242	257.318	91.6272	378.046	178.956	1	1.28184	1.46317	2.21335	4.11883	5.6997	3.10891	2.60374	4.12592	1.95308
lipid0503	acylated plastidic lipids	acMGDG, oxidized	MGDG-O(FA 18:3) 34:7;O	-0.55779				0.81519	35.4524	55.392	40.7226	540.365	228.772	27.0779	5181.46	3951.71	34.4397	4164.3	3991.92	37.8243	4357.09	973.402	1	1.56243	13.2694	5.61782	191.354	145.938	120.916	115.91	115.193	25.7348
lipid0508	acylated plastidic lipids	acMGDG, oxidized	MGDG-O(FA 18:3) 36:7;O	-0.42754				0.81467	34.7734	46.6229	40.2656	184.357	92.5332	25.9055	1354.56	606.47	44.6107	805.122	702.153	41.3268	1119.79	252.675	1	1.34077	4.57851	2.29807	52.2885	23.4108	18.0477	15.7396	27.0958	6.11408
lipid0512	acylated plastidic lipids	acMGDG, oxidized	MGDG-O(FA 18:3) 36:8;O2					0.76319	46.1369	53.4428	49.6664	390.181	183.213	34.1531	2422.65	1511.64	45.2547	1246.1	1504.96	48.3057	1387.73	449.281	1	1.15835	7.85604	3.68887	70.9351	44.2606	27.5352	33.2553	28.7281	9.3008
lipid0542	acylated plastidic lipids	acMGDG, oxidized	MGDG-O(FA 18:3;O) 34:6		-0.3861			0.83707	95.9993	79.6066	56.3643	71.4802	95.7343	81.4041	105.131	94.4886	56.8706	103.362	104.113	74.7372	491.29	83.6247	1	0.829241	1.26818	1.69849	1.29147	1.16074	1.81749	1.8307	6.57356	1.11892
lipid0543	acylated plastidic lipids	acMGDG, oxidized	MGDG-O(FA 18:3;O) 34:7;O					0.8175	49.4597	43.5812	34.8686	43.8067	51.4154	32.0509	91.3583	86.0236	42.3425	80.2564	96.5231	33.7893	212.595	64.7505	1	0.881144	1.25634	1.47455	2.85041	2.68397	1.89541	2.27958	6.29178	1.9163
lipid0544	acylated plastidic lipids	acMGDG, oxidized	MGDG-O(FA 18:3;O) 36:6 or MGDG-O(FA 18:3;O) 34:8;O2					0.75573	107.307	154.137	103.197	168.721	217.051	73.646	609.384	570.113	84.3268	492.826	637.737	86.178	1212.11	452.29	1	1.43641	1.63493	2.10326	8.27451	7.74127	5.84424	7.56268	14.0652	5.24833
lipid0546	acylated plastidic lipids	acMGDG, oxidized	MGDG-O(FA 18:3;O) 36:6;O					0.73076	101.216	83.8945	63.305	110.57	110.084	60.0654	306.376	121.285	76.3219	209.848	158.247	67.4559	435.441	83.8018	1	0.828865	1.74662	1.73895	5.1007	2.01922	2.74952	2.07341	6.45519	1.24232
lipid0545	acylated plastidic lipids	acMGDG, oxidized	MGDG-O(FA 18:3;O) 36:7;O		-0.37143			0.77555	78.9807	69.4648	65.3524	68.9578	96.229	54.965	83.3877	86.3106	69.5489	74.1944	89.8456	60.5393	183.171	80.7012	1	0.879516	1.05517	1.47246	1.51711	1.57028	1.06679	1.29183	3.02566	1.33304
lipid0548	acylated plastidic lipids	acMGDG, oxidized	MGDG-O(FA 18:3;O) 36:8;O2					0.72175	25.859	22.2874	18.3302	27.5022	40.1109	16.226	78.409	70.3564	21.7192	59.2961	85.8504	18.1502	129.762	65.4517	1	0.861882	1.50038	2.18824	4.83231	4.33603	2.73012	3.95273	7.14934	3.6061
lipid0566	acylated plastidic lipids	acMGDG, oxidized	MGDG-O(FA 18:3;O2) 34:6	-0.37029	-0.58869			0.7686	56.6569	93.8266	56.8972	55.7768	116.177	32.7704	187.239	231.846	49.7218	180.575	222.674	34.788	307.517	174.459	1	1.65605	0.980309	2.04187	5.71367	7.07486	3.6317	4.4784	8.83975	5.01492
lipid0570	acylated plastidic lipids	acMGDG, oxidized	MGDG-O(FA 18:3;O2) 36:6 or MGDG-O(FA 18:3;O2) 34:8;O2	-0.35058	-0.6495	-0.43758	-0.43081		555.217	894.267	580.765	413.364	965.253	300.721	1460.02	2117.96	438.348	1164.61	1485.5	311.411	1051.73	1143.74	1	1.61066	0.711759	1.66204	4.85508	7.04296	2.65682	3.38887	3.37733	3.67278
lipid0580	acylated plastidic lipids	acMGDG, oxidized	MGDG-O(FA 18:3;O2) 36:8;O2	-0.36654	-0.41788			0.64453	25.1622	37.7146	23.0778	47.7945	58.3055	18.1713	163.177	193.026	25.0419	152.809	177.929	17.1093	141.518	94.0666	1	1.49886	2.07101	2.52647	8.97994	10.6226	6.10215	7.10527	8.27143	5.49799
lipid0591	acylated plastidic lipids	acMGDG, oxidized	MGDG-O(FA 18:3;O3) 34:6		-0.37662			0.79073	34.889	42.0522	25.6479	44.9586	59.165	20.2153	115.787	70.3632	26.5025	80.0113	76.3817	22.4061	154.107	48.4769	1	1.20531	1.75291	2.30682	5.7277	3.48069	3.01901	2.88206	6.87789	2.16356
lipid0592	acylated plastidic lipids	acMGDG, oxidized	MGDG-O(FA 18:3;O3) 34:7;O		-0.42827			0.76602	40.5948	33.8386	27.5885	35.6422	45.6859	22.2687	69.4994	69.1762	33.9087	74.5993	68.7478	24.7943	103.914	46.2961	1	0.833569	1.29192	1.65598	3.12095	3.10644	2.2	2.02744	4.19105	1.8672
lipid0593	acylated plastidic lipids	acMGDG, oxidized	MGDG-O(FA 18:3;O3) 36:6 or MGDG-O(FA 18:3;O3) 34:8;O2					0.61184	651.257	334.85	257.49	351.305	364.151	176.282	511.981	630.807	370.861	446.938	454.538	235.03	734.128	391.233	1	0.51416	1.36434	1.41424	2.90432	3.57839	1.20514	1.22563	3.12355	1.66461
lipid0595	acylated plastidic lipids	acMGDG, oxidized	MGDG-O(FA 18:3;O3) 36:8;O2		-0.42399			0.57503	31.7877	23.7529	17.5887	22.6239	36.2094	15.6882	47.223	54.4582	24.1973	42.5579	53.526	17.4615	56.4808	47.5189	1	0.747237	1.28627	2.05867	3.0101	3.47129	1.75879	2.21207	3.23458	2.72135
lipid0532	acylated plastidic lipids	acMGDG, oxidized	MGDG-O(FA 18:4;O) 34:6		-0.39832			0.71171	32.1368	34.9416	24.3977	32.8948	47.6212	19.803	93.1671	86.2795	27.6897	71.459	89.6142	21.8582	91.8138	65.9028	1	1.08728	1.34828	1.95187	4.7047	4.35689	2.5807	3.23637	4.20043	3.01502
lipid0533	acylated plastidic lipids	acMGDG, oxidized	MGDG-O(FA 18:4;O) 34:7;O					0.71094	34.3593	40.1147	34.3779	65.0979	70.9556	25.0626	517.541	519.845	33.861	321.495	493.484	29.1289	385.917	189.616	1	1.16751	1.8936	2.06399	20.6499	20.7419	9.49455	14.5738	13.2486	6.50955
lipid0535	acylated plastidic lipids	acMGDG, oxidized	MGDG-O(FA 18:4;O) 34:8;O2 (Arabidopside E or MGDG-O(FA 18:4;O) 36:6)	-0.35856		-0.3843	-0.51232		263.39	761.784	320.544	643.869	1370.48	100.665	6267.26	9742.02	74.4661	4289.8	8307.76	91.4121	3967.52	5295.32	1	2.89223	2.00867	4.27549	62.2587	96.7769	57.6074	111.564	43.4025	57.928
lipid0538	acylated plastidic lipids	acMGDG, oxidized	MGDG-O(FA 18:4;O) 36:6;O or MGDG-O(FA 18:4;O) 34:8;O3		-0.611	-0.62342	-0.65266		157.827	177.654	98.6611	83.578	228.563	64.4716	106.633	265.414	84.2379	108.539	224.291	59.9716	142.583	201.464	1	1.12563	0.847123	2.31665	1.65395	4.11676	1.28848	2.66259	2.37751	3.35932
lipid0537	acylated plastidic lipids	acMGDG, oxidized	MGDG-O(FA 18:4;O) 36:7;O				-0.36527		54.1559	78.5448	43.0442	47.3208	98.9605	27.1842	155.136	156.266	38.641	124.52	176.472	30.5845	250.615	251.901	1	1.45035	1.09935	2.29904	5.70684	5.7484	3.22249	4.56696	8.19417	8.23622
lipid0575	acylated plastidic lipids	acMGDG, oxidized	MGDG-O(FA 18:4;O) 36:7;O2 (alternative fragmentation)		-0.60703	-0.64402	-0.47871		98.8892	122.703	65.2208	37.8193	132.665	43.787	56.9106	107.277	58.7739	61.3181	88.4747	37.5398	95.9085	118.064	1	1.24081	0.579866	2.03409	1.29971	2.44998	1.04329	1.50534	2.55485	3.14505
lipid0574	acylated plastidic lipids	acMGDG, oxidized	MGDG-O(FA 18:4;O) 36:8;O2 (alternative fragmentation; Arabidopside G)	-0.4103					38.9816	94.1294	44.1397	109.715	158.291	20.8828	1005.15	992.403	20.1698	636.989	1057.99	22.3889	627.361	735.882	1	2.41471	2.48563	3.58615	48.133	47.5224	31.5813	52.4544	28.021	32.8682
lipid0540	acylated plastidic lipids	acMGDG, oxidized	MGDG-O(FA 18:4;O) 36:8;O2 (Arabidopside G)						31.9938	66.4968	33.4796	98.6832	128.604	16.8675	889.023	856.851	17.3222	578.336	915.872	16.6673	511.237	651.679	1	2.07843	2.94756	3.84126	52.7062	50.7989	33.387	52.8727	30.673	39.0992
lipid0541	acylated plastidic lipids	acMGDG, oxidized	MGDG-O(FA 18:4;O) 38:4 or MGDG-O(FA 18:4;O) 36:6;O2		-0.51016	-0.43423	-0.43501		44.4262	47.0113	32.191	31.7212	62.3169	21.007	58.3378	88.6983	33.7299	61.0181	85.2572	29.0167	63.5764	74.3361	1	1.05819	0.985405	1.93585	2.77706	4.22232	1.80902	2.52764	2.19103	2.56184
lipid0559	acylated plastidic lipids	acMGDG, oxidized	MGDG-O(FA 18:4;O2) 34:6					0.826	48.5319	32.0613	26.1328	75.4654	65.6558	21.6137	241.584	151.537	25.9829	224.381	122.153	24.6327	203.971	63.485	1	0.660623	2.88777	2.51239	11.1774	7.01118	8.63571	4.70129	8.2805	2.57727
lipid0560	acylated plastidic lipids	acMGDG, oxidized	MGDG-O(FA 18:4;O2) 34:7;O		-0.40688			0.73539	44.3307	37.2699	30.4006	33.716	50.1384	26.6957	64.7056	78.685	34.4662	59.1387	74.5207	27.311	80.476	51.1905	1	0.840725	1.10906	1.64926	2.42382	2.94747	1.71584	2.16214	2.94665	1.87435
lipid0561	acylated plastidic lipids	acMGDG, oxidized	MGDG-O(FA 18:4;O2) 36:6 or MGDG-O(FA 18:4;O2) 34:8;O2					0.58945	59.7682	86.8165	48.9359	83.4209	118.391	27.4804	381.473	423.26	35.1189	293.101	392.691	35.3475	394.669	268.037	1	1.45255	1.7047	2.41932	13.8816	15.4023	8.34595	11.1817	11.1654	7.58291
lipid0565	acylated plastidic lipids	acMGDG, oxidized	MGDG-O(FA 18:4;O2) 36:8;O2			-0.37426		0.53256	24.9366	25.2711	19.1412	23.9544	36.729	14.1049	52.8329	61.3678	21.6316	43.1754	63.8487	15.8703	52.8251	50.0684	1	1.01341	1.25146	1.91884	3.74571	4.35081	1.99594	2.95164	3.32854	3.15485
lipid0586	acylated plastidic lipids	acMGDG, oxidized	MGDG-O(FA 18:4;O3) 34:6		-0.50435	-0.3408		0.70373	43.2059	48.9735	23.7543	27.0617	58.8226	17.1701	49.2975	73.3522	24.7147	52.3771	67.0727	18.3221	74.4679	47.8489	1	1.13349	1.13923	2.47629	2.87112	4.27208	2.11927	2.71388	4.06438	2.61154
lipid0587	acylated plastidic lipids	acMGDG, oxidized	MGDG-O(FA 18:4;O3) 34:7;O		-0.50527			0.73153	46.9323	43.6971	31.3361	38.3631	60.9771	23.4288	87.7175	100.401	33.9054	99.285	86.2323	26.7762	86.2423	52.8362	1	0.931067	1.22425	1.94591	3.744	4.28537	2.92829	2.54332	3.22086	1.97325
lipid0588	acylated plastidic lipids	acMGDG, oxidized	MGDG-O(FA 18:4;O3) 36:6 or MGDG-O(FA 18:4;O3) 34:8;O2					0.63166	58.7489	72.3079	57.2548	92.3212	107.46	33.555	366.834	432.607	49.2689	322.825	346.938	47.2898	292.384	225.212	1	1.2308	1.61246	1.87688	10.9323	12.8925	6.55231	7.04172	6.18282	4.76238
lipid0556	acylated plastidic lipids	acMGDG, oxidized	MGDG-O(FA 18:5;O2) 36:6 or MGDG-O(FA 18:5;O2) 34:8;O2			-0.37735		0.37864	77.1387	108.921	60.5777	84.5362	118.911	39.5835	234.322	341.051	50.4378	227.992	265.818	53.792	276.646	241.322	1	1.41202	1.3955	1.96296	5.91969	8.61599	4.52026	5.27021	5.14288	4.4862
lipid0558	acylated plastidic lipids	acMGDG, oxidized	MGDG-O(FA 18:5;O2) 36:8;O2		-0.39312	-0.33539		0.39176	29.7014	23.1273	19.0657	25.4156	35.5659	15.5137	42.1289	57.0317	22.929	40.7475	59.333	18.1466	47.9897	50.5898	1	0.77866	1.33305	1.86544	2.71559	3.67622	1.77711	2.58768	2.64456	2.78784
lipid0293	acylated plastidic lipids	acPG, oxidized	PG-O(FA 16:1) 36:8;O2**		-0.53613			0.64324	3.25688	3.47361	2.60212	2.84773	4.72873	2.04953	10.2663	10.8706	2.77585	10.2782	12.3139	2.14287	14.1866	11.4974	1	1.06655	1.09439	1.81726	5.00909	5.30394	3.70273	4.43608	6.62035	5.36542
			total oxidized acylated plastidic lipids						6546.1	6132.56	4043.05	6664.23	8576.86	2717.9	30733.3	31701.8	4362.39	22923.9	28201.9	3251.5	26922.2	16366.2	1	0.936826	1.64832	2.12138	11.3077	11.6641	5.25489	6.46479	8.27995	5.03342
lipid0476	acylated plastidic lipids	acMGDG, ambiguous	MGDG-O(FA 16:0) 36:6 or MGDG-O(FA 16:0) 34:8;O2					0.79279	100.111	149.344	105.59	641.833	350.572	63.2167	5850.98	3507.24	71.4977	4416.97	3500.34	96.6787	4870.59	1833.79	1	1.49178	6.07852	3.32012	92.5543	55.4797	61.7778	48.9574	50.3791	18.9679
lipid0468	acylated plastidic lipids	acMGDG, ambiguous	MGDG-O(FA 16:1) 36:6 or MGDG-O(FA 16:1) 34:8;O2					0.80051	91.8442	88.5194	81.4725	139.57	115.241	57.1087	327.146	333.966	99.8528	319.755	327.988	83.3386	404.814	200.071	1	0.963799	1.71309	1.41448	5.72848	5.8479	3.20226	3.28471	4.85746	2.4007
lipid0461	acylated plastidic lipids	acMGDG, ambiguous	MGDG-O(FA 16:2) 36:6 or MGDG-O(FA 16:2) 34:8;O2	-0.57915	-0.6492	-0.60051		0.61467	391.769	950.469	294.052	811.195	1879.32	242.385	1215.25	1824.81	352.837	971.224	1321.04	332.654	918.735	744.537	1	2.4261	2.75868	6.39109	5.01372	7.52858	2.75262	3.74404	2.76183	2.23817
lipid0454	acylated plastidic lipids	acMGDG, ambiguous	MGDG-O(FA 16:3) 36:6 or MGDG-O(FA 16:3) 34:8;O2					0.82239	99.3339	140.49	126.426	1780.61	465.37	64.2891	8676.16	4592.12	115.771	5349.93	3754.17	101.277	4738	941.968	1	1.41432	14.0842	3.68096	134.955	71.4292	46.2114	32.4276	46.7824	9.30087
lipid0519	acylated plastidic lipids	acMGDG, ambiguous	MGDG-O(FA 16:3;O2) 34:6 or MGDG-O(FA 18:1) 34:6					0.81055	62.6924	70.4782	51.6858	193.14	134.498	37.8491	781.736	492.054	59.7777	734.171	488.744	51.9279	860.028	183.467	1	1.12419	3.7368	2.60223	20.654	13.0004	12.2817	8.17603	16.562	3.53311
lipid0522	acylated plastidic lipids	acMGDG, ambiguous	MGDG-O(FA 16:3;O2) 36:6 or MGDG-O(FA 16:3;O2) 34:8;O2 or MGDG-O(FA 18:1) 36:6 or MGDG-O(FA 18:1) 34:8;O2	-0.54801	-0.57066	-0.36088		0.69395	231.341	455.623	258.434	300.875	538.905	167.73	987.743	1195.79	251.332	808.469	988.472	229.225	946.145	694.647	1	1.96949	1.16422	2.08527	5.88887	7.12926	3.21673	3.93293	4.12758	3.03041
lipid0525	acylated plastidic lipids	acMGDG, ambiguous	MGDG-O(FA 16:3;O2) 36:8;O2 or MGDG-O(FA 18:1) 36:8;O2		-0.45363	-0.43115		0.53488	40.6867	45.2104	30.3306	43.6578	64.0984	22.9095	89.2856	131.584	46.7245	87.7849	114.369	27.5717	91.9351	80.9797	1	1.11118	1.4394	2.11332	3.89732	5.74366	1.87878	2.44774	3.3344	2.93706
lipid0528	acylated plastidic lipids	acMGDG, ambiguous	MGDG-O(FA 18:0) 34:8;O2 or MGDG-O(FA 18:0) 36:6					0.82523	51.3608	46.1927	40.4904	95.5374	68.0855	29.6649	444.664	291.712	53.8916	360.7	296.835	47.6909	446.777	160.913	1	0.899376	2.3595	1.68152	14.9896	9.83356	6.69307	5.508	9.36818	3.37408
lipid0516	acylated plastidic lipids	acMGDG, ambiguous	MGDG-O(FA 18:2) 36:6 or MGDG-O(FA 18:2) 34:8;O2	-0.47027				0.8242	153.028	224.576	117.524	624.183	404.596	94.7881	3436.35	2245.56	148.051	2612.89	1933.34	136.423	2765.37	742.436	1	1.46756	5.31109	3.44265	36.2529	23.6903	17.6486	13.0586	20.2705	5.44216
lipid0506	acylated plastidic lipids	acMGDG, ambiguous	MGDG-O(FA 18:3) 34:7;O2 or MGDG-O(FA 18:3) 36:5		0.42399			0.81261	147.961	159.578	149.678	1341.13	341.196	125.238	7185.24	2946.39	107.265	5571.15	2677.05	136.103	5203.39	776.225	1	1.07852	8.9601	2.27954	57.3725	23.5263	51.9381	24.9573	38.2313	5.70322
lipid0505	acylated plastidic lipids	acMGDG, ambiguous	MGDG-O(FA 18:3) 36:6 or MGDG-O(FA 18:3) 34:8;O2	-0.71042				0.82214	82.0003	308.176	159.427	6477.54	1540.83	58.3247	40428.1	21785.9	68.0045	26366.2	19604.2	88.4964	25820.8	4818.67	1	3.75823	40.6301	9.6648	693.156	373.529	387.713	288.278	291.772	54.4504
			total ambiguous acylated plastidic lipids						1452.13	2638.66	1415.11	12449.3	5902.71	963.504	69422.7	39347.2	1375	47599.2	35006.6	1331.39	47066.5	11177.7	1	1.8171	8.79737	4.1712	72.0523	40.8376	34.6175	25.4592	35.3515	8.39553
			total acylated plastidic lipids						8529.52	9355.84	5899.85	38879.5	17976.8	3983.05	183706	102915	6204.44	139607	94260.6	4981.79	131327	34349.6	1	1.09688	6.5899	3.04699	46.1221	25.8383	22.5012	15.1924	26.3615	6.89503
lipid0632	oxidized polar structural lipids	DGDG, oxidized	DGDG 16:0_18:3;O*		-0.51047			0.76088	19.8897	9.31177	8.60676	10.7755	21.9031	9.41553	8.89496	9.6267	11.4888	9.52623	8.78488	9.0838	25.7216	10.1959	1	0.468171	1.25198	2.54488	0.944712	1.02243	0.829173	0.764645	2.83159	1.12242
lipid0395	oxidized polar structural lipids	DGDG, oxidized	DGDG 16:0_18:3;O2*	0.34595	-0.34484		0.36779	0.68203	15.7975	4.38651	5.08717	7.82109	14.3702	6.0509	13.531	11.2508	20.3393	15.7334	11.5845	10.5086	21.1974	10.2843	1	0.277671	1.53742	2.82479	2.23619	1.85936	0.773544	0.569561	2.01715	0.978662
lipid0392	oxidized polar structural lipids	DGDG, oxidized	DGDG 16:0_18:4;O*					0.76782	4.58896	3.83232	3.43651	18.2405	22.434	3.09985	34.0381	28.2524	3.91456	27.7912	18.4695	3.96403	32.3914	8.50717	1	0.835117	5.30785	6.52812	10.9806	9.11411	7.09942	4.71814	8.17133	2.14609
lipid0639	oxidized polar structural lipids	DGDG, oxidized	DGDG 16:0_18:5;O2					-0.81807	84.8172	92.3824	77.049	93.4186	93.6071	74.0206	20.7915	41.6386	51.8722	29.5136	35.8761	69.3844	17.885	86.6612	1	1.08919	1.21246	1.2149	0.280888	0.562527	0.568967	0.691625	0.257767	1.249
lipid0339	oxidized polar structural lipids	DGDG, oxidized	DGDG 18:3;O_16:4;O**			-0.37117		0.7686	5.87863	5.5053	5.0942	5.85214	7.46952	4.81562	6.38134	6.94838	4.70418	6.55656	6.29239	4.22862	12.0833	4.78407	1	0.936494	1.14878	1.46628	1.32513	1.44288	1.39377	1.33762	2.8575	1.13135
lipid0634	oxidized polar structural lipids	DGDG, oxidized	DGDG 18:3;O_18:3*		-0.36165			0.71892	14.8719	15.7227	12.6964	14.9311	20.3661	13.0843	11.8447	14.7887	15.0218	12.7916	15.2093	12.49	26.1758	14.5777	1	1.05721	1.176	1.60408	0.905266	1.13027	0.85154	1.01248	2.09574	1.16715
lipid0394	oxidized polar structural lipids	DGDG, oxidized	DGDG 18:3;O2_16:3*		-0.34759			0.77555	8.2637	5.11222	3.81166	15.8617	31.1779	3.23924	17.0009	24.3343	4.4574	13.8361	10.5277	3.26145	19.0362	5.53556	1	0.618636	4.16136	8.17961	5.24842	7.51236	3.10408	2.36184	5.83673	1.69727
lipid0400	oxidized polar structural lipids	DGDG, oxidized	DGDG 18:3;O2_18:3 or DGDG 18:4;O_18:2;O**		-0.56455			0.79768	3.57872	3.15734	2.2688	4.15918	7.30571	2.40072	7.19913	6.29667	6.55379	7.54428	6.1827	3.61125	15.069	4.56916	1	0.882254	1.83321	3.22007	2.99874	2.62283	1.15113	0.943378	4.1728	1.26526
lipid0423	oxidized polar structural lipids	DGDG, oxidized	DGDG 18:3;O3_18:3*		-0.38273				17.2801	9.65358	10.16	13.6717	18.5984	9.76907	11.7097	8.87104	12.9386	10.6945	9.48955	10.0907	9.35615	7.94471	1	0.558653	1.34563	1.83055	1.19865	0.908074	0.826557	0.733427	0.927201	0.787326
lipid0348	oxidized polar structural lipids	DGDG, oxidized	DGDG 18:3;O4_16:4;O*		-0.43407			0.66795	14.5389	9.2682	6.30645	6.2926	12.6862	5.60775	7.82217	9.43375	6.78264	7.65581	7.62782	4.91463	16.5551	7.20304	1	0.637475	0.997803	2.01162	1.39489	1.68227	1.12874	1.12461	3.36853	1.46563
lipid0336	oxidized polar structural lipids	DGDG, oxidized	DGDG 18:3_16:4;O*	-0.54363	-0.45057	-0.39562		0.6018	6.71226	7.87089	7.10367	9.58751	12.6573	6.11004	12.3885	13.0649	6.48406	10.2061	10.9431	6.02252	10.0288	6.90176	1	1.17261	1.34966	1.7818	2.02757	2.13826	1.57404	1.6877	1.66521	1.14599
lipid0354	oxidized polar structural lipids	DGDG, oxidized	DGDG 18:3_18:5;O2	-0.36422	-0.54377	-0.45843		0.77606	53.6744	70.3579	50.3934	61.0522	73.9428	45.147	49.268	59.1643	51.6301	57.5168	50.4347	47.1416	97.2519	53.6137	1	1.31083	1.21151	1.46731	1.09128	1.31048	1.11402	0.976846	2.06297	1.13729
lipid0387	oxidized polar structural lipids	DGDG, oxidized	DGDG 18:4;O_16:3*		-0.45913			0.74286	8.51501	5.40896	4.27164	11.8347	19.8792	4.3075	16.119	17.4646	6.95628	13.2238	13.4737	4.45941	15.0633	6.16135	1	0.635227	2.77052	4.65377	3.74207	4.05446	1.90098	1.93691	3.37786	1.38165
lipid0390	oxidized polar structural lipids	DGDG, oxidized	DGDG 18:4;O_16:3;O*			-0.48932		0.55882	11.1659	7.55719	7.27554	9.38615	12.2505	5.9671	6.49853	8.38688	8.46876	7.23787	7.61769	6.88111	8.36171	5.37528	1	0.676806	1.2901	1.68379	1.08906	1.40552	0.854655	0.899504	1.21517	0.781165
lipid0338	oxidized polar structural lipids	DGDG, oxidized	DGDG 18:4;O_16:4;O (16:4;O as fragment; Arabidopside C)			-0.61828		-0.74646	23.7118	27.1212	23.0623	29.0757	31.7483	20.6669	17.3996	29.4206	25.2823	16.297	21.9071	22.2064	11.9646	19.121	1	1.14378	1.26074	1.37663	0.841909	1.42356	0.644604	0.866503	0.538788	0.861055
lipid0389	oxidized polar structural lipids	DGDG, oxidized	DGDG 18:4;O_16:4;O (18:4;O as fragment; Arabidopside C)	-0.36911	-0.45577	-0.52098		-0.82291	75.1314	80.5591	76.4928	83.5307	92.5336	68.1747	49.4614	72.8488	77.6406	47.7628	55.8295	75.734	32.7507	59.0278	1	1.07224	1.09201	1.2097	0.725509	1.06856	0.615178	0.719076	0.432443	0.779408
lipid0396	oxidized polar structural lipids	DGDG, oxidized	DGDG 18:4;O_18:3					0.81699	4.83657	6.70389	4.79705	49.5615	47.7702	4.99547	77.429	66.2849	6.15936	57.7116	39.5372	5.12907	53.5057	10.1719	1	1.38608	10.3317	9.95826	15.4998	13.269	9.36975	6.41905	10.4318	1.98319
lipid0399	oxidized polar structural lipids	DGDG, oxidized	DGDG 18:4;O_18:3;O**		-0.39068			0.80772	4.77578	3.46265	2.4427	5.07472	8.81334	2.63211	11.5194	10.0933	3.41384	10.331	8.76134	2.62546	26.7671	4.55862	1	0.725044	2.0775	3.60803	4.37649	3.83466	3.02622	2.56642	10.1952	1.73631
lipid0398	oxidized polar structural lipids	DGDG, oxidized	DGDG 18:4;O_18:4;O (Arabidopside D)*					0.7426	3.56789	4.80071	3.1157	26.6694	35.6214	2.85162	40.2088	48.1425	3.4057	27.8632	21.9872	2.54781	26.5768	7.73589	1	1.34553	8.55968	11.4329	14.1003	16.8825	8.18134	6.45599	10.4313	3.03629
lipid0402	oxidized polar structural lipids	DGDG, oxidized	DGDG 18:4;O_18:4;O2 or DGDG 18:4;O_20:2*					0.83835	5.08343	5.84239	4.26086	7.93167	8.03012	4.18682	23.1835	16.7171	5.59637	22.3195	14.2693	4.53268	44.957	6.83023	1	1.1493	1.86152	1.88462	5.53726	3.9928	3.98821	2.54975	9.91842	1.50688
lipid0341	oxidized polar structural lipids	DGDG, oxidized	DGDG 18:5;O2_16:4;O*		-0.34637			0.77169	13.3731	12.45	7.98032	8.93652	13.1804	7.21095	10.9746	11.3604	8.27554	11.0287	9.44061	6.726	20.3189	9.39597	1	0.930977	1.11982	1.65161	1.52193	1.57544	1.33268	1.14079	3.02095	1.39696
lipid0175	oxidized polar structural lipids	DGDG, ambiguous	DGDG 38:4 or DGDG 36:6;O2	-0.49035	-0.51322	-0.64582		-0.80309	72.0993	95.4412	66.7859	79.2765	127.444	53.2166	57.5384	96.3476	76.2829	60.3262	79.0915	58.5845	38.6381	64.3603	1	1.32375	1.18702	1.90824	1.08121	1.81048	0.790821	1.03682	0.659529	1.09859
lipid0173	oxidized polar structural lipids	DGDG, ambiguous	DGDG 38:6 or DGDG 36:8;O2	-0.54569	-0.62047	-0.57555		-0.87825	570.109	701.289	607.542	757.836	936.628	528.427	555.706	897.677	664.806	448.819	563.462	572.771	261.24	577.423	1	1.2301	1.24738	1.54167	1.05162	1.69877	0.675113	0.847558	0.456098	1.00812
			total oxidized DGDG						1042.26	1187.2	1000.04	1330.78	1670.42	885.398	1066.91	1508.41	1082.48	932.287	1026.8	946.899	842.895	990.939	1	1.13906	1.33072	1.67035	1.205	1.70366	0.861255	0.948566	0.890164	1.04651
lipid0435	oxidized polar structural lipids	MGDG, oxidized	MGDG 18:2;O_16:3*		-0.41543			-0.55718	18.2858	17.2097	11.993	14.1166	23.3612	11.4311	9.41385	13.6275	16.3774	8.57184	11.7702	10.5094	8.17524	11.4187	1	0.941154	1.17707	1.9479	0.823529	1.19214	0.523394	0.718685	0.777901	1.08652
lipid0437	oxidized polar structural lipids	MGDG, oxidized	MGDG 18:2;O_18:3*					-0.48082	21.6623	17.9035	15.6448	20.7395	23.246	16.0026	13.5888	14.8424	20.1595	12.3422	14.2119	14.5712	11.9146	13.5012	1	0.826483	1.32565	1.48586	0.849167	0.9275	0.61223	0.704975	0.817681	0.926567
lipid0424	oxidized polar structural lipids	MGDG, oxidized	MGDG 18:2;O3_18:3					-0.74131	46.9665	30.231	32.5268	37.2764	49.9933	31.3435	24.9016	29.074	36.5437	20.0467	20.9846	28.5685	16.0086	21.6141	1	0.643672	1.14602	1.53699	0.794475	0.927593	0.548567	0.574232	0.56036	0.756571
lipid0623	oxidized polar structural lipids	MGDG, oxidized	MGDG 18:3;O_16:3*		-0.39557	-0.47001	-0.43501	0.35727	14.5141	19.42	12.7198	20.5427	28.1561	10.7325	12.6335	20.3942	16.865	11.0164	18.6076	11.5466	17.5886	15.8836	1	1.33801	1.61502	2.21356	1.17712	1.90022	0.65321	1.10332	1.52328	1.37562
lipid0625	oxidized polar structural lipids	MGDG, oxidized	MGDG 18:3;O_16:4;O*		-0.51047	-0.3982		0.63887	18.3549	11.5852	9.13379	15.1975	29.0683	8.94026	10.9039	15.2322	11.2143	10.3311	11.2482	7.69586	13.4019	9.71678	1	0.63118	1.66388	3.1825	1.21964	1.70377	0.921236	1.00302	1.74144	1.2626
lipid0626	oxidized polar structural lipids	MGDG, oxidized	MGDG 18:3;O_18:3						30.6637	24.7749	24.0506	27.2806	29.1427	26.4506	20.262	22.9706	35.0404	22.5877	21.7142	31.0048	24.9283	25.03	1	0.807955	1.1343	1.21172	0.76603	0.868433	0.644617	0.619691	0.804015	0.807293
lipid0370	oxidized polar structural lipids	MGDG, oxidized	MGDG 18:3;O2_16:3*						11.2863	9.96518	7.97299	19.6213	25.7667	8.22763	14.5132	14.8479	23.142	13.7941	15.3861	11.5092	11.1038	12.1789	1	0.882942	2.46097	3.23175	1.76395	1.80464	0.596062	0.664855	0.964776	1.05818
lipid0374	oxidized polar structural lipids	MGDG, oxidized	MGDG 18:3;O2_16:4;O (18:4;O as fragment)*					0.76319	8.84766	6.42668	4.21422	15.4045	23.7318	4.6762	11.2795	12.5741	7.63206	9.09491	10.6102	4.50352	10.9747	6.3078	1	0.72637	3.65538	5.63137	2.4121	2.68895	1.19167	1.39021	2.43692	1.40064
lipid0330	oxidized polar structural lipids	MGDG, oxidized	MGDG 18:3;O2_16:4;O or MGDG 20:1_16:4;O (16:4;O as fragment)**			-0.36283		0.59511	11.4242	6.45435	6.42129	13.0546	19.8975	5.75141	8.52617	9.23928	6.5077	7.31419	7.40239	4.82486	7.80983	4.98017	1	0.564974	2.03302	3.09868	1.48245	1.60644	1.12393	1.13748	1.61866	1.03219
lipid0383	oxidized polar structural lipids	MGDG, oxidized	MGDG 18:3;O2_18:3;O**					0.80824	17.3969	5.60915	3.85917	7.18619	29.9568	3.79526	6.78958	7.65818	5.90567	7.02074	5.90519	3.93845	9.36284	4.3663	1	0.322423	1.86211	7.76251	1.78896	2.01783	1.18881	0.99992	2.37729	1.10864
lipid0318	oxidized polar structural lipids	MGDG, oxidized	MGDG 18:3;O3_16:3**		-0.60458	-0.52664			8.73473	9.5645	5.03383	6.52047	10.9478	5.04722	5.33147	8.21386	6.32125	5.54431	8.42337	4.96295	6.95784	6.41346	1	1.095	1.29533	2.17485	1.05632	1.6274	0.877092	1.33255	1.40196	1.29227
lipid0419	oxidized polar structural lipids	MGDG, oxidized	MGDG 18:3;O3_18:3*						28.861	16.0659	12.2587	15.5165	25.8963	13.737	14.2913	13.6572	16.3982	12.6883	13.063	13.0097	10.3686	11.532	1	0.556667	1.26575	2.11248	1.04035	0.994192	0.773762	0.796609	0.796985	0.886414
lipid0637	oxidized polar structural lipids	MGDG, oxidized	MGDG 18:3_16:3;O*	-0.47284	-0.47807	-0.39887	-0.37087	-0.38867	17.6419	24.0047	16.6202	15.3824	20.9821	14.1507	9.39295	16.177	19.9253	8.01862	15.1941	15.2219	13.0395	15.4954	1	1.36066	0.92552	1.26245	0.663782	1.1432	0.402433	0.762549	0.856627	1.01797
lipid0327	oxidized polar structural lipids	MGDG, oxidized	MGDG 18:3_16:3;O2*						6.98254	5.48303	5.01165	9.3046	11.986	5.16027	6.8296	7.1376	10.2114	6.07475	7.4865	5.69921	5.58321	6.88937	1	0.785249	1.85659	2.39163	1.3235	1.38318	0.594898	0.73315	0.979648	1.20883
lipid0323	oxidized polar structural lipids	MGDG, oxidized	MGDG 18:3_16:4;O					0.81544	20.6465	19.0165	19.1893	170.913	180.523	19.0116	109.438	102.35	22.6912	50.5244	58.4153	20.8862	56.835	23.2471	1	0.921053	8.90669	9.40749	5.75634	5.38355	2.22661	2.57436	2.72118	1.11304
lipid0837	oxidized polar structural lipids	MGDG, oxidized	MGDG 18:3_7:1;O*	-0.33308	-0.63484	-0.61828	-0.37255		13.0177	19.9879	7.92358	8.30726	37.8632	7.12121	8.04498	18.9738	8.27317	9.08605	13.3876	6.37163	8.45863	7.29707	1	1.53544	1.04842	4.77855	1.12972	2.66442	1.09825	1.6182	1.32755	1.14524
lipid0838	oxidized polar structural lipids	MGDG, oxidized	MGDG 18:3_7:1;O2*		-0.62261	-0.44427		0.3462	13.2184	8.28017	6.35949	7.29794	17.3923	5.18001	6.62084	9.94695	6.12389	6.21849	7.34929	4.35125	6.19022	5.22208	1	0.626413	1.14757	2.73486	1.27815	1.92026	1.01545	1.2001	1.42263	1.20013
lipid0836	oxidized polar structural lipids	MGDG, oxidized	MGDG 18:3_9:1;O2*		-0.47196	-0.34363			19.488	16.7522	8.17977	13.1149	20.8579	9.48464	8.43604	11.539	7.14294	12.5581	9.81414	6.46434	6.84905	6.80603	1	0.859617	1.60333	2.54994	0.889442	1.2166	1.75811	1.37396	1.05951	1.05286
lipid0358	oxidized polar structural lipids	MGDG, oxidized	MGDG 18:4;O_16:3						48.897	30.8765	33.0107	110.504	115.81	35.4699	57.2759	71.5115	149.195	57.9297	73.7008	79.6574	47.5037	60.4263	1	0.631459	3.34751	3.50826	1.61478	2.01612	0.388282	0.49399	0.59635	0.758576
lipid0362	oxidized polar structural lipids	MGDG, oxidized	MGDG 18:4;O_16:3;O*		-0.41238				16.6082	14.651	8.62375	14.0824	23.5995	9.08987	14.9003	16.6957	24.5137	18.6902	17.5474	13.8533	17.5418	17.7622	1	0.88215	1.63298	2.73657	1.63922	1.83673	0.762441	0.715821	1.26625	1.28216
lipid0325	oxidized polar structural lipids	MGDG, oxidized	MGDG 18:4;O_16:4;O (16:4;O as fragment; Arabidopside A)			-0.33076		0.5565	7.0002	9.53141	5.68106	136.637	187.556	4.58367	58.2531	85.0119	5.20733	31.3461	37.097	4.7489	30.716	17.9765	1	1.36159	24.0513	33.0143	12.7088	18.5467	6.01962	7.124	6.46802	3.7854
lipid0361	oxidized polar structural lipids	MGDG, oxidized	MGDG 18:4;O_16:4;O (18:4;O as fragment; Arabidopside A)		-0.51383	-0.35804		0.38893	29.627	19.1439	19.5182	75.7931	114.55	20.7874	44.6491	56.1802	55.3211	42.05	39.9758	32.4044	35.0044	30.3868	1	0.646163	3.8832	5.86888	2.14789	2.70261	0.760109	0.722615	1.08024	0.937738
lipid0366	oxidized polar structural lipids	MGDG, oxidized	MGDG 18:4;O_18:1 or MGDG 18:4;O_16:3;O2*					0.7045	12.1873	8.09911	7.23432	57.4352	93.0192	6.44377	17.6927	20.9149	8.82477	13.3459	15.2174	6.626	12.0527	6.86729	1	0.664555	7.93927	12.858	2.74571	3.24575	1.51233	1.72439	1.819	1.03642
lipid0372	oxidized polar structural lipids	MGDG, oxidized	MGDG 18:4;O_18:3					0.78996	8.21955	8.0343	7.63843	113.975	90.4046	6.5466	87.9337	64.3563	10.2838	51.832	52.3373	8.91191	63.8007	19.4714	1	0.977462	14.9212	11.8355	13.432	9.83048	5.04018	5.08931	7.15904	2.18488
lipid0376	oxidized polar structural lipids	MGDG, oxidized	MGDG 18:4;O_18:3;O*		-0.36715		0.48739	0.67207	16.7403	8.98481	8.0191	11.4978	18.5993	8.72564	10.5936	9.61227	12.3441	12.2002	10.1142	8.17346	16.4628	9.55343	1	0.536718	1.4338	2.31937	1.21408	1.10161	0.98834	0.819352	2.01418	1.16884
lipid0382	oxidized polar structural lipids	MGDG, oxidized	MGDG 18:4;O_18:3;O2 or MGDG 18:4;O_20:3*					0.82651	14.8485	6.52581	5.71459	12.1419	19.9575	4.91992	8.67531	8.74433	7.58556	8.25717	7.28035	5.78593	10.3953	5.36371	1	0.439494	2.12471	3.49237	1.7633	1.77733	1.08854	0.959764	1.79665	0.927026
lipid0385	oxidized polar structural lipids	MGDG, oxidized	MGDG 18:4;O_18:3;O3**		-0.46096			0.77143	8.50735	5.10777	3.63345	6.48415	12.9631	3.43465	8.05266	8.33205	4.40229	8.06747	7.89041	3.33564	13.4373	6.15835	1	0.600395	1.78457	3.56772	2.34454	2.42588	1.83256	1.79234	4.02839	1.84622
lipid0386	oxidized polar structural lipids	MGDG, oxidized	MGDG 18:4;O_18:3;O4**		-0.46707			0.73127	15.8373	6.41807	4.23048	6.77465	21.4141	3.56074	6.79331	8.16119	5.49508	7.23049	8.08084	3.60428	12.3313	6.12561	1	0.405249	1.60139	5.06186	1.90784	2.29199	1.31581	1.47056	3.42129	1.69954
lipid0375	oxidized polar structural lipids	MGDG, oxidized	MGDG 18:4;O_18:4;O (Arabidopside B)*					0.5601	8.04184	8.90999	6.04829	68.5026	75.1404	5.75109	40.9745	38.4778	6.66625	25.861	24.9956	5.1579	27.9199	18.3811	1	1.10795	11.3259	12.4234	7.12466	6.69051	3.87939	3.74957	5.41303	3.56369
lipid0381	oxidized polar structural lipids	MGDG, oxidized	MGDG 18:4;O_18:4;O2**		-0.41574			0.77014	11.8678	5.67161	3.59038	7.47672	20.1701	3.88816	7.30804	9.17364	5.53513	6.23783	6.68561	3.48928	9.47135	5.04709	1	0.477899	2.08243	5.61781	1.87956	2.35938	1.12695	1.20785	2.71441	1.44646
lipid0384	oxidized polar structural lipids	MGDG, oxidized	MGDG 18:4;O_18:4;O3 or MGDG 18:4;O_19:3;O2**		-0.51597	-0.33127		0.77375	9.46399	6.27463	3.37501	9.53346	23.0459	2.84624	7.22129	8.55127	4.29402	6.18628	7.10267	3.08856	8.36478	4.37484	1	0.663001	2.82472	6.82841	2.53713	3.00441	1.44067	1.65408	2.70832	1.41647
lipid0833	oxidized polar structural lipids	MGDG, oxidized	MGDG 18:4;O_9:1;O	0.33977					305.263	58.9207	70.5809	67.1459	211.842	69.0716	69.6427	65.2031	71.3703	76.14	54.7593	59.7328	82.3026	53.328	1	0.193016	0.951333	3.00141	1.00827	0.943994	1.06683	0.767256	1.37785	0.892775
lipid0609	oxidized polar structural lipids	MGDG, oxidized	MGDG 18:4;O2_16:3*					0.487	29.0886	13.4742	9.07005	12.651	25.3749	7.65268	9.3696	13.2743	10.6279	9.62156	10.7396	7.25234	12.4458	9.45518	1	0.463212	1.39481	2.79766	1.22436	1.7346	0.905312	1.01051	1.71611	1.30374
lipid0329	oxidized polar structural lipids	MGDG, oxidized	MGDG 18:4;O2_16:4;O or MGDG 20:2_16:4;O**		-0.47166	-0.34595	-0.34594	0.5686	7.41775	5.5989	3.9725	5.57955	11.5015	3.30709	5.48905	6.60533	3.9746	4.25598	5.58409	2.90903	5.95179	3.98337	1	0.754798	1.40455	2.89528	1.65978	1.99732	1.07079	1.40494	2.04597	1.36931
lipid0611	oxidized polar structural lipids	MGDG, oxidized	MGDG 18:4;O2_18:3**					0.73333	15.0881	7.62838	5.97804	7.83027	12.9509	6.08108	6.06673	7.04181	6.96028	5.95596	6.86085	5.72117	8.23116	4.85485	1	0.505591	1.30984	2.16641	0.997639	1.15799	0.855707	0.985715	1.43872	0.848575
lipid0317	oxidized polar structural lipids	MGDG, oxidized	MGDG 18:4;O3_16:3**		-0.46646	-0.42873			8.5795	9.72999	5.50925	10.3584	14.7073	4.87648	6.40818	9.90096	6.23242	5.88983	8.58644	4.48541	6.74553	6.82222	1	1.1341	1.88019	2.66957	1.3141	2.03035	0.945031	1.37771	1.50388	1.52098
lipid0316	oxidized polar structural lipids	MGDG, oxidized	MGDG 18:5;O2_16:3*		-0.50588	-0.51918		-0.60901	12.1614	13.0359	9.63912	11.9265	16.2924	8.89235	7.55402	12.6243	10.5559	8.20873	11.1283	8.58166	7.99305	10.9781	1	1.07192	1.2373	1.69024	0.849497	1.41968	0.777647	1.05423	0.93141	1.27925
lipid0328	oxidized polar structural lipids	MGDG, oxidized	MGDG 18:5;O2_16:4;O or MGDG 20:3_16:4;O**		-0.35646	-0.50116		0.45045	9.40282	8.2374	4.61844	6.60383	12.213	4.08512	5.19936	6.90515	4.73978	4.94468	6.24567	3.20306	6.15652	5.16058	1	0.876057	1.42988	2.64439	1.27276	1.69032	1.04323	1.31771	1.92208	1.61114
lipid0380	oxidized polar structural lipids	MGDG, oxidized	MGDG 18:5;O2_18:4;O or MGDG 20:3_18:4;O*					0.59099	24.848	5.63573	4.26372	8.93655	29.4844	4.5686	8.41608	9.53195	8.86009	8.21858	8.35328	5.20651	9.08059	6.00358	1	0.226808	2.09595	6.9152	1.84216	2.0864	0.927595	0.942799	1.74408	1.15309
lipid0139	oxidized polar structural lipids	MGDG, oxidized	MGDG 30:5;O2	0.3861		-0.49498		-0.75959	516.097	337.222	473.811	456.349	441.74	374.73	266.135	362.162	462.462	290.465	301.572	438.468	240.128	380.192	1	0.653409	0.963144	0.932311	0.710204	0.966463	0.628084	0.652101	0.547653	0.867091
lipid0138	oxidized polar structural lipids	MGDG, oxidized	MGDG 30:6;O		-0.50405	-0.61081	-0.37115		239.26	223.728	130.05	124.527	380.102	74.1291	105.93	271.704	100.592	119.33	218.025	79.53	102.251	111.535	1	0.935085	0.95753	2.92273	1.429	3.66528	1.18627	2.16741	1.28569	1.40243
lipid0137	oxidized polar structural lipids	MGDG, oxidized	MGDG 30:6;O2		-0.56089	-0.62754	-0.41681	-0.84427	619.2	570.193	478.259	432.172	616.044	370.552	221.59	508.385	499.208	238.924	454.043	404.824	197.286	375.308	1	0.920853	0.903636	1.2881	0.598	1.37197	0.478606	0.909526	0.487339	0.927091
lipid0831	oxidized polar structural lipids	MGDG, oxidized	MGDG 9:1;O_16:3*		-0.34912				78.3234	29.9696	19.2594	22.4707	62.6059	19.0639	20.8929	28.9811	24.9053	20.373	27.9789	14.6393	22.9829	24.238	1	0.382639	1.16674	3.25066	1.09594	1.52021	0.81802	1.12341	1.56995	1.65568
lipid0834	oxidized polar structural lipids	MGDG, oxidized	MGDG 9:1;O2_16:3*		-0.4081	-0.53411			29.5066	23.4618	13.9956	27.8363	31.2696	15.8362	10.2643	18.9179	10.0806	17.7106	15.3039	10.0749	7.76623	11.6213	1	0.795139	1.98893	2.23424	0.648156	1.1946	1.75691	1.51816	0.770852	1.15349
lipid0154	oxidized polar structural lipids	MGDG, ambiguous	MGDG 38:4 or MGDG 36:6;O2			-0.68288		-0.8417	323.483	328.154	322.338	447.947	508.811	265.315	196.212	375.711	338.5	196.86	302.039	286.925	141.946	275.527	1	1.01444	1.38968	1.5785	0.739544	1.4161	0.581567	0.892287	0.494713	0.960274
lipid0152	oxidized polar structural lipids	MGDG, ambiguous	MGDG 38:6 or MGDG 36:8;O2			-0.39768		-0.6018	540.27	469.422	521.658	1411.13	1482.67	490.267	693.317	873.301	612.957	485.457	630.814	516.06	393.59	705.674	1	0.868866	2.7051	2.84223	1.41416	1.78128	0.791991	1.02913	0.762682	1.36743
			total oxidized MGDG						3293.83	2511.38	2398.43	4121.08	5282.61	2040.72	2304.01	3324.43	2748.17	2014.42	2641.03	2232.09	1795.41	2400.48	1	0.762449	1.71824	2.20252	1.12902	1.62905	0.733005	0.961015	0.804363	1.07544
lipid0432	oxidized polar structural lipids	PG, oxidized	PG 18:2;O_16:0*		-0.3754			0.69138	36.4184	29.9651	19.0777	19.9325	38.4483	17.9426	17.0679	23.6775	25.7052	18.1696	24.6648	14.4543	37.2374	20.8744	1	0.8228	1.04481	2.01536	0.95125	1.31963	0.706847	0.959528	2.57622	1.44416
lipid0431	oxidized polar structural lipids	PG, oxidized	PG 18:2;O_16:1*					0.60026	35.9136	24.4638	16.8635	21.061	34.4514	16.093	15.8529	21.2679	24.0186	15.7529	21.675	13.2209	31.2954	16.7356	1	0.681185	1.24891	2.04296	0.985083	1.32156	0.655864	0.902425	2.36711	1.26584
lipid0353	oxidized polar structural lipids	PG, oxidized	PG 18:2_16:0;O		-0.38762	-0.43063		-0.60566	49.7215	39.375	42.1046	41.5323	48.7162	34.5553	30.3348	36.5133	45.0851	27.0967	28.3602	37.0797	20.8531	26.6673	1	0.79191	0.986406	1.15703	0.877863	1.05666	0.601013	0.629038	0.562386	0.719188
lipid0622	oxidized polar structural lipids	PG, oxidized	PG 18:3;O_16:0		-0.52086			0.64736	34.9154	33.168	21.6116	20.4711	38.8311	17.661	20.5701	27.9558	27.8091	21.3663	28.6365	19.5393	46.6428	26.323	1	0.949954	0.947227	1.79678	1.16472	1.58291	0.76832	1.02975	2.38713	1.34719
lipid0621	oxidized polar structural lipids	PG, oxidized	PG 18:3;O_16:1		-0.34454		-0.42521	0.64788	40.7832	28.7489	24.8489	25.9823	39.8953	18.277	27.6354	33.3571	34.9594	20.6232	36.1172	17.9604	69.3762	31.0153	1	0.70492	1.04561	1.60552	1.51203	1.82509	0.589919	1.03312	3.86274	1.72687
lipid0417	oxidized polar structural lipids	PG, oxidized	PG 18:3;O3_16:0*		-0.58961				26.1442	20.229	11.986	13.7467	32.2856	12.1514	14.7706	22.1742	17.1159	13.1442	19.9537	11.3637	11.5132	14.9934	1	0.773746	1.14689	2.69361	1.21555	1.82483	0.767955	1.1658	1.01316	1.31942
lipid0357	oxidized polar structural lipids	PG, oxidized	PG 18:4;O_16:0		-0.38946	-0.36448		0.74414	19.5446	21.1048	12.4427	31.0267	59.531	11.8222	50.9045	58.8074	14.8022	29.8413	40.326	11.0139	46.5005	24.7411	1	1.07982	2.49358	4.78443	4.30586	4.97434	2.016	2.72433	4.22198	2.24636
lipid0356	oxidized polar structural lipids	PG, oxidized	PG 18:4;O_16:1		-0.50252			0.77709	18.7339	26.7763	16.1108	83.6363	138.293	16.0139	153.92	167.792	18.7918	68.1876	93.4178	14.1781	69.6735	31.7922	1	1.4293	5.19132	8.58388	9.61169	10.4779	3.62859	4.9712	4.91415	2.24234
lipid0364	oxidized polar structural lipids	PG, oxidized	PG 18:4;O_18:2*					0.77323	22.7884	11.7011	8.44919	13.4375	21.9966	7.7425	14.831	14.3893	11.4174	13.5099	13.3906	7.93706	20.4135	10.1877	1	0.513465	1.5904	2.6034	1.91554	1.85849	1.18328	1.17283	2.57192	1.28357
lipid0363	oxidized polar structural lipids	PG, oxidized	PG 18:4;O_18:3*					0.67851	12.2796	11.6448	8.44651	16.0756	20.2222	8.58314	15.9503	16.08	18.1859	17.5255	19.5536	10.7193	22.6889	15.3616	1	0.948307	1.90322	2.39415	1.85833	1.87344	0.963687	1.07521	2.11664	1.43308
lipid0023	oxidized polar structural lipids	PG, oxidized	PG 34:2;O*		-0.61406	-0.63964	-0.41373	-0.44093	14.8465	18.0997	15.3888	12.5567	19.0631	11.2856	9.14407	15.0222	13.1571	11.5368	17.587	10.843	10.8224	14.3075	1	1.21912	0.815963	1.23876	0.810242	1.33109	0.876846	1.33669	0.9981	1.31952
lipid0022	oxidized polar structural lipids	PG, oxidized	PG 34:3;O	-0.41081	-0.37479	-0.5009	-0.37115	-0.68108	33.1202	39.1057	31.3055	30.2109	36.889	28.3636	20.326	31.1438	32.5471	20.1162	29.0215	27.1362	19.2011	28.3314	1	1.18072	0.965034	1.17835	0.716622	1.09802	0.618064	0.891676	0.707581	1.04404
lipid0021	oxidized polar structural lipids	PG, oxidized	PG 34:4;O	-0.48391	-0.68434	-0.57761	-0.48151	-0.6846	22.4049	33.4711	20.381	20.3599	33.0753	19.1043	17.0091	28.5766	24.5927	16.9819	27.8447	18.5133	17.1206	26.7023	1	1.49392	0.998965	1.62285	0.890331	1.49582	0.690527	1.13223	0.924773	1.44233
lipid0020	oxidized polar structural lipids	PG, oxidized	PG 34:5;O*	-0.45534	-0.49213	-0.39614	-0.33445	-0.57272	20.143	23.6084	19.613	19.0664	22.9507	16.7402	13.7259	20.1327	21.5113	12.964	18.877	17.584	12.1243	17.6703	1	1.17204	0.972129	1.17018	0.819939	1.20266	0.602663	0.877539	0.689509	1.00491
			total oxidized PG						387.758	361.462	268.63	369.096	584.649	236.336	422.043	516.889	329.699	306.816	419.426	231.543	435.463	305.703	1	0.932185	1.37399	2.17641	1.78578	2.1871	0.930596	1.27215	1.8807	1.32029
lipid0436	oxidized polar structural lipids	PC, oxidized	PC 16:0_18:2;O*					-0.39434	43.118	27.4544	24.8197	19.9829	29.3005	28.9233	17.6058	21.8502	29.496	18.783	25.4355	18.7828	17.7163	21.817	1	0.636728	0.805123	1.18053	0.608707	0.755451	0.636797	0.862335	0.943217	1.16154
lipid0624	oxidized polar structural lipids	PC, oxidized	PC 16:0_18:3;O		-0.44782	-0.35701		-0.52252	48.2759	33.6949	31.0819	25.9457	37.3702	27.981	21.8791	27.4556	37.1302	25.964	34.1416	24.9084	24.3884	30.8723	1	0.697966	0.834753	1.20231	0.781927	0.981222	0.699268	0.919509	0.97912	1.23943
lipid0371	oxidized polar structural lipids	PC, oxidized	PC 16:0_18:3;O2*		-0.38246		0.38151		20.0668	9.5631	10.75	17.3561	20.0624	11.1854	17.9652	16.2819	34.6357	24.1556	19.8743	17.5629	15.5983	20.0188	1	0.476564	1.61452	1.86627	1.60614	1.45565	0.697418	0.57381	0.888141	1.13983
lipid0610	oxidized polar structural lipids	PC, oxidized	PC 16:0_18:4;O2**		-0.37479				23.7928	8.18372	6.27307	7.8089	15.728	5.51001	5.73494	7.33424	6.98846	6.05583	6.17584	4.74185	5.46991	4.9028	1	0.343958	1.24483	2.50722	1.04082	1.33108	0.866547	0.88372	1.15354	1.03394
lipid0439	oxidized polar structural lipids	PC, oxidized	PC 18:2;O_18:2*			-0.3529		-0.64633	20.4112	20.5659	17.2105	14.8452	19.4829	15.307	12.0081	16.7937	20.8238	11.6783	16.7201	14.9324	9.33408	14.3545	1	1.00758	0.862568	1.13204	0.784483	1.09712	0.560815	0.802934	0.625088	0.961299
lipid0438	oxidized polar structural lipids	PC, oxidized	PC 18:2;O_18:3*					-0.71403	26.6279	22.6484	18.3338	17.9816	23.7022	16.6553	15.995	18.9551	21.2737	17.2661	18.8304	16.3203	12.5693	20.4649	1	0.850551	0.980791	1.29282	0.960353	1.13808	0.811617	0.885153	0.770165	1.25395
lipid0628	oxidized polar structural lipids	PC, oxidized	PC 18:2_18:3;O*					-0.4121	20.3866	19.4084	14.5049	15.3927	20.4641	14.0809	15.0498	19.5119	21.1589	17.3854	22.1644	13.661	13.0434	16.3038	1	0.952018	1.06121	1.41084	1.06881	1.3857	0.821659	1.04752	0.954793	1.19346
lipid0379	oxidized polar structural lipids	PC, oxidized	PC 18:2_18:3;O2*				0.41064	-0.45148	11.3664	9.25927	7.34433	9.97696	12.9708	6.49544	9.31746	10.4574	16.8836	11.2281	12.095	10.227	6.80653	12.4361	1	0.814618	1.35846	1.76609	1.43446	1.60996	0.665032	0.716376	0.665547	1.21602
lipid0421	oxidized polar structural lipids	PC, oxidized	PC 18:3;O3_18:2*		-0.43071			-0.48288	16.4691	12.1624	10.3516	11.4461	15.8975	10.8182	11.4432	10.7409	11.9457	10.5397	10.6524	9.93088	6.24809	8.65779	1	0.738499	1.10573	1.53575	1.05777	0.99285	0.882304	0.891739	0.629157	0.871805
lipid0420	oxidized polar structural lipids	PC, oxidized	PC 18:3;O3_18:3*		-0.43499			-0.54131	20.7743	14.4577	10.9895	12.2258	18.9376	10.8304	12.2838	13.9768	12.5823	11.2446	12.4817	10.6901	7.42352	11.249	1	0.695942	1.1125	1.72325	1.13419	1.29052	0.893684	0.992004	0.694427	1.05228
lipid0627	oxidized polar structural lipids	PC, oxidized	PC 18:3_18:3;O*		-0.37693				27.5735	19.0053	16.3972	17.3244	24.8875	14.7709	18.7701	21.8296	21.8949	21.3631	24.4179	15.5841	18.293	20.543	1	0.68926	1.05655	1.51779	1.27075	1.47788	0.975711	1.11523	1.17382	1.3182
lipid0378	oxidized polar structural lipids	PC, oxidized	PC 18:3_18:3;O2*						9.99304	7.74979	5.90679	8.78425	11.0866	5.71505	9.03538	10.4395	14.1627	10.8115	12.7048	8.68489	8.08821	12.8221	1	0.77552	1.48714	1.87693	1.58098	1.82668	0.763373	0.897057	0.931296	1.47637
lipid0613	oxidized polar structural lipids	PC, oxidized	PC 18:4;O2_18:2**		-0.41024				11.4163	7.57364	3.79231	5.22906	11.4274	3.6547	4.17359	6.02113	4.9567	3.61322	5.76402	3.66898	3.8477	5.27622	1	0.663409	1.37886	3.01329	1.14198	1.6475	0.728958	1.16288	1.04871	1.43806
			total oxidized PC						300.272	211.727	177.756	184.3	261.318	171.928	171.261	201.648	253.933	190.088	221.458	169.696	148.827	199.718	1	0.705118	1.03682	1.4701	0.996125	1.17287	0.748578	0.872113	0.877021	1.17692
lipid0349	oxidized polar structural lipids	PE, oxidized	PE 16:0;O_18:2				0.45602		47.2334	36.9185	36.635	43.1874	43.4141	30.8052	34.1245	36.1906	39.482	37.4521	32.4373	33.5879	33.3676	30.6696	1	0.781618	1.17886	1.18504	1.10775	1.17482	0.948588	0.821572	0.993441	0.913114
lipid0427	oxidized polar structural lipids	PE, oxidized	PE 16:0_18:2;O					0.43012	46.7931	29.4945	22.3332	25.9362	41.0456	22.5584	22.4562	24.8515	31.8558	21.9023	31.5719	17.7838	29.7207	21.4884	1	0.630317	1.16133	1.83788	0.995469	1.10165	0.687544	0.991087	1.67122	1.20831
lipid0618	oxidized polar structural lipids	PE, oxidized	PE 16:0_18:3;O						67.4844	43.6891	44.5273	37.7275	56.3389	35.0793	31.9941	34.3773	69.8691	31.4578	40.7846	27.4254	46.4269	39.2656	1	0.647396	0.847289	1.26527	0.912048	0.979986	0.450239	0.583728	1.69284	1.43172
lipid0355	oxidized polar structural lipids	PE, oxidized	PE 16:0_18:3;O2*				0.37059		23.0522	12.5082	11.7705	13.4269	20.1745	11.2141	13.8889	14.1511	27.1905	16.6038	17.6258	14.8613	14.2612	21.3534	1	0.542605	1.14072	1.71399	1.23852	1.2619	0.610645	0.648234	0.959619	1.43685
lipid0413	oxidized polar structural lipids	PE, oxidized	PE 16:0_18:3;O3		-0.56944	-0.53694		-0.59459	66.272	67.5589	44.645	39.6119	55.7476	34.0033	33.3195	55.8653	41.0675	33.9867	34.4487	47.2346	21.7652	35.0933	1	1.01942	0.887264	1.24869	0.979889	1.64294	0.827581	0.838832	0.460789	0.742957
lipid0604	oxidized polar structural lipids	PE, oxidized	PE 16:0_18:4;O2*		-0.37082			0.33462	56.7715	13.8793	10.2936	12.4034	36.7427	8.52059	10.0743	14.502	12.4488	9.93183	11.1705	7.80088	13.5648	10.5416	1	0.244476	1.20496	3.56947	1.18235	1.702	0.797817	0.897315	1.73888	1.35134
lipid0428	oxidized polar structural lipids	PE, oxidized	PE 18:1;O2_16:0*						39.5426	17.6546	12.8665	16.4794	32.1975	12.9523	13.7347	15.3663	17.4913	12.497	13.6872	11.8521	11.7325	11.626	1	0.44647	1.2808	2.50243	1.06041	1.18637	0.714469	0.782517	0.989912	0.98092
lipid0434	oxidized polar structural lipids	PE, oxidized	PE 18:1;O2_18:2*					0.47876	43.0927	18.3073	13.7267	18.9396	32.4328	12.9507	15.5951	16.0627	19.0971	13.313	13.6078	12.8315	18.2266	11.998	1	0.424835	1.37977	2.36276	1.20418	1.24029	0.697121	0.712559	1.42045	0.935038
lipid0433	oxidized polar structural lipids	PE, oxidized	PE 18:1;O2_18:3*					0.66178	45.9455	21.5529	15.2376	20.4147	38.9811	15.3359	16.9468	21.2552	20.2529	15.932	17.8579	15.2605	26.1291	14.7116	1	0.469097	1.33976	2.55822	1.10504	1.38598	0.786652	0.881746	1.7122	0.96403
lipid0430	oxidized polar structural lipids	PE, oxidized	PE 18:2;O_18:2		-0.44752	-0.44916			43.7231	33.3103	22.3921	22.8429	45.3026	20.4401	18.7304	26.491	29.4287	19.4289	25.5903	19.1462	26.0578	24.7032	1	0.761846	1.02013	2.02315	0.916359	1.29603	0.660204	0.869568	1.36099	1.29024
lipid0429	oxidized polar structural lipids	PE, oxidized	PE 18:2;O_18:3		-0.44996	-0.37169			69.4531	33.2056	22.4228	23.7958	56.9489	21.3683	21.1992	27.1612	30.3546	22.8693	24.5631	19.8323	24.8426	21.5939	1	0.4781	1.06123	2.53978	0.992084	1.2711	0.753403	0.809206	1.25264	1.08882
lipid0620	oxidized polar structural lipids	PE, oxidized	PE 18:2_18:3;O						68.5864	39.3702	37.0048	32.0449	51.2417	29.8223	25.681	32.4086	50.549	26.2128	34.2368	21.4133	39.2456	31.1846	1	0.574024	0.865964	1.38473	0.861134	1.08672	0.518562	0.677299	1.83277	1.45632
lipid0360	oxidized polar structural lipids	PE, oxidized	PE 18:2_18:3;O2*		-0.49488				24.0534	13.7597	9.82842	12.1264	21.907	9.2256	11.6784	13.8127	18.3193	12.4739	15.5764	11.1978	10.6312	14.0554	1	0.572049	1.23381	2.22894	1.26587	1.49722	0.680916	0.850274	0.949399	1.25519
lipid0415	oxidized polar structural lipids	PE, oxidized	PE 18:2_18:3;O3		-0.4851	-0.35573	0.34482	-0.62986	76.1435	60.8496	45.6193	41.5925	57.0621	39.0295	35.9814	48.7598	40.6848	37.8738	35.3333	43.9839	23.2439	40.2031	1	0.799144	0.911731	1.25083	0.921902	1.24931	0.930906	0.868463	0.528465	0.914041
lipid0619	oxidized polar structural lipids	PE, oxidized	PE 18:3_18:3;O*						82.2912	30.4304	28.6269	27.6918	41.4311	22.2217	18.9907	22.1683	37.5711	23.7419	26.8672	18.1484	31.2958	22.8985	1	0.36979	0.967335	1.44728	0.854599	0.997598	0.631918	0.715103	1.72444	1.26173
lipid0359	oxidized polar structural lipids	PE, oxidized	PE 18:3_18:3;O2*		-0.36746			0.36525	27.5584	14.3149	10.758	14.2854	25.4268	9.71989	13.774	15.829	18.2645	14.9403	15.8768	12.2778	16.799	14.9017	1	0.51944	1.32788	2.36352	1.4171	1.62851	0.817996	0.869271	1.36824	1.21372
lipid0414	oxidized polar structural lipids	PE, oxidized	PE 18:3_18:3;O3		-0.35829	-0.36474	0.52577	-0.59073	63.1334	44.2368	31.0919	30.3565	42.0036	24.6827	25.6238	33.5874	28.8706	28.5229	24.7267	28.5868	16.8698	24.5527	1	0.700688	0.976348	1.35095	1.03813	1.36077	0.987957	0.856466	0.590124	0.858882
lipid0606	oxidized polar structural lipids	PE, oxidized	PE 18:4;O2_18:2*						44.1604	13.4421	9.65457	12.174	30.1402	8.56694	9.77811	12.3537	11.0533	8.39777	9.37068	7.86924	8.78643	7.83766	1	0.304393	1.26096	3.12186	1.14138	1.44202	0.759749	0.847769	1.11655	0.995987
lipid0605	oxidized polar structural lipids	PE, oxidized	PE 18:4;O2_18:3*						60.3233	14.4566	10.6244	13.6233	37.5764	9.71635	11.062	14.6739	13.0849	11.0245	10.6277	9.54011	10.2612	9.04506	1	0.239653	1.28226	3.53679	1.1385	1.51023	0.842532	0.81221	1.07558	0.948109
			total oxidized PE						995.614	558.94	440.059	458.661	766.115	378.213	384.633	479.868	556.936	398.562	435.961	380.634	423.228	407.723	1	0.561402	1.04227	1.74094	1.01697	1.26878	0.715634	0.782784	1.1119	1.07117
			total oxidized polar glycerolipids						6019.73	4830.7	4284.92	6463.92	8565.11	3712.59	4348.85	6031.25	4971.21	3842.18	4744.68	3960.86	3645.82	4304.56	1	0.802478	1.50853	1.9989	1.17138	1.62454	0.772885	0.95443	0.920462	1.08677
lipid0157	monoacyl polar lipids	DGMG, non-oxidized	DGMG 16:0	-0.66255				0.62214	55.9978	113.835	54.3632	252.167	128.274	40.7689	175.239	148.023	59.9871	211.638	182.503	55.5643	110.393	88.503	1	2.03285	4.63855	2.35957	4.29835	3.63078	3.52806	3.04237	1.98676	1.5928
lipid0156	monoacyl polar lipids	DGMG, non-oxidized	DGMG 16:3	-0.44453				0.45097	65.0758	127.234	52.5981	153.858	145.003	42.3122	98.2058	108.768	62.7323	97.1487	98.0169	41.7724	77.7948	52.4812	1	1.95517	2.92516	2.75681	2.32098	2.5706	1.54862	1.56246	1.86235	1.25636
lipid0159	monoacyl polar lipids	DGMG, non-oxidized	DGMG 18:3	-0.57735				0.67465	183.718	347.555	132.361	1132.31	426.216	118.16	588.951	416.372	162.052	569.489	472.533	163.008	344.5	190.931	1	1.89179	8.55471	3.2201	4.98437	3.5238	3.51424	2.91594	2.11339	1.1713
lipid0158	monoacyl polar lipids	DGMG, oxidized	DGMG 16:4;O	-0.56963		-0.39794	-0.50308		41.9515	141.79	35.1358	45.4781	104.114	22.8374	117.226	150.94	29.8286	76.6671	135.121	24.2151	49.3521	52.8578	1	3.37986	1.29435	2.9632	5.13309	6.60934	2.57026	4.52993	2.03807	2.18285
lipid0160	monoacyl polar lipids	DGMG, oxidized	DGMG 18:4;O	-0.4906	-0.39954	-0.47619	-0.42381	0.52613	36.5167	67.1701	24.3533	37.3151	73.144	19.1108	40.244	74.5157	29.0928	44.2674	58.4991	20.502	33.1296	30.8909	1	1.83944	1.53224	3.00346	2.10582	3.89913	1.52159	2.01078	1.61592	1.50673
			total DGMG						383.26	797.585	298.811	1621.13	876.751	243.189	1019.87	898.618	343.693	999.211	946.673	305.062	615.169	415.664	1	2.08105	5.42526	2.93413	4.19372	3.69514	2.90728	2.75442	2.01654	1.36256
lipid0133	monoacyl polar lipids	MGMG, non-oxidized	MGMG 16:0	-0.47465	-0.48969	-0.57503	-0.45826	-0.45251	409.727	1023.34	328.954	281.671	890.616	187.703	227.689	941.972	267.613	301.948	845.133	199.324	278.881	443.329	1	2.49761	0.856263	2.70742	1.21303	5.01842	1.1283	3.15804	1.39913	2.22416
lipid0132	monoacyl polar lipids	MGMG, non-oxidized	MGMG 16:3			-0.66049	-0.36835	-0.55701	955.031	824.855	551.99	943.838	1204.88	426.38	424.082	840.918	562.038	435.272	742.213	419.651	405.226	601.735	1	0.863694	1.70988	2.18279	0.99461	1.97223	0.774452	1.32057	0.965626	1.43389
lipid0135	monoacyl polar lipids	MGMG, non-oxidized	MGMG 18:3	-0.43037					505.615	589.602	451.997	812.501	674.823	375.378	365.151	578.615	492.832	415.004	613.303	438.087	446.93	430.59	1	1.16611	1.79758	1.49298	0.972755	1.54142	0.842081	1.24445	1.02019	0.982886
lipid0134	monoacyl polar lipids	MGMG, oxidized	MGMG 16:4;O			-0.52432	-0.35686	-0.661	1443.65	991.386	836.737	1015.02	1322.38	553.769	603.287	1117.05	753.334	560.435	853.023	612.326	428.78	571.608	1	0.68672	1.21307	1.5804	1.08942	2.01717	0.743939	1.13233	0.700248	0.933503
lipid0136	monoacyl polar lipids	MGMG, oxidized	MGMG 18:4;O		-0.51383	-0.64685	-0.37507		408.676	483.036	322.517	331.847	523.4	237.951	288.262	492.608	336.325	331.431	499.967	241.057	310.533	312.943	1	1.18195	1.02893	1.62286	1.21143	2.07021	0.985449	1.48656	1.28821	1.29821
			total MGMG						3722.7	3912.21	2492.2	3384.88	4616.09	1781.18	1908.47	3971.16	2412.14	2044.09	3553.64	1910.45	1870.35	2360.21	1	1.05091	1.35819	1.85222	1.07146	2.22951	0.847417	1.47323	0.979013	1.23542
lipid0177	monoacyl polar lipids	SQMG, non-oxidized	SQMG 16:0		-0.4961			0.80695	48.1284	28.9673	17.4075	26.6417	40.3589	14.7754	27.5809	30.7629	18.5816	34.3217	32.5503	14.2115	65.8586	25.3272	1	0.601874	1.53047	2.31848	1.86668	2.08204	1.84708	1.75175	4.63417	1.78216
lipid0178	monoacyl polar lipids	SQMG, non-oxidized	SQMG 18:3		-0.55997			0.80077	36.6027	29.4322	16.521	22.3693	40.6652	14.7586	23.293	29.3074	18.7415	29.5723	28.0273	14.8304	40.396	22.4353	1	0.804098	1.35399	2.46142	1.57827	1.98579	1.5779	1.49546	2.72387	1.51279
			total SQMG						84.7312	58.3994	33.9285	49.0109	81.0241	29.5339	50.8738	60.0704	37.3232	63.894	60.5776	29.0419	106.255	47.7625	1	0.689232	1.44453	2.38808	1.72256	2.03394	1.71191	1.62306	3.65867	1.64461
lipid0001	monoacyl polar lipids	LPG, non-oxidized	LPG 16:1				-0.48852	0.54054	1191.2	1990.77	628.882	2153.09	1985.49	1680.49	2939.44	3416.67	2247.17	1276.98	3276.73	915.284	5159.04	1274.83	1	1.67124	3.42368	3.15717	1.74915	2.03313	0.568264	1.45816	5.63655	1.39283
lipid0005	monoacyl polar lipids	LPG, non-oxidized	LPG 18:1		-0.57708	-0.34166		-0.59897	1294.43	1477.8	953.589	557.899	1637.81	614.856	569.948	1147.2	559.299	486.368	827.262	711.563	497.27	895.063	1	1.14166	0.585052	1.71752	0.926963	1.8658	0.869602	1.4791	0.698842	1.25788
lipid0004	monoacyl polar lipids	LPG, non-oxidized	LPG 18:2					-0.50862	3977.26	1518.84	1861.03	1714.59	2168.05	1491.11	1090.98	1273.61	1361	926.046	872.852	1455.91	996.455	1323.18	1	0.381881	0.921313	1.16497	0.731657	0.854133	0.680418	0.641333	0.684422	0.908837
lipid0006	monoacyl polar lipids	LPG, oxidized	LPG 18:4;O		-0.36471			-0.73841	1610.16	1411.41	1767.59	1311.6	1586.09	1631.87	1256.61	1166.11	1182.57	593.94	760.535	1191.31	540.696	1067.32	1	0.876561	0.74203	0.897318	0.770043	0.714584	0.502243	0.643118	0.453867	0.895924
			total LPG						8073.06	6398.82	5211.09	5737.18	7377.43	5418.33	5856.98	7003.58	5350.04	3283.34	5737.38	4274.06	7193.46	4560.4	1	0.792614	1.10096	1.41572	1.08096	1.29257	0.613704	1.0724	1.68305	1.06699
lipid0025	monoacyl polar lipids	LPC, non-oxidized	LPC 16:0					0.73951	13.9541	21.6177	12.5228	201.802	68.8825	46.4816	52.1525	55.2433	13.7532	59.2606	57.4499	20.5248	68.9012	23.6942	1	1.5492	16.1147	5.50055	1.122	1.1885	4.30887	4.17722	3.35697	1.15442
lipid0029	monoacyl polar lipids	LPC, non-oxidized	LPC 18:0**					0.75856	1.95427	2.68225	2.0809	6.90922	6.11478	6.79116	5.89739	7.29968	2.37177	7.59749	9.95074	2.842	8.97322	3.08002	1	1.37251	3.3203	2.93853	0.868392	1.07488	3.20329	4.19549	3.15737	1.08375
lipid0028	monoacyl polar lipids	LPC, non-oxidized	LPC 18:1*					0.61261	5.57716	5.77234	5.94014	15.4373	15.3906	18.0559	8.57337	15.3048	6.55789	13.4449	15.756	6.43544	15.7586	8.28205	1	1.035	2.59881	2.59096	0.474823	0.847632	2.05019	2.40259	2.44872	1.28694
lipid0027	monoacyl polar lipids	LPC, non-oxidized	LPC 18:2					0.50013	34.9659	29.0942	28.0918	93.7331	101.339	37.6	82.5175	77.5264	32.63	75.3367	69.6379	34.0677	60.9464	37.1211	1	0.832074	3.33667	3.60741	2.19461	2.06187	2.30882	2.13417	1.78898	1.08963
lipid0026	monoacyl polar lipids	LPC, non-oxidized	LPC 18:3		-0.41513			0.32921	40.6886	30.472	28.8529	74.3616	91.6167	30.7724	74.5307	65.3933	32.3074	80.7799	59.8872	29.9273	65.5771	45.1271	1	0.748908	2.57727	3.17531	2.422	2.12507	2.50036	1.85367	2.19121	1.50789
			total LPC						97.1401	89.6385	77.4885	392.243	283.343	139.701	223.671	220.768	87.6202	236.42	212.682	93.7972	220.156	117.304	1	0.922776	5.06196	3.65658	1.60107	1.58028	2.69823	2.42731	2.34715	1.25062
lipid0052	monoacyl polar lipids	LPE, non-oxidized	LPE 16:0		-0.42857			0.64736	36.008	31.437	27.2405	71.9351	85.9413	26.1036	101.308	84.7144	26.1736	120.819	96.9367	27.0309	95.1672	43.1634	1	0.873055	2.64073	3.1549	3.881	3.24531	4.61604	3.7036	3.52068	1.59682
lipid0055	monoacyl polar lipids	LPE, non-oxidized	LPE 18:1*		-0.51016	-0.49395	-0.54678	0.48597	20.0038	18.7162	15.3445	19.4866	37.3382	9.68049	17.9582	33.6777	17.1372	17.7437	42.757	9.84447	18.9486	13.0997	1	0.935631	1.26994	2.43333	1.8551	3.47893	1.03539	2.49499	1.9248	1.33067
lipid0054	monoacyl polar lipids	LPE, non-oxidized	LPE 18:2		-0.61467				40.1924	38.5783	28.4853	59.0034	96.2539	27.396	75.526	86.1715	35.2549	68.6738	83.9422	31.1032	42.9059	38.6299	1	0.959841	2.07136	3.37908	2.75683	3.1454	1.94792	2.38101	1.37947	1.24199
lipid0053	monoacyl polar lipids	LPE, non-oxidized	LPE 18:3		-0.48388				34.0859	32.4809	24.3257	45.2824	65.2939	21.6806	46.5951	52.8853	31.5686	43.0972	52.6168	25.5855	28.9221	31.011	1	0.952911	1.8615	2.68415	2.14916	2.43929	1.36519	1.66674	1.13041	1.21205
			total LPE						130.29	121.212	95.396	195.707	284.827	84.8607	241.388	257.449	110.134	250.333	276.253	93.564	185.944	125.904	1	0.930326	2.05152	2.98574	2.84451	3.03378	2.27298	2.50833	1.98734	1.34565
lipid0792	monoacyl polar lipids	LPI, non-oxidized	LPI 16:0		-0.6327			0.46203	64.285	41.6187	26.2475	32.4711	61.7486	24.4696	30.2906	38.1952	25.4765	37.013	32.8546	22.8919	61.5778	29.8435	1	0.647409	1.23711	2.35255	1.23789	1.56092	1.45283	1.2896	2.68994	1.30367
lipid0794	monoacyl polar lipids	LPI, non-oxidized	LPI 18:2		-0.48419				53.7276	37.675	25.3297	33.2203	59.0181	21.5737	45.5422	46.1921	28.5503	40.4372	36.9046	22.9655	29.4045	30.1554	1	0.701222	1.31152	2.33	2.11101	2.14113	1.41635	1.29262	1.28038	1.31307
lipid0793	monoacyl polar lipids	LPI, non-oxidized	LPI 18:3		-0.65561	-0.64093		-0.75135	77.905	112.421	43.1493	54.4267	161.6	47.4359	61.1632	113.245	52.4445	76.151	85.4862	53.4509	46.1868	105.143	1	1.44305	1.26136	3.74514	1.28939	2.38732	1.45203	1.63003	0.864098	1.9671
			total LPI						195.918	191.714	94.7265	120.118	282.367	93.4792	136.996	197.632	106.471	153.601	155.245	99.3082	137.169	165.142	1	0.978545	1.26805	2.98087	1.46552	2.11418	1.44265	1.4581	1.38125	1.66293
lipid0796	monoacyl polar lipids	LPS, non-oxidized	LPS 16:0**						6.04591	4.90852	3.83264	4.60712	6.25444	3.43335	3.70915	5.46211	4.29161	5.37275	7.01066	3.30949	4.59488	4.97646	1	0.811875	1.20207	1.63189	1.08033	1.5909	1.25192	1.63358	1.3884	1.50369
lipid0798	monoacyl polar lipids	LPS, non-oxidized	LPS 18:2**				-0.35266		5.88525	9.43906	3.59686	5.29299	6.53498	3.46457	4.24039	7.52841	4.7331	3.54627	10.5278	3.29624	4.27689	7.78591	1	1.60385	1.47156	1.81686	1.22393	2.17297	0.749249	2.22429	1.29751	2.36206
lipid0797	monoacyl polar lipids	LPS, non-oxidized	LPS 18:3**				-0.36415		5.85172	5.17958	3.31501	4.48229	6.17666	3.06299	3.92082	5.1662	4.56994	3.13605	6.64289	3.18455	3.78006	4.56651	1	0.885139	1.35212	1.86324	1.28006	1.68665	0.686233	1.45361	1.187	1.43396
			total LPS						17.7829	19.5272	10.7445	14.3824	18.9661	9.96091	11.8704	18.1567	13.5946	12.0551	24.1813	9.79028	12.6518	17.3289	1	1.09809	1.33858	1.76519	1.19169	1.8228	0.886751	1.77874	1.29229	1.77001
			total monoacyl polar lipids						12704.9	11589.1	8314.38	11514.7	13820.8	7800.24	9450.12	12627.4	8461.02	7042.94	10966.6	6815.07	10341.2	7809.72	1	0.912178	1.38491	1.66228	1.21152	1.61885	0.832399	1.29614	1.51739	1.14595
lipid0283	neutral glycerolipids	DG, non-oxidized	DG 16:0_18:3*	-0.37323		-0.40772		0.77272	11.3569	16.5996	10.4308	15.0741	20.1915	10.3747	15.3411	17.626	10.4152	20.0371	13.2587	10.9733	46.2378	13.0869	1	1.46163	1.44514	1.93575	1.4787	1.69894	1.92383	1.27301	4.21365	1.19261
lipid0282	neutral glycerolipids	DG, non-oxidized	DG 16:1_18:3**	-0.33925			0.35742	0.76165	0.52054	0.94374	0.494775	1.00153	1.21196	0.39489	1.33444	1.10406	0.591956	1.67122	0.986169	0.411406	4.39586	0.783085	1	1.813	2.02421	2.44952	3.37928	2.79588	2.82322	1.66595	10.685	1.90343
lipid0285	neutral glycerolipids	DG, non-oxidized	DG 18:2_18:3*	-0.4453		-0.55769		0.78095	7.53503	12.1295	7.27981	11.4887	14.696	6.66619	10.9592	14.145	6.92822	12.5603	10.5356	6.55675	18.514	8.93726	1	1.60975	1.57816	2.01873	1.64399	2.12191	1.81293	1.52068	2.82365	1.36306
lipid0281	neutral glycerolipids	DG, non-oxidized	DG 18:3_16:3**	-0.33168			0.3972	0.63423	0.851729	1.37954	0.910715	24.1231	21.2239	0.668608	16.3056	8.97504	0.767004	10.8233	5.09772	0.718491	12.3576	2.50436	1	1.61969	26.488	23.3047	24.3875	13.4235	14.1112	6.64627	17.1994	3.48558
lipid0286	neutral glycerolipids	DG, non-oxidized	DG 18:3_18:1**	-0.51686		-0.53092		0.61699	3.10172	5.32231	2.97378	3.38555	4.31741	2.56857	3.123	4.47378	3.02721	3.73929	3.66691	2.31683	5.3799	3.54603	1	1.71592	1.13846	1.45183	1.21585	1.74174	1.23523	1.21132	2.32209	1.53055
lipid0284	neutral glycerolipids	DG, non-oxidized	DG 18:3_18:3*	-0.36062			0.37255	0.60335	6.64684	10.4839	6.35641	20.3349	21.1424	5.48864	15.6429	14.3274	4.81168	18.0296	11.288	5.26115	21.4207	8.80499	1	1.57728	3.19912	3.32615	2.85006	2.61038	3.74705	2.34595	4.07149	1.67359
			total DG						30.0128	46.8586	28.4463	75.4078	82.7832	26.1616	62.7063	60.6514	26.5413	66.861	44.8331	26.238	108.306	37.6626	1	1.56129	2.65088	2.91015	2.39688	2.31833	2.51913	1.68918	4.12783	1.43543
lipid0280	neutral glycerolipids	TG, non-oxidized	TG 18:2_36:5	-0.38378	-0.48663	-0.66178	-0.53725		24.9508	32.9851	38.0624	27.8546	54.7763	23.5027	31.7889	77.7204	20.3807	75.6237	136.08	20.8995	58.9802	81.3712	1	1.32201	0.731815	1.43912	1.35256	3.30686	3.71055	6.67691	2.82209	3.89345
lipid0276	neutral glycerolipids	TG, non-oxidized	TG 18:3_34:2*	-0.49936	-0.44602	-0.661			9.86829	21.5183	12.3607	18.8925	38.6234	12.4304	16.8892	31.478	7.56186	50.5838	42.9044	7.83173	36.3467	26.8141	1	2.18055	1.52843	3.1247	1.3587	2.53234	6.68933	5.67378	4.64095	3.42377
lipid0278	neutral glycerolipids	TG, non-oxidized	TG 18:3_36:5		-0.43254	-0.66332	-0.37031		43.0223	56.1452	67.4023	51.9735	80.9554	39.9687	44.0307	99.6238	26.5669	128.449	187.595	31.6682	104.166	129.215	1	1.30502	0.771095	1.20108	1.10163	2.49255	4.83492	7.06121	3.28929	4.08029
lipid0277	neutral glycerolipids	TG, non-oxidized	TG 18:3_36:6		-0.4136	-0.67387			41.9223	59.9568	70.5131	63.5657	89.6631	41.8398	43.0535	79.8303	18.3623	151.727	159.036	25.0967	128.879	121.102	1	1.43019	0.901473	1.27158	1.02901	1.908	8.26298	8.66102	5.13527	4.82539
			total TG						119.764	170.605	188.338	162.286	264.018	117.742	135.762	288.653	72.8718	406.383	525.615	85.4962	328.372	358.502	1	1.42452	0.861674	1.40183	1.15305	2.45158	5.57669	7.21288	3.84077	4.1932
			total neutral glycerolipids						149.776	217.464	216.785	237.694	346.801	143.903	198.469	349.304	99.4131	473.244	570.448	111.734	436.677	396.165	1	1.45192	1.09645	1.59975	1.37918	2.42735	4.76038	5.73816	3.90818	3.5456
lipid0255	sterol derivatives	Acyl sterol hexoside, non-oxidized	Campesterol-Hex 16:0					0.64736	1471.98	992.581	1053.58	1667.83	1611.56	975.95	2592.04	2434.25	975.371	3479.41	2704.71	921.992	3292.74	1439.74	1	0.674317	1.58301	1.5296	2.65591	2.49424	3.56727	2.773	3.57133	1.56155
lipid0261	sterol derivatives	Acyl sterol hexoside, non-oxidized	Campesterol-Hex 18:2					0.66358	962.75	848.027	751.107	1216.77	1350.82	680.862	1396.59	1273.18	758.623	1399.51	1159.63	687.2	1205.49	663.726	1	0.880838	1.61997	1.79844	2.05121	1.86995	1.84481	1.5286	1.7542	0.965842
lipid0258	sterol derivatives	Acyl sterol hexoside, non-oxidized	Campesterol-Hex 18:3					0.7184	1089.26	895.076	764.44	1356.74	1445.03	669.993	2950.08	1949.91	743.311	3422.45	2088.42	707.25	3426.6	1218.19	1	0.821729	1.77481	1.89031	4.40315	2.91034	4.60433	2.80962	4.84497	1.72243
lipid0257	sterol derivatives	Acyl sterol hexoside, non-oxidized	Sitosterol-Hex 16:0		0.37143			0.6677	8608.37	4186.05	5711.35	9551.44	7738.74	4739.71	15617.9	14655.1	5018.54	19837.2	14353.1	4605.9	18821.5	7422.06	1	0.486277	1.67236	1.35498	3.29511	3.09198	3.95279	2.86002	4.0864	1.61142
lipid0263	sterol derivatives	Acyl sterol hexoside, non-oxidized	Sitosterol-Hex 18:2					0.73771	5790.94	3925.71	4222.44	7147.89	6555.45	3486.17	7858.23	6640.45	4106.88	8006.07	5890.97	3522.14	7238.83	3402.7	1	0.677905	1.69283	1.55253	2.25412	1.9048	1.94943	1.43441	2.05524	0.966089
lipid0260	sterol derivatives	Acyl sterol hexoside, non-oxidized	Sitosterol-Hex 18:3		0.46799		0.33922	0.75598	6210.36	3585.88	3876.39	7640.74	6276.87	3143.42	17299.8	10389.4	3648.6	19734.4	10703	3379.71	20996	5870.01	1	0.577403	1.9711	1.61926	5.50349	3.30512	5.40877	2.93346	6.21236	1.73684
lipid0256	sterol derivatives	Acyl sterol hexoside, non-oxidized	Stigmasterol-Hex 16:0					0.50759	989.252	642.744	647.876	947.232	989.967	516.348	943.164	1107.22	463.633	1722.85	1215.53	419.583	1206.9	688.629	1	0.649726	1.46206	1.52802	1.8266	2.14432	3.71597	2.62175	2.87643	1.64123
lipid0262	sterol derivatives	Acyl sterol hexoside, non-oxidized	Stigmasterol-Hex 18:2				0.34034	0.36165	607.843	437.854	435.804	684.344	674.278	342.543	578.918	586.806	374.26	689.431	518.721	329.033	476.758	360.603	1	0.720341	1.5703	1.5472	1.69006	1.71309	1.84212	1.38599	1.44897	1.09595
lipid0259	sterol derivatives	Acyl sterol hexoside, non-oxidized	Stigmasterol-Hex 18:3				0.39076	0.64968	807.419	578.432	505.325	854.786	889.445	380.706	1289.16	953.514	395.393	1880.03	1038.22	359.994	1368.93	632.944	1	0.716396	1.69156	1.76014	3.38624	2.50459	4.75485	2.62579	3.80264	1.75821
			total non-oxidized acyl sterol hexosides						26538.2	16092.4	17968.3	31067.8	27532.2	14935.7	50525.9	39989.8	16484.6	60171.4	39672.4	14932.8	58033.8	21698.6	1	0.606385	1.72903	1.53226	3.38289	2.67746	3.65016	2.40663	3.88633	1.45308
lipid0816	sterol derivatives	Acyl sterol hexoside, oxidized	Campesterol-Hex 18:4;O		-0.5013	-0.574	-0.34202	0.38121	147.602	78.8193	43.0214	45.7904	109.641	35.4102	49.544	92.8195	43.9256	66.882	82.2655	29.1291	73.8552	64.7505	1	0.534	1.06436	2.54853	1.39914	2.62126	1.52262	1.87284	2.53544	2.22288
lipid0818	sterol derivatives	Acyl sterol hexoside, oxidized	Sitosterol-Hex 18:4;O			-0.39768		0.68623	94.9935	90.6724	59.6665	97.2602	142.142	64.5752	144.806	167.955	82.1596	229.805	206.419	52.826	256.413	143.175	1	0.954511	1.63007	2.38228	2.24244	2.60092	2.79706	2.51242	4.85391	2.71031
lipid0817	sterol derivatives	Acyl sterol hexoside, oxidized	Stigmasterol-Hex 18:4;O		-0.36196	-0.69215		0.50553	46.8706	48.263	30.9332	39.8103	69.1626	28.287	32.8856	59.9027	34.7514	60.9818	63.0269	24.56	60.5889	47.7483	1	1.02971	1.28698	2.23587	1.16257	2.11768	1.7548	1.81365	2.46697	1.94415
			total oxidized acyl sterol hexosides						289.466	217.755	133.621	182.861	320.946	128.272	227.236	320.677	160.837	357.669	351.712	106.515	390.857	255.674	1	0.752264	1.3685	2.40191	1.77151	2.49997	2.2238	2.18677	3.6695	2.40035
lipid0819	sterol derivatives	Sterol ester, non-oxidized	Campesterol 18:2**	-0.36885	-0.57739	-0.35058	0.42465		1.77891	3.05926	2.19097	2.33694	4.22035	1.74564	1.95628	2.90284	1.60304	2.48142	1.6288	1.97174	1.60427	1.41207	1	1.71974	1.06662	1.92625	1.12066	1.6629	1.54795	1.01607	0.813634	0.716157
lipid0287	sterol derivatives	Sterol ester, non-oxidized	Campesterol 18:3**	-0.36705	-0.63697	-0.44556	0.38448		2.7333	4.35189	2.14499	3.16167	5.63391	2.32138	2.44913	3.68662	2.21935	3.07784	1.95361	2.69118	2.1196	2.10059	1	1.59217	1.47398	2.62654	1.05503	1.58812	1.38682	0.880259	0.78761	0.780546
lipid0821	sterol derivatives	Sterol ester, non-oxidized	Sitosterol 18:2*	-0.4381	-0.41574		0.39636	0.47362	9.05417	15.6219	8.20353	11.6169	16.9247	9.15351	10.1024	12.1217	8.11589	11.0595	5.80076	10.0667	9.29314	5.67413	1	1.72538	1.41609	2.06311	1.10367	1.32427	1.3627	0.714741	0.923159	0.563654
lipid0289	sterol derivatives	Sterol ester, non-oxidized	Sitosterol 18:3*		-0.39404		0.47003		13.7909	18.6086	10.662	15.7349	22.6332	11.7525	11.567	14.8492	10.3175	15.1152	7.0911	13.0252	11.5855	7.77764	1	1.34933	1.47579	2.12278	0.98422	1.2635	1.46501	0.687291	0.889471	0.597123
lipid0820	sterol derivatives	Sterol ester, non-oxidized	Stigmasterol 18:2**				0.36162		1.53179	1.89715	1.5161	1.79623	2.21467	1.32293	1.67321	1.9051	1.50852	1.86184	1.31909	1.59012	1.3877	1.31163	1	1.23852	1.18477	1.46077	1.26478	1.44006	1.23421	0.874427	0.872704	0.824866
lipid0288	sterol derivatives	Sterol ester, non-oxidized	Stigmasterol 18:3**		-0.4155	-0.3722		-0.41501	1.59594	2.06556	1.4891	1.63831	2.37353	1.27851	1.11829	1.63609	1.23573	1.94518	1.0819	1.44168	1.19613	1.21615	1	1.29426	1.1002	1.59394	0.874681	1.27969	1.57412	0.875518	0.829679	0.843567
			total non-oxidized sterol esters						30.4851	45.6043	26.2067	36.285	54.0004	27.5745	28.8664	37.1016	25	35.541	18.8753	30.7866	27.1864	19.4922	1	1.49596	1.38457	2.06055	1.04685	1.3455	1.42164	0.755011	0.883059	0.63314
lipid0825	sterol derivatives	Sterol ester, oxidized	Campesterol 18:4;O**		-0.50821	-0.39516		0.42428	0.308535	0.258499	0.14214	0.176055	0.373374	0.122548	0.20998	0.330342	0.205505	0.207619	0.325902	0.166786	0.218924	0.220987	1	0.837828	1.23861	2.62681	1.71346	2.69562	1.01028	1.58585	1.3126	1.32497
lipid0827	sterol derivatives	Sterol ester, oxidized	Sitosterol 18:4;O**			-0.44977		0.68117	0.239603	0.217056	0.134664	0.18465	0.312676	0.132498	0.181802	0.329473	0.16682	0.216993	0.275596	0.141805	0.31027	0.175235	1	0.9059	1.37119	2.3219	1.37211	2.48662	1.30076	1.65206	2.18801	1.23575
lipid0826	sterol derivatives	Sterol ester, oxidized	Stigmasterol 18:4;O**		-0.47872	-0.5642	-0.37594		0.281762	0.279616	0.127287	0.136502	0.333337	0.0899953	0.152339	0.34787	0.142011	0.167362	0.28127	0.0997181	0.18115	0.22542	1	0.992386	1.07239	2.61878	1.69275	3.86542	1.17851	1.98062	1.81662	2.26057
			total oxidized sterol esters						0.829899	0.755172	0.404091	0.497207	1.01939	0.345041	0.544121	1.00769	0.514336	0.591974	0.882767	0.408309	0.710345	0.621642	1	0.909955	1.23043	2.52267	1.57697	2.92048	1.15095	1.71632	1.73972	1.52248
lipid0248	sterol derivatives	Sterol hexoside, non-oxidized	Campesterol-Hex			-0.49704			1295.95	949.419	1108.92	1086.39	1131.94	843.002	1105.74	1479.72	979.163	1328.22	1504.28	957.9	710.802	717.125	1	0.732607	0.979691	1.02077	1.31167	1.7553	1.35648	1.53629	0.742041	0.748643
lipid0250	sterol derivatives	Sterol hexoside, non-oxidized	Sitosterol-Hex	0.33282		-0.42394			9595.5	5019.28	7400.92	7741.64	6582.67	5318.09	7227.49	9553.47	6634.74	8423.9	9148.55	6075.76	4559.9	4442.86	1	0.523087	1.04604	0.88944	1.35904	1.79641	1.26967	1.37889	0.750507	0.731243
lipid0249	sterol derivatives	Sterol hexoside, non-oxidized	Stigmasterol-Hex			-0.52638		-0.43912	1461.7	704.337	1034.68	917.937	1038.57	689.891	605.489	971.699	727.597	861.321	995.642	689.59	559.065	622.272	1	0.481863	0.887172	1.00376	0.877659	1.40848	1.18379	1.3684	0.810721	0.902379
			total sterol hexosides						12353.1	6673.03	9544.51	9745.97	8753.18	6850.98	8938.73	12004.9	8341.5	10613.4	11648.5	7723.25	5829.76	5782.25	1	0.540189	1.02111	0.91709	1.30474	1.75229	1.27237	1.39645	0.754833	0.748682
			total sterol derivatives						39212.1	23029.5	27673.1	41033.4	36661.3	21942.9	59721.2	52353.5	25012.5	71178.7	51692.3	22793.8	64282.3	27756.6	1	0.587306	1.48279	1.3248	2.72167	2.3859	2.84573	2.06666	2.82017	1.21773
			total lipid signal						1.24474e+06	1.17089e+06	1.21702e+06	1.17321e+06	1.12577e+06	1.09487e+06	758154	990837	1.31196e+06	712773	858473	1.19811e+06	552678	996349	1	0.940675	0.964	0.925022	0.692458	0.904978	0.54329	0.654346	0.461293	0.831603

## Sheet: Table S6
Table S6. Limit of detection (LOD) and coefficient of variation (CoV, standard deviation/average) for the lipids analyzed and reported. LOD and CoV are determined on quality control (QC) samples, which are identical samples made from a sample pool, run every third or fourth sample throughout the analysis, and used for normalization of the lipid data. Lipids with CoV > 0.20, after trending and nor…
Lipid number	Lipid name	QC average lipid level	Less than LOD = 0.25 on QC average (indicated by "x")	Less than LOD = 0.75 on QC average (indicated by "x")	CoV of uncorrected QC samples	CoV of QC samples, after trending	CoV of QC samples, after trending and normalization
lipid0599	DGDG-O(FA 18:4;O) 34:6	0.787281			0.728234	0.738362	0.117539
lipid0600	DGDG-O(FA 18:4;O) 34:7;O	0.858386			0.650473	0.656813	0.0951212
lipid0601	DGDG-O(FA 18:4;O) 36:6 or DGDG-O(FA 18:4;O) 34:8;O2	2.63801			0.669161	0.679375	0.106742
lipid0603	DGDG-O(FA 18:4;O) 36:8;O2	1.0378			0.592242	0.598447	0.0895788
lipid0473	MGDG-O(FA 16:0) 34:6	57.9841			0.457726	0.46257	0.0667501
lipid0474	MGDG-O(FA 16:0) 34:7;O	10.22			0.50588	0.510407	0.0667261
lipid0476	MGDG-O(FA 16:0) 36:6 or MGDG-O(FA 16:0) 34:8;O2	60.8534			0.496414	0.497541	0.0476477
lipid0483	MGDG-O(FA 16:0) 36:8;O2	6.08684			0.50181	0.507845	0.0796181
lipid0464	MGDG-O(FA 16:1) 34:6	7.03493			0.586064	0.590686	0.0737013
lipid0468	MGDG-O(FA 16:1) 36:6 or MGDG-O(FA 16:1) 34:8;O2	7.27629			0.517465	0.52211	0.0685198
lipid0459	MGDG-O(FA 16:2) 34:6	7.20127			0.440007	0.445712	0.07021
lipid0461	MGDG-O(FA 16:2) 36:6 or MGDG-O(FA 16:2) 34:8;O2	30.1366			0.536662	0.537965	0.0496138
lipid0448	MGDG-O(FA 16:3) 34:6	183.063			0.555509	0.55996	0.0701167
lipid0454	MGDG-O(FA 16:3) 36:6 or MGDG-O(FA 16:3) 34:8;O2	72.8447			0.545735	0.546251	0.0445138
lipid0519	MGDG-O(FA 16:3;O2) 34:6 or MGDG-O(FA 18:1) 34:6	9.63633			0.492022	0.495352	0.0598083
lipid0522	MGDG-O(FA 16:3;O2) 36:6 or MGDG-O(FA 16:3;O2) 34:8;O2 or MGDG-O(FA 18:1) 36:6 or MGDG-O(FA 18:1) 34:8;O2	18.8013			0.511317	0.513218	0.05272
lipid0525	MGDG-O(FA 16:3;O2) 36:8;O2 or MGDG-O(FA 18:1) 36:8;O2	2.59378			0.591321	0.598168	0.0912983
lipid0496	MGDG-O(FA 16:3;O) 34:6	2.30433			0.652817	0.66117	0.0983739
lipid0498	MGDG-O(FA 16:3;O) 34:8;O2 or MGDG-O(FA 16:3;O) 36:6	4.09652			0.513457	0.523609	0.0966003
lipid0500	MGDG-O(FA 16:3;O) 36:8;O2	1.5999			0.700216	0.711475	0.1348
lipid0487	MGDG-O(FA 16:4;O) 34:7;O	2.60405			0.637422	0.645257	0.0959811
lipid0489	MGDG-O(FA 16:4;O) 34:8;O2 or MGDG-O(FA 16:4;O) 36:6	10.5553			0.499256	0.503658	0.069543
lipid0495	MGDG-O(FA 16:4;O) 36:8;O2	1.91976			0.632031	0.643656	0.121781
lipid0526	MGDG-O(FA 18:0) 34:6	6.4482			0.544321	0.549674	0.0728888
lipid0527	MGDG-O(FA 18:0) 34:7;O	2.4841			0.625345	0.632353	0.0900542
lipid0528	MGDG-O(FA 18:0) 34:8;O2 or MGDG-O(FA 18:0) 36:6	6.00826			0.506481	0.512922	0.0776769
lipid0514	MGDG-O(FA 18:2) 34:6	36.4473			0.442478	0.445211	0.0542527
lipid0515	MGDG-O(FA 18:2) 34:7;O	6.78292			0.526414	0.531864	0.0746616
lipid0516	MGDG-O(FA 18:2) 36:6 or MGDG-O(FA 18:2) 34:8;O2	37.0291			0.4893	0.491634	0.0549316
lipid0518	MGDG-O(FA 18:2) 36:8;O2	3.89937			0.547657	0.558629	0.103343
lipid0583	MGDG-O(FA 18:2;O2) 36:6 or MGDG-O(FA 18:2;O2) 34:8;O2	43.403			0.883225	0.904821	0.136276
lipid0596	MGDG-O(FA 18:2;O3) 36:6 or MGDG-O(FA 18:2;O3) 34:8;O2	7.34098			0.565103	0.572372	0.0821571
lipid0551	MGDG-O(FA 18:2;O) 36:6 or MGDG-O(FA 18:2;O) 34:8;O2	22.7242			0.475554	0.478173	0.0566828
lipid0553	MGDG-O(FA 18:2;O) 36:8;O2	6.51701			0.526474	0.531494	0.0726156
lipid0501	MGDG-O(FA 18:3) 34:6	432.057			0.462087	0.463623	0.0480096
lipid0506	MGDG-O(FA 18:3) 34:7;O2 or MGDG-O(FA 18:3) 36:5	65.3601			0.498992	0.500105	0.0466897
lipid0503	MGDG-O(FA 18:3) 34:7;O	56.5931			0.485702	0.487037	0.0490532
lipid0505	MGDG-O(FA 18:3) 36:6 or MGDG-O(FA 18:3) 34:8;O2	340.669			0.491444	0.492426	0.0471299
lipid0508	MGDG-O(FA 18:3) 36:7;O	12.955			0.490161	0.492872	0.056389
lipid0512	MGDG-O(FA 18:3) 36:8;O2	23.0908			0.547244	0.548171	0.0503577
lipid0566	MGDG-O(FA 18:3;O2) 34:6	3.80225			0.538395	0.544139	0.0762598
lipid0570	MGDG-O(FA 18:3;O2) 36:6 or MGDG-O(FA 18:3;O2) 34:8;O2	27.6698			0.543761	0.545931	0.0537418
lipid0580	MGDG-O(FA 18:3;O2) 36:8;O2	2.92222			0.548886	0.554475	0.0791306
lipid0591	MGDG-O(FA 18:3;O3) 34:6	2.16998			0.729686	0.731969	0.0735944
lipid0592	MGDG-O(FA 18:3;O3) 34:7;O	1.7284			0.677482	0.681262	0.0763782
lipid0593	MGDG-O(FA 18:3;O3) 36:6 or MGDG-O(FA 18:3;O3) 34:8;O2	16.3277			0.679861	0.695535	0.106263
lipid0595	MGDG-O(FA 18:3;O3) 36:8;O2	1.23648			0.629699	0.639062	0.112471
lipid0542	MGDG-O(FA 18:3;O) 34:6	3.85222			0.683704	0.684966	0.0563027
lipid0543	MGDG-O(FA 18:3;O) 34:7;O	2.31129			0.642812	0.650026	0.0893049
lipid0544	MGDG-O(FA 18:3;O) 36:6 or MGDG-O(FA 18:3;O) 34:8;O2	11.4525			0.518579	0.523266	0.071191
lipid0546	MGDG-O(FA 18:3;O) 36:6;O	5.04775			0.639103	0.64511	0.091076
lipid0545	MGDG-O(FA 18:3;O) 36:7;O	2.88344			0.670546	0.692337	0.13788
lipid0548	MGDG-O(FA 18:3;O) 36:8;O2	1.61774			0.607497	0.630911	0.169816
lipid0559	MGDG-O(FA 18:4;O2) 34:6	3.10728			0.584305	0.588941	0.0743626
lipid0560	MGDG-O(FA 18:4;O2) 34:7;O	1.66208			0.655777	0.659536	0.0737144
lipid0561	MGDG-O(FA 18:4;O2) 36:6 or MGDG-O(FA 18:4;O2) 34:8;O2	5.76678			0.526152	0.533247	0.0827703
lipid0565	MGDG-O(FA 18:4;O2) 36:8;O2	1.23825			0.604742	0.615599	0.108539
lipid0586	MGDG-O(FA 18:4;O3) 34:6	1.2951			0.701017	0.705958	0.0880998
lipid0587	MGDG-O(FA 18:4;O3) 34:7;O	1.85486			0.658263	0.661457	0.0702375
lipid0588	MGDG-O(FA 18:4;O3) 36:6 or MGDG-O(FA 18:4;O3) 34:8;O2	6.1098			0.644327	0.649781	0.0846536
lipid0532	MGDG-O(FA 18:4;O) 34:6	1.82028			0.619176	0.628169	0.093148
lipid0533	MGDG-O(FA 18:4;O) 34:7;O	6.48057			0.503812	0.50904	0.0702086
lipid0535	MGDG-O(FA 18:4;O) 34:8;O2 (Arabidopside E or MGDG-O(FA 18:4;O) 36:6)	93.6814			0.54176	0.543373	0.0550902
lipid0538	MGDG-O(FA 18:4;O) 36:6;O or MGDG-O(FA 18:4;O) 34:8;O3	3.98408			0.648077	0.651734	0.0727234
lipid0575	MGDG-O(FA 18:4;O) 36:7;O2 (alternative fragmentation)	2.27214			0.506369	0.517358	0.100443
lipid0537	MGDG-O(FA 18:4;O) 36:7;O	3.42648			0.525947	0.53182	0.0791227
lipid0574	MGDG-O(FA 18:4;O) 36:8;O2 (alternative fragmentation; Arabidopside G)	14.1139			0.614392	0.617339	0.0699318
lipid0540	MGDG-O(FA 18:4;O) 36:8;O2 (Arabidopside G)	12.3723			0.505885	0.509387	0.0667081
lipid0541	MGDG-O(FA 18:4;O) 38:4 or MGDG-O(FA 18:4;O) 36:6;O2	1.82729			0.665294	0.66918	0.0767229
lipid0556	MGDG-O(FA 18:5;O2) 36:6 or MGDG-O(FA 18:5;O2) 34:8;O2	5.57765			0.583221	0.5878	0.0750297
lipid0558	MGDG-O(FA 18:5;O2) 36:8;O2	1.41954			0.671671	0.682909	0.118239
lipid0293	PG-O(FA 16:1) 36:8;O2**	0.221072	x	x	0.305613	0.326052	0.0997598
lipid0283	DG 16:0_18:3*	0.456667		x	0.219208	0.220807	0.0451052
lipid0282	DG 16:1_18:3**	0.0267974	x	x	0.159554	0.17658	0.0737269
lipid0285	DG 18:2_18:3*	0.302078		x	0.204486	0.207237	0.0490114
lipid0281	DG 18:3_16:3**	0.186255	x	x	0.166677	0.170029	0.0358487
lipid0286	DG 18:3_18:1**	0.10949	x	x	0.170479	0.176141	0.0444424
lipid0284	DG 18:3_18:3*	0.309915		x	0.205423	0.206935	0.0444364
lipid0395	DGDG 16:0_18:3;O2*	0.457026		x	0.312491	0.323537	0.0827704
lipid0632	DGDG 16:0_18:3;O*	0.369353		x	0.383227	0.396053	0.0978017
lipid0392	DGDG 16:0_18:4;O*	0.41268		x	0.411288	0.421931	0.086552
lipid0639	DGDG 16:0_18:5;O2	2.02865			0.39486	0.417943	0.156659
lipid0336	DGDG 18:3_16:4;O*	0.312163		x	0.185839	0.216826	0.102694
lipid0354	DGDG 18:3_18:5;O2	2.27949			0.213499	0.223006	0.068126
lipid0394	DGDG 18:3;O2_16:3*	0.274797		x	0.341579	0.357026	0.091607
lipid0400	DGDG 18:3;O2_18:3 or DGDG 18:4;O_18:2;O**	0.203092	x	x	0.268075	0.306201	0.140266
lipid0423	DGDG 18:3;O3_18:3*	0.380699		x	0.268014	0.28095	0.0879299
lipid0348	DGDG 18:3;O4_16:4;O*	0.274843		x	0.517926	0.531093	0.100037
lipid0339	DGDG 18:3;O_16:4;O**	0.222137	x	x	0.383127	0.407132	0.114854
lipid0634	DGDG 18:3;O_18:3*	0.514686		x	0.162582	0.183323	0.0806385
lipid0387	DGDG 18:4;O_16:3*	0.324778		x	0.499894	0.526683	0.123009
lipid0390	DGDG 18:4;O_16:3;O*	0.287405		x	0.646729	0.667508	0.150934
lipid0338	DGDG 18:4;O_16:4;O (16:4;O as fragment; Arabidopside C)	0.892673			0.294838	0.308399	0.0913479
lipid0389	DGDG 18:4;O_16:4;O (18:4;O as fragment; Arabidopside C)	2.7586			0.247466	0.251898	0.0483649
lipid0396	DGDG 18:4;O_18:3	0.89302			0.128889	0.138566	0.0534614
lipid0399	DGDG 18:4;O_18:3;O**	0.219562	x	x	0.351244	0.375815	0.116382
lipid0402	DGDG 18:4;O_18:4;O2 or DGDG 18:4;O_20:2*	0.399196		x	0.227379	0.24636	0.0835694
lipid0398	DGDG 18:4;O_18:4;O (Arabidopside D)*	0.480301		x	0.157376	0.170927	0.0659043
lipid0341	DGDG 18:5;O2_16:4;O*	0.363288		x	0.356914	0.380818	0.121539
lipid0164	DGDG 34:3	583.955			0.308592	0.308424	0.0187728
lipid0163	DGDG 34:4	28.5426			0.34415	0.344716	0.0278736
lipid0162	DGDG 34:5	57.8793			0.355704	0.356198	0.0275854
lipid0161	DGDG 34:6	257.273			0.349507	0.349686	0.0248094
lipid0170	DGDG 36:3	41.3511			0.316411	0.316234	0.0200881
lipid0169	DGDG 36:4	67.4751			0.346443	0.346554	0.0244006
lipid0168	DGDG 36:5	151.097			0.376467	0.37634	0.0236416
lipid0167	DGDG 36:6	2947.48			0.354016	0.353903	0.0221624
lipid0175	DGDG 38:4 or DGDG 36:6;O2	2.72222			0.440722	0.442919	0.046959
lipid0174	DGDG 38:5 or DGDG 36:7;O2	6.69942			0.40796	0.409043	0.0407096
lipid0173	DGDG 38:6 or DGDG 36:8;O2	24.8171			0.353681	0.353891	0.0261873
lipid0157	DGMG 16:0	4.30224			0.396767	0.399902	0.0537341
lipid0156	DGMG 16:3	2.63893			0.353868	0.361738	0.0773923
lipid0158	DGMG 16:4;O	1.81935			0.413954	0.420801	0.0726754
lipid0159	DGMG 18:3	13.439			0.461501	0.4625	0.0397373
lipid0160	DGMG 18:4;O	1.34518			0.552114	0.558027	0.0778025
lipid0209	GIPC 42:1;O3	0.835294			0.637347	0.663702	0.183364
lipid0210	GIPC 42:1;O4	2.06334			0.540031	0.55888	0.138245
lipid0212	GIPC 42:2;O4	1.80638			0.591375	0.608084	0.140835
lipid0226	Hex-Cer 34:1;O3	203.35			0.436892	0.437468	0.034875
lipid0227	Hex-Cer 34:1;O4	231.806			0.438723	0.439186	0.0345127
lipid0233	Hex-Cer 40:1;O4	153.357			0.429903	0.430581	0.0361744
lipid0237	Hex-Cer 42:2;O4	714.229			0.44186	0.442154	0.0329815
lipid0800	LPA 18:3	6.05358			0.288548	0.29375	0.103801
lipid0025	LPC 16:0	1.1535			0.268025	0.276647	0.0545056
lipid0029	LPC 18:0**	0.15368	x	x	0.669431	0.824609	0.113778
lipid0028	LPC 18:1*	0.37481		x	0.275958	0.280071	0.0602434
lipid0027	LPC 18:2	2.0615			0.201846	0.202025	0.0175602
lipid0026	LPC 18:3	1.94217			0.0936068	0.0950213	0.0190382
lipid0052	LPE 16:0	2.07141			0.10773	0.111442	0.030724
lipid0055	LPE 18:1*	0.611595		x	0.224389	0.248776	0.102968
lipid0054	LPE 18:2	2.09188			0.119832	0.122789	0.0292555
lipid0053	LPE 18:3	1.42081			0.143233	0.151344	0.0461854
lipid0001	LPG 16:1	96.1804			0.217629	0.233479	0.0933506
lipid0005	LPG 18:1	19.74			0.276171	0.302608	0.143775
lipid0004	LPG 18:2	39.8834			0.274595	0.289131	0.10526
lipid0006	LPG 18:4;O	39.4764			0.265264	0.300932	0.175251
lipid0792	LPI 16:0	1.10786			0.474999	0.487173	0.103452
lipid0794	LPI 18:2	1.2872			0.32083	0.326433	0.0547017
lipid0793	LPI 18:3	2.51265			0.315929	0.319673	0.0454562
lipid0796	LPS 16:0**	0.173196	x	x	0.356648	0.374794	0.115165
lipid0798	LPS 18:2**	0.181327	x	x	0.257607	0.271579	0.089138
lipid0797	LPS 18:3**	0.172497	x	x	0.273954	0.288952	0.0969445
lipid0424	MGDG 18:2;O3_18:3	1.31242			0.299979	0.308416	0.0688782
lipid0435	MGDG 18:2;O_16:3*	0.463314		x	0.246696	0.292033	0.146597
lipid0437	MGDG 18:2;O_18:3*	0.615993		x	0.169182	0.186903	0.0756405
lipid0327	MGDG 18:3_16:3;O2*	0.307712		x	0.284173	0.322664	0.13656
lipid0637	MGDG 18:3_16:3;O*	0.603791		x	0.189167	0.22475	0.120135
lipid0323	MGDG 18:3_16:4;O	1.82704			0.102598	0.112451	0.0437775
lipid0838	MGDG 18:3_7:1;O2*	0.272895		x	0.557332	0.571161	0.113643
lipid0837	MGDG 18:3_7:1;O*	0.402294		x	0.574128	0.589772	0.0975958
lipid0836	MGDG 18:3_9:1;O2*	0.388928		x	0.488656	0.510786	0.136313
lipid0370	MGDG 18:3;O2_16:3*	0.60217		x	0.250761	0.28557	0.12468
lipid0374	MGDG 18:3;O2_16:4;O (18:4;O as fragment)*	0.317562		x	0.400715	0.451991	0.173688
lipid0330	MGDG 18:3;O2_16:4;O or MGDG 20:1_16:4;O (16:4;O as fragment)**	0.245268	x	x	0.758941	0.778921	0.138644
lipid0383	MGDG 18:3;O2_18:3;O**	0.204869	x	x	0.609618	0.635746	0.186856
lipid0318	MGDG 18:3;O3_16:3**	0.23198	x	x	0.263366	0.291993	0.118961
lipid0419	MGDG 18:3;O3_18:3*	0.531974		x	0.322382	0.335135	0.0944608
lipid0623	MGDG 18:3;O_16:3*	0.540092		x	0.194367	0.236206	0.128692
lipid0625	MGDG 18:3;O_16:4;O*	0.403399		x	0.297132	0.314996	0.0963952
lipid0626	MGDG 18:3;O_18:3	1.12282			0.169384	0.187883	0.0791119
lipid0609	MGDG 18:4;O2_16:3*	0.353163		x	0.480966	0.494929	0.0988733
lipid0329	MGDG 18:4;O2_16:4;O or MGDG 20:2_16:4;O**	0.160516	x	x	0.740863	0.761889	0.142781
lipid0611	MGDG 18:4;O2_18:3**	0.241399	x	x	0.487906	0.508409	0.119476
lipid0317	MGDG 18:4;O3_16:3**	0.248647	x	x	0.342377	0.361632	0.0955666
lipid0358	MGDG 18:4;O_16:3	3.23232			0.255091	0.259354	0.0499696
lipid0362	MGDG 18:4;O_16:3;O*	0.639327		x	0.255831	0.285713	0.120306
lipid0325	MGDG 18:4;O_16:4;O (16:4;O as fragment; Arabidopside A)	0.988739			0.199056	0.217997	0.0856177
lipid0361	MGDG 18:4;O_16:4;O (18:4;O as fragment; Arabidopside A)	1.67068			0.223243	0.233337	0.0670908
lipid0366	MGDG 18:4;O_18:1 or MGDG 18:4;O_16:3;O2*	0.499654		x	0.402164	0.414471	0.0899024
lipid0372	MGDG 18:4;O_18:3	1.23639			0.166591	0.185848	0.0829567
lipid0382	MGDG 18:4;O_18:3;O2 or MGDG 18:4;O_20:3*	0.28049		x	0.59933	0.616101	0.120775
lipid0385	MGDG 18:4;O_18:3;O3**	0.210843	x	x	0.48148	0.501316	0.119661
lipid0386	MGDG 18:4;O_18:3;O4**	0.218948	x	x	0.604688	0.627044	0.149875
lipid0376	MGDG 18:4;O_18:3;O*	0.395673		x	0.380568	0.394204	0.0952878
lipid0381	MGDG 18:4;O_18:4;O2**	0.211183	x	x	0.665435	0.687402	0.1419
lipid0384	MGDG 18:4;O_18:4;O3 or MGDG 18:4;O_19:3;O2**	0.211882	x	x	0.507032	0.534577	0.135639
lipid0375	MGDG 18:4;O_18:4;O (Arabidopside B)*	0.703092		x	0.231069	0.258038	0.103367
lipid0833	MGDG 18:4;O_9:1;O	2.00576			0.755571	0.762231	0.0852284
lipid0316	MGDG 18:5;O2_16:3*	0.403758		x	0.210027	0.228381	0.0837413
lipid0328	MGDG 18:5;O2_16:4;O or MGDG 20:3_16:4;O**	0.182497	x	x	0.563457	0.588725	0.138351
lipid0380	MGDG 18:5;O2_18:4;O or MGDG 20:3_18:4;O*	0.274856		x	0.523503	0.539884	0.135308
lipid0139	MGDG 30:5;O2	15.6402			0.411864	0.42074	0.0748876
lipid0137	MGDG 30:6;O2	16.7984			0.498454	0.501512	0.0541954
lipid0138	MGDG 30:6;O	5.37603			0.767258	0.774366	0.106811
lipid0143	MGDG 34:3	299.445			0.402801	0.403006	0.0289702
lipid0142	MGDG 34:4	603.504			0.418058	0.418765	0.0340474
lipid0141	MGDG 34:5	1173.7			0.451961	0.452613	0.035449
lipid0140	MGDG 34:6	20107.4			0.44405	0.444463	0.0328902
lipid0808	MGDG 35:3	8.3331			0.447373	0.451882	0.0605793
lipid0149	MGDG 36:3	37.4481			0.407681	0.409059	0.0396528
lipid0148	MGDG 36:4 or MGDG 34:6;O2	256.687			0.47431	0.474524	0.0334036
lipid0147	MGDG 36:5 or MGDG 34:7;O2	851.932			0.404999	0.405161	0.0291342
lipid0146	MGDG 36:6 or MGDG 34:8;O2	7938.95			0.414022	0.414138	0.0288278
lipid0154	MGDG 38:4 or MGDG 36:6;O2	12.5962			0.496197	0.499803	0.0589638
lipid0153	MGDG 38:5 or MGDG 36:7;O2	13.5688			0.483246	0.488871	0.0736554
lipid0152	MGDG 38:6 or MGDG 36:8;O2	25.898			0.488579	0.492114	0.0622768
lipid0834	MGDG 9:1;O2_16:3*	0.613444		x	0.650984	0.671379	0.135606
lipid0831	MGDG 9:1;O_16:3*	0.686431		x	0.682202	0.703311	0.136469
lipid0133	MGMG 16:0	11.8175			0.732238	0.740651	0.121791
lipid0132	MGMG 16:3	23.4424			0.69679	0.700223	0.0679963
lipid0134	MGMG 16:4;O	26.2023			0.64865	0.650536	0.0569846
lipid0135	MGMG 18:3	21.0671			0.665322	0.667264	0.0572092
lipid0136	MGMG 18:4;O	13.3967			0.748715	0.753042	0.0787035
lipid0126	PA 34:1	1.6579			0.13033	0.159784	0.0996143
lipid0125	PA 34:2	13.0359			0.141016	0.167925	0.101527
lipid0124	PA 34:3	10.6186			0.110185	0.14345	0.105231
lipid0123	PA 34:4	2.84995			0.156025	0.18579	0.116102
lipid0122	PA 34:5*	0.259693		x	0.195043	0.2188	0.101817
lipid0121	PA 34:6	0.874856			0.127419	0.174686	0.145124
lipid0131	PA 36:2	0.969137			0.223001	0.2436	0.131212
lipid0130	PA 36:3	2.69117			0.104017	0.140174	0.103281
lipid0129	PA 36:4	9.27882			0.112747	0.144752	0.100825
lipid0128	PA 36:5	10.9117			0.111092	0.144608	0.106342
lipid0127	PA 36:6	4.2365			0.138292	0.170268	0.145001
lipid0436	PC 16:0_18:2;O*	0.748294		x	0.255762	0.283432	0.11884
lipid0371	PC 16:0_18:3;O2*	0.722007		x	0.2748	0.294367	0.10772
lipid0624	PC 16:0_18:3;O	1.00512			0.282413	0.304172	0.105145
lipid0610	PC 16:0_18:4;O2**	0.231752	x	x	0.494995	0.511145	0.116056
lipid0379	PC 18:2_18:3;O2*	0.452614		x	0.212523	0.226645	0.0735335
lipid0628	PC 18:2_18:3;O*	0.588301		x	0.217753	0.233619	0.078084
lipid0439	PC 18:2;O_18:2*	0.589974		x	0.20088	0.235355	0.115404
lipid0438	PC 18:2;O_18:3*	0.65951		x	0.194945	0.224506	0.10705
lipid0378	PC 18:3_18:3;O2*	0.423216		x	0.227576	0.243097	0.0787295
lipid0627	PC 18:3_18:3;O*	0.671196		x	0.239358	0.265249	0.104251
lipid0421	PC 18:3;O3_18:2*	0.450196		x	0.315739	0.332131	0.104464
lipid0420	PC 18:3;O3_18:3*	0.496327		x	0.323155	0.336263	0.0871969
lipid0613	PC 18:4;O2_18:2**	0.173451	x	x	0.533973	0.560165	0.14028
lipid0030	PC 32:0**	0.177771	x	x	0.634228	0.8564	0.168963
lipid0841	PC 32:1	1.67184			0.0600913	0.0657083	0.0264207
lipid0840	PC 32:3	1.68029			0.0619802	0.0635834	0.0154543
lipid0035	PC 34:1	23.3346			0.16833	0.16934	0.163387
lipid0034	PC 34:2	153.835			0.0568291	0.0592166	0.0174931
lipid0033	PC 34:3	153.833			0.0549965	0.0565788	0.0142699
lipid0032	PC 34:4	4.78813			0.112708	0.114865	0.0278773
lipid0842	PC 34:6	3.20456			0.0597705	0.0604578	0.0107138
lipid0040	PC 36:2	19.3965			0.0621981	0.0652409	0.0203162
lipid0039	PC 36:3	51.704			0.0586112	0.062596	0.0224188
lipid0038	PC 36:4	143.028			0.0546789	0.0584658	0.0209178
lipid0037	PC 36:5	183.987			0.0539888	0.0566763	0.01768
lipid0036	PC 36:6	92.0183			0.0523829	0.0547865	0.0167163
lipid0046	PC 38:2	1.97386			0.142224	0.144582	0.0271735
lipid0045	PC 38:3	2.93725			0.0827359	0.0854523	0.0221265
lipid0044	PC 38:4	3.20412			0.0619312	0.0659091	0.0223229
lipid0043	PC 38:5	2.11722			0.0516069	0.0558373	0.0210153
lipid0042	PC 38:6	0.847719			0.104229	0.106227	0.0249279
lipid0050	PC 40:2*	0.312824		x	0.250221	0.255033	0.049451
lipid0049	PC 40:3*	0.537647		x	0.344762	0.350678	0.0614039
lipid0048	PC 40:4*	0.59998		x	0.396594	0.403338	0.069695
lipid0047	PC 40:5*	0.33585		x	0.359459	0.366621	0.0697576
lipid0427	PE 16:0_18:2;O	0.885739			0.283724	0.301885	0.100616
lipid0355	PE 16:0_18:3;O2*	0.665222		x	0.290722	0.313666	0.108726
lipid0413	PE 16:0_18:3;O3	1.76216			0.287437	0.296046	0.0741167
lipid0618	PE 16:0_18:3;O	1.17288			0.216562	0.2264	0.0619351
lipid0604	PE 16:0_18:4;O2*	0.382163		x	0.49975	0.514325	0.11074
lipid0349	PE 16:0;O_18:2	1.3794			0.162981	0.169967	0.0520537
lipid0428	PE 18:1;O2_16:0*	0.535418		x	0.32298	0.353212	0.13608
lipid0434	PE 18:1;O2_18:2*	0.585686		x	0.321075	0.349664	0.13712
lipid0433	PE 18:1;O2_18:3*	0.640536		x	0.329678	0.355908	0.12634
lipid0360	PE 18:2_18:3;O2*	0.561092		x	0.330783	0.342422	0.0798231
lipid0415	PE 18:2_18:3;O3	1.75875			0.254312	0.259148	0.0506016
lipid0620	PE 18:2_18:3;O	0.947183			0.22682	0.237272	0.0650141
lipid0430	PE 18:2;O_18:2	0.867059			0.265423	0.287074	0.104142
lipid0429	PE 18:2;O_18:3	0.863876			0.294109	0.314789	0.110033
lipid0359	PE 18:3_18:3;O2*	0.566229		x	0.361167	0.370525	0.0759623
lipid0414	PE 18:3_18:3;O3	1.16516			0.241736	0.248967	0.0598961
lipid0619	PE 18:3_18:3;O*	0.720922		x	0.283393	0.305943	0.110011
lipid0606	PE 18:4;O2_18:2*	0.367261		x	0.508865	0.52443	0.112549
lipid0605	PE 18:4;O2_18:3*	0.419523		x	0.46953	0.481973	0.103444
lipid0060	PE 32:0*	0.308771		x	0.146974	0.156032	0.0505391
lipid0059	PE 32:1	0.820431			0.138681	0.14162	0.0292744
lipid0057	PE 32:3	1.04014			0.130501	0.13192	0.0215462
lipid0063	PE 34:2	147.548			0.145137	0.14585	0.0176551
lipid0062	PE 34:3	106.921			0.140502	0.141081	0.0164608
lipid0061	PE 34:4	1.69808			0.14385	0.145366	0.0227434
lipid0069	PE 36:2	8.15228			0.154521	0.1554	0.0210057
lipid0068	PE 36:3	19.8275			0.171645	0.172428	0.032328
lipid0067	PE 36:4	75.977			0.148615	0.149344	0.0178841
lipid0066	PE 36:5	90.2443			0.149717	0.150377	0.0174373
lipid0065	PE 36:6	33.6255			0.161586	0.162172	0.0207364
lipid0807	PE 38:2	1.90105			0.144684	0.14548	0.0190223
lipid0074	PE 38:3	1.95704			0.154152	0.15504	0.020067
lipid0073	PE 38:4	1.75476			0.145107	0.14677	0.0233138
lipid0072	PE 38:5	1.6949			0.159554	0.161227	0.0241767
lipid0076	PE 40:2	3.79567			0.145189	0.145867	0.0178327
lipid0075	PE 40:3	1.91995			0.157545	0.158239	0.01932
lipid0079	PE 42:2	4.54303			0.152297	0.152784	0.017458
lipid1003	PE 42:3 (measured in negative mode)	3.26579			0.427252	0.434852	0.0683694
lipid0078	PE 42:3 (measured in positive mode)	6.1892			0.153449	0.153841	0.0164969
lipid0353	PG 18:2_16:0;O	1.38252			0.242092	0.254003	0.0736375
lipid0432	PG 18:2;O_16:0*	0.669608		x	0.259763	0.274429	0.0801836
lipid0431	PG 18:2;O_16:1*	0.637222		x	0.3267	0.353162	0.120587
lipid0417	PG 18:3;O3_16:0*	0.558065		x	0.400473	0.411738	0.10777
lipid0622	PG 18:3;O_16:0	0.790386			0.246175	0.25508	0.0650456
lipid0621	PG 18:3;O_16:1	0.993686			0.343435	0.356881	0.0908704
lipid0357	PG 18:4;O_16:0	0.816477			0.303574	0.315525	0.0698858
lipid0356	PG 18:4;O_16:1	1.73052			0.214202	0.226723	0.0680658
lipid0364	PG 18:4;O_18:2*	0.393725		x	0.429742	0.441808	0.0925172
lipid0363	PG 18:4;O_18:3*	0.559876		x	0.247822	0.261552	0.0767861
lipid0008	PG 32:0	13.6972			0.0868667	0.123104	0.069003
lipid0007	PG 32:1	14.8528			0.0958348	0.106794	0.0459239
lipid0012	PG 34:1	68.1466			0.106338	0.108495	0.0242349
lipid0011	PG 34:2	129.322			0.134819	0.136221	0.0253929
lipid0023	PG 34:2;O*	0.480882		x	0.270162	0.28501	0.0933106
lipid0010	PG 34:3	256.111			0.0800897	0.0827183	0.0221906
lipid0022	PG 34:3;O	1.10295			0.134644	0.151059	0.0680004
lipid0009	PG 34:4	405.006			0.104567	0.107048	0.0246626
lipid0021	PG 34:4;O	0.820033			0.168774	0.185911	0.0784817
lipid0020	PG 34:5;O*	0.708837		x	0.161863	0.184882	0.0902338
lipid0018	PG 36:2	1.86608			0.206311	0.278406	0.140166
lipid0017	PG 36:3	2.91272			0.148257	0.159423	0.058755
lipid0016	PG 36:4	4.35105			0.111558	0.117717	0.0379933
lipid0015	PG 36:5	4.47058			0.111719	0.117806	0.0380609
lipid0014	PG 36:6	5.30793			0.0936947	0.0995962	0.034675
lipid0086	PI 34:2	112.516			0.0986245	0.100933	0.0230973
lipid1001	PI 34:3 (measured in negative mode)	80.8917			0.294762	0.295488	0.0249116
lipid0085	PI 34:3 (measured in positive mode)	124.298			0.101294	0.10354	0.0228166
lipid0095	PS 34:3	3.63822			0.0978685	0.105897	0.0407477
lipid0116	PS 42:2	3.12772			0.140985	0.146826	0.0407088
lipid0115	PS 42:3	4.25154			0.12401	0.131591	0.0428534
lipid0819	Campesterol 18:2**	0.0979542	x	x	0.307187	0.470493	0.122954
lipid0287	Campesterol 18:3**	0.124065	x	x	0.236911	0.244433	0.0592893
lipid0825	Campesterol 18:4;O**	0.00777778	x	x	0.30412	0.331048	0.156414
lipid0248	Campesterol-Hex	39.2009			0.509865	0.511036	0.044825
lipid0255	Campesterol-Hex 16:0	59.1585			0.519271	0.520512	0.0450218
lipid0261	Campesterol-Hex 18:2	36.8743			0.548974	0.55065	0.0493636
lipid0258	Campesterol-Hex 18:3	53.2945			0.574349	0.575723	0.0495908
lipid0816	Campesterol-Hex 18:4;O	1.87554			0.665461	0.680233	0.140218
lipid0821	Sitosterol 18:2*	0.473281		x	0.286832	0.288986	0.0509091
lipid0289	Sitosterol 18:3*	0.553307		x	0.280489	0.281877	0.0458822
lipid0827	Sitosterol 18:4;O**	0.00773856	x	x	0.197635	0.228141	0.126409
lipid0250	Sitosterol-Hex	243.747			0.524974	0.525151	0.0346184
lipid0257	Sitosterol-Hex 16:0	313.651			0.526459	0.527317	0.0407645
lipid0263	Sitosterol-Hex 18:2	193.703			0.549111	0.550227	0.0446169
lipid0260	Sitosterol-Hex 18:3	278.444			0.562564	0.563716	0.0455485
lipid0818	Sitosterol-Hex 18:4;O	4.0515			0.642697	0.654936	0.109507
lipid0820	Stigmasterol 18:2**	0.0752614	x	x	0.318301	0.322053	0.0570642
lipid0288	Stigmasterol 18:3**	0.0640784	x	x	0.23265	0.236315	0.0455709
lipid0826	Stigmasterol 18:4;O**	0.00650327	x	x	0.30608	0.324115	0.139689
lipid0249	Stigmasterol-Hex	27.8865			0.441351	0.443283	0.0482046
lipid0256	Stigmasterol-Hex 16:0	26.4094			0.506405	0.508064	0.0475121
lipid0262	Stigmasterol-Hex 18:2	18.0072			0.544451	0.546557	0.0532387
lipid0259	Stigmasterol-Hex 18:3	26.4993			0.542325	0.544104	0.0505283
lipid0817	Stigmasterol-Hex 18:4;O	1.42425			0.628422	0.644546	0.126259
lipid0182	SQDG 32:0	1.88014			0.388807	0.393043	0.052152
lipid0186	SQDG 34:3	55.1566			0.353984	0.355358	0.0340089
lipid0189	SQDG 36:6	14.6763			0.348096	0.350146	0.0384259
lipid0177	SQMG 16:0	0.912118			0.416958	0.424164	0.0897531
lipid0178	SQMG 18:3	0.855281			0.342106	0.352047	0.0835601
lipid0280	TG 18:2_36:5	1.50429			0.0599235	0.0695168	0.0331325
lipid0276	TG 18:3_34:2*	0.607882		x	0.0749961	0.0825621	0.033201
lipid0278	TG 18:3_36:5	2.18039			0.0729535	0.075642	0.0215942
lipid0277	TG 18:3_36:6	1.90299			0.0748923	0.0780608	0.0244777
lipid0305	TeGDG 34:6	9.87958			0.606657	0.608602	0.0606202
lipid0309	TeGDG 36:6	3.02729			0.622689	0.626188	0.071423
lipid0294	TrGDG 34:6	60.0088			0.498011	0.499668	0.0518001
lipid0298	TrGDG 36:6	21.1203			0.520389	0.522752	0.0569036

## Sheet: Table S7
Table S7. Arabidopsis lines used. Abbreviations: ppla, patatin-like phospholipaseA; lox, lipoxygenase; opr, oxophytodienoic acid reductase. All lines are homozygous for each T-DNA insertion. All mutations are in a Columbia-0 background, and lines A and M are wild-type Col-0. Nomenclature for ppla lines is given in Chen et al. [41].
Letter label	Genes altered	T-DNA insertion line(s)	Mutant name
A	None	None	wild-type
B	At1g61850	Salk_087152	pplaI
C	At1g61850, At2g26560	Salk_087153 x Salk_059119	pplaI x pplaIIα
D	At1g61850, At3g54950	Salk_087152 x Salk_057212	pplaI x pplaIIIβ
E	At4g37070	Salk_039679	pplaIIε
F	At2g26560	Salk_059119	pplaIIα
G	At2g26560, At3g54950	Salk_059120 x Salk_057212	pplaIIα x pplaIIIβ
H	At4g37050	Salk_142351	pplaIIγ
I	At4g37060	Salk_090933	pplaIIδ
J	At4g37060, At3g54950	Salk_090934 x Salk_057212	pplaIIδ x pplaIIIβ
K	At2g39220	Salk_040363	pplaIIIα
L	At3g54950	Salk_057212	pplaIIIβ
M	None	None	wild-type
N	At3g54950, At4g29800, At3g63200	Salk_057212 x Salk_088404 x Salk_029470	pplaIIIβ x pplaIIIγ x pplaIIIδ
O	At3g54950, At3g63200	Salk_057212 x Salk_029471	pplaIIIβ x pplaIIIδ
P	At4g29800	Salk_088404	pplaIIIγ
Q	At3g63200	Salk_029470	pplaIIIδ
R	At1g55020	Salk_059431	lox1
S	At5g43590	Salk_080154	pplaIIβ
T	At1g55020, At3g22400	Salk_059431 x Salk_044826	lox1 x lox5
U	At1g72520	Salk_138527	lox4
V	At3g22400	Salk_044826	lox5
W	At1g67560	Salk_138907	lox6
X	At2g06050	Not a T-DNA insertion. See Supplemental methods.	opr3-2

## Sheet: Table S8
Table S8. Rosette lipid amounts from the freezing time course of plants of all genotypes. Experimental protocol is shown in Figure 1. Lipid levels are reported as normalized mass spectral signal, as described by Vu et al. [14], and a value of 1 represents a signal equal to 1 pmol of internal standard per dry mass of rosette tissue (mg). The data for WT plants are the same data shown in Table S1.
											DGDG-O(FA 18:4;O) 34:6	DGDG-O(FA 18:4;O) 34:7;O	DGDG-O(FA 18:4;O) 36:6 or DGDG-O(FA 18:4;O) 34:8;O2	DGDG-O(FA 18:4;O) 36:8;O2	MGDG-O(FA 16:0) 34:6	MGDG-O(FA 16:0) 34:7;O	MGDG-O(FA 16:0) 36:6 or MGDG-O(FA 16:0) 34:8;O2	MGDG-O(FA 16:0) 36:8;O2	MGDG-O(FA 16:1) 34:6	MGDG-O(FA 16:1) 36:6 or MGDG-O(FA 16:1) 34:8;O2	MGDG-O(FA 16:2) 34:6	MGDG-O(FA 16:2) 36:6 or MGDG-O(FA 16:2) 34:8;O2	MGDG-O(FA 16:3) 34:6	MGDG-O(FA 16:3) 36:6 or MGDG-O(FA 16:3) 34:8;O2	MGDG-O(FA 16:3;O2) 34:6 or MGDG-O(FA 18:1) 34:6	MGDG-O(FA 16:3;O2) 36:6 or MGDG-O(FA 16:3;O2) 34:8;O2 or MGDG-O(FA 18:1) 36:6 or MGDG-O(FA 18:1) 34:8;O2	MGDG-O(FA 16:3;O2) 36:8;O2 or MGDG-O(FA 18:1) 36:8;O2	MGDG-O(FA 16:3;O) 34:6	MGDG-O(FA 16:3;O) 34:8;O2 or MGDG-O(FA 16:3;O) 36:6	MGDG-O(FA 16:3;O) 36:8;O2	MGDG-O(FA 16:4;O) 34:7;O	MGDG-O(FA 16:4;O) 34:8;O2 or MGDG-O(FA 16:4;O) 36:6	MGDG-O(FA 16:4;O) 36:8;O2	MGDG-O(FA 18:0) 34:6	MGDG-O(FA 18:0) 34:7;O	MGDG-O(FA 18:0) 34:8;O2 or MGDG-O(FA 18:0) 36:6	MGDG-O(FA 18:2) 34:6	MGDG-O(FA 18:2) 34:7;O	MGDG-O(FA 18:2) 36:6 or MGDG-O(FA 18:2) 34:8;O2	MGDG-O(FA 18:2) 36:8;O2	MGDG-O(FA 18:2;O2) 36:6 or MGDG-O(FA 18:2;O2) 34:8;O2	MGDG-O(FA 18:2;O3) 36:6 or MGDG-O(FA 18:2;O3) 34:8;O2	MGDG-O(FA 18:2;O) 36:6 or MGDG-O(FA 18:2;O) 34:8;O2	MGDG-O(FA 18:2;O) 36:8;O2	MGDG-O(FA 18:3) 34:6	MGDG-O(FA 18:3) 34:7;O2 or MGDG-O(FA 18:3) 36:5	MGDG-O(FA 18:3) 34:7;O	MGDG-O(FA 18:3) 36:6 or MGDG-O(FA 18:3) 34:8;O2	MGDG-O(FA 18:3) 36:7;O
Sample name	Block	Tray	Plant position	Genotype letter	Genotype name	Time (h)	Vol analyzed (uL) (contains 0.04 mg DW)	Comments on samples flagged for having analytical problems	Dry weight (g)	Ion leakage (%)	lipid0599	lipid0600	lipid0601	lipid0603	lipid0473	lipid0474	lipid0476	lipid0483	lipid0464	lipid0468	lipid0459	lipid0461	lipid0448	lipid0454	lipid0519	lipid0522	lipid0525	lipid0496	lipid0498	lipid0500	lipid0487	lipid0489	lipid0495	lipid0526	lipid0527	lipid0528	lipid0514	lipid0515	lipid0516	lipid0518	lipid0583	lipid0596	lipid0551	lipid0553	lipid0501	lipid0506	lipid0503	lipid0505	lipid0508
F1.01.01	1	1	1	H	pPLA.IIgamma	0	86		0.007416	2.97671	15.5268	12.3525	23.5764	7.39779	34.0486	40.3765	109.469	42.9151	56.9575	70.0135	34.2946	270.704	41.1964	64.6872	35.2368	128.818	26.7019	48.7854	55.9998	32.7426	38.0742	62.1734	15.3288	28.4199	33.587	43.8033	26.8796	27.5545	69.3227	39.6757	546.249	93.6586	173.539	71.103	48.6423	71.2191	22.6003	68.9445	35.4494
F1.01.02	1	1	2	V	lox5.1	0	247		0.00259	5.09173	27.7719	11.0455	25.7634	5.73016	34.2064	46.2272	119.097	49.2286	60.9698	78.0488	37.6809	248.213	39.5936	61.1349	36.4442	143.567	28.0464	51.27	69.3509	29.6235	37.1325	75.3852	24.6377	27.4954	39.1073	40.446	19.6706	28.2658	57.5709	32.7512	456.543	97.2217	228.19	73.1227	35.7626	63.6738	23.707	52.6832	32.2877
F1.01.03	1	1	3	K	pPLA.IIIalpha	0	S7		0.004022	4.26113	20.4036	16.3834	29.098	11.1689	40.3741	48.5135	113.779	47.403	67.154	79.4488	38.8504	242.759	42.1571	65.8373	43.3346	146.398	33.7382	61.6292	64.8899	35.9653	42.5004	87.9832	15.5293	27.5508	42.6997	48.8099	27.7243	34.3446	68.2075	44.0598	469.746	105.731	206.342	80.0614	31.1332	68.4077	23.4472	59.5476	28.0783
F1.01.04	1	1	4	G	pPLA.IIalphaxpPLA.IIIbeta	0	97		0.006588	2.98222	15.7199	12.7174	24.1135	7.61255	32.227	43.8241	117.499	42.0282	59.2506	77.328	29.1251	248.238	30.8488	58.0904	38.016	144.716	36.1569	46.3179	58.0488	34.3411	28.2096	77.7522	19.5714	30.3077	37.1965	40.4738	18.2835	33.1072	63.1579	44.4404	887.209	136.672	203.902	61.6243	24.7768	67.843	17.1939	47.7601	29.181
F1.01.05	1	1	5	I	pPLA.IIdelta	0	109		0.00585	4.34783	15.5497	13.8333	29.8623	7.36436	37.3883	43.5833	108.237	47.4143	56.6947	80.729	31.4264	274.784	34.9494	63.6669	32.7352	131.98	26.6671	51.7682	69.422	39.6467	38.5864	86.9123	20.178	31.4634	37.6829	59.3349	26.142	26.9632	84.1337	31.028	577.584	113.698	200.802	74.0954	30.3188	67.6243	19.4572	52.6155	34.4943
F1.01.06	1	1	6	T	lox1.1xlox5.1	0	136		0.004698	2.85644	14.294	14.3042	20.9824	7.28319	32.4063	46.6415	104.212	44.7226	60.658	69.783	34.891	243.254	41.1138	55.6112	35.2597	127.717	27.3349	50.4615	62.4066	30.0596	41.1102	59.7598	20.9099	27.5466	34.9746	51.9396	15.4575	32.0413	80.5402	31.683	507.229	88.9943	210.441	64.8321	23.2371	55.9901	16.4638	36.5151	27.1122
F1.01.07	1	1	7	Q	pPLA.IIIdelta	0	117		0.005484	2.82046	18.8754	12.2523	25.7027	7.38637	34.5787	44.5782	105.998	50.6027	60.9245	74.9538	36.3629	254.664	31.8323	55.7844	35.4162	138.568	27.2992	57.756	63.0523	30.9999	36.0418	68.3104	17.2615	29.4519	35.2992	50.3708	14.8285	29.3641	55.2465	42.6853	459.716	85.0312	218.477	62.7084	38.1336	65.6134	21.9037	48.54	37.1493
F1.01.08	1	1	8	C	pPLA.IxpPLA.IIalpha	0	104		0.006178	2.48541	14.8722	12.0085	26.0714	7.44251	37.5764	39.3731	120.547	42.3736	55.3781	73.882	34.5437	239.635	31.5663	57.1465	34.355	141.968	30.3736	49.8562	60.2115	34.4669	31.6441	76.8562	29.1193	32.557	37.9544	38.9061	16.8014	27.9491	57.0641	39.2904	478.109	83.1649	229.974	61.2582	26.7584	65.9633	16.679	43.6315	28.0287
F1.01.09	1	1	9	A	WT	0	98		0.006502	2.29994	14.2675	11.5844	20.3516	5.3933	29.524	37.3421	103.094	36.0134	43.5963	72.8871	25.8594	225.044	29.3394	49.0405	33.5234	109.726	24.1657	41.841	48.0064	21.9718	29.7822	47.2778	15.2112	25.9342	30.8738	45.6697	20.3594	26.5397	63.1623	27.3801	421.325	68.759	180.045	54.5744	21.5853	52.2029	14.1532	33.0785	26.264
F1.01.10	1	1	10	W	lox6	0	105		0.006122	NA	14.0376	11.6976	16.7188	5.11154	35.2317	37.358	91.8884	42.2616	48.872	67.3879	27.04	229.269	31.1497	51.6863	25.7287	110.12	21.7976	42.5547	58.5735	30.4655	39.7081	56.7843	19.6714	26.3339	31.3248	45.5627	13.131	27.5111	64.3702	36.2708	456.31	70.3448	215.173	55.2201	25.6075	49.3019	13.7595	36.0721	28.5136
F1.01.11	1	1	11	X	opr3	0	118		0.005436	2.6082	14.1691	10.8883	16.6571	5.88421	26.4859	35.0532	66.9193	37.4743	50.7946	56.2571	29.9803	230.327	31.221	46.4988	40.9755	111.578	28.9929	46.3495	42.4206	31.2821	30.9547	64.4783	16.1511	29.0322	30.6063	43.0513	19.5454	29.324	63.1813	28.8751	335.146	75.8759	194.256	62.3781	34.0129	50.9441	16.5104	47.7331	27.1316
F1.01.12	1	1	12	P	pPLA.IIIgamma	0	114		0.005636	2.18208	12.2355	11.3264	15.9597	6.22113	29.6407	33.2421	98.7859	44.5836	53.7045	61.9111	26.3618	222.77	24.7347	47.6612	21.8379	106.13	27.2517	44.0047	53.2758	25.9998	32.7955	48.2544	9.71725	20.2903	27.9893	49.6948	14.1717	25.1716	54.4775	28.3684	395.216	76.8794	195.371	58.0938	23.3303	63.8514	12.8984	28.6077	23.2353
F1.01.13	1	1	13	W	lox6	0	92		0.006976	2.99504	14.7112	9.92027	20.7355	6.22427	32.9642	34.5278	86.4159	41.8484	53.5711	66.5165	28.8113	257.378	30.7218	50.6573	33.9982	114.484	24.3531	46.7733	49.2593	23.4665	36.2011	91.3425	11.8666	23.1656	30.7468	43.421	20.444	25.1054	69.2234	33.9264	313.537	69.2819	158.684	64.2816	31.6488	72.9307	17.7471	43.2119	23.2717
F1.01.14	1	1	14	P	pPLA.IIIgamma	0	106		0.006038	2.81115	11.9919	10.4879	23.213	6.74	33.095	40.566	99.4434	35.587	50.3682	62.8186	27.3345	226.98	27.5463	47.5373	35.039	128.846	21.9964	38.6957	52.7117	23.0899	30.1723	60.6597	16.4203	27.8932	24.5694	39.6747	16.7922	24.2897	66.363	33.5813	364.295	73.7134	202.378	56.1521	29.5854	64.4031	17.3675	41.9249	23.1134
F1.01.15	1	1	15	H	pPLA.IIgamma	0	113		0.005674	2.68388	13.0868	9.55003	17.7918	7.97282	34.8727	36.5886	94.8307	46.3092	52.9399	70.6516	26.9757	212.65	34.0551	52.7868	27.5584	133.892	26.5415	46.9675	60.5116	28.4778	31.3997	48.4151	27.1001	29.5625	34.6454	42.4676	20.8267	29.8581	69.7037	37.9061	448.094	81.1131	176.896	56.9068	33.4682	66.6261	18.0034	54.6312	35.6213
F1.01.16	1	1	16	O	pPLA.IIIbetaxpPLA.IIIdelta	0	132		0.004834	2.89823	16.1357	12.0739	24.923	7.53887	35.3087	45.3207	112.075	51.6184	62.7201	76.1941	32.2123	280.878	31.5626	66.3167	46.5327	159.254	23.1608	45.5954	56.3197	27.4176	31.7468	90.9932	21.654	31.0886	37.5238	51.6575	22.3619	27.2463	74.6446	55.191	644.534	107.651	263.952	63.4939	32.8415	69.6845	20.2278	58.1374	37.5423
F1.01.17	1	1	17	J	pPLA.IIdeltaxpPLA.IIIbeta	0	102		0.006296	3.56912	15.8125	10.1878	25.4947	7.87502	33.7313	40.6789	100.019	40.3689	55.9934	72.6387	32.1979	250.873	30.113	61.182	32.6986	108.22	27.3668	45.2344	52.6133	29.4039	25.2385	74.157	21.1107	28.5024	34.3106	37.4042	19.4033	25.3385	88.079	51.9823	531.995	84.5497	204.961	65.9898	23.4064	65.4929	17.816	50.7526	29.8981
F1.01.18	1	1	18	P	pPLA.IIIgamma	0	117		0.005474	2.16745	14.0942	10.7132	19.9224	5.75996	29.5294	37.1608	95.9427	38.0267	50.433	64.2606	27.9213	211.038	28.3146	50.7998	31.9914	116.613	25.8014	41.8665	41.3565	27.228	31.8403	54.6713	12.2913	29.7053	27.7444	34.3846	17.2318	26.9407	54.8544	39.2605	417.864	79.9372	201.129	61.7011	24.1719	57.332	18.1921	40.8656	26.8242
F1.01.19	1	1	19	U	lox4	0	146		0.004348	4.24802	20.3223	11.9881	29.1302	9.69936	35.6716	46.5956	124.497	53.4761	66.7838	87.4046	34.1404	271.695	33.3514	63.9007	38.1357	123.703	32.9492	44.388	85.3737	31.591	41.3646	102.624	17.7657	30.1104	36.7044	50.2261	20.8162	31.9195	84.1901	45.7384	681.956	124.91	217.001	78.1709	26.7612	82.5231	22.4882	54.9609	35.9159
F1.01.20	1	1	20	L	pPLA.IIIbeta	0	117		0.005468	2.76336	20.2962	11.9919	30.5477	8.34254	35.2153	44.1699	109.414	46.025	59.6556	58.0168	33.4162	247.963	28.6235	63.5431	41.6222	145.173	26.668	46.3265	54.4055	29.4874	36.2895	84.415	21.9583	31.7634	36.5366	56.3909	28.3717	33.102	61.9511	42.9132	446.749	86.0826	225.544	67.2436	27.0863	63.9755	20.2961	42.7346	36.2196
F1.01.21	1	1	21	O	pPLA.IIIbetaxpPLA.IIIdelta	0	135		0.004736	3.69583	22.047	12.4482	34.2427	9.604	41.1206	51.3992	132.861	47.0437	67.5754	82.3117	36.0682	259.892	33.6685	66.3065	38.5791	136.212	26.3998	49.8299	58.0257	33.8346	30.8638	105.057	24.6507	30.9993	42.2541	63.2802	25.3247	30.4156	72.7587	42.6433	442.32	107.206	204.08	77.9964	30.1595	68.9684	22.2196	68.1584	42.1025
F1.01.22	1	1	22	M	WT	0	127		0.00502	3.68458	13.0128	9.90651	27.8788	7.95716	29.4888	42.9052	131.565	45.1278	42.4319	71.2967	27.9264	236.307	37.2844	53.8807	29.0607	130.634	21.6635	30.3841	57.3683	21.5607	30.3804	73.2307	19.652	21.0401	27.6428	41.4455	15.3593	24.3321	69.7095	36.9101	596.604	103.489	235.233	54.9026	27.9127	63.0161	18.3614	53.1578	30.4826
F1.01.23	1	1	23	A	WT	0	100		0.006414	2.04227	13.1055	10.3735	30.9508	9.30614	29.2988	39.853	177.138	53.0647	50.2054	74.0831	28.6005	239.122	37.0853	57.2647	30.4097	122.477	24.3912	36.074	56.9753	25.6959	27.3405	95.106	15.6989	29.2503	24.0433	46.8286	16.1046	23.7551	81.7106	35.3786	807.626	116.273	184.721	63.4033	37.9435	74.2552	16.1015	67.9478	29.0197
F1.01.24	1	1	24	D	pPLA.IxpPLA.IIIbeta	0	110		0.005842	2.29761	14.7924	10.6265	32.1302	5.99567	38.3817	40.1128	135.237	38.7577	60.7022	90.3937	31.4786	265.601	35.6103	64.1841	37.2428	147.631	31.0097	42.2394	56.7703	30.6957	36.5529	76.9807	28.4667	32.3683	33.6976	63.8662	16.5271	33.8878	77.5215	44.3178	1019.08	129.131	229.629	67.8186	29.2616	75.4868	24.5674	49.0479	35.2397
F1.01.25	1	1	25	V	lox5.1	0	129		0.004972	3.17056	12.3161	14.3652	29.9408	8.68698	31.2978	33.636	34.478	22.062	48.9688	52.6345	27.1461	218.654	35.6467	58.9494	23.3493	139.75	25.1578	44.344	47.109	36.3396	33.7585	49.9442	29.2502	21.7168	35.4463	32.133	13.7044	33.7196	65.3173	53.5032	548.788	58.2197	198.665	62.7813	31.1251	59.0698	23.5807	49.1716	22.1365
F1.01.26	1	1	26	J	pPLA.IIdeltaxpPLA.IIIbeta	0	139		0.004596	1.46085	17.7394	14.6375	37.0254	7.75394	25.9673	37.2932	46.0008	26.9303	51.5936	61.3404	25.4261	226.126	34.8564	64.7728	24.1698	127.75	31.9706	55.5016	53.2192	41.4205	39.4525	86.6102	19.8658	21.2008	33.1831	37.7911	5.70161	30.9461	77.3765	39.587	853.956	85.2303	243.171	65.7416	24.6518	71.0605	16.5619	51.7724	29.8887
F1.01.27	1	1	27	F	pPLA.IIalpha	0	214		0.00299	5.04154	22.0963	16.7801	45.0007	9.60114	27.366	44.5051	42.5039	31.8159	70.8844	82.8599	32.0002	267.477	46.1078	70.4121	36.061	153.815	34.5992	70.1016	54.5391	61.3944	38.53	92.3766	28.755	32.0474	42.098	44.5072	18.6285	31.1629	79.595	79.7079	590.843	100.196	277.975	78.928	31.5287	62.2261	25.3662	46.926	37.454
F1.01.28	1	1	28	M	WT	0	98		0.006552	1.75943	16.5277	13.716	30.0748	7.53735	25.2205	32.9691	40.3209	18.8948	46.1259	55.4389	26.0312	189.911	32.2789	59.6813	17.1422	130.838	21.0855	40.1842	40.8371	36.1198	41.0325	97.2092	17.6434	21.2619	30.2121	34.9025	12.1191	27.2779	59.4126	62.3353	553.49	89.0991	179.885	60.534	41.7622	49.4426	18.2782	48.4669	32.5263
F1.01.29	1	1	29	C	pPLA.IxpPLA.IIalpha	0	123		0.005214	2.81195	17.0449	12.8911	32.525	7.48227	30.7115	36.9406	47.1232	33.5204	52.2553	62.6335	29.1809	212.746	31.7519	57.549	29.1911	134.576	25.3959	42.7188	39.107	28.0019	45.5493	76.3418	15.9247	22.8601	35.3622	30.7592	18.2949	29.7004	58.2404	81.6389	461.095	71.1048	206.747	77.1119	25.2189	68.2085	20.1436	58.9044	26.9625
F1.01.30	1	1	30	S	pPLA.IIbeta	0	97		0.006576	4.34114	13.7762	17.1542	33.2495	6.25898	29.7823	31.9724	51.928	33.8066	47.8671	62.7702	26.4156	223.034	31.8154	61.1668	22.5468	118.071	23.5436	40.8298	39.6188	42.4238	42.8803	68.0613	26.4957	22.966	30.2348	54.4624	12.0353	23.4945	64.2239	51.4755	618.084	65.5007	203.957	67.4912	20.0261	59.1651	19.1684	40.4569	26.8987
F1.01.31	1	1	31	V	lox5.1	0	141		0.004554	6.56446	15.9762	14.0619	36.9203	10.3757	27.5457	38.0445	56.1901	27.4712	52.4513	57.8739	29.7157	240.611	37.6166	55.4484	30.8176	128.128	27.2428	44.4264	39.4488	32.3041	44.3008	60.3086	23.9988	22.5584	29.8215	41.4011	11.9016	33.2885	80.8066	59.7209	595.76	73.83	178.614	69.227	38.3739	58.3266	23.9295	58.9966	20.4873
F1.01.32	1	1	32	C	pPLA.IxpPLA.IIalpha	0	116		0.005506	5.02461	16.5361	13.0577	23.6533	8.35611	24.4508	38.1785	42.3203	25.0895	50.3917	54.1274	25.2059	208.122	28.7018	56.2416	21.8284	116.464	26.378	54.4253	45.4182	25.7179	28.7469	60.125	17.9353	22.1751	33.166	34.4776	15.7481	23.8109	84.5603	52.7364	528.594	68.0166	221.417	71.1385	21.2501	49.1438	15.1179	50.652	27.1678
F1.01.33	1	1	33	I	pPLA.IIdelta	0	100		0.00642	6.20645	16.2729	14.8985	26.3594	7.50462	34.9075	36.395	45.2769	23.5363	48.2995	60.3975	25.5412	194.448	28.7242	62.2025	29.1224	117.43	29.5735	45.88	50.1679	31.1666	29.5971	78.4126	26.5384	21.8076	35.5049	40.1438	18.8449	34.2449	71.7979	58.9625	797.246	84.3871	202.774	73.2147	25.231	61.001	18.0591	49.6854	31.022
F1.01.34	1	1	34	I	pPLA.IIdelta	0	122		0.005254	3.52867	14.2634	17.6195	31.2655	10.0542	33.6293	40.496	71.1843	31.3333	57.8037	60.9018	27.4921	231.269	32.4286	59.0742	31.9111	122.74	31.1203	51.6495	46.8875	33.397	36.8086	77.6914	17.1998	21.4466	35.4992	38.2918	24.4541	33.537	83.524	54.6588	790.521	103.798	180.038	72.046	30.2245	59.0095	20.1007	53.3642	32.5043
F1.01.35	1	1	35	S	pPLA.IIbeta	0	74		0.008706	3.14206	13.9829	12.3589	23.341	6.58656	27.0403	37.6404	57.4568	37.3548	43.3219	58.003	25.2897	213.99	35.106	54.415	23.2578	150.308	23.5202	38.7134	45.1522	22.8702	30.0862	74.2053	17.0275	19.9294	27.5144	29.1835	15.6619	25.7855	65.959	66.7011	1137.54	91.9795	178.529	61.9689	36.3008	57.6035	16.9284	67.6883	21.4337
F1.01.36	1	1	36	T	lox1.1xlox5.1	0	128		0.005016	3.89983	12.6832	13.9853	29.7652	6.55105	28.9449	36.235	53.7291	30.0561	50.1259	68.1177	27.9575	222.422	28.9248	60.9446	26.3469	108.73	22.7703	41.0192	44.1313	23.8477	30.6939	85.6667	24.7834	19.9146	32.5038	50.4034	18.8558	31.3308	84.3278	44.1075	799.034	90.1931	215.213	69.8528	23.3736	49.8097	24.4207	67.143	34.7115
F1.01.37	1	1	37	N	pPLA.IIIbetaxpPLA.IIIgammaxpPLAIIIdelta	0	114		0.005634	1.98879	10.7454	13.9799	32.3711	5.93144	27.3622	40.0812	57.8072	28.7351	56.9527	72.8663	27.2285	214.393	32.7242	56.6673	24.0563	129.014	21.9361	46.365	61.3494	35.2716	36.3167	77.4817	25.7	18.0668	33.7582	31.4074	10.7461	30.3725	72.5371	43.3743	637.59	88.7276	179.714	62.2408	23.7318	48.3325	16.7435	57.2814	28.6778
F1.01.38	1	1	38	H	pPLA.IIgamma	0	94		0.006812	4.42933	11.5629	10.9231	24.0493	9.11683	24.844	35.7719	48.315	38.471	44.6736	51.8423	26.6324	198.769	33.4721	56.4275	29.8499	113.98	25.5166	41.1361	38.8903	29.422	29.8541	70.9731	21.0733	19.5109	30.9776	36.8197	9.30564	33.6767	57.7259	42.1918	619.324	73.5966	181.064	56.5106	24.5874	56.3186	23.6313	55.2934	25.0795
F1.01.39	1	1	39	G	pPLA.IIalphaxpPLA.IIIbeta	0	138		0.004642	2.05498	13.7891	17.2532	41.8441	9.00468	37.6509	43.8965	83.9555	40.2251	60.272	89.597	30.9095	268.211	38.332	73.1804	36.8009	160.056	24.4687	49.8816	60.6863	32.3826	31.828	80.303	22.8326	28.865	35.2639	61.3693	24.7636	35.5044	92.1048	64.2054	864.518	112.012	272.099	78.1625	33.0313	81.7901	30.4618	72.5423	41.9271
F1.01.40	1	1	40	B	pPLA.I	0	119		0.005372	2.8565	14.7874	14.8357	30.7751	7.88578	29.1823	37.7183	64.8087	33.594	50.7899	64.7444	21.2139	221.154	30.1933	61.8789	30.0375	121.624	24.809	40.8195	41.3166	29.418	35.5924	61.44	10.5748	17.2584	32.8572	41.3068	15.7647	29.2442	78.3066	46.0442	837.27	97.9096	226.013	55.891	24.5736	61.0024	15.0061	56.5138	32.5423
F1.01.41	1	1	41	B	pPLA.I	0	183		0.003494	2.55308	16.9023	13.5679	27.587	7.40749	32.4119	36.7469	67.6415	31.5335	54.0698	71.685	31.3999	183.217	31.6899	62.7914	28.6393	136.853	21.1416	40.6606	45.588	24.7867	31.7047	68.1653	14.0228	22.1217	37.2876	35.6332	16.383	30.6932	71.4159	64.1784	524.087	82.8492	208.147	72.7447	24.5268	56.7174	23.7309	51.1145	37.8334
F1.01.42	1	1	42	K	pPLA.IIIalpha	0	88		0.00726	4.35021	15.3575	16.0613	33.1199	11.3073	33.2164	42.1534	85.6104	39.7782	59.771	77.7689	33.5048	217.943	36.1956	71.7308	30.6865	136.735	28.8432	49.087	56.1225	39.5859	21.3376	58.2658	31.6289	28.794	37.4808	49.9469	18.6382	34.7335	73.2628	56.2307	728.259	85.8481	211.269	67.5054	30.6452	62.0266	30.8674	47.5299	36.3573
F1.01.43	1	1	43	N	pPLA.IIIbetaxpPLA.IIIgammaxpPLAIIIdelta	0	85		0.007546	2.21679	12.7801	13.7893	30.2013	6.94172	32.3026	38.3985	75.8699	27.1693	50.9732	69.2646	30.6023	221.6	33.4843	59.5409	31.5049	153.413	23.0962	39.8838	46	28.3076	29.3083	64.378	11.2211	19.7449	25.8114	43.3091	19.2748	31.9021	68.6221	55.317	776.857	82.5152	189.492	57.9231	36.3277	62.8882	21.2562	66.9523	34.1781
F1.01.44	1	1	44	E	pPLA.IIepsilon	0	99		0.00649	3.16078	12.3628	14.1148	19.3193	5.95145	32.974	34.7911	58.1986	21.6939	45.3587	58.8049	25.0952	178.727	26.8879	54.1805	22.0224	126.931	20.1935	32.701	46.7789	18.0704	26.4936	72.1088	8.81285	22.2198	29.781	30.6901	15.8027	21.9947	64.8326	38.8682	724.237	66.4162	193.669	47.8278	26.3938	54.5932	14.9458	41.8969	27.1132
F1.01.45	1	1	45	E	pPLA.IIepsilon	0	89		0.00722	4.23994	13.2916	11.098	23.4939	7.93315	26.0626	37.5198	51.7285	26.3409	50.8508	55.9201	26.5711	204.668	29.0926	62.8129	24.5142	110.95	19.7886	36.5037	51.4986	22.5817	28.9987	76.4005	20.9804	20.7105	29.4268	44.4757	13.5048	29.1077	56.4361	33.8407	532.48	75.3497	185.593	56.043	20.4078	59.2466	16.5612	46.2977	22.3383
F1.01.46	1	1	46	R	lox1.1	0	166		0.003864	3.77583	24.0873	23.7319	48.7397	16.8708	52.581	71.3024	167.773	75.6674	89.9269	119.75	51.1834	360.852	57.8486	100.539	60.2558	211.861	43.0183	66.9455	118.507	65.1536	63.1925	145.423	42.3491	43.9873	56.5415	86.4484	39.0064	51.768	115.363	78.4929	1426.07	224.32	396.777	113.066	59.0595	118.588	31.8337	87.6785	55.3249
F1.01.47	1	1	47	T	lox1.1xlox5.1	0	183		0.00335	3.35602	29.8067	30.1975	49.014	26.3329	65.8931	85.9492	184.595	117.821	105.036	117.575	49.6272	371.132	61.3736	102.42	52.9429	181.531	61.3335	74.6266	100.367	94.8186	75.757	118.588	58.5847	47.4137	74.5601	101.523	36.8456	59.5973	93.1378	86.5548	879.727	191.063	372.175	148.889	49.307	93.4474	49.1577	88.1683	63.7428
F1.01.48	1	1	48	X	opr3	0	149		0.004286	2.80934	19.1071	17.5756	31.9507	11.7863	41.6037	66.478	129.636	77.1808	73.9098	88.1472	39.6478	314.776	44.3005	76.8498	42.7683	151.868	39.0323	56.6517	94.1911	49.5271	50.2339	94.275	28.8747	40.2649	53.8286	68.3514	30.1459	51.1317	78.8664	45.3988	659.735	136.447	291.389	103.854	43.7125	81.4716	24.4619	63.7173	45.5731
F1.01.49	1	1	49	U	lox4	0	160		0.003996	3.53494	11.3973	9.28708	27.3669	6.54883	34.5358	40.9116	77.5614	35.9031	49.5681	62.2289	25.1838	176.366	26.7622	55.3283	25.686	104.944	19.7854	27.2204	38.2547	21.2262	24.029	57.3743	16.256	22.0341	27.2251	31.3451	21.1225	25.5025	63.932	49.4103	434.43	77.6482	229.138	71.064	30.9546	52.8585	15.2138	48.3924	27.5493
F1.01.50	1	1	50	Q	pPLA.IIIdelta	0	155		0.004126	2.63701	12.0335	11.2732	30.4898	8.41447	37.039	44.02	94.8238	40.8022	56.1967	71.3632	29.2794	207.98	33.7397	64.6216	31.7785	137.112	22.1917	34.0884	32.9266	22.2593	31.2753	67.7216	13.5789	23.9665	26.8008	39.1115	19.4642	37.4514	78.5336	43.6993	736.373	122.988	286.497	74.4044	30.0733	67.0741	22.8696	57.3866	33.5786
F1.01.51	1	1	51	R	lox1.1	0	286		0.002234	4.31921	14.4966	12.002	38.8642	8.22862	39.1598	49.347	81.9324	40.169	59.3646	77.5657	37.611	214.334	47.0581	69.585	34.3865	143.576	22.7554	37.0203	48.567	23.6197	42.6585	65.6144	32.7375	29.0614	31.2596	43.2099	25.1051	33.5279	73.7304	61.4112	730.132	134.589	361.223	89.8561	30.3064	85.9674	27.7337	63.9678	42.7285
F1.01.52	1	1	52	X	opr3	0	163		0.00393	4.30487	14.1903	11.9732	32.3334	9.45274	35.3615	43.3895	105.721	42.9947	57.2474	76.153	30.6791	212.849	37.4996	69.5328	40.3788	121.123	25.4897	35.4588	55.6826	27.331	34.3393	68.6134	23.6647	22.523	31.341	53.6503	25.4775	34.425	80.648	57.4079	886.415	151.455	276.808	83.0133	34.1211	55.2004	20.24	50.3099	41.403
F1.01.53	1	1	53	W	lox6	0	131		0.004904	2.06849	10.6542	10.1362	24.2287	6.52894	33.8151	38.6045	88.0817	28.6102	47.0374	59.8378	23.2286	175.499	25.0638	55.237	22.3061	129.088	18.5808	25.4094	33.4931	17.8172	30.2283	45.6251	18.7699	20.333	24.7583	26.7636	15.6513	26.0276	66.8763	43.6138	584.73	86.8507	268.391	64.7128	23.1697	49.1335	16.619	48.2483	32.3377
F1.01.54	1	1	54	A	WT	0	113		0.005668	4.17841	12.9858	9.88093	28.8191	9.42094	35.0143	38.8015	95.9115	48.141	61.1478	70.1366	27.6931	181.668	30.4033	59.859	33.7694	125.452	24.7578	35.6336	32.766	21.4829	33.4625	65.7809	26.0288	29.9469	30.8999	40.4799	23.0439	28.7898	71.208	56.7449	629.79	98.3011	237.386	71.21	32.5576	64.3929	20.9519	59.5923	34.6015
F1.01.55	1	1	55	K	pPLA.IIIalpha	0	84		0.007606	4.10169	12.6584	10.018	27.3047	6.17962	34.9391	40.1731	77.7649	33.4745	46.706	66.1424	26.8052	179.581	31.1234	58.3884	29.2093	125.003	19.201	29.1519	31.3154	22.8051	31.1725	59.1193	15.5329	21.5671	25.1358	37.394	19.0905	28.3743	57.1694	47.121	565.487	82.0456	234.515	66.4853	40.2379	60.9722	18.3993	54.8889	26.3518
F1.01.56	1	1	56	L	pPLA.IIIbeta	0	98		0.006536	2.1133	11.8223	9.57174	25.7994	8.1121	35.0105	42.0208	85.6227	38.6456	50.9258	60.8479	26.7586	195.228	27.9703	55.7733	24.2478	133.63	18.6464	28.3577	37.3702	27.4463	31.1593	52.1304	21.415	25.2682	26.1252	40.9343	17.3466	27.4423	66.6451	54.2322	549.023	98.9506	242.031	73.9198	27.7937	69.071	25.4339	45.3906	29.5302
F1.01.57	1	1	57	G	pPLA.IIalphaxpPLA.IIIbeta	0	107		0.00599	5.69517	11.9704	13.7901	34.4287	8.54794	37.0398	50.3803	88.5631	38.5843	60.7159	84.8379	29.7596	223.304	35.3526	73.5336	35.3727	148.009	26.7661	35.5348	51.5709	27.1115	32.5034	91.6785	23.7744	25.1092	32.3861	62.1336	28.4292	34.3987	60.9824	61.5295	793.006	129.44	277.62	75.9131	40.948	71.7009	28.9804	64.4504	38.169
F1.01.58	1	1	58	D	pPLA.IxpPLA.IIIbeta	0	149		0.004306	4.16048	10.837	12.4349	35.3226	8.92788	33.8052	41.7116	88.8423	28.0983	57.3112	71.2835	25.5631	195.884	28.5428	66.8558	29.5868	118.072	22.4286	30.4628	39.6543	24.8386	40.9796	79.4076	16.4925	26.527	31.9432	35.1012	18.3005	29.6193	69.1939	56.4413	643.96	103.965	306.72	76.7763	28.7024	66.5042	24.9053	51.9489	39.819
F1.01.59	1	1	59	F	pPLA.IIalpha	0	139		0.004594	2.81257	13.6836	11.4416	31.2563	9.014	35.9771	43.6777	84.4509	32.0534	59.66	68.3048	30.034	205.518	36.3645	68.6632	26.8829	124.712	22.2374	32.4879	43.4724	22.4653	36.1688	69.9596	19.7082	28.1576	33.516	48.2113	18.5339	35.2608	72.608	39.0888	658.379	121.008	251.688	78.5799	32.6918	71.9431	20.9442	64.1898	32.484
F1.01.60	1	1	60	Q	pPLA.IIIdelta	0	97		0.006566	2.87202	12.4448	12.5886	35.8369	9.05797	35.0654	44.3695	87.804	46.1265	56.0549	80.7668	30.1893	215.637	34.2065	68.7872	32.9075	149.041	23.5869	31.0445	40.1428	26.1783	36.05	87.6779	19.7707	30.0367	32.7995	47.4993	20.4541	32.8774	69.9214	46.367	890.294	113.821	256.076	70.3654	24.4098	68.2792	24.2143	63.9811	33.1518
F1.01.61	1	1	61	J	pPLA.IIdeltaxpPLA.IIIbeta	0	166		0.003858	6.09718	20.3559	18.7816	43.4892	11.2909	45.5951	56.5745	99.8457	61.2732	74.0242	84.7921	37.6829	238.951	38.5964	76.6625	39.5242	162.937	25.2674	43.8241	52.6858	31.9736	46.778	80.7135	30.4167	40.6999	44.3268	53.6429	24.8571	42.5861	75.5352	72.8992	841.085	129.53	345.005	87.8907	42.3255	78.0172	28.8634	71.3438	39.0985
F1.01.62	1	1	62	D	pPLA.IxpPLA.IIIbeta	0	125		0.005122	2.83036	13.459	11.3637	40.2925	15.939	39.4054	44.7578	383.883	97.9518	57.3735	89.7865	29.1378	208.06	38.0182	71.2298	29.95	160.321	29.2825	31.8373	42.1612	25.0592	32.071	133.955	31.5116	27.5046	29.5197	65.7413	26.7843	33.4207	100.874	56.1574	597.87	139.367	234.613	88.8677	31.9693	70.3346	23.3752	112.066	39.8739
F1.01.63	1	1	63	U	lox4	0	161		0.00398	2.63595	11.5722	11.1928	28.6908	7.4564	36.5018	44.6622	89.0837	47.0474	53.0376	79.294	31.6324	193.9	34.5913	66.0588	28.5672	125.838	20.2466	31.0958	38.7716	23.0241	31.6721	55.3024	27.1532	26.5542	29.5402	40.8537	22.2879	28.939	68.0442	48.7228	671.739	129.112	297.936	74.1586	37.8515	60.0767	22.0437	66.1982	30.1823
F1.01.64	1	1	64	S	pPLA.IIbeta	0	89		0.007162	2.20066	10.1579	11.501	30.7236	8.40691	36.8052	46.3989	84.0922	41.1314	50.5973	72.118	30.4003	201.019	32.26	73.9885	28.6136	122.889	18.1613	31.2447	47.1332	24.3461	37.0814	99.1705	19.0009	27.841	24.6079	42.6166	19.1321	31.9593	78.8618	55.7766	836.654	126.814	254.72	60.7361	33.1403	78.1111	28.1327	55.5624	35.6066
F1.01.65	1	1	65	O	pPLA.IIIbetaxpPLA.IIIdelta	0	145		0.004416	5.64768	11.339	11.7001	28.4107	6.62232	36.9712	47.1413	66.6379	41.7166	56.5153	68.4036	27.9243	193.499	30.6203	68.9989	31.0188	132.326	18.0361	29.7372	45.434	21.8445	36.3354	70.5255	22.572	27.4081	30.3859	49.0271	23.5675	32.9273	88.8292	70.9043	863.466	126.31	292.179	73.1093	32.3432	61.1597	25.6869	56.0107	30.8783
F1.01.66	1	1	66	R	lox1.1	0	136		0.004706	2.61171	14.3484	11.0166	32.0346	8.04248	37.8997	43.9438	91.3959	39.2831	59.1058	69.4917	34.076	187.551	38.7395	65.3384	33.7156	114.755	21.8933	33.378	49.9671	27.6101	39.1909	79.7072	28.3277	27.4405	29.8337	41.6395	20.3289	30.7833	64.448	65.2544	596.592	117.432	253.339	70.0927	31.8043	68.6525	21.5724	55.1586	22.1918
F1.01.67	1	1	67	L	pPLA.IIIbeta	0	97		0.00658	2.57941	11.9006	11.4446	33.3886	8.72029	37.6814	46.0848	108.026	49.8529	56.0609	77.4309	31.2537	212.705	30.9477	77.0303	28.5149	125.943	26.1871	31.8069	52.6699	26.9712	36.9607	99.1919	27.6112	29.6967	31.5794	53.8019	24.5314	33.6607	95.7597	63.0897	982.497	153.346	261.845	82.1758	31.6459	81.8847	29.9533	59.6919	32.7601
F1.01.68	1	1	68	E	pPLA.IIepsilon	0	121		0.005308	3.23763	11.2277	10.4562	29.9077	8.69605	28.6273	39.7873	101.398	37.5515	51.2402	71.8665	24.5545	203.729	30.5658	69.6501	22.9945	151.443	18.4812	27.4491	47.2107	20.485	28.6433	85.2758	22.6928	26.3178	25.8682	45.0814	22.1726	27.7589	76.73	62.306	1090.06	141.732	234.737	64.2111	31.739	58.5188	24.6137	76.351	32.065
F1.01.69	1	1	69	N	pPLA.IIIbetaxpPLA.IIIgammaxpPLAIIIdelta	0	99		0.006476	3.10472	9.97476	12.1516	27.7636	7.00674	33.8838	44.8051	80.5095	44.5483	48.6415	69.3653	31.0824	200.006	30.4988	70.1237	33.4778	124.712	18.8564	32.4255	41.2885	20.5944	34.6364	81.4424	22.415	24.6414	29.7867	46.2304	17.0602	31.0038	63.0602	66.012	677.401	131.629	219.54	73.2678	32.1392	59.0408	19.7701	62.184	27.78
F1.01.70	1	1	70	F	pPLA.IIalpha	0	114		0.005606	3.87419	10.5617	12.8245	26.9895	6.44841	35.6534	44.4277	84.2799	28.6609	52.3535	73.327	28.7844	184.483	31.3405	65.9114	25.6866	151.662	16.6363	31.1387	36.2496	25.087	35.5305	80.6458	22.9981	24.1912	31.535	42.1403	18.1675	31.9667	64.5547	34.0813	710.778	97.3218	253.172	56.9373	38.4403	62.5472	20.4173	56.5354	28.1237
F1.01.71	1	1	71	M	WT	0	173		0.003702	9.05185	11.9471	12.323	34.1211	9.4393	35.9893	52.0477	122.206	53.9072	61.2589	69.3894	39.7893	206.178	35.8851	71.4592	34.9866	133.938	22.4805	35.5735	43.0051	30.0839	35.6422	85.388	24.757	29.9531	35.9599	50.19	25.0411	38.9874	71.7408	45.0736	501.416	109.907	266.989	81.848	33.7728	85.1068	25.452	66.5454	37.3082
F1.01.72	1	1	72	B	pPLA.I	0	151		0.004228	5.44685	13.5844	12.6932	36.2839	14.6063	52.0373	52.2184	439.785	87.0284	66.7328	99.4728	35.8481	242.526	49.2066	87.8556	36.6486	216.09	32.8767	38.324	52.698	33.5654	27.8276	162.787	34.0223	37.4511	35.9159	69.8854	37.7484	28.3382	116.333	64.4417	569.356	136.011	285.192	79.2258	62.1789	79.9249	27.305	161.143	35.2618
F1.02.01	1	2	1	H	pPLA.IIgamma	1	144		0.004456	1.14379	11.7119	11.9098	21.5998	7.66631	29.4784	40.2467	80.6856	42.9442	47.0691	63.7112	29.2041	274.688	30.1665	58.8347	25.4103	136.657	26.4772	22.9771	50.206	28.4937	28.6874	56.1682	20.2011	25.1565	28.4706	29.344	14.5362	26.6595	56.2125	47.1745	739.679	74.3128	161.131	41.4632	36.914	61.9213	14.8868	61.2037	22.3628
F1.02.02	1	2	2	V	lox5.1	1	300		0.002136	0.70688	9.02017	9.26595	18.4165	6.85288	29.2849	41.7036	65.9732	32.6379	47.1418	78.2674	30.2339	270.466	31.8055	63.0429	36.223	130.769	24.914	23.6197	38.5503	24.9492	30.1415	66.3581	19.2634	20.9425	27.9213	37.1187	17.7098	26.496	62.3179	30.4838	583.436	81.4483	223.419	38.1585	27.5968	54.7181	16.2636	45.9322	20.7454
F1.02.03	1	2	3	K	pPLA.IIIalpha	1	146		0.004398	2.85126	10.6205	10.7989	28.7148	6.79761	34.8083	43.8244	72.1992	32.5051	57.4515	73.4587	31.7905	309.292	32.9699	67.9038	34.8793	146.253	28.8328	30.1058	53.0338	32.2706	36.1389	85.2625	18.95	23.3679	32.7822	42.3295	20.767	26.6038	78.7611	43.3278	577.003	86.2988	168.056	51.6116	31.8249	76.557	19.8952	58.0802	31.0209
F1.02.04	1	2	4	G	pPLA.IIalphaxpPLA.IIIbeta	1	106		0.006024	0.890917	9.12475	8.44068	19.9092	6.75347	30.5769	38.2136	93.4993	36.3666	47.2795	68.749	26.8087	300.111	31.8896	61.6218	24.9737	153.906	25.784	21.9756	46.9333	23.8798	25.786	87.4066	16.5179	20.6873	23.7349	36.26	12.264	26.7944	67.9098	38.6528	1007.32	96.8249	158.528	36.3759	34.9289	64.7647	16.2213	55.2036	25.7102
F1.02.05	1	2	5	I	pPLA.IIdelta	1	134		0.004792	2.79383	11.5281	11.5847	24.2449	7.50702	36.4691	39.7698	82.5535	26.0268	52.3858	63.427	32.3727	268.005	32.697	59.7312	32.3448	129.359	27.3382	28.9927	47.7238	29.3669	32.4926	80.3158	26.8736	22.4166	31.6288	36.6328	21.0471	30.0348	78.1687	35.9408	516.665	82.6053	133.444	47.4898	35.0332	75.5156	20.284	48.5344	31.0532
F1.02.06	1	2	6	T	lox1.1xlox5.1	1	155		0.004142	0.967222	11.2275	9.83431	26.6239	6.81486	33.2377	46.3115	78.8937	35.3381	50.6937	65.3367	34.9614	272.934	34.949	69.3469	37.6287	145.186	28.2683	32.0086	50.3298	29.6809	36.6059	79.8579	23.3173	23.11	30.9146	49.1594	18.202	28.9629	68.8935	51.7593	574.08	88.0432	168.399	48.801	30.9985	65.5329	19.5424	47.5497	31.0052
F1.02.07	1	2	7	Q	pPLA.IIIdelta	1	161		0.003984	5.82986	11.0061	12.0553	25.0379	7.7369	36.9764	46.6141	92.7925	39.2416	49.1188	75.1032	33.1401	278.457	39.1349	67.5111	28.6383	129.023	23.2315	25.6437	43.281	22.4428	34.1952	70.5309	14.1197	21.6483	27.4591	39.6859	23.6928	30.9002	77.575	42.0335	425.694	80.8984	137.215	46.7192	40.3992	81.1217	19.5282	63.3765	31.0222
F1.02.08	1	2	8	C	pPLA.IxpPLA.IIalpha	1	144		0.004458	0.272817	8.43183	8.80126	21.9687	6.26848	31.9199	40.5234	87.0038	27.5041	46.6313	83.5237	28.7425	284.589	30.5988	61.5167	28.2403	157.778	21.8916	22.5691	45.7993	22.6951	26.3139	77.9798	13.9841	20.5618	22.9481	29.5024	16.5403	25.0342	51.957	37.4616	673.402	75.6488	168.054	37.3803	24.9112	56.2814	17.1456	48.7139	26.6896
F1.02.09	1	2	9	A	WT	1	135	removed data	0.004742	3.04397	NA	NA	NA	NA	NA	NA	NA	NA	NA	NA	NA	NA	NA	NA	NA	NA	NA	NA	NA	NA	NA	NA	NA	NA	NA	NA	NA	NA	NA	NA	NA	NA	NA	NA	NA	NA	NA	NA	NA
F1.02.10	1	2	10	W	lox6	1	119		0.005392	0.639894	14.0398	12.9714	34.961	10.7582	38.1987	50.5499	77.0319	39.5274	56.8935	86.4801	35.4799	284.471	33.1393	71.5153	44.7681	170.905	35.4668	37.199	54.2636	32.3666	37.6622	98.2137	18.3787	31.8803	35.3544	45.297	21.292	34.1578	86.4869	46.1152	686.646	87.1983	161.618	52.6134	35.7072	78.3213	18.5055	54.2644	38.4448
F1.02.11	1	2	11	X	opr3	1	207		0.003088	3.05623	11.735	10.9286	25.6896	8.24847	34.7597	43.6209	83.5213	38.0461	53.9414	74.6568	32.1528	228.701	30.3558	67.1327	34.1109	107.956	25.5632	38.5585	59.3957	28.5221	32.0582	67.898	21.0851	24.7598	35.7959	39.5691	24.1043	28.9855	54.1006	57.519	378.489	81.3999	157.639	64.8688	48.6027	61.3947	22.009	66.0009	31.8547
F1.02.12	1	2	12	P	pPLA.IIIgamma	1	251		0.00255	1.12003	9.05007	11.2815	24.2984	8.04505	34.3658	45.2928	75.5286	42.0205	50.1112	81.1201	30.2616	262.349	32.9911	68.8375	33.3445	130.428	27.5149	29.3855	53.195	27.0206	26.5554	89.3052	19.8917	26.1154	28.87	44.8187	22.283	28.5727	64.6524	48.1839	605.898	90.7477	198.033	46.9865	35.0958	70.4617	17.8817	46.1401	32.1272
F1.02.13	1	2	13	W	lox6	1	219		0.002928	0.0726744	10.7397	11.5531	26.9637	7.42435	36.0034	53.8112	78.7774	40.6695	57.9333	85.2355	35.5401	298.995	39.3391	74.4307	41.1928	171.369	25.0686	28.23	53.6759	26.7812	33.3899	97.795	22.2668	25.0634	32.3772	42.7519	23.5424	33.6589	78.3105	44.7641	644.111	97.3339	234.844	46.7418	40.065	84.9952	24.3135	70.5821	30.6337
F1.02.14	1	2	14	P	pPLA.IIIgamma	1	152		0.004206	0.265957	12.0434	14.289	30.8861	7.85906	34.0434	45.4034	87.1683	34.0323	54.1944	88.8252	30.6922	245.447	28.9118	67.5971	39.8865	145.043	24.0415	31.0829	46.6301	27.1278	32.392	108.652	19.2591	25.6173	31.056	44.3457	23.4809	30.6882	77.5385	56.7698	515.311	83.7888	184.384	47.961	30.7594	75.2832	20.9645	53.5499	29.776
F1.02.15	1	2	15	H	pPLA.IIgamma	1	122		0.00525	0.360954	12.4686	11.9835	27.9729	9.17432	35.819	47.4525	94.4899	36.3115	60.8529	88.4054	32.2901	298.885	36.8386	74.6551	39.9555	154.626	22.0736	29.7312	56.1543	28.0288	30.2348	115.378	16.7778	26.7553	30.0613	51.3581	27.0795	26.1238	81.6043	44.1341	1010.57	126.917	171.186	46.4561	41.306	77.5758	25.9092	65.2055	34.5326
F1.02.16	1	2	16	O	pPLA.IIIbetaxpPLA.IIIdelta	1	141		0.004548	1.51093	14.5032	13.0037	31.1843	9.80364	40.6422	51.431	79.4153	44.5756	59.8188	95.5004	38.7842	320.605	35.9986	75.0825	38.0434	150.023	30.0152	36.3579	60.2023	29.6091	45.1816	123.586	20.5066	28.7075	33.6963	48.8293	27.1102	32.2373	66.1716	47.9667	636.145	99.2737	166.486	57.9514	36.343	77.1796	20.6616	58.1059	36.2215
F1.02.17	1	2	17	J	pPLA.IIdeltaxpPLA.IIIbeta	1	149		0.004296	5.1534	11.0268	11.3783	27.1732	7.35853	37.4223	45.1439	82.9005	37.3836	58.4798	96.5483	34.5115	290.222	31.5399	67.3146	31.5019	151.119	25.8667	28.29	53.3887	22.9082	27.3382	99.095	16.7101	27.5262	30.736	49.9826	21.4191	28.2088	80.248	44.8714	760.522	104.657	199.772	49.3316	31.8808	77.1251	22.0532	48.7646	37.3702
F1.02.18	1	2	18	P	pPLA.IIIgamma	1	114		0.005598	0	9.82757	10.3814	25.0653	9.11796	34.0171	53.1591	101.109	43.6354	61.8672	112.364	33.5195	296.254	34.1858	72.0415	42.1947	157.888	30.7814	23.7775	54.584	24.9349	30.2625	113.076	18.9468	26.6888	30.3288	54.5726	20.1121	32.8313	93.7453	33.3488	978.086	96.2531	181.246	46.4097	31.9611	69.6561	21.4284	53.3139	29.5122
F1.02.19	1	2	19	U	lox4	1	179		0.00357	3.24507	14.4478	10.9683	32.0109	9.73525	44.4661	49.2673	92.102	42.7019	67.5302	84.571	39.7047	295.979	37.3585	74.5743	34.2618	158.63	28.6001	31.6128	51.1551	25.7014	40.3346	81.2096	22.3044	29.3455	34.4949	47.5007	22.4139	33.6684	75.6395	45.772	683.789	84.7764	223.904	54.7691	43.152	82.1967	20.6728	69.7406	38.9511
F1.02.20	1	2	20	L	pPLA.IIIbeta	1	171		0.003736	2.25564	11.5466	17.278	34.3383	10.7745	51.6292	60.0884	136.324	60.0586	77.9876	110.901	43.8478	315.172	38.3002	91.5665	46.7263	165.347	34.2127	35.2862	62.659	31.7739	45.3646	126.746	23.8835	37.4567	38.71	59.8702	29.9838	42.7764	83.5907	62.2785	765.669	112.864	202.469	68.9798	42.4089	104.528	28.9255	64.9121	38.4332
F1.02.21	1	2	21	O	pPLA.IIIbetaxpPLA.IIIdelta	1	165		0.003886	2.17714	10.8467	13.0947	26.5104	8.53939	44.3006	48.4206	99.0768	44.459	63.1181	84.453	30.7834	298.694	31.56	74.969	31.9683	161.513	23.5447	33.2907	57.2167	24.629	32.2118	98.6046	19.9679	27.9636	32.6826	40.8276	28.6781	30.3279	82.0222	45.9352	737.996	107.469	217.585	54.3144	37.4531	90.063	23.3844	52.647	32.2294
F1.02.22	1	2	22	M	WT	1	164		0.003892	1.55892	10.5716	10.0868	30.1309	7.52492	39.867	48.1714	96.9117	35.082	53.4058	83.3556	31.7862	269.778	34.1411	68.276	33.8239	123.324	23.3121	30.0867	47.0079	22.3372	29.5413	96.8479	13.4705	25.5926	32.1449	44.0328	19.9847	25.5974	74.2003	44.7189	634.941	97.0236	174.564	53.2726	38.2182	72.9452	24.4185	65.3166	31.1166
F1.02.23	1	2	23	A	WT	1	142		0.004522	0.757193	15.3344	13.9578	34.0487	11.6628	41.612	62.0206	116.312	49.2304	71.2706	87.871	40.0002	260.223	36.5101	85.6858	32.6015	144.212	30.4357	36.0612	55.1739	34.0968	44.0854	116.731	23.256	29.8073	37.9294	47.9328	24.5982	37.153	84.6145	42.1877	544.322	114.953	166.34	70.5965	41.3554	101.797	31.4194	69.6671	46.9755
F1.02.24	1	2	24	D	pPLA.IxpPLA.IIIbeta	1	246		0.002606	4.13616	15.5508	13.198	33.9581	13.9875	44.9047	58.3338	99.2104	62.839	65.6592	83.6752	37.8205	261.116	39.3631	86.2852	40.2874	162.358	35.7198	32.4758	52.7956	32.2115	38.3443	98.7374	23.8382	31.5843	41.8235	48.0215	27.346	36.5013	80.0173	52.8277	820.502	119.176	223.297	66.7877	37.6193	75.9014	25.9148	50.6655	40.9724
F1.02.25	1	2	25	V	lox5.1	1	194		0.003306	1.86079	17.5493	14.2311	28.2168	10.3491	45.7339	44.7785	54.5215	45.9572	57.5517	90.13	30.3633	245.141	39.0919	76.7931	41.3099	129.792	30.496	31.4945	46.6627	31.0722	30.7422	100.036	18.4227	21.6721	36.2026	28.1839	20.3262	27.2848	67.7172	47.6951	612.925	99.7945	174.381	47.1053	39.6931	79.2154	23.8816	54.4959	24.5558
F1.02.26	1	2	26	J	pPLA.IIdeltaxpPLA.IIIbeta	1	170		0.003762	1.23945	24.9999	21.1983	39.0211	23.0078	57.8947	64.5203	78.4996	68.2864	77.1845	116.845	44.0812	317.09	41.9963	86.59	52.1441	164.699	49.4892	39.2014	57.7694	53.2841	36.8238	92.1523	47.8688	34.1604	47.9803	48.1374	27.262	40.1228	75.3072	70.2434	1134.24	124.488	272.177	69.7929	48.362	78.1451	33.423	65.2129	37.9831
F1.02.27	1	2	27	F	pPLA.IIalpha	1	113		0.005658	2.10657	14.6855	16.9297	28.1618	15.2398	36.0963	46.4408	59.6269	48.299	53.0472	81.6279	32.728	225.298	33.2684	65.3928	30.5987	126.117	39.0966	29.6358	38.0711	34.1608	36.5273	72.4346	30.6559	29.1519	39.3468	27.929	21.5341	30.1169	61.1144	40.4141	729.65	91.832	122.567	52.5867	31.5181	64.1331	19.857	44.6435	31.5435
F1.02.28	1	2	28	M	WT	1	108		0.005942	0.451807	10.4849	10.0456	26.6435	4.54635	30.7097	34.9876	54.5736	16.99	42.2605	63.6974	28.4025	227.158	26.1494	65.8233	25.8799	121.767	18.9563	18.7221	46.0878	15.9406	20.1992	112.372	7.68419	16.8586	21.89	33.2988	13.9229	19.8021	71.36	24.4053	950.395	113.315	143.87	33.0853	32.5034	68.4198	14.5793	59.7487	22.145
F1.02.29	1	2	29	C	pPLA.IxpPLA.IIalpha	1	121		0.005304	1.20605	16.108	13.367	33.8992	8.92436	34.1082	39.4254	60.9837	28.1084	53.8327	84.5254	33.8374	278.95	34.0109	75.7603	39.1555	151.441	23.1123	32.1073	49.442	24.5958	39.0457	122.394	22.6296	26.0393	32.4429	27.771	25.0889	28.1416	95.3343	40.9714	602.137	106.708	190.871	44.7187	40.0525	91.448	26.2528	58.7593	31.9408
F1.02.30	1	2	30	S	pPLA.IIbeta	1	114		0.005612	0.944981	14.0017	13.8055	27.4568	13.6696	40.4894	48.5235	51.2096	44.7967	56.6001	77.8056	33.544	251.229	30.1313	73.9057	30.8524	157.196	37.5752	36.5046	45.0971	43.4009	28.5689	90.16	38.7884	29.5145	33.0098	37.3142	23.1381	31.3502	74.3698	49.2684	563.905	83.0581	163.876	53.8757	34.86	72.1349	24.1685	50.2561	31.6986
F1.02.31	1	2	31	V	lox5.1	1	243		0.002632	3.38753	17.0525	17.0999	41.2436	13.9864	45.1002	51.634	60.3829	55.1676	66.2888	82.3909	38.2544	237.317	41.364	81.1649	36.1522	161.224	42.6481	40.8678	56.3261	44.0006	46.6339	86.9391	36.3954	31.7396	45.0091	44.1722	25.1331	29.709	71.612	36.9311	457.179	90.2032	221.021	57.7853	46.7477	71.2095	31.0568	59.9237	27.0762
F1.02.32	1	2	32	C	pPLA.IxpPLA.IIalpha	1	150		0.004264	0.302877	10.3827	12.7988	22.6126	6.16992	28.2349	39.0254	48.6696	20.7951	46.6978	68.217	29.6974	218.848	31.2001	71.8997	33.3252	140.603	22.4468	29.011	49.8972	22.8403	33.183	76.5429	17.6002	20.507	29.4891	32.3872	17.0133	20.3041	67.5471	29.9524	660.479	102.792	175.486	38.9967	30.9605	70.2958	19.71	50.0741	20.4252
F1.02.33	1	2	33	I	pPLA.IIdelta	1	144		0.004444	0.512528	15.368	15.0488	28.6693	11.8302	35.6112	49.6533	66.5242	33.2043	60.5367	78.4745	36.4009	235.445	36.8401	76.5161	35.9044	146.369	27.1206	33.2935	60.2894	32.3366	33.8405	85.3865	23.7436	27.9975	35.372	36.2432	22.0522	28.6118	82.2203	35.8683	559.62	97.1412	169.41	51.2086	34.1511	72.1731	26.5785	58.3039	28.8768
F1.02.34	1	2	34	I	pPLA.IIdelta	1	135		0.004756	0.575264	12.0483	13.5709	29.1361	7.5371	37.563	48.2916	60.4226	33.5192	57.9696	71.8211	32.9017	217.613	30.7457	71.135	41.1435	148.762	31.0396	32.5658	58.0429	25.3869	42.6033	93.1036	24.1479	23.8169	36.1723	33.3782	21.6279	28.2613	79.6252	32.0673	620.652	102.03	173.522	56.3322	31.3193	76.9624	20.2582	45.2605	28.4429
F1.02.35	1	2	35	S	pPLA.IIbeta	1	161		0.003966	3.44074	15.0004	17.0161	30.614	16.9278	42.5977	53.4407	68.9719	46.8199	66.3147	74.2936	37.3862	228.75	40.4954	80.2159	39.033	139.557	45.7905	35.1158	51.2299	38.46	35.4151	83.7037	30.8805	32.4776	39.4543	41.5046	27.4767	28.0177	75.1989	39.189	653.74	101.396	167.404	55.7108	45.6883	76.0709	21.7714	57.2587	31.2095
F1.02.36	1	2	36	T	lox1.1xlox5.1	1	310		0.002062	1.21746	17.1593	18.7147	33.0241	19.7963	42.4757	59.5188	68.4693	63.3169	70.2162	76.7598	41.7444	266.434	40.5991	78.9331	51.1531	142.793	52.3457	39.613	59.9871	48.0858	42.1078	95.328	36.1546	33.0565	44.0001	45.6574	18.8901	32.3715	79.3454	49.8891	723.179	121.253	239.619	65.5294	42.4859	88.5086	24.5696	59.1258	36.512
F1.02.37	1	2	37	N	pPLA.IIIbetaxpPLA.IIIgammaxpPLAIIIdelta	1	158		0.004046	1.03796	13.0092	14.7473	37.8022	8.16527	36.0745	42.659	58.6958	25.0486	65.6083	76.5772	35.4334	267.712	32.0025	73.8274	41.4588	136.422	26.4087	35.2649	49.936	29.6019	35.5653	89.5985	17.8147	26.9047	31.0033	39.5504	25.0541	26.2604	80.3359	32.7075	586.428	105.416	192.596	53.1118	40.4808	69.9851	20.0081	50.9777	25.6899
F1.02.38	1	2	38	H	pPLA.IIgamma	1	183		0.003502	4.09708	14.2912	14.0242	33.5005	7.22771	44.7486	53.8393	62.2847	45.277	70.0828	77.6663	37.4193	246.17	33.1602	79.0562	43.1003	119.202	27.9203	45.0552	61.3828	35.3076	45.1753	91.0097	27.5153	29.1279	38.4407	36.0424	27.3811	31.4684	73.7032	44.3443	512.832	127.631	171.293	64.8048	39.6903	79.8468	22.6209	53.1289	30.0344
F1.02.39	1	2	39	G	pPLA.IIalphaxpPLA.IIIbeta	1	98		0.006508	2.78155	17.2363	17.9497	37.2774	11.1884	46.3252	51.9309	71.2143	43.7277	94.4897	91.6886	51.227	351.129	45.5608	88.8585	43.7256	174.398	44.051	50.2717	67.8513	43.9305	47.8721	140.135	28.5852	35.7069	46.591	41.7795	32.5784	37.4893	108.532	55.4595	601.614	124.737	226.87	61.8537	64.2127	109.851	30.7788	94.857	36.2979
F1.02.40	1	2	40	B	pPLA.I	1	119		0.00537	2.219	16.4496	15.5024	31.0107	13.9158	41.6222	50.4596	57.3988	54.0454	62.8279	67.4898	36.4907	257.498	35.4847	78.7144	36.9447	149.728	36.9284	34.0554	51.9184	43.686	38.5542	79.6556	25.9072	29.3633	43.094	29.0965	26.5181	27.1262	59.7776	53.0749	581.213	88.4723	186.803	60.738	35.4741	75.7242	18.3747	59.0804	28.7703
F1.02.41	1	2	41	B	pPLA.I	1	115		0.005544	0.710683	24.0846	23.2961	45.0115	20.7156	64.1116	77.1912	81.2946	54.3547	115.237	109.296	55.8641	378.341	62.0094	126.757	66.8216	236.893	55.1005	54.4471	79.6204	49.9083	56.6805	145.869	39.598	41.9784	53.5905	74.9963	38.3203	49.0601	114.284	64.4932	690.489	160.691	269.516	78.2816	70.2785	123.16	38.6086	101.137	48.7502
F1.02.42	1	2	42	K	pPLA.IIIalpha	1	95		0.00673	1.28425	16.9764	15.3864	31.6595	13.4277	40.9999	47.0427	61.1484	48.5662	72.3611	79.8696	37.449	257.724	36.2797	82.6245	39.0737	155.598	41.0116	41.4472	58.2352	44.0107	43.7491	95.4067	32.2874	35.2531	43.2932	40.7186	24.1819	33.7879	93.1647	40.0648	746.627	114.524	167.879	55.2999	39.5539	97.8591	27.9298	57.9495	30.116
F1.02.43	1	2	43	N	pPLA.IIIbetaxpPLA.IIIgammaxpPLAIIIdelta	1	135		0.004756	1.49829	13.2915	16.1002	33.9954	9.73138	45.3007	57.8568	63.9709	45.3465	72.4879	75.5022	36.4981	253.995	39.7259	84.0626	27.1618	173.513	30.9716	37.552	51.5267	35.006	49.5038	73.2421	16.1065	28.2743	42.3266	44.743	25.8537	32.853	80.521	51.6077	610.334	105.566	151.111	53.9975	47.2862	84.5246	26.4051	79.8381	39.0964
F1.02.44	1	2	44	E	pPLA.IIepsilon	1	974	removed data	0.006574	4.5756	NA	NA	NA	NA	NA	NA	NA	NA	NA	NA	NA	NA	NA	NA	NA	NA	NA	NA	NA	NA	NA	NA	NA	NA	NA	NA	NA	NA	NA	NA	NA	NA	NA	NA	NA	NA	NA	NA	NA
F1.02.45	1	2	45	E	pPLA.IIepsilon	1	115		0.00558	1.8797	11.211	12.5479	23.0724	6.50599	28.8734	37.1804	46.8836	23.2489	59.7086	60.9516	28.279	216.393	29.3564	60.8019	31.9968	142.426	24.4161	27.1019	44.3003	20.9097	33.0692	92.394	18.0502	24.1089	25.1886	27.8855	13.8584	25.4916	68.1779	28.3519	393.686	69.7398	200.965	43.755	36.0631	76.4156	18.389	49.0239	26.3362
F1.02.46	1	2	46	R	lox1.1	1	184		0.00347	2.83998	16.7174	18.8097	38.8227	17.7667	53.2914	61.7558	75.9159	52.9103	79.9065	78.0101	49.3619	281.98	53.2845	90.4183	39.6068	163.933	39.2389	51.8263	77.1638	51.6176	45.3869	97.2479	36.8936	36.9658	43.3557	50.7337	31.6318	37.1579	68.5077	53.9741	672.434	121.028	237.218	68.8715	63.1774	96.0517	36.8351	63.0004	36.5548
F1.02.47	1	2	47	T	lox1.1xlox5.1	1	183		0.0035	1.42774	14.6616	17.263	32.0962	12.4536	44.4078	57.4218	65.8039	46.7081	73.3556	81.3392	41.0733	258.654	37.3422	76.8855	33.5017	147.497	37.2236	40.7323	59.1464	40.2697	41.5489	91.7452	28.3165	32.3475	38.8293	49.5995	25.1898	34.0908	74.9893	55.6804	637.513	109.421	191.065	60.6104	44.6322	73.5809	29.9456	54.0948	38.2976
F1.02.48	1	2	48	X	opr3	1	310		0.002066	0.166528	22.7419	80.7239	41.515	14.4947	47.9533	66.3148	73.7107	40.4461	73.9989	65.903	41.52	263.739	39.2035	83.1911	50.6786	105.643	37.9187	59.792	59.1619	44.7155	93.5529	80.9299	34.8583	32.3974	45.7511	40.6887	33.2221	46.0465	71.181	44.5949	387.778	104.674	219.868	76.0679	46.1911	72.805	42.1057	58.6165	44.753
F1.02.49	1	2	49	U	lox4	1	208		0.00307	0.701262	11.2134	12.6288	27.6897	6.22998	37.9231	43.6612	62.8373	25.5615	54.7058	79.9604	30.271	218.229	32.5412	76.4596	34.0326	110.413	27.0203	29.9806	45.4314	21.8148	31.1305	70.3901	14.9711	24.5294	33.6372	34.6047	21.4619	26.7327	66.5197	45.1161	539.338	92.5743	195.643	50.1051	41.5305	78.6332	19.2541	67.2959	31.4213
F1.02.50	1	2	50	Q	pPLA.IIIdelta	1	119		0.005394	1.22117	14.148	14.4298	30.2682	8.54501	40.4794	43.177	71.0246	34.6836	62.1856	81.365	35.7314	244.903	32.9383	84.5095	39.3506	147.99	23.7187	34.5675	58.9047	28.4648	37.5474	91.1652	19.3806	26.8448	37.4116	34.6069	23.9015	33.6142	78.6681	55.4865	569.162	113.432	196.731	53.9805	34.7474	84.8946	25.9545	62.4864	31.7662
F1.02.51	1	2	51	R	lox1.1	1	134		0.004768	0.788146	14.2173	13.0727	28.7855	11.2493	41.2543	51.0497	62.2829	47.487	61.1615	82.5967	38.0282	277.261	37.3138	74.7607	41.4836	141.855	38.8987	35.3521	60.9064	25.4307	33.0038	88.1587	19.3602	25.0352	35.4742	40.5384	24.2974	26.0926	78.5678	44.7628	759.092	120.289	187.737	57.0977	41.8216	81.5469	21.8618	55.2491	31.2942
F1.02.52	1	2	52	X	opr3	1	127		0.005026	0.672483	14.6994	14.5585	26.6115	13.3088	43.7674	57.2382	57.5979	48.0475	64.6862	77.2061	33.1459	218.718	35.0454	74.385	37.3248	107.846	39.1864	33.6374	53.4596	36.0772	33.2979	76.9375	23.2067	28.0359	36.5473	36.1481	17.8499	35.7694	65.253	50.6068	794.123	117.468	181.632	54.2028	37.9983	78.889	18.2555	65.0588	26.6341
F1.02.53	1	2	53	W	lox6	1	112		0.005704	0.393546	16.9551	16.905	47.6268	16.1957	46.155	58.9153	82.1482	63.9466	75.1099	92.9689	38.09	266.989	39.3522	88.7968	46.8271	148.595	44.4632	45.9375	73.7893	48.601	41.9805	111.841	25.4401	31.9783	43.619	58.3556	34.841	34.9519	78.5138	56.6269	824.467	138.984	187.953	77.8263	50.3496	84.1926	32.7678	68.4763	38.4123
F1.02.54	1	2	54	A	WT	1	114		0.005612	0.563431	14.1132	14.3808	27.6936	12.7151	40.9073	50.4755	65.4464	48.4269	61.2727	74.8819	33.1061	227.56	33.7864	75.7851	37.5856	133.741	44.7881	29.6175	55.1698	36.4557	30.21	90.399	22.9516	26.2364	35.2287	40.6505	21.9121	32.9465	66.3108	48.7398	1099.32	133.576	203.36	52.2143	31.4232	72.327	24.5145	47.8321	24.7022
F1.02.55	1	2	55	K	pPLA.IIIalpha	1	108		0.005912	1.86065	15.6001	14.282	41.8647	11.5455	43.7085	45.5886	73.142	49.4193	63.8637	77.526	33.0869	227.6	37.0294	78.0423	36.7295	138.392	28.6698	34.7302	48.625	38.4709	32.7584	81.5696	22.4256	27.2752	37.2757	33.4671	24.7187	33.5569	75.3187	45.3951	731.801	110.028	173.654	50.3649	42.2508	84.1508	24.4634	70.6856	31.7582
F1.02.56	1	2	56	L	pPLA.IIIbeta	1	133		0.004826	1.41509	14.3147	13.5924	25.6678	6.63657	42.1409	46.5007	61.3676	34.5454	56.4013	80.4836	34.945	221.735	31.1693	79.7754	34.4807	135.53	32.5493	27.4561	54.8656	26.3887	38.2863	79.493	13.1878	21.7901	35.8995	42.0314	25.3587	28.9577	91.9652	42.5953	700.19	110.444	210.642	52.7335	41.2614	79.2928	20.734	53.5495	27.3154
F1.02.57	1	2	57	G	pPLA.IIalphaxpPLA.IIIbeta	1	149		0.004298	3.42212	20.0774	15.8158	34.2365	13.2505	49.0207	57.9479	73.1566	52.2732	78.8651	87.6924	44.9085	304.375	38.0562	95.9708	45.311	196.944	44.1863	37.545	68.0973	32.3697	39.5071	121.014	31.5757	34.1423	44.5106	54.7019	29.0011	39.0111	99.0218	54.4346	908.003	152.64	274.849	61.3314	44.5275	95.493	24.7228	67.0781	41.7186
F1.02.58	1	2	58	D	pPLA.IxpPLA.IIIbeta	1	114		0.00559	2.63158	15.5864	13.1592	29.3429	12.1384	41.7484	54.1751	56.8267	48.1625	63.6369	78.983	34.6836	243.176	35.06	78.6425	36.5388	168.243	37.6171	33.5751	74.2648	32.4674	39.058	87.9246	25.584	29.2585	37.3412	40.5492	31.5973	35.3221	74.7026	53.081	1007.04	121.93	220.314	55.8511	34.7813	83.8019	18.9862	56.3229	38.0126
F1.02.59	1	2	59	F	pPLA.IIalpha	1	110		0.005808	1.00705	11.6717	12.4553	27.1444	7.1733	37.8141	45.6975	60.9073	30.239	54.5533	77.4943	32.0437	217.484	36.8245	71.9385	33.5787	124.68	21.2864	27.9632	49.7042	30.7802	29.2319	84.1394	22.0173	21.9048	31.8377	39.4287	21.9932	30.0078	67.3844	48.9766	819.269	117.456	159.46	43.4428	39.4821	78.1027	14.6161	47.5452	24.9499
F1.02.60	1	2	60	Q	pPLA.IIIdelta	1	222		0.002884	1.27246	12.2817	15.3405	30.863	10.8745	42.3207	47.2514	57.4779	45.2907	65.4494	76.7913	35.1828	232.66	35.5051	77.964	30.4984	133.381	31.6546	30.4832	49.8735	29.649	35.9043	84.3392	21.7096	30.384	33.2181	35.127	27.1984	30.8085	69.0779	48.7043	813.165	121.954	215.175	49.5009	34.5328	78.4628	27.7635	48.8325	31.3253
F1.02.61	1	2	61	J	pPLA.IIdeltaxpPLA.IIIbeta	1	154		0.004166	1.63081	13.6382	14.3602	35.3833	9.13079	38.9256	41.8569	63.7866	35.888	58.5725	81.608	29.5888	206.868	31.8988	74.5414	44.8202	139.598	28.1821	38.339	48.0073	30.0387	35.6546	89.5153	27.9942	28.7679	36.5257	29.2971	24.6958	32.0228	68.8925	45.3969	528.77	102.431	161.327	50.078	33.0608	78.739	25.6918	53.9566	29.3283
F1.02.62	1	2	62	D	pPLA.IxpPLA.IIIbeta	1	207		0.003092	0.721501	14.8358	17.632	36.0002	15.3272	37.5787	54.3186	73.3148	53.8336	65.4032	74.1086	38.2667	218.684	33.3617	74.4626	35.1855	129.225	36.0372	35.8098	60.2762	43.4152	34.0326	69.3576	29.8359	32.8646	49.3283	40.6743	22.8771	32.046	71.2133	61.5138	670.811	104.706	235.983	58.625	34.1693	76.8373	27.2558	56.8769	26.8694
F1.02.63	1	2	63	U	lox4	1	130		0.004918	2.4121	12.9078	11.6744	26.6161	6.56963	34.5326	38.8167	77.8137	33.5357	54.2353	64.2492	32.8526	229.917	30.7251	70.1466	32.6865	128.92	23.886	27.5688	44.0185	28.3724	30.1668	102.704	20.6748	20.9185	28.9693	37.8272	20.6659	29.2962	65.6576	39.7361	562.529	104.031	188.682	46.5009	36.1989	74.4485	23.2898	48.6624	22.0888
F1.02.64	1	2	64	S	pPLA.IIbeta	1	107		0.00598	1.38559	11.9926	11.4374	27.4886	6.04292	36.1252	41.5441	71.9975	39.6966	55.4071	62.935	30.3853	201.851	30.1654	70.6466	31.2536	141.09	28.9735	29.4307	38.4285	26.8193	29.5266	105.823	17.2026	22.3303	32.383	46.2177	21.2928	25.0633	77.9051	40.1825	588.698	99.0168	167.997	38.5852	27.7161	74.3512	16.625	48.1854	26.5925
F1.02.65	1	2	65	O	pPLA.IIIbetaxpPLA.IIIdelta	1	222		0.002888	2.37329	17.5765	14.4909	37.2889	8.24078	45.1369	52.9012	70.4007	36.3738	86.5469	82.5191	36.7761	213.646	39.4631	73.2644	34.1107	130.741	32.1248	37.2586	52.8436	25.3619	42.6705	90.8832	27.3311	25.2452	38.296	40.4468	25.4175	33.4169	56.1665	48.8195	302.341	103.823	129.393	58.8664	42.6244	79.1719	20.6198	50.8264	39.1073
F1.02.66	1	2	66	R	lox1.1	1	231		0.002776	0.51511	17.2816	14.5704	34.8152	8.12405	46.8038	47.9043	54.6558	25.377	66.5878	80.7067	43.0186	256.691	38.9992	80.8813	39.9957	139.972	30.802	34.6001	56.5617	30.2735	40.8077	99.6726	21.1552	28.7723	37.1933	46.0464	24.8862	33.0393	77.3413	39.2243	557.042	102.156	211.315	53.2047	38.1664	81.3036	24.5853	62.9545	23.5479
F1.02.67	1	2	67	L	pPLA.IIIbeta	1	106		0.006016	2.77778	15.6184	13.0528	34.4335	9.69106	36.273	44.8012	82.0023	40.2629	62.0416	67.9392	33.3328	217.483	31.7956	82.6482	37.5002	145.376	30.5401	32.6817	55.8339	31.6601	40.9062	132.813	28.0963	28.1475	36.8491	44.4022	23.8162	33.295	82.3869	41.3824	769.509	126.242	164.108	48.729	40.2504	98.9315	21.4274	73.758	30.6083
F1.02.68	1	2	68	E	pPLA.IIepsilon	1	97		0.00661	0.584163	22.5736	16.395	43.953	13.9762	45.1869	48.9962	76.8027	36.5548	64.876	67.6355	42.4065	205.902	34.8983	78.1413	46.5015	124.735	34.5092	47.2724	58.7336	43.9263	43.5179	88.5569	28.2872	33.471	46.1374	47.6065	27.7409	37.1175	77.7243	49.9846	273.689	78.6415	109.398	70.7096	47.2085	77.3271	31.2103	68.1161	31.2973
F1.02.69	1	2	69	N	pPLA.IIIbetaxpPLA.IIIgammaxpPLAIIIdelta	1	110		0.005808	1.28097	11.7862	11.8706	30.1197	7.96498	34.2117	40.0122	61.824	35.63	55.221	77.6569	33.3307	201.544	26.2755	77.2348	30.3636	122.338	23.7197	26.1831	46.2467	23.8087	31.9768	88.6506	22.1008	22.3767	29.8543	47.2941	19.3596	25.7279	62.8073	46.3001	628.915	124.35	152.982	47.0689	35.7016	68.6404	15.7968	45.5223	25.7929
F1.02.70	1	2	70	F	pPLA.IIalpha	1	90		0.007116	0.981932	10.7988	10.3782	25.5325	6.37427	28.3149	39.0151	51.3848	17.5491	47.3196	56.2657	27.0603	192.149	26.9815	60.2189	33.5105	124.682	20.1272	20.9421	26.7162	27.8704	21.9088	68.4664	13.4331	17.1738	27.9099	39.9849	22.0726	19.4369	64.0721	36.1916	647.377	78.7863	149.025	33.3274	40.391	64.0192	15.1645	54.053	22.3639
F1.02.71	1	2	71	M	WT	1	234		0.00274	0.434405	18.3663	15.1671	39.6008	8.17953	41.6407	54.3298	64.7256	35.2376	69.4229	93.37	38.3647	204.03	36.7453	79.959	40.3858	136.855	33.0091	38.7919	47.7473	39.233	37.242	85.3816	30.3989	30.4291	41.1551	44.5984	27.1259	35.116	72.0056	50.2977	519.888	101.737	200.368	61.2101	40.2606	84.018	22.6023	60.9561	32.7405
F1.02.72	1	2	72	B	pPLA.I	1	182		0.003524	1.54408	16.3385	13.9528	33.8574	7.82896	42.8272	52.8245	59.559	34.7708	66.7123	81.7403	38.2937	208.648	34.1087	77.8934	40.7493	128.761	35.8681	31.7228	46.72	34.4316	46.9781	84.9702	21.1261	27.7626	40.4523	45.2783	27.9948	29.508	79.3219	32.8503	556.079	98.7876	203.327	52.8367	30.5451	85.2192	21.9541	58.8287	30.2264
F1.03.01	1	3	1	H	pPLA.IIgamma	1	107		0.006008	7.36041	13.832	11.577	25.0637	7.15393	33.4729	38.3496	48.6981	26.9751	46.8175	49.2056	31.1549	239.124	32.9641	57.576	32.9678	115.07	23.0498	29.0685	36.7439	29.3216	23.4885	86.3613	17.3476	22.311	30.0987	36.1386	13.3105	23.0149	72.2605	29.2268	686.05	116.551	111.057	41.538	39.3367	86.0043	20.9287	59.5664	26.259
F1.03.02	1	3	2	V	lox5.1	1	106		0.006052	2.27488	14.5149	11.4375	28.1474	7.15717	36.2002	42.7709	49.1735	32.7609	51.9467	53.2078	32.6265	262.214	32.7533	62.2378	38.7263	137.43	31.0715	31.8722	46.3649	26.7545	36.204	125.273	20.5501	20.4409	33.1859	34.9146	25.5574	28.5479	79.2844	39.7856	819.954	122.554	141.596	40.3056	36.0731	98.1927	24.0215	64.9323	24.815
F1.03.03	1	3	3	K	pPLA.IIIalpha	1	101		0.006338	2.80973	11.5118	10.8188	18.2543	5.90709	30.7676	33.6044	45.0988	17.5325	41.13	41.8524	28.6004	235.905	28.9889	49.5725	34.9444	112.338	21.4394	23.2503	30.2206	28.3874	26.4434	79.7061	13.4375	18.6194	30.1368	29.9023	14.4522	19.7396	65.71	26.9271	696.522	95.3905	129.999	34.8756	29.0683	77.0586	17.1817	43.8483	20.8233
F1.03.04	1	3	4	G	pPLA.IIalphaxpPLA.IIIbeta	1	87		0.007342	1.66344	10.2163	10.0286	18.4358	4.64912	29.2156	34.5224	47.1093	20.2041	34.3965	45.9329	27.9147	237.407	32.0904	50.7055	28.9147	111.418	25.5502	23.0191	36.5507	23.4533	22.8975	94.072	14.1361	18.7799	25.3766	26.8577	16.7054	20.7562	69.1621	27.3825	762.816	91.2772	109.812	32.638	38.4304	91.0351	19.1373	40.0354	17.5622
F1.03.05	1	3	5	I	pPLA.IIdelta	1	100		0.006392	3.39759	22.6397	11.5375	33.0908	7.92937	37.4679	37.9792	50.9261	28.6302	53.7777	57.2891	33.2901	325.375	30.0464	63.8607	47.9554	150.365	27.3671	31.686	70.2489	30.2575	27.2795	167.118	13.9696	23.1513	30.7051	34.9957	17.2031	29.2521	92.5737	35.0107	1491.79	174.693	148.018	45.0234	37.538	106.679	21.1067	58.3605	25.1049
F1.03.06	1	3	6	T	lox1.1xlox5.1	1	147		0.004436	2.69231	11.8771	10.9858	22.958	5.97888	33.3008	40.4431	34.3383	31.7646	48.6107	46.8274	28.6397	256.655	29.2299	56.4413	35.0945	115.888	24.4272	27.1056	44.2695	20.1983	29.173	97.0976	12.7287	23.3234	27.8516	33.4381	22.2008	23.2745	77.3814	33.1017	704.832	108.608	136.292	40.4849	32.9093	85.7066	21.0419	41.5789	21.219
F1.03.07	1	3	7	Q	pPLA.IIIdelta	1	88		0.007254	9.80287	10.5785	10.1847	22.1075	5.87499	29.5129	36.2927	38.7512	22.7376	39.2934	46.8017	29.1889	298.761	31.3782	52.8618	35.2515	133.284	26.9977	23.9968	40.3124	21.2236	26.0431	75.9845	13.7936	18.9041	23.7977	26.7641	16.7657	21.8562	74.5875	25.7608	763.468	99.4942	106.709	29.2263	33.0017	91.6962	20.6318	47.4373	17.2394
F1.03.08	1	3	8	C	pPLA.IxpPLA.IIalpha	1	100		0.006384	5.38593	12.6208	10.5763	27.2004	6.96967	32.9275	36.0007	38.962	27.8562	44.5115	50.6218	30.131	261.456	27.3453	53.6906	34.5323	110.146	28.6414	28.4389	34.8933	27.8085	26.0306	94.7516	17.6723	24.7574	28.4304	25.3859	22.0915	21.3344	71.517	31.5988	576.644	93.0768	128.58	39.2951	36.898	87.7169	26.1189	38.5857	22.9718
F1.03.09	1	3	9	A	WT	1	84		0.00759	4.1784	12.7255	10.4872	20.4499	5.94241	31.7947	37.6334	54.603	23.2012	44.4007	52.1186	33.9853	266.593	25.6279	52.1873	44.2485	113.186	27.2402	30.1789	41.571	24.4457	28.149	99.6361	17.2065	20.0327	32.0322	27.4806	20.0492	19.4002	66.657	35.3907	720.115	94.8953	128.026	37.6819	28.9053	85.954	19.1278	47.1493	16.3689
F1.03.10	1	3	10	W	lox6	1	89		0.007176	1.63082	10.4489	9.6998	23.6228	6.56682	29.7875	38.6814	59.4243	28.0312	40.5483	47.2846	31.0621	282.877	28.7267	56.8693	39.6257	123.249	23.9578	30.0728	38.7466	24.8692	27.1123	163.879	13.0052	20.6302	27.0979	26.5114	18.1597	25.311	86.6179	38.5946	665.097	101.154	125.451	38.8669	32.1751	118.447	23.2223	58.782	18.8445
F1.03.11	1	3	11	X	opr3	1	100		0.00642	4.73322	10.0817	9.27171	21.1964	6.91706	33.0433	38.9014	35.3261	33.6093	44.6218	47.4712	32.0502	253.285	28.326	55.9454	43.9844	111.127	26.5523	31.0237	43.7256	25.5542	33.0489	150.256	11.7188	23.3008	28.1843	33.4602	21.4424	23.6476	79.6631	32.5707	485.328	89.969	126.924	38.2961	44.2838	88.5361	23.3049	55.6235	21.0614
[truncated: 3,517 more rows]
[truncated: 317 more columns]

## Sheet: Table S9
Table S9. Statistically significant pairwise comparisons of lipid levels between wild-type and mutant Arabidopsis rosettes undergoing the same treatment (i.e., on the same tray). A Dunnett p value with Bonferroni correction of less than 0.05 was considered a significant difference for the indicated comparison. The p values in column F were used to label Figure S10.
[truncated: 178 more rows]

[truncated: 4 more sheets: Table S10, Table S11, Table S12, Table S13]
